# Supplementary material for: Mutation at the Site of Hydroxylation in the Ribosomal Protein uL15 (RPL27a) Causes Specific Changes in the Repertoire of mRNAs Translated in Mammalian Cells
Source: Int J Mol Sci. 2023 Mar 24;24(7):6173. doi: 10.3390/ijms24076173 (PMC10094517; doi:10.3390/ijms24076173)
Supplement: Supplementary file 1 [file ijms-24-06173-s001.zip]

Archive with 6 entries (6 files):
- Supplementary materials.pdf
- Table S2.xlsx
- Table S3.xlsx
- Table S4.xlsx
- Table S5.xlsx
- Table S6.xlsx
