# Supplementary material for: Mutation at the Site of Hydroxylation in the Ribosomal Protein uL15 (RPL27a) Causes Specific Changes in the Repertoire of mRNAs Translated in Mammalian Cells
Source: Int J Mol Sci. 2023 Mar 24;24(7):6173. doi: 10.3390/ijms24076173 (PMC10094517; doi:10.3390/ijms24076173)
Supplement: Supplementary file 1 [file ijms-24-06173-s001.zip › Table S2.xlsx]

## Sheet: Лист1
hgnc_symbol	ensembl	entrez	description	gene_biotype	baseMean	log2FoldChange	lfcSE	LFC_Shrunken	lfcSE_Shrunken	stat	pvalue	padj	L15.T1	L15.T2	L15.T3	L15.T4	L15m.T1	L15m.T2	L15m.T3	L15m.T4
ANKRD28	ENSG00000206560	23243	ankyrin repeat domain 28 [Source:HGNC Symbol;Acc:HGNC:29024]	protein_coding	530.925	-1.18523	0.151922	-1.14546	0.154588	-7.8016	6.11278e-15	8.47781e-11	818.112	691.199	696.259	741.106	295.108	366.523	282.316	356.781
RPS21	ENSG00000171858	6227	ribosomal protein S21 [Source:HGNC Symbol;Acc:HGNC:10409]	protein_coding	5304.27	0.63683	0.0841295	0.616194	0.0854218	7.56964	3.74252e-14	2.59525e-10	3909.94	3775.57	4534.96	4385.35	6687.33	6251.58	6703.55	6185.9
APEX2	ENSG00000169188	27301	apurinic/apyrimidinic endodeoxyribonuclease 2 [Source:HGNC Symbol;Acc:HGNC:17889]	protein_coding	663.039	-1.21208	0.172024	-1.15966	0.175623	-7.04597	1.84171e-12	6.38566e-09	860.612	1011.98	898.174	937.544	293.772	404.949	459.003	438.28
TOR1AIP2	ENSG00000169905	163590	torsin 1A interacting protein 2 [Source:HGNC Symbol;Acc:HGNC:24055]	protein_coding	1140.93	-0.846363	0.119834	-0.812203	0.122301	-7.06281	1.63173e-12	6.38566e-09	1585.46	1486.5	1311.29	1476.12	801.197	895.617	707.709	863.519
GPC6	ENSG00000183098	10082	glypican 6 [Source:HGNC Symbol;Acc:HGNC:4454]	protein_coding	167.775	2.22932	0.333903	2.1262	0.342001	6.67654	2.44644e-11	5.8072e-08	75.5544	27.8416	61.5028	69.4026	235.018	319.23	276.554	277.094
PRMT9	ENSG00000164169	90826	protein arginine methyltransferase 9 [Source:HGNC Symbol;Acc:HGNC:25099]	protein_coding	195.853	-2.94604	0.443013	-2.80558	0.453379	-6.65	2.93103e-11	5.8072e-08	271.524	363.152	374.819	379.076	12.018	44.3375	70.0988	51.7967
PSMA7	ENSG00000101182	5688	proteasome 20S subunit alpha 7 [Source:HGNC Symbol;Acc:HGNC:9536]	protein_coding	1556.64	0.714563	0.107402	0.682692	0.109787	6.6532	2.86794e-11	5.8072e-08	1260.81	1054.35	1144.19	1244.78	1829.4	2190.27	1852.34	1877
TOMM7	ENSG00000196683	54543	translocase of outer mitochondrial membrane 7 [Source:HGNC Symbol;Acc:HGNC:21648]	protein_coding	1513.22	0.638985	0.0979866	0.609931	0.100071	6.52114	6.97741e-11	1.20962e-07	1107.34	1239.56	1140.7	1247.62	2033.71	1690.74	1860.02	1786.08
ALDH9A1	ENSG00000143149	223	aldehyde dehydrogenase 9 family member A1 [Source:HGNC Symbol;Acc:HGNC:412]	protein_coding	1015.77	-0.831803	0.129382	-0.790931	0.132592	-6.42904	1.28409e-10	1.97878e-07	1481.57	1291.61	1108.21	1319.05	715.736	774.428	662.577	772.966
SNX2	ENSG00000205302	6643	sorting nexin 2 [Source:HGNC Symbol;Acc:HGNC:11173]	protein_coding	1482.43	0.762619	0.12052	0.724364	0.1235	6.32773	2.48796e-10	3.45055e-07	914.916	1054.35	1253.27	1171.32	1816.05	1912.42	1938.76	1798.39
RETREG1	ENSG00000154153	54463	reticulophagy regulator 1 [Source:HGNC Symbol;Acc:HGNC:25964]	protein_coding	118.343	-1.98907	0.318512	-1.88085	0.328502	-6.24487	4.24142e-10	5.34766e-07	182.983	152.524	226.284	191.973	34.7185	65.0283	37.45	55.781
PDP2	ENSG00000172840	57546	pyruvate dehyrogenase phosphatase catalytic subunit 2 [Source:HGNC Symbol;Acc:HGNC:30263]	protein_coding	409.252	-1.26268	0.208333	-1.19083	0.214264	-6.06085	1.35406e-09	1.56495e-06	664.642	443.045	626.633	582.413	283.09	189.173	222.78	262.243
DDX31	ENSG00000125485	64794	DEAD-box helicase 31 [Source:HGNC Symbol;Acc:HGNC:16715]	protein_coding	297.773	-1.50637	0.264641	-1.40761	0.274034	-5.69212	1.25471e-08	1.33858e-05	375.411	578.622	352.771	456.19	105.491	162.571	180.528	170.603
PCBD2	ENSG00000132570	84105	pterin-4 alpha-carbinolamine dehydratase 2 [Source:HGNC Symbol;Acc:HGNC:24474]	protein_coding	58.3383	7.25765	1.29057	6.74278	1.35466	5.62359	1.87024e-08	1.85274e-05	1.18054	1.21051	1.16043	0	76.1137	2.95583	161.323	222.762
NAIF1	ENSG00000171169	203245	nuclear apoptosis inducing factor 1 [Source:HGNC Symbol;Acc:HGNC:25446]	protein_coding	112.009	-7.86568	1.40364	-0.0257807	0.116847	-5.60376	2.09751e-08	1.93936e-05	531.242	62.9463	1.16043	295.468	1.33533	2.95583	0.960257	0
RNF8	ENSG00000112130	9025	ring finger protein 8 [Source:HGNC Symbol;Acc:HGNC:10071]	protein_coding	448.527	-1.04239	0.187373	-0.972116	0.193604	-5.56317	2.64917e-08	2.29633e-05	541.867	670.621	601.103	612.447	308.461	203.952	336.09	313.678
HIVEP3	ENSG00000127124	59269	HIVEP zinc finger 3 [Source:HGNC Symbol;Acc:HGNC:13561]	protein_coding	37.0734	-6.39822	1.16316	-0.0461049	0.127108	-5.50072	3.78254e-08	3.0361e-05	59.0269	14.5261	93.9949	123.788	1.33533	2.95583	0.960257	0
SF3B2	ENSG00000087365	10992	splicing factor 3b subunit 2 [Source:HGNC Symbol;Acc:HGNC:10769]	protein_coding	3828.44	-0.322901	0.0587787	-0.30504	0.0597804	-5.4935	3.94042e-08	3.0361e-05	4369.17	4222.25	4133.46	4297.28	3220.81	3422.85	3520.3	3441.4
ZDHHC5	ENSG00000156599	25921	zinc finger DHHC-type palmitoyltransferase 5 [Source:HGNC Symbol;Acc:HGNC:18472]	protein_coding	855.855	-0.849881	0.156379	-0.790132	0.162099	-5.43475	5.48731e-08	4.00544e-05	1112.07	1281.93	888.89	1121.81	681.018	591.166	531.022	638.946
BMF	ENSG00000104081	90427	Bcl2 modifying factor [Source:HGNC Symbol;Acc:HGNC:24132]	protein_coding	49.7035	-6.76952	1.24882	-0.0362272	0.12131	-5.42073	5.93547e-08	4.04346e-05	103.887	9.68405	49.8985	228.907	1.33533	2.95583	0.960257	0
BUB1B	ENSG00000156970	701	BUB1 mitotic checkpoint serine/threonine kinase B [Source:HGNC Symbol;Acc:HGNC:1149]	protein_coding	958.669	-0.678801	0.125351	-0.631934	0.129533	-5.41519	6.12248e-08	4.04346e-05	1365.88	1095.51	1078.04	1188.77	779.832	656.194	739.398	765.721
ARHGEF28	ENSG00000214944	64283	Rho guanine nucleotide exchange factor 28 [Source:HGNC Symbol;Acc:HGNC:30322]	protein_coding	50.1573	-6.77645	1.25592	-0.0355461	0.120967	-5.39561	6.82912e-08	4.30514e-05	21.2497	185.207	16.246	173.304	1.33533	2.95583	0.960257	0
ZNF573	ENSG00000189144	126231	zinc finger protein 573 [Source:HGNC Symbol;Acc:HGNC:26420]	protein_coding	56.6805	3.72415	0.697808	3.44171	0.731788	5.33693	9.45341e-08	5.70041e-05	1.18054	16.9471	6.96259	6.89967	50.7425	174.394	82.5821	113.735
LXN	ENSG00000079257	56925	latexin [Source:HGNC Symbol;Acc:HGNC:13347]	protein_coding	54.3815	7.13777	1.33938	6.56962	1.41479	5.32916	9.86671e-08	5.70172e-05	1.18054	1.21051	1.16043	0	18.6946	5.91166	224.7	182.194
CCDC180	ENSG00000197816	100499483	coiled-coil domain containing 180 [Source:HGNC Symbol;Acc:HGNC:29303]	protein_coding	30.9756	-6.14037	1.15885	-0.0460276	0.127022	-5.29866	1.16658e-07	6.4717e-05	35.4161	56.8938	23.2086	127.035	1.33533	2.95583	0.960257	0
DYSF	ENSG00000135636	8291	dysferlin [Source:HGNC Symbol;Acc:HGNC:3097]	protein_coding	27.2938	-5.07792	0.961132	-0.0641263	0.14217	-5.28327	1.26897e-07	6.76898e-05	83.8181	48.4203	19.7273	58.8501	1.33533	2.95583	2.88077	0.362214
MRPL57	ENSG00000173141	78988	mitochondrial ribosomal protein L57 [Source:HGNC Symbol;Acc:HGNC:14514]	protein_coding	505.164	0.977163	0.185275	0.903901	0.192627	5.27412	1.33395e-07	6.85206e-05	296.315	313.521	387.584	365.683	814.551	529.094	689.464	645.104
MBIP	ENSG00000151332	51562	MAP3K12 binding inhibitory protein 1 [Source:HGNC Symbol;Acc:HGNC:20427]	protein_coding	601.544	0.834108	0.158354	0.772069	0.164551	5.26738	1.38388e-07	6.85465e-05	378.952	527.781	364.375	457.408	799.862	753.737	779.729	750.508
NPY1R	ENSG00000164128	4886	neuropeptide Y receptor Y1 [Source:HGNC Symbol;Acc:HGNC:7956]	protein_coding	81.0252	-7.39292	1.4101	-0.0252459	0.116652	-5.24284	1.58128e-07	7.56232e-05	342.356	1.21051	44.0964	255.288	1.33533	2.95583	0.960257	0
DYRK4	ENSG00000010219	8798	dual specificity tyrosine phosphorylation regulated kinase 4 [Source:HGNC Symbol;Acc:HGNC:3095]	protein_coding	432.835	0.905836	0.175368	0.835131	0.182727	5.16533	2.40015e-07	0.000110959	324.648	221.523	335.365	321.444	574.191	570.475	571.353	543.684
MTMR11	ENSG00000014914	10903	myotubularin related protein 11 [Source:HGNC Symbol;Acc:HGNC:24307]	protein_coding	76.0137	-7.29482	1.42237	-0.0245575	0.116416	-5.12864	2.91842e-07	0.000130566	322.287	9.68405	4.64172	266.246	1.33533	2.95583	0.960257	0
SLC31A2	ENSG00000136867	1318	solute carrier family 31 member 2 [Source:HGNC Symbol;Acc:HGNC:11017]	protein_coding	50.2721	-6.74357	1.31941	-0.0302666	0.118546	-5.11105	3.20375e-07	0.000138852	184.164	7.26304	22.0482	183.45	1.33533	2.95583	0.960257	0
NBPF11	ENSG00000263956	200030	NBPF member 11 [Source:HGNC Symbol;Acc:HGNC:31993]	protein_coding	777.743	-0.598282	0.118162	-0.551305	0.122684	-5.06323	4.12207e-07	0.000173239	1037.69	872.775	888.89	944.849	556.832	662.106	618.405	640.395
H2BC11	ENSG00000124635	8970	H2B clustered histone 11 [Source:HGNC Symbol;Acc:HGNC:4761]	protein_coding	105.289	2.12105	0.419431	1.941	0.440706	5.05697	4.25961e-07	0.000173755	21.2497	48.4203	42.936	43.8332	221.665	203.952	92.1847	168.068
QRICH2	ENSG00000129646	84074	glutamine rich 2 [Source:HGNC Symbol;Acc:HGNC:25326]	protein_coding	46.2731	-6.62383	1.31617	-0.0302395	0.118529	-5.03266	4.83724e-07	0.000191679	3.54161	49.6308	163.621	148.14	1.33533	2.95583	0.960257	0
PTRHD1	ENSG00000184924	391356	peptidyl-tRNA hydrolase domain containing 1 [Source:HGNC Symbol;Acc:HGNC:33782]	protein_coding	534.343	1.09619	0.220523	1.00206	0.231109	4.97086	6.66566e-07	0.000256795	363.605	228.786	407.311	362.842	893.335	623.68	688.504	706.68
SUPT20H	ENSG00000102710	55578	SPT20 homolog, SAGA complex component [Source:HGNC Symbol;Acc:HGNC:20596]	protein_coding	509.922	-0.588221	0.118973	-0.540031	0.123512	-4.94415	7.64764e-07	0.000281318	606.796	618.569	623.151	610.012	396.593	363.567	439.798	420.893
ZNF165	ENSG00000197279	7718	zinc finger protein 165 [Source:HGNC Symbol;Acc:HGNC:12953]	protein_coding	89.4469	7.35095	1.48726	6.66356	1.60448	4.94262	7.70789e-07	0.000281318	1.18054	1.21051	2.32086	0	1.33533	496.58	5.76154	207.187
COMMD6	ENSG00000188243	170622	COMM domain containing 6 [Source:HGNC Symbol;Acc:HGNC:24015]	protein_coding	1021.49	0.71899	0.147678	0.656438	0.154456	4.86864	1.12367e-06	0.000390898	711.864	660.936	901.655	808.885	1089.63	1430.62	1332.84	1235.51
TRPC3	ENSG00000138741	7222	transient receptor potential cation channel subfamily C member 3 [Source:HGNC Symbol;Acc:HGNC:12335]	protein_coding	32.4216	6.38471	1.31289	5.76268	1.40037	4.8631	1.15559e-06	0.000390898	1.18054	1.21051	1.16043	0	2.67066	94.5866	55.6949	102.869
ZNF616	ENSG00000204611	90317	zinc finger protein 616 [Source:HGNC Symbol;Acc:HGNC:28062]	protein_coding	199.078	-1.06139	0.218159	-0.965214	0.229	-4.86523	1.14326e-06	0.000390898	302.218	206.997	300.552	268.681	124.186	124.145	126.754	139.09
C17orf113	ENSG00000267221	110806298	chromosome 17 open reading frame 113 [Source:HGNC Symbol;Acc:HGNC:53437]	protein_coding	63.0533	-7.01297	1.44398	-0.023458	0.11605	-4.85671	1.19354e-06	0.000394124	24.7913	279.627	1.16043	193.597	1.33533	2.95583	0.960257	0
ABHD3	ENSG00000158201	171586	abhydrolase domain containing 3, phospholipase [Source:HGNC Symbol;Acc:HGNC:18718]	protein_coding	176.632	-1.50398	0.311501	-1.36342	0.3278	-4.82818	1.37787e-06	0.000399269	331.731	273.574	168.263	273.958	69.4371	79.8074	115.231	101.058
FAM102B	ENSG00000162636	284611	family with sequence similarity 102 member B [Source:HGNC Symbol;Acc:HGNC:27637]	protein_coding	388.215	1.08592	0.224885	0.986439	0.236675	4.8288	1.3736e-06	0.000399269	275.065	206.997	247.172	263.405	363.209	605.945	627.048	516.88
MCTS1	ENSG00000232119	28985	MCTS1 re-initiation and release factor [Source:HGNC Symbol;Acc:HGNC:23357]	protein_coding	1388.83	0.469521	0.0970983	0.431133	0.100626	4.83553	1.32794e-06	0.000399269	1174.63	1267.4	1054.83	1157.93	1524.95	1735.07	1557.54	1638.3
RARS2	ENSG00000146282	57038	arginyl-tRNA synthetase 2, mitochondrial [Source:HGNC Symbol;Acc:HGNC:21406]	protein_coding	337.713	-0.977648	0.202053	-0.888576	0.211974	-4.83857	1.30777e-06	0.000399269	352.981	481.782	512.911	448.885	264.395	186.217	212.217	242.321
RPS29	ENSG00000213741	6235	ribosomal protein S29 [Source:HGNC Symbol;Acc:HGNC:10419]	protein_coding	6779.3	0.809152	0.167191	0.737178	0.175221	4.83969	1.30041e-06	0.000399269	4012.65	4020.09	6591.25	5083.84	9670.45	7487.12	8973.6	8395.41
ZNF583	ENSG00000198440	147949	zinc finger protein 583 [Source:HGNC Symbol;Acc:HGNC:26427]	protein_coding	52.8832	-2.43752	0.504913	-2.20764	0.531841	-4.8276	1.38185e-06	0.000399269	74.3738	62.9463	123.006	97.4071	6.67664	17.735	22.0859	18.8352
NDUFA3	ENSG00000170906	4696	NADH:ubiquinone oxidoreductase subunit A3 [Source:HGNC Symbol;Acc:HGNC:7686]	protein_coding	926.944	0.554604	0.115024	0.507359	0.119656	4.82164	1.42382e-06	0.000403	702.42	697.252	786.772	814.973	1115	1055.23	1213.76	1030.14
KCNC3	ENSG00000131398	3748	potassium voltage-gated channel subfamily C member 3 [Source:HGNC Symbol;Acc:HGNC:6235]	protein_coding	41.9873	-4.34198	0.901762	-0.0523015	0.131401	-4.815	1.47201e-06	0.000408306	127.498	47.2097	55.7007	86.043	5.34132	11.8233	1.92051	0.362214
TFAP2C	ENSG00000087510	7022	transcription factor AP-2 gamma [Source:HGNC Symbol;Acc:HGNC:11744]	protein_coding	71.5989	-3.85897	0.806866	-0.0607882	0.138732	-4.78267	1.72986e-06	0.00047042	296.315	61.7358	29.0108	148.952	18.6946	5.91166	3.84103	8.33093
TERT	ENSG00000164362	7015	telomerase reverse transcriptase [Source:HGNC Symbol;Acc:HGNC:11730]	protein_coding	63.1778	-7.00565	1.46771	-0.0223505	0.115706	-4.7732	1.81324e-06	0.000483611	1.18054	307.469	17.4065	174.115	1.33533	2.95583	0.960257	0
ATG101	ENSG00000123395	60673	autophagy related 101 [Source:HGNC Symbol;Acc:HGNC:25679]	protein_coding	586.131	0.611329	0.129105	0.556153	0.135065	4.73515	2.18894e-06	0.000564436	420.271	475.729	467.654	483.789	646.299	812.854	697.147	685.31
RBX1	ENSG00000100387	9978	ring-box 1 [Source:HGNC Symbol;Acc:HGNC:9928]	protein_coding	1079.27	0.692604	0.146429	0.628797	0.153542	4.72995	2.24573e-06	0.000564436	809.849	708.146	917.901	860.024	1539.63	1398.11	1105.26	1295.28
RYR2	ENSG00000198626	6262	ryanodine receptor 2 [Source:HGNC Symbol;Acc:HGNC:10484]	protein_coding	36.5876	3.54979	0.749931	3.19907	0.798144	4.73349	2.20692e-06	0.000564436	0	6.05253	11.6043	5.27622	58.7545	103.454	44.1718	63.3875
UQCC2	ENSG00000137288	84300	ubiquinol-cytochrome c reductase complex assembly factor 2 [Source:HGNC Symbol;Acc:HGNC:21237]	protein_coding	553.705	0.712366	0.150703	0.646474	0.158002	4.72696	2.27907e-06	0.000564436	413.188	352.257	469.975	442.797	785.173	641.415	661.617	663.215
RPL37	ENSG00000145592	6167	ribosomal protein L37 [Source:HGNC Symbol;Acc:HGNC:10347]	protein_coding	12355.9	0.706977	0.150189	0.627277	0.158241	4.70726	2.51072e-06	0.000610899	7197.74	8358.55	12329.6	9664.41	16069.3	14746.6	15539.8	14941
VIPR1	ENSG00000114812	7433	vasoactive intestinal peptide receptor 1 [Source:HGNC Symbol;Acc:HGNC:12694]	protein_coding	61.0132	-5.07413	1.08114	-0.0355594	0.120916	-4.6933	2.68834e-06	0.000642837	5.90269	274.785	66.1446	125.818	5.34132	5.91166	3.84103	0.362214
KANSL1	ENSG00000120071	284058	KAT8 regulatory NSL complex subunit 1 [Source:HGNC Symbol;Acc:HGNC:24565]	protein_coding	764.712	-0.913596	0.194861	-0.823931	0.205617	-4.68846	2.75265e-06	0.000647059	1257.27	767.461	951.553	1015.88	562.173	594.122	418.672	550.566
MRPL47	ENSG00000136522	57129	mitochondrial ribosomal protein L47 [Source:HGNC Symbol;Acc:HGNC:16652]	protein_coding	633.254	0.974445	0.208027	0.879602	0.219489	4.68424	2.81005e-06	0.000649544	308.12	381.309	567.451	451.32	958.766	786.251	801.815	810.998
ZMYM3	ENSG00000147130	9203	zinc finger MYM-type containing 3 [Source:HGNC Symbol;Acc:HGNC:13054]	protein_coding	844.872	-0.59892	0.128739	-0.542578	0.134684	-4.6522	3.28417e-06	0.000746692	1041.23	1116.09	894.692	1023.99	757.131	608.901	628.008	688.932
COMMD4	ENSG00000140365	54939	COMM domain containing 4 [Source:HGNC Symbol;Acc:HGNC:26027]	protein_coding	1085.14	0.55249	0.11955	0.500872	0.124855	4.62143	3.81105e-06	0.000852507	844.084	813.46	946.912	919.28	1301.95	1135.04	1468.23	1252.18
ATP5F1E	ENSG00000124172	514	ATP synthase F1 subunit epsilon [Source:HGNC Symbol;Acc:HGNC:838]	protein_coding	2387.31	0.742678	0.160924	0.67029	0.169437	4.61509	3.92934e-06	0.000865016	1585.46	1405.4	2302.3	1849.52	2676	3079.98	3282.16	2917.64
RPL41	ENSG00000229117	6171	ribosomal protein L41 [Source:HGNC Symbol;Acc:HGNC:10354]	protein_coding	32950.7	0.633094	0.137503	0.573627	0.144322	4.6042	4.14047e-06	0.000897253	21172.9	22996	32181.1	26989.1	46335.9	36705.5	38830.9	38394
RPL31	ENSG00000071082	6160	ribosomal protein L31 [Source:HGNC Symbol;Acc:HGNC:10334]	protein_coding	14787.3	0.476052	0.103607	0.43293	0.107849	4.59479	4.33188e-06	0.000924289	10956.6	11189.9	14579.7	12751.4	18547.7	16561.5	16937	16774.9
WDR77	ENSG00000116455	79084	WD repeat domain 77 [Source:HGNC Symbol;Acc:HGNC:29652]	protein_coding	626.9	-0.854871	0.187257	-0.766234	0.198174	-4.56524	4.98932e-06	0.00104844	875.959	746.882	790.254	813.755	540.808	467.021	316.885	463.635
SPICE1	ENSG00000163611	152185	spindle and centriole associated protein 1 [Source:HGNC Symbol;Acc:HGNC:25083]	protein_coding	36.4139	-6.24294	1.37259	-0.0263764	0.117013	-4.54828	5.40871e-06	0.00110314	3.54161	164.629	20.8878	97.0013	1.33533	2.95583	0.960257	0
ZNF830	ENSG00000198783	91603	zinc finger protein 830 [Source:HGNC Symbol;Acc:HGNC:28291]	protein_coding	218.209	-0.839718	0.184532	-0.753105	0.194707	-4.55052	5.35124e-06	0.00110314	306.94	267.522	268.06	281.669	174.928	133.012	146.919	166.619
ISG20	ENSG00000172183	3669	interferon stimulated exonuclease gene 20 [Source:HGNC Symbol;Acc:HGNC:6130]	protein_coding	23.9189	-4.79617	1.0561	-0.044733	0.126071	-4.5414	5.58818e-06	0.00112322	55.4852	37.5257	39.4547	52.7622	0	0	5.76154	0.362214
KLHL9	ENSG00000198642	55958	kelch like family member 9 [Source:HGNC Symbol;Acc:HGNC:18732]	protein_coding	826.626	-0.919299	0.202576	-0.820935	0.214887	-4.53805	5.67774e-06	0.00112492	846.445	1193.56	1181.32	1100.29	397.928	688.709	610.723	594.032
POMP	ENSG00000132963	51371	proteasome maturation protein [Source:HGNC Symbol;Acc:HGNC:20330]	protein_coding	1472.16	0.609083	0.134329	0.548295	0.141101	4.53425	5.78092e-06	0.00112923	989.29	1048.3	1409.92	1215.15	1904.18	1723.25	1760.15	1727.04
USPL1	ENSG00000132952	10208	ubiquitin specific peptidase like 1 [Source:HGNC Symbol;Acc:HGNC:20294]	protein_coding	377.693	-1.56304	0.34599	-1.39169	0.369498	-4.51758	6.25504e-06	0.00120488	501.728	476.939	673.05	603.518	271.072	212.82	80.6616	201.753
COX5B	ENSG00000135940	1329	cytochrome c oxidase subunit 5B [Source:HGNC Symbol;Acc:HGNC:2269]	protein_coding	3032.92	0.616006	0.136786	0.554522	0.14381	4.50344	6.68626e-06	0.00124134	1938.44	2241.86	2917.32	2483.88	4060.73	3360.78	3695.07	3565.28
MAP2K6	ENSG00000108984	5608	mitogen-activated protein kinase kinase 6 [Source:HGNC Symbol;Acc:HGNC:6846]	protein_coding	265.995	-0.815736	0.181132	-0.729564	0.191705	-4.50355	6.68265e-06	0.00124134	383.675	332.889	298.231	341.737	162.91	206.908	198.773	202.84
WDR61	ENSG00000140395	80349	WD repeat domain 61 [Source:HGNC Symbol;Acc:HGNC:30300]	protein_coding	609.912	0.751557	0.166916	0.673671	0.176169	4.5026	6.71285e-06	0.00124134	518.256	393.415	435.162	475.266	785.173	617.769	899.761	754.493
SKA2	ENSG00000182628	348235	spindle and kinetochore associated complex subunit 2 [Source:HGNC Symbol;Acc:HGNC:28006]	protein_coding	1459.07	1.06323	0.236526	0.945986	0.251822	4.49518	6.9512e-06	0.0012685	748.461	765.04	1286.92	972.854	1615.75	2745.97	1572.9	1964.65
PIN4	ENSG00000102309	5303	peptidylprolyl cis/trans isomerase, NIMA-interacting 4 [Source:HGNC Symbol;Acc:HGNC:8992]	protein_coding	986.788	0.434962	0.096878	0.394043	0.100664	4.48979	7.12941e-06	0.00128413	773.252	864.302	849.436	871.388	1171.08	1064.1	1197.44	1103.31
RPL27	ENSG00000131469	6155	ribosomal protein L27 [Source:HGNC Symbol;Acc:HGNC:10328]	protein_coding	18521.9	0.596035	0.133464	0.517519	0.141017	4.46589	7.97379e-06	0.00139214	12472.4	12486.4	18171.2	15864.4	24898.5	21618.9	21804.6	20858.5
SCAMP2	ENSG00000140497	10066	secretory carrier membrane protein 2 [Source:HGNC Symbol;Acc:HGNC:10564]	protein_coding	920.033	-0.762643	0.170789	-0.681249	0.180698	-4.46541	7.99157e-06	0.00139214	929.083	1337.61	1194.08	1173.35	823.898	605.945	586.717	709.578
ZNF75D	ENSG00000186376	7626	zinc finger protein 75D [Source:HGNC Symbol;Acc:HGNC:13145]	protein_coding	199.885	1.71568	0.384305	1.52739	0.410481	4.46438	8.03025e-06	0.00139214	121.595	66.5778	87.0323	98.6247	514.102	183.262	221.819	306.071
ELAVL2	ENSG00000107105	1993	ELAV like RNA binding protein 2 [Source:HGNC Symbol;Acc:HGNC:3313]	protein_coding	78.016	-1.74225	0.391466	-1.54656	0.416844	-4.45057	8.56425e-06	0.00146639	80.2765	173.102	106.76	122.976	41.3952	23.6466	36.4898	39.4814
GGPS1	ENSG00000152904	9453	geranylgeranyl diphosphate synthase 1 [Source:HGNC Symbol;Acc:HGNC:4249]	protein_coding	484.744	0.572596	0.129326	0.513138	0.135894	4.42755	9.53086e-06	0.00159257	368.328	386.152	394.547	410.328	650.305	532.05	578.075	558.173
HOXD8	ENSG00000175879	3234	homeobox D8 [Source:HGNC Symbol;Acc:HGNC:5139]	protein_coding	50.8415	-6.2094	1.40214	-0.0231968	0.115952	-4.42853	9.48794e-06	0.00159257	1.18054	181.576	27.8503	189.538	2.67066	2.95583	0.960257	0
IRS2	ENSG00000185950	8660	insulin receptor substrate 2 [Source:HGNC Symbol;Acc:HGNC:6126]	protein_coding	38.5019	-5.22274	1.18236	-0.0316065	0.119061	-4.41721	9.99821e-06	0.00164612	21.2497	60.5253	27.8503	189.132	5.34132	2.95583	0.960257	0
SMOX	ENSG00000088826	54498	spermine oxidase [Source:HGNC Symbol;Acc:HGNC:15862]	protein_coding	41.262	-5.5873	1.26545	-0.0281876	0.117676	-4.41526	1.00887e-05	0.00164612	15.347	111.367	11.6043	183.856	4.00599	2.95583	0.960257	0
NDUFB9	ENSG00000147684	4715	NADH:ubiquinone oxidoreductase subunit B9 [Source:HGNC Symbol;Acc:HGNC:7704]	protein_coding	2421.77	0.481205	0.109082	0.431092	0.114144	4.41139	1.0271e-05	0.00165637	1861.71	1778.23	2342.91	2099.94	2991.14	2828.73	2730.97	2740.51
ZNF490	ENSG00000188033	57474	zinc finger protein 490 [Source:HGNC Symbol;Acc:HGNC:23705]	protein_coding	58.0734	7.15074	1.62327	6.27864	1.79228	4.40514	1.05717e-05	0.00168527	1.18054	1.21051	1.16043	0	1.33533	322.186	0.960257	136.555
MLH3	ENSG00000119684	27030	mutL homolog 3 [Source:HGNC Symbol;Acc:HGNC:7128]	protein_coding	45.616	6.82405	1.55252	5.9901	1.70533	4.39548	1.1053e-05	0.00174198	1.18054	1.21051	1.16043	0	1.33533	2.95583	215.098	141.988
LAMTOR5	ENSG00000134248	10542	late endosomal/lysosomal adaptor, MAPK and MTOR activator 5 [Source:HGNC Symbol;Acc:HGNC:17955]	protein_coding	838.43	0.555697	0.127043	0.49704	0.133661	4.37408	1.21944e-05	0.00185947	571.38	656.094	776.328	709.449	1016.19	1002.03	1009.23	966.75
LHX9	ENSG00000143355	56956	LIM homeobox 9 [Source:HGNC Symbol;Acc:HGNC:14222]	protein_coding	22.3073	-5.57869	1.27436	-0.0317853	0.119116	-4.37765	1.19966e-05	0.00185947	12.9859	13.3156	58.0216	88.884	1.33533	2.95583	0.960257	0
SCN4A	ENSG00000007314	6329	sodium voltage-gated channel alpha subunit 4 [Source:HGNC Symbol;Acc:HGNC:10591]	protein_coding	33.9413	-6.12646	1.40066	-0.0247542	0.116444	-4.37397	1.22007e-05	0.00185947	131.04	44.7887	1.16043	89.2899	1.33533	2.95583	0.960257	0
ANKRD42	ENSG00000137494	338699	ankyrin repeat domain 42 [Source:HGNC Symbol;Acc:HGNC:26752]	protein_coding	159.799	-8.22838	1.88473	-0.0120484	0.113332	-4.36581	1.26652e-05	0.00189375	1.18054	835.249	8.12302	428.591	1.33533	2.95583	0.960257	0
CLHC1	ENSG00000162994	130162	clathrin heavy chain linker domain containing 1 [Source:HGNC Symbol;Acc:HGNC:26453]	protein_coding	60.7584	-3.82591	0.876842	-0.0490789	0.128953	-4.36329	1.28123e-05	0.00189375	27.1524	26.6311	280.824	120.541	6.67664	2.95583	14.4039	6.88208
FAM193B	ENSG00000146067	54540	family with sequence similarity 193 member B [Source:HGNC Symbol;Acc:HGNC:25524]	protein_coding	383.875	-1.36449	0.312749	-1.20477	0.335037	-4.36289	1.28353e-05	0.00189375	670.545	367.994	595.301	579.978	323.15	165.527	142.118	226.384
HOOK1	ENSG00000134709	51361	hook microtubule tethering protein 1 [Source:HGNC Symbol;Acc:HGNC:19884]	protein_coding	889.021	-0.487465	0.111971	-0.436495	0.117373	-4.35349	1.33984e-05	0.00193566	990.471	1130.61	980.564	1045.5	658.317	801.03	749	756.666
NBPF10	ENSG00000271425	100132406	NBPF member 10 [Source:HGNC Symbol;Acc:HGNC:31992]	protein_coding	942.434	-1.21111	0.278173	-1.07008	0.298284	-4.35379	1.33801e-05	0.00193566	1759	999.878	1129.1	1372.22	683.688	703.488	314.004	578.094
RGS20	ENSG00000147509	8601	regulator of G protein signaling 20 [Source:HGNC Symbol;Acc:HGNC:14600]	protein_coding	37.8587	3.7862	0.871473	3.32828	0.947766	4.3446	1.39531e-05	0.001995	1.18054	2.42101	12.7647	4.05863	41.3952	144.836	23.0462	73.1673
ARMH1	ENSG00000198520	339541	armadillo like helical domain containing 1 [Source:HGNC Symbol;Acc:HGNC:34345]	protein_coding	14.3371	7.4164	1.70979	8.03341	3.19006	4.3376	1.44046e-05	0.00203854	0	0	0	0	10.6826	59.1166	2.88077	42.0169
MFN1	ENSG00000171109	55669	mitofusin 1 [Source:HGNC Symbol;Acc:HGNC:18262]	protein_coding	439.913	-0.605804	0.139928	-0.538746	0.147988	-4.32941	1.49512e-05	0.00209452	526.52	574.991	481.579	536.551	340.509	384.258	313.044	361.852
SUB1	ENSG00000113387	10923	SUB1 regulator of transcription [Source:HGNC Symbol;Acc:HGNC:19985]	protein_coding	3311.3	0.545358	0.126199	0.486373	0.132898	4.3214	1.55041e-05	0.00215026	2506.28	2233.38	3245.73	2786.25	4262.37	3691.83	3937.05	3827.52
MBD5	ENSG00000204406	55777	methyl-CpG binding domain protein 5 [Source:HGNC Symbol;Acc:HGNC:20444]	protein_coding	213.48	-1.42346	0.330103	-1.25119	0.354689	-4.31217	1.61658e-05	0.00221983	292.773	428.519	197.273	326.314	74.7784	118.233	147.88	122.066
NEK10	ENSG00000163491	152110	NIMA related kinase 10 [Source:HGNC Symbol;Acc:HGNC:18592]	protein_coding	34.7237	-6.14811	1.42776	-0.0234404	0.116017	-4.30611	1.66148e-05	0.00225912	141.664	27.8416	1.16043	101.872	1.33533	2.95583	0.960257	0
OCA2	ENSG00000104044	4948	OCA2 melanosomal transmembrane protein [Source:HGNC Symbol;Acc:HGNC:8101]	protein_coding	40.3201	-6.34395	1.48094	-0.021388	0.115403	-4.28372	1.83793e-05	0.00247479	14.1664	204.576	1.16043	97.4071	1.33533	2.95583	0.960257	0
RPS12	ENSG00000112306	6206	ribosomal protein S12 [Source:HGNC Symbol;Acc:HGNC:10385]	protein_coding	15028.6	0.474231	0.110764	0.426047	0.116021	4.28145	1.85682e-05	0.00247618	10941.2	11304.9	15098.4	12977.1	18836.1	16863	17150.2	17057.8
MED7	ENSG00000155868	9443	mediator complex subunit 7 [Source:HGNC Symbol;Acc:HGNC:2378]	protein_coding	144.609	-1.29402	0.3024	-1.13546	0.325002	-4.27915	1.87611e-05	0.00247807	195.969	283.258	134.61	208.614	77.4491	82.7633	85.4629	88.7426
TFEB	ENSG00000112561	7942	transcription factor EB [Source:HGNC Symbol;Acc:HGNC:11753]	protein_coding	65.7951	-6.62044	1.55682	-0.0181438	0.114553	-4.25253	2.11366e-05	0.00276551	350.62	1.21051	2.32086	165.998	1.33533	2.95583	1.92051	0
PSMB7	ENSG00000136930	5695	proteasome 20S subunit beta 7 [Source:HGNC Symbol;Acc:HGNC:9544]	protein_coding	1866.62	0.549574	0.12944	0.487809	0.136595	4.24578	2.17832e-05	0.00282347	1334.01	1504.66	1661.74	1566.63	2550.48	1829.66	2313.26	2172.56
ACTRT3	ENSG00000184378	84517	actin related protein T3 [Source:HGNC Symbol;Acc:HGNC:24022]	protein_coding	44.4742	-6.47038	1.52562	-0.0198419	0.114978	-4.24114	2.22383e-05	0.00283667	238.469	1.21051	6.96259	103.901	1.33533	2.95583	0.960257	0
SLC2A10	ENSG00000197496	81031	solute carrier family 2 member 10 [Source:HGNC Symbol;Acc:HGNC:13444]	protein_coding	38.3106	-5.80813	1.36965	-0.0242035	0.116259	-4.24058	2.22941e-05	0.00283667	93.2624	50.8413	1.16043	154.634	2.67066	2.95583	0.960257	0
BMS1	ENSG00000165733	9790	BMS1 ribosome biogenesis factor [Source:HGNC Symbol;Acc:HGNC:23505]	protein_coding	1508.83	-0.518782	0.122426	-0.460226	0.128925	-4.2375	2.26026e-05	0.00284977	1738.93	2032.44	1542.21	1804.06	1339.33	1078.88	1274.26	1260.51
FSD1	ENSG00000105255	79187	fibronectin type III and SPRY domain containing 1 [Source:HGNC Symbol;Acc:HGNC:13745]	protein_coding	407.646	0.686589	0.162186	0.605549	0.172665	4.23333	2.30257e-05	0.00287696	244.371	332.889	341.167	328.343	502.084	532.05	494.532	485.73
MCIDAS	ENSG00000234602	345643	multiciliate differentiation and DNA synthesis associated cell cycle protein [Source:HGNC Symbol;Acc:HGNC:40050]	protein_coding	40.4346	-6.34114	1.49876	-0.0207118	0.115212	-4.23093	2.32727e-05	0.00288187	10.6248	205.786	1.16043	100.654	1.33533	2.95583	0.960257	0
ATOX1	ENSG00000177556	475	antioxidant 1 copper chaperone [Source:HGNC Symbol;Acc:HGNC:798]	protein_coding	383.182	0.721639	0.170667	0.636065	0.181914	4.22836	2.35405e-05	0.00288923	244.371	262.68	343.488	304.803	526.12	472.933	456.122	454.941
LRRC37A	ENSG00000176681	9884	leucine rich repeat containing 37A [Source:HGNC Symbol;Acc:HGNC:29069]	protein_coding	214.833	-1.58456	0.375283	-1.38424	0.403966	-4.2223	2.4182e-05	0.00294193	389.577	219.102	345.808	340.113	108.162	44.3375	160.363	111.2
FADS1	ENSG00000149485	3992	fatty acid desaturase 1 [Source:HGNC Symbol;Acc:HGNC:3574]	protein_coding	1430.49	-0.327556	0.0777755	-0.295633	0.0801871	-4.21155	2.5362e-05	0.00305865	1540.6	1624.5	1609.52	1595.04	1340.67	1250.32	1200.32	1282.96
MPG	ENSG00000103152	4350	N-methylpurine DNA glycosylase [Source:HGNC Symbol;Acc:HGNC:7211]	protein_coding	673.954	0.674606	0.160289	0.594149	0.170697	4.2087	2.56849e-05	0.0030709	428.535	467.255	638.237	540.61	893.335	836.5	790.291	796.872
SHPK	ENSG00000197417	23729	sedoheptulokinase [Source:HGNC Symbol;Acc:HGNC:1492]	protein_coding	82.7092	6.60361	1.57005	5.71138	1.77732	4.20598	2.59958e-05	0.0030815	1.18054	1.21051	4.64172	0	1.33533	478.845	0.960257	173.501
SFT2D1	ENSG00000198818	113402	SFT2 domain containing 1 [Source:HGNC Symbol;Acc:HGNC:21102]	protein_coding	885.833	0.461105	0.109907	0.410328	0.115366	4.19541	2.72376e-05	0.00320134	756.724	689.989	757.762	773.981	1147.05	1016.81	946.813	997.539
NCS1	ENSG00000107130	23413	neuronal calcium sensor 1 [Source:HGNC Symbol;Acc:HGNC:3953]	protein_coding	615.223	-1.15406	0.275594	-1.00465	0.297762	-4.18753	2.82013e-05	0.00328675	800.404	1191.14	505.948	893.71	321.814	493.624	326.487	388.656
EXTL2	ENSG00000162694	2135	exostosin like glycosyltransferase 2 [Source:HGNC Symbol;Acc:HGNC:3516]	protein_coding	413.309	0.8201	0.196067	0.718497	0.21007	4.18275	2.88003e-05	0.00329422	310.481	223.944	353.931	307.238	618.257	493.624	470.526	528.471
MRPL27	ENSG00000108826	51264	mitochondrial ribosomal protein L27 [Source:HGNC Symbol;Acc:HGNC:14483]	protein_coding	802.319	0.644838	0.154218	0.567417	0.164252	4.18135	2.8978e-05	0.00329422	692.975	497.518	661.446	646.946	1040.22	1078.88	842.145	958.42
RPS23	ENSG00000186468	6228	ribosomal protein S23 [Source:HGNC Symbol;Acc:HGNC:10410]	protein_coding	17929.3	0.559374	0.133739	0.494014	0.141627	4.18259	2.88203e-05	0.00329422	12039.1	12816.8	18253.6	14876.1	23915.7	20135.1	20490	20907.7
AJM1	ENSG00000232434	389813	apical junction component 1 homolog [Source:HGNC Symbol;Acc:HGNC:37284]	protein_coding	19.6897	5.65248	1.35406	4.87592	1.48466	4.17446	2.98693e-05	0.00329857	1.18054	1.21051	1.16043	0	2.67066	26.6025	46.0923	78.6005
CD82	ENSG00000085117	3732	CD82 molecule [Source:HGNC Symbol;Acc:HGNC:6210]	protein_coding	33.7499	-6.09249	1.45901	-0.0220545	0.115589	-4.17578	2.96963e-05	0.00329857	17.7081	151.313	1.16043	94.5661	1.33533	2.95583	0.960257	0
KRTDAP	ENSG00000188508	388533	keratinocyte differentiation associated protein [Source:HGNC Symbol;Acc:HGNC:16313]	protein_coding	10.6009	6.22716	1.49199	5.38181	1.83599	4.17371	2.99675e-05	0.00329857	0	1.21051	0	0	12.018	14.7792	11.5231	45.2768
TPGS1	ENSG00000141933	91978	tubulin polyglutamylase complex subunit 1 [Source:HGNC Symbol;Acc:HGNC:25058]	protein_coding	119.256	0.97619	0.233862	0.852967	0.251228	4.17422	2.9901e-05	0.00329857	68.4712	81.1039	84.7115	86.8547	170.922	144.836	169.005	148.146
RSPH10B	ENSG00000155026	222967	radial spoke head 10 homolog B [Source:HGNC Symbol;Acc:HGNC:27362]	protein_coding	9.32766	-5.75537	1.38	-0.032276	0.119289	-4.17057	3.03834e-05	0.00331801	21.2497	12.1051	13.9252	26.3811	0	0	0.960257	0
MED14	ENSG00000180182	9282	mediator complex subunit 14 [Source:HGNC Symbol;Acc:HGNC:2370]	protein_coding	952.561	-0.783357	0.187959	-0.684936	0.201537	-4.16771	3.07675e-05	0.00333371	1035.33	1284.35	1269.51	1224.89	484.724	866.058	738.438	717.185
PAG1	ENSG00000076641	55824	phosphoprotein membrane anchor with glycosphingolipid microdomains 1 [Source:HGNC Symbol;Acc:HGNC:30043]	protein_coding	63.1707	-5.53871	1.33079	-0.022986	0.115878	-4.16198	3.15498e-05	0.00339197	92.0819	118.63	1.16043	282.481	1.33533	2.95583	6.7218	0
HEY2	ENSG00000135547	23493	hes related family bHLH transcription factor with YRPW motif 2 [Source:HGNC Symbol;Acc:HGNC:4881]	protein_coding	100.682	7.91583	1.90452	6.801	2.18514	4.15635	3.23375e-05	0.00344991	1.18054	1.21051	1.16043	0	608.91	2.95583	0.960257	189.076
ENPP5	ENSG00000112796	59084	ectonucleotide pyrophosphatase/phosphodiesterase family member 5 [Source:HGNC Symbol;Acc:HGNC:13717]	protein_coding	27.0909	-5.79814	1.3971	-0.0245307	0.116353	-4.15014	3.32275e-05	0.00351781	1.18054	65.3673	48.7381	96.1895	1.33533	2.95583	0.960257	0
MDN1	ENSG00000112159	23195	midasin AAA ATPase 1 [Source:HGNC Symbol;Acc:HGNC:18302]	protein_coding	1474.65	-0.372751	0.0898731	-0.333117	0.0935004	-4.14753	3.36082e-05	0.00353116	1763.72	1596.66	1604.88	1680.27	1257.88	1404.02	1189.76	1299.99
FLCN	ENSG00000154803	201163	folliculin [Source:HGNC Symbol;Acc:HGNC:27310]	protein_coding	454.719	-0.868057	0.209916	-0.754879	0.225971	-4.13526	3.54556e-05	0.00364247	436.799	728.725	587.178	595.401	257.718	363.567	335.13	333.237
SLC35A1	ENSG00000164414	10559	solute carrier family 35 member A1 [Source:HGNC Symbol;Acc:HGNC:11021]	protein_coding	122.687	-7.84284	1.89595	-0.0118272	0.113295	-4.13663	3.52448e-05	0.00364247	4.72215	703.304	1.16043	267.058	1.33533	2.95583	0.960257	0
SSTR2	ENSG00000180616	6752	somatostatin receptor 2 [Source:HGNC Symbol;Acc:HGNC:11331]	protein_coding	33.6698	-5.69705	1.37707	-0.0240424	0.1162	-4.13709	3.51742e-05	0.00364247	95.6235	1.21051	34.8129	131.5	1.33533	2.95583	1.92051	0
CARNMT1	ENSG00000156017	138199	carnosine N-methyltransferase 1 [Source:HGNC Symbol;Acc:HGNC:23435]	protein_coding	324.591	-0.773275	0.187562	-0.674402	0.200947	-4.12278	3.74331e-05	0.00376203	348.258	430.94	454.889	409.11	283.09	195.085	224.7	250.652
CEP63	ENSG00000182923	80254	centrosomal protein 63 [Source:HGNC Symbol;Acc:HGNC:25815]	protein_coding	63.3998	-6.14791	1.49024	-0.019054	0.114774	-4.12545	3.70016e-05	0.00376203	1.18054	340.152	6.96259	150.981	4.00599	2.95583	0.960257	0
PFDN4	ENSG00000101132	5203	prefoldin subunit 4 [Source:HGNC Symbol;Acc:HGNC:8868]	protein_coding	1141.14	0.548161	0.132945	0.482283	0.140978	4.12323	3.7359e-05	0.00376203	768.53	878.828	1093.13	963.925	1428.8	1386.28	1294.43	1315.2
FOXRED2	ENSG00000100350	80020	FAD dependent oxidoreductase domain containing 2 [Source:HGNC Symbol;Acc:HGNC:26264]	protein_coding	1564.04	-0.428593	0.104206	-0.379515	0.109246	-4.11294	3.90649e-05	0.00389778	1736.57	1894.44	1731.36	1815.02	1143.04	1392.2	1451.91	1347.8
ITGB3BP	ENSG00000142856	23421	integrin subunit beta 3 binding protein [Source:HGNC Symbol;Acc:HGNC:6157]	protein_coding	1595.45	0.515565	0.125766	0.453625	0.133123	4.0994	4.14225e-05	0.00407439	1158.11	1166.93	1561.94	1362.48	1984.3	1933.11	1772.63	1824.11
KIFAP3	ENSG00000075945	22920	kinesin associated protein 3 [Source:HGNC Symbol;Acc:HGNC:17060]	protein_coding	353.966	-0.600172	0.146366	-0.525443	0.15568	-4.10048	4.12296e-05	0.00407439	441.521	453.94	388.744	426.968	267.066	257.157	307.282	289.047
CTPS2	ENSG00000047230	56474	CTP synthase 2 [Source:HGNC Symbol;Acc:HGNC:2520]	protein_coding	442.045	-0.596468	0.146231	-0.521127	0.155921	-4.07894	4.5241e-05	0.00438774	593.81	524.149	469.975	538.986	369.886	363.567	313.044	362.939
ZNF100	ENSG00000197020	163227	zinc finger protein 100 [Source:HGNC Symbol;Acc:HGNC:12880]	protein_coding	196.374	-1.01899	0.249745	-0.881842	0.270565	-4.08012	4.50133e-05	0.00438774	317.565	185.207	283.145	264.623	130.862	141.88	110.43	137.279
CREG2	ENSG00000175874	200407	cellular repressor of E1A stimulated genes 2 [Source:HGNC Symbol;Acc:HGNC:14272]	protein_coding	25.9722	-5.73037	1.40721	-0.0239439	0.116157	-4.07215	4.6582e-05	0.00448642	87.3598	1.21051	34.8129	79.1433	1.33533	2.95583	0.960257	0
CDH23	ENSG00000107736	64072	cadherin related 23 [Source:HGNC Symbol;Acc:HGNC:13733]	protein_coding	85.9846	-5.90555	1.45153	-0.0188966	0.114734	-4.0685	4.73177e-05	0.00449485	1.18054	409.151	12.7647	252.853	8.01197	2.95583	0.960257	0
RPL37A	ENSG00000197756	6168	ribosomal protein L37a [Source:HGNC Symbol;Acc:HGNC:10348]	protein_coding	15659.9	0.523148	0.128572	0.458194	0.136353	4.0689	4.72362e-05	0.00449485	10059.4	12232.2	15944.3	13169	19137.9	17977.4	18675.1	18083.6
BLOC1S5	ENSG00000188428	63915	biogenesis of lysosomal organelles complex 1 subunit 5 [Source:HGNC Symbol;Acc:HGNC:18561]	protein_coding	288.593	-0.79083	0.194559	-0.686026	0.208855	-4.06474	4.80865e-05	0.00453682	338.814	370.415	395.707	366.088	213.653	153.703	251.587	218.778
NDUFA1	ENSG00000125356	4694	NADH:ubiquinone oxidoreductase subunit A1 [Source:HGNC Symbol;Acc:HGNC:7683]	protein_coding	1949.76	0.557427	0.137231	0.487751	0.145966	4.06197	4.86603e-05	0.00455993	1483.94	1296.45	1879.9	1646.99	2591.87	2352.84	2114.49	2231.6
IKZF5	ENSG00000095574	64376	IKAROS family zinc finger 5 [Source:HGNC Symbol;Acc:HGNC:14283]	protein_coding	385.644	-0.795266	0.1959	-0.68871	0.211542	-4.05956	4.91658e-05	0.00457638	515.895	455.15	483.9	495.965	296.443	342.876	202.614	292.307
RPS7	ENSG00000171863	6201	ribosomal protein S7 [Source:HGNC Symbol;Acc:HGNC:10440]	protein_coding	16583.6	0.522571	0.128821	0.457193	0.13668	4.05658	4.97974e-05	0.00460427	11546.8	12053	16904	13944.6	21824.6	19345.9	17867.5	19182.5
ZNF512	ENSG00000243943	84450	zinc finger protein 512 [Source:HGNC Symbol;Acc:HGNC:29380]	protein_coding	444.645	-0.546904	0.134895	-0.478209	0.143233	-4.05428	5.02893e-05	0.00461896	569.019	541.096	475.777	530.463	344.515	336.965	389.864	369.459
OLFML2B	ENSG00000162745	25903	olfactomedin like 2B [Source:HGNC Symbol;Acc:HGNC:24558]	protein_coding	21.7638	-5.49439	1.35696	-0.026094	0.116866	-4.04904	5.14273e-05	0.00468797	20.0691	67.7884	3.48129	77.5198	1.33533	2.95583	0.960257	0
STAB1	ENSG00000010327	23166	stabilin 1 [Source:HGNC Symbol;Acc:HGNC:18628]	protein_coding	35.4773	-6.14287	1.51761	-0.0198832	0.11498	-4.04773	5.17167e-05	0.00468797	165.275	1.21051	6.96259	105.119	1.33533	2.95583	0.960257	0
SOX21	ENSG00000125285	11166	SRY-box transcription factor 21 [Source:HGNC Symbol;Acc:HGNC:11197]	protein_coding	55.0255	-2.59199	0.641048	-0.0841056	0.166066	-4.04336	5.26901e-05	0.00474519	90.9014	156.155	29.0108	101.466	6.67664	17.735	23.0462	15.213
PRKAG2	ENSG00000106617	51422	protein kinase AMP-activated non-catalytic subunit gamma 2 [Source:HGNC Symbol;Acc:HGNC:9386]	protein_coding	127.793	-1.07237	0.266728	-0.921962	0.290078	-4.02047	5.8082e-05	0.00519703	138.123	211.839	167.102	175.333	65.4311	91.6308	84.5026	88.3803
ZNF506	ENSG00000081665	440515	zinc finger protein 506 [Source:HGNC Symbol;Acc:HGNC:23780]	protein_coding	12.3626	5.6354	1.40348	4.71205	1.57125	4.0153	5.93699e-05	0.00527821	1.18054	1.21051	0	0	18.6946	35.47	5.76154	36.5837
PRELID3A	ENSG00000141391	10650	PRELI domain containing 3A [Source:HGNC Symbol;Acc:HGNC:24639]	protein_coding	54.1602	-2.75967	0.688311	-0.0705887	0.148195	-4.00934	6.08886e-05	0.00534471	160.553	55.6833	53.3798	105.119	16.0239	26.6025	2.88077	13.0397
TMEM258	ENSG00000134825	746	transmembrane protein 258 [Source:HGNC Symbol;Acc:HGNC:1164]	protein_coding	1365.86	0.754441	0.188163	0.651844	0.202996	4.00951	6.08452e-05	0.00534471	694.156	1056.77	1271.83	1041.04	1817.38	1876.95	1482.64	1686.11
YPEL5	ENSG00000119801	51646	yippee like 5 [Source:HGNC Symbol;Acc:HGNC:18329]	protein_coding	510.006	0.666838	0.166616	0.577722	0.179192	4.00225	6.27442e-05	0.00547295	328.189	429.73	407.311	405.863	540.808	756.693	601.121	610.331
EXOC1L	ENSG00000250821	644145	exocyst complex component 1 like [Source:HGNC Symbol;Acc:HGNC:53433]	protein_coding	32.4206	2.80257	0.700657	2.39397	0.77395	3.99992	6.3364e-05	0.00548643	3.54161	2.42101	19.7273	6.89967	50.7425	65.0283	53.7744	57.2299
RPS24	ENSG00000138326	6229	ribosomal protein S24 [Source:HGNC Symbol;Acc:HGNC:10411]	protein_coding	20692.9	0.40487	0.101287	0.357155	0.106184	3.99724	6.40855e-05	0.00548643	16029.3	15783.8	21174.4	18242.3	24357.7	23726.5	23097.1	23132.1
TMEM43	ENSG00000170876	79188	transmembrane protein 43 [Source:HGNC Symbol;Acc:HGNC:28472]	protein_coding	890.738	-0.426166	0.106586	-0.375843	0.112058	-3.99833	6.37913e-05	0.00548643	1040.05	1108.82	902.815	1033.73	773.155	759.649	736.517	771.155
TMEM65	ENSG00000164983	157378	transmembrane protein 65 [Source:HGNC Symbol;Acc:HGNC:25203]	protein_coding	609.484	-0.655394	0.164053	-0.567053	0.176177	-3.99502	6.46881e-05	0.00550221	842.904	738.409	642.879	758.558	379.233	490.668	539.664	483.556
ZNF385C	ENSG00000187595	201181	zinc finger protein 385C [Source:HGNC Symbol;Acc:HGNC:33722]	protein_coding	47.3411	1.78759	0.447608	1.53032	0.490403	3.99365	6.50633e-05	0.00550221	9.4443	22.9996	29.0108	23.1342	65.4311	79.8074	76.8206	72.0807
RPL24	ENSG00000114391	6152	ribosomal protein L24 [Source:HGNC Symbol;Acc:HGNC:10325]	protein_coding	23274	0.535402	0.134112	0.466911	0.14276	3.99219	6.54651e-05	0.00550264	15513.4	16988.2	24070.8	19445.3	30374.7	25869.4	26934.2	26995.8
TRIM6	ENSG00000121236	117854	tripartite motif containing 6 [Source:HGNC Symbol;Acc:HGNC:16277]	protein_coding	81.2626	-2.43511	0.612376	-0.0883842	0.172659	-3.9765	6.99362e-05	0.00584305	29.5134	150.103	221.642	146.517	32.0479	29.5583	15.3641	25.355
	ENSG00000285130		novel protein	protein_coding	18.7811	-5.94939	1.49738	-0.0229947	0.115864	-3.97319	7.09168e-05	0.00588949	1.18054	31.4732	48.7381	66.5615	1.33533	0	0.960257	0
EEF1B2	ENSG00000114942	1933	eukaryotic translation elongation factor 1 beta 2 [Source:HGNC Symbol;Acc:HGNC:3208]	protein_coding	7961.34	0.435274	0.109632	0.382277	0.115511	3.97032	7.17751e-05	0.00592529	6034.91	6435.05	7660.01	6942.29	10314.1	9387.72	7919.24	8997.41
DHRS12	ENSG00000102796	79758	dehydrogenase/reductase 12 [Source:HGNC Symbol;Acc:HGNC:25832]	protein_coding	28.7302	6.133	1.54827	5.16674	1.75896	3.96118	7.45791e-05	0.00612034	1.18054	1.21051	1.16043	0	5.34132	153.703	0.960257	66.2853
PUDP	ENSG00000130021	8226	pseudouridine 5'-phosphatase [Source:HGNC Symbol;Acc:HGNC:16818]	protein_coding	163.175	-1.13024	0.286229	-0.962688	0.314423	-3.94872	7.85706e-05	0.00640997	185.344	206.997	272.701	226.066	81.4551	144.836	79.7013	108.302
EMX2	ENSG00000170370	2018	empty spiracles homeobox 2 [Source:HGNC Symbol;Acc:HGNC:3341]	protein_coding	46.9549	2.25125	0.571851	1.9146	0.630549	3.93679	8.25804e-05	0.0066977	25.9718	13.3156	9.28345	17.0462	46.7365	50.2491	134.436	78.6005
TAF1D	ENSG00000166012	79101	TATA-box binding protein associated factor, RNA polymerase I subunit D [Source:HGNC Symbol;Acc:HGNC:28759]	protein_coding	1790.64	0.591724	0.150775	0.510922	0.161827	3.92454	8.6895e-05	0.00700667	1338.73	1174.19	1730.2	1465.17	2279.41	2409	1812	2116.42
CCDC17	ENSG00000159588	149483	coiled-coil domain containing 17 [Source:HGNC Symbol;Acc:HGNC:26574]	protein_coding	10.8827	-5.94618	1.51614	-0.0237097	0.11606	-3.92192	8.78448e-05	0.00704231	25.9718	14.5261	4.64172	40.5863	1.33533	0	0	0
SLC27A6	ENSG00000113396	28965	solute carrier family 27 member 6 [Source:HGNC Symbol;Acc:HGNC:11000]	protein_coding	36.027	-2.78147	0.711035	-0.067729	0.14496	-3.91185	9.159e-05	0.00730035	12.9859	79.8934	92.8345	65.3439	6.67664	11.8233	9.60257	9.05536
SNAI2	ENSG00000019549	6591	snail family transcriptional repressor 2 [Source:HGNC Symbol;Acc:HGNC:11094]	protein_coding	458.055	-0.707646	0.180996	-0.606614	0.195487	-3.90974	9.23943e-05	0.00732238	563.116	545.938	598.782	571.861	437.988	260.113	328.408	358.23
HSBP1	ENSG00000230989	3281	heat shock factor binding protein 1 [Source:HGNC Symbol;Acc:HGNC:5203]	protein_coding	1828.04	0.434195	0.111289	0.378805	0.117453	3.9015	9.55989e-05	0.0075333	1481.57	1386.03	1751.09	1605.59	2235.34	1879.91	2233.56	2051.22
FAM214B	ENSG00000005238	80256	family with sequence similarity 214 member B [Source:HGNC Symbol;Acc:HGNC:25666]	protein_coding	72.0199	2.14638	0.550472	1.8171	0.609529	3.89916	9.65273e-05	0.00756349	22.4302	18.1576	39.4547	26.787	64.0958	62.0725	221.819	121.342
ZNF605	ENSG00000196458	100289635	zinc finger protein 605 [Source:HGNC Symbol;Acc:HGNC:28068]	protein_coding	160.69	-0.975572	0.250319	-0.828933	0.274181	-3.89731	9.72677e-05	0.00757869	254.996	222.733	158.979	213.89	92.1377	124.145	105.628	113.011
GAS2L3	ENSG00000139354	283431	growth arrest specific 2 like 3 [Source:HGNC Symbol;Acc:HGNC:27475]	protein_coding	237.331	0.96941	0.249051	0.824731	0.272642	3.89241	9.92528e-05	0.00760517	115.693	220.312	136.931	167.621	300.449	345.832	302.481	309.331
RPS25	ENSG00000118181	6230	ribosomal protein S25 [Source:HGNC Symbol;Acc:HGNC:10413]	protein_coding	12606.5	0.595659	0.152929	0.503727	0.164877	3.89501	9.81946e-05	0.00760517	8259.04	8643.02	13053.7	10205	17671.7	14616.6	13460.9	14941.7
SPATA2	ENSG00000158480	9825	spermatogenesis associated 2 [Source:HGNC Symbol;Acc:HGNC:14681]	protein_coding	192.21	-1.86613	0.47929	-1.57413	0.532404	-3.89353	9.87978e-05	0.00760517	538.325	122.261	217.001	327.937	46.7365	103.454	100.827	81.136
RB1	ENSG00000139687	5925	RB transcriptional corepressor 1 [Source:HGNC Symbol;Acc:HGNC:9884]	protein_coding	608.235	0.864428	0.222702	0.736306	0.242985	3.88155	0.000103792	0.00786605	371.869	430.94	480.418	443.202	546.149	741.914	1069.73	781.659
SSC5D	ENSG00000179954	284297	scavenger receptor cysteine rich family member with 5 domains [Source:HGNC Symbol;Acc:HGNC:26641]	protein_coding	16.9909	-5.80242	1.49468	-0.0229417	0.11584	-3.88206	0.000103575	0.00786605	38.9577	41.1572	1.16043	52.3563	1.33533	0	0.960257	0
OGFOD2	ENSG00000111325	79676	2-oxoglutarate and iron dependent oxygenase domain containing 2 [Source:HGNC Symbol;Acc:HGNC:25823]	protein_coding	46.9438	2.01785	0.520626	1.7008	0.57929	3.87582	0.000106268	0.00800993	16.5275	26.6311	10.4439	19.8873	41.3952	118.233	68.1782	74.254
CPQ	ENSG00000104324	10404	carboxypeptidase Q [Source:HGNC Symbol;Acc:HGNC:16910]	protein_coding	19.9685	-3.98946	1.03057	-0.0380002	0.121941	-3.87111	0.000108342	0.0080353	15.347	52.0518	34.8129	45.0508	1.33533	8.86749	1.92051	0.362214
EGFL8	ENSG00000241404	80864	EGF like domain multiple 8 [Source:HGNC Symbol;Acc:HGNC:13944]	protein_coding	17.442	-5.82418	1.50436	-0.0220605	0.115558	-3.87154	0.00010815	0.0080353	47.2215	4.84203	9.28345	74.2729	0	2.95583	0.960257	0
RPA2	ENSG00000117748	6118	replication protein A2 [Source:HGNC Symbol;Acc:HGNC:10290]	protein_coding	1850.39	-0.509984	0.13166	-0.44013	0.140557	-3.8735	0.000107284	0.0080353	1900.66	2655.85	1919.35	2216.42	1487.56	1628.66	1451.91	1542.67
MARS1	ENSG00000166986	4141	methionyl-tRNA synthetase 1 [Source:HGNC Symbol;Acc:HGNC:6898]	protein_coding	2587.71	-0.387862	0.100269	-0.339316	0.105143	-3.8682	0.000109641	0.00808837	2727.04	3164.26	2887.15	2968.89	2193.95	1974.5	2526.44	2259.49
ZBTB20	ENSG00000181722	26137	zinc finger and BTB domain containing 20 [Source:HGNC Symbol;Acc:HGNC:13503]	protein_coding	20.097	-5.91842	1.53071	-0.0208317	0.115213	-3.86645	0.000110429	0.00810342	2.36107	16.9471	74.2676	62.9088	1.33533	2.95583	0	0
RPS27	ENSG00000177954	6232	ribosomal protein S27 [Source:HGNC Symbol;Acc:HGNC:10416]	protein_coding	17510	0.551722	0.142794	0.478732	0.15288	3.86375	0.000111658	0.00811059	12616.4	11663.2	18070.2	14458.5	24031.9	19824.8	18825.8	20589.4
TUBG1	ENSG00000131462	7283	tubulin gamma 1 [Source:HGNC Symbol;Acc:HGNC:12417]	protein_coding	2322.2	-0.304627	0.0788441	-0.270303	0.0814378	-3.86367	0.000111697	0.00811059	2428.36	2681.27	2545.99	2596.71	2029.7	2258.25	1942.6	2094.69
HNRNPH3	ENSG00000096746	3189	heterogeneous nuclear ribonucleoprotein H3 [Source:HGNC Symbol;Acc:HGNC:5043]	protein_coding	3104.99	0.308025	0.0798751	0.273206	0.0825286	3.85633	0.000115101	0.00831427	2451.98	2881.01	2935.89	2827.24	3395.74	3470.15	3482.85	3395.04
NKX3-2	ENSG00000109705	579	NK3 homeobox 2 [Source:HGNC Symbol;Acc:HGNC:951]	protein_coding	40.5764	-6.29902	1.63405	-0.0164981	0.114161	-3.85485	0.000115802	0.00832157	1.18054	1.21051	230.926	86.043	1.33533	2.95583	0.960257	0
ZNF423	ENSG00000102935	23090	zinc finger protein 423 [Source:HGNC Symbol;Acc:HGNC:16762]	protein_coding	32.4408	-5.34104	1.38757	-0.0222461	0.115623	-3.84922	0.000118497	0.0084713	1.18054	65.3673	63.8237	120.947	1.33533	5.91166	0.960257	0
ATP5ME	ENSG00000169020	521	ATP synthase membrane subunit e [Source:HGNC Symbol;Acc:HGNC:846]	protein_coding	1433.28	0.793636	0.20665	0.675003	0.225461	3.84049	0.000122789	0.00873315	965.679	743.251	1416.89	1070.26	2215.31	1551.81	1711.18	1791.88
AMY2B	ENSG00000240038	280	amylase alpha 2B [Source:HGNC Symbol;Acc:HGNC:478]	protein_coding	26.5836	-5.72907	1.49587	-0.0202629	0.115066	-3.82991	0.000128188	0.00896599	1.18054	9.68405	80.0697	116.483	1.33533	2.95583	0.960257	0
ANKRD34B	ENSG00000189127	340120	ankyrin repeat domain 34B [Source:HGNC Symbol;Acc:HGNC:33736]	protein_coding	87.7179	2.32686	0.607116	1.9507	0.681266	3.83265	0.000126771	0.00896599	7.08322	44.7887	37.1338	27.1928	137.539	236.466	60.4962	151.043
LIN37	ENSG00000267796	55957	lin-37 DREAM MuvB core complex component [Source:HGNC Symbol;Acc:HGNC:33234]	protein_coding	75.5892	-5.99999	1.56719	-0.0162002	0.114097	-3.82852	0.000128918	0.00896599	341.175	2.42101	1.16043	248.794	1.33533	8.86749	0.960257	0
LINS1	ENSG00000140471	55180	lines homolog 1 [Source:HGNC Symbol;Acc:HGNC:30922]	protein_coding	250.216	-1.10392	0.288301	-0.929747	0.317734	-3.82906	0.000128632	0.00896599	217.219	384.941	417.755	348.23	118.844	147.792	200.694	166.256
NKX2-2	ENSG00000125820	4821	NK2 homeobox 2 [Source:HGNC Symbol;Acc:HGNC:7835]	protein_coding	26.7515	-5.73473	1.49818	-0.0201946	0.115048	-3.8278	0.000129295	0.00896599	122.776	1.21051	9.28345	75.4905	1.33533	2.95583	0.960257	0
USF3	ENSG00000176542	205717	upstream transcription factor family member 3 [Source:HGNC Symbol;Acc:HGNC:30494]	protein_coding	334.445	0.64534	0.168982	0.549928	0.182859	3.819	0.000133995	0.00924567	221.941	295.364	256.455	271.522	423.299	360.611	452.281	394.089
ATP5MK	ENSG00000173915	84833	ATP synthase membrane subunit k [Source:HGNC Symbol;Acc:HGNC:30889]	protein_coding	1245.91	0.582013	0.152627	0.497486	0.164619	3.81331	0.000137116	0.00941419	845.265	875.196	1242.82	1024.4	1354.02	1655.27	1509.52	1460.81
SAP18	ENSG00000150459	10284	Sin3A associated protein 18 [Source:HGNC Symbol;Acc:HGNC:10530]	protein_coding	1490.5	0.6233	0.163514	0.531133	0.17698	3.8119	0.000137901	0.00942144	905.472	1089.46	1493.47	1202.98	1964.27	1868.09	1636.28	1763.98
KHDC1	ENSG00000135314	80759	KH domain containing 1 [Source:HGNC Symbol;Acc:HGNC:21366]	protein_coding	7.96555	-6.30852	1.65688	-0.0197239	0.114916	-3.80747	0.000140396	0.00954484	14.1664	22.9996	4.64172	21.9166	0	0	0	0
DNAI3	ENSG00000162643	126820	dynein axonemal intermediate chain 3 [Source:HGNC Symbol;Acc:HGNC:30711]	protein_coding	28.1649	-5.79941	1.52592	-0.0193034	0.114816	-3.80061	0.000144341	0.00974844	146.387	2.42101	3.48129	67.7791	1.33533	2.95583	0.960257	0
RPL3L	ENSG00000140986	6123	ribosomal protein L3 like [Source:HGNC Symbol;Acc:HGNC:10351]	protein_coding	12.7615	5.67908	1.49456	4.63807	1.70709	3.79983	0.000144796	0.00974844	1.18054	0	1.16043	0	4.00599	17.735	18.2449	59.7654
RPL39	ENSG00000198918	6170	ribosomal protein L39 [Source:HGNC Symbol;Acc:HGNC:10350]	protein_coding	35279.7	0.518007	0.136415	0.434207	0.146637	3.79728	0.000146291	0.00980147	25761.7	23264.7	37517.9	29508.3	43258	40447.6	41508.1	40971.2
CCND1	ENSG00000110092	595	cyclin D1 [Source:HGNC Symbol;Acc:HGNC:1582]	protein_coding	313.132	-0.725855	0.191601	-0.613032	0.20944	-3.78837	0.000151641	0.0101111	415.549	403.099	349.29	390.034	268.401	257.157	179.568	241.959
SNRPG	ENSG00000143977	6637	small nuclear ribonucleoprotein polypeptide G [Source:HGNC Symbol;Acc:HGNC:11163]	protein_coding	1826.58	0.539536	0.142576	0.461526	0.153318	3.78419	0.00015421	0.0102332	1384.77	1205.66	1802.15	1559.73	2390.24	2202.09	1995.41	2072.59
MFHAS1	ENSG00000147324	9258	malignant fibrous histiocytoma amplified sequence 1 [Source:HGNC Symbol;Acc:HGNC:16982]	protein_coding	353.921	-0.854422	0.226004	-0.718958	0.248301	-3.78056	0.000156476	0.0103341	512.353	541.096	299.391	471.613	257.718	236.466	254.468	258.259
TGIF1	ENSG00000177426	7050	TGFB induced factor homeobox 1 [Source:HGNC Symbol;Acc:HGNC:11776]	protein_coding	48.3108	5.04218	1.33466	4.15924	1.56933	3.77786	0.00015818	0.0103971	9.4443	1.21051	1.16043	0	1.33533	159.615	79.7013	134.019
CBX3	ENSG00000122565	11335	chromobox 3 [Source:HGNC Symbol;Acc:HGNC:1553]	protein_coding	3220.04	0.512298	0.135776	0.438641	0.145629	3.7731	0.000161229	0.0105476	2950.16	2155.91	2818.69	2690.47	4406.59	3762.77	3207.26	3768.48
DYNC2LI1	ENSG00000138036	51626	dynein cytoplasmic 2 light intermediate chain 1 [Source:HGNC Symbol;Acc:HGNC:24595]	protein_coding	356.519	1.2672	0.336238	1.06445	0.3736	3.76875	0.00016407	0.0106331	120.415	151.313	351.611	213.078	415.287	570.475	521.42	508.549
FAU	ENSG00000149806	2197	FAU ubiquitin like and ribosomal protein S30 fusion [Source:HGNC Symbol;Acc:HGNC:3597]	protein_coding	7778.21	0.465292	0.123442	0.399472	0.131598	3.76931	0.000163702	0.0106331	5606.37	5703.91	7541.64	7279.97	9974.91	9068.49	8862.21	8188.22
HLCS	ENSG00000159267	3141	holocarboxylase synthetase [Source:HGNC Symbol;Acc:HGNC:4976]	protein_coding	376.834	-0.643213	0.170934	-0.543747	0.186074	-3.76294	0.000167928	0.0108326	489.923	406.73	475.777	461.466	316.473	325.141	235.263	303.898
SLC15A2	ENSG00000163406	6565	solute carrier family 15 member 2 [Source:HGNC Symbol;Acc:HGNC:10921]	protein_coding	28.726	-5.82062	1.54816	-0.0186085	0.114641	-3.75969	0.000170124	0.0109234	144.026	1.21051	4.64172	74.6788	1.33533	2.95583	0.960257	0
MAPK4	ENSG00000141639	5596	mitogen-activated protein kinase 4 [Source:HGNC Symbol;Acc:HGNC:6878]	protein_coding	28.5399	5.06988	1.34999	4.16516	1.57955	3.7555	0.000172997	0.0110567	1.18054	1.21051	4.64172	0	70.7724	53.205	0.960257	96.3491
DNAJB4	ENSG00000162616	11080	DnaJ heat shock protein family (Hsp40) member B4 [Source:HGNC Symbol;Acc:HGNC:14886]	protein_coding	224.264	-0.702651	0.187162	-0.59236	0.204065	-3.75424	0.000173871	0.0110615	305.759	294.153	235.568	279.64	180.269	147.792	173.807	177.123
CATSPERE	ENSG00000179397	257044	catsper channel auxiliary subunit epsilon [Source:HGNC Symbol;Acc:HGNC:28491]	protein_coding	11.3909	6.31094	1.68478	5.12577	2.14716	3.74585	0.000179784	0.011338	1.18054	0	0	0	1.33533	11.8233	41.291	35.497
NSUN3	ENSG00000178694	63899	NOP2/Sun RNA methyltransferase 3 [Source:HGNC Symbol;Acc:HGNC:26208]	protein_coding	274.33	-1.59506	0.425832	-1.32322	0.477221	-3.74576	0.000179851	0.011338	251.454	739.619	215.84	443.608	105.491	112.322	193.012	133.295
ZSCAN23	ENSG00000187987	222696	zinc finger and SCAN domain containing 23 [Source:HGNC Symbol;Acc:HGNC:21193]	protein_coding	51.0227	-5.87917	1.57202	-0.016744	0.114214	-3.73987	0.000184115	0.0115542	267.982	1.21051	1.16043	130.282	2.67066	2.95583	1.92051	0
VCPIP1	ENSG00000175073	80124	valosin containing protein interacting protein 1 [Source:HGNC Symbol;Acc:HGNC:30897]	protein_coding	373.619	-0.830066	0.223832	-0.691954	0.247641	-3.70843	0.000208552	0.0130289	512.353	533.833	372.498	489.877	301.784	313.318	191.091	274.196
FAM227B	ENSG00000166262	196951	family with sequence similarity 227 member B [Source:HGNC Symbol;Acc:HGNC:26543]	protein_coding	23.8734	-6.24395	1.68784	-0.0166636	0.114196	-3.69937	0.000216137	0.0134421	2.36107	122.261	1.16043	62.9088	1.33533	0	0.960257	0
USP12	ENSG00000152484	219333	ubiquitin specific peptidase 12 [Source:HGNC Symbol;Acc:HGNC:20485]	protein_coding	354.082	-0.585161	0.158262	-0.493239	0.171566	-3.69743	0.000217794	0.0134847	432.077	398.257	450.247	424.533	253.712	254.201	328.408	291.22
KCTD18	ENSG00000155729	130535	potassium channel tetramerization domain containing 18 [Source:HGNC Symbol;Acc:HGNC:26446]	protein_coding	75.9195	-2.46872	0.669157	-0.067378	0.144331	-3.6893	0.000224869	0.0136684	185.344	152.524	30.1712	145.299	38.7245	26.6025	7.68206	21.0084
PAX9	ENSG00000198807	5083	paired box 9 [Source:HGNC Symbol;Acc:HGNC:8623]	protein_coding	110.116	-1.9242	0.521686	-0.115145	0.230207	-3.68843	0.000225644	0.0136684	271.524	186.418	51.059	185.885	36.0539	67.9841	37.45	44.5524
RPS13	ENSG00000110700	6207	ribosomal protein S13 [Source:HGNC Symbol;Acc:HGNC:10386]	protein_coding	11455.3	0.482214	0.130718	0.410064	0.140218	3.68897	0.000225162	0.0136684	7782.1	8530.44	11668.1	10251.3	14612.5	12828.3	13435.9	12534.1
SEM1	ENSG00000127922	7979	SEM1 26S proteasome complex subunit [Source:HGNC Symbol;Acc:HGNC:10845]	protein_coding	1924.02	0.471092	0.127723	0.401111	0.136715	3.68838	0.000225687	0.0136684	1376.51	1643.87	1778.94	1655.92	2582.53	1915.38	2247.96	2191.04
TRIP4	ENSG00000103671	9325	thyroid hormone receptor interactor 4 [Source:HGNC Symbol;Acc:HGNC:12310]	protein_coding	247.114	1.44566	0.391794	1.19311	0.441534	3.68985	0.000224384	0.0136684	187.705	123.472	85.8719	132.311	409.946	508.403	162.283	366.923
ZNF681	ENSG00000196172	148213	zinc finger protein 681 [Source:HGNC Symbol;Acc:HGNC:26457]	protein_coding	7.32286	-6.18743	1.67923	-0.0188328	0.114684	-3.68469	0.000228986	0.0138078	11.8054	4.84203	22.0482	19.8873	0	0	0	0
PHPT1	ENSG00000054148	29085	phosphohistidine phosphatase 1 [Source:HGNC Symbol;Acc:HGNC:30033]	protein_coding	517.693	0.814785	0.221539	0.678138	0.245041	3.67784	0.00023522	0.0141224	251.454	382.52	488.541	379.076	599.563	635.504	763.404	641.482
DCDC2	ENSG00000146038	51473	doublecortin domain containing 2 [Source:HGNC Symbol;Acc:HGNC:18141]	protein_coding	8.69078	6.71305	1.82846	0.0155292	0.113952	3.67142	0.00024121	0.0143577	0	0	0	0	33.3832	8.86749	1.92051	25.355
TEX10	ENSG00000136891	54881	testis expressed 10 [Source:HGNC Symbol;Acc:HGNC:25988]	protein_coding	671.687	-0.715574	0.194892	-0.595871	0.21491	-3.67165	0.00024099	0.0143577	750.822	765.04	966.639	847.848	423.299	679.841	420.593	519.416
ZFPM2	ENSG00000169946	23414	zinc finger protein, FOG family member 2 [Source:HGNC Symbol;Acc:HGNC:16700]	protein_coding	28.9314	-5.81895	1.58624	-0.0174803	0.11437	-3.6684	0.000244072	0.014466	122.776	2.42101	1.16043	99.8423	1.33533	2.95583	0.960257	0
C6orf141	ENSG00000197261	135398	chromosome 6 open reading frame 141 [Source:HGNC Symbol;Acc:HGNC:21351]	protein_coding	20.6888	-6.04525	1.65291	-0.0174785	0.114375	-3.65733	0.000254854	0.0150407	86.1792	3.63152	1.16043	72.2436	1.33533	0	0.960257	0
RPL19	ENSG00000108298	6143	ribosomal protein L19 [Source:HGNC Symbol;Acc:HGNC:10312]	protein_coding	16348.9	0.255401	0.0699421	0.226321	0.0715161	3.65161	0.000260598	0.0153145	13935.1	16264.4	14001.8	15418.7	18493	17489.7	17778.2	17410.2
CLUH	ENSG00000132361	23277	clustered mitochondria homolog [Source:HGNC Symbol;Acc:HGNC:29094]	protein_coding	1022.06	-0.585205	0.160338	-0.490194	0.174434	-3.64982	0.00026242	0.0153566	1351.72	1126.98	1188.28	1250.06	934.73	594.122	900.721	829.833
NAA25	ENSG00000111300	80018	N-alpha-acetyltransferase 25, NatB auxiliary subunit [Source:HGNC Symbol;Acc:HGNC:25783]	protein_coding	1000.99	-0.6258	0.171799	-0.52033	0.188032	-3.64263	0.000269865	0.0157259	1280.88	1108.82	1234.7	1239.91	611.581	715.311	1016.91	799.77
CHRAC1	ENSG00000104472	54108	chromatin accessibility complex subunit 1 [Source:HGNC Symbol;Acc:HGNC:13544]	protein_coding	364.285	0.945587	0.260177	0.779909	0.290478	3.63439	0.000278634	0.0161548	329.37	167.05	247.172	254.07	409.946	404.949	617.445	484.281
SH3BGRL	ENSG00000131171	6451	SH3 domain binding glutamate rich protein like [Source:HGNC Symbol;Acc:HGNC:10823]	protein_coding	1000.34	0.38084	0.104817	0.326528	0.110733	3.63339	0.00027972	0.0161548	807.487	831.618	906.297	919.28	1147.05	1244.4	1069.73	1076.86
SLC22A15	ENSG00000163393	55356	solute carrier family 22 member 15 [Source:HGNC Symbol;Acc:HGNC:20301]	protein_coding	85.6891	-1.86703	0.513984	-1.51519	0.591218	-3.63247	0.000280721	0.0161548	192.428	142.84	55.7007	143.676	32.0479	62.0725	20.1654	36.5837
MTRNR2L10	ENSG00000256045	100463488	MT-RNR2 like 10 [Source:HGNC Symbol;Acc:HGNC:37167]	protein_coding	13.2308	5.06102	1.3937	4.08323	1.60876	3.63136	0.000281926	0.0161572	1.18054	1.21051	1.16043	0	10.6826	2.95583	55.6949	32.9615
SDHA	ENSG00000073578	6389	succinate dehydrogenase complex flavoprotein subunit A [Source:HGNC Symbol;Acc:HGNC:10680]	protein_coding	444.894	-0.716923	0.197613	-0.592971	0.217907	-3.62791	0.00028573	0.0163078	509.992	493.887	657.964	558.062	308.461	263.069	419.632	348.088
SNX27	ENSG00000143376	81609	sorting nexin 27 [Source:HGNC Symbol;Acc:HGNC:20073]	protein_coding	657.253	-0.812862	0.224149	-0.670073	0.249162	-3.62644	0.000287354	0.0163333	1058.94	834.039	579.055	879.505	375.227	475.889	576.154	479.21
MAML3	ENSG00000196782	55534	mastermind like transcriptional coactivator 3 [Source:HGNC Symbol;Acc:HGNC:16272]	protein_coding	58.2095	-5.73443	1.58516	-0.0158549	0.11402	-3.61756	0.000297388	0.0167662	1.18054	291.732	1.16043	162.345	5.34132	2.95583	0.960257	0
SMIM26	ENSG00000232388	388789	small integral membrane protein 26 [Source:HGNC Symbol;Acc:HGNC:43430]	protein_coding	299.777	1.51686	0.419236	1.24031	0.476107	3.61817	0.000296698	0.0167662	191.247	61.7358	217.001	151.387	685.024	348.788	285.196	457.839
HECTD1	ENSG00000092148	25831	HECT domain E3 ubiquitin protein ligase 1 [Source:HGNC Symbol;Acc:HGNC:20157]	protein_coding	1513.86	-0.389162	0.107913	-0.331705	0.114241	-3.60625	0.000310655	0.0174432	1921.91	1712.87	1485.35	1749.68	1394.08	1250.32	1282.9	1313.75
TPRKB	ENSG00000144034	51002	TP53RK binding protein [Source:HGNC Symbol;Acc:HGNC:24259]	protein_coding	612.665	0.678842	0.188436	0.56222	0.207842	3.6025	0.000315172	0.0176255	481.659	347.415	573.253	482.165	658.317	750.781	865.191	742.54
PDXP	ENSG00000241360	57026	pyridoxal phosphatase [Source:HGNC Symbol;Acc:HGNC:30259]	protein_coding	73.9852	1.49054	0.414263	1.21456	0.470505	3.59806	0.000320601	0.0177702	37.7772	18.1576	59.182	40.1804	124.186	97.5424	112.35	102.507
SERINC4	ENSG00000184716	619189	serine incorporator 4 [Source:HGNC Symbol;Acc:HGNC:32237]	protein_coding	9.42431	-5.72287	1.5909	-0.0203592	0.115072	-3.59725	0.000321604	0.0177702	8.26376	37.5257	3.48129	25.1635	0	0	0.960257	0
TEDC1	ENSG00000185347	283643	tubulin epsilon and delta complex 1 [Source:HGNC Symbol;Acc:HGNC:20127]	protein_coding	270.682	0.598363	0.166245	0.497901	0.181897	3.59928	0.000319094	0.0177702	191.247	199.734	242.53	226.472	321.814	325.141	346.653	311.867
MTRNR2L12	ENSG00000269028	100462981	MT-RNR2 like 12 [Source:HGNC Symbol;Acc:HGNC:37169]	protein_coding	408.407	1.33806	0.372171	1.09125	0.422178	3.59529	0.000324029	0.0178332	262.079	147.682	297.07	221.601	654.311	251.246	864.231	569.039
FAM171B	ENSG00000144369	165215	family with sequence similarity 171 member B [Source:HGNC Symbol;Acc:HGNC:29412]	protein_coding	217.898	-1.16935	0.325467	-0.953539	0.366566	-3.59284	0.000327094	0.0178601	262.079	374.046	258.776	317.791	140.21	65.0283	187.25	138.004
IFITM1	ENSG00000185885	8519	interferon induced transmembrane protein 1 [Source:HGNC Symbol;Acc:HGNC:5412]	protein_coding	346.161	1.00249	0.278973	0.818323	0.314276	3.5935	0.000326269	0.0178601	169.997	162.208	352.771	235.806	429.976	514.315	450.36	453.855
ALDH1L1	ENSG00000144908	10840	aldehyde dehydrogenase 1 family member L1 [Source:HGNC Symbol;Acc:HGNC:3978]	protein_coding	9.41106	-5.92219	1.65032	-0.0188973	0.114705	-3.58851	0.000332573	0.0180881	33.055	1.21051	23.2086	17.4521	0	0	0	0.362214
NELL2	ENSG00000184613	4753	neural EGFL like 2 [Source:HGNC Symbol;Acc:HGNC:7751]	protein_coding	70.4784	-2.1375	0.596085	-0.0807368	0.160013	-3.58589	0.000335928	0.0181992	42.4993	198.523	93.9949	121.353	21.3653	47.2933	13.4436	25.355
ERICH2	ENSG00000204334	285141	glutamate rich 2 [Source:HGNC Symbol;Acc:HGNC:44395]	protein_coding	11.9391	4.89662	1.36866	3.90926	1.59175	3.57768	0.000346652	0.0184893	1.18054	1.21051	1.16043	0	42.7305	17.735	2.88077	28.6149
KLHL2	ENSG00000109466	11275	kelch like family member 2 [Source:HGNC Symbol;Acc:HGNC:6353]	protein_coding	192.931	1.49206	0.41708	1.21119	0.475324	3.5774	0.00034703	0.0184893	110.97	118.63	76.5885	100.654	256.383	112.322	470.526	297.378
LCAT	ENSG00000213398	3931	lecithin-cholesterol acyltransferase [Source:HGNC Symbol;Acc:HGNC:6522]	protein_coding	23.135	-5.12067	1.4303	-0.0210592	0.115266	-3.58014	0.000343406	0.0184893	1.18054	15.7366	98.6366	63.3146	1.33533	2.95583	1.92051	0
NDUFS5	ENSG00000168653	4725	NADH:ubiquinone oxidoreductase subunit S5 [Source:HGNC Symbol;Acc:HGNC:7712]	protein_coding	2304.08	0.532289	0.148821	0.443923	0.161874	3.57671	0.00034795	0.0184893	1506.37	1704.39	2403.25	1919.73	2909.68	2725.28	2593.65	2670.25
SLC10A4	ENSG00000145248	201780	solute carrier family 10 member 4 [Source:HGNC Symbol;Acc:HGNC:22980]	protein_coding	26.3305	-5.68043	1.58685	-0.0173472	0.114334	-3.57969	0.000343997	0.0184893	100.346	2.42101	1.16043	101.466	1.33533	2.95583	0.960257	0
RPS3A	ENSG00000145425	6189	ribosomal protein S3A [Source:HGNC Symbol;Acc:HGNC:10421]	protein_coding	27784.6	0.397377	0.111217	0.333859	0.118136	3.57298	0.000352936	0.0186827	20836.5	21773.4	28980.6	24333.5	33268.4	32774.3	29091.9	31218.5
GBX1	ENSG00000164900	2636	gastrulation brain homeobox 1 [Source:HGNC Symbol;Acc:HGNC:4185]	protein_coding	18.1928	-5.73359	1.60701	-0.0179804	0.11447	-3.56787	0.000359894	0.0187645	15.347	44.7887	1.16043	79.955	1.33533	2.95583	0	0
MROH8	ENSG00000101353	140699	maestro heat like repeat family member 8 [Source:HGNC Symbol;Acc:HGNC:16125]	protein_coding	484.549	0.926586	0.259628	0.756285	0.291764	3.5689	0.000358479	0.0187645	289.232	238.47	471.135	339.301	598.227	505.447	826.781	607.796
NTN1	ENSG00000065320	9423	netrin 1 [Source:HGNC Symbol;Acc:HGNC:8029]	protein_coding	191.727	-1.78093	0.499081	-1.43571	0.573398	-3.56841	0.000359152	0.0187645	122.776	566.517	177.546	322.661	65.4311	67.9841	128.674	82.2227
SEMA4F	ENSG00000135622	10505	ssemaphorin 4F [Source:HGNC Symbol;Acc:HGNC:10734]	protein_coding	296.058	-1.25481	0.351626	-1.01444	0.401345	-3.56859	0.000358913	0.0187645	571.38	440.624	199.594	453.349	153.563	242.378	134.436	173.139
ZNF524	ENSG00000171443	147807	zinc finger protein 524 [Source:HGNC Symbol;Acc:HGNC:28322]	protein_coding	35.6901	-5.71217	1.60233	-0.0164166	0.114134	-3.56492	0.000363963	0.0189056	1.18054	179.155	1.16043	97.813	1.33533	2.95583	1.92051	0
F8	ENSG00000185010	2157	coagulation factor VIII [Source:HGNC Symbol;Acc:HGNC:3546]	protein_coding	18.004	-3.26753	0.918471	-0.0438417	0.125153	-3.55758	0.000374294	0.0193697	56.6658	26.6311	12.7647	34.9042	8.01197	0	2.88077	2.17329
DYNLT1	ENSG00000146425	6993	dynein light chain Tctex-type 1 [Source:HGNC Symbol;Acc:HGNC:11697]	protein_coding	1477.44	0.370501	0.104188	0.316047	0.110003	3.55608	0.000376432	0.0193721	1238.38	1169.35	1419.21	1329.61	1832.07	1551.81	1651.64	1627.43
RIC8A	ENSG00000177963	60626	RIC8 guanine nucleotide exchange factor A [Source:HGNC Symbol;Acc:HGNC:29550]	protein_coding	1001.75	-0.901281	0.253483	-0.732883	0.285449	-3.55559	0.000377134	0.0193721	1818.03	827.986	1194.08	1376.69	507.425	815.809	780.689	693.279
PRUNE2	ENSG00000106772	158471	prune homolog 2 with BCH domain [Source:HGNC Symbol;Acc:HGNC:25209]	protein_coding	38.0225	-4.78434	1.34812	-0.0214241	0.115375	-3.5489	0.000386843	0.0197975	72.0128	66.5778	1.16043	153.416	1.33533	2.95583	6.7218	0
RUNX1	ENSG00000159216	861	RUNX family transcription factor 1 [Source:HGNC Symbol;Acc:HGNC:10471]	protein_coding	37.6987	-5.69949	1.61015	-0.0161255	0.114071	-3.53972	0.00040055	0.0204236	1.18054	202.155	1.16043	90.5075	2.67066	2.95583	0.960257	0
MDGA2	ENSG00000139915	161357	MAM domain containing glycosylphosphatidylinositol anchor 2 [Source:HGNC Symbol;Acc:HGNC:19835]	protein_coding	17.3339	-5.11051	1.4493	-0.0211718	0.115282	-3.52618	0.000421596	0.021418	1.18054	64.1568	18.5669	49.5153	1.33533	2.95583	0.960257	0
DNAJC22	ENSG00000178401	79962	DnaJ heat shock protein family (Hsp40) member C22 [Source:HGNC Symbol;Acc:HGNC:25802]	protein_coding	79.5464	-2.16419	0.61472	-0.0742989	0.151707	-3.52061	0.000430563	0.0217937	178.261	125.893	67.305	146.517	5.34132	50.2491	37.45	25.355
FNTB	ENSG00000257365	2342	farnesyltransferase, CAAX box, beta [Source:HGNC Symbol;Acc:HGNC:3785]	protein_coding	136.242	-1.63491	0.464994	-1.30532	0.538136	-3.51598	0.000438131	0.0219437	270.343	127.103	199.594	226.877	22.7006	79.8074	97.9462	65.5608
NDUFB8	ENSG00000166136	4714	NADH:ubiquinone oxidoreductase subunit B8 [Source:HGNC Symbol;Acc:HGNC:7703]	protein_coding	465.045	-1.20913	0.343904	-0.971241	0.393316	-3.5159	0.000438272	0.0219437	505.27	997.457	403.83	693.62	206.976	215.776	422.513	274.921
RPS14	ENSG00000164587	6208	ribosomal protein S14 [Source:HGNC Symbol;Acc:HGNC:10387]	protein_coding	20589.8	0.450817	0.128161	0.379162	0.137939	3.5176	0.000435474	0.0219437	14611.5	15314.1	20508.3	19157.5	27227.4	22762.9	23347.7	21789.4
AHDC1	ENSG00000126705	27245	AT-hook DNA binding motif containing 1 [Source:HGNC Symbol;Acc:HGNC:25230]	protein_coding	123.78	-1.66567	0.474714	-1.33161	0.547065	-3.50879	0.000450149	0.0220345	236.107	231.207	83.551	204.961	45.4012	32.5141	98.9065	57.5921
CCDC157	ENSG00000187860	550631	coiled-coil domain containing 157 [Source:HGNC Symbol;Acc:HGNC:33854]	protein_coding	98.0616	0.97642	0.277969	0.788882	0.31479	3.51269	0.000443594	0.0220345	60.2074	78.6829	51.059	73.4612	134.868	127.101	142.118	116.995
COLEC11	ENSG00000118004	78989	collectin subfamily member 11 [Source:HGNC Symbol;Acc:HGNC:17213]	protein_coding	12.5793	-5.35436	1.52605	-0.0210142	0.115249	-3.50864	0.000450406	0.0220345	41.3188	6.05253	3.48129	47.486	1.33533	0	0.960257	0
OSBP	ENSG00000110048	5007	oxysterol binding protein [Source:HGNC Symbol;Acc:HGNC:8503]	protein_coding	783.773	-0.761406	0.217038	-0.617318	0.243721	-3.50817	0.000451208	0.0220345	1302.13	854.617	751.959	1028.46	492.736	738.958	521.42	579.905
PHACTR4	ENSG00000204138	65979	phosphatase and actin regulator 4 [Source:HGNC Symbol;Acc:HGNC:25793]	protein_coding	1030.33	-0.463907	0.132184	-0.384997	0.142782	-3.50955	0.000448858	0.0220345	1173.45	1020.46	1387.88	1198.92	785.173	851.279	942.012	883.441
RPSA	ENSG00000168028	3921	ribosomal protein SA [Source:HGNC Symbol;Acc:HGNC:6502]	protein_coding	29590.5	0.335454	0.0956136	0.290193	0.100168	3.50843	0.000450763	0.0220345	23367.6	24136.3	29389.1	27764.7	36478.5	32549.6	31616.5	31421.7
UNC119	ENSG00000109103	9094	unc-119 lipid binding chaperone [Source:HGNC Symbol;Acc:HGNC:12565]	protein_coding	299.536	-1.06015	0.30177	-0.855736	0.343632	-3.51311	0.000442898	0.0220345	291.593	612.516	295.91	419.257	150.892	206.908	224.7	194.509
ACOT8	ENSG00000101473	10005	acyl-CoA thioesterase 8 [Source:HGNC Symbol;Acc:HGNC:15919]	protein_coding	325.967	0.710988	0.20315	0.578955	0.226662	3.49981	0.000465585	0.0225776	247.913	182.786	301.712	257.317	399.263	369.479	452.281	396.987
BRK1	ENSG00000254999	55845	BRICK1 subunit of SCAR/WAVE actin nucleating complex [Source:HGNC Symbol;Acc:HGNC:23057]	protein_coding	1554.52	0.5685	0.162424	0.467317	0.178557	3.5001	0.000465083	0.0225776	1028.25	1348.5	1361.19	1270.76	2326.14	1738.03	1518.17	1845.12
GRIPAP1	ENSG00000068400	56850	GRIP1 associated protein 1 [Source:HGNC Symbol;Acc:HGNC:18706]	protein_coding	725.576	-0.805556	0.230675	-0.650171	0.260272	-3.49217	0.000479114	0.0231527	997.554	1140.3	583.697	966.36	554.161	614.813	422.513	525.211
CACNB2	ENSG00000165995	783	calcium voltage-gated channel auxiliary subunit beta 2 [Source:HGNC Symbol;Acc:HGNC:1402]	protein_coding	40.7656	5.3034	1.5199	4.12873	1.93409	3.48931	0.000484274	0.0233208	1.18054	6.05253	1.16043	0	1.33533	212.82	2.88077	100.696
BRD3	ENSG00000169925	8019	bromodomain containing 3 [Source:HGNC Symbol;Acc:HGNC:1104]	protein_coding	693.335	-0.394036	0.113088	-0.331244	0.120447	-3.48433	0.000493368	0.0236766	838.181	703.304	815.783	793.056	624.934	591.166	568.472	611.78
STAMBPL1	ENSG00000138134	57559	STAM binding protein like 1 [Source:HGNC Symbol;Acc:HGNC:24105]	protein_coding	56.5436	1.31026	0.376363	1.04628	0.433682	3.48136	0.000498871	0.0238581	23.6107	41.1572	29.0108	34.9042	62.7605	103.454	80.6616	76.7895
TUBGCP6	ENSG00000128159	85378	tubulin gamma complex associated protein 6 [Source:HGNC Symbol;Acc:HGNC:18127]	protein_coding	460.98	-0.748272	0.215185	-0.60455	0.241749	-3.47734	0.000506411	0.0241355	622.143	654.884	437.483	597.836	257.718	351.744	418.672	347.364
DDX60	ENSG00000137628	55601	DExD/H-box helicase 60 [Source:HGNC Symbol;Acc:HGNC:25942]	protein_coding	14.8243	-5.44689	1.56684	-0.0188859	0.114675	-3.47636	0.000508272	0.0241412	29.5134	1.21051	41.7755	41.8039	1.33533	2.95583	0	0
BRI3BP	ENSG00000184992	140707	BRI3 binding protein [Source:HGNC Symbol;Acc:HGNC:14251]	protein_coding	748.051	-0.482856	0.139189	-0.399068	0.151273	-3.46908	0.000522248	0.0247204	966.86	910.301	720.628	888.84	671.67	632.548	563.671	629.891
HPS6	ENSG00000166189	79803	HPS6 biogenesis of lysosomal organelles complex 2 subunit 3 [Source:HGNC Symbol;Acc:HGNC:18817]	protein_coding	196.851	0.645527	0.186218	0.524398	0.207529	3.46652	0.000527244	0.0248719	147.567	147.682	153.177	161.533	252.377	271.936	211.257	229.282
PHLDA1	ENSG00000139289	22822	pleckstrin homology like domain family A member 1 [Source:HGNC Symbol;Acc:HGNC:8933]	protein_coding	16.6624	-5.04791	1.4601	-0.020651	0.115134	-3.45723	0.000545762	0.0256582	60.2074	1.21051	15.0856	51.5446	1.33533	2.95583	0.960257	0
HLX	ENSG00000136630	3142	H2.0 like homeobox [Source:HGNC Symbol;Acc:HGNC:4978]	protein_coding	16.5382	-5.03651	1.45823	-0.0206617	0.115136	-3.45386	0.000552627	0.0258932	1.18054	61.7358	16.246	47.8918	1.33533	2.95583	0.960257	0
CLDN23	ENSG00000253958	137075	claudin 23 [Source:HGNC Symbol;Acc:HGNC:17591]	protein_coding	14.5536	-5.52322	1.59998	-0.018113	0.114489	-3.45206	0.000556332	0.025979	12.9859	1.21051	55.7007	42.6156	0	2.95583	0.960257	0
NBPF1	ENSG00000219481	55672	NBPF member 1 [Source:HGNC Symbol;Acc:HGNC:26088]	protein_coding	1139.75	-0.379008	0.109991	-0.318927	0.116826	-3.44579	0.000569387	0.0264994	1406.02	1306.14	1138.38	1310.94	989.479	904.484	1069.73	992.83
KCNQ1	ENSG00000053918	3784	potassium voltage-gated channel subfamily Q member 1 [Source:HGNC Symbol;Acc:HGNC:6294]	protein_coding	15.2073	-4.9216	1.43041	-0.0215685	0.115381	-3.44068	0.00058025	0.0267574	1.18054	49.6308	27.8503	37.7453	1.33533	2.95583	0.960257	0
MT1F	ENSG00000198417	4494	metallothionein 1F [Source:HGNC Symbol;Acc:HGNC:7398]	protein_coding	98.0735	1.16339	0.33804	0.924777	0.38933	3.44159	0.000578312	0.0267574	63.749	36.3152	80.0697	62.5029	157.569	109.366	147.88	127.137
VSTM2L	ENSG00000132821	128434	V-set and transmembrane domain containing 2 like [Source:HGNC Symbol;Acc:HGNC:16096]	protein_coding	19.3029	-5.24049	1.52319	-0.0187636	0.114654	-3.44046	0.000580719	0.0267574	93.2624	7.26304	1.16043	47.486	1.33533	2.95583	0.960257	0
ATP6V1G1	ENSG00000136888	9550	ATPase H+ transporting V1 subunit G1 [Source:HGNC Symbol;Acc:HGNC:864]	protein_coding	1335.15	0.548375	0.159454	0.449104	0.175811	3.43908	0.000583694	0.0268055	845.265	1126.98	1262.55	1096.64	1491.56	1891.73	1393.33	1573.1
CERS2	ENSG00000143418	29956	ceramide synthase 2 [Source:HGNC Symbol;Acc:HGNC:14076]	protein_coding	2568.89	-0.312573	0.0910565	-0.266191	0.0950512	-3.43274	0.000597525	0.0273234	3111.9	2859.22	2497.25	2911.66	2183.26	2373.53	2330.54	2283.76
RPL21	ENSG00000122026	6144	ribosomal protein L21 [Source:HGNC Symbol;Acc:HGNC:10313]	protein_coding	11146.1	0.481188	0.140238	0.394364	0.152837	3.43123	0.000600849	0.0273234	7524.74	8330.7	11954.8	9403.85	13664.4	13632.3	11793.9	12864
RPL32	ENSG00000144713	6161	ribosomal protein L32 [Source:HGNC Symbol;Acc:HGNC:10336]	protein_coding	20248.4	0.440773	0.12846	0.375961	0.1384	3.43122	0.000600883	0.0273234	14408.5	14932.8	20820.5	18552	25989.5	22408.2	23126.8	21749.2
AFF4	ENSG00000072364	27125	AF4/FMR2 family member 4 [Source:HGNC Symbol;Acc:HGNC:17869]	protein_coding	1541.7	-0.392974	0.114668	-0.331365	0.122387	-3.42704	0.000610193	0.0275293	1899.48	1643.87	1680.3	1777.27	1528.95	1297.61	1164.79	1341.28
LIMS2	ENSG00000072163	55679	LIM zinc finger domain containing 2 [Source:HGNC Symbol;Acc:HGNC:16084]	protein_coding	77.8286	-1.16868	0.341158	-0.926052	0.391927	-3.42564	0.000613353	0.0275293	116.873	102.893	107.92	107.148	41.3952	29.5583	67.218	49.6234
PTCH2	ENSG00000117425	8643	patched 2 [Source:HGNC Symbol;Acc:HGNC:9586]	protein_coding	13.1687	-4.72977	1.38084	-0.0233081	0.11588	-3.42528	0.000614166	0.0275293	35.4161	24.2101	2.32086	38.1511	1.33533	2.95583	0.960257	0
PYROXD2	ENSG00000119943	84795	pyridine nucleotide-disulphide oxidoreductase domain 2 [Source:HGNC Symbol;Acc:HGNC:23517]	protein_coding	14.926	-4.89832	1.42925	-0.0215815	0.115383	-3.4272	0.000609838	0.0275293	49.5826	3.63152	6.96259	53.9798	1.33533	2.95583	0.960257	0
ZDHHC7	ENSG00000153786	55625	zinc finger DHHC-type palmitoyltransferase 7 [Source:HGNC Symbol;Acc:HGNC:18459]	protein_coding	628.451	-0.816867	0.238518	-0.651072	0.271529	-3.42476	0.000615335	0.0275293	651.657	861.881	866.842	824.308	604.904	472.933	286.157	458.926
CENPL	ENSG00000120334	91687	centromere protein L [Source:HGNC Symbol;Acc:HGNC:17879]	protein_coding	246.265	-0.774706	0.226385	-0.619429	0.255974	-3.42207	0.000621465	0.0277141	276.246	395.836	259.937	315.761	184.275	144.836	207.415	185.816
ASAP1	ENSG00000153317	50807	ArfGAP with SH3 domain, ankyrin repeat and PH domain 1 [Source:HGNC Symbol;Acc:HGNC:2720]	protein_coding	447.887	-0.541522	0.158646	-0.440145	0.174953	-3.41341	0.000641551	0.0285152	579.644	446.677	563.97	532.898	312.467	384.258	390.825	372.356
MRPS14	ENSG00000120333	63931	mitochondrial ribosomal protein S14 [Source:HGNC Symbol;Acc:HGNC:14049]	protein_coding	597.902	0.524578	0.153719	0.427301	0.169269	3.41257	0.00064354	0.0285152	449.785	514.465	489.702	500.023	705.054	851.279	579.995	692.916
RAB8A	ENSG00000167461	4218	RAB8A, member RAS oncogene family [Source:HGNC Symbol;Acc:HGNC:7007]	protein_coding	656.054	-0.798988	0.234764	-0.635818	0.267063	-3.40336	0.000665625	0.0293998	762.627	1019.25	691.617	865.706	403.269	354.7	673.14	478.123
AK8	ENSG00000165695	158067	adenylate kinase 8 [Source:HGNC Symbol;Acc:HGNC:26526]	protein_coding	16.9508	4.9326	1.45225	3.77209	1.81769	3.39652	0.000682484	0.0299537	2.36107	1.21051	1.16043	0	45.4012	0	22.0859	63.3875
ITIH4	ENSG00000055955	3700	inter-alpha-trypsin inhibitor heavy chain 4 [Source:HGNC Symbol;Acc:HGNC:6169]	protein_coding	16.8661	-5.59952	1.6486	-0.0166257	0.114155	-3.39653	0.000682454	0.0299537	1.18054	72.6304	8.12302	48.7036	1.33533	2.95583	0	0
ASB13	ENSG00000196372	79754	ankyrin repeat and SOCS box containing 13 [Source:HGNC Symbol;Acc:HGNC:19765]	protein_coding	369.614	-1.05361	0.310469	-0.831174	0.359209	-3.39359	0.000689823	0.0300686	382.494	757.777	330.723	527.216	308.461	177.35	232.382	240.51
C1GALT1C1L	ENSG00000223658	728819	C1GALT1 specific chaperone 1 like [Source:HGNC Symbol;Acc:HGNC:51617]	protein_coding	18.4572	-5.27642	1.55588	-0.0180332	0.114477	-3.39128	0.000695673	0.0300686	12.9859	1.21051	59.182	69.4026	0	2.95583	1.92051	0
LINC00634	ENSG00000205704		long intergenic non-protein coding RNA 634 [Source:HGNC Symbol;Acc:HGNC:27930]	protein_coding	17.1651	-3.42826	1.01094	-0.035279	0.120466	-3.39117	0.000695941	0.0300686	11.8054	49.6308	27.8503	34.4984	5.34132	5.91166	1.92051	0.362214
SFR1	ENSG00000156384	119392	SWI5 dependent homologous recombination repair protein 1 [Source:HGNC Symbol;Acc:HGNC:29574]	protein_coding	153.568	1.48723	0.438356	1.16452	0.515039	3.39275	0.000691942	0.0300686	76.7349	37.5257	129.968	79.955	276.413	118.233	274.633	235.077
WDR5	ENSG00000196363	11091	WD repeat domain 5 [Source:HGNC Symbol;Acc:HGNC:12757]	protein_coding	830.52	-0.664905	0.195946	-0.531802	0.220724	-3.3933	0.000690563	0.0300686	1160.47	974.458	879.607	1053.21	450.006	812.854	670.259	643.293
MYBL1	ENSG00000185697	4603	MYB proto-oncogene like 1 [Source:HGNC Symbol;Acc:HGNC:7547]	protein_coding	253.973	-0.588904	0.173742	-0.474663	0.192989	-3.38954	0.000700099	0.0301543	327.009	300.206	314.477	285.322	185.611	177.35	220.859	220.951
ATRIP	ENSG00000164053	84126	ATR interacting protein [Source:HGNC Symbol;Acc:HGNC:33499]	protein_coding	319.551	-0.678921	0.200536	-0.541161	0.226732	-3.38554	0.000710395	0.0304089	386.036	409.151	377.14	395.716	268.401	292.627	176.687	250.652
MTRNR2L8	ENSG00000255823	100463486	MT-RNR2 like 8 [Source:HGNC Symbol;Acc:HGNC:37165]	protein_coding	165.018	1.51819	0.44835	1.18656	0.527942	3.38617	0.000708743	0.0304089	92.0819	49.6308	119.524	81.9843	244.365	100.498	390.825	241.235
SYTL5	ENSG00000147041	94122	synaptotagmin like 5 [Source:HGNC Symbol;Acc:HGNC:15589]	protein_coding	51.4601	-4.49981	1.32962	-0.0207344	0.115172	-3.38428	0.000713645	0.030454	1.18054	37.5257	136.931	218.354	8.01197	2.95583	6.7218	0
AP2A2	ENSG00000183020	161	adaptor related protein complex 2 subunit alpha 2 [Source:HGNC Symbol;Acc:HGNC:562]	protein_coding	1009.26	-0.537047	0.158965	-0.434071	0.175741	-3.37839	0.000729127	0.0309243	959.777	1438.08	1167.39	1213.53	699.712	869.014	897.84	828.747
RBM11	ENSG00000185272	54033	RNA binding motif protein 11 [Source:HGNC Symbol;Acc:HGNC:9897]	protein_coding	86.9858	1.5749	0.466144	1.22645	0.551786	3.37856	0.000728652	0.0309243	21.2497	30.2627	78.9093	43.8332	100.15	165.527	124.833	131.122
KIF13A	ENSG00000137177	63971	kinesin family member 13A [Source:HGNC Symbol;Acc:HGNC:14566]	protein_coding	313.814	-0.854705	0.253462	-0.673483	0.291036	-3.37212	0.000745923	0.0314444	543.047	267.522	395.707	411.951	202.97	206.908	256.389	226.022
PPIL3	ENSG00000240344	53938	peptidylprolyl isomerase like 3 [Source:HGNC Symbol;Acc:HGNC:9262]	protein_coding	458.253	1.0395	0.308253	0.816296	0.358004	3.37224	0.000745581	0.0314444	257.357	311.1	335.365	297.903	1005.5	378.346	457.082	623.371
MAP3K15	ENSG00000180815	389840	mitogen-activated protein kinase kinase kinase 15 [Source:HGNC Symbol;Acc:HGNC:31689]	protein_coding	89.219	1.9296	0.572597	1.49583	0.684641	3.36991	0.000751939	0.0316019	56.6658	49.6308	8.12302	34.4984	210.982	97.5424	105.628	150.681
MSRB1	ENSG00000198736	51734	methionine sulfoxide reductase B1 [Source:HGNC Symbol;Acc:HGNC:14133]	protein_coding	412.356	0.623621	0.185226	0.498898	0.207913	3.36682	0.000760413	0.0318615	318.745	294.153	351.611	331.184	377.898	573.431	561.75	490.076
CLDN12	ENSG00000157224	9069	claudin 12 [Source:HGNC Symbol;Acc:HGNC:2034]	protein_coding	535.662	-0.694075	0.206328	-0.550618	0.23411	-3.36394	0.000768388	0.0320987	782.696	470.887	713.665	675.762	379.233	493.624	354.335	415.098
NLRP14	ENSG00000158077	338323	NLR family pyrin domain containing 14 [Source:HGNC Symbol;Acc:HGNC:22939]	protein_coding	9.85147	4.6305	1.37883	3.52741	1.67004	3.35829	0.000784256	0.0326632	1.18054	1.21051	1.16043	0	12.018	2.95583	34.5692	25.7172
CNKSR1	ENSG00000142675	10256	connector enhancer of kinase suppressor of Ras 1 [Source:HGNC Symbol;Acc:HGNC:19700]	protein_coding	14.2762	-4.82701	1.43869	-0.0210588	0.11523	-3.35514	0.000793242	0.0329385	9.4443	2.42101	47.5777	49.5153	1.33533	2.95583	0.960257	0
TRPV1	ENSG00000196689	7442	transient receptor potential cation channel subfamily V member 1 [Source:HGNC Symbol;Acc:HGNC:12716]	protein_coding	49.4428	-1.51136	0.451154	-1.16516	0.537182	-3.34999	0.000808154	0.0334576	63.749	107.735	45.2568	75.0847	20.0299	32.5141	24.0064	27.1661
ERBB3	ENSG00000065361	2065	erb-b2 receptor tyrosine kinase 3 [Source:HGNC Symbol;Acc:HGNC:3431]	protein_coding	152.95	-0.756067	0.225801	-0.594745	0.258961	-3.34838	0.00081286	0.0335523	179.442	199.734	193.792	191.161	101.485	144.836	95.0654	118.082
RPL7	ENSG00000147604	6129	ribosomal protein L7 [Source:HGNC Symbol;Acc:HGNC:10363]	protein_coding	26326.2	0.472874	0.141307	0.382231	0.154726	3.34643	0.000818584	0.0336883	18338.5	19294.3	28330.8	22236.8	34944.2	28857.8	28271.9	30335.1
NOVA2	ENSG00000104967	4858	NOVA alternative splicing regulator 2 [Source:HGNC Symbol;Acc:HGNC:7887]	protein_coding	98.981	-1.48817	0.445674	-1.1493	0.527469	-3.33916	0.000840332	0.034481	188.886	159.787	83.551	154.634	74.7784	20.6908	59.5359	49.9856
RPN2	ENSG00000118705	6185	ribophorin II [Source:HGNC Symbol;Acc:HGNC:10382]	protein_coding	3139.94	-0.251111	0.0752469	-0.216984	0.0770844	-3.33717	0.000846374	0.0345344	3562.86	3111	3534.67	3443.34	2726.74	2861.24	2990.24	2889.39
RPS20	ENSG00000008988	6224	ribosomal protein S20 [Source:HGNC Symbol;Acc:HGNC:10405]	protein_coding	11088.3	0.466395	0.139761	0.380156	0.152691	3.33709	0.000846614	0.0345344	7457.45	8244.76	11757.5	9784.55	14186.5	12455.9	12541.9	12278
KANK1	ENSG00000107104	23189	KN motif and ankyrin repeat domains 1 [Source:HGNC Symbol;Acc:HGNC:19309]	protein_coding	218.381	-1.55517	0.466293	-1.19826	0.555303	-3.33518	0.000852442	0.0346083	492.284	291.732	162.46	360.812	116.174	41.3816	178.608	103.593
PSD	ENSG00000059915	5662	pleckstrin and Sec7 domain containing [Source:HGNC Symbol;Acc:HGNC:9507]	protein_coding	31.3975	-4.75277	1.42518	-0.01894	0.114691	-3.33486	0.000853416	0.0346083	1.18054	30.2627	107.92	100.654	1.33533	8.86749	0.960257	0
ZNF462	ENSG00000148143	58499	zinc finger protein 462 [Source:HGNC Symbol;Acc:HGNC:21684]	protein_coding	76.1653	-1.30053	0.390567	-1.00148	0.463395	-3.32986	0.000868894	0.0351332	60.2074	141.629	121.845	109.177	34.7185	50.2491	45.1321	46.3635
COL5A2	ENSG00000204262	1290	collagen type V alpha 2 chain [Source:HGNC Symbol;Acc:HGNC:2210]	protein_coding	181.677	-1.82258	0.547606	-1.39015	0.664455	-3.32826	0.000873904	0.0352331	522.978	122.261	168.263	317.385	30.7126	121.189	98.9065	71.7185
RPL38	ENSG00000172809	6169	ribosomal protein L38 [Source:HGNC Symbol;Acc:HGNC:10349]	protein_coding	14044.4	0.428343	0.128778	0.350771	0.139546	3.32622	0.00088032	0.0352866	10543.4	9853.52	14723.5	12776.2	17229.7	15606.8	16424.2	15198.2
RPS19BP1	ENSG00000187051	91582	ribosomal protein S19 binding protein 1 [Source:HGNC Symbol;Acc:HGNC:28749]	protein_coding	1409.16	0.53425	0.160584	0.428517	0.17825	3.32692	0.000878126	0.0352866	907.833	1004.72	1425.01	1262.64	1663.82	1755.76	1724.62	1528.91
LANCL2	ENSG00000132434	55915	LanC like 2 [Source:HGNC Symbol;Acc:HGNC:6509]	protein_coding	140.389	-1.94651	0.585572	-0.0744936	0.15147	-3.32411	0.000887004	0.0353502	258.538	188.839	181.027	259.752	78.7844	97.5424	8.64231	49.9856
SSR2	ENSG00000163479	6746	signal sequence receptor subunit 2 [Source:HGNC Symbol;Acc:HGNC:11324]	protein_coding	2183.39	0.305179	0.0917961	0.257976	0.0958569	3.32454	0.000885659	0.0353502	1984.48	1968.28	1734.84	2115.36	2511.75	2479.94	2414.09	2258.41
GNB4	ENSG00000114450	59345	G protein subunit beta 4 [Source:HGNC Symbol;Acc:HGNC:20731]	protein_coding	660.176	0.489449	0.147327	0.395715	0.161985	3.32219	0.000893129	0.0354923	668.184	516.886	461.852	550.756	797.191	753.737	754.762	778.037
RPL9	ENSG00000163682	6133	ribosomal protein L9 [Source:HGNC Symbol;Acc:HGNC:10369]	protein_coding	15639.3	0.316741	0.0954519	0.266207	0.100063	3.31834	0.000905556	0.0358833	13186.6	12298.7	16039.5	14190.2	18749.4	17182.2	16339.7	17127.7
SNRPE	ENSG00000182004	6635	small nuclear ribonucleoprotein polypeptide E [Source:HGNC Symbol;Acc:HGNC:11161]	protein_coding	3443.38	0.500415	0.151033	0.398447	0.16693	3.31328	0.000922077	0.0364339	2417.74	2408.91	3697.13	2885.28	4502.73	3804.15	3852.55	3978.56
ATP6V1E1	ENSG00000131100	529	ATPase H+ transporting V1 subunit E1 [Source:HGNC Symbol;Acc:HGNC:857]	protein_coding	1362.88	0.562161	0.169869	0.448051	0.189889	3.30938	0.000935026	0.0365105	992.832	951.458	1342.62	1114.09	1969.61	1625.71	1296.35	1610.41
COX7C	ENSG00000127184	1350	cytochrome c oxidase subunit 7C [Source:HGNC Symbol;Acc:HGNC:2292]	protein_coding	6290	0.425595	0.128587	0.347352	0.139371	3.30977	0.000933722	0.0365105	4748.12	4635.03	6642.31	5450.74	8049.36	6839.79	6836.07	7118.6
HNRNPC	ENSG00000092199	3183	heterogeneous nuclear ribonucleoprotein C [Source:HGNC Symbol;Acc:HGNC:5035]	protein_coding	13303.4	0.259847	0.0785335	0.223912	0.0807675	3.30874	0.000937178	0.0365105	11294.2	11796.4	13205.7	12150.7	15292.2	13085.5	15051.1	14551.2
ORC4	ENSG00000115947	5000	origin recognition complex subunit 4 [Source:HGNC Symbol;Acc:HGNC:8490]	protein_coding	928.291	0.536767	0.162138	0.429698	0.180279	3.31055	0.000931123	0.0365105	775.613	595.569	887.73	770.734	1281.92	1061.14	966.979	1086.64
PMEPA1	ENSG00000124225	56937	prostate transmembrane protein, androgen induced 1 [Source:HGNC Symbol;Acc:HGNC:14107]	protein_coding	147.637	-0.929046	0.280749	-0.718445	0.328647	-3.30916	0.000935747	0.0365105	245.552	188.839	140.412	197.249	80.1197	124.145	100.827	103.956
DZANK1	ENSG00000089091	55184	double zinc ribbon and ankyrin repeat domains 1 [Source:HGNC Symbol;Acc:HGNC:15858]	protein_coding	50.3187	-4.93771	1.49287	-0.016868	0.114221	-3.30754	0.000941207	0.0365647	219.58	1.21051	6.96259	161.533	9.3473	2.95583	0.960257	0
KCNQ4	ENSG00000117013	9132	potassium voltage-gated channel subfamily Q member 4 [Source:HGNC Symbol;Acc:HGNC:6298]	protein_coding	29.8118	-5.35003	1.61839	-0.0156912	0.113969	-3.30578	0.00094713	0.0365898	1.18054	164.629	1.16043	64.9381	2.67066	2.95583	0.960257	0
PDE4D	ENSG00000113448	5144	phosphodiesterase 4D [Source:HGNC Symbol;Acc:HGNC:8783]	protein_coding	25.075	-4.91429	1.48636	-0.0183624	0.114557	-3.30625	0.000945545	0.0365898	5.90269	1.21051	114.883	71.4319	1.33533	2.95583	2.88077	0
ATP5IF1	ENSG00000130770	93974	ATP synthase inhibitory factor subunit 1 [Source:HGNC Symbol;Acc:HGNC:871]	protein_coding	2367.83	0.377442	0.114322	0.311359	0.122235	3.30158	0.00096141	0.0370383	1966.77	1793.97	2259.36	2219.26	2975.11	2444.47	2773.22	2510.51
SUGT1	ENSG00000165416	10910	SGT1 homolog, MIS12 kinetochore complex assembly cochaperone [Source:HGNC Symbol;Acc:HGNC:16987]	protein_coding	995.336	0.319493	0.0968524	0.267756	0.101726	3.29876	0.000971123	0.0373089	959.777	840.091	828.548	907.51	1080.28	1167.55	1093.73	1085.19
ANO1	ENSG00000131620	55107	anoctamin 1 [Source:HGNC Symbol;Acc:HGNC:21625]	protein_coding	12.7421	-5.32391	1.6165	-0.0173963	0.114312	-3.29348	0.000989544	0.0376084	38.9577	3.63152	3.48129	51.9505	0	2.95583	0.960257	0
ATP5MC3	ENSG00000154518	518	ATP synthase membrane subunit c locus 3 [Source:HGNC Symbol;Acc:HGNC:843]	protein_coding	3204.14	0.488925	0.148543	0.392472	0.163823	3.29147	0.000996654	0.0376084	2273.71	2250.33	3438.36	2701.42	4074.09	3756.86	3441.56	3696.76
DNAJC13	ENSG00000138246	23317	DnaJ heat shock protein family (Hsp40) member C13 [Source:HGNC Symbol;Acc:HGNC:30343]	protein_coding	663.615	-0.852642	0.259074	-0.659792	0.30145	-3.29112	0.000997901	0.0376084	792.14	926.037	803.018	900.204	308.461	384.258	722.113	472.69
HRAS	ENSG00000174775	3265	HRas proto-oncogene, GTPase [Source:HGNC Symbol;Acc:HGNC:5173]	protein_coding	341.406	0.709086	0.215314	0.555679	0.246453	3.29327	0.000990307	0.0376084	232.566	214.26	324.921	265.029	344.515	422.684	511.817	415.46
PDE9A	ENSG00000160191	5152	phosphodiesterase 9A [Source:HGNC Symbol;Acc:HGNC:8795]	protein_coding	262.89	2.06868	0.628141	1.56992	0.772662	3.29334	0.000990054	0.0376084	144.026	124.682	54.5403	80.7667	180.269	972.468	97.9462	448.422
RPL10A	ENSG00000198755	4736	ribosomal protein L10a [Source:HGNC Symbol;Acc:HGNC:10299]	protein_coding	13321.7	0.473072	0.143592	0.381746	0.157685	3.29456	0.000985743	0.0376084	8811.53	10036.3	14197.9	11581.3	17435.4	14808.7	14775.5	14927.2
ZSWIM5	ENSG00000162415	57643	zinc finger SWIM-type containing 5 [Source:HGNC Symbol;Acc:HGNC:29299]	protein_coding	81.8992	3.66471	1.113	2.73744	1.45525	3.29265	0.000992483	0.0376084	5.90269	41.1572	1.16043	0.405863	41.3952	82.7633	297.68	184.729
FST	ENSG00000134363	10468	follistatin [Source:HGNC Symbol;Acc:HGNC:3971]	protein_coding	7.74488	5.72921	1.74206	0.016428	0.114113	3.28875	0.00100633	0.0378232	0	0	1.16043	0	16.0239	17.735	0.960257	26.0794
CPVL	ENSG00000106066	54504	carboxypeptidase vitellogenic like [Source:HGNC Symbol;Acc:HGNC:14399]	protein_coding	666.973	-0.362076	0.110126	-0.298667	0.117239	-3.28784	0.0010096	0.0378437	780.335	676.673	796.056	750.441	599.563	564.564	572.313	595.843
BCAS3	ENSG00000141376	54828	BCAS3 microtubule associated cell migration factor [Source:HGNC Symbol;Acc:HGNC:14347]	protein_coding	528.349	-0.502884	0.15306	-0.401689	0.169583	-3.28553	0.0010179	0.0380324	641.032	698.462	507.108	627.87	448.67	469.977	394.666	439.004
SVIP	ENSG00000198168	258010	small VCP interacting protein [Source:HGNC Symbol;Acc:HGNC:25238]	protein_coding	473.406	0.884885	0.269378	0.68432	0.314636	3.28492	0.00102012	0.0380324	367.147	421.256	213.519	330.778	817.221	449.286	558.87	629.167
NHS	ENSG00000188158	4810	NHS actin remodeling regulator [Source:HGNC Symbol;Acc:HGNC:7820]	protein_coding	48.7188	-5.3324	1.62408	-0.0145419	0.113742	-3.28333	0.00102589	0.038145	1.18054	1.21051	272.701	103.495	1.33533	8.86749	0.960257	0
PDCD5	ENSG00000105185	9141	programmed cell death 5 [Source:HGNC Symbol;Acc:HGNC:8764]	protein_coding	1565.23	0.52755	0.160756	0.418257	0.179016	3.28167	0.00103193	0.038267	1018.8	1141.51	1665.22	1303.63	1976.29	1761.68	1836.01	1818.68
UROD	ENSG00000126088	7389	uroporphyrinogen decarboxylase [Source:HGNC Symbol;Acc:HGNC:12591]	protein_coding	947.923	0.439391	0.134097	0.355311	0.146125	3.27665	0.00105045	0.0388498	684.712	800.145	909.778	826.743	1227.17	972.468	1095.65	1066.72
RSPH10B2	ENSG00000169402	728194	radial spoke head 10 homolog B2 [Source:HGNC Symbol;Acc:HGNC:34385]	protein_coding	5.6968	-5.82193	1.77723	-0.0156957	0.113959	-3.27583	0.0010535	0.0388591	14.1664	13.3156	3.48129	14.6111	0	0	0	0
POC1B	ENSG00000139323	282809	POC1 centriolar protein B [Source:HGNC Symbol;Acc:HGNC:30836]	protein_coding	318.467	0.757341	0.231451	0.587338	0.268064	3.27215	0.00106734	0.039265	286.871	181.576	234.407	240.677	420.629	487.712	299.6	396.263
NOLC1	ENSG00000166197	9221	nucleolar and coiled-body phosphoprotein 1 [Source:HGNC Symbol;Acc:HGNC:15608]	protein_coding	3240.4	-0.288139	0.0881072	-0.24374	0.0915398	-3.27032	0.00107425	0.0393106	3186.27	3597.62	3901.37	3573.62	3103.3	2734.14	2871.17	2955.67
PIGW	ENSG00000277161	284098	phosphatidylinositol glycan anchor biosynthesis class W [Source:HGNC Symbol;Acc:HGNC:23213]	protein_coding	281.631	0.558364	0.170724	0.442403	0.191003	3.27057	0.00107333	0.0393106	213.677	231.207	232.086	237.43	349.856	277.848	383.143	327.804
TUBA4A	ENSG00000127824	7277	tubulin alpha 4a [Source:HGNC Symbol;Acc:HGNC:12407]	protein_coding	40.7094	-5.08797	1.55727	-0.0157785	0.113982	-3.26724	0.00108601	0.0396364	1.18054	177.944	3.48129	131.905	1.33533	8.86749	0.960257	0
TRAPPC6A	ENSG00000007255	79090	trafficking protein particle complex 6A [Source:HGNC Symbol;Acc:HGNC:23069]	protein_coding	221.773	0.60803	0.186273	0.477686	0.210731	3.26418	0.00109782	0.0398577	151.109	185.207	183.348	183.45	248.371	257.157	307.282	258.259
ZNF700	ENSG00000196757	90592	zinc finger protein 700 [Source:HGNC Symbol;Acc:HGNC:25292]	protein_coding	39.5832	-4.58763	1.40528	-0.0188472	0.114673	-3.26456	0.00109633	0.0398577	30.694	134.366	1.16043	137.182	9.3473	2.95583	0.960257	0
HNRNPUL1	ENSG00000105323	11100	heterogeneous nuclear ribonucleoprotein U like 1 [Source:HGNC Symbol;Acc:HGNC:17011]	protein_coding	4736.61	0.263261	0.0806833	0.227177	0.08315	3.26289	0.00110283	0.0399349	4062.23	4407.45	4232.09	4504.27	4731.07	5695.89	5266.05	4993.85
METAP2	ENSG00000111142	10988	methionyl aminopeptidase 2 [Source:HGNC Symbol;Acc:HGNC:16672]	protein_coding	2920.21	0.342935	0.105153	0.283994	0.111411	3.26131	0.00110899	0.0399496	2770.72	2333.86	2592.4	2603.21	3764.29	3091.8	2950.87	3254.5
MRPS21	ENSG00000266472	54460	mitochondrial ribosomal protein S21 [Source:HGNC Symbol;Acc:HGNC:14046]	protein_coding	1388.59	0.442121	0.135541	0.356268	0.148109	3.26191	0.00110666	0.0399496	968.04	1125.77	1317.09	1290.64	1711.89	1735.07	1487.44	1472.76
DYNLT2	ENSG00000184786	6991	dynein light chain Tctex-type 2 [Source:HGNC Symbol;Acc:HGNC:11695]	protein_coding	75.8122	-2.54689	0.781878	-0.0468365	0.126865	-3.2574	0.00112439	0.0403716	305.759	41.1572	29.0108	142.458	40.0599	11.8233	19.2051	17.0241
RECQL5	ENSG00000108469	9400	RecQ like helicase 5 [Source:HGNC Symbol;Acc:HGNC:9950]	protein_coding	453.778	-0.652079	0.200217	-0.508221	0.228542	-3.25686	0.00112653	0.0403716	597.352	623.411	429.36	571.455	293.772	325.141	434.036	355.695
KALRN	ENSG00000160145	8997	kalirin RhoGEF kinase [Source:HGNC Symbol;Acc:HGNC:4814]	protein_coding	30.6171	-2.93403	0.901673	-0.0386963	0.122129	-3.25399	0.00113798	0.040677	73.1933	4.84203	80.0697	57.6325	12.018	8.86749	2.88077	5.43322
UQCRB	ENSG00000156467	7381	ubiquinol-cytochrome c reductase binding protein [Source:HGNC Symbol;Acc:HGNC:12582]	protein_coding	4509.1	0.510966	0.157068	0.406275	0.174666	3.25315	0.00114133	0.0406916	3187.45	2985.11	4966.65	3738	5373.36	4939.19	5586.77	5296.3
AMHR2	ENSG00000135409	269	anti-Mullerian hormone receptor type 2 [Source:HGNC Symbol;Acc:HGNC:465]	protein_coding	15.7243	3.74365	1.15229	2.76626	1.48507	3.24889	0.00115857	0.0408379	0	7.26304	0	1.62345	13.3533	44.3375	31.6885	27.5283
CFHR1	ENSG00000244414	3078	complement factor H related 1 [Source:HGNC Symbol;Acc:HGNC:4888]	protein_coding	40.4947	1.75535	0.54091	1.32109	0.659886	3.24518	0.00117375	0.0408379	22.4302	14.5261	19.7273	18.2638	72.1078	23.6466	96.0257	57.2299
ESR2	ENSG00000140009	2100	estrogen receptor 2 [Source:HGNC Symbol;Acc:HGNC:3468]	protein_coding	45.1338	-3.16752	0.976468	-0.0339075	0.119861	-3.24386	0.00117922	0.0408379	63.749	4.84203	165.942	91.3192	5.34132	2.95583	21.1257	5.79543
FERMT3	ENSG00000149781	83706	fermitin family member 3 [Source:HGNC Symbol;Acc:HGNC:23151]	protein_coding	18.9865	-5.18883	1.59977	-0.0165083	0.114127	-3.24349	0.00118076	0.0408379	95.6235	1.21051	2.32086	47.486	1.33533	2.95583	0.960257	0
FKBP9	ENSG00000122642	11328	FKBP prolyl isomerase 9 [Source:HGNC Symbol;Acc:HGNC:3725]	protein_coding	558.999	-0.644995	0.198618	-0.501016	0.227416	-3.24742	0.00116457	0.0408379	728.391	798.934	490.862	704.984	369.886	514.315	429.235	435.382
GVQW3	ENSG00000179240	100506127	GVQW motif containing 3 [Source:HGNC Symbol;Acc:HGNC:51239]	protein_coding	172.489	-1.76794	0.545017	-1.32273	0.670563	-3.24382	0.00117937	0.0408379	358.883	227.575	178.706	304.803	130.862	11.8233	96.9859	70.2696
MAF	ENSG00000178573	4094	MAF bZIP transcription factor [Source:HGNC Symbol;Acc:HGNC:6776]	protein_coding	29.1463	2.17271	0.668443	1.62525	0.829969	3.2504	0.00115243	0.0408379	20.0691	6.05253	5.80216	10.1466	60.0898	62.0725	21.1257	47.8123
MOGS	ENSG00000115275	7841	mannosyl-oligosaccharide glucosidase [Source:HGNC Symbol;Acc:HGNC:24862]	protein_coding	620.913	-1.00592	0.309687	-0.772961	0.366758	-3.24819	0.00116143	0.0408379	833.459	1168.14	424.718	890.869	313.802	390.17	547.346	398.798
RPS10	ENSG00000124614	6204	ribosomal protein S10 [Source:HGNC Symbol;Acc:HGNC:10383]	protein_coding	44.0212	-1.49214	0.459466	-1.12648	0.553558	-3.24755	0.00116402	0.0408379	88.5403	47.2097	58.0216	68.185	30.7126	11.8233	23.0462	24.6306
RTL10	ENSG00000215012	79680	retrotransposon Gag like 10 [Source:HGNC Symbol;Acc:HGNC:26112]	protein_coding	417.747	-0.693708	0.213655	-0.537048	0.246587	-3.24686	0.00116686	0.0408379	586.727	513.255	430.52	530.057	368.551	366.523	224.7	321.646
SUPV3L1	ENSG00000156502	6832	Suv3 like RNA helicase [Source:HGNC Symbol;Acc:HGNC:11471]	protein_coding	573.577	-0.464643	0.14323	-0.37075	0.157315	-3.24403	0.00117853	0.0408379	646.934	665.778	684.654	672.921	467.365	393.126	565.591	492.249
TRIM3	ENSG00000110171	10612	tripartite motif containing 3 [Source:HGNC Symbol;Acc:HGNC:10064]	protein_coding	185.553	-1.2215	0.3762	-0.919025	0.456183	-3.24695	0.0011665	0.0408379	330.55	300.206	128.808	275.581	77.4491	162.571	99.8667	109.389
NMUR1	ENSG00000171596	10316	neuromedin U receptor 1 [Source:HGNC Symbol;Acc:HGNC:4518]	protein_coding	24.6714	-5.08438	1.56819	-0.0166226	0.114158	-3.24219	0.00118616	0.0409224	2.36107	111.367	1.16043	75.8964	2.67066	2.95583	0.960257	0
DOCK7	ENSG00000116641	85440	dedicator of cytokinesis 7 [Source:HGNC Symbol;Acc:HGNC:19190]	protein_coding	843.139	-0.40801	0.12591	-0.33	0.136307	-3.2405	0.0011932	0.0409616	853.528	1117.3	907.457	972.448	747.784	670.974	746.12	729.5
FBL	ENSG00000105202	2091	fibrillarin [Source:HGNC Symbol;Acc:HGNC:3599]	protein_coding	5178.72	0.283805	0.0875727	0.235165	0.0908713	3.2408	0.00119196	0.0409616	4213.34	4550.29	5040.91	4876.85	6274.71	5500.8	5474.42	5498.42
MPP2	ENSG00000108852	4355	membrane palmitoylated protein 2 [Source:HGNC Symbol;Acc:HGNC:7220]	protein_coding	734.191	-0.971742	0.300635	-0.738236	0.357745	-3.2323	0.00122797	0.0420511	789.779	1514.34	545.403	1041.85	425.97	455.198	620.326	480.659
KIF1A	ENSG00000130294	547	kinesin family member 1A [Source:HGNC Symbol;Acc:HGNC:888]	protein_coding	1100.02	-0.384196	0.119151	-0.311639	0.128328	-3.22443	0.00126223	0.043118	1254.91	1308.56	1146.51	1265.89	1040.22	1019.76	806.616	957.695
LSM3	ENSG00000170860	27258	LSM3 homolog, U6 small nuclear RNA and mRNA degradation associated [Source:HGNC Symbol;Acc:HGNC:17874]	protein_coding	1509.58	0.513404	0.159259	0.405266	0.177759	3.2237	0.00126547	0.0431223	996.373	1112.46	1601.39	1264.67	1937.56	1717.34	1700.62	1746.24
EDF1	ENSG00000107223	8721	endothelial differentiation related factor 1 [Source:HGNC Symbol;Acc:HGNC:3164]	protein_coding	1840.55	0.454302	0.141114	0.362402	0.155223	3.21939	0.00128466	0.0436688	1312.76	1353.35	1821.88	1715.58	2127.18	2379.44	2071.27	1942.92
ACTN1	ENSG00000072110	87	actinin alpha 1 [Source:HGNC Symbol;Acc:HGNC:163]	protein_coding	954.93	-0.457557	0.142198	-0.364171	0.15645	-3.21775	0.00129201	0.0437045	1045.96	1238.35	1014.22	1126.27	691.7	759.649	957.376	805.927
TUBB	ENSG00000196230	203068	tubulin beta class I [Source:HGNC Symbol;Acc:HGNC:20778]	protein_coding	15222.9	-0.176626	0.0548823	-0.157439	0.0548586	-3.21826	0.00128971	0.0437045	15578.4	15737.8	16933	16347.4	14300	14941.7	13627	14317.6
DLX5	ENSG00000105880	1749	distal-less homeobox 5 [Source:HGNC Symbol;Acc:HGNC:2918]	protein_coding	24.3924	-4.85242	1.51044	-0.0174277	0.114327	-3.21258	0.00131548	0.0440687	3.54161	2.42101	99.7971	81.1726	1.33533	5.91166	0.960257	0
RPL35	ENSG00000136942	11224	ribosomal protein L35 [Source:HGNC Symbol;Acc:HGNC:10344]	protein_coding	14631.3	0.410062	0.127635	0.328809	0.138641	3.21276	0.00131467	0.0440687	10347.4	11061.6	14652.8	14194.7	17580.9	16922.1	17376.8	14914.2
TEX45	ENSG00000198723	374877	testis expressed 45 [Source:HGNC Symbol;Acc:HGNC:24745]	protein_coding	19.7417	-5.36673	1.67048	-0.0153958	0.113908	-3.21269	0.001315	0.0440687	1.18054	2.42101	96.3158	54.3856	2.67066	0	0.960257	0
THAP12	ENSG00000137492	5612	THAP domain containing 12 [Source:HGNC Symbol;Acc:HGNC:9440]	protein_coding	969.332	0.481441	0.149856	0.381239	0.166201	3.21269	0.001315	0.0440687	805.126	647.621	956.195	822.684	1022.86	1271.01	1113.9	1115.26
C20orf204	ENSG00000196421	284739	chromosome 20 open reading frame 204 [Source:HGNC Symbol;Acc:HGNC:27655]	protein_coding	29.237	-5.12187	1.59578	-0.0157304	0.113973	-3.20965	0.00132898	0.0442	1.18054	148.892	1.16043	75.4905	1.33533	2.95583	2.88077	0
LETM2	ENSG00000165046	137994	leucine zipper and EF-hand containing transmembrane protein 2 [Source:HGNC Symbol;Acc:HGNC:14648]	protein_coding	90.4884	-2.49371	0.776812	-0.0462545	0.12645	-3.21019	0.00132648	0.0442	164.095	263.89	10.4439	176.956	42.7305	14.7792	30.7282	20.284
TCEAL9	ENSG00000185222	51186	transcription elongation factor A like 9 [Source:HGNC Symbol;Acc:HGNC:30084]	protein_coding	1888.59	0.529529	0.164933	0.415504	0.185146	3.21056	0.00132476	0.0442	1241.93	1349.71	2030.75	1557.7	2274.06	2429.69	2005.98	2218.93
USP37	ENSG00000135913	57695	ubiquitin specific peptidase 37 [Source:HGNC Symbol;Acc:HGNC:20063]	protein_coding	780.989	0.424868	0.1324	0.340528	0.144474	3.20896	0.00133215	0.0442	645.754	731.146	611.547	677.791	1030.87	877.882	785.49	887.426
PRDM5	ENSG00000138738	11107	PR/SET domain 5 [Source:HGNC Symbol;Acc:HGNC:9349]	protein_coding	156.418	1.13791	0.354937	0.85254	0.430582	3.20594	0.0013462	0.0445597	139.303	47.2097	105.599	98.2189	237.689	233.511	172.846	216.966
PPP1R3F	ENSG00000049769	89801	protein phosphatase 1 regulatory subunit 3F [Source:HGNC Symbol;Acc:HGNC:14944]	protein_coding	78.8773	-5.10594	1.59481	-0.0144056	0.113719	-3.2016	0.00136664	0.0451285	1.18054	395.836	1.16043	215.107	1.33533	2.95583	13.4436	0
LDHC	ENSG00000166796	3948	lactate dehydrogenase C [Source:HGNC Symbol;Acc:HGNC:6544]	protein_coding	77.1809	1.21584	0.379989	0.904496	0.465825	3.19967	0.00137584	0.0452167	38.9577	54.4728	41.7755	48.2977	80.1197	168.482	80.6616	104.68
NDUFA4	ENSG00000189043	4697	NDUFA4 mitochondrial complex associated [Source:HGNC Symbol;Acc:HGNC:7687]	protein_coding	2594.08	0.441233	0.13789	0.351768	0.151293	3.19989	0.00137479	0.0452167	1975.04	1875.07	2717.73	2235.09	3371.71	2784.39	2848.12	2945.53
TMEM128	ENSG00000132406	85013	transmembrane protein 128 [Source:HGNC Symbol;Acc:HGNC:28201]	protein_coding	191.377	1.47272	0.460683	1.09557	0.56912	3.19681	0.00138958	0.0455606	59.0269	151.313	99.7971	96.1895	502.084	177.35	147.88	297.378
SHISAL2B	ENSG00000145642	100132916	shisa like 2B [Source:HGNC Symbol;Acc:HGNC:34236]	protein_coding	21.8132	-2.39565	0.75049	-0.0529258	0.130969	-3.19212	0.00141234	0.0461976	60.2074	29.0522	20.8878	38.1511	10.6826	0	8.64231	6.88208
CEP83	ENSG00000173588	51134	centrosomal protein 83 [Source:HGNC Symbol;Acc:HGNC:17966]	protein_coding	349.181	1.03086	0.323151	0.774244	0.390441	3.19003	0.00142256	0.0464222	151.109	249.364	287.787	226.472	395.257	718.267	295.759	469.43
CTTNBP2	ENSG00000077063	83992	cortactin binding protein 2 [Source:HGNC Symbol;Acc:HGNC:15679]	protein_coding	115.556	-1.15472	0.362374	-0.860346	0.439307	-3.18654	0.00143986	0.0468353	219.58	125.893	128.808	167.621	77.4491	38.4258	93.1449	73.5295
MICALL2	ENSG00000164877	79778	MICAL like 2 [Source:HGNC Symbol;Acc:HGNC:29672]	protein_coding	42.645	4.58906	1.44033	3.23458	2.1459	3.18612	0.00144197	0.0468353	1.18054	1.21051	11.6043	0	192.287	2.95583	7.68206	124.24
SP5	ENSG00000204335	389058	Sp5 transcription factor [Source:HGNC Symbol;Acc:HGNC:14529]	protein_coding	10.743	5.33843	1.67623	0.0171446	0.114268	3.18479	0.00144858	0.0469401	1.18054	0	1.16043	0	6.67664	50.2491	0.960257	25.7172
PCYT1B	ENSG00000102230	9468	phosphate cytidylyltransferase 1, choline, beta [Source:HGNC Symbol;Acc:HGNC:8755]	protein_coding	20.5944	-5.01382	1.57479	-0.0167792	0.114193	-3.1838	0.00145354	0.0469909	1.18054	84.7354	8.12302	65.7498	4.00599	0	0.960257	0
HINT1	ENSG00000169567	3094	histidine triad nucleotide binding protein 1 [Source:HGNC Symbol;Acc:HGNC:4912]	protein_coding	3349.81	0.46134	0.144946	0.364985	0.16021	3.18285	0.00145834	0.0470365	2219.41	2602.59	3600.82	2852.81	4080.76	3718.44	3876.56	3847.08
FAM229B	ENSG00000203778	619208	family with sequence similarity 229 member B [Source:HGNC Symbol;Acc:HGNC:33858]	protein_coding	534.845	0.451361	0.141881	0.357796	0.156157	3.18126	0.00146636	0.0470472	417.91	445.466	482.739	465.525	604.904	537.961	718.272	605.985
TXN	ENSG00000136810	7295	thioredoxin [Source:HGNC Symbol;Acc:HGNC:12435]	protein_coding	5520.82	0.397191	0.124842	0.319188	0.135274	3.18156	0.00146484	0.0470472	3933.55	4342.09	5842.77	4943.01	6565.81	6121.53	6340.58	6077.23
ZNF333	ENSG00000160961	84449	zinc finger protein 333 [Source:HGNC Symbol;Acc:HGNC:15624]	protein_coding	137.231	-1.23397	0.387949	-0.911529	0.477738	-3.18077	0.00146885	0.0470472	270.343	192.471	102.118	204.961	52.0778	91.6308	102.747	81.4983
RAN	ENSG00000132341	5901	RAN, member RAS oncogene family [Source:HGNC Symbol;Acc:HGNC:9846]	protein_coding	9520.75	0.36754	0.115734	0.299736	0.124167	3.17574	0.00149456	0.0477605	7023.02	7804.13	10014.5	8416.38	11737.5	10395.7	10152.8	10621.9
RPS5	ENSG00000083845	6193	ribosomal protein S5 [Source:HGNC Symbol;Acc:HGNC:10426]	protein_coding	14928.2	0.528897	0.16661	0.421299	0.186603	3.17447	0.00150113	0.0478601	9268.4	10251.8	14945.2	14418.7	20076.7	16984.2	18480.1	15000.8
KCNMA1	ENSG00000156113	3778	potassium calcium-activated channel subfamily M alpha 1 [Source:HGNC Symbol;Acc:HGNC:6284]	protein_coding	9.7042	-4.95663	1.56246	-0.0190783	0.114712	-3.17232	0.00151226	0.0481044	1.18054	31.4732	15.0856	27.5987	1.33533	0	0.960257	0
CDC37	ENSG00000105401	11140	cell division cycle 37, HSP90 cochaperone [Source:HGNC Symbol;Acc:HGNC:1735]	protein_coding	2306.67	0.296931	0.0937163	0.246731	0.0979775	3.1684	0.0015328	0.0486462	1996.29	2332.65	1882.22	2064.63	2440.98	2704.59	2464.98	2567.01
RPS16	ENSG00000105193	6217	ribosomal protein S16 [Source:HGNC Symbol;Acc:HGNC:10396]	protein_coding	15669.6	0.457888	0.144601	0.361351	0.159916	3.16656	0.00154255	0.0488439	10460.7	11588.2	15781.9	14981.2	19953.8	16910.3	19584.4	16096.4
RASL11A	ENSG00000122035	387496	RAS like family 11 member A [Source:HGNC Symbol;Acc:HGNC:23802]	protein_coding	103.996	-1.47742	0.467047	-1.08	0.584601	-3.16333	0.00155976	0.0492763	218.399	118.63	111.401	164.78	24.0359	50.2491	91.2244	53.2455
PPFIA2	ENSG00000139220	8499	PTPRF interacting protein alpha 2 [Source:HGNC Symbol;Acc:HGNC:9246]	protein_coding	15.2301	-5.56892	1.7618	-0.0144659	0.113725	-3.16092	0.00157272	0.0495728	1.18054	84.7354	1.16043	32.469	1.33533	0	0.960257	0
POLR2J3	ENSG00000168255		RNA polymerase II subunit J3 [Source:HGNC Symbol;Acc:HGNC:33853]	protein_coding	231.297	-0.635435	0.201155	-0.48396	0.232849	-3.15894	0.00158347	0.0497984	324.648	283.258	228.605	287.757	194.958	189.173	156.522	185.454
COX18	ENSG00000163626	285521	cytochrome c oxidase assembly factor COX18 [Source:HGNC Symbol;Acc:HGNC:26801]	protein_coding	202.226	1.07261	0.33967	0.794539	0.414754	3.15779	0.00158972	0.0498818	80.2765	123.472	189.15	130.282	235.018	195.085	372.58	291.945
ABCB1	ENSG00000085563	5243	ATP binding cassette subfamily B member 1 [Source:HGNC Symbol;Acc:HGNC:40]	protein_coding	164.186	-1.25686	0.398377	-0.914254	0.49959	-3.15495	0.00160526	0.049887	291.593	194.892	186.829	248.794	120.18	135.968	40.3308	94.9002
RASA1	ENSG00000145715	5921	RAS p21 protein activator 1 [Source:HGNC Symbol;Acc:HGNC:9871]	protein_coding	286.366	0.605358	0.191905	0.46339	0.220689	3.15448	0.00160787	0.049887	230.205	171.892	270.38	234.589	343.18	357.656	347.613	335.411
RSF1	ENSG00000048649	51773	remodeling and spacing factor 1 [Source:HGNC Symbol;Acc:HGNC:18118]	protein_coding	1150.64	-0.638675	0.202422	-0.485434	0.234933	-3.15516	0.0016041	0.049887	1447.34	1544.61	1139.54	1462.32	781.167	1253.27	689.464	887.426
SKI	ENSG00000157933	6497	SKI proto-oncogene [Source:HGNC Symbol;Acc:HGNC:10896]	protein_coding	520.944	-0.617274	0.19562	-0.471291	0.225435	-3.15547	0.00160242	0.049887	736.655	633.095	504.788	650.598	331.162	393.126	507.016	411.113
TMEM198	ENSG00000188760	130612	transmembrane protein 198 [Source:HGNC Symbol;Acc:HGNC:33704]	protein_coding	80.795	1.39983	0.443725	1.02344	0.555921	3.15472	0.00160653	0.049887	17.7081	60.5253	55.7007	43.4273	86.7964	135.968	135.396	110.838
SLC18B1	ENSG00000146409	116843	solute carrier family 18 member B1 [Source:HGNC Symbol;Acc:HGNC:21573]	protein_coding	795.181	-0.519539	0.164755	-0.403245	0.185801	-3.15341	0.00161373	0.0499573	879.5	824.355	1086.16	951.749	514.102	768.516	676.021	661.041
RPL30	ENSG00000156482	6156	ribosomal protein L30 [Source:HGNC Symbol;Acc:HGNC:10333]	protein_coding	10141.3	0.415116	0.131688	0.331965	0.143786	3.15227	0.00162008	0.0500422	7459.81	7799.29	10352.2	9157.89	13800.6	10608.5	10897	11055.1
BTBD8	ENSG00000189195	284697	BTB domain containing 8 [Source:HGNC Symbol;Acc:HGNC:21019]	protein_coding	100.713	-1.40988	0.447849	-1.02832	0.559834	-3.14811	0.0016433	0.0506465	184.164	84.7354	168.263	150.575	33.3832	38.4258	92.1847	53.97
PSMC6	ENSG00000100519	5706	proteasome 26S subunit, ATPase 6 [Source:HGNC Symbol;Acc:HGNC:9553]	protein_coding	1023.24	0.457543	0.145451	0.359344	0.161109	3.14567	0.00165706	0.0509572	659.92	935.721	978.243	876.258	1220.49	1135.04	1212.8	1167.42
C16orf96	ENSG00000205832	342346	chromosome 16 open reading frame 96 [Source:HGNC Symbol;Acc:HGNC:40031]	protein_coding	6.83144	5.20845	1.65644	0.0184779	0.114582	3.14437	0.00166447	0.0510719	0	0	0	0.811726	14.6886	2.95583	24.9667	11.2286
COBL	ENSG00000106078	23242	cordon-bleu WH2 repeat protein [Source:HGNC Symbol;Acc:HGNC:22199]	protein_coding	232.375	-0.862028	0.274606	-0.638509	0.331456	-3.13915	0.00169439	0.0517611	328.189	377.678	178.706	313.326	154.898	180.306	160.363	165.532
PHF20	ENSG00000025293	51230	PHD finger protein 20 [Source:HGNC Symbol;Acc:HGNC:16098]	protein_coding	683.643	0.72847	0.232027	0.54722	0.273963	3.13958	0.00169187	0.0517611	724.85	334.1	488.541	512.605	886.658	750.781	899.761	871.85
KATNAL2	ENSG00000167216	83473	katanin catalytic subunit A1 like 2 [Source:HGNC Symbol;Acc:HGNC:25387]	protein_coding	14.6475	4.07736	1.29957	2.83523	1.85079	3.13747	0.0017041	0.0519433	1.18054	0	5.80216	0	16.0239	35.47	16.3244	42.3791
CENPW	ENSG00000203760	387103	centromere protein W [Source:HGNC Symbol;Acc:HGNC:21488]	protein_coding	821.418	0.39169	0.12492	0.312457	0.135499	3.13553	0.00171545	0.0520604	596.171	726.304	754.28	760.993	909.359	960.645	985.224	878.37
PPP2R3C	ENSG00000092020	55012	protein phosphatase 2 regulatory subunit B''gamma [Source:HGNC Symbol;Acc:HGNC:17485]	protein_coding	555.534	0.535534	0.170776	0.412894	0.193523	3.13589	0.00171336	0.0520604	381.314	401.888	566.29	466.337	694.371	594.122	698.107	641.844
DNHD1	ENSG00000179532	144132	dynein heavy chain domain 1 [Source:HGNC Symbol;Acc:HGNC:26532]	protein_coding	115.322	-0.899754	0.287189	-0.665978	0.34617	-3.13297	0.00173049	0.0524021	133.401	187.628	132.289	150.981	76.1137	59.1166	100.827	82.2227
SCD5	ENSG00000145284	79966	stearoyl-CoA desaturase 5 [Source:HGNC Symbol;Acc:HGNC:21088]	protein_coding	196.492	-1.13751	0.363309	-0.82603	0.454107	-3.13097	0.00174231	0.0526452	182.983	407.941	203.075	283.292	134.868	162.571	75.8603	121.342
PPARD	ENSG00000112033	5467	peroxisome proliferator activated receptor delta [Source:HGNC Symbol;Acc:HGNC:9235]	protein_coding	155.815	-1.72966	0.552979	-0.0764071	0.153137	-3.1279	0.0017606	0.0530821	173.539	432.151	88.1928	263.405	125.521	65.0283	34.5692	64.112
PDS5B	ENSG00000083642	23047	PDS5 cohesin associated factor B [Source:HGNC Symbol;Acc:HGNC:20418]	protein_coding	490.728	-0.924349	0.296157	-0.679403	0.361173	-3.12114	0.00180153	0.0540809	735.475	490.255	666.087	682.256	202.97	289.671	523.34	335.773
TYW1	ENSG00000198874	55253	tRNA-yW synthesizing protein 1 homolog [Source:HGNC Symbol;Acc:HGNC:25598]	protein_coding	453.864	-0.698747	0.223873	-0.52163	0.265141	-3.12118	0.00180127	0.0540809	505.27	526.57	634.756	571.455	319.144	478.845	246.786	348.088
MDH1	ENSG00000014641	4190	malate dehydrogenase 1 [Source:HGNC Symbol;Acc:HGNC:6970]	protein_coding	2808.42	0.467845	0.149998	0.366901	0.167037	3.119	0.00181467	0.0541397	2230.03	1907.76	2916.16	2371.05	3644.11	3405.12	2744.41	3248.7
MYD88	ENSG00000172936	4615	MYD88 innate immune signal transduction adaptor [Source:HGNC Symbol;Acc:HGNC:7562]	protein_coding	65.3597	-1.9934	0.639132	-0.0619091	0.138165	-3.11891	0.0018152	0.0541397	181.803	98.051	29.0108	110.801	24.0359	11.8233	44.1718	23.1817
ZDHHC4	ENSG00000136247	55146	zinc finger DHHC-type palmitoyltransferase 4 [Source:HGNC Symbol;Acc:HGNC:18471]	protein_coding	686.858	0.348595	0.111729	0.281468	0.119387	3.12002	0.0018084	0.0541397	569.019	618.569	572.093	649.787	803.868	801.03	758.603	721.893
SLC1A3	ENSG00000079215	6507	solute carrier family 1 member 3 [Source:HGNC Symbol;Acc:HGNC:10941]	protein_coding	332.645	-0.821111	0.263364	-0.604815	0.318712	-3.11778	0.0018222	0.0541855	550.13	314.732	388.744	439.55	218.994	328.097	181.489	239.424
TCTN1	ENSG00000204852	79600	tectonic family member 1 [Source:HGNC Symbol;Acc:HGNC:26113]	protein_coding	301.158	-0.897524	0.287908	-0.659351	0.350111	-3.1174	0.00182454	0.0541855	225.483	459.992	483.9	401.399	240.359	159.615	226.621	211.895
RPS27A	ENSG00000143947	6233	ribosomal protein S27a [Source:HGNC Symbol;Acc:HGNC:10417]	protein_coding	20275.6	0.364657	0.117004	0.292643	0.125764	3.11661	0.00182943	0.0542143	16243	15045.4	21696.6	17918	24043.9	23584.6	21016.2	22656.9
MYO19	ENSG00000278259	80179	myosin XIX [Source:HGNC Symbol;Acc:HGNC:26234]	protein_coding	1148.02	-0.49003	0.157342	-0.378733	0.176576	-3.11442	0.00184305	0.0545015	1356.44	1601.5	1028.14	1382.37	1041.56	848.324	977.542	948.278
LSM8	ENSG00000128534	51691	LSM8 homolog, U6 small nuclear RNA associated [Source:HGNC Symbol;Acc:HGNC:20471]	protein_coding	818.01	0.36108	0.116061	0.289948	0.124629	3.11113	0.00186375	0.0549966	624.504	749.303	738.034	750.035	1002.83	907.44	886.317	885.614
ATG13	ENSG00000175224	9776	autophagy related 13 [Source:HGNC Symbol;Acc:HGNC:29091]	protein_coding	935.232	-0.312771	0.100629	-0.255851	0.106	-3.10818	0.00188245	0.0554305	1061.3	1076.14	956.195	1052.4	902.682	806.942	785.49	840.7
CAV3	ENSG00000182533	859	caveolin 3 [Source:HGNC Symbol;Acc:HGNC:1529]	protein_coding	41.8765	-2.45035	0.789088	-0.0450922	0.125634	-3.1053	0.00190087	0.0557362	14.1664	159.787	33.6525	75.8964	18.6946	8.86749	13.4436	10.5042
OSGEP	ENSG00000092094	55644	O-sialoglycoprotein endopeptidase [Source:HGNC Symbol;Acc:HGNC:18028]	protein_coding	565.698	-0.327225	0.105361	-0.26551	0.111633	-3.10574	0.00189804	0.0557362	629.226	619.779	639.398	631.117	470.036	505.447	519.499	511.085
SLC46A3	ENSG00000139508	283537	solute carrier family 46 member 3 [Source:HGNC Symbol;Acc:HGNC:27501]	protein_coding	96.9667	1.08776	0.350852	0.787289	0.438567	3.10035	0.00193291	0.0565561	60.2074	37.5257	84.7115	64.5322	149.557	150.747	99.8667	128.586
NDRG3	ENSG00000101079	57446	NDRG family member 3 [Source:HGNC Symbol;Acc:HGNC:14462]	protein_coding	465.969	-0.646678	0.208768	-0.485323	0.244364	-3.09759	0.00195098	0.0569646	720.128	501.15	469.975	587.284	320.479	316.274	448.44	364.026
RTL5	ENSG00000242732	340526	retrotransposon Gag like 5 [Source:HGNC Symbol;Acc:HGNC:29430]	protein_coding	49.3451	-3.54219	1.14462	-0.0249788	0.116378	-3.09463	0.00197058	0.0574084	217.219	4.84203	39.4547	100.654	4.00599	14.7792	13.4436	0.362214
TBX20	ENSG00000164532	57057	T-box transcription factor 20 [Source:HGNC Symbol;Acc:HGNC:11598]	protein_coding	40.9228	3.05287	0.986692	2.11192	1.41011	3.09405	0.00197446	0.0574084	1.18054	20.5786	10.4439	3.65277	10.6826	35.47	158.442	86.9315
ZNF460	ENSG00000197714	10794	zinc finger protein 460 [Source:HGNC Symbol;Acc:HGNC:21628]	protein_coding	46.952	-4.78774	1.54846	-0.0153821	0.113898	-3.09194	0.00198854	0.0576968	1.18054	242.101	1.16043	117.7	6.67664	2.95583	3.84103	0
CCT2	ENSG00000166226	10576	chaperonin containing TCP1 subunit 2 [Source:HGNC Symbol;Acc:HGNC:1615]	protein_coding	5841.93	0.356656	0.115428	0.285375	0.123894	3.08986	0.00200254	0.0578668	4540.35	4819.03	5955.33	5175.57	7348.31	6694.96	5688.56	6513.34
TIMM8B	ENSG00000150779	26521	translocase of inner mitochondrial membrane 8 homolog B [Source:HGNC Symbol;Acc:HGNC:11818]	protein_coding	648.547	0.645818	0.209098	0.482329	0.24552	3.08859	0.00201109	0.0578668	351.8	479.361	683.494	509.358	825.233	730.09	827.741	781.297
TSPAN14	ENSG00000108219	81619	tetraspanin 14 [Source:HGNC Symbol;Acc:HGNC:23303]	protein_coding	299.764	-0.586691	0.189942	-0.442208	0.219474	-3.08879	0.00200975	0.0578668	439.16	321.995	316.798	365.277	235.018	209.864	266.951	243.046
VPS11	ENSG00000160695	55823	VPS11 core subunit of CORVET and HOPS complexes [Source:HGNC Symbol;Acc:HGNC:14583]	protein_coding	340.791	-0.787443	0.254897	-0.576381	0.308505	-3.08926	0.00200657	0.0578668	572.561	290.522	415.434	445.638	196.293	286.716	268.872	250.29
RASSF8	ENSG00000123094	11228	Ras association domain family member 8 [Source:HGNC Symbol;Acc:HGNC:13232]	protein_coding	183.22	-0.62329	0.201879	-0.466816	0.235375	-3.08744	0.00201888	0.0579708	207.775	227.575	234.407	221.601	121.515	135.968	168.045	148.87
STARD3NL	ENSG00000010270	83930	STARD3 N-terminal like [Source:HGNC Symbol;Acc:HGNC:19169]	protein_coding	826.84	0.418162	0.135471	0.32749	0.149014	3.08672	0.00202376	0.0579907	754.363	691.199	666.087	713.913	1030.87	1043.41	774.927	939.947
TRAF3IP2	ENSG00000056972	10758	TRAF3 interacting protein 2 [Source:HGNC Symbol;Acc:HGNC:1343]	protein_coding	77.5632	-0.982595	0.318425	-0.707951	0.396743	-3.08579	0.00203009	0.0580521	125.137	105.314	76.5885	103.495	48.0718	62.0725	45.1321	54.6944
HMGN5	ENSG00000198157	79366	high mobility group nucleosome binding domain 5 [Source:HGNC Symbol;Acc:HGNC:8013]	protein_coding	2565.35	0.719896	0.233862	0.521555	0.28212	3.07829	0.00208193	0.059412	1633.86	1285.56	2940.53	1890.92	2709.38	3789.38	3016.17	3257.03
ABCC4	ENSG00000125257	10257	ATP binding cassette subfamily C member 4 [Source:HGNC Symbol;Acc:HGNC:55]	protein_coding	608.521	-0.473174	0.153749	-0.363849	0.172441	-3.07757	0.00208699	0.0594343	837.001	565.306	709.023	717.16	503.419	523.182	498.373	514.707
ZNF236	ENSG00000130856	7776	zinc finger protein 236 [Source:HGNC Symbol;Acc:HGNC:13028]	protein_coding	205.635	-0.710774	0.231269	-0.522492	0.276823	-3.07337	0.00211658	0.0601533	323.467	197.313	237.888	260.564	142.88	174.394	148.84	159.737
MFAP2	ENSG00000117122	4237	microfibril associated protein 2 [Source:HGNC Symbol;Acc:HGNC:7033]	protein_coding	248.935	-0.893776	0.291108	-0.642574	0.36196	-3.07025	0.00213877	0.060536	315.203	371.625	266.899	335.243	105.491	257.157	167.085	172.776
PTPN9	ENSG00000169410	5780	protein tyrosine phosphatase non-receptor type 9 [Source:HGNC Symbol;Acc:HGNC:9661]	protein_coding	546.447	0.799137	0.260241	0.583175	0.316703	3.07076	0.00213514	0.060536	428.535	458.782	314.477	392.875	936.065	712.355	419.632	708.854
FN3KRP	ENSG00000141560	79672	fructosamine 3 kinase related protein [Source:HGNC Symbol;Acc:HGNC:25700]	protein_coding	494.849	-0.445806	0.145362	-0.344518	0.161604	-3.06687	0.00216316	0.0611015	521.797	634.305	552.365	575.92	479.383	393.126	377.381	424.515
BOLA2B	ENSG00000169627	552900	bolA family member 2B [Source:HGNC Symbol;Acc:HGNC:32479]	protein_coding	1288.96	0.419124	0.136696	0.327057	0.150526	3.0661	0.00216873	0.0611343	957.416	1005.93	1206.85	1236.66	1693.2	1451.31	1431.74	1328.6
COX6B1	ENSG00000126267	1340	cytochrome c oxidase subunit 6B1 [Source:HGNC Symbol;Acc:HGNC:2280]	protein_coding	3007.39	0.438319	0.143071	0.340617	0.158715	3.06364	0.00218661	0.0613453	2299.69	2085.7	2869.75	2952.65	3889.81	3609.07	3333.05	3019.42
PSMA5	ENSG00000143106	5686	proteasome 20S subunit alpha 5 [Source:HGNC Symbol;Acc:HGNC:9534]	protein_coding	2206.45	0.499892	0.163137	0.381781	0.18486	3.06424	0.0021822	0.0613453	1388.31	1757.66	2328.99	1834.91	2840.24	2677.98	2248.92	2574.62
VPS37B	ENSG00000139722	79720	VPS37B subunit of ESCRT-I [Source:HGNC Symbol;Acc:HGNC:25754]	protein_coding	384.224	-0.588019	0.191959	-0.440205	0.222657	-3.06325	0.00218948	0.0613453	476.937	462.413	440.964	472.425	269.736	242.378	395.626	313.316
ABCB6	ENSG00000115657	10058	ATP binding cassette subfamily B member 6 (Langereis blood group) [Source:HGNC Symbol;Acc:HGNC:47]	protein_coding	27.4037	-4.97892	1.62721	-0.0147481	0.113767	-3.05979	0.00221491	0.061808	1.18054	127.103	1.16043	81.5785	1.33533	5.91166	0.960257	0
GPC2	ENSG00000213420	221914	glypican 2 [Source:HGNC Symbol;Acc:HGNC:4450]	protein_coding	63.6558	1.43735	0.469741	1.01374	0.611042	3.05988	0.00221427	0.061808	28.3329	52.0518	23.2086	34.9042	125.521	44.3375	105.628	95.2624
SCPEP1	ENSG00000121064	59342	serine carboxypeptidase 1 [Source:HGNC Symbol;Acc:HGNC:29507]	protein_coding	594.761	-0.783204	0.256118	-0.568632	0.311718	-3.05798	0.00222835	0.0620257	923.18	859.46	435.162	794.274	514.102	351.744	454.202	425.964
UBAP1	ENSG00000165006	51271	ubiquitin associated protein 1 [Source:HGNC Symbol;Acc:HGNC:12461]	protein_coding	672.001	-0.631143	0.206422	-0.467083	0.242995	-3.05754	0.00223165	0.0620257	808.668	986.563	630.114	846.63	466.03	434.507	680.822	522.676
UHMK1	ENSG00000152332	127933	U2AF homology motif kinase 1 [Source:HGNC Symbol;Acc:HGNC:19683]	protein_coding	1129.67	-0.392913	0.128593	-0.307912	0.140241	-3.05549	0.00224697	0.0623263	1500.46	1223.82	1093.13	1317.03	990.814	901.528	1035.16	975.444
INTS2	ENSG00000108506	57508	integrator complex subunit 2 [Source:HGNC Symbol;Acc:HGNC:29241]	protein_coding	645.807	-0.620624	0.203306	-0.456404	0.239567	-3.05266	0.00226826	0.0627914	775.613	841.302	702.061	801.985	507.425	676.885	356.255	504.927
EIF3K	ENSG00000178982	27335	eukaryotic translation initiation factor 3 subunit K [Source:HGNC Symbol;Acc:HGNC:24656]	protein_coding	2467.14	0.375405	0.123029	0.296278	0.133359	3.05135	0.00227815	0.0629394	1966.77	1798.81	2518.14	2301.24	2808.2	2938.1	2783.78	2622.07
TXNDC12	ENSG00000117862	51060	thioredoxin domain containing 12 [Source:HGNC Symbol;Acc:HGNC:24626]	protein_coding	90.2465	1.20341	0.394727	0.847996	0.510125	3.04871	0.00229829	0.0633696	24.7913	71.4199	67.305	54.7915	145.551	130.057	105.628	122.428
GTF3C2	ENSG00000115207	2976	general transcription factor IIIC subunit 2 [Source:HGNC Symbol;Acc:HGNC:4665]	protein_coding	880.408	-0.48253	0.158422	-0.367674	0.179119	-3.04585	0.0023202	0.063847	845.265	1146.35	1061.79	1042.66	674.341	895.617	640.491	736.744
RIN2	ENSG00000132669	54453	Ras and Rab interactor 2 [Source:HGNC Symbol;Acc:HGNC:18750]	protein_coding	23.5671	-4.67268	1.53517	-0.0164816	0.114114	-3.04375	0.00233647	0.0641674	3.54161	108.946	1.16043	66.9674	4.00599	2.95583	0.960257	0
EMC10	ENSG00000161671	284361	ER membrane protein complex subunit 10 [Source:HGNC Symbol;Acc:HGNC:27609]	protein_coding	1181.48	0.507308	0.166727	0.384055	0.189815	3.04275	0.00234428	0.0642545	795.682	871.565	1250.94	988.276	1404.77	1220.76	1548.89	1370.98
TBRG1	ENSG00000154144	84897	transforming growth factor beta regulator 1 [Source:HGNC Symbol;Acc:HGNC:29551]	protein_coding	272.843	-1.09554	0.360291	-0.766139	0.467762	-3.04072	0.00236014	0.0645618	355.342	390.994	337.685	395.311	97.479	316.274	121.953	167.705
AGBL5	ENSG00000084693	60509	ATP/GTP binding protein like 5 [Source:HGNC Symbol;Acc:HGNC:26147]	protein_coding	689.373	-0.455974	0.150076	-0.348845	0.168067	-3.0383	0.00237921	0.0647047	727.211	686.357	975.923	798.738	584.874	600.034	549.267	592.583
BAHCC1	ENSG00000266074	57597	BAH domain and coiled-coil containing 1 [Source:HGNC Symbol;Acc:HGNC:29279]	protein_coding	256.489	0.759237	0.249891	0.550522	0.304195	3.03828	0.00237936	0.0647047	171.178	131.945	265.739	193.191	331.162	310.362	333.209	315.127
H6PD	ENSG00000049239	9563	hexose-6-phosphate dehydrogenase/glucose 1-dehydrogenase [Source:HGNC Symbol;Acc:HGNC:4795]	protein_coding	364.338	-0.478263	0.157371	-0.364002	0.177293	-3.03908	0.00237303	0.0647047	419.091	481.782	373.659	426.968	304.455	268.981	332.249	307.52
SH3YL1	ENSG00000035115	26751	SH3 and SYLF domain containing 1 [Source:HGNC Symbol;Acc:HGNC:29546]	protein_coding	130.914	-1.46758	0.483382	-0.0947847	0.178696	-3.03607	0.00239685	0.0650528	230.205	206.997	124.166	209.019	137.539	38.4258	36.4898	64.4742
C11orf24	ENSG00000171067	53838	chromosome 11 open reading frame 24 [Source:HGNC Symbol;Acc:HGNC:1174]	protein_coding	334.785	0.751899	0.247872	0.544922	0.301268	3.03342	0.00241799	0.0654982	200.691	294.153	255.295	251.229	365.88	310.362	576.154	424.515
MRPL21	ENSG00000197345	219927	mitochondrial ribosomal protein L21 [Source:HGNC Symbol;Acc:HGNC:14479]	protein_coding	985.926	0.452055	0.14909	0.346127	0.166853	3.03209	0.00242865	0.0656587	735.475	723.883	967.8	896.551	1231.17	1256.23	1012.11	1064.19
ZKSCAN2	ENSG00000155592	342357	zinc finger with KRAB and SCAN domains 2 [Source:HGNC Symbol;Acc:HGNC:25677]	protein_coding	339.908	-0.495441	0.163592	-0.374	0.186115	-3.02852	0.00245754	0.0663106	452.146	376.467	357.413	401.804	245.701	313.318	288.077	284.338
GALM	ENSG00000143891	130589	galactose mutarotase [Source:HGNC Symbol;Acc:HGNC:24063]	protein_coding	230.686	-1.55551	0.513767	-0.083	0.161035	-3.02765	0.00246465	0.0663732	506.45	71.4199	417.755	380.7	154.898	118.233	90.2642	105.767
GNA11	ENSG00000088256	2767	G protein subunit alpha 11 [Source:HGNC Symbol;Acc:HGNC:4379]	protein_coding	785.413	-0.570719	0.188804	-0.422356	0.220403	-3.02281	0.00250439	0.0673126	858.251	1170.56	750.799	972.448	500.748	712.355	690.425	627.718
MAX	ENSG00000125952	4149	MYC associated factor X [Source:HGNC Symbol;Acc:HGNC:6913]	protein_coding	786.902	-0.638562	0.211378	-0.465984	0.251929	-3.02095	0.0025198	0.0675959	913.736	1254.08	660.285	1000.86	536.802	718.267	605.922	605.26
SLIRP	ENSG00000119705	81892	SRA stem-loop interacting RNA binding protein [Source:HGNC Symbol;Acc:HGNC:20495]	protein_coding	1219.69	0.713437	0.236392	0.516221	0.286783	3.01803	0.00254423	0.0681195	696.517	679.094	1407.6	914.815	1532.96	1330.12	1666.05	1530.36
NANOS1	ENSG00000188613	340719	nanos C2HC-type zinc finger 1 [Source:HGNC Symbol;Acc:HGNC:23044]	protein_coding	22.5283	-4.15022	1.37628	-0.0195882	0.114828	-3.01553	0.00256534	0.0684206	44.8604	1.21051	34.8129	89.2899	1.33533	2.95583	5.76154	0
TRIM2	ENSG00000109654	23321	tripartite motif containing 2 [Source:HGNC Symbol;Acc:HGNC:15974]	protein_coding	168.211	-1.72023	0.570387	-1.16172	0.797567	-3.0159	0.00256217	0.0684206	436.799	223.944	78.9093	292.221	29.3772	91.6308	125.794	67.0097
SEC61G	ENSG00000132432	23480	SEC61 translocon subunit gamma [Source:HGNC Symbol;Acc:HGNC:18277]	protein_coding	1268.25	0.50808	0.168665	0.381384	0.192925	3.01235	0.0025923	0.0690068	1110.89	752.935	1274.15	1052.81	1579.69	1350.81	1545.05	1479.65
HDX	ENSG00000165259	139324	highly divergent homeobox [Source:HGNC Symbol;Acc:HGNC:26411]	protein_coding	118.45	-1.20197	0.399541	-0.82662	0.529948	-3.00838	0.00262643	0.0696481	116.873	260.259	112.562	170.462	46.7365	79.8074	90.2642	70.6318
TMEM69	ENSG00000159596	51249	transmembrane protein 69 [Source:HGNC Symbol;Acc:HGNC:28035]	protein_coding	365.88	0.853161	0.283541	0.603965	0.356062	3.00896	0.00262146	0.0696481	249.093	160.997	371.338	260.158	536.802	523.182	352.414	473.052
NUAK1	ENSG00000074590	9891	NUAK family kinase 1 [Source:HGNC Symbol;Acc:HGNC:14311]	protein_coding	216.41	-0.586453	0.195056	-0.431338	0.228585	-3.00659	0.00264194	0.0697924	283.329	275.995	223.963	260.564	176.263	141.88	193.972	175.312
ZNRF1	ENSG00000186187	84937	zinc and ring finger 1 [Source:HGNC Symbol;Acc:HGNC:18452]	protein_coding	111.934	-1.38201	0.459585	-0.10397	0.19509	-3.00709	0.00263762	0.0697924	112.151	90.788	273.862	172.086	45.4012	47.2933	91.2244	62.6631
LMOD1	ENSG00000163431	25802	leiomodin 1 [Source:HGNC Symbol;Acc:HGNC:6647]	protein_coding	104.779	0.877274	0.291909	0.617741	0.369438	3.0053	0.0026532	0.0699567	57.8463	85.946	73.1072	75.8964	130.862	177.35	107.549	129.673
TULP2	ENSG00000104804	7288	TUB like protein 2 [Source:HGNC Symbol;Acc:HGNC:12424]	protein_coding	22.1526	-4.78051	1.59273	-0.0156339	0.113941	-3.00145	0.002687	0.0707135	7.08322	82.3144	1.16043	80.3609	5.34132	0	0.960257	0
ZMYND10	ENSG00000004838	51364	zinc finger MYND-type containing 10 [Source:HGNC Symbol;Acc:HGNC:19412]	protein_coding	33.9635	-2.99501	0.998165	-0.0306653	0.118372	-3.00051	0.00269525	0.0707961	131.04	26.6311	9.28345	72.6495	12.018	14.7792	0.960257	4.34657
BEST1	ENSG00000167995	7439	bestrophin 1 [Source:HGNC Symbol;Acc:HGNC:12703]	protein_coding	12.1867	-2.44186	0.815123	-0.0452083	0.125531	-2.9957	0.0027382	0.0717038	25.9718	19.3681	13.9252	22.3225	1.33533	5.91166	5.76154	2.89772
PLAC8L1	ENSG00000173261	153770	PLAC8 like 1 [Source:HGNC Symbol;Acc:HGNC:31746]	protein_coding	6.63457	-5.17616	1.72799	-0.0153617	0.113867	-2.99548	0.00274014	0.0717038	14.1664	19.3681	1.16043	17.0462	1.33533	0	0	0
INSRR	ENSG00000027644	3645	insulin receptor related receptor [Source:HGNC Symbol;Acc:HGNC:6093]	protein_coding	8.64158	-5.80188	1.93819	-0.0121794	0.113328	-2.99346	0.00275833	0.0720438	28.3329	25.4206	0	15.0169	0	0	0	0.362214
SEMA3A	ENSG00000075213	10371	semaphorin 3A [Source:HGNC Symbol;Acc:HGNC:10723]	protein_coding	77.496	2.03004	0.678624	1.34551	0.996588	2.99141	0.00277695	0.0723937	3.54161	55.6833	38.2942	24.3518	86.7964	189.173	87.3834	134.744
BEND7	ENSG00000165626	222389	BEN domain containing 7 [Source:HGNC Symbol;Acc:HGNC:23514]	protein_coding	287.363	-0.500812	0.167539	-0.373535	0.19163	-2.98922	0.00279688	0.0727766	361.244	323.205	327.242	337.678	204.305	230.555	272.713	241.959
MMP24OS	ENSG00000126005	101410538	MMP24 opposite strand [Source:HGNC Symbol;Acc:HGNC:44421]	protein_coding	268.659	-0.795377	0.266267	-0.561111	0.332315	-2.98715	0.00281593	0.0731352	325.828	321.995	367.857	350.26	289.766	147.792	146.919	198.856
MT-ND3	ENSG00000198840	4537	mitochondrially encoded NADH:ubiquinone oxidoreductase core subunit 3 [Source:HGNC Symbol;Acc:HGNC:7458]	protein_coding	23160.7	0.342044	0.114551	0.27054	0.122645	2.98597	0.00282683	0.0731443	17374	18672.1	25075.8	20592.7	25873.3	24663.5	27284.7	25749.8
NSRP1	ENSG00000126653	84081	nuclear speckle splicing regulatory protein 1 [Source:HGNC Symbol;Acc:HGNC:25305]	protein_coding	691.737	0.885124	0.296398	0.618777	0.378126	2.98627	0.00282406	0.0731443	406.105	513.255	557.007	465.931	423.299	1191.2	1044.76	932.34
PRRT2	ENSG00000167371	112476	proline rich transmembrane protein 2 [Source:HGNC Symbol;Acc:HGNC:30500]	protein_coding	19.2515	-4.79564	1.60682	-0.0154659	0.1139	-2.98455	0.00283998	0.0732113	72.0128	0	10.4439	65.3439	1.33533	2.95583	1.92051	0
RAB7A	ENSG00000075785	7879	RAB7A, member RAS oncogene family [Source:HGNC Symbol;Acc:HGNC:9788]	protein_coding	1601.22	-0.464708	0.155689	-0.342361	0.176454	-2.98484	0.00283726	0.0732113	1498.1	1820.6	2116.63	1981.02	1167.08	1655.27	1279.06	1292.02
SYCE3	ENSG00000217442	644186	synaptonemal complex central element protein 3 [Source:HGNC Symbol;Acc:HGNC:35245]	protein_coding	4.65487	5.82324	1.95244	0.0126362	0.113397	2.98255	0.00285857	0.0735539	0	0	0	0	2.67066	5.91166	13.4436	15.213
TMEM121B	ENSG00000183307	27439	transmembrane protein 121B [Source:HGNC Symbol;Acc:HGNC:1844]	protein_coding	25.2243	-4.23107	1.41961	-0.0180439	0.114444	-2.98045	0.00287826	0.0739234	1.18054	82.3144	19.7273	86.4488	1.33533	8.86749	1.92051	0
ALG1	ENSG00000033011	56052	ALG1 chitobiosyldiphosphodolichol beta-mannosyltransferase [Source:HGNC Symbol;Acc:HGNC:18294]	protein_coding	381.86	0.502945	0.16881	0.374473	0.193577	2.97936	0.00288854	0.0740503	292.773	272.364	343.488	352.695	508.76	425.64	454.202	404.956
PUS10	ENSG00000162927	150962	pseudouridine synthase 10 [Source:HGNC Symbol;Acc:HGNC:26505]	protein_coding	101.813	-1.07404	0.360836	-0.734818	0.475934	-2.97652	0.0029154	0.074601	147.567	77.4724	189.15	139.617	68.1018	53.205	72.0193	67.3719
SMAD6	ENSG00000137834	4091	SMAD family member 6 [Source:HGNC Symbol;Acc:HGNC:6772]	protein_coding	244.946	-0.942967	0.316973	-0.659505	0.407156	-2.97491	0.00293075	0.0748556	295.134	194.892	468.814	332.402	210.982	127.101	160.363	169.879
ZNF350	ENSG00000256683	59348	zinc finger protein 350 [Source:HGNC Symbol;Acc:HGNC:16656]	protein_coding	63.0147	-1.71087	0.575246	-0.0683518	0.143831	-2.97416	0.00293796	0.0749017	67.2906	59.3148	157.819	100.654	48.0718	32.5141	10.5628	27.8905
OTUD4	ENSG00000164164	54726	OTU deubiquitinase 4 [Source:HGNC Symbol;Acc:HGNC:24949]	protein_coding	592.483	0.51032	0.171657	0.378006	0.197843	2.9729	0.00295	0.0749736	584.366	440.624	440.964	487.847	556.832	759.649	767.245	702.334
STAT3	ENSG00000168610	6774	signal transducer and activator of transcription 3 [Source:HGNC Symbol;Acc:HGNC:11364]	protein_coding	923.946	-0.41256	0.138781	-0.318263	0.153728	-2.97274	0.00295159	0.0749736	1107.34	1158.45	869.163	1080.41	843.928	851.279	694.266	786.73
FRS2	ENSG00000166225	10818	fibroblast growth factor receptor substrate 2 [Source:HGNC Symbol;Acc:HGNC:16971]	protein_coding	439.286	0.515462	0.173493	0.381301	0.200168	2.97108	0.00296754	0.0750286	305.759	320.784	449.087	371.771	540.808	478.845	541.585	505.651
ZC3H11B	ENSG00000215817	643136	zinc finger CCCH-type containing 11B [Source:HGNC Symbol;Acc:HGNC:25659]	protein_coding	74.6431	2.03181	0.683837	1.33381	1.0185	2.97118	0.00296655	0.0750286	21.2497	14.5261	58.0216	24.3518	49.4072	50.2491	249.667	129.673
ZNF35	ENSG00000169981	7584	zinc finger protein 35 [Source:HGNC Symbol;Acc:HGNC:13099]	protein_coding	149.44	-0.625806	0.21065	-0.450162	0.252596	-2.97083	0.00296998	0.0750286	206.594	185.207	155.498	178.58	114.838	118.233	115.231	121.342
FAM149A	ENSG00000109794	25854	family with sequence similarity 149 member A [Source:HGNC Symbol;Acc:HGNC:24527]	protein_coding	52.843	-3.44128	1.15893	-0.0235542	0.115898	-2.96936	0.00298425	0.0751317	140.484	26.6311	102.118	114.048	2.67066	35.47	0.960257	0.362214
LRRC37B	ENSG00000185158	114659	leucine rich repeat containing 37B [Source:HGNC Symbol;Acc:HGNC:29070]	protein_coding	158.787	-0.973383	0.327878	-0.659431	0.435522	-2.96873	0.00299031	0.0751317	182.983	188.839	251.814	211.86	84.1257	171.438	72.0193	107.215
NABP2	ENSG00000139579	79035	nucleic acid binding protein 2 [Source:HGNC Symbol;Acc:HGNC:28412]	protein_coding	814.574	0.513658	0.172998	0.379971	0.19947	2.96916	0.0029862	0.0751317	585.546	756.566	676.531	671.703	886.658	765.56	1208	966.026
NCBP2	ENSG00000114503	22916	nuclear cap binding protein subunit 2 [Source:HGNC Symbol;Acc:HGNC:7659]	protein_coding	896.611	0.54157	0.182573	0.397096	0.213129	2.96633	0.00301379	0.0755845	512.353	809.829	877.286	720.813	1120.34	1099.57	952.575	1080.12
FRMPD3	ENSG00000147234	84443	FERM and PDZ domain containing 3 [Source:HGNC Symbol;Acc:HGNC:29382]	protein_coding	24.4655	-4.26625	1.44127	-0.0178738	0.114414	-2.96006	0.00307575	0.0769992	2.36107	113.788	5.80216	63.7205	1.33533	2.95583	5.76154	0
DCAF8	ENSG00000132716	50717	DDB1 and CUL4 associated factor 8 [Source:HGNC Symbol;Acc:HGNC:24891]	protein_coding	488.335	-0.632943	0.21403	-0.4522	0.258279	-2.95726	0.00310387	0.0772847	744.919	466.045	553.526	612.041	304.455	372.435	471.486	381.774
PLAGL2	ENSG00000126003	5326	PLAG1 like zinc finger 2 [Source:HGNC Symbol;Acc:HGNC:9047]	protein_coding	688.704	-0.380925	0.128793	-0.29315	0.140928	-2.95766	0.00309986	0.0772847	879.5	712.988	726.43	791.839	546.149	662.106	591.518	599.103
PLGLB1	ENSG00000183281	5343	plasminogen like B1 [Source:HGNC Symbol;Acc:HGNC:9072]	protein_coding	13.4018	4.19287	1.41747	0.019365	0.114763	2.95801	0.00309636	0.0772847	1.18054	3.63152	1.16043	0	8.01197	38.4258	1.92051	52.8833
COX7B	ENSG00000131174	1349	cytochrome c oxidase subunit 7B [Source:HGNC Symbol;Acc:HGNC:2291]	protein_coding	2996.71	0.3654	0.123849	0.283188	0.134512	2.95036	0.00317408	0.0788911	2077.75	2583.22	2988.11	2821.97	3347.67	3511.53	3483.81	3159.6
GDF15	ENSG00000130513	9518	growth differentiation factor 15 [Source:HGNC Symbol;Acc:HGNC:30142]	protein_coding	75.0295	-0.972454	0.330516	-0.654688	0.440871	-2.94223	0.0032586	0.0808472	101.526	114.998	77.7489	101.466	36.0539	65.0283	50.8936	52.5211
GPRC5C	ENSG00000170412	55890	G protein-coupled receptor class C group 5 member C [Source:HGNC Symbol;Acc:HGNC:13309]	protein_coding	112.04	-1.77909	0.605021	-0.0617216	0.137607	-2.94054	0.00327643	0.0809997	295.134	39.9467	167.102	190.756	78.7844	56.1608	24.9667	43.4657
SEC11C	ENSG00000166562	90701	SEC11 homolog C, signal peptidase complex subunit [Source:HGNC Symbol;Acc:HGNC:23400]	protein_coding	635.969	0.416982	0.14179	0.31545	0.157848	2.94083	0.00327331	0.0809997	481.659	493.887	632.435	566.991	782.503	753.737	676.021	700.523
CENPN	ENSG00000166451	55839	centromere protein N [Source:HGNC Symbol;Acc:HGNC:30873]	protein_coding	658.956	0.351706	0.119672	0.274987	0.129241	2.93891	0.00329366	0.0812627	607.977	535.044	545.403	619.753	778.497	786.251	702.908	695.814
USP42	ENSG00000106346	84132	ubiquitin specific peptidase 42 [Source:HGNC Symbol;Acc:HGNC:20068]	protein_coding	316.263	-0.749397	0.255033	-0.51814	0.322385	-2.93843	0.00329879	0.0812627	401.383	509.623	258.776	413.169	243.03	277.848	193.012	233.266
SYNC	ENSG00000162520	81493	syncoilin, intermediate filament protein [Source:HGNC Symbol;Acc:HGNC:28897]	protein_coding	54.0461	-0.998721	0.340107	-0.672772	0.452554	-2.93649	0.00331951	0.0816281	60.2074	85.946	71.9467	71.026	38.7245	32.5141	33.609	38.3947
IGDCC4	ENSG00000103742	57722	immunoglobulin superfamily DCC subclass member 4 [Source:HGNC Symbol;Acc:HGNC:13770]	protein_coding	184.835	-1.068	0.363768	-0.71509	0.49338	-2.93593	0.00332549	0.0816306	178.261	272.364	291.268	260.97	197.629	79.8074	80.6616	117.72
CYP2J2	ENSG00000134716	1573	cytochrome P450 family 2 subfamily J member 2 [Source:HGNC Symbol;Acc:HGNC:2634]	protein_coding	54.7951	-2.12464	0.724519	-0.0482033	0.12742	-2.93248	0.00336269	0.0822135	27.1524	104.104	127.647	98.6247	46.7365	5.91166	11.5231	16.6619
ERGIC2	ENSG00000087502	51290	ERGIC and golgi 2 [Source:HGNC Symbol;Acc:HGNC:30208]	protein_coding	922.074	0.516351	0.176104	0.376708	0.205067	2.93208	0.00336703	0.0822135	754.363	714.199	804.179	756.123	1156.39	1330.12	774.927	1086.28
KRBA1	ENSG00000133619	84626	KRAB-A domain containing 1 [Source:HGNC Symbol;Acc:HGNC:22228]	protein_coding	173.215	-0.820501	0.279803	-0.565466	0.359667	-2.93242	0.00336327	0.0822135	236.107	257.838	160.139	229.313	86.7964	144.836	144.999	125.688
CYB5D2	ENSG00000167740	124936	cytochrome b5 domain containing 2 [Source:HGNC Symbol;Acc:HGNC:28471]	protein_coding	708.512	0.563866	0.192565	0.406345	0.228298	2.92818	0.00340949	0.0826683	511.173	434.572	767.045	574.296	917.371	818.765	811.417	833.456
MTA3	ENSG00000057935	57504	metastasis associated 1 family member 3 [Source:HGNC Symbol;Acc:HGNC:23784]	protein_coding	511.834	-0.420461	0.143579	-0.316352	0.160089	-2.92842	0.00340689	0.0826683	528.881	572.57	659.125	586.878	396.593	413.816	491.652	445.162
PDHA1	ENSG00000131828	5160	pyruvate dehydrogenase E1 subunit alpha 1 [Source:HGNC Symbol;Acc:HGNC:8806]	protein_coding	1727.56	-0.363951	0.124288	-0.27985	0.135178	-2.92829	0.00340832	0.0826683	1605.53	2164.39	2022.63	1976.55	1482.21	1684.82	1373.17	1511.16
RIMS3	ENSG00000117016	9783	regulating synaptic membrane exocytosis 3 [Source:HGNC Symbol;Acc:HGNC:21292]	protein_coding	315.716	-0.75131	0.256569	-0.515958	0.326966	-2.9283	0.00340824	0.0826683	382.494	440.624	345.808	407.486	206.976	345.832	163.244	233.266
ADCY1	ENSG00000164742	107	adenylate cyclase 1 [Source:HGNC Symbol;Acc:HGNC:232]	protein_coding	595.528	-0.567908	0.194066	-0.40642	0.231167	-2.92637	0.00342942	0.0827176	793.321	767.461	541.921	736.641	379.233	585.255	485.89	474.501
DFFB	ENSG00000169598	1677	DNA fragmentation factor subunit beta [Source:HGNC Symbol;Acc:HGNC:2773]	protein_coding	130.167	-0.799305	0.273088	-0.548906	0.348549	-2.92691	0.00342347	0.0827176	180.622	176.734	139.252	167.621	76.1137	79.8074	124.833	96.3491
MED27	ENSG00000160563	9442	mediator complex subunit 27 [Source:HGNC Symbol;Acc:HGNC:2377]	protein_coding	222.148	-1.72857	0.590508	-0.0634399	0.139119	-2.92726	0.00341962	0.0827176	463.951	427.309	75.428	398.963	40.0599	97.5424	189.171	84.7582
IDI1	ENSG00000067064	3422	isopentenyl-diphosphate delta isomerase 1 [Source:HGNC Symbol;Acc:HGNC:5387]	protein_coding	1735.7	0.451168	0.154366	0.335307	0.17488	2.92272	0.00346992	0.0833823	1264.36	1225.03	1894.98	1478.56	2013.68	2142.98	1876.34	1989.64
SHLD1	ENSG00000171984	149840	shieldin complex subunit 1 [Source:HGNC Symbol;Acc:HGNC:26318]	protein_coding	42.0267	1.16996	0.40036	0.771848	0.555692	2.92226	0.00347502	0.0833823	24.7913	33.8942	17.4065	27.1928	64.0958	56.1608	57.6154	55.0566
TOMM5	ENSG00000175768	401505	translocase of outer mitochondrial membrane 5 [Source:HGNC Symbol;Acc:HGNC:31369]	protein_coding	264.658	0.66725	0.228263	0.468914	0.281196	2.92317	0.00346493	0.0833823	219.58	136.787	250.653	209.831	335.168	336.965	314.964	313.316
C1D	ENSG00000197223	10438	C1D nuclear receptor corepressor [Source:HGNC Symbol;Acc:HGNC:29911]	protein_coding	362.97	0.711115	0.243447	0.495486	0.304146	2.92102	0.00348885	0.0835696	187.705	262.68	374.819	277.61	439.323	387.214	525.261	449.146
SYT16	ENSG00000139973	83851	synaptotagmin 16 [Source:HGNC Symbol;Acc:HGNC:23142]	protein_coding	22.2688	-3.94425	1.35085	-0.0197024	0.114841	-2.91983	0.00350222	0.0837454	1.18054	54.4728	38.2942	72.6495	6.67664	2.95583	1.92051	0
CHST15	ENSG00000182022	51363	carbohydrate sulfotransferase 15 [Source:HGNC Symbol;Acc:HGNC:18137]	protein_coding	182.508	-0.72412	0.248098	-0.499764	0.312528	-2.91868	0.00351517	0.0837662	168.817	215.47	299.391	225.66	130.862	141.88	136.356	141.626
CLEC4F	ENSG00000152672	165530	C-type lectin domain family 4 member F [Source:HGNC Symbol;Acc:HGNC:25357]	protein_coding	28.9876	-2.72321	0.933002	-0.0342836	0.119881	-2.91876	0.0035143	0.0837662	74.3738	54.4728	24.3691	49.5153	0	2.95583	18.2449	7.96872
GSTP1	ENSG00000084207	2950	glutathione S-transferase pi 1 [Source:HGNC Symbol;Acc:HGNC:4638]	protein_coding	4146.5	0.325567	0.111593	0.255474	0.119092	2.91746	0.00352898	0.083951	3013.91	3661.78	4053.39	3990.04	4769.79	4495.82	4889.63	4297.67
SAP30	ENSG00000164105	8819	Sin3A associated protein 30 [Source:HGNC Symbol;Acc:HGNC:10532]	protein_coding	146.855	-1.66608	0.571675	-0.0660958	0.14149	-2.91439	0.0035639	0.0846364	240.83	77.4724	324.921	246.359	77.4491	124.145	22.0859	61.5765
CRYBG1	ENSG00000112297	202	crystallin beta-gamma domain containing 1 [Source:HGNC Symbol;Acc:HGNC:356]	protein_coding	15.1959	-4.97558	1.70813	-0.0142652	0.113674	-2.91288	0.00358108	0.0847966	40.1383	21.7891	0	56.0091	2.67066	0	0.960257	0
TAC1	ENSG00000006128	6863	tachykinin precursor 1 [Source:HGNC Symbol;Acc:HGNC:11517]	protein_coding	6.10959	5.34875	1.83634	0.0138486	0.113587	2.91273	0.00358287	0.0847966	0	0	1.16043	0	1.33533	26.6025	3.84103	15.9374
AIFM1	ENSG00000156709	9131	apoptosis inducing factor mitochondria associated 1 [Source:HGNC Symbol;Acc:HGNC:8768]	protein_coding	1346.61	-0.43124	0.148151	-0.32142	0.166354	-2.91082	0.00360484	0.0848918	1729.49	1496.19	1377.43	1591.39	1351.35	892.661	1189.76	1144.6
DCBLD2	ENSG00000057019	131566	discoidin, CUB and LCCL domain containing 2 [Source:HGNC Symbol;Acc:HGNC:24627]	protein_coding	488.984	-0.822365	0.282469	-0.560546	0.366674	-2.91135	0.00359875	0.0848918	605.616	859.46	371.338	663.18	275.078	342.876	454.202	340.119
SAT1	ENSG00000130066	6303	spermidine/spermine N1-acetyltransferase 1 [Source:HGNC Symbol;Acc:HGNC:10540]	protein_coding	938.413	0.479964	0.164892	0.352209	0.189482	2.91078	0.00360526	0.0848918	746.1	899.406	707.863	781.286	1340.67	1064.1	867.112	1100.77
PDGFC	ENSG00000145431	56034	platelet derived growth factor C [Source:HGNC Symbol;Acc:HGNC:8801]	protein_coding	98.8448	1.1535	0.396569	0.750122	0.564685	2.90871	0.00362919	0.0853106	35.4161	85.946	61.5028	60.8795	93.473	198.041	120.032	135.468
CHD4	ENSG00000111642	1108	chromodomain helicase DNA binding protein 4 [Source:HGNC Symbol;Acc:HGNC:1919]	protein_coding	334.255	-0.461932	0.158863	-0.339865	0.181245	-2.90773	0.00364061	0.0854342	397.841	428.519	328.402	392.875	259.054	298.539	285.196	283.614
HSPE1	ENSG00000115541	3336	heat shock protein family E (Hsp10) member 1 [Source:HGNC Symbol;Acc:HGNC:5269]	protein_coding	1472.58	0.451365	0.155364	0.33369	0.176423	2.90521	0.00367004	0.0859793	1096.72	1031.35	1588.63	1256.55	1770.65	1808.97	1543.13	1684.66
SUMO2	ENSG00000188612	6613	small ubiquitin like modifier 2 [Source:HGNC Symbol;Acc:HGNC:11125]	protein_coding	5731.36	0.291482	0.100359	0.234556	0.105452	2.90439	0.00367966	0.0860593	5085.75	4332.4	5929.8	5266.48	6380.2	6369.82	6273.36	6213.07
ALG2	ENSG00000119523	85365	ALG2 alpha-1,3/1,6-mannosyltransferase [Source:HGNC Symbol;Acc:HGNC:23159]	protein_coding	325.358	-0.662274	0.228106	-0.460773	0.281744	-2.90336	0.00369184	0.0861988	419.091	439.414	330.723	411.951	308.461	165.527	275.594	252.101
INPP5B	ENSG00000204084	3633	inositol polyphosphate-5-phosphatase B [Source:HGNC Symbol;Acc:HGNC:6077]	protein_coding	267.887	-1.00077	0.344777	-0.656529	0.47572	-2.90266	0.0037001	0.0862466	311.662	527.781	207.717	382.729	253.712	144.836	141.158	173.501
NECTIN4	ENSG00000143217	81607	nectin cell adhesion molecule 4 [Source:HGNC Symbol;Acc:HGNC:19688]	protein_coding	58.5857	2.22944	0.768299	1.33944	1.41999	2.90178	0.00371047	0.0863432	3.54161	8.47354	54.5403	15.8287	57.4191	135.968	86.4231	106.491
MRTFA	ENSG00000196588	57591	myocardin related transcription factor A [Source:HGNC Symbol;Acc:HGNC:14334]	protein_coding	353.764	-0.744586	0.25698	-0.507057	0.328169	-2.89745	0.0037621	0.0873458	406.105	478.15	435.162	457.408	190.952	209.864	389.864	262.606
RPL13A	ENSG00000142541	23521	ribosomal protein L13a [Source:HGNC Symbol;Acc:HGNC:10304]	protein_coding	27913.8	0.359894	0.124225	0.282669	0.13505	2.89711	0.00376615	0.0873458	20716.1	21560.3	27690.2	27823.5	34788	32842.2	30108.9	27781.5
DDX19B	ENSG00000157349	11269	DEAD-box helicase 19B [Source:HGNC Symbol;Acc:HGNC:2742]	protein_coding	423.095	-0.570531	0.197007	-0.402982	0.236735	-2.896	0.00377953	0.0875098	404.924	489.045	616.189	507.329	336.503	404.949	281.355	344.466
SELENOW	ENSG00000178980	6415	selenoprotein W [Source:HGNC Symbol;Acc:HGNC:10752]	protein_coding	652.724	0.46379	0.160272	0.340038	0.18346	2.89378	0.00380639	0.0879848	448.604	535.044	648.681	557.25	745.113	869.014	674.1	743.989
FRAT2	ENSG00000181274	23401	FRAT regulator of WNT signaling pathway 2 [Source:HGNC Symbol;Acc:HGNC:16048]	protein_coding	346.168	0.760286	0.26294	0.514428	0.34008	2.89148	0.0038343	0.0884065	201.872	311.1	257.616	254.07	295.108	605.945	404.268	439.366
NBDY	ENSG00000204272	550643	negative regulator of P-body association [Source:HGNC Symbol;Acc:HGNC:50713]	protein_coding	578.571	0.355933	0.12313	0.272973	0.133681	2.89071	0.00384376	0.0884065	558.394	486.624	459.531	520.316	623.599	706.444	637.611	636.049
NOP10	ENSG00000182117	55505	NOP10 ribonucleoprotein [Source:HGNC Symbol;Acc:HGNC:14378]	protein_coding	1411.08	0.668974	0.231422	0.460634	0.289294	2.89071	0.0038437	0.0884065	748.461	899.406	1642.01	1067.83	1849.43	1826.7	1505.68	1749.13
CYB561D1	ENSG00000174151	284613	cytochrome b561 family member D1 [Source:HGNC Symbol;Acc:HGNC:26804]	protein_coding	129.146	-0.915861	0.317085	-0.601318	0.431899	-2.88838	0.00387235	0.0889167	115.693	177.944	213.519	167.621	113.503	88.6749	65.2975	90.9158
NDUFS6	ENSG00000145494	4726	NADH:ubiquinone oxidoreductase subunit S6 [Source:HGNC Symbol;Acc:HGNC:7713]	protein_coding	685.674	0.346529	0.120121	0.266916	0.129678	2.88484	0.00391617	0.0897741	566.658	645.2	592.98	612.447	702.383	741.914	861.35	762.462
BCAS1	ENSG00000064787	8537	brain enriched myelin associated protein 1 [Source:HGNC Symbol;Acc:HGNC:974]	protein_coding	13.2195	-4.64137	1.60989	-0.0155348	0.113895	-2.88305	0.00393849	0.0899502	2.36107	1.21051	67.305	29.628	1.33533	2.95583	0.960257	0
CMTM6	ENSG00000091317	54918	CKLF like MARVEL transmembrane domain containing 6 [Source:HGNC Symbol;Acc:HGNC:19177]	protein_coding	782.476	-0.438257	0.152032	-0.322607	0.172183	-2.88266	0.00394331	0.0899502	1071.93	855.828	739.195	929.426	663.658	733.046	604.962	661.766
GHRL	ENSG00000157017	51738	ghrelin and obestatin prepropeptide [Source:HGNC Symbol;Acc:HGNC:18129]	protein_coding	6.55952	6.31435	2.19026	0.00954943	0.112959	2.88292	0.00394001	0.0899502	0	0	0	0	14.6886	0	21.1257	16.6619
AMFR	ENSG00000159461	267	autocrine motility factor receptor [Source:HGNC Symbol;Acc:HGNC:463]	protein_coding	1171.41	-0.872414	0.30271	-0.58261	0.404244	-2.88201	0.00395142	0.0899872	1861.71	1367.87	1201.05	1636.44	1140.37	372.435	1005.39	786.005
ZNF816	ENSG00000180257	125893	zinc finger protein 816 [Source:HGNC Symbol;Acc:HGNC:26995]	protein_coding	22.9514	4.27232	1.48281	0.016588	0.114126	2.88124	0.00396109	0.0900597	1.18054	3.63152	4.64172	0	1.33533	2.95583	104.668	65.1986
BUB3	ENSG00000154473	9184	BUB3 mitotic checkpoint protein [Source:HGNC Symbol;Acc:HGNC:1151]	protein_coding	2205.56	-0.189934	0.0659428	-0.162934	0.0660609	-2.88028	0.0039732	0.090187	2444.89	2330.22	2247.76	2385.26	2112.49	1980.41	2079.92	2063.54
KLF4	ENSG00000136826	9314	Kruppel like factor 4 [Source:HGNC Symbol;Acc:HGNC:6348]	protein_coding	34.7675	-1.95063	0.678186	-0.0535598	0.131026	-2.87624	0.00402442	0.0912005	47.2215	68.9989	45.2568	61.6912	8.01197	2.95583	31.6885	12.3153
ARID5A	ENSG00000196843	10865	AT-rich interaction domain 5A [Source:HGNC Symbol;Acc:HGNC:17361]	protein_coding	104.527	-1.09371	0.38042	-0.703145	0.541702	-2.87501	0.00404012	0.0914057	169.997	104.104	149.696	149.763	64.0958	32.5141	97.9462	68.0963
ZNF425	ENSG00000204947	155054	zinc finger protein 425 [Source:HGNC Symbol;Acc:HGNC:20690]	protein_coding	56.7095	-4.61362	1.60501	-0.0138336	0.113597	-2.8745	0.00404666	0.0914057	293.954	1.21051	1.16043	139.617	1.33533	2.95583	13.4436	0
GAB3	ENSG00000160219	139716	GRB2 associated binding protein 3 [Source:HGNC Symbol;Acc:HGNC:17515]	protein_coding	9.92836	6.05024	2.10653	0.0100554	0.113016	2.87214	0.00407702	0.0914954	0	1.21051	0	0	10.6826	50.2491	17.2846	0
GEMIN5	ENSG00000082516	25929	gem nuclear organelle associated protein 5 [Source:HGNC Symbol;Acc:HGNC:20043]	protein_coding	858.651	-0.611049	0.212732	-0.432238	0.25975	-2.87239	0.00407383	0.0914954	1029.43	1260.14	774.008	1088.93	510.096	670.974	868.072	667.561
NAGPA	ENSG00000103174	51172	N-acetylglucosamine-1-phosphodiester alpha-N-acetylglucosaminidase [Source:HGNC Symbol;Acc:HGNC:17378]	protein_coding	117.873	0.785477	0.2734	0.526563	0.356604	2.873	0.00406593	0.0914954	87.3598	85.946	85.8719	88.884	132.198	118.233	200.694	143.799
TMEM121	ENSG00000184986	80757	transmembrane protein 121 [Source:HGNC Symbol;Acc:HGNC:20511]	protein_coding	158.912	0.916161	0.318914	0.597573	0.438997	2.87275	0.00406914	0.0914954	103.887	81.1039	146.214	107.96	132.198	257.157	241.024	201.753
ANKRD1	ENSG00000148677	27063	ankyrin repeat domain 1 [Source:HGNC Symbol;Acc:HGNC:15819]	protein_coding	15.1852	-4.42705	1.54209	-0.0167683	0.114164	-2.87081	0.00409421	0.0915848	40.1383	13.3156	1.16043	61.6912	1.33533	0	3.84103	0
WNT7B	ENSG00000188064	7477	Wnt family member 7B [Source:HGNC Symbol;Acc:HGNC:12787]	protein_coding	12.339	4.05851	1.41347	0.0191971	0.114709	2.8713	0.00408781	0.0915848	1.18054	3.63152	1.16043	0	20.0299	38.4258	0.960257	33.3237
NDUFA12	ENSG00000184752	55967	NADH:ubiquinone oxidoreductase subunit A12 [Source:HGNC Symbol;Acc:HGNC:23987]	protein_coding	928.161	0.547447	0.19095	0.386676	0.228086	2.86697	0.00414425	0.0924194	674.087	589.517	996.81	756.529	1301.95	1028.63	987.144	1090.63
RNGTT	ENSG00000111880	8732	RNA guanylyltransferase and 5'-phosphatase [Source:HGNC Symbol;Acc:HGNC:10073]	protein_coding	306.675	-0.441248	0.15391	-0.323453	0.174287	-2.86692	0.00414484	0.0924194	339.995	360.731	365.536	353.101	261.724	218.731	288.077	265.503
RYR1	ENSG00000196218	6261	ryanodine receptor 1 [Source:HGNC Symbol;Acc:HGNC:10483]	protein_coding	7.70114	-3.91654	1.3664	-0.0213752	0.115219	-2.86633	0.0041526	0.0924437	4.72215	15.7366	12.7647	23.1342	1.33533	2.95583	0.960257	0
CD34	ENSG00000174059	947	CD34 molecule [Source:HGNC Symbol;Acc:HGNC:1662]	protein_coding	8.05452	-6.31285	2.20384	-0.00914299	0.112909	-2.86447	0.00417703	0.0926901	0	19.3681	24.3691	20.699	0	0	0	0
KIF17	ENSG00000117245	57576	kinesin family member 17 [Source:HGNC Symbol;Acc:HGNC:19167]	protein_coding	195.293	1.08037	0.377104	0.687317	0.548598	2.86491	0.00417122	0.0926901	63.749	177.944	140.412	120.947	196.293	209.864	379.301	273.834
TRIM24	ENSG00000122779	8805	tripartite motif containing 24 [Source:HGNC Symbol;Acc:HGNC:11812]	protein_coding	505.277	-0.504856	0.1763	-0.360768	0.206174	-2.86362	0.00418835	0.0927927	532.422	709.357	530.317	605.548	435.317	334.009	477.248	417.996
RASSF2	ENSG00000101265	9770	Ras association domain family member 2 [Source:HGNC Symbol;Acc:HGNC:9883]	protein_coding	105.5	-1.50775	0.526662	-0.0743652	0.149776	-2.86285	0.00419854	0.09287	37.7772	231.207	187.99	167.216	52.0778	56.1608	60.4962	51.0722
CEMIP2	ENSG00000135048	23670	cell migration inducing hyaluronidase 2 [Source:HGNC Symbol;Acc:HGNC:11869]	protein_coding	226.161	-0.514101	0.179667	-0.365809	0.211018	-2.86141	0.00421762	0.0931436	254.996	255.417	292.429	265.434	172.257	165.527	211.257	191.974
MOSPD1	ENSG00000101928	56180	motile sperm domain containing 1 [Source:HGNC Symbol;Acc:HGNC:25235]	protein_coding	275.611	0.621566	0.217457	0.428193	0.268608	2.85834	0.00425868	0.0936567	160.553	245.733	242.53	222.007	380.569	271.936	350.494	331.064
PNN	ENSG00000100941	5411	pinin, desmosome associated protein [Source:HGNC Symbol;Acc:HGNC:9162]	protein_coding	4561.41	0.184864	0.0646793	0.158601	0.0646787	2.85816	0.00426111	0.0936567	4340.84	4459.51	4164.79	4116.26	4823.21	4953.97	4560.26	5072.45
PRKAA1	ENSG00000132356	5562	protein kinase AMP-activated catalytic subunit alpha 1 [Source:HGNC Symbol;Acc:HGNC:9376]	protein_coding	394.315	-0.676487	0.236659	-0.458688	0.299121	-2.85848	0.00425671	0.0936567	602.074	401.888	439.803	502.864	323.15	203.952	378.341	302.449
GPATCH8	ENSG00000186566	23131	G-patch domain containing 8 [Source:HGNC Symbol;Acc:HGNC:29066]	protein_coding	1165.2	-0.492999	0.172543	-0.349617	0.201617	-2.85725	0.00427328	0.0937754	1776.71	1165.72	1085	1420.93	912.03	990.203	1016.91	954.073
NDUFB4	ENSG00000065518	4710	NADH:ubiquinone oxidoreductase subunit B4 [Source:HGNC Symbol;Acc:HGNC:7699]	protein_coding	1499.27	0.58738	0.205677	0.407596	0.251092	2.85584	0.00429232	0.0938962	1188.8	821.934	1600.23	1181.06	1439.48	1947.89	1984.85	1829.91
PADI2	ENSG00000117115	11240	peptidyl arginine deiminase 2 [Source:HGNC Symbol;Acc:HGNC:18341]	protein_coding	75.83	-2.31368	0.810129	-0.0396704	0.122416	-2.85594	0.00429099	0.0938962	178.261	91.9985	80.0697	155.446	74.7784	2.95583	8.64231	14.4886
RCC1L	ENSG00000274523	81554	RCC1 like [Source:HGNC Symbol;Acc:HGNC:14948]	protein_coding	582.274	0.470784	0.164945	0.339169	0.190704	2.85418	0.00431475	0.0942381	547.769	490.255	421.236	487.441	574.191	827.633	633.77	675.892
MAP6D1	ENSG00000180834	79929	MAP6 domain containing 1 [Source:HGNC Symbol;Acc:HGNC:25753]	protein_coding	12.888	-5.28438	1.85371	-0.0121749	0.113304	-2.8507	0.00436231	0.0951271	0	53.2623	6.96259	38.9629	0	2.95583	0.960257	0
C4orf48	ENSG00000243449	401115	chromosome 4 open reading frame 48 [Source:HGNC Symbol;Acc:HGNC:34437]	protein_coding	276.615	0.766254	0.269254	0.506198	0.355782	2.84584	0.00442939	0.0962549	149.928	167.05	273.862	228.907	404.605	277.848	401.387	309.331
OSBPL10	ENSG00000144645	114884	oxysterol binding protein like 10 [Source:HGNC Symbol;Acc:HGNC:16395]	protein_coding	76.807	-2.42042	0.850629	-0.0362448	0.120701	-2.84545	0.00443485	0.0962549	22.4302	285.679	59.182	147.328	22.7006	56.1608	5.76154	15.213
TRMT112	ENSG00000173113	51504	tRNA methyltransferase subunit 11-2 [Source:HGNC Symbol;Acc:HGNC:26940]	protein_coding	1700.31	0.421251	0.148019	0.309994	0.166759	2.84592	0.00442835	0.0962549	1346.99	1142.72	1818.4	1505.75	1962.93	1941.98	2000.22	1883.52
MT-CO3	ENSG00000198938	4514	mitochondrially encoded cytochrome c oxidase III [Source:HGNC Symbol;Acc:HGNC:7422]	protein_coding	114108	0.358529	0.126034	0.271664	0.137352	2.8447	0.00444526	0.0963302	83087.4	89201	127775	99942.6	125397	129312	129870	128278
CT45A10	ENSG00000269586	102723631	cancer/testis antigen family 45 member A10 [Source:HGNC Symbol;Acc:HGNC:51263]	protein_coding	329.77	0.592294	0.20836	0.40749	0.256193	2.84265	0.00447401	0.0966511	208.955	229.996	316.798	291.004	399.263	469.977	363.937	358.23
TEX261	ENSG00000144043	113419	testis expressed 261 [Source:HGNC Symbol;Acc:HGNC:30712]	protein_coding	967.931	-0.336109	0.118233	-0.257437	0.127448	-2.84276	0.00447244	0.0966511	1177	1039.82	991.008	1103.95	763.808	972.468	843.106	852.291
SLC25A48	ENSG00000145832	153328	solute carrier family 25 member 48 [Source:HGNC Symbol;Acc:HGNC:30451]	protein_coding	48.8319	1.53279	0.540199	0.890147	0.996212	2.83746	0.0045474	0.0980838	38.9577	25.4206	11.6043	23.9459	36.0539	100.498	83.5424	70.6318
CHMP5	ENSG00000086065	51510	charged multivesicular body protein 5 [Source:HGNC Symbol;Acc:HGNC:26942]	protein_coding	1180.64	0.46709	0.164674	0.335326	0.190223	2.83646	0.00456173	0.0982401	721.308	1111.24	1140.7	994.364	1443.49	1223.71	1440.39	1369.9
DLG5	ENSG00000151208	9231	discs large MAGUK scaffold protein 5 [Source:HGNC Symbol;Acc:HGNC:2904]	protein_coding	830.333	-0.383242	0.135317	-0.285188	0.149614	-2.83218	0.00462325	0.0994106	1064.84	964.774	763.564	964.331	742.443	738.958	689.464	714.287
EIF3J	ENSG00000104131	8669	eukaryotic translation initiation factor 3 subunit J [Source:HGNC Symbol;Acc:HGNC:3270]	protein_coding	1351.7	-0.452104	0.159783	-0.325147	0.18348	-2.82948	0.0046624	0.100097	1529.98	1251.66	1877.58	1585.71	937.401	1229.63	1258.9	1142.79
MOB3B	ENSG00000120162	79817	MOB kinase activator 3B [Source:HGNC Symbol;Acc:HGNC:23825]	protein_coding	122.273	0.949287	0.335615	0.598432	0.483114	2.8285	0.00467664	0.100248	67.2906	65.3673	117.204	85.2312	210.982	109.366	162.283	160.461
ORC2	ENSG00000115942	4999	origin recognition complex subunit 2 [Source:HGNC Symbol;Acc:HGNC:8488]	protein_coding	714.022	-0.613961	0.217112	-0.413283	0.272133	-2.82785	0.00468616	0.100297	1100.26	745.672	699.74	901.016	478.048	753.737	482.049	551.653
TPCN1	ENSG00000186815	53373	two pore segment channel 1 [Source:HGNC Symbol;Acc:HGNC:18182]	protein_coding	380.733	0.905872	0.321024	0.569586	0.461889	2.82182	0.00477524	0.102046	141.664	386.152	277.343	254.07	344.515	602.99	523.34	515.793
ZNF200	ENSG00000010539	7752	zinc finger protein 200 [Source:HGNC Symbol;Acc:HGNC:12993]	protein_coding	229.626	-0.673049	0.238577	-0.446289	0.306871	-2.82109	0.00478603	0.102119	257.357	335.31	250.653	287.757	233.683	144.836	148.84	178.572
NCK2	ENSG00000071051	8440	NCK adaptor protein 2 [Source:HGNC Symbol;Acc:HGNC:7665]	protein_coding	239.086	-0.833296	0.295853	-0.529105	0.412222	-2.81659	0.00485363	0.103236	247.913	429.73	225.124	324.69	138.874	147.792	224.7	173.863
OSBP2	ENSG00000184792	23762	oxysterol binding protein 2 [Source:HGNC Symbol;Acc:HGNC:8504]	protein_coding	147.009	1.50442	0.534238	0.846029	1.09552	2.81601	0.00486236	0.103236	107.429	118.63	15.0856	66.1557	200.299	180.306	242.945	245.219
PECR	ENSG00000115425	55825	peroxisomal trans-2-enoyl-CoA reductase [Source:HGNC Symbol;Acc:HGNC:18281]	protein_coding	110.248	0.723363	0.256912	0.472651	0.339281	2.81561	0.00486846	0.103236	70.8322	70.2094	103.278	87.2606	140.21	141.88	138.277	130.035
POM121C	ENSG00000272391	100101267	POM121 transmembrane nucleoporin C [Source:HGNC Symbol;Acc:HGNC:34005]	protein_coding	1319.34	-0.341441	0.121287	-0.257418	0.131153	-2.81514	0.00487558	0.103236	1611.43	1554.29	1217.29	1513.87	1248.53	1167.55	1089.89	1151.84
RPL15	ENSG00000174748	6138	ribosomal protein L15 [Source:HGNC Symbol;Acc:HGNC:10306]	protein_coding	22510.8	0.308466	0.109514	0.239858	0.116041	2.81668	0.00485222	0.103236	17034	18476	23061.2	21876	27128.5	24905.8	24501	23104.2
FOXE1	ENSG00000178919	2304	forkhead box E1 [Source:HGNC Symbol;Acc:HGNC:3806]	protein_coding	73.3591	-2.02901	0.720903	-0.0461005	0.12596	-2.81454	0.00488474	0.103272	165.275	162.208	10.4439	133.123	28.0419	29.5583	36.4898	21.7329
CKS2	ENSG00000123975	1164	CDC28 protein kinase regulatory subunit 2 [Source:HGNC Symbol;Acc:HGNC:2000]	protein_coding	2280.41	0.405312	0.144106	0.296841	0.16155	2.81259	0.0049144	0.103741	1618.52	1693.5	2360.32	2172.18	2649.29	2610	2774.18	2365.26
LCORL	ENSG00000178177	254251	ligand dependent nuclear receptor corepressor like [Source:HGNC Symbol;Acc:HGNC:30776]	protein_coding	457.482	0.67427	0.240039	0.444928	0.311012	2.809	0.00496954	0.104746	383.675	233.628	444.445	348.636	444.664	564.564	674.1	566.141
PPM1A	ENSG00000100614	5494	protein phosphatase, Mg2+/Mn2+ dependent 1A [Source:HGNC Symbol;Acc:HGNC:9275]	protein_coding	634.321	0.331999	0.118281	0.252935	0.127338	2.80687	0.00500251	0.10528	546.589	513.255	569.772	608.389	719.742	753.737	706.749	656.333
SERF2	ENSG00000140264	10169	small EDRK-rich factor 2 [Source:HGNC Symbol;Acc:HGNC:10757]	protein_coding	2888.26	0.364414	0.129869	0.273223	0.142257	2.80602	0.00501577	0.1054	2316.21	2228.54	2701.48	2853.62	3772.3	2923.32	3406.03	2904.6
PRKG2	ENSG00000138669	5593	protein kinase cGMP-dependent 2 [Source:HGNC Symbol;Acc:HGNC:9416]	protein_coding	32.5222	4.41373	1.574	0.0144618	0.113703	2.80415	0.00504492	0.105788	1.18054	8.47354	2.32086	0	1.33533	127.101	0.960257	118.806
SLX4IP	ENSG00000149346	128710	SLX4 interacting protein [Source:HGNC Symbol;Acc:HGNC:16225]	protein_coding	153.455	-1.07123	0.382057	-0.615766	0.653331	-2.80386	0.0050495	0.105788	305.759	137.998	160.139	223.225	81.4551	153.703	70.0988	95.2624
GYS1	ENSG00000104812	2997	glycogen synthase 1 [Source:HGNC Symbol;Acc:HGNC:4706]	protein_coding	600.951	-0.563374	0.201297	-0.382232	0.247119	-2.79872	0.00513057	0.107162	777.974	825.565	518.713	745.165	591.551	455.198	413.871	479.572
RAB29	ENSG00000117280	8934	RAB29, member RAS oncogene family [Source:HGNC Symbol;Acc:HGNC:9789]	protein_coding	425.683	0.798972	0.285475	0.506089	0.397502	2.79874	0.00513017	0.107162	169.997	302.627	464.172	306.021	530.126	552.74	531.022	548.755
FBRSL1	ENSG00000112787	57666	fibrosin like 1 [Source:HGNC Symbol;Acc:HGNC:29308]	protein_coding	691.939	0.387284	0.138404	0.285255	0.153633	2.79821	0.00513873	0.107171	547.769	696.041	554.686	605.142	833.245	679.841	833.503	785.281
ELFN1	ENSG00000225968	392617	extracellular leucine rich repeat and fibronectin type III domain containing 1 [Source:HGNC Symbol;Acc:HGNC:33154]	protein_coding	24.4958	1.97956	0.707648	0.0489021	0.127679	2.79739	0.00515179	0.107283	5.90269	7.26304	17.4065	9.33485	74.7784	20.6908	24.0064	36.5837
ZNF559	ENSG00000188321	84527	zinc finger protein 559 [Source:HGNC Symbol;Acc:HGNC:28197]	protein_coding	120.019	-1.88578	0.674757	-0.0498079	0.128277	-2.79475	0.00519393	0.107998	80.2765	277.206	182.188	214.702	102.82	56.1608	7.68206	39.1192
C8orf76	ENSG00000189376	84933	chromosome 8 open reading frame 76 [Source:HGNC Symbol;Acc:HGNC:25924]	protein_coding	68.2689	-2.13067	0.762967	-0.0417784	0.123434	-2.79261	0.00522853	0.108555	23.6107	102.893	191.471	123.382	6.67664	59.1166	20.1654	18.8352
	ENSG00000286070		novel protein	protein_coding	9.09876	-6.48201	2.32242	-0.0080855	0.112791	-2.79106	0.00525358	0.108912	11.8054	43.5782	17.4065	0	0	0	0	0
LRRC66	ENSG00000188993	339977	leucine rich repeat containing 66 [Source:HGNC Symbol;Acc:HGNC:34299]	protein_coding	8.74696	5.04703	1.80884	0.0137737	0.113575	2.79021	0.00526747	0.109037	2.36107	0	0	0	2.67066	2.95583	32.6487	29.3394
B3GALNT2	ENSG00000162885	148789	beta-1,3-N-acetylgalactosaminyltransferase 2 [Source:HGNC Symbol;Acc:HGNC:28596]	protein_coding	570.412	-0.398133	0.142838	-0.288597	0.159729	-2.7873	0.005315	0.109693	548.95	737.198	655.644	657.498	512.766	440.419	512.777	498.045
PABPC4	ENSG00000090621	8761	poly(A) binding protein cytoplasmic 4 [Source:HGNC Symbol;Acc:HGNC:8557]	protein_coding	1530.52	-0.525674	0.188578	-0.360639	0.227257	-2.78756	0.00531065	0.109693	2204.06	1904.13	1220.77	1899.84	1386.07	1070.01	1335.72	1223.56
BEX3	ENSG00000166681	27018	brain expressed X-linked 3 [Source:HGNC Symbol;Acc:HGNC:13388]	protein_coding	3535.93	0.263111	0.0944492	0.209429	0.0979426	2.78574	0.00534053	0.110056	3265.37	3086.79	2946.33	3543.59	3692.18	4179.55	4034.04	3539.56
GLB1L2	ENSG00000149328	89944	galactosidase beta 1 like 2 [Source:HGNC Symbol;Acc:HGNC:25129]	protein_coding	235.571	-0.66903	0.240442	-0.434294	0.313837	-2.7825	0.00539422	0.110669	232.566	342.573	292.429	294.657	210.982	124.145	203.574	183.643
GLIS1	ENSG00000174332	148979	GLIS family zinc finger 1 [Source:HGNC Symbol;Acc:HGNC:29525]	protein_coding	6.4102	5.5985	2.01142	0.0114206	0.113207	2.78336	0.00537984	0.110669	0	0	0	0.405863	17.3593	0	28.8077	4.70879
KPNA1	ENSG00000114030	3836	karyopherin subunit alpha 1 [Source:HGNC Symbol;Acc:HGNC:6394]	protein_coding	1086.15	-0.365241	0.131246	-0.271491	0.14404	-2.78288	0.00538787	0.110669	1306.85	1228.66	1107.05	1256.55	874.64	839.456	1130.22	945.742
GCNA	ENSG00000147174	93953	germ cell nuclear acidic peptidase [Source:HGNC Symbol;Acc:HGNC:15805]	protein_coding	36.5348	-2.17257	0.781223	-0.0418842	0.123515	-2.78098	0.00541946	0.110949	66.1101	91.9985	13.9252	68.5909	13.3533	2.95583	25.9269	9.41758
ZNF611	ENSG00000213020	81856	zinc finger protein 611 [Source:HGNC Symbol;Acc:HGNC:28766]	protein_coding	125.608	-1.58768	0.57096	-0.0627853	0.138113	-2.78072	0.00542385	0.110949	48.402	321.995	177.546	203.337	68.1018	97.5424	33.609	54.3322
MYCBP2	ENSG00000005810	23077	MYC binding protein 2 [Source:HGNC Symbol;Acc:HGNC:23386]	protein_coding	1381.77	-0.349256	0.125759	-0.260667	0.13686	-2.77719	0.00548315	0.111668	1247.83	1737.08	1645.49	1565.41	1239.19	1155.73	1243.53	1219.94
NAGLU	ENSG00000108784	4669	N-acetyl-alpha-glucosaminidase [Source:HGNC Symbol;Acc:HGNC:7632]	protein_coding	416.56	0.442069	0.159156	0.31589	0.182937	2.77759	0.00547641	0.111668	339.995	302.627	374.819	389.629	444.664	529.094	513.737	437.917
PCNX3	ENSG00000197136	399909	pecanex 3 [Source:HGNC Symbol;Acc:HGNC:18760]	protein_coding	602.972	-0.480371	0.172933	-0.334292	0.203345	-2.77779	0.00547302	0.111668	610.338	812.25	674.21	714.725	622.263	452.242	434.996	502.754
INHBC	ENSG00000175189	3626	inhibin subunit beta C [Source:HGNC Symbol;Acc:HGNC:6068]	protein_coding	8.14905	6.59834	2.37939	0.00783917	0.112766	2.77313	0.00555201	0.112904	0	0	0	0	24.0359	32.5141	8.64231	0
ADGRD1	ENSG00000111452	283383	adhesion G protein-coupled receptor D1 [Source:HGNC Symbol;Acc:HGNC:19893]	protein_coding	8.91675	-4.08866	1.47509	-0.0180583	0.114398	-2.7718	0.00557465	0.113033	28.3329	1.21051	16.246	20.2932	1.33533	2.95583	0.960257	0
WDPCP	ENSG00000143951	51057	WD repeat containing planar cell polarity effector [Source:HGNC Symbol;Acc:HGNC:28027]	protein_coding	49.0827	-2.03483	0.734085	-0.0448337	0.125155	-2.77192	0.00557259	0.113033	162.914	50.8413	13.9252	87.6664	28.0419	17.735	16.3244	15.213
RPL34	ENSG00000109475	6164	ribosomal protein L34 [Source:HGNC Symbol;Acc:HGNC:10340]	protein_coding	10992.9	0.325781	0.117651	0.247685	0.126396	2.76904	0.00562225	0.113832	8913.06	8451.76	11817.8	9840.15	12924.6	12908.1	10932.5	12155.2
SP140L	ENSG00000185404	93349	SP140 nuclear body protein like [Source:HGNC Symbol;Acc:HGNC:25105]	protein_coding	18.0513	-3.71621	1.34244	-0.0195371	0.114775	-2.76826	0.00563566	0.113937	29.5134	1.21051	37.1338	65.7498	4.00599	2.95583	3.84103	0
CSNK1G1	ENSG00000169118	53944	casein kinase 1 gamma 1 [Source:HGNC Symbol;Acc:HGNC:2454]	protein_coding	338.173	-1.05967	0.382888	-0.587997	0.711399	-2.76757	0.00564761	0.114013	704.781	306.258	314.477	496.776	174.928	363.567	142.118	202.478
PPIL2	ENSG00000100023	23759	peptidylprolyl isomerase like 2 [Source:HGNC Symbol;Acc:HGNC:9261]	protein_coding	713.832	-0.388361	0.140379	-0.281888	0.156701	-2.76652	0.00566575	0.114139	768.53	941.774	698.58	822.684	580.868	691.664	591.518	615.04
UBOX5	ENSG00000185019	22888	U-box domain containing 5 [Source:HGNC Symbol;Acc:HGNC:17777]	protein_coding	55.6264	-2.267	0.819517	-0.0380078	0.121496	-2.76626	0.00567033	0.114139	17.7081	221.523	22.0482	106.336	22.7006	23.6466	17.2846	13.7642
MLEC	ENSG00000110917	9761	malectin [Source:HGNC Symbol;Acc:HGNC:28973]	protein_coding	2479.41	-0.175647	0.063552	-0.150153	0.0632545	-2.76383	0.00571276	0.114826	2723.5	2583.22	2534.38	2674.64	2243.35	2376.49	2380.48	2319.26
FBF1	ENSG00000188878	85302	Fas binding factor 1 [Source:HGNC Symbol;Acc:HGNC:24674]	protein_coding	115.773	-2.16469	0.783452	-0.04011	0.122566	-2.76301	0.00572704	0.114947	217.219	273.574	38.2942	229.718	81.4551	2.95583	57.6154	25.355
LRRC10B	ENSG00000204950	390205	leucine rich repeat containing 10B [Source:HGNC Symbol;Acc:HGNC:37215]	protein_coding	9.16865	-6.49304	2.35171	-0.00785685	0.112767	-2.76098	0.00576282	0.115498	5.90269	31.4732	35.9734	0	0	0	0	0
PGAP4	ENSG00000165152	84302	post-GPI attachment to proteins GalNAc transferase 4 [Source:HGNC Symbol;Acc:HGNC:28180]	protein_coding	529.601	-0.365028	0.132321	-0.267893	0.145595	-2.75865	0.00580403	0.116156	651.657	613.727	514.071	604.33	484.724	467.021	436.917	464.359
ATP7A	ENSG00000165240	538	ATPase copper transporting alpha [Source:HGNC Symbol;Acc:HGNC:869]	protein_coding	217.616	-0.696334	0.252758	-0.436476	0.344117	-2.75494	0.0058702	0.116382	342.356	228.786	225.124	278.828	200.299	171.438	126.754	167.343
DMBX1	ENSG00000197587	127343	diencephalon/mesencephalon homeobox 1 [Source:HGNC Symbol;Acc:HGNC:19026]	protein_coding	81.8553	-1.78867	0.649528	-0.0521794	0.129812	-2.7538	0.00589086	0.116382	262.079	42.3677	60.3424	142.458	18.6946	44.3375	53.7744	30.7882
EOLA1	ENSG00000197620	91966	endothelium and lymphocyte associated ASCH domain 1 [Source:HGNC Symbol;Acc:HGNC:28089]	protein_coding	712.618	0.325852	0.118326	0.245728	0.127211	2.75384	0.00589	0.116382	639.851	595.569	591.82	694.838	842.592	818.765	788.371	729.138
FAM181B	ENSG00000182103	220382	family with sequence similarity 181 member B [Source:HGNC Symbol;Acc:HGNC:28512]	protein_coding	3.6467	5.46319	1.9833	0.0119512	0.113279	2.75459	0.00587653	0.116382	0	0	0	0	4.00599	5.91166	10.5628	8.69315
FXR1	ENSG00000114416	8087	FMR1 autosomal homolog 1 [Source:HGNC Symbol;Acc:HGNC:4023]	protein_coding	2017.8	0.484693	0.175938	0.333563	0.208556	2.7549	0.00587093	0.116382	1169.91	1831.5	2063.25	1661.6	2506.41	2494.72	2033.82	2381.2
GPR4	ENSG00000177464	2828	G protein-coupled receptor 4 [Source:HGNC Symbol;Acc:HGNC:4497]	protein_coding	5.40452	-4.86802	1.76618	-0.0141077	0.113613	-2.75624	0.00584695	0.116382	11.8054	1.21051	15.0856	13.7993	1.33533	0	0	0
NFKBIE	ENSG00000146232	4794	NFKB inhibitor epsilon [Source:HGNC Symbol;Acc:HGNC:7799]	protein_coding	77.337	1.54453	0.560569	0.0650447	0.140099	2.7553	0.00586387	0.116382	14.1664	48.4203	60.3424	36.1218	92.1377	56.1608	191.091	120.255
NFYB	ENSG00000120837	4801	nuclear transcription factor Y subunit beta [Source:HGNC Symbol;Acc:HGNC:7805]	protein_coding	487.712	0.688622	0.24996	0.434867	0.337828	2.75493	0.00587043	0.116382	224.302	503.571	399.188	366.494	523.449	650.283	619.366	615.04
PI4K2B	ENSG00000038210	55300	phosphatidylinositol 4-kinase type 2 beta [Source:HGNC Symbol;Acc:HGNC:18215]	protein_coding	264.633	-0.518529	0.188121	-0.351565	0.226997	-2.75636	0.00584491	0.116382	257.357	331.679	349.29	312.515	210.982	189.173	242.945	223.124
BYSL	ENSG00000112578	705	bystin like [Source:HGNC Symbol;Acc:HGNC:1157]	protein_coding	500.831	-0.598412	0.217439	-0.389773	0.276964	-2.75208	0.00592172	0.116506	448.604	669.41	683.494	616.1	500.748	298.539	389.864	399.885
KIAA0753	ENSG00000198920	9851	KIAA0753 [Source:HGNC Symbol;Acc:HGNC:29110]	protein_coding	290.996	-0.679948	0.247045	-0.427296	0.334164	-2.75232	0.00591743	0.116506	424.993	383.731	246.011	374.206	231.012	271.936	174.767	221.313
MFAP3	ENSG00000037749	4238	microfibril associated protein 3 [Source:HGNC Symbol;Acc:HGNC:7034]	protein_coding	549.047	-0.443654	0.161209	-0.311619	0.185997	-2.75205	0.00592233	0.116506	721.308	579.833	590.659	645.728	540.808	372.435	477.248	464.359
CD9	ENSG00000010278	928	CD9 molecule [Source:HGNC Symbol;Acc:HGNC:1709]	protein_coding	732.77	0.450687	0.163987	0.315442	0.190359	2.74831	0.00599041	0.11761	612.699	687.568	560.488	618.129	1057.58	756.693	716.352	852.653
RPL35A	ENSG00000182899	6165	ribosomal protein L35a [Source:HGNC Symbol;Acc:HGNC:10345]	protein_coding	6856.84	0.295035	0.10738	0.229624	0.113512	2.74757	0.00600389	0.11761	5890.88	5535.65	6659.71	6548.6	8798.48	6733.38	7514.01	7174.02
WFDC2	ENSG00000101443	10406	WAP four-disulfide core domain 2 [Source:HGNC Symbol;Acc:HGNC:15939]	protein_coding	7.36141	-5.56962	2.0268	-0.0107891	0.113115	-2.74799	0.00599614	0.11761	0	36.3152	10.4439	11.77	0	0	0	0.362214
NELFE	ENSG00000204356	7936	negative elongation factor complex member E [Source:HGNC Symbol;Acc:HGNC:13974]	protein_coding	723.664	0.374008	0.13618	0.272614	0.150821	2.74641	0.00602505	0.117791	513.534	679.094	641.718	681.85	833.245	854.235	823.9	761.737
PARD3B	ENSG00000116117	117583	par-3 family cell polarity regulator beta [Source:HGNC Symbol;Acc:HGNC:14446]	protein_coding	86.2696	-1.07438	0.391232	-0.56901	0.823987	-2.74614	0.00603013	0.117791	147.567	83.5249	113.722	121.353	29.3772	73.8958	65.2975	55.4188
NEDD8	ENSG00000129559	4738	NEDD8 ubiquitin like modifier [Source:HGNC Symbol;Acc:HGNC:7732]	protein_coding	1031.76	0.376457	0.13717	0.273868	0.152126	2.74445	0.00606129	0.118178	820.473	765.04	1093.13	912.786	1152.39	1149.82	1211.84	1148.58
OLFML2A	ENSG00000185585	169611	olfactomedin like 2A [Source:HGNC Symbol;Acc:HGNC:27270]	protein_coding	47.8353	-4.11028	1.49834	-0.0152658	0.113848	-2.74322	0.00608401	0.118178	180.622	1.21051	12.7647	166.81	17.3593	2.95583	0.960257	0
PIK3C2A	ENSG00000011405	5286	phosphatidylinositol-4-phosphate 3-kinase catalytic subunit type 2 alpha [Source:HGNC Symbol;Acc:HGNC:8971]	protein_coding	714.582	-0.720167	0.262451	-0.436018	0.370022	-2.74401	0.00606941	0.118178	995.193	683.936	945.751	935.92	361.874	455.198	814.298	524.487
SDC3	ENSG00000162512	9672	syndecan 3 [Source:HGNC Symbol;Acc:HGNC:10660]	protein_coding	562.612	0.521662	0.190138	0.350645	0.231637	2.74359	0.00607709	0.118178	387.216	492.676	502.467	461.06	718.407	786.251	490.691	662.128
COX5A	ENSG00000178741	9377	cytochrome c oxidase subunit 5A [Source:HGNC Symbol;Acc:HGNC:2267]	protein_coding	1999.82	-0.425896	0.155438	-0.300089	0.177832	-2.73997	0.0061444	0.118521	2428.36	2224.91	2168.85	2360.09	2060.41	1229.63	1839.85	1686.47
CREBL2	ENSG00000111269	1389	cAMP responsive element binding protein like 2 [Source:HGNC Symbol;Acc:HGNC:2350]	protein_coding	324.455	0.615784	0.224601	0.397515	0.290241	2.74167	0.00611273	0.118521	192.428	249.364	324.921	260.564	459.353	313.318	405.228	390.467
DUSP3	ENSG00000108861	1845	dual specificity phosphatase 3 [Source:HGNC Symbol;Acc:HGNC:3069]	protein_coding	1414.22	-0.395844	0.1444	-0.284095	0.162149	-2.74131	0.00611945	0.118521	1925.46	1439.29	1407.6	1656.73	1074.94	1208.93	1400.05	1200.74
RBP7	ENSG00000162444	116362	retinol binding protein 7 [Source:HGNC Symbol;Acc:HGNC:30316]	protein_coding	172.733	0.883012	0.322258	0.513776	0.513069	2.74008	0.00614249	0.118521	97.9846	131.945	135.77	120.135	331.162	203.952	139.237	221.675
VPS13D	ENSG00000048707	55187	vacuolar protein sorting 13 homolog D [Source:HGNC Symbol;Acc:HGNC:23595]	protein_coding	691.784	-0.429557	0.156746	-0.302197	0.179495	-2.74047	0.0061351	0.118521	748.461	815.881	819.264	802.391	658.317	437.463	663.538	588.961
GALNTL6	ENSG00000174473	442117	polypeptide N-acetylgalactosaminyltransferase like 6 [Source:HGNC Symbol;Acc:HGNC:33844]	protein_coding	20.1763	-4.51196	1.64789	-0.0138139	0.113573	-2.73802	0.00618105	0.118833	69.6517	9.68405	0	73.8671	1.33533	5.91166	0.960257	0
NEK5	ENSG00000197168	341676	NIMA related kinase 5 [Source:HGNC Symbol;Acc:HGNC:7748]	protein_coding	14.8927	4.71378	1.72164	0.0133342	0.1135	2.73796	0.00618214	0.118833	1.18054	0	3.48129	0	6.67664	0	64.3372	43.4657
PPIA	ENSG00000196262	5478	peptidylprolyl isomerase A [Source:HGNC Symbol;Acc:HGNC:9253]	protein_coding	20185.6	0.319161	0.116578	0.24061	0.124904	2.73774	0.00618628	0.118833	15233.7	16408.4	21047.9	19153.9	25327.2	21837.7	21306.2	21169.6
FAM71A	ENSG00000162771	149647	family with sequence similarity 71 member A [Source:HGNC Symbol;Acc:HGNC:26541]	protein_coding	13.3477	-4.4287	1.61952	-0.0145489	0.113687	-2.73457	0.0062461	0.119415	15.347	35.1047	1.16043	48.2977	0	5.91166	0.960257	0
MTFR1L	ENSG00000117640	56181	mitochondrial fission regulator 1 like [Source:HGNC Symbol;Acc:HGNC:28836]	protein_coding	434.461	-0.372444	0.136233	-0.270276	0.150753	-2.73386	0.00625961	0.119415	430.896	499.939	544.242	488.253	383.239	363.567	378.341	387.207
PELI1	ENSG00000197329	57162	pellino E3 ubiquitin protein ligase 1 [Source:HGNC Symbol;Acc:HGNC:8827]	protein_coding	210.243	-0.66002	0.241407	-0.411374	0.326594	-2.73405	0.00625599	0.119415	256.177	240.891	265.739	261.782	113.503	221.687	158.442	163.721
TCEA3	ENSG00000204219	6920	transcription elongation factor A3 [Source:HGNC Symbol;Acc:HGNC:11615]	protein_coding	15.6205	-5.09753	1.86444	-0.0117643	0.113253	-2.73409	0.00625534	0.119415	75.5544	0	2.32086	43.8332	1.33533	0	1.92051	0
UFL1	ENSG00000014123	23376	UFM1 specific ligase 1 [Source:HGNC Symbol;Acc:HGNC:23039]	protein_coding	327.81	-0.585978	0.214306	-0.378844	0.273654	-2.73431	0.00625106	0.119415	419.091	415.204	334.204	402.616	185.611	307.406	298.64	259.708
GRAMD1C	ENSG00000178075	54762	GRAM domain containing 1C [Source:HGNC Symbol;Acc:HGNC:25252]	protein_coding	172.13	-0.986308	0.361288	-0.533631	0.687082	-2.72998	0.0063338	0.120664	211.316	344.994	112.562	246.765	117.509	106.41	124.833	112.649
H3C10	ENSG00000278828	8357	H3 clustered histone 10 [Source:HGNC Symbol;Acc:HGNC:4775]	protein_coding	23.9029	-3.80838	1.39625	-0.0178055	0.11437	-2.72758	0.00638007	0.121379	1.18054	56.8938	31.3316	88.884	1.33533	2.95583	8.64231	0
TRDMT1	ENSG00000107614	1787	tRNA aspartic acid methyltransferase 1 [Source:HGNC Symbol;Acc:HGNC:2977]	protein_coding	215.456	-0.780404	0.286227	-0.463424	0.424842	-2.72652	0.00640062	0.121603	321.106	231.207	262.257	276.799	235.018	118.233	122.913	156.114
IL32	ENSG00000008517	9235	interleukin 32 [Source:HGNC Symbol;Acc:HGNC:16830]	protein_coding	11.4661	4.3373	1.59166	0.0155747	0.113903	2.72501	0.00643005	0.121995	0	0	4.64172	0	5.34132	14.7792	27.8475	39.1192
APAF1	ENSG00000120868	317	apoptotic peptidase activating factor 1 [Source:HGNC Symbol;Acc:HGNC:576]	protein_coding	520.842	-0.441746	0.162273	-0.306058	0.188109	-2.72224	0.00648401	0.122017	731.933	507.202	548.884	612.853	474.042	419.728	430.195	441.902
PER1	ENSG00000179094	5187	period circadian regulator 1 [Source:HGNC Symbol;Acc:HGNC:8845]	protein_coding	347.705	0.672737	0.247116	0.41809	0.336423	2.72235	0.00648192	0.122017	361.244	244.522	205.396	264.623	431.311	316.274	518.539	439.728
PIDD1	ENSG00000177595	55367	p53-induced death domain protein 1 [Source:HGNC Symbol;Acc:HGNC:16491]	protein_coding	320.332	-1.0395	0.381664	-0.527488	0.927482	-2.72361	0.00645734	0.122017	309.301	666.989	272.701	470.801	241.695	292.627	113.31	195.234
POLR3B	ENSG00000013503	55703	RNA polymerase III subunit B [Source:HGNC Symbol;Acc:HGNC:30348]	protein_coding	416.856	-0.51803	0.190141	-0.345233	0.231661	-2.72446	0.00644077	0.122017	380.133	595.569	492.023	500.023	367.215	289.671	363.937	346.277
RMND1	ENSG00000155906	55005	required for meiotic nuclear division 1 homolog [Source:HGNC Symbol;Acc:HGNC:21176]	protein_coding	326.254	0.562912	0.206774	0.366628	0.260562	2.72235	0.0064819	0.122017	184.164	305.048	297.07	265.84	388.581	416.772	369.699	382.861
SLC5A5	ENSG00000105641	6528	solute carrier family 5 member 5 [Source:HGNC Symbol;Acc:HGNC:11040]	protein_coding	196.431	-0.708859	0.260371	-0.428496	0.369097	-2.72249	0.00647917	0.122017	310.481	194.892	214.68	251.229	114.838	189.173	146.919	149.232
CXXC5	ENSG00000171604	51523	CXXC finger protein 5 [Source:HGNC Symbol;Acc:HGNC:26943]	protein_coding	122.274	0.755912	0.277949	0.451206	0.406792	2.71961	0.00653587	0.122671	101.526	59.3148	109.081	92.9426	157.569	162.571	145.959	149.232
RNASEH1	ENSG00000171865	246243	ribonuclease H1 [Source:HGNC Symbol;Acc:HGNC:18466]	protein_coding	555.366	-0.535283	0.196825	-0.352904	0.242848	-2.71958	0.00653644	0.122671	743.738	579.833	634.756	677.791	425.97	339.921	589.598	451.319
EPM2A	ENSG00000112425	7957	EPM2A glucan phosphatase, laforin [Source:HGNC Symbol;Acc:HGNC:3413]	protein_coding	86.3126	-1.62112	0.596431	-0.0574129	0.133527	-2.71803	0.00656724	0.123083	166.456	135.577	78.9093	136.776	54.7485	73.8958	8.64231	35.497
GABBR1	ENSG00000204681	2550	gamma-aminobutyric acid type B receptor subunit 1 [Source:HGNC Symbol;Acc:HGNC:4070]	protein_coding	282.258	-1.25739	0.462774	-0.0841238	0.160558	-2.71708	0.00658616	0.12327	492.284	499.939	150.856	445.232	76.1137	271.936	175.727	145.972
ARID3B	ENSG00000179361	10620	AT-rich interaction domain 3B [Source:HGNC Symbol;Acc:HGNC:14350]	protein_coding	519.53	0.669258	0.246763	0.412435	0.338119	2.71215	0.00668488	0.124856	528.881	305.048	384.103	390.44	579.533	467.021	848.867	652.348
COX6C	ENSG00000164919	1345	cytochrome c oxidase subunit 6C [Source:HGNC Symbol;Acc:HGNC:2285]	protein_coding	2119.96	0.419144	0.154554	0.286177	0.177067	2.71195	0.00668885	0.124856	1508.73	1554.29	2375.4	1815.83	2374.21	2571.57	2341.11	2418.51
SLC30A4	ENSG00000104154	7782	solute carrier family 30 member 4 [Source:HGNC Symbol;Acc:HGNC:11015]	protein_coding	184.943	-1.80517	0.666166	-0.0491495	0.127734	-2.70979	0.00673255	0.125502	348.258	394.625	68.4654	338.896	188.281	56.1608	24.0064	60.852
PSMB3	ENSG00000277791	5691	proteasome 20S subunit beta 3 [Source:HGNC Symbol;Acc:HGNC:9540]	protein_coding	1985.15	0.498669	0.18414	0.334664	0.222346	2.70809	0.00676714	0.125978	1226.58	1433.24	2296.49	1625.89	2304.78	2290.77	2360.31	2343.17
ARG2	ENSG00000081181	384	arginase 2 [Source:HGNC Symbol;Acc:HGNC:664]	protein_coding	431.19	0.518645	0.191553	0.342829	0.235284	2.70758	0.00677747	0.126001	420.271	348.626	294.749	349.854	460.688	629.592	432.116	513.62
SUPT7L	ENSG00000119760	9913	SPT7 like, STAGA complex subunit gamma [Source:HGNC Symbol;Acc:HGNC:30632]	protein_coding	631.149	-0.646517	0.239044	-0.398737	0.323661	-2.7046	0.00683874	0.12697	927.902	865.512	467.654	821.873	448.67	443.375	595.359	478.848
SNRPB2	ENSG00000125870	6629	small nuclear ribonucleoprotein polypeptide B2 [Source:HGNC Symbol;Acc:HGNC:11155]	protein_coding	1373.39	0.466769	0.172665	0.318278	0.20426	2.70332	0.00686508	0.127289	1081.37	859.46	1521.33	1149.81	1522.27	1625.71	1633.4	1593.74
INIP	ENSG00000148153	58493	INTS3 and NABP interacting protein [Source:HGNC Symbol;Acc:HGNC:24994]	protein_coding	446.813	0.488906	0.1809	0.327093	0.217672	2.70263	0.00687926	0.127381	427.354	332.889	351.611	372.582	596.892	564.564	408.109	520.502
NRG2	ENSG00000158458	9542	neuregulin 2 [Source:HGNC Symbol;Acc:HGNC:7998]	protein_coding	75.693	1.27887	0.473302	0.0820757	0.157893	2.70201	0.00689207	0.127401	38.9577	36.3152	59.182	42.6156	44.0659	109.366	164.204	110.838
PMEL	ENSG00000185664	6490	premelanosome protein [Source:HGNC Symbol;Acc:HGNC:10880]	protein_coding	42.9356	1.38193	0.511506	0.0739062	0.148562	2.70169	0.00689873	0.127401	29.5134	16.9471	25.5295	23.9459	34.7185	47.2933	101.787	63.7498
MX1	ENSG00000157601	4599	MX dynamin like GTPase 1 [Source:HGNC Symbol;Acc:HGNC:7532]	protein_coding	10.3332	-6.6648	2.46771	-0.00702654	0.112688	-2.7008	0.00691732	0.127575	31.8745	49.6308	1.16043	0	0	0	0	0
COL25A1	ENSG00000188517	84570	collagen type XXV alpha 1 chain [Source:HGNC Symbol;Acc:HGNC:18603]	protein_coding	182.465	-0.763015	0.282985	-0.437001	0.436632	-2.69631	0.0070113	0.128539	197.15	226.365	257.616	234.589	170.922	153.703	83.5424	135.83
DHX16	ENSG00000204560	8449	DEAH-box helicase 16 [Source:HGNC Symbol;Acc:HGNC:2739]	protein_coding	655.591	-0.456437	0.169229	-0.308654	0.198933	-2.69716	0.00699338	0.128539	861.792	783.198	608.066	784.127	492.736	508.403	658.736	547.668
ICA1L	ENSG00000163596	130026	islet cell autoantigen 1 like [Source:HGNC Symbol;Acc:HGNC:14442]	protein_coding	50.6152	2.40949	0.893846	0.0330932	0.119243	2.69565	0.00702519	0.128539	35.4161	16.9471	2.32086	10.1466	24.0359	29.5583	187.25	99.2468
SLCO4C1	ENSG00000173930	353189	solute carrier organic anion transporter family member 4C1 [Source:HGNC Symbol;Acc:HGNC:23612]	protein_coding	92.7964	-1.1673	0.432907	-0.0950396	0.175605	-2.69642	0.00700891	0.128539	162.914	64.1568	155.498	133.529	52.0778	35.47	82.5821	56.1432
SYNPO	ENSG00000171992	11346	synaptopodin [Source:HGNC Symbol;Acc:HGNC:30672]	protein_coding	78.288	1.82033	0.675217	0.0486763	0.127421	2.69592	0.00701936	0.128539	29.5134	31.4732	49.8985	28.4104	173.593	11.8233	166.124	135.468
TMEM191B	ENSG00000278558	728229	transmembrane protein 191B [Source:HGNC Symbol;Acc:HGNC:33600]	protein_coding	8.44413	5.83308	2.16236	0.0093625	0.112926	2.69755	0.00698514	0.128539	0	0	1.16043	0	13.3533	8.86749	44.1718	0
LRCH4	ENSG00000077454	4034	leucine rich repeats and calponin homology domain containing 4 [Source:HGNC Symbol;Acc:HGNC:6691]	protein_coding	76.4656	1.11734	0.414717	0.101653	0.185991	2.69422	0.00705532	0.12892	44.8604	71.4199	29.0108	47.0801	129.527	121.189	67.218	101.42
RPL11	ENSG00000142676	6135	ribosomal protein L11 [Source:HGNC Symbol;Acc:HGNC:10301]	protein_coding	20395	0.279076	0.103602	0.214931	0.108518	2.69373	0.00706575	0.128929	17258.3	16504	20551.2	19396.6	25801.2	21760.8	20462.1	21425.3
TBC1D5	ENSG00000131374	9779	TBC1 domain family member 5 [Source:HGNC Symbol;Acc:HGNC:19166]	protein_coding	175.595	-1.06849	0.396717	-0.111708	0.20513	-2.69332	0.00707443	0.128929	347.078	150.103	201.915	255.694	141.545	53.205	146.919	108.302
LRRC27	ENSG00000148814	80313	leucine rich repeat containing 27 [Source:HGNC Symbol;Acc:HGNC:29346]	protein_coding	51.1528	-1.73563	0.645253	-0.0514546	0.129164	-2.68984	0.00714856	0.130109	72.0128	131.945	23.2086	85.6371	29.3772	35.47	10.5628	21.0084
CELF3	ENSG00000159409	11189	CUGBP Elav-like family member 3 [Source:HGNC Symbol;Acc:HGNC:11967]	protein_coding	8.09756	-5.43175	2.022	-0.0104768	0.113062	-2.68632	0.00722435	0.131173	33.055	8.47354	0	21.9166	1.33533	0	0	0
IGFL4	ENSG00000204869	444882	IGF like family member 4 [Source:HGNC Symbol;Acc:HGNC:32931]	protein_coding	20.7085	-4.2504	1.58228	-0.0146005	0.113713	-2.68625	0.00722593	0.131173	1.18054	101.683	1.16043	52.7622	4.00599	2.95583	1.92051	0
EVL	ENSG00000196405	51466	Enah/Vasp-like [Source:HGNC Symbol;Acc:HGNC:20234]	protein_coding	565.776	0.3598	0.133985	0.258893	0.147806	2.68537	0.00724501	0.131348	499.367	430.94	507.108	536.145	636.952	709.399	615.525	590.772
WIPI2	ENSG00000157954	26100	WD repeat domain, phosphoinositide interacting 2 [Source:HGNC Symbol;Acc:HGNC:32225]	protein_coding	822.674	0.394058	0.146777	0.278541	0.165609	2.68474	0.00725871	0.131424	713.044	784.408	637.077	709.043	1100.31	919.263	776.848	941.395
ARIH1	ENSG00000166233	25820	ariadne RBR E3 ubiquitin protein ligase 1 [Source:HGNC Symbol;Acc:HGNC:689]	protein_coding	1317.78	-0.408666	0.152279	-0.286672	0.17332	-2.68367	0.00728192	0.131501	1650.39	1394.5	1431.97	1546.34	1276.57	842.412	1274.26	1125.76
MIA3	ENSG00000154305	375056	MIA SH3 domain ER export factor 3 [Source:HGNC Symbol;Acc:HGNC:24008]	protein_coding	1268.26	-0.411074	0.153156	-0.287924	0.174706	-2.68402	0.00727422	0.131501	1626.78	1473.19	1197.56	1498.04	962.772	990.203	1329	1068.53
CNTFR	ENSG00000122756	1271	ciliary neurotrophic factor receptor [Source:HGNC Symbol;Acc:HGNC:2170]	protein_coding	55.6043	-1.55071	0.578089	-0.0609147	0.136298	-2.68248	0.00730782	0.131761	43.6799	91.9985	107.92	89.6957	13.3533	17.735	54.7346	25.7172
THOC7	ENSG00000163634	80145	THO complex 7 [Source:HGNC Symbol;Acc:HGNC:29874]	protein_coding	671.933	0.659531	0.245898	0.396384	0.343543	2.68214	0.00731533	0.131761	421.452	466.045	684.654	509.358	984.137	948.822	527.181	833.818
FAM89A	ENSG00000182118	375061	family with sequence similarity 89 member A [Source:HGNC Symbol;Acc:HGNC:25057]	protein_coding	232.761	-1.13223	0.422441	-0.0969558	0.178411	-2.68022	0.00735735	0.132292	471.034	116.209	345.808	347.419	184.275	97.5424	163.244	136.555
MRPS24	ENSG00000062582	64951	mitochondrial ribosomal protein S24 [Source:HGNC Symbol;Acc:HGNC:14510]	protein_coding	8.94218	4.42714	1.65223	0.0152375	0.113832	2.67949	0.00737342	0.132292	0	0	3.48129	0	24.0359	2.95583	18.2449	22.8195
PSEN2	ENSG00000143801	5664	presenilin 2 [Source:HGNC Symbol;Acc:HGNC:9509]	protein_coding	47.5229	4.37562	1.63292	0.013091	0.113456	2.67963	0.00737026	0.132292	15.347	1.21051	1.16043	0	1.33533	227.599	0.960257	132.571
UGDH	ENSG00000109814	7358	UDP-glucose 6-dehydrogenase [Source:HGNC Symbol;Acc:HGNC:12525]	protein_coding	188.359	-1.78397	0.666222	-0.0483725	0.12718	-2.67775	0.00741189	0.132811	165.275	106.525	478.098	412.357	56.0838	209.864	29.768	48.899
CD274	ENSG00000120217	29126	CD274 molecule [Source:HGNC Symbol;Acc:HGNC:17635]	protein_coding	18.2259	-3.95906	1.47985	-0.0163732	0.114051	-2.67531	0.00746611	0.133526	15.347	4.84203	34.8129	81.1726	6.67664	2.95583	0	0
LMNB1	ENSG00000113368	4001	lamin B1 [Source:HGNC Symbol;Acc:HGNC:6637]	protein_coding	1866.57	-0.308535	0.115355	-0.227075	0.122892	-2.67465	0.00748069	0.133526	1954.97	2066.33	2135.19	2106.02	1394.08	1690.74	1923.39	1661.84
PFKFB3	ENSG00000170525	5209	6-phosphofructo-2-kinase/fructose-2,6-biphosphatase 3 [Source:HGNC Symbol;Acc:HGNC:8874]	protein_coding	833.721	-0.292978	0.109527	-0.226904	0.115995	-2.67493	0.00747451	0.133526	890.125	955.09	893.532	929.426	655.646	806.942	787.411	751.595
RNF25	ENSG00000163481	64320	ring finger protein 25 [Source:HGNC Symbol;Acc:HGNC:14662]	protein_coding	310.537	-0.662275	0.247696	-0.395011	0.34713	-2.67375	0.00750087	0.133714	336.453	455.15	342.327	394.093	303.12	150.747	264.071	238.337
HYKK	ENSG00000188266	123688	hydroxylysine kinase [Source:HGNC Symbol;Acc:HGNC:34403]	protein_coding	159.633	-5.63659	2.10903	-0.00807087	0.112787	-2.67259	0.00752672	0.134003	1.18054	1.21051	854.077	395.311	21.3653	2.95583	0.960257	0
PLEKHG5	ENSG00000171680	57449	pleckstrin homology and RhoGEF domain containing G5 [Source:HGNC Symbol;Acc:HGNC:29105]	protein_coding	146.005	-0.778683	0.291446	-0.428314	0.477409	-2.6718	0.00754465	0.13415	132.22	255.417	160.139	189.944	120.18	106.41	95.0654	108.664
FOXF1	ENSG00000103241	2294	forkhead box F1 [Source:HGNC Symbol;Acc:HGNC:3809]	protein_coding	33.0177	2.6495	0.992108	0.0285904	0.117479	2.67057	0.00757218	0.134467	16.5275	2.42101	12.7647	4.87036	105.491	56.1608	2.88077	63.0253
KXD1	ENSG00000105700	79036	KxDL motif containing 1 [Source:HGNC Symbol;Acc:HGNC:28420]	protein_coding	1201.26	-0.456279	0.171016	-0.303671	0.202456	-2.66805	0.00762927	0.135307	1227.76	1786.71	1097.77	1443.65	1092.3	1055.23	911.284	995.365
NRF1	ENSG00000106459	4899	nuclear respiratory factor 1 [Source:HGNC Symbol;Acc:HGNC:7996]	protein_coding	257.707	-0.819982	0.307585	-0.431582	0.556772	-2.66587	0.00767884	0.136012	433.257	233.628	300.552	349.448	271.072	153.703	136.356	183.643
PFDN2	ENSG00000143256	5202	prefoldin subunit 2 [Source:HGNC Symbol;Acc:HGNC:8867]	protein_coding	1005.86	0.472129	0.177251	0.312945	0.212161	2.66361	0.0077306	0.136755	733.114	789.25	1013.06	841.76	1313.96	863.103	1319.39	1173.21
GGH	ENSG00000137563	8836	gamma-glutamyl hydrolase [Source:HGNC Symbol;Acc:HGNC:4248]	protein_coding	748.821	0.410068	0.154021	0.282573	0.176299	2.66242	0.00775821	0.137068	656.379	513.255	683.494	711.884	926.718	936.998	784.53	777.312
ZSCAN31	ENSG00000235109	64288	zinc finger and SCAN domain containing 31 [Source:HGNC Symbol;Acc:HGNC:14097]	protein_coding	19.4223	3.79714	1.42706	0.0169703	0.114178	2.66081	0.00779532	0.137549	1.18054	8.47354	1.16043	0	2.67066	65.0283	7.68206	69.183
CTSS	ENSG00000163131	1520	cathepsin S [Source:HGNC Symbol;Acc:HGNC:2545]	protein_coding	6.31949	6.23934	2.34598	0.0080578	0.112786	2.65959	0.00782363	0.137873	0	0	0	0	18.6946	17.735	0	14.1264
CDC42SE2	ENSG00000158985	56990	CDC42 small effector 2 [Source:HGNC Symbol;Acc:HGNC:18547]	protein_coding	297.086	-0.914009	0.343768	-0.162158	0.372729	-2.6588	0.00784204	0.138022	239.649	570.148	327.242	417.633	146.886	174.394	301.521	199.218
SFSWAP	ENSG00000061936	6433	splicing factor SWAP [Source:HGNC Symbol;Acc:HGNC:10790]	protein_coding	930.214	0.303458	0.114159	0.226394	0.121446	2.65821	0.00785572	0.138088	894.847	831.618	715.986	883.158	1008.17	1067.06	1061.08	979.79
RPL29	ENSG00000162244	6159	ribosomal protein L29 [Source:HGNC Symbol;Acc:HGNC:10331]	protein_coding	27166.2	0.392469	0.147678	0.271339	0.166883	2.65759	0.00787005	0.138164	18182.6	20946.6	27848	26989.9	35167.2	31961.4	29286.9	26946.6
HMGCS1	ENSG00000112972	3157	3-hydroxy-3-methylglutaryl-CoA synthase 1 [Source:HGNC Symbol;Acc:HGNC:5007]	protein_coding	641.918	0.490661	0.184698	0.319951	0.224878	2.65655	0.00789447	0.138243	552.491	659.726	400.349	524.781	853.275	682.797	693.306	768.619
RHBDD1	ENSG00000144468	84236	rhomboid domain containing 1 [Source:HGNC Symbol;Acc:HGNC:23081]	protein_coding	298.609	-0.652065	0.245443	-0.383403	0.346627	-2.65668	0.00789136	0.138243	363.605	261.469	467.654	370.147	206.976	198.041	288.077	232.904
LONRF3	ENSG00000175556	79836	LON peptidase N-terminal domain and ring finger 3 [Source:HGNC Symbol;Acc:HGNC:21152]	protein_coding	285.134	-0.480679	0.181012	-0.313899	0.219071	-2.65552	0.00791868	0.138492	315.203	357.099	316.798	336.46	188.281	274.892	252.548	239.786
EIF3M	ENSG00000149100	10480	eukaryotic translation initiation factor 3 subunit M [Source:HGNC Symbol;Acc:HGNC:24460]	protein_coding	4773.02	0.339311	0.127836	0.245757	0.13926	2.65426	0.00794817	0.138833	3834.38	3607.31	5198.73	4219.76	5894.14	4900.77	5202.67	5326.36
LRPAP1	ENSG00000163956	4043	LDL receptor related protein associated protein 1 [Source:HGNC Symbol;Acc:HGNC:6701]	protein_coding	1240.8	0.31853	0.12004	0.234901	0.128941	2.65354	0.00796535	0.138958	1027.07	1039.82	1148.83	1199.73	1285.92	1344.9	1597.87	1282.24
RBIS	ENSG00000176731	401466	ribosomal biogenesis factor [Source:HGNC Symbol;Acc:HGNC:32235]	protein_coding	1593.8	0.534594	0.20163	0.337586	0.255394	2.65136	0.00801687	0.139681	1117.97	970.826	1843.93	1272.38	1662.48	2142.98	1836.01	1903.8
GLT8D1	ENSG00000016864	55830	glycosyltransferase 8 domain containing 1 [Source:HGNC Symbol;Acc:HGNC:24870]	protein_coding	705.833	-0.406197	0.153255	-0.278321	0.175325	-2.65046	0.00803817	0.139876	920.819	790.461	670.729	828.772	542.143	712.355	581.916	599.465
ANKLE1	ENSG00000160117	126549	ankyrin repeat and LEM domain containing 1 [Source:HGNC Symbol;Acc:HGNC:26812]	protein_coding	14.7256	-3.70014	1.39658	-0.0180883	0.114409	-2.64943	0.00806278	0.139972	53.1242	2.42101	11.6043	41.398	5.34132	2.95583	0.960257	0
VPS45	ENSG00000136631	11311	vacuolar protein sorting 45 homolog [Source:HGNC Symbol;Acc:HGNC:14579]	protein_coding	501.143	-0.287035	0.10834	-0.214062	0.113966	-2.64938	0.00806387	0.139972	544.228	538.675	567.451	551.162	443.329	467.021	439.798	457.477
RPS18	ENSG00000231500	6222	ribosomal protein S18 [Source:HGNC Symbol;Acc:HGNC:10401]	protein_coding	24874	0.324467	0.12256	0.23735	0.132244	2.64742	0.00811091	0.140517	19061	19302.7	25656	24327.4	31384.2	27994.7	25971.1	25294.5
SP6	ENSG00000189120	80320	Sp6 transcription factor [Source:HGNC Symbol;Acc:HGNC:14530]	protein_coding	15.6121	-3.62843	1.37065	-0.0183171	0.114454	-2.64723	0.0081155	0.140517	4.72215	20.5786	11.6043	77.114	4.00599	5.91166	0.960257	0
ESD	ENSG00000139684	2098	esterase D [Source:HGNC Symbol;Acc:HGNC:3465]	protein_coding	2438.63	0.353108	0.13343	0.252442	0.146828	2.64639	0.00813563	0.14069	1938.44	1780.65	2587.76	2254.57	2913.69	2861.24	2560.04	2612.65
CAPZA2	ENSG00000198898	830	capping actin protein of muscle Z-line subunit alpha 2 [Source:HGNC Symbol;Acc:HGNC:1490]	protein_coding	898.935	0.392805	0.148489	0.271564	0.168259	2.64534	0.00816077	0.140949	664.642	794.092	866.842	776.822	1017.52	1200.07	853.668	1017.82
GLO1	ENSG00000124767	2739	glyoxalase I [Source:HGNC Symbol;Acc:HGNC:4323]	protein_coding	4535.67	0.349431	0.132119	0.250952	0.145032	2.64482	0.00817347	0.140992	3425.92	3635.15	4895.86	3996.94	5640.43	5178.62	4433.51	5078.97
VMP1	ENSG00000062716	81671	vacuole membrane protein 1 [Source:HGNC Symbol;Acc:HGNC:29559]	protein_coding	1259.08	0.25169	0.0952791	0.196018	0.0982227	2.64161	0.00825127	0.142158	1257.27	1090.67	1109.37	1142.5	1466.19	1333.08	1287.7	1385.83
MYO3A	ENSG00000095777	53904	myosin IIIA [Source:HGNC Symbol;Acc:HGNC:7601]	protein_coding	148.282	1.09935	0.416235	0.0976346	0.178992	2.64117	0.00826212	0.142168	95.6235	49.6308	142.733	90.9133	289.766	112.322	193.012	212.258
ZFAND1	ENSG00000104231	79752	zinc finger AN1-type containing 1 [Source:HGNC Symbol;Acc:HGNC:25858]	protein_coding	844.744	0.688964	0.261151	0.38732	0.395501	2.63818	0.00833519	0.143248	603.255	702.094	661.446	620.565	1530.29	969.513	592.479	1078.31
EPN2	ENSG00000072134	22905	epsin 2 [Source:HGNC Symbol;Acc:HGNC:18639]	protein_coding	565.06	-0.693126	0.262797	-0.384399	0.40331	-2.6375	0.008352	0.143359	408.466	999.878	655.644	729.336	475.377	407.905	424.434	419.444
RANBP1	ENSG00000099901	5902	RAN binding protein 1 [Source:HGNC Symbol;Acc:HGNC:9847]	protein_coding	4117.08	0.298571	0.113263	0.222295	0.120187	2.63609	0.00838682	0.143779	3560.5	3108.58	3952.43	4137.37	4867.27	4779.58	4444.07	4086.87
SDE2	ENSG00000143751	163859	SDE2 telomere maintenance homolog [Source:HGNC Symbol;Acc:HGNC:26643]	protein_coding	1018.03	-0.378866	0.143761	-0.262392	0.161163	-2.63539	0.00840404	0.143896	1318.66	1194.77	903.976	1189.18	910.694	818.765	938.171	870.039
FAM102A	ENSG00000167106	399665	family with sequence similarity 102 member A [Source:HGNC Symbol;Acc:HGNC:31419]	protein_coding	92.5	-0.7045	0.267379	-0.390721	0.410218	-2.63484	0.00841771	0.143952	108.609	117.419	121.845	114.453	76.1137	50.2491	77.7808	73.5295
POLR2K	ENSG00000147669	5440	RNA polymerase II, I and III subunit K [Source:HGNC Symbol;Acc:HGNC:9198]	protein_coding	969.291	0.361066	0.137138	0.255032	0.151828	2.63286	0.00846702	0.144617	705.961	863.091	931.826	892.899	1256.54	1025.67	1035.16	1043.18
HIF1AN	ENSG00000166135	55662	hypoxia inducible factor 1 subunit alpha inhibitor [Source:HGNC Symbol;Acc:HGNC:17113]	protein_coding	991.808	-0.695056	0.264067	-0.370537	0.417858	-2.63212	0.00848534	0.144752	1199.43	1358.19	1044.39	1309.72	644.964	464.065	1187.84	725.878
DYNLL1	ENSG00000088986	8655	dynein light chain LC8-type 1 [Source:HGNC Symbol;Acc:HGNC:15476]	protein_coding	2378.27	0.333822	0.126893	0.240809	0.137883	2.63074	0.0085199	0.145163	1943.16	1747.97	2554.11	2168.93	2714.72	2713.45	2599.42	2584.4
POLR3A	ENSG00000148606	11128	RNA polymerase III subunit A [Source:HGNC Symbol;Acc:HGNC:30074]	protein_coding	1076.59	-0.480712	0.183028	-0.29948	0.223512	-2.62645	0.00862817	0.146575	1319.84	1440.5	953.874	1304.85	1136.36	789.207	789.331	878.732
TBC1D32	ENSG00000146350	221322	TBC1 domain family member 32 [Source:HGNC Symbol;Acc:HGNC:21485]	protein_coding	159.035	-2.07924	0.791662	-0.0373436	0.121061	-2.62643	0.00862868	0.146575	36.5967	280.837	403.83	303.991	9.3473	147.792	51.8539	38.0325
ZNF548	ENSG00000188785	147694	zinc finger protein 548 [Source:HGNC Symbol;Acc:HGNC:26561]	protein_coding	106.155	-1.45749	0.554983	-0.0608226	0.135976	-2.6262	0.00863447	0.146575	119.234	185.207	155.498	157.475	46.7365	121.189	15.3641	48.5367
CRTC3	ENSG00000140577	64784	CREB regulated transcription coactivator 3 [Source:HGNC Symbol;Acc:HGNC:26148]	protein_coding	580.879	-0.372174	0.141748	-0.257889	0.158226	-2.62561	0.00864945	0.146649	682.35	705.725	562.809	671.297	574.191	481.8	462.844	506.014
ASAP3	ENSG00000088280	55616	ArfGAP with SH3 domain, ankyrin repeat and PH domain 3 [Source:HGNC Symbol;Acc:HGNC:14987]	protein_coding	250.616	-0.671485	0.255785	-0.377725	0.380457	-2.62519	0.00866013	0.146651	308.12	330.468	280.824	318.197	241.695	112.322	222.78	190.525
EML4	ENSG00000143924	27436	EMAP like 4 [Source:HGNC Symbol;Acc:HGNC:1316]	protein_coding	841.822	-0.467447	0.178101	-0.302601	0.214625	-2.62463	0.00867442	0.146714	819.293	1271.03	805.339	1011.41	651.64	730.09	749.961	695.814
ORC6	ENSG00000091651	23594	origin recognition complex subunit 6 [Source:HGNC Symbol;Acc:HGNC:17151]	protein_coding	604.604	-0.564392	0.215314	-0.331834	0.286961	-2.62125	0.0087608	0.147994	942.069	612.516	573.253	753.688	551.491	543.873	382.182	477.761
DMAC1	ENSG00000137038	90871	distal membrane arm assembly complex 1 [Source:HGNC Symbol;Acc:HGNC:30536]	protein_coding	612.131	0.469171	0.179139	0.303815	0.216246	2.61903	0.0088181	0.148112	446.243	413.993	663.767	529.245	702.383	703.488	749	688.932
DRC3	ENSG00000171962	83450	dynein regulatory complex subunit 3 [Source:HGNC Symbol;Acc:HGNC:25384]	protein_coding	45.3212	-4.04153	1.54286	-0.0143	0.113659	-2.6195	0.00880576	0.148112	1.18054	194.892	4.64172	141.24	1.33533	2.95583	16.3244	0
H2AZ1	ENSG00000164032	3015	H2A.Z variant histone 1 [Source:HGNC Symbol;Acc:HGNC:4741]	protein_coding	6629.26	0.300295	0.114594	0.222318	0.12178	2.62052	0.00877965	0.148112	5331.31	5233.02	6761.83	6431.71	8064.05	7673.34	6723.72	6815.07
HAL	ENSG00000084110	3034	histidine ammonia-lyase [Source:HGNC Symbol;Acc:HGNC:4806]	protein_coding	7.79703	5.71441	2.18177	0.00911528	0.112894	2.61916	0.00881458	0.148112	0	0	1.16043	0	29.3772	5.91166	25.9269	0
NAXD	ENSG00000213995	55739	NAD(P)HX dehydratase [Source:HGNC Symbol;Acc:HGNC:25576]	protein_coding	305.622	-0.500015	0.190925	-0.315505	0.236637	-2.61891	0.00882118	0.148112	308.12	381.309	385.263	360.001	311.132	218.731	224.7	255.723
HTRA3	ENSG00000170801	94031	HtrA serine peptidase 3 [Source:HGNC Symbol;Acc:HGNC:30406]	protein_coding	61.0171	-4.29123	1.63885	-0.0127554	0.113398	-2.61844	0.00883339	0.148138	1.18054	1.21051	306.354	155.446	20.0299	2.95583	0.960257	0
KAT5	ENSG00000172977	10524	lysine acetyltransferase 5 [Source:HGNC Symbol;Acc:HGNC:5275]	protein_coding	542.31	0.382134	0.145978	0.26404	0.164193	2.61774	0.00885134	0.14826	512.353	505.992	399.188	470.801	660.988	532.05	639.531	617.576
PGAP1	ENSG00000197121	80055	post-GPI attachment to proteins inositol deacylase 1 [Source:HGNC Symbol;Acc:HGNC:25712]	protein_coding	338.315	-0.662033	0.252944	-0.370387	0.375653	-2.61731	0.00886266	0.148271	492.284	324.416	416.595	431.027	305.79	162.571	313.044	260.794
TTBK2	ENSG00000128881	146057	tau tubulin kinase 2 [Source:HGNC Symbol;Acc:HGNC:19141]	protein_coding	472.739	0.419046	0.160133	0.280511	0.185814	2.61687	0.00887397	0.148281	371.869	403.099	450.247	389.223	455.347	641.415	511.817	558.897
STAT6	ENSG00000166888	6778	signal transducer and activator of transcription 6 [Source:HGNC Symbol;Acc:HGNC:11368]	protein_coding	530.617	0.442862	0.169302	0.292463	0.199954	2.61581	0.0089017	0.148565	538.325	351.047	459.531	451.32	674.341	573.431	584.796	612.142
BEX2	ENSG00000133134	84707	brain expressed X-linked 2 [Source:HGNC Symbol;Acc:HGNC:30933]	protein_coding	946.875	0.558469	0.21359	0.337699	0.281093	2.61467	0.00893133	0.148834	1014.08	664.568	644.039	742.323	1454.17	999.071	888.238	1168.5
SUSD6	ENSG00000100647	9766	sushi domain containing 6 [Source:HGNC Symbol;Acc:HGNC:19956]	protein_coding	214.74	-0.623812	0.238609	-0.357248	0.33833	-2.61437	0.00893928	0.148834	275.065	318.363	185.669	265.029	178.934	144.836	183.409	166.619
CCDC167	ENSG00000198937	154467	coiled-coil domain containing 167 [Source:HGNC Symbol;Acc:HGNC:21239]	protein_coding	332.043	0.60299	0.230842	0.352236	0.319292	2.61214	0.0089978	0.149629	223.122	197.313	358.573	275.581	436.653	369.479	416.752	378.876
SAR1B	ENSG00000152700	51128	secretion associated Ras related GTPase 1B [Source:HGNC Symbol;Acc:HGNC:10535]	protein_coding	1130.14	0.498485	0.190997	0.314188	0.237348	2.60991	0.00905647	0.150424	799.224	1283.14	755.441	907.51	1225.83	1507.47	1192.64	1369.9
LARS2	ENSG00000011376	23395	leucyl-tRNA synthetase 2, mitochondrial [Source:HGNC Symbol;Acc:HGNC:17095]	protein_coding	789.131	-0.778987	0.298571	-0.373129	0.619602	-2.60905	0.00907944	0.150445	1027.07	1307.35	575.574	1082.84	769.149	351.744	652.014	547.306
POLR2G	ENSG00000168002	5436	RNA polymerase II subunit G [Source:HGNC Symbol;Acc:HGNC:9194]	protein_coding	1199.95	0.358027	0.137223	0.251076	0.15189	2.60909	0.00907835	0.150445	874.778	1011.98	1132.58	1180.66	1275.24	1439.49	1473.99	1210.88
EIF4G3	ENSG00000075151	8672	eukaryotic translation initiation factor 4 gamma 3 [Source:HGNC Symbol;Acc:HGNC:3298]	protein_coding	1270.77	-0.324261	0.124412	-0.233413	0.13436	-2.60635	0.00915124	0.151454	1339.91	1646.29	1217.29	1450.15	1225.83	1070.01	1098.53	1118.16
MED25	ENSG00000104973	81857	mediator complex subunit 25 [Source:HGNC Symbol;Acc:HGNC:28845]	protein_coding	527.962	-0.911094	0.349786	-0.132395	0.249391	-2.60472	0.00919504	0.151998	705.961	979.3	312.156	757.746	240.359	452.242	439.798	336.135
FMNL2	ENSG00000157827	114793	formin like 2 [Source:HGNC Symbol;Acc:HGNC:18267]	protein_coding	578.444	-0.635978	0.244264	-0.351472	0.358993	-2.60365	0.00922363	0.151998	829.918	731.146	516.392	740.294	327.156	419.728	626.088	436.831
HK1	ENSG00000156515	3098	hexokinase 1 [Source:HGNC Symbol;Acc:HGNC:4922]	protein_coding	1719.87	-0.338348	0.129959	-0.239743	0.141907	-2.60349	0.00922793	0.151998	2231.22	1700.76	1759.21	1980.61	1414.11	1767.59	1410.62	1494.86
NUDT3	ENSG00000272325	11165	nudix hydrolase 3 [Source:HGNC Symbol;Acc:HGNC:8050]	protein_coding	328.51	-0.743051	0.285356	-0.366512	0.531572	-2.60394	0.00921581	0.151998	481.659	255.417	482.739	424.939	328.491	230.555	183.409	240.873
USP31	ENSG00000103404	57478	ubiquitin specific peptidase 31 [Source:HGNC Symbol;Acc:HGNC:20060]	protein_coding	240.107	-1.52168	0.584937	-0.0564963	0.132629	-2.60145	0.00928319	0.152727	264.44	151.313	602.264	404.645	214.988	153.703	28.8077	100.696
ARHGEF7	ENSG00000102606	8874	Rho guanine nucleotide exchange factor 7 [Source:HGNC Symbol;Acc:HGNC:15607]	protein_coding	595.075	0.354098	0.136222	0.247849	0.15062	2.59941	0.00933843	0.153453	546.589	492.676	517.552	524.781	599.563	798.074	620.326	661.041
UGGT1	ENSG00000136731	56886	UDP-glucose glycoprotein glucosyltransferase 1 [Source:HGNC Symbol;Acc:HGNC:15663]	protein_coding	1059.21	-0.522905	0.201295	-0.319237	0.256896	-2.59771	0.00938489	0.154034	1221.86	1189.93	1300.84	1291.46	1159.07	564.564	891.118	854.826
CRCP	ENSG00000241258	27297	CGRP receptor component [Source:HGNC Symbol;Acc:HGNC:17888]	protein_coding	355.569	-0.823188	0.317071	-0.184639	0.473215	-2.59622	0.00942551	0.154518	443.882	360.731	525.675	479.324	225.671	416.772	146.919	245.581
OPRD1	ENSG00000116329	4985	opioid receptor delta 1 [Source:HGNC Symbol;Acc:HGNC:8153]	protein_coding	27.6982	1.71301	0.659952	0.0490066	0.127402	2.59565	0.00944113	0.154591	9.4443	20.5786	9.28345	11.77	34.7185	76.8516	17.2846	41.6547
HEYL	ENSG00000163909	26508	hes related family bHLH transcription factor with YRPW motif like [Source:HGNC Symbol;Acc:HGNC:4882]	protein_coding	116.857	-1.5568	0.600119	-0.0545494	0.13117	-2.59415	0.00948245	0.154939	225.483	128.314	147.375	196.438	132.198	41.3816	14.4039	49.2612
SNU13	ENSG00000100138	4809	small nuclear ribonucleoprotein 13 [Source:HGNC Symbol;Acc:HGNC:7819]	protein_coding	1917.39	0.390546	0.150553	0.266434	0.171111	2.59407	0.00948468	0.154939	1351.72	1471.98	1878.74	1926.63	2350.18	2343.97	2132.73	1883.15
ATP5F1C	ENSG00000165629	509	ATP synthase F1 subunit gamma [Source:HGNC Symbol;Acc:HGNC:833]	protein_coding	3803.56	0.333358	0.128543	0.237584	0.139861	2.59336	0.00950423	0.155076	2907.66	2935.48	4118.37	3500.16	4612.23	4217.97	4038.84	4097.73
CHAF1B	ENSG00000159259	8208	chromatin assembly factor 1 subunit B [Source:HGNC Symbol;Acc:HGNC:1911]	protein_coding	712.205	-0.507761	0.196343	-0.310506	0.248031	-2.5861	0.0097069	0.158196	1011.72	617.358	856.398	862.865	713.066	487.712	564.631	583.89
TTK	ENSG00000112742	7272	TTK protein kinase [Source:HGNC Symbol;Acc:HGNC:12401]	protein_coding	1060.75	0.466625	0.180513	0.295845	0.219256	2.58499	0.00973819	0.158334	824.015	755.356	1098.93	883.97	1512.93	1197.11	975.621	1238.05
ZNF829	ENSG00000185869	374899	zinc finger protein 829 [Source:HGNC Symbol;Acc:HGNC:34032]	protein_coding	103.374	1.26983	0.491206	0.0720248	0.146014	2.58513	0.00973436	0.158334	68.4712	100.472	18.5669	54.7915	138.874	177.35	112.35	156.114
ZSCAN12	ENSG00000158691	9753	zinc finger and SCAN domain containing 12 [Source:HGNC Symbol;Acc:HGNC:13172]	protein_coding	452.521	-0.514971	0.199287	-0.312242	0.253824	-2.58406	0.00976437	0.158574	449.785	673.042	460.691	547.103	315.138	369.479	436.917	368.01
BRF2	ENSG00000104221	55290	BRF2 RNA polymerase III transcription initiation factor subunit [Source:HGNC Symbol;Acc:HGNC:17298]	protein_coding	294.528	0.534006	0.206756	0.319023	0.269407	2.58278	0.00980079	0.158727	223.122	220.312	272.701	243.518	407.275	384.258	263.11	341.93
CITED1	ENSG00000125931	4435	Cbp/p300 interacting transactivator with Glu/Asp rich carboxy-terminal domain 1 [Source:HGNC Symbol;Acc:HGNC:1986]	protein_coding	18.158	2.41237	0.934114	0.0311007	0.118351	2.58252	0.00980816	0.158727	12.9859	0	6.96259	3.2469	17.3593	41.3816	30.7282	32.5993
SLC25A45	ENSG00000162241	283130	solute carrier family 25 member 45 [Source:HGNC Symbol;Acc:HGNC:27442]	protein_coding	49.0643	1.32278	0.512172	0.0687934	0.14287	2.58269	0.0098034	0.158727	9.4443	41.1572	34.8129	26.787	56.0838	73.8958	79.7013	70.6318
NREP	ENSG00000134986	9315	neuronal regeneration related protein [Source:HGNC Symbol;Acc:HGNC:16834]	protein_coding	239.378	-1.75461	0.679854	-0.0454309	0.125263	-2.58086	0.00985547	0.159307	613.879	22.9996	410.793	428.591	132.198	124.145	105.628	76.7895
CERCAM	ENSG00000167123	51148	cerebral endothelial cell adhesion molecule [Source:HGNC Symbol;Acc:HGNC:23723]	protein_coding	725.145	-0.876122	0.339761	-0.138799	0.265242	-2.57864	0.00991893	0.159412	1584.28	486.624	648.681	1036.17	623.599	440.419	507.976	473.414
CLSTN1	ENSG00000171603	22883	calsyntenin 1 [Source:HGNC Symbol;Acc:HGNC:17447]	protein_coding	995.091	-0.299848	0.116277	-0.225525	0.124051	-2.57875	0.00991585	0.159412	1095.54	979.3	1201.05	1108.01	831.91	1004.98	843.106	896.843
LURAP1	ENSG00000171357	541468	leucine rich adaptor protein 1 [Source:HGNC Symbol;Acc:HGNC:32327]	protein_coding	9.79247	-4.17903	1.62023	-0.0145316	0.113671	-2.57928	0.00990057	0.159412	48.402	2.42101	1.16043	21.1049	1.33533	2.95583	0.960257	0
POLR2E	ENSG00000099817	5434	RNA polymerase II, I and III subunit E [Source:HGNC Symbol;Acc:HGNC:9192]	protein_coding	1145.17	0.417928	0.162074	0.276404	0.188622	2.57863	0.00991944	0.159412	832.279	837.67	1103.57	1144.53	1351.35	1268.05	1494.16	1129.75
TTC32	ENSG00000183891	130502	tetratricopeptide repeat domain 32 [Source:HGNC Symbol;Acc:HGNC:32954]	protein_coding	95.3473	1.26882	0.491892	0.0718268	0.145795	2.57948	0.00989504	0.159412	50.7631	59.3148	61.5028	51.9505	217.659	138.924	43.2116	139.453
SLC2A11	ENSG00000133460	66035	solute carrier family 2 member 11 [Source:HGNC Symbol;Acc:HGNC:14239]	protein_coding	121.212	-0.638773	0.247857	-0.34466	0.372361	-2.57718	0.00996093	0.159894	122.776	145.261	178.706	145.705	102.82	82.7633	93.1449	98.5223
USP11	ENSG00000102226	8237	ubiquitin specific peptidase 11 [Source:HGNC Symbol;Acc:HGNC:12609]	protein_coding	2210.21	-0.239427	0.0929613	-0.185782	0.0951375	-2.57555	0.010008	0.160463	2655.03	2331.44	2122.43	2460.34	1957.59	2074.99	2073.19	2006.67
CRKL	ENSG00000099942	1399	CRK like proto-oncogene, adaptor protein [Source:HGNC Symbol;Acc:HGNC:2363]	protein_coding	2247.73	-0.159108	0.0619387	-0.135426	0.0610749	-2.5688	0.0102051	0.163434	2291.42	2445.22	2358	2397.43	2167.24	2054.3	2139.45	2128.73
B3GAT3	ENSG00000149541	26229	beta-1,3-glucuronyltransferase 3 [Source:HGNC Symbol;Acc:HGNC:923]	protein_coding	455.329	0.343208	0.133638	0.239995	0.146507	2.5682	0.0102229	0.163531	448.604	398.257	356.252	404.645	531.461	478.845	515.658	508.911
DGKE	ENSG00000153933	8526	diacylglycerol kinase epsilon [Source:HGNC Symbol;Acc:HGNC:2852]	protein_coding	329.83	0.90135	0.351219	0.127471	0.235406	2.56635	0.0102775	0.164025	161.734	190.049	349.29	216.731	419.293	617.769	240.064	443.713
GTF2H5	ENSG00000272047	404672	general transcription factor IIH subunit 5 [Source:HGNC Symbol;Acc:HGNC:21157]	protein_coding	629.514	0.431269	0.168033	0.279077	0.198045	2.56658	0.0102706	0.164025	471.034	498.729	634.756	543.451	859.952	597.078	718.272	712.838
ATP5PD	ENSG00000167863	10476	ATP synthase peripheral stalk subunit d [Source:HGNC Symbol;Acc:HGNC:845]	protein_coding	2670.65	0.400302	0.15603	0.271043	0.179162	2.56555	0.0103012	0.164027	1946.71	1882.34	2873.23	2505.8	3445.15	2887.85	3020.97	2803.18
CNOT2	ENSG00000111596	4848	CCR4-NOT transcription complex subunit 2 [Source:HGNC Symbol;Acc:HGNC:7878]	protein_coding	753.789	-0.426863	0.166381	-0.276181	0.195319	-2.56558	0.0103005	0.164027	858.251	708.146	1020.02	877.476	737.102	523.182	657.776	648.364
PCTP	ENSG00000141179	58488	phosphatidylcholine transfer protein [Source:HGNC Symbol;Acc:HGNC:8752]	protein_coding	393.947	0.582858	0.2275	0.326306	0.319229	2.56201	0.0104068	0.165401	402.563	233.628	314.477	308.862	367.215	567.52	476.287	481.021
RPL10	ENSG00000147403	6134	ribosomal protein L10 [Source:HGNC Symbol;Acc:HGNC:10298]	protein_coding	28438.7	0.344835	0.134604	0.233908	0.147748	2.56186	0.0104114	0.165401	19940.5	22740.6	28540.8	28995.7	35127.2	31597.8	32962.7	27604.4
H2BC13	ENSG00000185130	8340	H2B clustered histone 13 [Source:HGNC Symbol;Acc:HGNC:4748]	protein_coding	6.44538	4.59578	1.79482	0.0135196	0.113509	2.56059	0.0104495	0.165628	0	1.21051	1.16043	0	20.0299	0	9.60257	19.5596
PSMC1	ENSG00000100764	5700	proteasome 26S subunit, ATPase 1 [Source:HGNC Symbol;Acc:HGNC:9547]	protein_coding	1522.39	0.316508	0.123596	0.226148	0.133048	2.56082	0.0104426	0.165628	1122.69	1393.29	1538.73	1364.11	1697.2	1835.57	1547.93	1679.59
IGSF8	ENSG00000162729	93185	immunoglobulin superfamily member 8 [Source:HGNC Symbol;Acc:HGNC:17813]	protein_coding	350.692	-0.789213	0.30845	-0.190554	0.482088	-2.55864	0.0105082	0.166368	596.171	469.676	235.568	477.295	327.156	203.952	251.587	244.133
CENPJ	ENSG00000151849	55835	centromere protein J [Source:HGNC Symbol;Acc:HGNC:17272]	protein_coding	471.601	0.557044	0.217799	0.31921	0.294769	2.5576	0.0105396	0.166675	495.826	263.89	393.386	376.235	584.874	475.889	602.081	580.63
AMH	ENSG00000104899	268	anti-Mullerian hormone [Source:HGNC Symbol;Acc:HGNC:464]	protein_coding	168.236	-0.862729	0.3376	-0.140158	0.267875	-2.55548	0.0106041	0.16729	198.33	291.732	152.016	228.501	174.928	79.8074	104.668	115.909
PAOX	ENSG00000148832	196743	polyamine oxidase [Source:HGNC Symbol;Acc:HGNC:20837]	protein_coding	8.28384	4.27351	1.67216	0.0144692	0.113676	2.55568	0.010598	0.16729	1.18054	2.42101	0	0	25.3712	5.91166	0.960257	30.426
RUNX3	ENSG00000020633	864	RUNX family transcription factor 3 [Source:HGNC Symbol;Acc:HGNC:10473]	protein_coding	152.049	1.35886	0.531815	0.0635346	0.138103	2.55513	0.0106147	0.16729	110.97	54.4728	104.439	73.0553	112.168	88.6749	434.996	237.613
COX7A2	ENSG00000112695	1347	cytochrome c oxidase subunit 7A2 [Source:HGNC Symbol;Acc:HGNC:2288]	protein_coding	1955.37	0.386572	0.1514	0.258018	0.172151	2.55332	0.0106702	0.167783	1431.99	1444.13	1936.76	1959.51	2487.72	2308.5	2148.09	1926.26
TCEAL4	ENSG00000133142	79921	transcription elongation factor A like 4 [Source:HGNC Symbol;Acc:HGNC:26121]	protein_coding	1346.98	0.378219	0.148108	0.254648	0.167187	2.55367	0.0106595	0.167783	1102.62	950.247	1458.66	1175.79	1450.17	1460.18	1658.36	1519.85
ERP29	ENSG00000089248	10961	endoplasmic reticulum protein 29 [Source:HGNC Symbol;Acc:HGNC:13799]	protein_coding	1785.03	-0.27421	0.107421	-0.202259	0.112135	-2.55266	0.0106903	0.167908	2063.58	2014.28	1724.4	2007.8	1757.29	1684.82	1428.86	1599.18
FAM86B2	ENSG00000145002	653333	family with sequence similarity 86 member B2 [Source:HGNC Symbol;Acc:HGNC:32222]	protein_coding	47.119	1.57636	0.617787	0.0521756	0.129418	2.55162	0.0107225	0.168224	47.2215	20.5786	6.96259	19.8873	42.7305	91.6308	75.8603	72.0807
OSER1	ENSG00000132823	51526	oxidative stress responsive serine rich 1 [Source:HGNC Symbol;Acc:HGNC:16105]	protein_coding	621.331	0.446542	0.175067	0.280312	0.210045	2.55069	0.010751	0.168481	434.438	456.361	682.333	530.463	701.048	712.355	745.159	708.492
B4GALNT3	ENSG00000139044	283358	beta-1,4-N-acetyl-galactosaminyltransferase 3 [Source:HGNC Symbol;Acc:HGNC:24137]	protein_coding	287.621	-0.649761	0.254837	-0.326406	0.412229	-2.54972	0.0107811	0.168762	419.091	325.626	291.268	368.524	148.221	245.334	282.316	220.589
SPATA17	ENSG00000162814	128153	spermatogenesis associated 17 [Source:HGNC Symbol;Acc:HGNC:25184]	protein_coding	62.5369	1.71406	0.672386	0.0462255	0.125674	2.54922	0.0107965	0.168812	23.6107	9.68405	59.182	23.9459	33.3832	165.527	83.5424	101.42
VPS26A	ENSG00000122958	9559	VPS26, retromer complex component A [Source:HGNC Symbol;Acc:HGNC:12711]	protein_coding	808.924	0.510087	0.200365	0.301742	0.257816	2.54579	0.0109032	0.170288	637.49	605.253	768.205	655.469	1136.36	1067.06	642.412	959.144
HACL1	ENSG00000131373	26061	2-hydroxyacyl-CoA lyase 1 [Source:HGNC Symbol;Acc:HGNC:17856]	protein_coding	424.717	0.382746	0.150424	0.255177	0.170506	2.54445	0.010945	0.170749	356.522	369.204	370.178	378.67	572.856	452.242	428.275	469.792
HPF1	ENSG00000056050	54969	histone PARylation factor 1 [Source:HGNC Symbol;Acc:HGNC:26051]	protein_coding	459.489	0.663828	0.260984	0.326844	0.438969	2.54356	0.0109731	0.170995	378.952	269.943	429.36	348.636	616.922	339.921	711.55	580.63
PNMA1	ENSG00000176903	9240	PNMA family member 1 [Source:HGNC Symbol;Acc:HGNC:9158]	protein_coding	876.38	-0.396233	0.155888	-0.259768	0.178722	-2.54178	0.0110291	0.171674	1193.52	853.407	915.58	1025.62	710.395	682.797	882.476	747.248
BET1	ENSG00000105829	10282	Bet1 golgi vesicular membrane trafficking protein [Source:HGNC Symbol;Acc:HGNC:14562]	protein_coding	411.376	0.460204	0.181182	0.284755	0.220659	2.54001	0.011085	0.17205	303.398	337.731	393.386	351.883	590.215	422.684	421.553	470.154
CALM2	ENSG00000143933	805	calmodulin 2 [Source:HGNC Symbol;Acc:HGNC:1445]	protein_coding	5047.32	0.393342	0.154869	0.264983	0.177197	2.53984	0.0110904	0.17205	3743.48	3675.1	5722.09	4310.67	6186.58	6059.45	4894.43	5786.74
GULP1	ENSG00000144366	51454	GULP PTB domain containing engulfment adaptor 1 [Source:HGNC Symbol;Acc:HGNC:18649]	protein_coding	132.311	0.721828	0.284197	0.306056	0.624956	2.53989	0.0110889	0.17205	92.0819	71.4199	134.61	102.277	185.611	138.924	170.926	162.634
ADAMTS20	ENSG00000173157	80070	ADAM metallopeptidase with thrombospondin type 1 motif 20 [Source:HGNC Symbol;Acc:HGNC:17178]	protein_coding	39.6094	4.07473	1.60485	0.0132359	0.113468	2.539	0.0111169	0.172269	2.36107	14.5261	1.16043	0	1.33533	159.615	0.960257	136.917
ELF4	ENSG00000102034	2000	E74 like ETS transcription factor 4 [Source:HGNC Symbol;Acc:HGNC:3319]	protein_coding	566.084	-0.729827	0.287689	-0.27813	0.716786	-2.53686	0.011185	0.172745	776.793	852.196	440.964	760.181	488.73	257.157	550.227	402.42
SIM2	ENSG00000159263	6493	SIM bHLH transcription factor 2 [Source:HGNC Symbol;Acc:HGNC:10883]	protein_coding	182.452	-1.32914	0.523858	-0.0639214	0.138322	-2.53721	0.0111739	0.172745	383.675	238.47	125.327	299.121	184.275	29.5583	107.549	91.6403
ZNF624	ENSG00000197566	57547	zinc finger protein 624 [Source:HGNC Symbol;Acc:HGNC:29254]	protein_coding	42.6391	-1.71331	0.675358	-0.0465393	0.125842	-2.53689	0.0111842	0.172745	31.8745	64.1568	96.3158	70.6202	38.7245	2.95583	20.1654	16.2997
RPLP1	ENSG00000137818	6176	ribosomal protein lateral stalk subunit P1 [Source:HGNC Symbol;Acc:HGNC:10372]	protein_coding	22967.8	0.259624	0.102359	0.201945	0.106084	2.5364	0.0111999	0.172783	18567.5	19221.6	22376.6	23452.8	24770.3	25180.7	27696.7	22476.1
CDKL5	ENSG00000008086	6792	cyclin dependent kinase like 5 [Source:HGNC Symbol;Acc:HGNC:11411]	protein_coding	103.271	1.4147	0.557985	0.0589256	0.134279	2.53538	0.0112326	0.172791	92.0819	65.3673	19.7273	48.7036	245.701	118.233	70.0988	166.256
MRPL36	ENSG00000171421	64979	mitochondrial ribosomal protein L36 [Source:HGNC Symbol;Acc:HGNC:14490]	protein_coding	573.053	0.405079	0.15983	0.263189	0.184811	2.53444	0.0112626	0.172791	463.951	493.887	497.825	518.693	817.221	552.74	614.564	625.544
NDUFB1	ENSG00000183648	4707	NADH:ubiquinone oxidoreductase subunit B1 [Source:HGNC Symbol;Acc:HGNC:7695]	protein_coding	1025.97	0.392345	0.154805	0.258051	0.177041	2.53444	0.0112628	0.172791	962.138	734.777	970.12	887.622	1364.71	945.866	1171.51	1171.04
RREB1	ENSG00000124782	6239	ras responsive element binding protein 1 [Source:HGNC Symbol;Acc:HGNC:10449]	protein_coding	492.654	-0.278529	0.109881	-0.205162	0.115122	-2.53482	0.0112505	0.172791	556.033	538.675	524.515	543.856	435.317	431.551	459.963	451.319
SLC24A1	ENSG00000074621	9187	solute carrier family 24 member 1 [Source:HGNC Symbol;Acc:HGNC:10975]	protein_coding	178.251	-0.939527	0.370657	-0.111725	0.200953	-2.53476	0.0112524	0.172791	267.982	292.943	127.647	252.041	130.862	70.9399	168.045	115.546
FOXO3B	ENSG00000240445	2310	forkhead box O3B [Source:HGNC Symbol;Acc:HGNC:3822]	protein_coding	271.347	-0.853817	0.337113	-0.134839	0.251283	-2.53273	0.0113177	0.17287	289.232	434.572	299.391	373.8	305.79	174.394	108.509	185.092
GRIK4	ENSG00000149403	2900	glutamate ionotropic receptor kainate type subunit 4 [Source:HGNC Symbol;Acc:HGNC:4582]	protein_coding	12.4696	-4.12935	1.62995	-0.0143166	0.113651	-2.53342	0.0112955	0.17287	34.2356	2.42101	2.32086	55.6032	1.33533	0	3.84103	0
SNRPF	ENSG00000139343	6636	small nuclear ribonucleoprotein polypeptide F [Source:HGNC Symbol;Acc:HGNC:11162]	protein_coding	1473.5	0.338784	0.133721	0.234534	0.146375	2.53352	0.0112923	0.17287	1207.69	1139.09	1546.85	1315.81	1834.74	1442.45	1664.13	1637.21
ZZEF1	ENSG00000074755	23140	zinc finger ZZ-type and EF-hand domain containing 1 [Source:HGNC Symbol;Acc:HGNC:29027]	protein_coding	673.628	-0.545544	0.215394	-0.306902	0.290965	-2.53277	0.0113164	0.17287	846.445	933.3	589.499	834.454	650.305	390.17	614.564	530.282
HROB	ENSG00000125319	78995	homologous recombination factor with OB-fold [Source:HGNC Symbol;Acc:HGNC:28460]	protein_coding	261.301	-0.669298	0.264631	-0.308651	0.473156	-2.52917	0.0114332	0.174249	207.775	424.888	319.119	331.59	170.922	206.908	228.541	200.667
USP34	ENSG00000115464	9736	ubiquitin specific peptidase 34 [Source:HGNC Symbol;Acc:HGNC:20066]	protein_coding	1163.34	-0.527492	0.208536	-0.301853	0.276117	-2.5295	0.0114225	0.174249	1690.53	1442.92	903.976	1457.45	801.197	951.778	1141.75	917.127
DMAP1	ENSG00000178028	55929	DNA methyltransferase 1 associated protein 1 [Source:HGNC Symbol;Acc:HGNC:18291]	protein_coding	456.508	-0.8357	0.330781	-0.140393	0.266	-2.52645	0.0115223	0.175247	487.562	848.565	363.215	635.987	212.317	487.712	312.084	304.622
STBD1	ENSG00000118804	8987	starch binding domain 1 [Source:HGNC Symbol;Acc:HGNC:24854]	protein_coding	8.94153	5.00802	1.98228	0.0108514	0.113107	2.5264	0.0115239	0.175247	0	1.21051	1.16043	0	2.67066	47.2933	0	19.1974
ATP5MJ	ENSG00000156411	9556	ATP synthase membrane subunit j [Source:HGNC Symbol;Acc:HGNC:1188]	protein_coding	2153.72	0.369317	0.146273	0.247857	0.164347	2.52484	0.011575	0.175638	1590.18	1668.08	2362.64	1896.19	2709.38	2406.05	2193.23	2404.02
POMZP3	ENSG00000146707	22932	POM121 and ZP3 fusion [Source:HGNC Symbol;Acc:HGNC:9203]	protein_coding	64.3233	-1.95739	0.775182	-0.0379554	0.121265	-2.52508	0.0115673	0.175638	220.76	52.0518	15.0856	121.759	44.0659	14.7792	26.8872	19.1974
KIAA1958	ENSG00000165185	158405	KIAA1958 [Source:HGNC Symbol;Acc:HGNC:23427]	protein_coding	283.029	1.80857	0.716899	0.0415573	0.123068	2.52277	0.0116436	0.176487	38.9577	124.682	257.616	81.1726	60.0898	925.175	275.594	500.943
SRGAP1	ENSG00000196935	57522	SLIT-ROBO Rho GTPase activating protein 1 [Source:HGNC Symbol;Acc:HGNC:17382]	protein_coding	158.08	-1.02884	0.407938	-0.0909068	0.167323	-2.52205	0.0116673	0.176652	270.343	198.523	146.214	228.095	96.1437	177.35	50.8936	97.0735
MAN2C1	ENSG00000140400	4123	mannosidase alpha class 2C member 1 [Source:HGNC Symbol;Acc:HGNC:6827]	protein_coding	636.215	-0.462752	0.183596	-0.284941	0.225277	-2.52049	0.0117191	0.17705	840.542	790.461	548.884	768.705	451.341	558.652	605.922	525.211
ZNF124	ENSG00000196418	7678	zinc finger protein 124 [Source:HGNC Symbol;Acc:HGNC:12907]	protein_coding	54.8969	-1.08116	0.428919	-0.0872233	0.16273	-2.52067	0.0117132	0.17705	48.402	71.4199	104.439	76.3022	38.7245	20.6908	42.2513	36.9459
LSG1	ENSG00000041802	55341	large 60S subunit nuclear export GTPase 1 [Source:HGNC Symbol;Acc:HGNC:25652]	protein_coding	397.26	-0.611375	0.242809	-0.308467	0.372689	-2.51792	0.0118049	0.178153	412.007	481.782	534.959	495.153	223	277.848	443.639	309.693
PITRM1	ENSG00000107959	10531	pitrilysin metallopeptidase 1 [Source:HGNC Symbol;Acc:HGNC:17663]	protein_coding	1439.71	-0.249074	0.0990159	-0.189439	0.101914	-2.5155	0.0118864	0.178846	1668.1	1399.35	1604.88	1584.08	1224.5	1303.52	1420.22	1313.03
PRKD2	ENSG00000105287	25865	protein kinase D2 [Source:HGNC Symbol;Acc:HGNC:17293]	protein_coding	310.021	-0.637793	0.253529	-0.300082	0.423631	-2.51566	0.011881	0.178846	352.981	389.783	370.178	390.44	267.066	322.186	148.84	238.699
SREK1IP1	ENSG00000153006	285672	SREK1 interacting protein 1 [Source:HGNC Symbol;Acc:HGNC:26716]	protein_coding	1006.41	0.44668	0.177605	0.274355	0.214816	2.51502	0.0119025	0.178846	787.418	709.357	1064.12	841.354	973.455	1421.75	1083.17	1170.68
VILL	ENSG00000136059	50853	villin like [Source:HGNC Symbol;Acc:HGNC:30906]	protein_coding	17.5753	2.40389	0.955715	0.0296142	0.11776	2.51528	0.0118938	0.178846	2.36107	14.5261	2.32086	3.65277	58.7545	8.86749	18.2449	31.8749
DECR1	ENSG00000104325	1666	2,4-dienoyl-CoA reductase 1 [Source:HGNC Symbol;Acc:HGNC:2753]	protein_coding	276.528	-0.799733	0.318086	-0.152454	0.299406	-2.5142	0.0119302	0.179069	224.302	470.887	328.402	377.858	243.03	248.29	126.754	192.698
BCHE	ENSG00000114200	590	butyrylcholinesterase [Source:HGNC Symbol;Acc:HGNC:983]	protein_coding	178.987	0.67403	0.268307	0.295804	0.504044	2.51216	0.0119995	0.179152	133.401	140.419	140.412	137.993	309.796	189.173	162.283	218.415
METTL1	ENSG00000037897	4234	methyltransferase like 1 [Source:HGNC Symbol;Acc:HGNC:7030]	protein_coding	165.367	-0.656596	0.261311	-0.30491	0.452228	-2.5127	0.0119813	0.179152	212.497	171.892	227.444	202.526	142.88	82.7633	156.522	126.413
RAP1GDS1	ENSG00000138698	5910	Rap1 GTPase-GDP dissociation stimulator 1 [Source:HGNC Symbol;Acc:HGNC:9859]	protein_coding	358.026	0.672085	0.267456	0.298608	0.496653	2.51288	0.011975	0.179152	225.483	261.469	350.45	271.117	518.108	263.069	527.181	447.335
TMEM101	ENSG00000091947	84336	transmembrane protein 101 [Source:HGNC Symbol;Acc:HGNC:28653]	protein_coding	682.736	0.377979	0.150456	0.250462	0.17045	2.51222	0.0119975	0.179152	499.367	630.674	644.039	599.46	883.988	777.384	661.617	765.359
ZBTB2	ENSG00000181472	57621	zinc finger and BTB domain containing 2 [Source:HGNC Symbol;Acc:HGNC:20868]	protein_coding	306.458	-0.501502	0.199632	-0.289672	0.256655	-2.51214	0.0120003	0.179152	362.425	395.836	312.156	367.712	320.479	224.643	214.137	254.275
MLX	ENSG00000108788	6945	MAX dimerization protein MLX [Source:HGNC Symbol;Acc:HGNC:11645]	protein_coding	897.236	-0.63796	0.253997	-0.303542	0.422252	-2.51168	0.0120158	0.17919	842.904	1543.4	820.425	1164.42	949.419	585.255	600.161	671.908
ZNF396	ENSG00000186496	252884	zinc finger protein 396 [Source:HGNC Symbol;Acc:HGNC:18824]	protein_coding	29.1922	-3.78358	1.50745	-0.0148012	0.113735	-2.50993	0.0120755	0.179888	1.18054	110.156	2.32086	103.901	5.34132	2.95583	7.68206	0
RPLP0	ENSG00000089157	6175	ribosomal protein lateral stalk subunit P0 [Source:HGNC Symbol;Acc:HGNC:10371]	protein_coding	31500.4	0.257765	0.102757	0.194808	0.106407	2.50848	0.0121252	0.180433	23820.9	28508.6	30961.5	31472.6	36788.3	35827.6	33078.9	31544.5
FZD9	ENSG00000188763	8326	frizzled class receptor 9 [Source:HGNC Symbol;Acc:HGNC:4047]	protein_coding	128.937	0.853122	0.340346	0.1291	0.235792	2.50663	0.0121887	0.181185	55.4852	130.735	85.8719	93.7544	173.593	206.908	128.674	156.477
SOCS1	ENSG00000185338	8651	suppressor of cytokine signaling 1 [Source:HGNC Symbol;Acc:HGNC:19383]	protein_coding	6.87552	6.3696	2.54174	0.00668786	0.112655	2.506	0.0122107	0.181317	0	0	0	0	28.0419	2.95583	24.0064	0
CFAP298	ENSG00000159079	56683	cilia and flagella associated protein 298 [Source:HGNC Symbol;Acc:HGNC:1301]	protein_coding	250.05	-0.478247	0.191116	-0.281189	0.239302	-2.5024	0.0123356	0.182975	293.954	317.153	259.937	296.28	252.377	177.35	191.091	212.258
CAND2	ENSG00000144712	23066	cullin associated and neddylation dissociated 2 (putative) [Source:HGNC Symbol;Acc:HGNC:30689]	protein_coding	432.393	-0.772054	0.308801	-0.165953	0.344362	-2.50016	0.0124136	0.183937	330.55	804.987	458.37	586.066	224.335	369.479	382.182	303.174
ACSS1	ENSG00000154930	84532	acyl-CoA synthetase short chain family member 1 [Source:HGNC Symbol;Acc:HGNC:16091]	protein_coding	585.843	-0.472086	0.188949	-0.277817	0.235654	-2.49849	0.0124724	0.18461	499.367	848.565	677.692	697.679	540.808	478.845	455.162	488.627
CCDC50	ENSG00000152492	152137	coiled-coil domain containing 50 [Source:HGNC Symbol;Acc:HGNC:18111]	protein_coding	401.378	-0.628543	0.251635	-0.289766	0.418099	-2.49784	0.0124954	0.184753	551.311	428.519	454.889	508.952	361.874	404.949	193.012	307.52
ZNF561	ENSG00000171469	93134	zinc finger protein 561 [Source:HGNC Symbol;Acc:HGNC:28684]	protein_coding	312.047	0.848667	0.340082	0.128064	0.233222	2.49548	0.0125788	0.185788	306.94	162.208	214.68	207.802	201.635	443.375	534.863	424.878
ACOX3	ENSG00000087008	8310	acyl-CoA oxidase 3, pristanoyl [Source:HGNC Symbol;Acc:HGNC:121]	protein_coding	163.941	0.82954	0.332986	0.134087	0.246891	2.49122	0.0127307	0.187762	115.693	117.419	124.166	116.077	331.162	153.703	139.237	214.069
RPS8	ENSG00000142937	6202	ribosomal protein S8 [Source:HGNC Symbol;Acc:HGNC:10441]	protein_coding	19891.7	0.250985	0.100758	0.193844	0.10382	2.49097	0.0127395	0.187762	16861.6	16320	20422.4	19049.6	23771.5	22591.4	19330.9	20786
FAM131C	ENSG00000185519	348487	family with sequence similarity 131 member C [Source:HGNC Symbol;Acc:HGNC:26717]	protein_coding	79.49	-0.906272	0.364091	-0.112127	0.200184	-2.48914	0.0128054	0.188333	74.3738	130.735	106.76	105.93	60.0898	32.5141	70.0988	55.4188
GLDC	ENSG00000178445	2731	glycine decarboxylase [Source:HGNC Symbol;Acc:HGNC:4313]	protein_coding	306.364	0.779564	0.313171	0.156069	0.308189	2.48926	0.0128008	0.188333	226.663	261.469	199.594	215.919	612.916	286.716	247.746	399.885
DGAT2	ENSG00000062282	84649	diacylglycerol O-acyltransferase 2 [Source:HGNC Symbol;Acc:HGNC:16940]	protein_coding	48.1598	-2.41502	0.971127	-0.0273576	0.116949	-2.48682	0.012889	0.189362	199.511	18.1576	10.4439	94.1602	17.3593	32.5141	4.80128	8.33093
TRIM54	ENSG00000138100	57159	tripartite motif containing 54 [Source:HGNC Symbol;Acc:HGNC:16008]	protein_coding	11.8295	-3.54026	1.42428	-0.0171626	0.11418	-2.48565	0.0129316	0.189787	22.4302	1.21051	17.4065	45.4567	1.33533	2.95583	3.84103	0
NUP88	ENSG00000108559	4927	nucleoporin 88 [Source:HGNC Symbol;Acc:HGNC:8067]	protein_coding	671.167	0.496112	0.199842	0.280863	0.258082	2.48252	0.0130455	0.191256	695.336	382.52	603.424	544.668	717.072	869.014	755.722	801.581
LRRC57	ENSG00000180979	255252	leucine rich repeat containing 57 [Source:HGNC Symbol;Acc:HGNC:26719]	protein_coding	137.126	-0.758676	0.305853	-0.161509	0.320993	-2.48052	0.013119	0.192082	169.997	127.103	210.038	179.797	121.515	118.233	68.1782	102.144
RPL23	ENSG00000125691	9349	ribosomal protein L23 [Source:HGNC Symbol;Acc:HGNC:10316]	protein_coding	17862.6	0.330303	0.133174	0.225648	0.145142	2.48023	0.0131296	0.192082	13775.7	13181.2	20268.1	16079.5	20883.2	20259.3	18850.8	19603.4
CKAP2	ENSG00000136108	26586	cytoskeleton associated protein 2 [Source:HGNC Symbol;Acc:HGNC:1990]	protein_coding	2279.44	0.324287	0.130858	0.224703	0.142103	2.47815	0.0132065	0.192892	1969.14	1671.71	2429.94	2021.2	2358.19	2816.91	2427.53	2540.93
LRP3	ENSG00000130881	4037	LDL receptor related protein 3 [Source:HGNC Symbol;Acc:HGNC:6695]	protein_coding	697.086	0.355495	0.143462	0.23581	0.159512	2.47798	0.0132128	0.192892	593.81	510.834	699.74	643.293	833.245	712.355	832.543	750.871
MORN1	ENSG00000116151	79906	MORN repeat containing 1 [Source:HGNC Symbol;Acc:HGNC:25852]	protein_coding	104.039	0.935225	0.377577	0.102818	0.184177	2.47691	0.0132524	0.193267	70.8322	47.2097	98.6366	69.8084	201.635	103.454	105.628	135.106
APH1A	ENSG00000117362	51107	aph-1 homolog A, gamma-secretase subunit [Source:HGNC Symbol;Acc:HGNC:29509]	protein_coding	2067.02	0.28107	0.113567	0.202335	0.119201	2.47492	0.0133266	0.193948	1697.61	1907.76	1747.61	2106.43	2286.08	2231.65	2530.28	2028.76
PPP1R14C	ENSG00000198729	81706	protein phosphatase 1 regulatory inhibitor subunit 14C [Source:HGNC Symbol;Acc:HGNC:14952]	protein_coding	165.17	-0.668699	0.270192	-0.240236	0.501638	-2.47491	0.013327	0.193948	208.955	199.734	190.311	206.584	86.7964	183.262	120.032	125.688
TBCA	ENSG00000171530	6902	tubulin folding cofactor A [Source:HGNC Symbol;Acc:HGNC:11579]	protein_coding	2757.08	0.386208	0.156139	0.25084	0.17881	2.47349	0.01338	0.194311	1846.36	2238.23	3109.96	2364.15	2921.7	3366.69	3056.5	3153.08
VPS35L	ENSG00000103544	57020	VPS35 endosomal protein sorting factor like [Source:HGNC Symbol;Acc:HGNC:24641]	protein_coding	477.373	-0.436499	0.176447	-0.263192	0.211964	-2.47383	0.0133675	0.194311	494.645	532.623	620.831	554.409	487.395	310.362	411.95	406.767
CHST8	ENSG00000124302	64377	carbohydrate sulfotransferase 8 [Source:HGNC Symbol;Acc:HGNC:15993]	protein_coding	45.8803	-2.21556	0.896019	-0.030303	0.117967	-2.47267	0.0134109	0.194464	12.9859	43.5782	157.819	84.4195	6.67664	44.3375	6.7218	10.5042
RBM15	ENSG00000162775	64783	RNA binding motif protein 15 [Source:HGNC Symbol;Acc:HGNC:14959]	protein_coding	425.105	-1.23695	0.500291	-0.0654665	0.139367	-2.47246	0.0134186	0.194464	991.651	174.313	532.638	684.285	168.251	467.021	174.767	207.911
RPA3	ENSG00000106399	6119	replication protein A3 [Source:HGNC Symbol;Acc:HGNC:10291]	protein_coding	1158.23	0.372548	0.150735	0.241455	0.170354	2.47155	0.0134529	0.194758	788.599	985.352	1250.94	1011.82	1276.57	1350.81	1299.23	1302.52
IBA57	ENSG00000181873	200205	iron-sulfur cluster assembly factor IBA57 [Source:HGNC Symbol;Acc:HGNC:27302]	protein_coding	377.647	-0.504793	0.204324	-0.277644	0.267744	-2.47055	0.0134906	0.1951	491.103	401.888	422.397	457.002	405.94	286.716	243.905	312.229
PABPC1L	ENSG00000101104	80336	poly(A) binding protein cytoplasmic 1 like [Source:HGNC Symbol;Acc:HGNC:15797]	protein_coding	307.934	-0.859767	0.348147	-0.117086	0.20846	-2.46955	0.0135283	0.195442	224.302	549.57	394.547	423.315	291.102	124.145	249.667	206.824
SLC25A13	ENSG00000004864	10165	solute carrier family 25 member 13 [Source:HGNC Symbol;Acc:HGNC:10983]	protein_coding	473.433	-0.449553	0.182091	-0.264321	0.22287	-2.46885	0.013555	0.195623	629.226	464.834	524.515	561.714	321.814	487.712	401.387	396.263
ADK	ENSG00000156110	132	adenosine kinase [Source:HGNC Symbol;Acc:HGNC:257]	protein_coding	753.661	0.277696	0.112533	0.200382	0.11796	2.4677	0.0135985	0.195641	701.239	689.989	616.189	709.449	774.491	916.308	822.94	798.683
EP400	ENSG00000183495	57634	E1A binding protein p400 [Source:HGNC Symbol;Acc:HGNC:11958]	protein_coding	1093.74	-0.359233	0.145545	-0.23217	0.162401	-2.46819	0.0135797	0.195641	1310.4	1363.03	961.997	1276.44	861.287	1055.23	985.224	936.324
SLC25A32	ENSG00000164933	81034	solute carrier family 25 member 32 [Source:HGNC Symbol;Acc:HGNC:29683]	protein_coding	43.1807	-2.09804	0.850152	-0.0333164	0.119174	-2.46784	0.0135932	0.195641	14.1664	145.261	40.6151	81.1726	21.3653	2.95583	29.768	10.142
ATP6V1F	ENSG00000128524	9296	ATPase H+ transporting V1 subunit F [Source:HGNC Symbol;Acc:HGNC:16832]	protein_coding	2334.49	0.386591	0.156705	0.245777	0.179436	2.46699	0.0136255	0.195825	1672.82	1701.97	2377.72	2337.77	2936.39	2544.97	2804.91	2299.34
LFNG	ENSG00000106003	3955	LFNG O-fucosylpeptide 3-beta-N-acetylglucosaminyltransferase [Source:HGNC Symbol;Acc:HGNC:6560]	protein_coding	11.8096	3.96817	1.61034	0.0143201	0.113652	2.46418	0.0137325	0.19716	0	0	0	4.87036	10.6826	44.3375	31.6885	2.89772
CLCN3	ENSG00000109572	1182	chloride voltage-gated channel 3 [Source:HGNC Symbol;Acc:HGNC:2021]	protein_coding	1039	-0.239795	0.0973422	-0.181007	0.0993964	-2.46342	0.0137617	0.197375	1169.91	1062.82	1134.9	1140.48	914.7	886.749	1041.88	960.593
FGFBP3	ENSG00000174721	143282	fibroblast growth factor binding protein 3 [Source:HGNC Symbol;Acc:HGNC:23428]	protein_coding	41.6271	-2.515	1.02139	-0.025204	0.116237	-2.46232	0.0138041	0.197574	144.026	16.9471	32.4921	86.4488	4.00599	41.3816	1.92051	5.79543
RPS2	ENSG00000140988	6187	ribosomal protein S2 [Source:HGNC Symbol;Acc:HGNC:10404]	protein_coding	78596.4	0.267592	0.108668	0.194415	0.112978	2.46248	0.013798	0.197574	63561.3	69760.3	68546.7	83431.6	86057.9	89115.3	94638.1	73659.9
DEXI	ENSG00000182108	28955	Dexi homolog [Source:HGNC Symbol;Acc:HGNC:13267]	protein_coding	226.189	-1.02233	0.415312	-0.0860179	0.160572	-2.46159	0.0138323	0.197671	293.954	246.943	342.327	329.967	281.754	103.454	72.0193	139.09
SEC22A	ENSG00000121542	26984	SEC22 homolog A, vesicle trafficking protein [Source:HGNC Symbol;Acc:HGNC:20260]	protein_coding	178.766	-2.48306	1.0088	-0.0255316	0.116366	-2.46141	0.0138394	0.197671	754.363	58.1043	26.6899	372.988	134.868	59.1166	4.80128	19.1974
C16orf91	ENSG00000174109	283951	chromosome 16 open reading frame 91 [Source:HGNC Symbol;Acc:HGNC:27558]	protein_coding	164.323	1.17598	0.478339	0.0702974	0.143727	2.45846	0.0139534	0.199094	106.248	156.155	53.3798	89.6957	236.353	82.7633	338.971	251.015
BRD8	ENSG00000112983	10902	bromodomain containing 8 [Source:HGNC Symbol;Acc:HGNC:19874]	protein_coding	1083.1	0.675809	0.274964	0.223693	0.489525	2.45781	0.0139788	0.199252	796.863	504.781	1247.46	784.939	956.095	1675.96	1303.07	1395.61
WDR54	ENSG00000005448	84058	WD repeat domain 54 [Source:HGNC Symbol;Acc:HGNC:25770]	protein_coding	448.627	0.437493	0.178126	0.259783	0.215194	2.45608	0.0140462	0.200007	297.495	366.783	444.445	411.951	475.377	561.608	552.148	479.21
IFI44L	ENSG00000137959	10964	interferon induced protein 44 like [Source:HGNC Symbol;Acc:HGNC:17817]	protein_coding	25.5996	-1.71818	0.699888	-0.0441413	0.124363	-2.45494	0.0140909	0.200438	48.402	53.2623	24.3691	33.2808	6.67664	2.95583	22.0859	13.7642
OTUB1	ENSG00000167770	55611	OTU deubiquitinase, ubiquitin aldehyde binding 1 [Source:HGNC Symbol;Acc:HGNC:23077]	protein_coding	753.593	0.326662	0.133117	0.220988	0.14461	2.45395	0.0141297	0.200578	572.561	780.777	635.916	685.909	886.658	803.986	839.265	823.676
PRSS22	ENSG00000005001	64063	serine protease 22 [Source:HGNC Symbol;Acc:HGNC:14368]	protein_coding	5.82717	6.11692	2.49247	0.00696541	0.112679	2.45416	0.0141213	0.200578	0	0	0	0	17.3593	17.735	11.5231	0
CD109	ENSG00000156535	135228	CD109 molecule [Source:HGNC Symbol;Acc:HGNC:21685]	protein_coding	246.833	0.492372	0.200835	0.270514	0.260095	2.45162	0.0142214	0.201593	236.107	154.945	220.482	206.99	269.736	316.274	286.157	283.976
RPS11	ENSG00000142534	6205	ribosomal protein S11 [Source:HGNC Symbol;Acc:HGNC:10384]	protein_coding	15381.5	0.31242	0.127446	0.215254	0.137017	2.4514	0.0142303	0.201593	11590.5	12032.4	15517.3	15742.2	18965.7	17084.7	17202	14917.4
RPL12	ENSG00000197958	6136	ribosomal protein L12 [Source:HGNC Symbol;Acc:HGNC:10302]	protein_coding	23099.3	0.295797	0.120717	0.207568	0.128114	2.45033	0.0142726	0.201987	17042.2	18995.3	24012.8	22899.2	27796.2	26383.7	24452.9	23211.8
DHRS2	ENSG00000100867	10202	dehydrogenase/reductase 2 [Source:HGNC Symbol;Acc:HGNC:18349]	protein_coding	32.2947	2.13587	0.871962	0.0321721	0.118702	2.4495	0.0143053	0.202243	9.4443	6.05253	23.2086	9.74071	81.4551	2.95583	72.9795	52.5211
NUB1	ENSG00000013374	51667	negative regulator of ubiquitin like proteins 1 [Source:HGNC Symbol;Acc:HGNC:17623]	protein_coding	978.904	-0.272333	0.111229	-0.196284	0.115914	-2.4484	0.0143492	0.202245	1010.54	1044.67	1156.95	1081.22	869.299	786.251	986.184	896.119
PTBP2	ENSG00000117569	58155	polypyrimidine tract binding protein 2 [Source:HGNC Symbol;Acc:HGNC:17662]	protein_coding	338.342	-0.636418	0.259868	-0.250205	0.449625	-2.449	0.0143253	0.202245	376.591	458.782	385.263	429.809	391.251	183.262	219.899	261.881
YWHAH	ENSG00000128245	7533	tyrosine 3-monooxygenase/tryptophan 5-monooxygenase activation protein eta [Source:HGNC Symbol;Acc:HGNC:12853]	protein_coding	1868.43	-0.180473	0.0737094	-0.146405	0.0730103	-2.44845	0.0143474	0.202245	2026.98	2051.81	1840.44	2022.01	1809.37	1717.34	1736.14	1743.34
DUSP15	ENSG00000149599	128853	dual specificity phosphatase 15 [Source:HGNC Symbol;Acc:HGNC:16236]	protein_coding	51.4281	1.33914	0.547744	0.0586255	0.133751	2.44484	0.0144918	0.203997	12.9859	26.6311	25.5295	49.1094	76.1137	97.5424	82.5821	40.9302
HP1BP3	ENSG00000127483	50809	heterochromatin protein 1 binding protein 3 [Source:HGNC Symbol;Acc:HGNC:24973]	protein_coding	1565.06	0.253529	0.103712	0.186683	0.106845	2.44456	0.014503	0.203997	1329.28	1636.6	1296.2	1446.9	1638.45	1761.68	1716.94	1694.44
SRSF4	ENSG00000116350	6429	serine and arginine rich splicing factor 4 [Source:HGNC Symbol;Acc:HGNC:10786]	protein_coding	2083.99	-0.165188	0.0676457	-0.13668	0.0666825	-2.44195	0.0146081	0.205268	2080.11	2298.75	2207.14	2228.19	1929.55	1950.85	2009.82	1967.55
DARS2	ENSG00000117593	55157	aspartyl-tRNA synthetase 2, mitochondrial [Source:HGNC Symbol;Acc:HGNC:25538]	protein_coding	2248.28	-0.180867	0.0741112	-0.146099	0.0733548	-2.44048	0.0146677	0.205897	2541.7	2279.38	2359.16	2388.1	2165.9	1959.72	2151.94	2140.33
MRPL22	ENSG00000082515	29093	mitochondrial ribosomal protein L22 [Source:HGNC Symbol;Acc:HGNC:14480]	protein_coding	703.539	0.45069	0.184739	0.260086	0.226911	2.4396	0.0147034	0.205983	471.034	605.253	712.505	594.589	879.982	626.636	916.085	822.227
PSENEN	ENSG00000205155	55851	presenilin enhancer, gamma-secretase subunit [Source:HGNC Symbol;Acc:HGNC:30100]	protein_coding	325.325	0.584806	0.239785	0.265704	0.36856	2.43887	0.0147332	0.205983	227.844	257.838	298.231	258.129	540.808	334.009	296.719	389.018
PSMB1	ENSG00000008018	5689	proteasome 20S subunit beta 1 [Source:HGNC Symbol;Acc:HGNC:9537]	protein_coding	2380.14	0.313793	0.128646	0.214627	0.138391	2.4392	0.0147199	0.205983	2026.98	1836.34	2455.47	2174.21	3063.24	2311.46	2585.01	2588.38
TFPI2	ENSG00000105825	7980	tissue factor pathway inhibitor 2 [Source:HGNC Symbol;Acc:HGNC:11761]	protein_coding	30.9202	-2.33145	0.95582	-0.0278282	0.117072	-2.43921	0.0147194	0.205983	95.6235	42.3677	4.64172	61.6912	2.67066	23.6466	10.5628	6.15765
COG2	ENSG00000135775	22796	component of oligomeric golgi complex 2 [Source:HGNC Symbol;Acc:HGNC:6546]	protein_coding	910.194	0.500892	0.205664	0.267691	0.270829	2.43549	0.0148717	0.206519	642.212	562.885	1067.6	743.541	1053.57	1004.98	1124.46	1082.3
EFCAB2	ENSG00000203666	84288	EF-hand calcium binding domain 2 [Source:HGNC Symbol;Acc:HGNC:28166]	protein_coding	96.1533	1.05446	0.433014	0.0801459	0.153541	2.43518	0.0148846	0.206519	36.5967	78.6829	75.428	60.0677	206.976	91.6308	85.4629	134.382
MLXIP	ENSG00000175727	22877	MLX interacting protein [Source:HGNC Symbol;Acc:HGNC:17055]	protein_coding	873.769	-0.25493	0.104662	-0.187371	0.107921	-2.43574	0.0148612	0.206519	934.985	876.407	1033.94	957.025	738.437	815.809	828.702	804.841
MTMR1	ENSG00000063601	8776	myotubularin related protein 1 [Source:HGNC Symbol;Acc:HGNC:7449]	protein_coding	781.165	-0.600935	0.246685	-0.24569	0.389977	-2.43605	0.0148488	0.206519	1174.63	662.147	926.024	995.176	482.054	886.749	528.141	594.394
NDUFB3	ENSG00000119013	4709	NADH:ubiquinone oxidoreductase subunit B3 [Source:HGNC Symbol;Acc:HGNC:7698]	protein_coding	665.698	0.439185	0.180263	0.256513	0.218609	2.43636	0.0148358	0.206519	474.576	482.992	653.323	648.163	871.97	691.664	830.622	672.27
NDUFC1	ENSG00000109390	4717	NADH:ubiquinone oxidoreductase subunit C1 [Source:HGNC Symbol;Acc:HGNC:7705]	protein_coding	784.711	0.495092	0.20326	0.266686	0.265241	2.43575	0.0148608	0.206519	495.826	568.938	899.334	643.293	878.646	839.456	1030.36	921.836
PRMT3	ENSG00000185238	10196	protein arginine methyltransferase 3 [Source:HGNC Symbol;Acc:HGNC:30163]	protein_coding	533.85	-0.37567	0.154277	-0.23586	0.175401	-2.43503	0.0148907	0.206519	598.532	570.148	619.67	613.259	431.311	579.343	395.626	462.91
PTGIS	ENSG00000124212	5740	prostaglandin I2 synthase [Source:HGNC Symbol;Acc:HGNC:9603]	protein_coding	34.7466	-2.99325	1.22803	-0.0197795	0.114774	-2.43745	0.0147913	0.206519	27.1524	10.8946	133.45	75.8964	1.33533	2.95583	25.9269	0.362214
NUP37	ENSG00000075188	79023	nucleoporin 37 [Source:HGNC Symbol;Acc:HGNC:29929]	protein_coding	888.084	0.547896	0.225127	0.268171	0.321216	2.43372	0.0149444	0.207057	624.504	554.412	1003.77	705.796	1319.3	836.5	987.144	1073.24
NOC4L	ENSG00000184967	79050	nucleolar complex associated 4 homolog [Source:HGNC Symbol;Acc:HGNC:28461]	protein_coding	294.564	0.540532	0.222167	0.267736	0.312494	2.433	0.0149743	0.207222	166.456	246.943	305.193	241.083	371.221	348.788	334.169	342.655
TMEM150C	ENSG00000249242	441027	transmembrane protein 150C [Source:HGNC Symbol;Acc:HGNC:37263]	protein_coding	51.4073	-3.97051	1.63237	-0.0125155	0.113345	-2.43235	0.0150012	0.207222	243.191	1.21051	1.16043	141.24	1.33533	2.95583	20.1654	0
YBX2	ENSG00000006047	51087	Y-box binding protein 2 [Source:HGNC Symbol;Acc:HGNC:17948]	protein_coding	18.3966	-1.85107	0.760945	-0.0395681	0.121932	-2.43259	0.0149914	0.207222	17.7081	41.1572	27.8503	30.0339	12.018	0	11.5231	6.88208
GPS2	ENSG00000132522	2874	G protein pathway suppressor 2 [Source:HGNC Symbol;Acc:HGNC:4550]	protein_coding	34.6478	-3.63677	1.49608	-0.014363	0.113637	-2.43086	0.0150629	0.207868	2.36107	15.7366	84.7115	151.387	1.33533	20.6908	0.960257	0
CCL5	ENSG00000271503	6352	C-C motif chemokine ligand 5 [Source:HGNC Symbol;Acc:HGNC:10632]	protein_coding	3.75648	4.63234	1.9073	0.0117881	0.113216	2.42874	0.0151515	0.208883	0	1.21051	0	0	10.6826	8.86749	0.960257	8.33093
SLC2A1	ENSG00000117394	6513	solute carrier family 2 member 1 [Source:HGNC Symbol;Acc:HGNC:11005]	protein_coding	249.386	-0.759659	0.312893	-0.137953	0.248732	-2.42786	0.0151883	0.208975	197.15	381.309	348.129	326.314	251.042	189.173	121.953	180.021
SYNJ2	ENSG00000078269	8871	synaptojanin 2 [Source:HGNC Symbol;Acc:HGNC:11504]	protein_coding	221.367	-1.42148	0.585403	-0.0523523	0.129269	-2.4282	0.0151739	0.208975	242.01	531.412	140.412	377.858	228.341	26.6025	128.674	95.6246
FAT4	ENSG00000196159	79633	FAT atypical cadherin 4 [Source:HGNC Symbol;Acc:HGNC:23109]	protein_coding	93.5073	-1.23276	0.508172	-0.0634293	0.137444	-2.42588	0.0152714	0.209495	214.858	110.156	53.3798	146.517	88.1317	44.3375	40.3308	50.3478
MIX23	ENSG00000160124	131076	mitochondrial matrix import factor 23 [Source:HGNC Symbol;Acc:HGNC:31136]	protein_coding	877.672	0.546736	0.225354	0.264264	0.321851	2.42613	0.0152609	0.209495	641.032	550.78	968.96	691.185	1251.2	1102.52	754.762	1060.93
SMIM19	ENSG00000176209	114926	small integral membrane protein 19 [Source:HGNC Symbol;Acc:HGNC:25166]	protein_coding	475.522	0.465393	0.19182	0.259403	0.240571	2.42619	0.0152583	0.209495	380.133	309.89	507.108	402.21	626.269	493.624	535.823	549.117
DYNC1I1	ENSG00000158560	1780	dynein cytoplasmic 1 intermediate chain 1 [Source:HGNC Symbol;Acc:HGNC:2963]	protein_coding	28.4932	1.95821	0.807408	0.0353594	0.119988	2.42531	0.0152953	0.209586	5.90269	14.5261	17.4065	9.33485	8.01197	32.5141	90.2642	49.9856
TCEAL3	ENSG00000196507	85012	transcription elongation factor A like 3 [Source:HGNC Symbol;Acc:HGNC:28247]	protein_coding	46.0878	-1.15696	0.477097	-0.06916	0.142307	-2.425	0.0153083	0.209586	72.0128	31.4732	87.0323	62.5029	24.0359	38.4258	24.9667	28.2527
IL20RB	ENSG00000174564	53833	interleukin 20 receptor subunit beta [Source:HGNC Symbol;Acc:HGNC:6004]	protein_coding	9.42303	4.47309	1.84573	0.0116678	0.113215	2.42348	0.0153727	0.209846	0	0	3.48129	0	36.0539	5.91166	0.960257	28.9772
PDZD4	ENSG00000067840	57595	PDZ domain containing 4 [Source:HGNC Symbol;Acc:HGNC:21167]	protein_coding	208.999	0.47957	0.197881	0.259605	0.253453	2.42353	0.0153704	0.209846	158.192	192.471	167.102	176.956	205.641	292.627	241.024	237.975
RBP5	ENSG00000139194	83758	retinol binding protein 5 [Source:HGNC Symbol;Acc:HGNC:15847]	protein_coding	17.3155	-3.89809	1.60804	-0.0135635	0.113506	-2.42412	0.0153457	0.209846	89.7208	1.21051	1.16043	37.3394	1.33533	2.95583	4.80128	0
CABP1	ENSG00000157782	9478	calcium binding protein 1 [Source:HGNC Symbol;Acc:HGNC:1384]	protein_coding	26.4092	-3.71336	1.53279	-0.0139591	0.113564	-2.42261	0.0154094	0.210141	10.6248	107.735	1.16043	74.6788	1.33533	14.7792	0.960257	0
ABCC1	ENSG00000103222	4363	ATP binding cassette subfamily C member 1 [Source:HGNC Symbol;Acc:HGNC:51]	protein_coding	721.768	-0.492355	0.203399	-0.259293	0.265234	-2.42064	0.0154934	0.211045	936.166	1002.3	547.723	886.811	572.856	635.504	613.604	579.181
PLEKHO1	ENSG00000023902	51177	pleckstrin homology domain containing O1 [Source:HGNC Symbol;Acc:HGNC:24310]	protein_coding	231.871	-1.35508	0.559872	-0.0549213	0.130965	-2.42034	0.0155061	0.211045	514.714	98.051	333.044	383.946	49.4072	245.334	125.794	104.68
KDM4C	ENSG00000107077	23081	lysine demethylase 4C [Source:HGNC Symbol;Acc:HGNC:17071]	protein_coding	211.861	-0.716971	0.296314	-0.157492	0.296191	-2.41963	0.0155362	0.211247	362.425	153.734	261.097	274.769	149.557	180.306	156.522	156.477
HVCN1	ENSG00000122986	84329	hydrogen voltage gated channel 1 [Source:HGNC Symbol;Acc:HGNC:28240]	protein_coding	16.6582	-3.97499	1.64387	-0.0132236	0.113454	-2.41807	0.015603	0.211947	1.18054	42.3677	2.32086	79.5492	4.00599	0	3.84103	0
SLC27A5	ENSG00000083807	10998	solute carrier family 27 member 5 [Source:HGNC Symbol;Acc:HGNC:10999]	protein_coding	121.732	0.819002	0.339079	0.116892	0.205695	2.41537	0.0157192	0.213108	100.346	45.9992	119.524	86.4488	152.227	153.703	164.204	151.406
TLCD1	ENSG00000160606	116238	TLC domain containing 1 [Source:HGNC Symbol;Acc:HGNC:25177]	protein_coding	176.599	0.960328	0.397544	0.0898283	0.164796	2.41565	0.0157069	0.213108	139.303	61.7358	168.263	112.424	245.701	127.101	313.044	245.219
CCDC102A	ENSG00000135736	92922	coiled-coil domain containing 102A [Source:HGNC Symbol;Acc:HGNC:28097]	protein_coding	239.45	0.42368	0.175463	0.247904	0.20952	2.41464	0.0157506	0.213117	175.9	216.681	198.434	223.631	280.419	286.716	281.355	252.464
ZNF511	ENSG00000198546	118472	zinc finger protein 511 [Source:HGNC Symbol;Acc:HGNC:28445]	protein_coding	286.608	-0.389377	0.161243	-0.238002	0.185492	-2.41484	0.0157422	0.213117	280.968	344.994	350.45	324.69	231.012	248.29	259.269	253.188
MTX3	ENSG00000177034	345778	metaxin 3 [Source:HGNC Symbol;Acc:HGNC:24812]	protein_coding	588.52	-0.302117	0.125198	-0.207002	0.13334	-2.41311	0.0158172	0.21381	717.767	605.253	621.991	658.716	504.754	493.624	579.035	527.022
UBL3	ENSG00000122042	5412	ubiquitin like 3 [Source:HGNC Symbol;Acc:HGNC:12504]	protein_coding	349.409	0.608839	0.252583	0.237891	0.403419	2.41045	0.0159327	0.215161	244.371	238.47	355.092	273.146	405.94	289.671	557.909	430.673
DLAT	ENSG00000150768	1737	dihydrolipoamide S-acetyltransferase [Source:HGNC Symbol;Acc:HGNC:2896]	protein_coding	1078.2	-0.332826	0.138155	-0.218204	0.150896	-2.40908	0.0159927	0.215762	1417.83	969.616	1195.24	1225.71	1013.51	925.175	932.409	946.104
CATSPERG	ENSG00000099338	57828	cation channel sperm associated auxiliary subunit gamma [Source:HGNC Symbol;Acc:HGNC:25243]	protein_coding	23.2592	-4.0468	1.68268	-0.0123293	0.113313	-2.40498	0.0161735	0.217989	72.0128	2.42101	18.5669	82.3902	10.6826	0	0	0
PPP3CA	ENSG00000138814	5530	protein phosphatase 3 catalytic subunit alpha [Source:HGNC Symbol;Acc:HGNC:9314]	protein_coding	435.539	-0.726352	0.302074	-0.149476	0.275486	-2.40455	0.0161922	0.218029	628.046	427.309	541.921	579.978	295.108	186.217	512.777	312.953
ERH	ENSG00000100632	2079	ERH mRNA splicing and mitosis factor [Source:HGNC Symbol;Acc:HGNC:3447]	protein_coding	3446.09	0.343779	0.14302	0.222746	0.157919	2.40371	0.0162297	0.218111	2551.14	2700.64	3343.2	3544.81	4373.2	4120.43	3622.09	3313.18
IGF1R	ENSG00000140443	3480	insulin like growth factor 1 receptor [Source:HGNC Symbol;Acc:HGNC:5465]	protein_coding	406.177	-0.395675	0.16459	-0.237961	0.190632	-2.40401	0.0162163	0.218111	519.436	390.994	468.814	468.366	309.796	342.876	398.507	350.624
MTFR2	ENSG00000146410	113115	mitochondrial fission regulator 2 [Source:HGNC Symbol;Acc:HGNC:21115]	protein_coding	212.009	0.961527	0.400314	0.0879748	0.162357	2.40193	0.0163088	0.218749	135.762	65.3673	241.37	131.905	256.383	366.523	206.455	292.307
VDAC3	ENSG00000078668	7419	voltage dependent anion channel 3 [Source:HGNC Symbol;Acc:HGNC:12674]	protein_coding	2315.21	0.286503	0.119268	0.199418	0.125607	2.40217	0.0162982	0.218749	1836.92	1879.92	2410.22	2212.77	2808.2	2544.97	2413.13	2415.61
FAM91A1	ENSG00000176853	157769	family with sequence similarity 91 member A1 [Source:HGNC Symbol;Acc:HGNC:26306]	protein_coding	675.301	-0.28177	0.117374	-0.19713	0.123293	-2.40062	0.0163675	0.218902	782.696	771.093	666.087	739.077	579.533	668.018	576.154	619.749
FOXN2	ENSG00000170802	3344	forkhead box N2 [Source:HGNC Symbol;Acc:HGNC:5281]	protein_coding	326.375	0.540506	0.225122	0.250851	0.319068	2.40095	0.0163528	0.218902	293.954	282.048	225.124	258.129	309.796	523.182	326.487	392.278
RASA4	ENSG00000105808	10156	RAS p21 protein activator 4 [Source:HGNC Symbol;Acc:HGNC:23181]	protein_coding	122.644	-2.98328	1.24243	-0.0186976	0.114514	-2.40115	0.0163434	0.218902	197.15	397.046	3.48129	273.958	29.3772	2.95583	76.8206	0.362214
COL6A5	ENSG00000172752	256076	collagen type VI alpha 5 chain [Source:HGNC Symbol;Acc:HGNC:26674]	protein_coding	4.2728	-4.76799	1.98759	-0.0108305	0.113101	-2.39888	0.0164452	0.219728	12.9859	16.9471	3.48129	0.405863	0	0	0	0.362214
FAM53C	ENSG00000120709	51307	family with sequence similarity 53 member C [Source:HGNC Symbol;Acc:HGNC:1336]	protein_coding	1563.89	-0.311713	0.129978	-0.204385	0.138876	-2.3982	0.016476	0.219929	2012.82	1526.45	1610.68	1785.8	1508.92	1197.11	1492.24	1377.14
OASL	ENSG00000135114	8638	2'-5'-oligoadenylate synthetase like [Source:HGNC Symbol;Acc:HGNC:8090]	protein_coding	9.72169	-2.74336	1.14435	-0.0236141	0.115755	-2.3973	0.0165162	0.220253	21.2497	14.5261	17.4065	15.0169	6.67664	0	0	2.89772
AGBL3	ENSG00000146856	340351	ATP/GTP binding protein like 3 [Source:HGNC Symbol;Acc:HGNC:27981]	protein_coding	64.5875	0.867783	0.362197	0.102368	0.181305	2.39589	0.0165801	0.220893	50.7631	47.2097	34.8129	47.8918	61.4251	118.233	80.6616	75.7028
VAV2	ENSG00000160293	7410	vav guanine nucleotide exchange factor 2 [Source:HGNC Symbol;Acc:HGNC:12658]	protein_coding	314.529	0.533999	0.222918	0.253811	0.312537	2.39549	0.0165981	0.22092	169.997	290.522	305.193	260.97	372.557	393.126	362.017	361.852
CDC42	ENSG00000070831	998	cell division cycle 42 [Source:HGNC Symbol;Acc:HGNC:1736]	protein_coding	3033.85	0.316045	0.132081	0.210768	0.142313	2.39282	0.0167195	0.222083	2613.71	2257.59	3244.57	2697.77	3845.75	3118.4	3113.15	3379.82
NPM1	ENSG00000181163	4869	nucleophosmin 1 [Source:HGNC Symbol;Acc:HGNC:7910]	protein_coding	42458	0.364754	0.152456	0.227772	0.171546	2.39251	0.0167335	0.222083	30282	32264.8	49550.4	36380.3	54012.7	45753.3	42823.6	48596.9
ORMDL3	ENSG00000172057	94103	ORMDL sphingolipid biosynthesis regulator 3 [Source:HGNC Symbol;Acc:HGNC:16038]	protein_coding	522.147	-0.447082	0.18682	-0.245918	0.229944	-2.39311	0.0167062	0.222083	447.424	622.2	722.949	612.853	425.97	502.491	401.387	441.902
SYT14	ENSG00000143469	255928	synaptotagmin 14 [Source:HGNC Symbol;Acc:HGNC:23143]	protein_coding	6.10758	-5.90428	2.47134	-0.00689797	0.112671	-2.3891	0.0168897	0.223942	16.5275	24.2101	8.12302	0	0	0	0	0
PEX11G	ENSG00000104883	92960	peroxisomal biogenesis factor 11 gamma [Source:HGNC Symbol;Acc:HGNC:20208]	protein_coding	24.2028	2.58648	1.08291	0.0235257	0.115735	2.38844	0.0169199	0.224128	0	1.21051	19.7273	6.49381	40.0599	70.9399	18.2449	36.9459
	ENSG00000285589		novel transcript	protein_coding	44.7209	-3.99693	1.67373	-0.0118489	0.113236	-2.38804	0.0169387	0.224163	219.58	1.21051	1.16043	112.83	1.33533	20.6908	0.960257	0
FMNL3	ENSG00000161791	91010	formin like 3 [Source:HGNC Symbol;Acc:HGNC:23698]	protein_coding	219.415	1.00583	0.421483	0.0798861	0.152746	2.38641	0.0170138	0.224943	83.8181	99.2615	266.899	134.341	417.958	224.643	217.978	310.418
FAM98B	ENSG00000171262	283742	family with sequence similarity 98 member B [Source:HGNC Symbol;Acc:HGNC:26773]	protein_coding	566.348	0.311987	0.130929	0.208165	0.140482	2.38288	0.017178	0.226519	537.144	542.307	431.68	513.011	647.634	582.299	652.975	623.733
IVD	ENSG00000128928	3712	isovaleryl-CoA dehydrogenase [Source:HGNC Symbol;Acc:HGNC:6186]	protein_coding	555.658	0.690144	0.289638	0.157563	0.290193	2.38278	0.0171822	0.226519	321.106	570.148	409.632	396.528	491.401	1028.63	507.016	720.807
POLL	ENSG00000166169	27343	DNA polymerase lambda [Source:HGNC Symbol;Acc:HGNC:9184]	protein_coding	432.793	-0.352136	0.147805	-0.22192	0.164338	-2.38244	0.0171984	0.226519	487.562	521.728	431.68	497.182	327.156	416.772	401.387	378.876
TMEM47	ENSG00000147027	83604	transmembrane protein 47 [Source:HGNC Symbol;Acc:HGNC:18515]	protein_coding	132.912	0.853052	0.357959	0.102276	0.180878	2.3831	0.0171674	0.226519	87.3598	101.683	96.3158	90.5075	120.18	280.804	113.31	173.139
NKX3-1	ENSG00000167034	4824	NK3 homeobox 1 [Source:HGNC Symbol;Acc:HGNC:7838]	protein_coding	22.9313	-3.51118	1.47506	-0.0147314	0.11369	-2.38036	0.0172957	0.227584	46.041	15.7366	2.32086	102.277	1.33533	14.7792	0.960257	0
SMARCD2	ENSG00000108604	6603	SWI/SNF related, matrix associated, actin dependent regulator of chromatin, subfamily d, member 2 [Source:HGNC Symbol;Acc:HGNC:11107]	protein_coding	1601.11	-0.343963	0.144538	-0.218143	0.159226	-2.37974	0.0173248	0.227752	1879.42	1906.55	1529.45	1858.45	1480.88	1117.3	1653.56	1383.3
EIF2AK4	ENSG00000128829	440275	eukaryotic translation initiation factor 2 alpha kinase 4 [Source:HGNC Symbol;Acc:HGNC:19687]	protein_coding	680.634	0.475266	0.199751	0.247306	0.25528	2.37929	0.0173459	0.227769	445.063	531.412	740.355	565.367	785.173	641.415	931.449	804.841
ZNF512B	ENSG00000196700	57473	zinc finger protein 512B [Source:HGNC Symbol;Acc:HGNC:29212]	protein_coding	473.848	-0.589632	0.247847	-0.222592	0.367518	-2.37902	0.017359	0.227769	772.071	413.993	496.665	598.648	415.287	280.804	447.48	365.837
MANEAL	ENSG00000185090	149175	mannosidase endo-alpha like [Source:HGNC Symbol;Acc:HGNC:26452]	protein_coding	408.568	0.459694	0.193319	0.245088	0.241887	2.37791	0.0174111	0.228237	282.148	363.152	380.621	350.26	592.886	437.463	399.467	462.548
PGM3	ENSG00000013375	5238	phosphoglucomutase 3 [Source:HGNC Symbol;Acc:HGNC:8907]	protein_coding	743.178	0.397728	0.167353	0.233819	0.194793	2.37659	0.0174737	0.228841	682.35	745.672	510.59	623.811	854.61	954.733	705.789	867.866
STXBP1	ENSG00000136854	6812	syntaxin binding protein 1 [Source:HGNC Symbol;Acc:HGNC:11444]	protein_coding	374.941	-0.992865	0.418039	-0.0801951	0.152985	-2.37506	0.0175463	0.229575	761.446	441.835	222.803	571.455	152.227	215.776	411.95	222.037
RASGEF1A	ENSG00000198915	221002	RasGEF domain family member 1A [Source:HGNC Symbol;Acc:HGNC:24246]	protein_coding	188.39	-0.753984	0.317558	-0.127459	0.223332	-2.37432	0.0175812	0.229816	167.636	286.89	248.332	246.765	196.293	82.7633	141.158	137.279
ARTN	ENSG00000117407	9048	artemin [Source:HGNC Symbol;Acc:HGNC:727]	protein_coding	10.7759	-3.38871	1.42853	-0.0165998	0.114042	-2.37216	0.0176843	0.230727	29.5134	14.5261	1.16043	32.8749	1.33533	2.95583	3.84103	0
ELMOD3	ENSG00000115459	84173	ELMO domain containing 3 [Source:HGNC Symbol;Acc:HGNC:26158]	protein_coding	306.127	0.762343	0.32133	0.122566	0.213778	2.37246	0.0176701	0.230727	191.247	176.734	322.6	215.919	452.676	478.845	215.098	395.9
RPL26L1	ENSG00000037241	51121	ribosomal protein L26 like 1 [Source:HGNC Symbol;Acc:HGNC:17050]	protein_coding	1099.85	0.43576	0.183767	0.24045	0.223413	2.37127	0.0177272	0.23107	911.375	728.725	1177.84	918.874	1386.07	1404.02	995.786	1276.08
POMC	ENSG00000115138	5443	proopiomelanocortin [Source:HGNC Symbol;Acc:HGNC:9201]	protein_coding	6.5651	4.55116	1.92021	0.0112937	0.113152	2.37014	0.0177815	0.231342	0	2.42101	0	0	4.00599	29.5583	0.960257	15.5752
RARA	ENSG00000131759	5914	retinoic acid receptor alpha [Source:HGNC Symbol;Acc:HGNC:9864]	protein_coding	226.762	0.843497	0.355882	0.103577	0.182829	2.37016	0.0177803	0.231342	94.443	217.891	185.669	153.822	367.215	159.615	329.368	306.071
RPL13	ENSG00000167526	6137	ribosomal protein L13 [Source:HGNC Symbol;Acc:HGNC:10303]	protein_coding	22313.3	0.319938	0.135052	0.211321	0.146292	2.369	0.0178361	0.231835	16480.3	18292	20587.2	24028.7	26785.4	24778.7	27086.9	20466.9
ANKRD36	ENSG00000135976	375248	ankyrin repeat domain 36 [Source:HGNC Symbol;Acc:HGNC:24079]	protein_coding	658.648	0.638835	0.269829	0.189924	0.361086	2.36756	0.0179059	0.232526	559.575	308.679	700.9	489.471	599.563	1010.89	766.285	833.818
EPB41L4B	ENSG00000095203	54566	erythrocyte membrane protein band 4.1 like 4B [Source:HGNC Symbol;Acc:HGNC:19818]	protein_coding	135.103	0.592141	0.250258	0.214335	0.361813	2.36612	0.0179758	0.232997	120.415	76.2619	123.006	110.395	154.898	171.438	166.124	158.288
SYPL2	ENSG00000143028	284612	synaptophysin like 2 [Source:HGNC Symbol;Acc:HGNC:27638]	protein_coding	163.905	0.991134	0.41886	0.0799974	0.152728	2.36626	0.0179686	0.232997	186.525	89.5775	62.6633	100.248	295.108	215.776	127.714	233.628
BIK	ENSG00000100290	638	BCL2 interacting killer [Source:HGNC Symbol;Acc:HGNC:1051]	protein_coding	7.27718	2.92003	1.23498	0.0214287	0.115152	2.36444	0.0180573	0.233723	0	0	4.64172	2.02932	14.6886	11.8233	13.4436	11.5909
ELFN2	ENSG00000166897	114794	extracellular leucine rich repeat and fibronectin type III domain containing 2 [Source:HGNC Symbol;Acc:HGNC:29396]	protein_coding	97.2045	-0.950917	0.402258	-0.0812829	0.153426	-2.36395	0.0180815	0.233723	70.8322	135.577	169.423	133.123	53.4132	100.498	49.9334	64.8364
MAGI2	ENSG00000187391	9863	membrane associated guanylate kinase, WW and PDZ domain containing 2 [Source:HGNC Symbol;Acc:HGNC:18957]	protein_coding	28.0315	-3.7206	1.57414	-0.0134078	0.113477	-2.36358	0.0180992	0.233723	131.04	1.21051	2.32086	73.8671	1.33533	2.95583	11.5231	0
SLC25A17	ENSG00000100372	10478	solute carrier family 25 member 17 [Source:HGNC Symbol;Acc:HGNC:10987]	protein_coding	923.16	0.311582	0.13181	0.205942	0.141445	2.36386	0.0180854	0.233723	776.793	771.093	785.612	951.343	1054.91	1102.52	1053.4	889.599
XPC	ENSG00000154767	7508	XPC complex subunit, DNA damage recognition and repair factor [Source:HGNC Symbol;Acc:HGNC:12816]	protein_coding	999.835	0.394668	0.167197	0.2291	0.193608	2.36051	0.0182501	0.235451	880.681	748.093	980.564	848.66	883.988	1114.35	1381.81	1160.54
KIAA1549	ENSG00000122778	57670	KIAA1549 [Source:HGNC Symbol;Acc:HGNC:22219]	protein_coding	286.288	0.440427	0.186677	0.238544	0.227715	2.3593	0.0183093	0.235996	246.732	196.102	283.145	247.576	327.156	295.583	368.739	325.269
SPN	ENSG00000197471	6693	sialophorin [Source:HGNC Symbol;Acc:HGNC:11249]	protein_coding	3.75727	-5.20174	2.20547	-0.00878257	0.112852	-2.35857	0.0183456	0.236244	8.26376	12.1051	9.28345	0.405863	0	0	0	0
GMPPA	ENSG00000144591	29926	GDP-mannose pyrophosphorylase A [Source:HGNC Symbol;Acc:HGNC:22923]	protein_coding	465.008	-0.588614	0.249735	-0.20559	0.346454	-2.35695	0.0184255	0.237054	556.033	694.831	388.744	594.589	269.736	384.258	474.367	357.506
DNAH1	ENSG00000114841	25981	dynein axonemal heavy chain 1 [Source:HGNC Symbol;Acc:HGNC:2940]	protein_coding	108.197	-1.8534	0.786708	-0.0347757	0.119677	-2.35589	0.0184785	0.237294	272.704	81.1039	117.204	207.802	132.198	5.91166	21.1257	27.5283
SPATS2L	ENSG00000196141	26010	spermatogenesis associated serine rich 2 like [Source:HGNC Symbol;Acc:HGNC:24574]	protein_coding	307.025	0.557854	0.236776	0.225629	0.336262	2.35604	0.018471	0.237294	278.607	255.417	218.161	244.735	494.072	260.113	331.289	373.805
GTF2A2	ENSG00000140307	2958	general transcription factor IIA subunit 2 [Source:HGNC Symbol;Acc:HGNC:4647]	protein_coding	580.432	0.490473	0.208582	0.238834	0.272661	2.35146	0.0186998	0.239915	481.659	336.521	635.916	476.077	735.766	688.709	607.843	680.963
LMF1	ENSG00000103227	64788	lipase maturation factor 1 [Source:HGNC Symbol;Acc:HGNC:14154]	protein_coding	143.592	0.968183	0.412102	0.0805764	0.153065	2.34938	0.018805	0.241041	50.7631	150.103	98.6366	90.5075	275.078	121.189	163.244	199.218
CACNA2D3	ENSG00000157445	55799	calcium voltage-gated channel auxiliary subunit alpha2delta 3 [Source:HGNC Symbol;Acc:HGNC:15460]	protein_coding	94.7784	2.46807	1.05104	0.0238654	0.115833	2.3482	0.0188641	0.241576	3.54161	22.9996	80.0697	10.1466	37.3892	11.8233	404.268	187.989
C6orf120	ENSG00000185127	387263	chromosome 6 open reading frame 120 [Source:HGNC Symbol;Acc:HGNC:21247]	protein_coding	554.578	0.542416	0.231083	0.22349	0.320033	2.34728	0.0189109	0.241951	413.188	427.309	525.675	436.709	419.293	860.147	679.862	674.443
NEK11	ENSG00000114670	79858	NIMA related kinase 11 [Source:HGNC Symbol;Acc:HGNC:18593]	protein_coding	37.7739	-2.05257	0.875245	-0.0303708	0.117915	-2.34514	0.0190198	0.242897	36.5967	114.998	18.5669	72.2436	30.7126	17.735	1.92051	9.41758
TMEM222	ENSG00000186501	84065	transmembrane protein 222 [Source:HGNC Symbol;Acc:HGNC:25363]	protein_coding	276.998	0.631413	0.269236	0.18127	0.332336	2.34521	0.0190166	0.242897	147.567	234.838	276.183	213.89	365.88	236.466	398.507	342.655
ACTR3C	ENSG00000106526	653857	actin related protein 3C [Source:HGNC Symbol;Acc:HGNC:37282]	protein_coding	13.4543	-3.53539	1.50889	-0.0148256	0.113705	-2.34304	0.0191275	0.244047	56.6658	6.05253	1.16043	34.4984	5.34132	2.95583	0.960257	0
CHMP2A	ENSG00000130724	27243	charged multivesicular body protein 2A [Source:HGNC Symbol;Acc:HGNC:30216]	protein_coding	686.922	0.32741	0.13979	0.20921	0.151731	2.34216	0.0191725	0.244328	526.52	648.831	639.398	627.464	821.227	647.327	834.463	750.146
CLK3	ENSG00000179335	1198	CDC like kinase 3 [Source:HGNC Symbol;Acc:HGNC:2071]	protein_coding	529.827	0.328279	0.140214	0.209543	0.152248	2.34127	0.0192184	0.244328	500.548	434.572	476.937	473.642	624.934	487.712	649.134	591.134
KHSRP	ENSG00000088247	8570	KH-type splicing regulatory protein [Source:HGNC Symbol;Acc:HGNC:6316]	protein_coding	3741.6	-0.263887	0.112729	-0.184344	0.116522	-2.34089	0.0192376	0.244328	4437.64	4389.3	3249.21	4251.01	3414.44	3499.7	3374.34	3317.16
MRPS36	ENSG00000134056	92259	mitochondrial ribosomal protein S36 [Source:HGNC Symbol;Acc:HGNC:16631]	protein_coding	559.582	0.41909	0.179011	0.230917	0.213116	2.34114	0.0192248	0.244328	394.299	438.203	601.103	482.165	737.102	605.945	582.876	634.962
ORAI3	ENSG00000175938	93129	ORAI calcium release-activated calcium modulator 3 [Source:HGNC Symbol;Acc:HGNC:28185]	protein_coding	23.2016	3.93368	1.68032	0.0120795	0.11327	2.34104	0.0192302	0.244328	0	2.42101	9.28345	0	88.1317	2.95583	0.960257	81.8605
B4GALNT4	ENSG00000182272	338707	beta-1,4-N-acetyl-galactosaminyltransferase 4 [Source:HGNC Symbol;Acc:HGNC:26315]	protein_coding	299.241	-1.02852	0.439554	-0.0734155	0.145852	-2.33992	0.0192878	0.244517	495.826	463.624	197.273	453.349	228.341	73.8958	309.203	172.414
CA8	ENSG00000178538	767	carbonic anhydrase 8 [Source:HGNC Symbol;Acc:HGNC:1382]	protein_coding	459.676	0.347918	0.148682	0.214817	0.1646	2.34002	0.0192825	0.244517	471.034	374.046	366.696	402.616	488.73	573.431	483.969	516.88
MTRNR2L6	ENSG00000270672	100463482	MT-RNR2 like 6 [Source:HGNC Symbol;Acc:HGNC:37163]	protein_coding	3.96638	3.88539	1.66123	0.0151049	0.113743	2.33886	0.0193425	0.244987	0	1.21051	1.16043	0	6.67664	2.95583	12.4833	7.24429
KLHL5	ENSG00000109790	51088	kelch like family member 5 [Source:HGNC Symbol;Acc:HGNC:6356]	protein_coding	255.796	-1.07419	0.459451	-0.0686812	0.141457	-2.33798	0.0193884	0.245145	553.672	314.732	125.327	393.281	263.06	144.836	109.469	141.988
PARD6A	ENSG00000102981	50855	par-6 family cell polarity regulator alpha [Source:HGNC Symbol;Acc:HGNC:15943]	protein_coding	18.4928	1.79737	0.768814	0.0370809	0.120644	2.33785	0.0193953	0.245145	12.9859	1.21051	10.4439	8.52312	20.0299	23.6466	43.2116	27.8905
RPS3	ENSG00000149273	6188	ribosomal protein S3 [Source:HGNC Symbol;Acc:HGNC:10420]	protein_coding	25104.5	0.268613	0.11491	0.186375	0.119087	2.3376	0.019408	0.245145	20389.1	20375.2	24190.3	26136	30824.7	26076.3	28851.9	23992.4
SNRPC	ENSG00000124562	6631	small nuclear ribonucleoprotein polypeptide C [Source:HGNC Symbol;Acc:HGNC:11157]	protein_coding	1284.15	0.377014	0.16156	0.221127	0.183765	2.33358	0.0196176	0.247145	1265.54	809.829	1297.36	1096.24	1364.71	1489.74	1475.91	1473.85
TDRD7	ENSG00000196116	23424	tudor domain containing 7 [Source:HGNC Symbol;Acc:HGNC:30831]	protein_coding	225.223	1.51341	0.648519	0.0441365	0.124154	2.33363	0.0196149	0.247145	15.347	85.946	283.145	83.2019	231.012	399.037	316.885	387.207
URB1	ENSG00000142207	9875	URB1 ribosome biogenesis homolog [Source:HGNC Symbol;Acc:HGNC:17344]	protein_coding	803.017	0.391711	0.167861	0.224392	0.194019	2.33354	0.0196198	0.247145	806.307	725.093	569.772	674.138	949.419	1031.59	727.875	939.947
BNIP3L	ENSG00000104765	665	BCL2 interacting protein 3 like [Source:HGNC Symbol;Acc:HGNC:1085]	protein_coding	802.858	0.321297	0.137713	0.205922	0.148845	2.33309	0.0196433	0.247217	690.614	732.356	717.146	712.695	1034.88	913.352	727.875	893.945
NAAA	ENSG00000138744	27163	N-acylethanolamine acid amidase [Source:HGNC Symbol;Acc:HGNC:736]	protein_coding	216.194	1.23298	0.528623	0.0572341	0.132352	2.33244	0.0196774	0.247419	169.997	52.0518	187.99	106.336	483.389	295.583	96.9859	337.222
NACC2	ENSG00000148411	138151	NACC family member 2 [Source:HGNC Symbol;Acc:HGNC:23846]	protein_coding	247.113	-0.435528	0.186753	-0.23025	0.226476	-2.33211	0.0196951	0.247419	243.191	334.1	269.22	288.569	221.665	218.731	189.171	212.258
SETD1B	ENSG00000139718	23067	SET domain containing 1B, histone lysine methyltransferase [Source:HGNC Symbol;Acc:HGNC:29187]	protein_coding	209.958	-0.581711	0.249473	-0.199094	0.332282	-2.33176	0.0197135	0.247427	247.913	180.365	323.76	256.505	153.563	153.703	193.972	169.879
ALS2CL	ENSG00000178038	259173	ALS2 C-terminal like [Source:HGNC Symbol;Acc:HGNC:20605]	protein_coding	93.6647	-1.26366	0.542165	-0.0554265	0.131027	-2.33077	0.0197656	0.247633	175.9	53.2623	158.979	142.052	102.82	26.6025	42.2513	47.4501
MAN2B2	ENSG00000013288	23324	mannosidase alpha class 2B member 2 [Source:HGNC Symbol;Acc:HGNC:29623]	protein_coding	210.356	-0.51199	0.219659	-0.225127	0.29121	-2.33084	0.0197616	0.247633	246.732	277.206	213.519	252.447	136.204	174.394	210.296	172.052
YJEFN3	ENSG00000250067	374887	YjeF N-terminal domain containing 3 [Source:HGNC Symbol;Acc:HGNC:24785]	protein_coding	114.899	0.747561	0.320904	0.11882	0.205315	2.32955	0.0198301	0.248216	92.0819	104.104	61.5028	83.2019	110.832	200.997	121.953	144.524
SAMD15	ENSG00000100583	161394	sterile alpha motif domain containing 15 [Source:HGNC Symbol;Acc:HGNC:18631]	protein_coding	29.3864	-1.47657	0.634187	-0.0468717	0.125646	-2.3283	0.0198964	0.248822	36.5967	39.9467	49.8985	48.2977	17.3593	2.95583	28.8077	11.2286
AK3	ENSG00000147853	50808	adenylate kinase 3 [Source:HGNC Symbol;Acc:HGNC:17376]	protein_coding	366.416	0.522033	0.224287	0.220446	0.300052	2.32752	0.0199376	0.249011	264.44	244.522	393.386	297.498	425.97	526.138	347.613	431.76
PRR5	ENSG00000186654	55615	proline rich 5 [Source:HGNC Symbol;Acc:HGNC:31682]	protein_coding	145.808	0.701506	0.30142	0.13338	0.230888	2.32733	0.0199475	0.249011	74.3738	159.787	102.118	108.365	156.233	180.306	204.535	180.745
ZNF695	ENSG00000197472	57116	zinc finger protein 695 [Source:HGNC Symbol;Acc:HGNC:30954]	protein_coding	34.3548	-3.80904	1.63725	-0.0123446	0.113307	-2.32649	0.0199923	0.249346	1.18054	1.21051	169.423	84.4195	14.6886	2.95583	0.960257	0
SPINT2	ENSG00000167642	10653	serine peptidase inhibitor, Kunitz type 2 [Source:HGNC Symbol;Acc:HGNC:11247]	protein_coding	78.1143	-0.910816	0.391659	-0.0868447	0.159856	-2.32554	0.0200434	0.249759	89.7208	146.471	67.305	106.742	57.4191	35.47	68.1782	53.6077
WEE1	ENSG00000166483	7465	WEE1 G2 checkpoint kinase [Source:HGNC Symbol;Acc:HGNC:12761]	protein_coding	667.983	-0.249777	0.107424	-0.177567	0.109905	-2.32516	0.0200637	0.249787	777.974	680.305	713.665	732.583	648.97	585.255	591.518	613.591
MAP7D3	ENSG00000129680	79649	MAP7 domain containing 3 [Source:HGNC Symbol;Acc:HGNC:25742]	protein_coding	1056.87	0.65416	0.281684	0.151003	0.263931	2.32232	0.0202157	0.25078	824.015	1043.46	661.446	752.064	994.82	1992.23	798.934	1388.01
PDLIM3	ENSG00000154553	27295	PDZ and LIM domain 3 [Source:HGNC Symbol;Acc:HGNC:20767]	protein_coding	180.754	0.635254	0.273504	0.160559	0.281226	2.32265	0.0201981	0.25078	148.748	128.314	120.685	162.751	189.617	319.23	187.25	189.438
RTN3	ENSG00000133318	10313	reticulon 3 [Source:HGNC Symbol;Acc:HGNC:10469]	protein_coding	2945	-0.185426	0.0798221	-0.145369	0.0788829	-2.32299	0.0201799	0.25078	2991.48	3205.42	3143.61	3188.87	2474.36	2905.58	2910.54	2740.15
ZNF25	ENSG00000175395	219749	zinc finger protein 25 [Source:HGNC Symbol;Acc:HGNC:13043]	protein_coding	20.1201	-3.38221	1.45599	-0.0151546	0.113767	-2.32296	0.0201814	0.25078	1.18054	18.1576	66.1446	60.8795	10.6826	2.95583	0.960257	0
SERTAD3	ENSG00000167565	29946	SERTA domain containing 3 [Source:HGNC Symbol;Acc:HGNC:17931]	protein_coding	170.706	0.754396	0.325147	0.115175	0.198966	2.32017	0.0203319	0.251996	83.8181	105.314	194.952	124.194	168.251	224.643	246.786	217.691
MACROH2A2	ENSG00000099284	55506	macroH2A.2 histone [Source:HGNC Symbol;Acc:HGNC:14453]	protein_coding	849.783	-0.527638	0.227595	-0.20432	0.291517	-2.31832	0.0204319	0.253009	1317.48	717.83	922.543	1060.93	778.497	508.403	818.139	674.443
BTN3A2	ENSG00000186470	11118	butyrophilin subfamily 3 member A2 [Source:HGNC Symbol;Acc:HGNC:1139]	protein_coding	420.646	-0.832381	0.359394	-0.0960401	0.170843	-2.31607	0.0205545	0.253455	796.863	386.152	375.98	593.372	435.317	339.921	162.283	275.283
GNG12	ENSG00000172380	55970	G protein subunit gamma 12 [Source:HGNC Symbol;Acc:HGNC:19663]	protein_coding	841.482	-0.440489	0.190278	-0.225352	0.231324	-2.31498	0.0206141	0.253455	696.517	1218.98	958.516	1005.32	727.754	620.725	799.894	704.145
HLA-DPA1	ENSG00000231389	3113	major histocompatibility complex, class II, DP alpha 1 [Source:HGNC Symbol;Acc:HGNC:4938]	protein_coding	310.275	0.378124	0.163229	0.218889	0.185752	2.31652	0.0205298	0.253455	253.815	267.522	255.295	297.903	395.257	363.567	329.368	319.473
MGARP	ENSG00000137463	84709	mitochondria localized glutamic acid rich protein [Source:HGNC Symbol;Acc:HGNC:29969]	protein_coding	153.701	1.48165	0.639761	0.0445249	0.124323	2.31594	0.0205614	0.253455	149.928	81.1039	31.3316	63.3146	272.407	38.4258	323.607	269.488
SCARB2	ENSG00000138760	950	scavenger receptor class B member 2 [Source:HGNC Symbol;Acc:HGNC:1665]	protein_coding	1251.67	-0.445425	0.192374	-0.224068	0.235036	-2.3154	0.0205909	0.253455	1914.83	1085.82	1252.11	1517.52	913.365	1167.55	1138.86	1023.26
SNRNP200	ENSG00000144028	23020	small nuclear ribonucleoprotein U5 subunit 200 [Source:HGNC Symbol;Acc:HGNC:30859]	protein_coding	4523.8	-0.187122	0.0808236	-0.146836	0.079918	-2.31519	0.0206023	0.253455	4650.14	5167.65	4544.25	4915.81	4558.81	3842.58	4316.35	4194.81
SORD	ENSG00000140263	6652	sorbitol dehydrogenase [Source:HGNC Symbol;Acc:HGNC:11184]	protein_coding	818.831	-0.354033	0.152889	-0.210428	0.169399	-2.31562	0.0205792	0.253455	1054.22	952.668	713.665	957.025	718.407	668.018	780.689	705.956
USP46	ENSG00000109189	64854	ubiquitin specific peptidase 46 [Source:HGNC Symbol;Acc:HGNC:20075]	protein_coding	499.027	-0.339437	0.146556	-0.20959	0.160539	-2.31609	0.0205532	0.253455	630.407	489.045	547.723	567.802	441.994	387.214	486.85	441.177
MRPL9	ENSG00000143436	65005	mitochondrial ribosomal protein L9 [Source:HGNC Symbol;Acc:HGNC:14277]	protein_coding	936.985	-0.595507	0.25728	-0.185192	0.320424	-2.31463	0.0206333	0.253467	1090.82	1522.82	677.692	1222.87	761.137	573.431	942.972	704.145
MRAP2	ENSG00000135324	112609	melanocortin 2 receptor accessory protein 2 [Source:HGNC Symbol;Acc:HGNC:21232]	protein_coding	17.9936	3.50297	1.51388	0.0142783	0.113613	2.31391	0.0206729	0.253728	1.18054	9.68405	1.16043	0	2.67066	53.205	2.88077	73.1673
NSG1	ENSG00000168824	27065	neuronal vesicle trafficking associated 1 [Source:HGNC Symbol;Acc:HGNC:18790]	protein_coding	179.405	0.830364	0.359176	0.0971488	0.172369	2.31186	0.0207856	0.254714	125.137	104.104	168.263	122.165	264.395	106.41	308.242	236.526
PSMA3	ENSG00000100567	5684	proteasome 20S subunit alpha 3 [Source:HGNC Symbol;Acc:HGNC:9532]	protein_coding	1866.81	0.357431	0.154613	0.213484	0.172376	2.31178	0.02079	0.254714	1443.8	1354.56	1936.76	1810.55	2466.35	1909.47	2107.76	1905.25
FAM104A	ENSG00000133193	84923	family with sequence similarity 104 member A [Source:HGNC Symbol;Acc:HGNC:25918]	protein_coding	500.427	-0.918324	0.39738	-0.082605	0.154885	-2.31095	0.0208357	0.255048	901.93	398.257	588.339	729.742	632.946	263.069	180.528	308.607
ACOT9	ENSG00000123130	23597	acyl-CoA thioesterase 9 [Source:HGNC Symbol;Acc:HGNC:17152]	protein_coding	523.954	-0.401485	0.173777	-0.2209	0.202273	-2.31035	0.0208688	0.255229	589.088	593.148	591.82	611.636	341.844	467.021	551.187	445.886
TCF7	ENSG00000081059	6932	transcription factor 7 [Source:HGNC Symbol;Acc:HGNC:11639]	protein_coding	160.643	-1.1991	0.519384	-0.0576697	0.132528	-2.3087	0.0209605	0.256124	272.704	302.627	69.6259	251.635	165.581	50.2491	91.2244	81.4983
NDUFB2	ENSG00000090266	4708	NADH:ubiquinone oxidoreductase subunit B2 [Source:HGNC Symbol;Acc:HGNC:7697]	protein_coding	1024.95	0.467011	0.202339	0.225685	0.254344	2.30807	0.0209955	0.256326	638.671	720.251	1045.55	1032.92	1367.38	1211.89	1195.52	987.397
BIN1	ENSG00000136717	274	bridging integrator 1 [Source:HGNC Symbol;Acc:HGNC:1052]	protein_coding	257.609	0.611577	0.265232	0.168086	0.290199	2.30582	0.0211207	0.257628	136.942	284.469	198.434	197.655	319.144	257.157	350.494	316.575
TIMM9	ENSG00000100575	26520	translocase of inner mitochondrial membrane 9 [Source:HGNC Symbol;Acc:HGNC:11819]	protein_coding	681.16	0.6447	0.2797	0.151221	0.262625	2.30497	0.0211683	0.257982	319.926	538.675	763.564	504.082	1062.92	780.339	615.525	864.244
MCEE	ENSG00000124370	84693	methylmalonyl-CoA epimerase [Source:HGNC Symbol;Acc:HGNC:16732]	protein_coding	117.005	1.26736	0.55016	0.0537207	0.129822	2.30363	0.0212437	0.258673	75.5544	123.472	18.5669	57.2267	201.635	189.173	89.3039	181.107
NME1-NME2	ENSG00000011052	654364	NME1-NME2 readthrough [Source:HGNC Symbol;Acc:HGNC:33531]	protein_coding	13.6272	3.46394	1.5041	0.0146535	0.113676	2.303	0.021279	0.258739	4.72215	3.63152	1.16043	0	9.3473	0	47.0526	43.1035
STARD9	ENSG00000159433	57519	StAR related lipid transfer domain containing 9 [Source:HGNC Symbol;Acc:HGNC:19162]	protein_coding	324.045	0.717022	0.311405	0.121133	0.207679	2.30253	0.0213051	0.258739	237.288	236.049	273.862	230.124	220.329	623.68	350.494	420.531
ZNF324B	ENSG00000249471	388569	zinc finger protein 324B [Source:HGNC Symbol;Acc:HGNC:33107]	protein_coding	116.272	0.828696	0.359898	0.0968531	0.171872	2.30259	0.021302	0.258739	74.3738	75.0514	104.439	83.6078	200.299	73.8958	164.204	154.303
APBA1	ENSG00000107282	320	amyloid beta precursor protein binding family A member 1 [Source:HGNC Symbol;Acc:HGNC:578]	protein_coding	28.9768	3.53833	1.53892	0.0136025	0.113501	2.29922	0.0214922	0.260328	1.18054	1.21051	16.246	0	1.33533	97.5424	6.7218	107.578
AURKC	ENSG00000105146	6795	aurora kinase C [Source:HGNC Symbol;Acc:HGNC:11391]	protein_coding	7.37498	3.26013	1.41755	0.0169123	0.114089	2.29983	0.0214578	0.260328	3.54161	1.21051	1.16043	0	2.67066	23.6466	5.76154	21.0084
PITX2	ENSG00000164093	5308	paired like homeodomain 2 [Source:HGNC Symbol;Acc:HGNC:9005]	protein_coding	155.789	-0.544607	0.23686	-0.204018	0.312131	-2.29928	0.021489	0.260328	164.095	220.312	163.621	187.509	117.509	156.659	109.469	127.137
ANKRD17	ENSG00000132466	26057	ankyrin repeat domain 17 [Source:HGNC Symbol;Acc:HGNC:23575]	protein_coding	2068.83	-0.19176	0.0834387	-0.148457	0.0825737	-2.29821	0.0215497	0.2605	2167.47	2371.38	2173.49	2129.56	1890.83	1770.54	2008.86	2038.54
ID2	ENSG00000115738	3398	inhibitor of DNA binding 2 [Source:HGNC Symbol;Acc:HGNC:5361]	protein_coding	2125.12	0.625047	0.27197	0.156603	0.269498	2.29822	0.0215492	0.2605	1740.11	841.302	2564.55	1541.47	2260.71	2734.14	2582.13	2736.53
RBBP7	ENSG00000102054	5931	RB binding protein 7, chromatin remodeling factor [Source:HGNC Symbol;Acc:HGNC:9890]	protein_coding	4074.94	-0.154581	0.0672682	-0.128281	0.0657435	-2.29798	0.0215627	0.2605	4197.99	4379.61	4321.45	4292	3792.33	3561.78	4140.63	3913.73
EDIL3	ENSG00000164176	10085	EGF like repeats and discoidin domains 3 [Source:HGNC Symbol;Acc:HGNC:3173]	protein_coding	132.836	-0.873114	0.380089	-0.0885107	0.161419	-2.29713	0.0216115	0.260525	230.205	152.524	124.166	183.044	144.216	50.2491	90.2642	88.0181
SAGE1	ENSG00000181433	55511	sarcoma antigen 1 [Source:HGNC Symbol;Acc:HGNC:30369]	protein_coding	460.794	-0.287078	0.124961	-0.190332	0.13101	-2.29733	0.0215998	0.260525	507.631	489.045	522.194	509.358	377.898	407.905	453.241	419.082
SNRNP25	ENSG00000161981	79622	small nuclear ribonucleoprotein U11/U12 subunit 25 [Source:HGNC Symbol;Acc:HGNC:14161]	protein_coding	502.557	0.391246	0.170332	0.217837	0.195971	2.29696	0.0216212	0.260525	387.216	389.783	485.06	478.107	655.646	484.756	616.485	523.4
CCN1	ENSG00000142871	3491	cellular communication network factor 1 [Source:HGNC Symbol;Acc:HGNC:2654]	protein_coding	154.824	-0.505273	0.220158	-0.211523	0.282168	-2.29505	0.0217303	0.261332	186.525	203.365	152.016	184.668	109.497	133.012	140.198	129.311
MED15	ENSG00000099917	51586	mediator complex subunit 15 [Source:HGNC Symbol;Acc:HGNC:14248]	protein_coding	844.584	0.270815	0.118012	0.184229	0.122433	2.2948	0.0217447	0.261332	831.098	671.831	767.045	784.533	871.97	1028.63	897.84	903.725
SNAP47	ENSG00000143740	116841	synaptosome associated protein 47 [Source:HGNC Symbol;Acc:HGNC:30669]	protein_coding	787.32	-0.576991	0.251396	-0.174307	0.286273	-2.29515	0.0217244	0.261332	1300.95	639.147	819.264	1008.57	782.503	673.929	474.367	599.827
LRRK2	ENSG00000188906	120892	leucine rich repeat kinase 2 [Source:HGNC Symbol;Acc:HGNC:18618]	protein_coding	21.9995	1.20441	0.52501	0.0586032	0.133133	2.29407	0.0217866	0.261383	17.7081	8.47354	12.7647	14.2052	29.3772	29.5583	34.5692	29.3394
NEURL1	ENSG00000107954	9148	neuralized E3 ubiquitin protein ligase 1 [Source:HGNC Symbol;Acc:HGNC:7761]	protein_coding	13.324	-3.40286	1.48323	-0.0146951	0.113661	-2.29422	0.0217776	0.261383	1.18054	18.1576	29.0108	47.0801	1.33533	8.86749	0.960257	0
CEP112	ENSG00000154240	201134	centrosomal protein 112 [Source:HGNC Symbol;Acc:HGNC:28514]	protein_coding	136.57	1.16406	0.507682	0.0592791	0.13368	2.29289	0.0218544	0.261969	179.442	33.8942	52.2194	72.2436	214.988	159.615	171.886	208.273
DAAM1	ENSG00000100592	23002	dishevelled associated activator of morphogenesis 1 [Source:HGNC Symbol;Acc:HGNC:18142]	protein_coding	330.432	-0.399625	0.174368	-0.217726	0.202165	-2.29185	0.0219145	0.262404	377.772	335.31	414.274	378.67	340.509	251.246	257.349	288.323
RNF125	ENSG00000101695	54941	ring finger protein 125 [Source:HGNC Symbol;Acc:HGNC:21150]	protein_coding	209.344	-0.563482	0.24589	-0.182496	0.293671	-2.2916	0.0219285	0.262404	229.024	256.627	257.616	253.259	214.988	180.306	115.231	167.705
FRMD8	ENSG00000126391	83786	FERM domain containing 8 [Source:HGNC Symbol;Acc:HGNC:25462]	protein_coding	257.104	-0.650229	0.283831	-0.138882	0.234917	-2.2909	0.0219692	0.262665	315.203	370.415	237.888	333.214	289.766	171.438	144.039	194.871
PSMA6	ENSG00000100902	5687	proteasome 20S subunit alpha 6 [Source:HGNC Symbol;Acc:HGNC:9535]	protein_coding	481.256	0.437765	0.191235	0.219123	0.230959	2.28914	0.022071	0.263428	351.8	331.679	497.825	451.32	642.293	543.873	528.141	503.116
	ENSG00000284906		novel transcript	protein_coding	5.60901	-4.87932	2.13146	-0.00890098	0.112853	-2.28919	0.0220686	0.263428	21.2497	6.05253	0	16.2345	1.33533	0	0	0
RPS15A	ENSG00000134419	6210	ribosomal protein S15a [Source:HGNC Symbol;Acc:HGNC:10389]	protein_coding	12013.1	0.417057	0.182224	0.217843	0.215256	2.28871	0.0220964	0.263504	8656.88	8045.03	14571.5	9879.11	14309.4	15133.9	11308.9	14200.3
PCIF1	ENSG00000100982	63935	phosphorylated CTD interacting factor 1 [Source:HGNC Symbol;Acc:HGNC:16200]	protein_coding	410.483	0.539658	0.235927	0.196988	0.299341	2.28739	0.0221731	0.263965	240.83	389.783	382.942	326.314	365.88	472.933	604.962	500.218
TMEM74B	ENSG00000125895	55321	transmembrane protein 74B [Source:HGNC Symbol;Acc:HGNC:15893]	protein_coding	124.984	-0.974797	0.426152	-0.0747836	0.146746	-2.28744	0.0221701	0.263965	263.26	122.261	100.958	178.58	85.461	50.2491	121.953	77.1517
EIF1AX	ENSG00000173674	1964	eukaryotic translation initiation factor 1A X-linked [Source:HGNC Symbol;Acc:HGNC:3250]	protein_coding	3075.41	0.218944	0.0957915	0.161306	0.0960727	2.28563	0.0222759	0.264799	2951.34	2707.9	2704.96	2998.11	3740.26	3343.04	2988.32	3169.38
IQCE	ENSG00000106012	23288	IQ motif containing E [Source:HGNC Symbol;Acc:HGNC:29171]	protein_coding	295.299	-1.24167	0.543353	-0.0534818	0.129563	-2.28521	0.0223005	0.264799	441.521	648.831	82.3906	489.065	223	94.5866	243.905	139.09
NUCKS1	ENSG00000069275	64710	nuclear casein kinase and cyclin dependent kinase substrate 1 [Source:HGNC Symbol;Acc:HGNC:29923]	protein_coding	8997.17	-0.13088	0.0572654	-0.110162	0.0555823	-2.2855	0.0222837	0.264799	9721.72	9049.75	9230.07	9605.15	8110.79	8953.21	8789.23	8517.47
LCN15	ENSG00000177984	389812	lipocalin 15 [Source:HGNC Symbol;Acc:HGNC:33777]	protein_coding	25.258	-2.36648	1.03596	-0.0237619	0.11573	-2.28435	0.0223511	0.265086	4.72215	18.1576	98.6366	45.8625	10.6826	17.735	1.92051	4.34657
PELI3	ENSG00000174516	246330	pellino E3 ubiquitin protein ligase family member 3 [Source:HGNC Symbol;Acc:HGNC:30010]	protein_coding	45.13	-3.49872	1.53174	-0.0134847	0.113481	-2.28415	0.0223628	0.265086	1.18054	141.629	2.32086	186.697	8.01197	2.95583	18.2449	0
CSPP1	ENSG00000104218	79848	centrosome and spindle pole associated protein 1 [Source:HGNC Symbol;Acc:HGNC:26193]	protein_coding	745.453	0.562705	0.246459	0.183488	0.296814	2.28316	0.0224212	0.265324	643.393	417.625	770.526	575.92	1145.71	869.014	620.326	921.111
KLHL42	ENSG00000087448	57542	kelch like family member 42 [Source:HGNC Symbol;Acc:HGNC:29252]	protein_coding	353.538	-0.601589	0.263466	-0.160025	0.268869	-2.28336	0.022409	0.265324	605.616	335.31	305.193	456.19	240.359	322.186	292.878	270.574
VPS25	ENSG00000131475	84313	vacuolar protein sorting 25 homolog [Source:HGNC Symbol;Acc:HGNC:28122]	protein_coding	1780.3	0.337168	0.147705	0.204211	0.161341	2.28271	0.0224473	0.265407	1369.42	1324.29	1913.55	1683.93	2260.71	1891.73	1933	1865.77
CBR1	ENSG00000159228	873	carbonyl reductase 1 [Source:HGNC Symbol;Acc:HGNC:1548]	protein_coding	775.777	-0.724787	0.317615	-0.112107	0.191567	-2.28197	0.0224914	0.265496	866.514	1423.56	515.231	1064.58	685.024	384.258	734.597	532.455
CUTC	ENSG00000119929	51076	cutC copper transporter [Source:HGNC Symbol;Acc:HGNC:24271]	protein_coding	556.584	0.373876	0.163865	0.211827	0.185066	2.28161	0.0225123	0.265496	465.132	389.783	597.622	487.847	622.263	602.99	662.577	624.458
ZBTB21	ENSG00000173276	49854	zinc finger and BTB domain containing 21 [Source:HGNC Symbol;Acc:HGNC:13083]	protein_coding	663.687	-0.334087	0.146407	-0.203674	0.159389	-2.2819	0.0224953	0.265496	716.586	837.67	656.804	756.123	658.317	487.712	614.564	581.716
IAH1	ENSG00000134330	285148	isoamyl acetate hydrolyzing esterase 1 (putative) [Source:HGNC Symbol;Acc:HGNC:27696]	protein_coding	483.916	0.474332	0.208016	0.211863	0.25901	2.28027	0.0225915	0.266203	390.758	457.571	374.819	391.658	500.748	753.737	425.394	576.645
CDKN2A	ENSG00000147889	1029	cyclin dependent kinase inhibitor 2A [Source:HGNC Symbol;Acc:HGNC:1787]	protein_coding	4033.98	0.420814	0.184595	0.216019	0.218565	2.27966	0.022628	0.266212	2789.61	2792.64	3818.98	4392.25	5400.07	4481.04	5013.5	3583.75
DMRTA2	ENSG00000142700	63950	DMRT like family A2 [Source:HGNC Symbol;Acc:HGNC:13908]	protein_coding	44.6751	0.859931	0.37728	0.0889252	0.161506	2.27929	0.0226498	0.266212	38.9577	31.4732	23.2086	32.8749	50.7425	62.0725	63.377	54.6944
HMGB2	ENSG00000164104	3148	high mobility group box 2 [Source:HGNC Symbol;Acc:HGNC:5000]	protein_coding	4652.12	0.231573	0.101585	0.167914	0.102712	2.2796	0.0226312	0.266212	4131.88	4070.93	4403.84	4501.43	5704.52	5264.34	4321.16	4818.9
SLC35A3	ENSG00000117620	23443	solute carrier family 35 member A3 [Source:HGNC Symbol;Acc:HGNC:11023]	protein_coding	235.896	0.679658	0.298279	0.128359	0.218204	2.2786	0.0226911	0.266305	263.26	139.208	150.856	173.709	385.91	224.643	249.667	299.914
ZNF92	ENSG00000146757	168374	zinc finger protein 92 [Source:HGNC Symbol;Acc:HGNC:13168]	protein_coding	625.589	0.372309	0.1634	0.210586	0.18438	2.27851	0.0226961	0.266305	471.034	619.779	553.526	532.898	745.113	801.03	565.591	715.736
NEXN	ENSG00000162614	91624	nexilin F-actin binding protein [Source:HGNC Symbol;Acc:HGNC:29557]	protein_coding	135.957	0.59772	0.262506	0.160294	0.26805	2.27698	0.0227876	0.267152	121.595	98.051	104.439	106.336	118.844	209.864	165.164	163.359
ATP5MF	ENSG00000241468	9551	ATP synthase membrane subunit f [Source:HGNC Symbol;Acc:HGNC:848]	protein_coding	1206.13	0.322114	0.141529	0.199339	0.152534	2.27596	0.0228483	0.267267	888.945	996.247	1293.88	1105.98	1444.83	1374.46	1242.57	1302.16
PPP1R37	ENSG00000104866	284352	protein phosphatase 1 regulatory subunit 37 [Source:HGNC Symbol;Acc:HGNC:27607]	protein_coding	268.502	-0.725831	0.318863	-0.112734	0.192885	-2.27631	0.0228277	0.267267	452.146	220.312	306.354	359.595	292.437	180.306	143.078	193.785
TMEM80	ENSG00000177042	283232	transmembrane protein 80 [Source:HGNC Symbol;Acc:HGNC:27453]	protein_coding	167.214	0.976427	0.429039	0.0730163	0.14498	2.27585	0.0228552	0.267267	108.609	154.945	84.7115	100.654	194.958	363.567	94.1052	236.164
VPS4B	ENSG00000119541	9525	vacuolar protein sorting 4 homolog B [Source:HGNC Symbol;Acc:HGNC:10895]	protein_coding	272.58	1.26977	0.558047	0.0519014	0.128567	2.27539	0.0228827	0.267363	41.3188	163.418	309.835	124.194	176.263	608.901	321.686	435.02
LRRC34	ENSG00000171757	151827	leucine rich repeat containing 34 [Source:HGNC Symbol;Acc:HGNC:28408]	protein_coding	195.792	0.939349	0.412958	0.0771194	0.148907	2.27468	0.0229249	0.26763	204.233	107.735	105.599	121.353	411.281	121.189	218.939	276.007
MED31	ENSG00000108590	51003	mediator complex subunit 31 [Source:HGNC Symbol;Acc:HGNC:24260]	protein_coding	172.449	0.604124	0.265634	0.157159	0.263795	2.27427	0.0229497	0.267695	95.6235	128.314	177.546	144.081	180.269	236.466	222.78	194.509
PRDX5	ENSG00000126432	25824	peroxiredoxin 5 [Source:HGNC Symbol;Acc:HGNC:9355]	protein_coding	3140.79	0.425741	0.187293	0.214768	0.222624	2.27313	0.0230183	0.268045	2078.93	2136.54	3172.62	3328.48	3744.26	3762.77	4026.36	2876.35
SLC19A2	ENSG00000117479	10560	solute carrier family 19 member 2 [Source:HGNC Symbol;Acc:HGNC:10938]	protein_coding	191.219	0.782793	0.344326	0.100484	0.17589	2.2734	0.0230019	0.268045	160.553	197.313	74.2676	132.311	280.419	171.438	254.468	258.983
POLR2I	ENSG00000105258	5438	RNA polymerase II subunit I [Source:HGNC Symbol;Acc:HGNC:9196]	protein_coding	689.011	0.359837	0.15835	0.207888	0.176209	2.27241	0.0230619	0.268327	512.353	614.937	630.114	659.122	823.898	650.283	904.562	716.822
SNX13	ENSG00000071189	23161	sorting nexin 13 [Source:HGNC Symbol;Acc:HGNC:21335]	protein_coding	509.547	-0.463413	0.204072	-0.211499	0.250362	-2.27083	0.0231572	0.26921	432.077	712.988	619.67	601.083	510.096	357.656	421.553	421.255
AFMID	ENSG00000183077	125061	arylformamidase [Source:HGNC Symbol;Acc:HGNC:20910]	protein_coding	427.811	-0.639008	0.281459	-0.139241	0.234621	-2.27034	0.023187	0.269331	447.424	731.146	343.488	559.279	407.275	372.435	244.866	316.575
SYT3	ENSG00000213023	84258	synaptotagmin 3 [Source:HGNC Symbol;Acc:HGNC:11511]	protein_coding	72.5491	-0.746963	0.329072	-0.108828	0.187232	-2.26991	0.0232133	0.269411	72.0128	105.314	97.4762	91.725	52.0778	38.4258	67.218	56.1432
EP300	ENSG00000100393	2033	E1A binding protein p300 [Source:HGNC Symbol;Acc:HGNC:3373]	protein_coding	1055.38	-0.424761	0.187167	-0.212988	0.221421	-2.26942	0.0232425	0.269524	1215.95	1390.87	971.281	1267.92	962.772	659.15	1101.41	873.661
GTF2H4	ENSG00000213780	2968	general transcription factor IIH subunit 4 [Source:HGNC Symbol;Acc:HGNC:4658]	protein_coding	4.71951	5.8064	2.56051	0.00649894	0.112636	2.26767	0.0233491	0.270533	0	0	0	0	0	23.6466	2.88077	11.2286
UBN1	ENSG00000118900	29855	ubinuclein 1 [Source:HGNC Symbol;Acc:HGNC:12506]	protein_coding	1084.91	-0.20544	0.0906281	-0.15385	0.0901295	-2.26685	0.0233993	0.270889	1107.34	1166.93	1243.98	1133.98	950.754	1010.89	1014.99	1050.42
BAG5	ENSG00000166170	9529	BAG cochaperone 5 [Source:HGNC Symbol;Acc:HGNC:941]	protein_coding	703.043	-0.601671	0.265562	-0.158212	0.26644	-2.26565	0.0234727	0.271286	936.166	952.668	597.622	909.539	558.167	348.788	795.093	526.298
TTLL9	ENSG00000131044	164395	tubulin tyrosine ligase like 9 [Source:HGNC Symbol;Acc:HGNC:16118]	protein_coding	9.43951	6.81222	3.00652	0.00460257	0.112503	2.26581	0.0234629	0.271286	0	0	0	0	0	62.0725	13.4436	0
LSM2	ENSG00000204392	57819	LSM2 homolog, U6 small nuclear RNA and mRNA degradation associated [Source:HGNC Symbol;Acc:HGNC:13940]	protein_coding	683.171	-0.48248	0.213048	-0.205207	0.262987	-2.26465	0.0235339	0.271767	730.753	606.464	1032.78	819.032	504.754	490.668	717.312	563.606
TXNL1	ENSG00000091164	9352	thioredoxin like 1 [Source:HGNC Symbol;Acc:HGNC:12436]	protein_coding	716.279	-0.696285	0.308026	-0.118537	0.201505	-2.26047	0.0237918	0.274288	688.253	944.195	946.912	954.59	393.922	945.866	353.375	503.116
WDR41	ENSG00000164253	55255	WD repeat domain 41 [Source:HGNC Symbol;Acc:HGNC:25601]	protein_coding	863.397	-0.52301	0.231351	-0.18758	0.276743	-2.26068	0.0237792	0.274288	861.792	863.091	1299.68	1054.84	737.102	472.933	929.529	688.208
MED11	ENSG00000161920	400569	mediator complex subunit 11 [Source:HGNC Symbol;Acc:HGNC:32687]	protein_coding	572.505	0.50225	0.222311	0.198404	0.274476	2.25922	0.0238696	0.274956	344.717	474.518	603.424	471.613	819.892	682.797	519.499	663.577
FOXK2	ENSG00000141568	3607	forkhead box K2 [Source:HGNC Symbol;Acc:HGNC:6036]	protein_coding	1669.24	-0.50413	0.223193	-0.184363	0.259402	-2.25872	0.0239009	0.275089	2204.06	2336.28	1174.36	2111.71	1143.04	1690.74	1398.13	1295.64
TTLL1	ENSG00000100271	25809	tubulin tyrosine ligase like 1 [Source:HGNC Symbol;Acc:HGNC:1312]	protein_coding	26.1188	-3.51527	1.55745	-0.0133184	0.113449	-2.25707	0.0240039	0.276045	3.54161	1.21051	125.327	62.097	1.33533	2.95583	12.4833	0
KCNC1	ENSG00000129159	3746	potassium voltage-gated channel subfamily C member 1 [Source:HGNC Symbol;Acc:HGNC:6233]	protein_coding	186.457	0.560349	0.248339	0.173884	0.279661	2.25639	0.0240462	0.276303	120.415	179.155	153.177	150.575	283.09	200.997	181.489	222.762
SNX25	ENSG00000109762	83891	sorting nexin 25 [Source:HGNC Symbol;Acc:HGNC:21883]	protein_coding	248.225	0.880666	0.390421	0.0819673	0.15357	2.25569	0.0240903	0.27658	298.676	79.8934	163.621	158.287	379.233	230.555	327.448	348.088
FAS	ENSG00000026103	355	Fas cell surface death receptor [Source:HGNC Symbol;Acc:HGNC:11920]	protein_coding	133.749	-0.533592	0.236648	-0.184539	0.280248	-2.25479	0.0241463	0.276993	162.914	144.05	169.423	157.881	134.868	94.5866	95.0654	111.2
NGF	ENSG00000134259	4803	nerve growth factor [Source:HGNC Symbol;Acc:HGNC:7808]	protein_coding	3.9339	5.57974	2.47515	0.00699753	0.112678	2.2543	0.0241772	0.277119	0	0	0	0	8.01197	0	14.4039	9.05536
ABT1	ENSG00000146109	29777	activator of basal transcription 1 [Source:HGNC Symbol;Acc:HGNC:17369]	protein_coding	894.532	0.300844	0.133552	0.190272	0.141163	2.25264	0.0242822	0.2778	668.184	762.619	914.42	855.153	1001.5	1049.32	975.621	929.442
MRPL41	ENSG00000182154	64975	mitochondrial ribosomal protein L41 [Source:HGNC Symbol;Acc:HGNC:14492]	protein_coding	636.395	0.499936	0.221928	0.196147	0.271133	2.25269	0.0242786	0.2778	442.701	401.888	580.216	679.009	845.263	765.56	802.775	573.748
RASGRP2	ENSG00000068831	10235	RAS guanyl releasing protein 2 [Source:HGNC Symbol;Acc:HGNC:9879]	protein_coding	50.9054	-0.970487	0.430867	-0.0711788	0.142921	-2.2524	0.0242967	0.2778	43.6799	65.3673	82.3906	75.0847	26.7066	53.205	27.8475	32.9615
DOP1B	ENSG00000142197	9980	DOP1 leucine zipper like protein B [Source:HGNC Symbol;Acc:HGNC:1291]	protein_coding	110.692	1.04447	0.463996	0.0652133	0.138048	2.25103	0.0243835	0.278278	81.4571	47.2097	95.1553	66.1557	260.389	97.5424	79.7013	157.926
GAS7	ENSG00000007237	8522	growth arrest specific 7 [Source:HGNC Symbol;Acc:HGNC:4169]	protein_coding	58.8191	-1.17231	0.520796	-0.0565294	0.131514	-2.251	0.0243856	0.278278	83.8181	88.367	64.9841	88.884	12.018	38.4258	61.4564	32.5993
NCKIPSD	ENSG00000213672	51517	NCK interacting protein with SH3 domain [Source:HGNC Symbol;Acc:HGNC:15486]	protein_coding	554.538	-0.572298	0.254265	-0.164678	0.269646	-2.25079	0.0243987	0.278278	662.281	752.935	521.034	707.013	344.515	676.885	348.573	423.067
EYA3	ENSG00000158161	2140	EYA transcriptional coactivator and phosphatase 3 [Source:HGNC Symbol;Acc:HGNC:3521]	protein_coding	997.077	-0.321203	0.142802	-0.19533	0.153525	-2.24928	0.0244946	0.279142	1143.94	978.089	1167.39	1130.73	910.694	1046.36	722.113	877.283
BMPR1B	ENSG00000138696	658	bone morphogenetic protein receptor type 1B [Source:HGNC Symbol;Acc:HGNC:1077]	protein_coding	49.3382	1.72987	0.769942	0.0346238	0.119494	2.24675	0.0246559	0.279235	33.055	41.1572	2.32086	15.8287	84.1257	29.5583	91.2244	97.4357
DEPDC4	ENSG00000166153	120863	DEP domain containing 4 [Source:HGNC Symbol;Acc:HGNC:22952]	protein_coding	95.3201	0.978508	0.435775	0.070608	0.14256	2.24545	0.0247395	0.279235	72.0128	25.4206	98.6366	60.4736	141.545	133.012	101.787	129.673
EHBP1	ENSG00000115504	23301	EH domain binding protein 1 [Source:HGNC Symbol;Acc:HGNC:29144]	protein_coding	565.048	-0.38596	0.17174	-0.205131	0.194473	-2.24734	0.024618	0.279235	651.657	728.725	519.873	663.992	444.664	443.375	586.717	481.383
EMC6	ENSG00000127774	83460	ER membrane protein complex subunit 6 [Source:HGNC Symbol;Acc:HGNC:28430]	protein_coding	528.236	0.530667	0.236211	0.182935	0.278026	2.24658	0.0246667	0.279235	280.968	387.362	587.178	472.019	642.293	611.857	676.981	567.228
IGSF22	ENSG00000179057	283284	immunoglobulin superfamily member 22 [Source:HGNC Symbol;Acc:HGNC:26750]	protein_coding	4.85194	5.84974	2.6039	0.00626109	0.112617	2.24653	0.0246699	0.279235	0	0	0	0	6.67664	17.735	14.4039	0
MACROD1	ENSG00000133315	28992	mono-ADP ribosylhydrolase 1 [Source:HGNC Symbol;Acc:HGNC:29598]	protein_coding	455.991	0.419358	0.186519	0.207145	0.218351	2.24833	0.024555	0.279235	306.94	388.573	414.274	443.202	484.724	635.504	514.698	460.012
NDUFAF2	ENSG00000164182	91942	NADH:ubiquinone oxidoreductase complex assembly factor 2 [Source:HGNC Symbol;Acc:HGNC:28086]	protein_coding	719.876	0.834519	0.371256	0.0874799	0.159474	2.24783	0.0245873	0.279235	410.827	424.888	778.649	454.972	1419.45	886.749	381.222	1002.25
PHLDA2	ENSG00000181649	7262	pleckstrin homology like domain family A member 2 [Source:HGNC Symbol;Acc:HGNC:12385]	protein_coding	54.943	-0.957647	0.426498	-0.0736643	0.145323	-2.24537	0.0247444	0.279235	79.096	45.9992	92.8345	74.6788	41.3952	20.6908	46.0923	38.757
PIGBOS1	ENSG00000225973	101928527	PIGB opposite strand 1 [Source:HGNC Symbol;Acc:HGNC:50696]	protein_coding	54.1534	-0.977514	0.435233	-0.0707971	0.14264	-2.24595	0.024707	0.279235	35.4161	89.5775	89.3532	72.6495	36.0539	38.4258	35.5295	36.2214
PLEKHM3	ENSG00000178385	389072	pleckstrin homology domain containing M3 [Source:HGNC Symbol;Acc:HGNC:34006]	protein_coding	265.848	-0.987671	0.439858	-0.0688367	0.140965	-2.24543	0.0247406	0.279235	447.424	309.89	252.974	400.181	57.4191	277.848	225.66	155.39
TIGD5	ENSG00000179886	84948	tigger transposable element derived 5 [Source:HGNC Symbol;Acc:HGNC:18336]	protein_coding	258.939	-1.13739	0.506219	-0.0576895	0.132313	-2.24683	0.0246506	0.279235	509.992	384.941	116.043	413.98	81.4551	138.924	292.878	133.295
	ENSG00000284292		novel protein, ARPC1A and ARPC1B readthrough	protein_coding	8.87846	6.73692	2.99744	0.00463005	0.112504	2.24756	0.0246043	0.279235	0	0	0	0	61.4251	0	9.60257	0
IMPACT	ENSG00000154059	55364	impact RWD domain protein [Source:HGNC Symbol;Acc:HGNC:20387]	protein_coding	528.791	0.334502	0.149035	0.198461	0.161671	2.24445	0.0248035	0.279675	543.047	435.782	430.52	465.931	662.323	511.359	584.796	596.567
AEN	ENSG00000181026	64782	apoptosis enhancing nuclease [Source:HGNC Symbol;Acc:HGNC:25722]	protein_coding	1391.09	-0.32798	0.146218	-0.195763	0.157649	-2.24309	0.0248913	0.279967	1676.36	1721.34	1180.16	1617.77	1181.77	1182.33	1369.33	1199.65
DUS4L-BCAP29	ENSG00000288558	115253422	DUS4L-BCAP29 readthrough [Source:HGNC Symbol;Acc:HGNC:54422]	protein_coding	38.7312	-3.66107	1.63258	-0.0121462	0.11327	-2.2425	0.0249293	0.279967	1.18054	1.21051	172.904	112.018	1.33533	2.95583	18.2449	0
NDUFAF4	ENSG00000123545	29078	NADH:ubiquinone oxidoreductase complex assembly factor 4 [Source:HGNC Symbol;Acc:HGNC:21034]	protein_coding	461.985	0.474975	0.211716	0.201943	0.257949	2.24346	0.0248675	0.279967	410.827	416.414	343.488	375.423	686.359	532.05	379.301	552.015
RPF2	ENSG00000197498	84154	ribosome production factor 2 homolog [Source:HGNC Symbol;Acc:HGNC:20870]	protein_coding	1272.05	0.287563	0.128234	0.185285	0.134104	2.24248	0.0249303	0.279967	1108.52	1009.56	1314.77	1146.16	1528.95	1463.14	1208.96	1396.34
SMIM10L2A	ENSG00000178947	399668	small integral membrane protein 10 like 2A [Source:HGNC Symbol;Acc:HGNC:34499]	protein_coding	53.1278	-1.30888	0.583448	-0.0485881	0.1264	-2.24335	0.0248743	0.279967	29.5134	135.577	55.7007	81.5785	45.4012	29.5583	20.1654	27.5283
IFFO2	ENSG00000169991	126917	intermediate filament family orphan 2 [Source:HGNC Symbol;Acc:HGNC:27006]	protein_coding	146.86	1.18701	0.52947	0.0546935	0.130266	2.24188	0.0249691	0.280175	35.4161	198.523	51.059	74.6788	214.988	147.792	222.78	229.644
SLC5A11	ENSG00000158865	115584	solute carrier family 5 member 11 [Source:HGNC Symbol;Acc:HGNC:23091]	protein_coding	4.98124	-4.72163	2.10735	-0.00918942	0.112887	-2.24055	0.025055	0.280912	11.8054	0	10.4439	16.6404	0	0	0.960257	0
HILPDA	ENSG00000135245	29923	hypoxia inducible lipid droplet associated [Source:HGNC Symbol;Acc:HGNC:28859]	protein_coding	385.313	0.409799	0.183042	0.206757	0.212434	2.23882	0.0251675	0.28191	309.301	360.731	322.6	330.373	538.138	434.507	348.573	438.28
INSYN2B	ENSG00000204767	100131897	inhibitory synaptic factor family member 2B [Source:HGNC Symbol;Acc:HGNC:37271]	protein_coding	9.15436	6.76864	3.02366	0.00454302	0.112499	2.23856	0.0251847	0.28191	0	0	0	0	20.0299	53.205	0	0
TMEM134	ENSG00000172663	80194	transmembrane protein 134 [Source:HGNC Symbol;Acc:HGNC:26142]	protein_coding	261.757	0.462925	0.206846	0.200425	0.248147	2.23802	0.0252197	0.282074	184.164	188.839	263.418	239.865	279.084	348.788	312.084	277.819
C6orf47	ENSG00000204439	57827	chromosome 6 open reading frame 47 [Source:HGNC Symbol;Acc:HGNC:19076]	protein_coding	141.355	-0.616684	0.275662	-0.138322	0.22872	-2.2371	0.0252796	0.282516	155.831	225.154	125.327	176.956	121.515	118.233	96.9859	110.838
LRGUK	ENSG00000155530	136332	leucine rich repeats and guanylate kinase domain containing [Source:HGNC Symbol;Acc:HGNC:21964]	protein_coding	21.6433	3.79258	1.69591	0.0116629	0.113199	2.23631	0.0253312	0.282866	2.36107	8.47354	1.16043	0	84.1257	0	0.960257	76.065
GEMIN6	ENSG00000152147	79833	gem nuclear organelle associated protein 6 [Source:HGNC Symbol;Acc:HGNC:20044]	protein_coding	530.754	0.450807	0.201659	0.201347	0.240141	2.23549	0.0253852	0.283006	532.422	325.626	495.504	437.114	550.155	733.046	547.346	624.82
PSMA4	ENSG00000041357	5685	proteasome 20S subunit alpha 4 [Source:HGNC Symbol;Acc:HGNC:9533]	protein_coding	4932.8	0.270758	0.121117	0.179623	0.125083	2.2355	0.0253847	0.283006	3695.08	4253.72	5356.55	4578.95	5882.12	5255.47	5148.9	5291.59
ZNF281	ENSG00000162702	23528	zinc finger protein 281 [Source:HGNC Symbol;Acc:HGNC:13075]	protein_coding	642.753	0.415806	0.186027	0.203395	0.215907	2.23519	0.025405	0.283006	491.103	487.834	678.852	539.798	695.706	910.396	603.041	735.295
CBFB	ENSG00000067955	865	core-binding factor subunit beta [Source:HGNC Symbol;Acc:HGNC:1539]	protein_coding	664.633	0.838755	0.375322	0.107993	0.193776	2.23476	0.0254328	0.283088	548.95	406.73	536.119	414.792	275.078	1093.66	1098.53	943.207
PRRC2A	ENSG00000204469	7916	proline rich coiled-coil 2A [Source:HGNC Symbol;Acc:HGNC:13918]	protein_coding	4045.95	-0.180067	0.0806399	-0.140269	0.0792393	-2.23298	0.0255506	0.283735	4396.32	4557.56	3830.58	4412.95	3762.96	3635.67	4024.44	3747.11
SEMA3C	ENSG00000075223	10512	semaphorin 3C [Source:HGNC Symbol;Acc:HGNC:10725]	protein_coding	112.367	-0.793812	0.3555	-0.0919257	0.164078	-2.23295	0.0255523	0.283735	210.136	104.104	105.599	148.546	61.4251	100.498	89.3039	79.325
STARD7	ENSG00000084090	56910	StAR related lipid transfer domain containing 7 [Source:HGNC Symbol;Acc:HGNC:18063]	protein_coding	3085.08	-0.266946	0.119542	-0.176692	0.122882	-2.23308	0.025544	0.283735	3918.2	3155.79	2913.84	3497.32	2988.47	2474.03	2995.04	2737.98
TIMM10B	ENSG00000132286	26515	translocase of inner mitochondrial membrane 10B [Source:HGNC Symbol;Acc:HGNC:4022]	protein_coding	283.478	-0.52118	0.233467	-0.177775	0.265495	-2.23234	0.0255923	0.283951	384.855	372.836	228.605	347.419	253.712	257.157	196.853	226.384
UTF1	ENSG00000171794	8433	undifferentiated embryonic cell transcription factor 1 [Source:HGNC Symbol;Acc:HGNC:12634]	protein_coding	14.1609	-3.58651	1.60892	-0.0130101	0.113391	-2.22915	0.0258042	0.286074	1.18054	1.21051	67.305	34.4984	1.33533	2.95583	4.80128	0
TIMM17A	ENSG00000134375	10440	translocase of inner mitochondrial membrane 17A [Source:HGNC Symbol;Acc:HGNC:17315]	protein_coding	1266.4	0.524439	0.2356	0.177193	0.267493	2.22597	0.026016	0.288192	1206.51	1317.03	669.569	964.736	1129.69	1386.28	1843.69	1613.67
ARHGEF26	ENSG00000114790	26084	Rho guanine nucleotide exchange factor 26 [Source:HGNC Symbol;Acc:HGNC:24490]	protein_coding	282.035	-0.564196	0.253695	-0.154634	0.247456	-2.22391	0.0261542	0.289491	286.871	370.415	336.525	345.795	243.03	304.451	147.88	221.313
ERLIN1	ENSG00000107566	10613	ER lipid raft associated 1 [Source:HGNC Symbol;Acc:HGNC:16947]	protein_coding	845.065	-0.424429	0.190888	-0.200819	0.221719	-2.22344	0.026186	0.289612	1193.52	898.196	774.008	1013.85	750.455	564.564	869.033	696.901
HEATR3	ENSG00000155393	55027	HEAT repeat containing 3 [Source:HGNC Symbol;Acc:HGNC:26087]	protein_coding	749.208	0.231531	0.104171	0.163453	0.104787	2.22261	0.0262421	0.290001	632.768	668.2	751.959	702.955	815.886	803.986	818.139	799.77
ARPC3	ENSG00000111229	10094	actin related protein 2/3 complex subunit 3 [Source:HGNC Symbol;Acc:HGNC:706]	protein_coding	2025.41	0.29066	0.130806	0.184302	0.136839	2.22207	0.0262787	0.290175	1762.54	1447.77	2150.28	1923.79	2258.04	2278.95	2257.56	2124.39
BPTF	ENSG00000171634	2186	bromodomain PHD finger transcription factor [Source:HGNC Symbol;Acc:HGNC:3581]	protein_coding	1790.63	0.22509	0.101331	0.16167	0.101689	2.22133	0.0263285	0.290493	1858.17	1620.87	1452.86	1673.78	2045.72	1876.95	1871.54	1925.17
ATP11B	ENSG00000058063	23200	ATPase phospholipid transporting 11B (putative) [Source:HGNC Symbol;Acc:HGNC:13553]	protein_coding	476.112	-0.549104	0.247297	-0.160316	0.252294	-2.22042	0.0263904	0.290944	465.132	559.254	641.718	590.125	247.036	535.005	397.546	373.081
ALDH3A1	ENSG00000108602	218	aldehyde dehydrogenase 3 family member A1 [Source:HGNC Symbol;Acc:HGNC:405]	protein_coding	4.4048	-3.74187	1.68572	-0.0136576	0.113484	-2.21975	0.0264358	0.291007	7.08322	1.21051	10.4439	14.2052	1.33533	0	0.960257	0
HUS1	ENSG00000136273	3364	HUS1 checkpoint clamp component [Source:HGNC Symbol;Acc:HGNC:5309]	protein_coding	204.737	0.616421	0.277703	0.134184	0.221357	2.21972	0.026438	0.291007	232.566	122.261	134.61	155.851	209.647	295.583	232.382	254.999
METTL27	ENSG00000165171	155368	methyltransferase like 27 [Source:HGNC Symbol;Acc:HGNC:19068]	protein_coding	20.1797	-3.38197	1.52583	-0.0137056	0.113501	-2.21648	0.026659	0.293206	5.90269	1.21051	71.9467	67.7791	10.6826	2.95583	0.960257	0
EIF1	ENSG00000173812	10209	eukaryotic translation initiation factor 1 [Source:HGNC Symbol;Acc:HGNC:3249]	protein_coding	8080.54	-0.10943	0.0493876	-0.0955451	0.0478165	-2.21573	0.0267102	0.293305	8754.86	8180.6	8097.49	8516.22	7750.25	7691.07	7898.11	7755.74
PRDM7	ENSG00000126856	11105	PR/SET domain 7 [Source:HGNC Symbol;Acc:HGNC:9351]	protein_coding	4.95258	5.02479	2.26778	0.00797362	0.112755	2.21573	0.0267099	0.293305	0	1.21051	0	0	16.0239	11.8233	10.5628	0
FBN3	ENSG00000142449	84467	fibrillin 3 [Source:HGNC Symbol;Acc:HGNC:18794]	protein_coding	29.6107	3.64866	1.64928	0.0119619	0.113239	2.21227	0.0269477	0.295679	15.347	1.21051	1.16043	0	1.33533	124.145	0.960257	92.7269
KMT2D	ENSG00000167548	8085	lysine methyltransferase 2D [Source:HGNC Symbol;Acc:HGNC:7133]	protein_coding	1337.23	-0.230541	0.104245	-0.162506	0.104683	-2.21154	0.0269986	0.296003	1553.59	1395.71	1362.35	1472.88	1336.66	1072.97	1281.94	1221.75
ADAM32	ENSG00000197140	203102	ADAM metallopeptidase domain 32 [Source:HGNC Symbol;Acc:HGNC:15479]	protein_coding	5.28076	5.11826	2.31753	0.00762336	0.112722	2.2085	0.0272094	0.296912	0	1.21051	0	0	25.3712	11.8233	3.84103	0
DHPS	ENSG00000095059	1725	deoxyhypusine synthase [Source:HGNC Symbol;Acc:HGNC:2869]	protein_coding	55.433	2.25598	1.02197	0.0235323	0.115657	2.20749	0.0272796	0.296912	4.72215	2.42101	61.5028	8.52312	192.287	50.2491	20.1654	103.593
INO80D	ENSG00000114933	54891	INO80 complex subunit D [Source:HGNC Symbol;Acc:HGNC:25997]	protein_coding	276.896	0.362001	0.163989	0.197011	0.180845	2.20747	0.027281	0.296912	242.01	260.259	217.001	251.229	297.778	292.627	351.454	302.811
INPP5A	ENSG00000068383	3632	inositol polyphosphate-5-phosphatase A [Source:HGNC Symbol;Acc:HGNC:6076]	protein_coding	209.849	-1.18994	0.539102	-0.0519932	0.128361	-2.20726	0.0272956	0.296912	358.883	267.522	198.434	339.301	25.3712	218.731	168.045	102.507
LGALSL	ENSG00000119862	29094	galectin like [Source:HGNC Symbol;Acc:HGNC:25012]	protein_coding	361.063	-0.561446	0.254222	-0.151742	0.241308	-2.20849	0.02721	0.296912	450.965	514.465	304.033	457.002	301.784	203.952	374.5	281.803
TGFBRAP1	ENSG00000135966	9392	transforming growth factor beta receptor associated protein 1 [Source:HGNC Symbol;Acc:HGNC:16836]	protein_coding	479.684	-0.328714	0.148855	-0.191036	0.159733	-2.20829	0.0272243	0.296912	514.714	624.621	508.269	493.529	423.299	410.861	392.745	469.43
TPP1	ENSG00000166340	1200	tripeptidyl peptidase 1 [Source:HGNC Symbol;Acc:HGNC:2073]	protein_coding	824.984	-0.381068	0.172636	-0.197259	0.19343	-2.20735	0.0272897	0.296912	1080.19	951.458	719.467	974.071	702.383	860.147	620.326	691.83
WWC1	ENSG00000113645	23286	WW and C2 domain containing 1 [Source:HGNC Symbol;Acc:HGNC:29435]	protein_coding	405.609	-0.619939	0.280752	-0.12939	0.212937	-2.20814	0.0272348	0.296912	393.119	502.36	552.365	521.94	229.677	242.378	492.612	310.418
ZFP2	ENSG00000198939	80108	ZFP2 zinc finger protein [Source:HGNC Symbol;Acc:HGNC:26138]	protein_coding	4.71723	-5.53629	2.50541	-0.00661803	0.112644	-2.20974	0.0271235	0.296912	0	21.7891	5.80216	10.1466	0	0	0	0
ZNF280B	ENSG00000275004	140883	zinc finger protein 280B [Source:HGNC Symbol;Acc:HGNC:23022]	protein_coding	328.988	0.446364	0.202106	0.19461	0.235548	2.20856	0.0272053	0.296912	253.815	263.89	317.958	278.828	483.389	345.832	311.123	377.065
PCCA	ENSG00000175198	5095	propionyl-CoA carboxylase subunit alpha [Source:HGNC Symbol;Acc:HGNC:8653]	protein_coding	242.103	-0.969909	0.439788	-0.0674028	0.139491	-2.2054	0.0274259	0.298095	463.951	271.153	177.546	368.929	69.4371	186.217	255.428	144.161
OXCT2	ENSG00000198754	64064	3-oxoacid CoA-transferase 2 [Source:HGNC Symbol;Acc:HGNC:18606]	protein_coding	7.87921	3.72041	1.68791	0.0126078	0.113326	2.20415	0.0275137	0.298816	2.36107	1.21051	1.16043	0	32.0479	8.86749	0	17.3863
THUMPD3	ENSG00000134077	25917	THUMP domain containing 3 [Source:HGNC Symbol;Acc:HGNC:24493]	protein_coding	711.568	0.380073	0.172559	0.197049	0.19291	2.20257	0.0276251	0.29979	783.877	481.782	603.424	605.548	871.97	771.472	751.881	822.589
GNA12	ENSG00000146535	2768	G protein subunit alpha 12 [Source:HGNC Symbol;Acc:HGNC:4380]	protein_coding	479.337	0.393659	0.178811	0.196901	0.201817	2.20154	0.0276976	0.300144	494.645	424.888	334.204	403.022	452.676	591.166	575.194	558.897
ZNF786	ENSG00000197362	136051	zinc finger protein 786 [Source:HGNC Symbol;Acc:HGNC:21806]	protein_coding	113.619	-0.830128	0.377075	-0.0824259	0.153213	-2.2015	0.027701	0.300144	145.206	176.734	103.278	153.416	102.82	106.41	43.2116	77.8761
CRYGD	ENSG00000118231	1421	crystallin gamma D [Source:HGNC Symbol;Acc:HGNC:2411]	protein_coding	103.502	0.78231	0.355694	0.0904806	0.161985	2.19939	0.0278501	0.301191	69.6517	45.9992	91.6741	94.9719	113.503	147.792	162.283	102.144
RFWD3	ENSG00000168411	55159	ring finger and WD repeat domain 3 [Source:HGNC Symbol;Acc:HGNC:25539]	protein_coding	1298.41	-0.382008	0.173726	-0.197677	0.194785	-2.19891	0.0278844	0.301191	1279.7	1387.24	1710.48	1508.59	1187.11	830.589	1377.01	1106.57
SENP3	ENSG00000161956	26168	SUMO specific peptidase 3 [Source:HGNC Symbol;Acc:HGNC:17862]	protein_coding	372.334	0.537262	0.244315	0.159742	0.247818	2.19905	0.0278742	0.301191	225.483	418.835	277.343	291.41	424.635	532.05	354.335	454.579
TCAF2	ENSG00000170379	285966	TRPM8 channel associated factor 2 [Source:HGNC Symbol;Acc:HGNC:26878]	protein_coding	39.6353	-2.3185	1.05406	-0.0226749	0.115417	-2.19959	0.0278357	0.301191	106.248	79.8934	1.16043	77.114	6.67664	8.86749	31.6885	5.43322
FRMD5	ENSG00000171877	84978	FERM domain containing 5 [Source:HGNC Symbol;Acc:HGNC:28214]	protein_coding	87.8426	0.857969	0.390397	0.0796149	0.150504	2.19769	0.0279714	0.301426	97.9846	44.7887	49.8985	58.8501	128.192	73.8958	135.396	113.735
HLA-DMA	ENSG00000204257	3108	major histocompatibility complex, class II, DM alpha [Source:HGNC Symbol;Acc:HGNC:4934]	protein_coding	10.6494	3.07658	1.39965	0.0160133	0.113898	2.19811	0.0279414	0.301426	1.18054	2.42101	5.80216	0	1.33533	26.6025	13.4436	34.4104
MRPL42	ENSG00000198015	28977	mitochondrial ribosomal protein L42 [Source:HGNC Symbol;Acc:HGNC:14493]	protein_coding	1701.75	0.300622	0.136785	0.18499	0.143969	2.19777	0.0279658	0.301426	1442.62	1652.34	1551.5	1448.93	1945.57	2140.02	1461.51	1971.53
MROH6	ENSG00000204839	642475	maestro heat like repeat family member 6 [Source:HGNC Symbol;Acc:HGNC:27814]	protein_coding	10.1838	2.43252	1.10762	0.0222198	0.115278	2.19616	0.0280805	0.3021	2.36107	6.05253	4.64172	0.405863	22.7006	2.95583	24.9667	17.3863
STOML2	ENSG00000165283	30968	stomatin like 2 [Source:HGNC Symbol;Acc:HGNC:14559]	protein_coding	3593.26	0.317068	0.144391	0.187837	0.153562	2.1959	0.0280993	0.3021	2675.1	2966.95	3318.83	3832.56	4592.2	3863.27	4174.24	3322.96
ZBTB11	ENSG00000066422	27107	zinc finger and BTB domain containing 11 [Source:HGNC Symbol;Acc:HGNC:16740]	protein_coding	900.2	-0.399849	0.182082	-0.193862	0.20517	-2.19598	0.0280933	0.3021	1247.83	795.303	988.687	1060.11	882.652	845.368	628.968	752.682
DAPK1	ENSG00000196730	1612	death associated protein kinase 1 [Source:HGNC Symbol;Acc:HGNC:2674]	protein_coding	229.776	-1.58093	0.720269	-0.0361329	0.120049	-2.19492	0.0281697	0.302622	573.741	278.416	92.8345	430.215	13.3533	215.776	163.244	70.6318
ARHGAP1	ENSG00000175220	392	Rho GTPase activating protein 1 [Source:HGNC Symbol;Acc:HGNC:673]	protein_coding	396.613	-0.337826	0.153964	-0.191528	0.165988	-2.19418	0.0282223	0.302953	463.951	469.676	409.632	436.303	375.227	280.804	375.46	361.852
MED9	ENSG00000141026	55090	mediator complex subunit 9 [Source:HGNC Symbol;Acc:HGNC:25487]	protein_coding	423.733	-0.748958	0.341474	-0.0941204	0.16581	-2.19331	0.0282851	0.303392	531.242	231.207	794.895	568.614	361.874	271.936	334.169	295.929
ADCY6	ENSG00000174233	112	adenylate cyclase 6 [Source:HGNC Symbol;Acc:HGNC:237]	protein_coding	732.901	-0.79327	0.361929	-0.0873166	0.158428	-2.19178	0.0283952	0.303639	737.836	1527.66	410.793	1043.07	683.688	396.081	592.479	471.603
LSM7	ENSG00000130332	51690	LSM7 homolog, U6 small nuclear RNA and mRNA degradation associated [Source:HGNC Symbol;Acc:HGNC:20470]	protein_coding	1255.48	0.360151	0.164291	0.193581	0.180407	2.19216	0.0283682	0.303639	854.709	1074.93	1145.35	1315.81	1408.77	1516.34	1548.89	1179.01
MSL2	ENSG00000174579	55167	MSL complex subunit 2 [Source:HGNC Symbol;Acc:HGNC:25544]	protein_coding	493.508	-0.474682	0.216541	-0.172432	0.23409	-2.19212	0.028371	0.303639	576.102	577.412	553.526	596.213	503.419	257.157	481.089	403.145
NCKAP5L	ENSG00000167566	57701	NCK associated protein 5 like [Source:HGNC Symbol;Acc:HGNC:29321]	protein_coding	332.618	-0.422259	0.192656	-0.19226	0.219275	-2.19178	0.0283957	0.303639	362.425	459.992	309.835	393.281	328.491	254.201	269.832	282.89
SH3RF3	ENSG00000172985	344558	SH3 domain containing ring finger 3 [Source:HGNC Symbol;Acc:HGNC:24699]	protein_coding	61.7091	-2.1115	0.964223	-0.0253307	0.116164	-2.18985	0.0285353	0.304897	27.1524	127.103	123.006	125.006	4.00599	2.95583	73.9398	10.5042
PI4KB	ENSG00000143393	5298	phosphatidylinositol 4-kinase beta [Source:HGNC Symbol;Acc:HGNC:8984]	protein_coding	1563.3	-0.227489	0.103915	-0.15908	0.103934	-2.1892	0.0285826	0.305167	1578.38	1919.86	1520.16	1728.98	1482.21	1383.33	1466.31	1427.13
PPIE	ENSG00000084072	10450	peptidylprolyl isomerase E [Source:HGNC Symbol;Acc:HGNC:9258]	protein_coding	1082.49	0.264927	0.121057	0.173573	0.123986	2.18844	0.0286372	0.305515	1055.4	807.408	1050.19	1019.93	1231.17	1143.91	1202.24	1149.67
PPP2CA	ENSG00000113575	5515	protein phosphatase 2 catalytic subunit alpha [Source:HGNC Symbol;Acc:HGNC:9299]	protein_coding	1368.32	0.298514	0.136493	0.182872	0.142999	2.18703	0.0287401	0.306377	1036.51	1164.51	1493.47	1219.21	1535.63	1362.64	1604.59	1529.99
ITPRIPL1	ENSG00000198885	150771	ITPRIP like 1 [Source:HGNC Symbol;Acc:HGNC:29371]	protein_coding	377.584	-0.44546	0.203914	-0.186149	0.231392	-2.18454	0.0289224	0.307611	364.786	365.573	569.772	441.579	351.191	310.362	295.759	321.646
PYGO2	ENSG00000163348	90780	pygopus family PHD finger 2 [Source:HGNC Symbol;Acc:HGNC:30257]	protein_coding	754.281	-0.242957	0.111206	-0.164911	0.112243	-2.18476	0.0289067	0.307611	841.723	766.251	835.51	825.12	757.131	691.664	623.207	693.641
SMARCC2	ENSG00000139613	6601	SWI/SNF related, matrix associated, actin dependent regulator of chromatin subfamily c member 2 [Source:HGNC Symbol;Acc:HGNC:11105]	protein_coding	1219.44	-0.381687	0.174713	-0.191338	0.193542	-2.18465	0.0289147	0.307611	1330.47	1712.87	1024.66	1449.74	1213.81	1049.32	950.654	1023.98
NSMCE1	ENSG00000169189	197370	NSE1 homolog, SMC5-SMC6 complex component [Source:HGNC Symbol;Acc:HGNC:29897]	protein_coding	462.635	0.403789	0.185007	0.190949	0.207968	2.18256	0.0290679	0.308921	416.73	375.257	403.83	390.846	475.377	685.753	421.553	531.731
DCAF16	ENSG00000163257	54876	DDB1 and CUL4 associated factor 16 [Source:HGNC Symbol;Acc:HGNC:25987]	protein_coding	812.76	-0.457611	0.209706	-0.175134	0.228974	-2.18215	0.0290982	0.309007	761.446	1136.67	876.125	985.435	482.054	780.339	820.059	659.955
CDK11A	ENSG00000008128	728642	cyclin dependent kinase 11A [Source:HGNC Symbol;Acc:HGNC:1730]	protein_coding	59.3151	-1.20725	0.553509	-0.0501923	0.127167	-2.18108	0.0291778	0.309615	43.6799	133.156	62.6633	90.9133	58.7545	35.47	17.2846	32.5993
EXOC3	ENSG00000180104	11336	exocyst complex component 3 [Source:HGNC Symbol;Acc:HGNC:30378]	protein_coding	553.579	0.380751	0.174598	0.192127	0.193877	2.18073	0.0292035	0.309651	539.505	377.678	511.75	489.471	631.611	733.046	531.982	613.591
MAPK3	ENSG00000102882	5595	mitogen-activated protein kinase 3 [Source:HGNC Symbol;Acc:HGNC:6877]	protein_coding	1302.8	0.293169	0.134489	0.180773	0.140317	2.17988	0.0292665	0.309846	994.012	1130.61	1204.53	1348.28	1499.57	1427.67	1565.22	1252.54
MAT2B	ENSG00000038274	27430	methionine adenosyltransferase 2B [Source:HGNC Symbol;Acc:HGNC:6905]	protein_coding	842.713	-0.224641	0.103046	-0.157627	0.102939	-2.18001	0.0292568	0.309846	878.32	938.142	912.099	899.798	695.706	845.368	776.848	795.423
CILP2	ENSG00000160161	148113	cartilage intermediate layer protein 2 [Source:HGNC Symbol;Acc:HGNC:24213]	protein_coding	270.456	-1.13557	0.521591	-0.0534683	0.1292	-2.17713	0.0294709	0.31121	110.97	744.461	203.075	428.591	217.659	138.924	183.409	136.555
DCAF15	ENSG00000132017	90379	DDB1 and CUL4 associated factor 15 [Source:HGNC Symbol;Acc:HGNC:25095]	protein_coding	503.185	-0.48975	0.224939	-0.171007	0.243168	-2.17726	0.0294613	0.31121	518.256	719.041	503.627	616.506	456.682	283.76	517.578	410.027
SUV39H2	ENSG00000152455	79723	suppressor of variegation 3-9 homolog 2 [Source:HGNC Symbol;Acc:HGNC:17287]	protein_coding	797.55	-0.330413	0.151779	-0.185637	0.161789	-2.17694	0.0294852	0.31121	790.96	835.249	1029.3	902.234	620.928	659.15	837.344	705.232
TAMM41	ENSG00000144559	132001	TAM41 mitochondrial translocator assembly and maintenance homolog [Source:HGNC Symbol;Acc:HGNC:25187]	protein_coding	227.019	-0.544856	0.250224	-0.147851	0.230938	-2.17748	0.0294449	0.31121	239.649	234.838	326.081	272.74	130.862	239.422	191.091	181.469
E2F7	ENSG00000165891	144455	E2F transcription factor 7 [Source:HGNC Symbol;Acc:HGNC:23820]	protein_coding	345.516	-0.496821	0.228537	-0.168168	0.243228	-2.17392	0.0297108	0.313353	476.937	321.995	404.99	419.257	293.772	203.952	361.057	282.165
NIPSNAP3A	ENSG00000136783	25934	nipsnap homolog 3A [Source:HGNC Symbol;Acc:HGNC:23619]	protein_coding	452.327	0.437542	0.201443	0.184906	0.227003	2.17204	0.0298529	0.314388	339.995	315.942	497.825	380.7	556.832	576.387	431.155	519.778
SSBP2	ENSG00000145687	23635	single stranded DNA binding protein 2 [Source:HGNC Symbol;Acc:HGNC:15831]	protein_coding	86.406	0.684985	0.315368	0.10457	0.177737	2.17202	0.0298542	0.314388	49.5826	62.9463	81.2302	69.4026	121.515	124.145	83.5424	98.8846
UNC5CL	ENSG00000124602	222643	unc-5 family C-terminal like [Source:HGNC Symbol;Acc:HGNC:21203]	protein_coding	17.0223	-3.53797	1.62957	-0.012118	0.113241	-2.1711	0.0299235	0.314878	25.9718	1.21051	32.4921	63.7205	0	11.8233	0.960257	0
FNDC3B	ENSG00000075420	64778	fibronectin type III domain containing 3B [Source:HGNC Symbol;Acc:HGNC:24670]	protein_coding	239.568	0.736305	0.339268	0.0929632	0.163815	2.17027	0.0299862	0.315298	233.746	188.839	131.129	168.433	408.611	150.747	315.925	319.111
CCDC96	ENSG00000173013	257236	coiled-coil domain containing 96 [Source:HGNC Symbol;Acc:HGNC:26900]	protein_coding	13.1027	3.61102	1.66491	0.0121285	0.113255	2.1689	0.0300905	0.315864	1.18054	3.63152	3.48129	0	1.33533	0	52.8141	42.3791
CPNE1	ENSG00000214078	8904	copine 1 [Source:HGNC Symbol;Acc:HGNC:2314]	protein_coding	967.469	0.290697	0.134044	0.178531	0.139299	2.16866	0.0301083	0.315864	851.167	840.091	876.125	911.162	877.311	1123.22	1234.89	1025.79
ZFYVE26	ENSG00000072121	23503	zinc finger FYVE-type containing 26 [Source:HGNC Symbol;Acc:HGNC:20761]	protein_coding	523.213	-0.306849	0.141489	-0.181307	0.14839	-2.16871	0.0301048	0.315864	534.783	533.833	683.494	565.367	443.329	455.198	483.969	485.73
NENF	ENSG00000117691	29937	neudesin neurotrophic factor [Source:HGNC Symbol;Acc:HGNC:30384]	protein_coding	762.116	0.314432	0.14504	0.183458	0.153247	2.1679	0.030166	0.31623	571.38	651.252	715.986	769.922	838.586	936.998	865.191	747.611
SERPINB6	ENSG00000124570	5269	serpin family B member 6 [Source:HGNC Symbol;Acc:HGNC:8950]	protein_coding	880.702	-0.398323	0.183764	-0.187929	0.20452	-2.16758	0.0301907	0.316249	951.513	924.827	1078.04	1040.23	607.575	1037.5	667.379	738.555
HARBI1	ENSG00000180423	283254	harbinger transposase derived 1 [Source:HGNC Symbol;Acc:HGNC:26522]	protein_coding	83.0449	-0.755782	0.348753	-0.0911771	0.16207	-2.1671	0.0302274	0.316395	92.0819	108.946	113.722	105.93	53.4132	38.4258	90.2642	61.5765
GLB1L3	ENSG00000166105	112937	galactosidase beta 1 like 3 [Source:HGNC Symbol;Acc:HGNC:25147]	protein_coding	41.8085	-1.44029	0.665345	-0.0397065	0.121559	-2.16473	0.0304085	0.317811	14.1664	67.7884	96.3158	64.5322	13.3533	35.47	24.0064	18.8352
MAP1LC3B2	ENSG00000258102	643246	microtubule associated protein 1 light chain 3 beta 2 [Source:HGNC Symbol;Acc:HGNC:34390]	protein_coding	26.671	-2.7324	1.26221	-0.0176112	0.114208	-2.16477	0.0304057	0.317811	23.6107	1.21051	102.118	58.4443	16.0239	2.95583	8.64231	0.362214
OSGIN2	ENSG00000164823	734	oxidative stress induced growth inhibitor family member 2 [Source:HGNC Symbol;Acc:HGNC:1355]	protein_coding	314.86	0.784098	0.362328	0.0856102	0.15616	2.16405	0.0304603	0.318112	343.536	200.944	175.225	208.208	237.689	292.627	621.286	439.366
ABHD4	ENSG00000100439	63874	abhydrolase domain containing 4, N-acyl phospholipase B [Source:HGNC Symbol;Acc:HGNC:20154]	protein_coding	207.768	-0.610076	0.282097	-0.122483	0.200103	-2.16264	0.0305685	0.318284	267.982	305.048	169.423	264.217	142.88	135.968	217.978	158.65
ATG4A	ENSG00000101844	115201	autophagy related 4A cysteine peptidase [Source:HGNC Symbol;Acc:HGNC:16489]	protein_coding	385.144	0.422274	0.195212	0.184834	0.218155	2.16315	0.0305294	0.318284	318.745	330.468	317.958	344.984	526.12	496.58	326.487	419.807
FBXL12	ENSG00000127452	54850	F-box and leucine rich repeat protein 12 [Source:HGNC Symbol;Acc:HGNC:13611]	protein_coding	327.409	-0.547469	0.253137	-0.142245	0.222117	-2.16274	0.0305612	0.318284	441.521	341.363	371.338	407.081	312.467	156.659	328.408	260.432
HES4	ENSG00000188290	57801	hes family bHLH transcription factor 4 [Source:HGNC Symbol;Acc:HGNC:24149]	protein_coding	986.309	0.511455	0.236482	0.163833	0.246418	2.16277	0.0305592	0.318284	661.101	689.989	746.157	1149.81	1344.68	1208.93	1280.98	808.825
ATP2C1	ENSG00000017260	27032	ATPase secretory pathway Ca2+ transporting 1 [Source:HGNC Symbol;Acc:HGNC:13211]	protein_coding	1075.42	-0.259905	0.120247	-0.171654	0.122826	-2.16142	0.0306626	0.319024	1162.83	1323.08	995.65	1205.82	928.054	987.248	1036.12	964.577
CISD2	ENSG00000145354	493856	CDGSH iron sulfur domain 2 [Source:HGNC Symbol;Acc:HGNC:24212]	protein_coding	997.069	0.447135	0.20708	0.179444	0.229869	2.15923	0.030832	0.320499	772.071	700.883	1086.16	815.379	1434.14	1152.77	838.304	1176.83
MAML1	ENSG00000161021	9794	mastermind like transcriptional coactivator 1 [Source:HGNC Symbol;Acc:HGNC:13632]	protein_coding	904.59	0.278325	0.128914	0.174574	0.132733	2.15899	0.0308506	0.320499	871.236	855.828	692.777	848.66	1116.33	975.424	912.244	964.215
GADD45GIP1	ENSG00000179271	90480	GADD45G interacting protein 1 [Source:HGNC Symbol;Acc:HGNC:29996]	protein_coding	1583.76	0.478163	0.221667	0.169891	0.23789	2.15712	0.0309963	0.321225	1080.19	1025.3	1369.31	1813.4	2053.74	1944.94	2068.39	1314.84
HMGN4	ENSG00000182952	10473	high mobility group nucleosomal binding domain 4 [Source:HGNC Symbol;Acc:HGNC:4989]	protein_coding	1068.51	0.253983	0.117733	0.166762	0.119391	2.15728	0.0309839	0.321225	950.332	932.09	974.762	1028.05	1056.25	1380.37	1119.66	1106.57
LARP7	ENSG00000174720	51574	La ribonucleoprotein 7, transcriptional regulator [Source:HGNC Symbol;Acc:HGNC:24912]	protein_coding	1304.83	0.328086	0.15205	0.184197	0.16187	2.15775	0.0309471	0.321225	1044.78	992.615	1415.73	1168.89	1442.16	1675.96	1262.74	1435.82
RAD23A	ENSG00000179262	5886	RAD23 homolog A, nucleotide excision repair protein [Source:HGNC Symbol;Acc:HGNC:9812]	protein_coding	1412.88	-0.295979	0.137224	-0.176333	0.142328	-2.15691	0.0310131	0.321225	1444.98	1655.97	1517.84	1610.87	1026.87	1285.79	1514.33	1246.38
TRMT10C	ENSG00000174173	54931	tRNA methyltransferase 10C, mitochondrial RNase P subunit [Source:HGNC Symbol;Acc:HGNC:26022]	protein_coding	1357.79	0.346193	0.160559	0.185937	0.172752	2.15618	0.0310698	0.321572	995.193	1067.67	1536.41	1187.56	1595.72	1321.26	1620.91	1537.6
PLS1	ENSG00000120756	5357	plastin 1 [Source:HGNC Symbol;Acc:HGNC:9090]	protein_coding	597.785	0.320388	0.148646	0.1827	0.157024	2.15538	0.0311319	0.321975	546.589	491.466	560.488	534.116	777.161	535.005	670.259	667.199
GRHL1	ENSG00000134317	29841	grainyhead like transcription factor 1 [Source:HGNC Symbol;Acc:HGNC:17923]	protein_coding	62.3598	-0.738282	0.342947	-0.0907994	0.161051	-2.15276	0.0313378	0.323396	63.749	94.4195	75.428	76.7081	34.7185	59.1166	48.0128	46.7257
POLR2J3	ENSG00000285437	548644	RNA polymerase II subunit J3 [Source:HGNC Symbol;Acc:HGNC:33853]	protein_coding	213.193	-0.841106	0.390674	-0.0762752	0.146747	-2.15296	0.0313216	0.323396	227.844	361.941	205.396	299.933	73.4431	150.747	246.786	139.453
SEMA4B	ENSG00000185033	10509	semaphorin 4B [Source:HGNC Symbol;Acc:HGNC:10730]	protein_coding	186.904	-0.75504	0.350735	-0.0873152	0.157265	-2.15274	0.0313393	0.323396	262.079	294.153	129.968	255.694	146.886	88.6749	186.29	131.484
FAM162A	ENSG00000114023	26355	family with sequence similarity 162 member A [Source:HGNC Symbol;Acc:HGNC:17865]	protein_coding	1009.75	0.418816	0.194599	0.18384	0.216352	2.1522	0.0313814	0.32359	631.587	814.671	1166.23	845.819	1297.94	1064.1	1087.01	1170.68
NACA	ENSG00000196531	4666	nascent polypeptide associated complex subunit alpha [Source:HGNC Symbol;Acc:HGNC:7629]	protein_coding	11876.3	0.391187	0.181922	0.185524	0.200346	2.1503	0.0315317	0.324899	9032.29	8358.55	13918.2	9795.91	16639.5	12745.5	10528.3	13992.3
ARHGAP19	ENSG00000213390	84986	Rho GTPase activating protein 19 [Source:HGNC Symbol;Acc:HGNC:23724]	protein_coding	594.26	-0.349328	0.162547	-0.184115	0.174839	-2.1491	0.0316267	0.325254	566.658	721.462	692.777	675.356	547.485	608.901	423.473	517.967
MTA1	ENSG00000182979	9112	metastasis associated 1 [Source:HGNC Symbol;Acc:HGNC:7410]	protein_coding	1733.64	-0.201448	0.0937213	-0.146138	0.0922409	-2.14943	0.0316	0.325254	1681.08	2013.07	1868.29	1864.53	1610.41	1486.78	1720.78	1624.17
PQBP1	ENSG00000102103	10084	polyglutamine binding protein 1 [Source:HGNC Symbol;Acc:HGNC:9330]	protein_coding	542.555	0.394734	0.183685	0.185061	0.202051	2.14897	0.0316366	0.325254	390.758	547.149	479.258	463.496	714.401	469.977	649.134	626.269
SF3B5	ENSG00000169976	83443	splicing factor 3b subunit 5 [Source:HGNC Symbol;Acc:HGNC:21083]	protein_coding	2114.35	0.40649	0.189188	0.184168	0.209294	2.1486	0.0316661	0.325316	1310.4	1607.55	2113.15	2235.9	2677.33	2577.48	2448.66	1944.37
CNOT1	ENSG00000125107	23019	CCR4-NOT transcription complex subunit 1 [Source:HGNC Symbol;Acc:HGNC:7877]	protein_coding	4165.28	-0.217421	0.101206	-0.155104	0.100682	-2.1483	0.03169	0.325321	4553.33	4898.92	3842.19	4627.24	4031.36	3481.97	4108.94	3778.26
CAMTA1	ENSG00000171735	23261	calmodulin binding transcription activator 1 [Source:HGNC Symbol;Acc:HGNC:18806]	protein_coding	545.027	0.332348	0.154783	0.183295	0.164641	2.1472	0.0317777	0.325739	412.007	485.413	526.836	506.517	548.82	582.299	714.431	583.89
TDP2	ENSG00000111802	51567	tyrosyl-DNA phosphodiesterase 2 [Source:HGNC Symbol;Acc:HGNC:17768]	protein_coding	623.598	0.495325	0.230666	0.159791	0.233548	2.14736	0.0317643	0.325739	424.993	636.726	512.911	493.529	850.604	839.456	472.446	758.115
IGFBP6	ENSG00000167779	3489	insulin like growth factor binding protein 6 [Source:HGNC Symbol;Acc:HGNC:5475]	protein_coding	16.9337	3.45036	1.60765	0.0125168	0.11331	2.14622	0.0318558	0.326298	1.18054	2.42101	8.12302	0	46.7365	0	3.84103	73.1673
IL21R	ENSG00000103522	50615	interleukin 21 receptor [Source:HGNC Symbol;Acc:HGNC:6006]	protein_coding	7.58158	-3.91427	1.8254	-0.0110889	0.113108	-2.14434	0.0320059	0.327482	16.5275	15.7366	0	24.7576	2.67066	0	0.960257	0
	ENSG00000255330		novel protein	protein_coding	9.14379	-4.40069	2.05239	-0.00908825	0.112874	-2.14418	0.0320186	0.327482	8.26376	0	34.8129	27.1928	0	0	2.88077	0
DDX56	ENSG00000136271	54606	DEAD-box helicase 56 [Source:HGNC Symbol;Acc:HGNC:18193]	protein_coding	1347.29	-0.460122	0.214726	-0.169707	0.228773	-2.14283	0.0321264	0.32834	1325.74	1563.97	1723.24	1636.85	1204.47	712.355	1512.4	1099.32
FOXO3	ENSG00000118689	2309	forkhead box O3 [Source:HGNC Symbol;Acc:HGNC:3821]	protein_coding	427.246	-0.345288	0.161158	-0.179538	0.170993	-2.14254	0.0321498	0.32834	427.354	456.361	543.082	485.412	317.808	390.17	419.632	378.152
ITGA2B	ENSG00000005961	3674	integrin subunit alpha 2b [Source:HGNC Symbol;Acc:HGNC:6138]	protein_coding	174.433	-2.02751	0.946809	-0.0250365	0.116039	-2.14141	0.0322409	0.32867	40.1383	10.8946	724.109	343.766	88.1317	115.277	44.1718	28.9772
KLHL28	ENSG00000179454	54813	kelch like family member 28 [Source:HGNC Symbol;Acc:HGNC:19741]	protein_coding	251.814	0.434022	0.202695	0.178533	0.222422	2.14126	0.0322532	0.32867	243.191	180.365	221.642	214.296	256.383	257.157	349.534	291.945
ZNHIT1	ENSG00000106400	10467	zinc finger HIT-type containing 1 [Source:HGNC Symbol;Acc:HGNC:21688]	protein_coding	671.304	0.434236	0.202774	0.177341	0.222081	2.14147	0.0322359	0.32867	437.979	567.727	558.167	711.478	770.485	942.91	766.285	615.402
HSPB9	ENSG00000260325	94086	heat shock protein family B (small) member 9 [Source:HGNC Symbol;Acc:HGNC:30589]	protein_coding	4.5106	5.73351	2.68057	0.00584338	0.112583	2.13891	0.0324429	0.33036	0	0	0	0	6.67664	23.6466	5.76154	0
HOXA13	ENSG00000106031	3209	homeobox A13 [Source:HGNC Symbol;Acc:HGNC:5102]	protein_coding	179.977	1.46924	0.687254	0.03767	0.120647	2.13784	0.0325294	0.33091	18.8886	90.788	207.717	64.9381	413.952	266.025	68.1782	309.331
WIZ	ENSG00000011451	58525	WIZ zinc finger [Source:HGNC Symbol;Acc:HGNC:30917]	protein_coding	554.551	-0.738045	0.345259	-0.0879545	0.157745	-2.13766	0.0325446	0.33091	347.078	786.829	883.088	753.282	236.353	558.652	492.612	378.514
GNAO1	ENSG00000087258	2775	G protein subunit alpha o1 [Source:HGNC Symbol;Acc:HGNC:4389]	protein_coding	54.3695	1.22561	0.573453	0.0473664	0.125439	2.13724	0.0325783	0.33101	50.7631	18.1576	34.8129	28.0045	88.1317	23.6466	111.39	80.0494
FZD8	ENSG00000177283	8325	frizzled class receptor 8 [Source:HGNC Symbol;Acc:HGNC:4046]	protein_coding	1909.77	0.258732	0.121169	0.166562	0.122876	2.1353	0.0327366	0.332375	1554.77	1659.6	1746.45	1980.21	2029.7	2367.62	2107.76	1832.08
GABRB3	ENSG00000166206	2562	gamma-aminobutyric acid type A receptor subunit beta3 [Source:HGNC Symbol;Acc:HGNC:4083]	protein_coding	67.3883	0.967296	0.453215	0.0628471	0.135474	2.1343	0.0328183	0.33296	57.8463	19.3681	61.5028	43.0215	93.473	109.366	64.3372	90.1914
TSPAN10	ENSG00000182612	83882	tetraspanin 10 [Source:HGNC Symbol;Acc:HGNC:29942]	protein_coding	76.359	1.26951	0.594966	0.0452456	0.124309	2.13375	0.0328632	0.333172	60.2074	49.6308	33.6525	37.3394	76.1137	26.6025	204.535	122.791
SLC1A4	ENSG00000115902	6509	solute carrier family 1 member 4 [Source:HGNC Symbol;Acc:HGNC:10942]	protein_coding	276.504	-0.823908	0.386302	-0.0761261	0.14638	-2.13281	0.0329403	0.333467	147.567	515.676	362.055	384.758	202.97	271.936	145.959	181.107
UQCRC2	ENSG00000140740	7385	ubiquinol-cytochrome c reductase core protein 2 [Source:HGNC Symbol;Acc:HGNC:12586]	protein_coding	3313.83	0.219887	0.103096	0.154597	0.102472	2.13283	0.0329385	0.333467	2812.04	2798.69	3581.09	3059.8	3770.97	3337.13	3560.63	3590.27
GOLGA2	ENSG00000167110	2801	golgin A2 [Source:HGNC Symbol;Acc:HGNC:4425]	protein_coding	957.811	-0.400973	0.188091	-0.179284	0.204252	-2.1318	0.0330233	0.334062	1090.82	1340.03	783.291	1149.81	854.61	703.488	943.933	796.51
CDK2AP2	ENSG00000167797	10263	cyclin dependent kinase 2 associated protein 2 [Source:HGNC Symbol;Acc:HGNC:30833]	protein_coding	360.748	0.42953	0.201533	0.17513	0.218333	2.13131	0.0330635	0.334226	316.384	232.417	372.498	305.615	427.305	467.021	351.454	413.287
CAPZA1	ENSG00000116489	829	capping actin protein of muscle Z-line subunit alpha 1 [Source:HGNC Symbol;Acc:HGNC:1488]	protein_coding	2525.5	0.445256	0.208964	0.167474	0.219615	2.13078	0.0331072	0.334424	2396.49	1473.19	2664.35	2022.01	3625.42	2781.44	2180.74	3060.35
ALDH4A1	ENSG00000159423	8659	aldehyde dehydrogenase 4 family member A1 [Source:HGNC Symbol;Acc:HGNC:406]	protein_coding	153.707	0.520905	0.244644	0.1447	0.220577	2.12924	0.0332346	0.334506	118.054	122.261	136.931	126.223	130.862	212.82	203.574	178.934
DTWD1	ENSG00000104047	56986	DTW domain containing 1 [Source:HGNC Symbol;Acc:HGNC:30926]	protein_coding	197.847	0.497774	0.233697	0.154614	0.227991	2.13	0.0331716	0.334506	168.817	118.63	203.075	164.375	206.976	254.201	238.144	228.557
MZT2B	ENSG00000152082	80097	mitotic spindle organizing protein 2B [Source:HGNC Symbol;Acc:HGNC:25886]	protein_coding	1740.14	0.420259	0.197391	0.177736	0.215241	2.12907	0.0332484	0.334506	1254.91	1427.19	1297.36	1969.25	2203.29	1912.42	2367.99	1488.7
NUDT18	ENSG00000275074	79873	nudix hydrolase 18 [Source:HGNC Symbol;Acc:HGNC:26194]	protein_coding	142.985	0.775902	0.364486	0.0826078	0.152466	2.12876	0.0332743	0.334506	64.9295	130.735	127.647	99.4364	112.168	171.438	250.627	186.903
PGM2L1	ENSG00000165434	283209	phosphoglucomutase 2 like 1 [Source:HGNC Symbol;Acc:HGNC:20898]	protein_coding	160.605	-0.754378	0.354247	-0.0857742	0.15559	-2.12952	0.0332109	0.334506	162.914	266.311	164.781	214.296	189.617	79.8074	94.1052	113.011
PSMB9	ENSG00000240065	5698	proteasome 20S subunit beta 9 [Source:HGNC Symbol;Acc:HGNC:9546]	protein_coding	13.2095	1.93333	0.908247	0.0277156	0.116832	2.12864	0.0332842	0.334506	0	9.68405	6.96259	5.27622	26.7066	20.6908	18.2449	18.1107
ZDHHC8	ENSG00000099904	29801	zinc finger DHHC-type palmitoyltransferase 8 [Source:HGNC Symbol;Acc:HGNC:18474]	protein_coding	380.004	-0.426726	0.200415	-0.173516	0.215484	-2.12921	0.0332365	0.334506	416.73	351.047	524.515	446.449	263.06	387.214	329.368	321.646
LMBR1L	ENSG00000139636	55716	limb development membrane protein 1 like [Source:HGNC Symbol;Acc:HGNC:18268]	protein_coding	325.328	-0.666247	0.31316	-0.0990725	0.169091	-2.1275	0.0333787	0.33497	422.632	509.623	228.605	436.709	185.611	233.511	350.494	235.439
SLC2A4	ENSG00000181856	6517	solute carrier family 2 member 4 [Source:HGNC Symbol;Acc:HGNC:11009]	protein_coding	48.9205	-1.01706	0.478014	-0.0594573	0.13302	-2.12768	0.0333637	0.33497	56.6658	58.1043	81.2302	68.5909	26.7066	14.7792	53.7744	31.5127
GLS2	ENSG00000135423	27165	glutaminase 2 [Source:HGNC Symbol;Acc:HGNC:29570]	protein_coding	70.7184	-1.04199	0.490102	-0.0558404	0.130438	-2.12608	0.0334968	0.335912	66.1101	98.051	114.883	97.4071	41.3952	85.7191	20.1654	42.0169
BMERB1	ENSG00000166780	89927	bMERB domain containing 1 [Source:HGNC Symbol;Acc:HGNC:19213]	protein_coding	17.8723	-3.06395	1.44146	-0.0145056	0.113611	-2.12559	0.0335372	0.336024	1.18054	24.2101	26.6899	74.6788	9.3473	5.91166	0.960257	0
SIGIRR	ENSG00000185187	59307	single Ig and TIR domain containing [Source:HGNC Symbol;Acc:HGNC:30575]	protein_coding	347.307	0.763744	0.359348	0.0821512	0.151605	2.12536	0.0335564	0.336024	118.054	242.101	438.643	232.154	466.03	378.346	450.36	452.768
LHX2	ENSG00000106689	9355	LIM homeobox 2 [Source:HGNC Symbol;Acc:HGNC:6594]	protein_coding	28.8214	2.00165	0.942339	0.0256763	0.116214	2.12413	0.0336591	0.336809	1.18054	3.63152	35.9734	5.68208	46.7365	41.3816	41.291	54.6944
IFI6	ENSG00000126709	2537	interferon alpha inducible protein 6 [Source:HGNC Symbol;Acc:HGNC:4054]	protein_coding	93.1023	0.867481	0.408603	0.0712637	0.142092	2.12304	0.0337504	0.337237	60.2074	52.0518	90.5136	62.5029	186.946	65.0283	106.589	120.98
SSR4	ENSG00000180879	6748	signal sequence receptor subunit 4 [Source:HGNC Symbol;Acc:HGNC:11326]	protein_coding	3303.15	0.382381	0.180107	0.18044	0.194913	2.12308	0.0337474	0.337237	2293.78	2534.8	3033.37	3606.09	4015.33	3446.5	4554.5	2940.82
AP3S1	ENSG00000177879	1176	adaptor related protein complex 3 subunit sigma 1 [Source:HGNC Symbol;Acc:HGNC:2013]	protein_coding	770.012	0.326204	0.153955	0.179148	0.162418	2.11882	0.0341055	0.339074	658.74	543.517	756.601	767.487	858.616	928.131	880.556	766.446
GIN1	ENSG00000145723	54826	gypsy retrotransposon integrase 1 [Source:HGNC Symbol;Acc:HGNC:25959]	protein_coding	90.9522	1.26754	0.597813	0.0443759	0.123803	2.1203	0.033981	0.339074	22.4302	29.0522	118.364	43.8332	62.7605	150.747	158.442	141.988
IRX5	ENSG00000176842	10265	iroquois homeobox 5 [Source:HGNC Symbol;Acc:HGNC:14361]	protein_coding	29.3574	2.54542	1.20104	0.0185645	0.114398	2.11935	0.0340608	0.339074	15.347	18.1576	1.16043	0.405863	21.3653	5.91166	106.589	65.923
JTB	ENSG00000143543	10899	jumping translocation breakpoint [Source:HGNC Symbol;Acc:HGNC:6201]	protein_coding	489.364	-0.411585	0.194238	-0.174102	0.208132	-2.11898	0.0340925	0.339074	708.322	409.151	540.761	575.92	408.611	422.684	439.798	409.665
RPL22L1	ENSG00000163584	200916	ribosomal protein L22 like 1 [Source:HGNC Symbol;Acc:HGNC:27610]	protein_coding	2520.04	0.379507	0.179054	0.179222	0.19289	2.11951	0.0340477	0.339074	1767.26	1899.28	2974.18	2121.04	3263.54	2831.69	2395.84	2907.5
SGSM1	ENSG00000167037	129049	small G protein signaling modulator 1 [Source:HGNC Symbol;Acc:HGNC:29410]	protein_coding	89.9223	-1.75939	0.830048	-0.02969	0.117499	-2.11962	0.0340381	0.339074	44.8604	279.627	64.9841	167.216	12.018	14.7792	112.35	23.5439
UBE2T	ENSG00000077152	29089	ubiquitin conjugating enzyme E2 T [Source:HGNC Symbol;Acc:HGNC:25009]	protein_coding	1361.27	0.435534	0.205537	0.166077	0.214087	2.11901	0.0340899	0.339074	1047.14	912.722	1557.3	1115.72	1970.95	1250.32	1423.1	1612.94
ZFYVE1	ENSG00000165861	53349	zinc finger FYVE-type containing 1 [Source:HGNC Symbol;Acc:HGNC:13180]	protein_coding	242.833	-0.556183	0.262664	-0.127252	0.201013	-2.11747	0.03422	0.339969	318.745	337.731	194.952	300.745	212.317	239.422	150.76	187.989
KLHL18	ENSG00000114648	23276	kelch like family member 18 [Source:HGNC Symbol;Acc:HGNC:29120]	protein_coding	387.564	-0.88532	0.418197	-0.0688897	0.140188	-2.11699	0.0342605	0.340128	439.16	610.095	387.584	572.267	86.7964	378.346	390.825	235.439
RPL14	ENSG00000188846	9045	ribosomal protein L14 [Source:HGNC Symbol;Acc:HGNC:10305]	protein_coding	17048	0.307112	0.145142	0.175425	0.150997	2.11594	0.0343496	0.340768	12091.1	13354.3	18611	16900.9	21745.8	18290.7	18351.5	17038.6
ABITRAM	ENSG00000119328	54942	actin binding transcription modulator [Source:HGNC Symbol;Acc:HGNC:1364]	protein_coding	427.141	0.419163	0.198245	0.173587	0.212754	2.11437	0.0344841	0.341416	443.882	275.995	382.942	357.565	527.455	526.138	406.189	496.958
DAAM2	ENSG00000146122	23500	dishevelled associated activator of morphogenesis 2 [Source:HGNC Symbol;Acc:HGNC:18143]	protein_coding	107.729	0.566811	0.268027	0.124842	0.198873	2.11475	0.0344511	0.341416	106.248	77.4724	73.1072	88.0723	122.85	156.659	114.271	123.153
DNAJB9	ENSG00000128590	4189	DnaJ heat shock protein family (Hsp40) member B9 [Source:HGNC Symbol;Acc:HGNC:6968]	protein_coding	248.893	0.449803	0.212771	0.164571	0.220766	2.11402	0.0345133	0.341416	208.955	202.155	218.161	207.396	229.677	381.302	257.349	286.149
SCAMP3	ENSG00000116521	10067	secretory carrier membrane protein 3 [Source:HGNC Symbol;Acc:HGNC:10565]	protein_coding	1024.83	0.266142	0.12588	0.166283	0.127727	2.11425	0.0344942	0.341416	786.238	1008.35	938.789	982.189	1205.8	1188.24	1022.67	1066.36
DNPH1	ENSG00000112667	10591	2'-deoxynucleoside 5'-phosphate N-hydrolase 1 [Source:HGNC Symbol;Acc:HGNC:21218]	protein_coding	795.629	0.308409	0.145917	0.175123	0.151814	2.11359	0.03455	0.341535	591.449	663.357	796.056	784.939	916.036	963.601	849.827	799.77
ISOC2	ENSG00000063241	79763	isochorismatase domain containing 2 [Source:HGNC Symbol;Acc:HGNC:26278]	protein_coding	399.28	0.502894	0.238014	0.139623	0.207888	2.11288	0.0346114	0.341725	371.869	222.733	345.808	375.017	447.335	608.901	412.91	409.665
NDNF	ENSG00000173376	79625	neuron derived neurotrophic factor [Source:HGNC Symbol;Acc:HGNC:26256]	protein_coding	47.6808	-1.25672	0.594817	-0.0437438	0.123371	-2.11279	0.0346185	0.341725	61.3879	59.3148	70.7863	73.0553	10.6826	65.0283	17.2846	23.9062
ARL2BP	ENSG00000102931	23568	ADP ribosylation factor like GTPase 2 binding protein [Source:HGNC Symbol;Acc:HGNC:17146]	protein_coding	722.794	-0.391687	0.18549	-0.176041	0.199072	-2.11163	0.0347184	0.342226	624.504	962.353	845.954	842.166	656.982	733.046	507.016	610.331
UPF1	ENSG00000005007	5976	UPF1 RNA helicase and ATPase [Source:HGNC Symbol;Acc:HGNC:9962]	protein_coding	1493.95	-0.187336	0.0887163	-0.138119	0.086639	-2.11163	0.0347186	0.342226	1655.11	1476.82	1604.88	1619.39	1281.92	1486.78	1439.43	1387.28
SETD4	ENSG00000185917	54093	SET domain containing 4 [Source:HGNC Symbol;Acc:HGNC:1258]	protein_coding	365.362	0.37142	0.175935	0.178234	0.188225	2.11112	0.0347617	0.342407	306.94	392.204	262.257	314.95	436.653	384.258	406.189	419.444
FLT3LG	ENSG00000090554	2323	fms related receptor tyrosine kinase 3 ligand [Source:HGNC Symbol;Acc:HGNC:3766]	protein_coding	4.10736	-5.33933	2.53096	-0.00642122	0.112626	-2.10961	0.0348921	0.343448	11.8054	0	9.28345	11.77	0	0	0	0
TRIR	ENSG00000123144	79002	telomerase RNA component interacting RNase [Source:HGNC Symbol;Acc:HGNC:28424]	protein_coding	1318.68	0.423843	0.200981	0.170752	0.213447	2.10887	0.0349555	0.343828	1092	945.405	960.837	1500.07	1734.59	1575.46	1614.19	1126.85
RGS3	ENSG00000138835	5998	regulator of G protein signaling 3 [Source:HGNC Symbol;Acc:HGNC:9999]	protein_coding	44.6376	0.891525	0.422866	0.0682	0.139431	2.10829	0.0350056	0.344077	21.2497	38.7362	34.8129	31.2515	50.7425	44.3375	78.7411	57.2299
ATL3	ENSG00000184743	25923	atlastin GTPase 3 [Source:HGNC Symbol;Acc:HGNC:24526]	protein_coding	288.977	-0.786332	0.373956	-0.0780874	0.147789	-2.10274	0.0354883	0.344731	288.051	348.626	434.001	397.34	227.006	85.7191	338.01	193.06
CD151	ENSG00000177697	977	CD151 molecule (Raph blood group) [Source:HGNC Symbol;Acc:HGNC:1630]	protein_coding	1253.03	0.473566	0.225019	0.155506	0.221334	2.10456	0.0353294	0.344731	820.473	964.774	955.035	1451.37	1611.74	1433.58	1744.79	1042.45
CDCA7L	ENSG00000164649	55536	cell division cycle associated 7 like [Source:HGNC Symbol;Acc:HGNC:30777]	protein_coding	499.23	-0.737881	0.350498	-0.0854147	0.154929	-2.10523	0.0352709	0.344731	363.605	521.728	932.987	676.98	556.832	372.435	226.621	342.655
CHST10	ENSG00000115526	9486	carbohydrate sulfotransferase 10 [Source:HGNC Symbol;Acc:HGNC:19650]	protein_coding	398.635	-0.322566	0.153303	-0.175094	0.160022	-2.10411	0.0353688	0.344731	468.673	486.624	365.536	452.537	364.545	336.965	363.937	350.261
CYFIP2	ENSG00000055163	26999	cytoplasmic FMR1 interacting protein 2 [Source:HGNC Symbol;Acc:HGNC:13760]	protein_coding	704.123	0.310338	0.147449	0.174011	0.153271	2.10472	0.0353159	0.344731	642.212	691.199	561.649	614.071	767.814	910.396	649.134	796.51
FBXO41	ENSG00000163013	150726	F-box protein 41 [Source:HGNC Symbol;Acc:HGNC:29409]	protein_coding	224.318	0.517332	0.246012	0.137876	0.21009	2.10287	0.0354768	0.344731	226.663	180.365	147.375	181.827	305.79	295.583	193.972	262.968
MKS1	ENSG00000011143	54903	MKS transition zone complex subunit 1 [Source:HGNC Symbol;Acc:HGNC:7121]	protein_coding	474.59	0.40661	0.193107	0.173011	0.205848	2.10562	0.0352375	0.344731	468.673	478.15	293.589	392.875	559.503	543.873	496.453	563.606
NOL6	ENSG00000165271	65083	nucleolar protein 6 [Source:HGNC Symbol;Acc:HGNC:19910]	protein_coding	442.369	-0.778739	0.369815	-0.0796586	0.149396	-2.10575	0.0352258	0.344731	846.445	516.886	242.53	629.494	236.353	336.965	442.678	287.598
PHF23	ENSG00000040633	79142	PHD finger protein 23 [Source:HGNC Symbol;Acc:HGNC:28428]	protein_coding	604.546	0.302066	0.143509	0.172661	0.148355	2.10486	0.0353034	0.344731	445.063	616.148	553.526	547.915	627.605	724.179	661.617	660.317
PPFIA3	ENSG00000177380	8541	PTPRF interacting protein alpha 3 [Source:HGNC Symbol;Acc:HGNC:9247]	protein_coding	283.263	0.378562	0.179829	0.176182	0.191845	2.10513	0.0352803	0.344731	258.538	284.469	198.434	243.924	339.174	319.23	299.6	322.733
PSMD10	ENSG00000101843	5716	proteasome 26S subunit, non-ATPase 10 [Source:HGNC Symbol;Acc:HGNC:9555]	protein_coding	1440.39	0.285423	0.135743	0.169087	0.138829	2.10267	0.0354946	0.344731	1143.94	1238.35	1435.45	1371.82	1876.14	1578.41	1372.21	1506.81
RAD54L2	ENSG00000164080	23132	RAD54 like 2 [Source:HGNC Symbol;Acc:HGNC:29123]	protein_coding	1032.05	-0.354094	0.16837	-0.176513	0.178218	-2.10307	0.0354594	0.344731	1298.59	1187.51	935.307	1214.75	791.85	815.809	1133.1	879.457
SEPTIN1	ENSG00000180096	1731	septin 1 [Source:HGNC Symbol;Acc:HGNC:2879]	protein_coding	33.9675	1.11169	0.52855	0.051945	0.127986	2.10329	0.0354402	0.344731	20.0691	21.7891	24.3691	20.699	26.7066	32.5141	77.7808	47.8123
TRAPPC9	ENSG00000167632	83696	trafficking protein particle complex 9 [Source:HGNC Symbol;Acc:HGNC:30832]	protein_coding	83.6689	-1.47698	0.701797	-0.0364007	0.120041	-2.10457	0.0353292	0.344731	100.346	100.472	150.856	142.864	14.6886	11.8233	117.151	31.1504
VMA21	ENSG00000160131	203547	vacuolar ATPase assembly factor VMA21 [Source:HGNC Symbol;Acc:HGNC:22082]	protein_coding	931.671	0.297158	0.141036	0.171772	0.145356	2.10697	0.0351205	0.344731	852.348	674.252	978.243	835.672	1010.84	1111.39	964.098	1026.52
ZIC5	ENSG00000139800	85416	Zic family member 5 [Source:HGNC Symbol;Acc:HGNC:20322]	protein_coding	491.258	-0.309805	0.147192	-0.171642	0.152288	-2.10476	0.0353118	0.344731	519.436	558.043	534.959	553.191	392.587	537.961	398.507	435.382
ZNF493	ENSG00000196268	284443	zinc finger protein 493 [Source:HGNC Symbol;Acc:HGNC:23708]	protein_coding	100.271	-0.695444	0.330615	-0.0904495	0.159425	-2.10349	0.0354234	0.344731	113.332	129.524	120.685	127.035	60.0898	121.189	55.6949	74.6162
FAM217B	ENSG00000196227	63939	family with sequence similarity 217 member B [Source:HGNC Symbol;Acc:HGNC:16170]	protein_coding	391.671	0.316733	0.150723	0.174716	0.156941	2.10142	0.0356044	0.345375	309.301	351.047	349.29	383.135	486.06	416.772	437.877	399.885
METTL22	ENSG00000067365	79091	methyltransferase like 22 [Source:HGNC Symbol;Acc:HGNC:28368]	protein_coding	259.801	0.605555	0.288175	0.110778	0.182094	2.10134	0.0356108	0.345375	203.052	267.522	157.819	193.191	220.329	440.419	267.912	328.166
PRR29	ENSG00000224383	92340	proline rich 29 [Source:HGNC Symbol;Acc:HGNC:25673]	protein_coding	10.429	-4.56615	2.17346	-0.00751717	0.112692	-2.10087	0.0356522	0.345535	38.9577	0	8.12302	30.4397	0	5.91166	0	0
RFPL2	ENSG00000128253	10739	ret finger protein like 2 [Source:HGNC Symbol;Acc:HGNC:9979]	protein_coding	29.5339	1.49595	0.712468	0.0356588	0.119687	2.09968	0.0357571	0.34631	16.5275	10.8946	20.8878	12.5818	21.3653	94.5866	16.3244	43.1035
TMEM70	ENSG00000175606	54968	transmembrane protein 70 [Source:HGNC Symbol;Acc:HGNC:26050]	protein_coding	376.336	-0.385697	0.183733	-0.173895	0.195221	-2.09922	0.0357973	0.346457	443.882	481.782	337.685	439.956	371.221	334.009	282.316	319.835
NAA10	ENSG00000102030	8260	N-alpha-acetyltransferase 10, NatA catalytic subunit [Source:HGNC Symbol;Acc:HGNC:18704]	protein_coding	889.993	-0.318979	0.152015	-0.173266	0.157899	-2.09834	0.0358748	0.346886	1194.7	794.092	942.27	1023.18	809.209	733.046	842.145	781.297
ST7L	ENSG00000007341	54879	suppression of tumorigenicity 7 like [Source:HGNC Symbol;Acc:HGNC:18441]	protein_coding	269.568	-0.496265	0.236525	-0.144767	0.214566	-2.09815	0.0358916	0.346886	393.119	223.944	323.76	322.661	265.73	192.129	216.058	219.14
CDK5RAP2	ENSG00000136861	55755	CDK5 regulatory subunit associated protein 2 [Source:HGNC Symbol;Acc:HGNC:18672]	protein_coding	1269.63	-0.2282	0.10878	-0.153571	0.108035	-2.0978	0.0359224	0.346941	1338.73	1405.4	1319.41	1401.45	1068.26	1374.46	1092.77	1156.55
ZCCHC4	ENSG00000168228	29063	zinc finger CCHC-type containing 4 [Source:HGNC Symbol;Acc:HGNC:22917]	protein_coding	155.298	-0.645659	0.307889	-0.102239	0.172627	-2.09705	0.0359891	0.347344	172.358	186.418	211.198	192.785	132.198	65.0283	166.124	116.271
DPH5	ENSG00000117543	51611	diphthamide biosynthesis 5 [Source:HGNC Symbol;Acc:HGNC:24270]	protein_coding	800.348	0.329382	0.157176	0.174772	0.164443	2.09563	0.0361146	0.347896	548.95	775.935	807.66	704.578	973.455	889.705	805.656	896.843
MRPL48	ENSG00000175581	51642	mitochondrial ribosomal protein L48 [Source:HGNC Symbol;Acc:HGNC:16653]	protein_coding	628.983	0.295542	0.14101	0.170932	0.145005	2.09589	0.0360918	0.347896	657.559	499.939	544.242	558.062	765.143	673.929	629.929	703.058
RPL36AL	ENSG00000165502	6166	ribosomal protein L36a like [Source:HGNC Symbol;Acc:HGNC:10346]	protein_coding	3807.9	0.346789	0.165488	0.175802	0.174575	2.09556	0.0361216	0.347896	2721.14	2709.11	4227.45	3749.77	4847.24	4019.93	4375.89	3812.67
TEPSIN	ENSG00000167302	146705	TEPSIN adaptor related protein complex 4 accessory protein [Source:HGNC Symbol;Acc:HGNC:26458]	protein_coding	278.08	-0.719495	0.343441	-0.0868312	0.155992	-2.09496	0.0361748	0.348166	349.439	461.203	201.915	374.206	301.784	127.101	217.018	191.974
RPS28	ENSG00000233927	6234	ribosomal protein S28 [Source:HGNC Symbol;Acc:HGNC:10418]	protein_coding	6394.33	0.47723	0.227922	0.151976	0.218718	2.09384	0.0362746	0.348885	3680.91	4401.4	5871.78	7425.67	8526.07	7324.55	8748.9	5175.32
TAF4	ENSG00000130699	6874	TATA-box binding protein associated factor 4 [Source:HGNC Symbol;Acc:HGNC:11537]	protein_coding	325.92	-0.542165	0.259214	-0.12588	0.197131	-2.09157	0.0364771	0.35059	507.631	367.994	252.974	412.763	259.054	328.097	225.66	253.188
RASGRP3	ENSG00000152689	25780	RAS guanyl releasing protein 3 [Source:HGNC Symbol;Acc:HGNC:14545]	protein_coding	6.20624	3.82164	1.82786	0.0110865	0.113098	2.09077	0.0365488	0.350793	0	0	3.48129	0	1.33533	17.735	11.5231	15.5752
RETREG2	ENSG00000144567	79137	reticulophagy regulator family member 2 [Source:HGNC Symbol;Acc:HGNC:28450]	protein_coding	607.876	0.484902	0.231908	0.145982	0.213204	2.09092	0.036535	0.350793	365.967	434.572	736.874	489.471	622.263	730.09	755.722	728.051
DCAKD	ENSG00000172992	79877	dephospho-CoA kinase domain containing [Source:HGNC Symbol;Acc:HGNC:26238]	protein_coding	518.209	-0.700581	0.335167	-0.0885867	0.157455	-2.09025	0.0365955	0.350997	479.298	801.355	584.857	705.796	328.491	215.776	663.538	366.561
ACSL1	ENSG00000151726	2180	acyl-CoA synthetase long chain family member 1 [Source:HGNC Symbol;Acc:HGNC:3569]	protein_coding	353.107	0.838437	0.401187	0.0709702	0.141556	2.08989	0.0366278	0.351065	355.342	214.26	226.284	220.789	459.353	159.615	687.544	501.667
SNX5	ENSG00000089006	27131	sorting nexin 5 [Source:HGNC Symbol;Acc:HGNC:14969]	protein_coding	3635.85	0.225112	0.107761	0.152167	0.106691	2.089	0.0367081	0.351591	3238.21	3296.21	3564.84	3311.03	4521.42	3878.05	3295.6	3981.46
SRP9	ENSG00000143742	6726	signal recognition particle 9 [Source:HGNC Symbol;Acc:HGNC:11304]	protein_coding	6371.15	0.276992	0.13262	0.168256	0.135256	2.08862	0.036742	0.351673	4828.4	5357.7	7177.27	5682.49	7758.26	6845.7	6238.79	7080.57
SPTB	ENSG00000070182	6710	spectrin beta, erythrocytic [Source:HGNC Symbol;Acc:HGNC:11274]	protein_coding	186.972	-0.721306	0.345677	-0.0849796	0.153897	-2.08665	0.0369199	0.353132	166.456	221.523	294.749	245.953	194.958	159.615	77.7808	134.744
DGKH	ENSG00000102780	160851	diacylglycerol kinase eta [Source:HGNC Symbol;Acc:HGNC:2854]	protein_coding	328.426	0.40789	0.195596	0.16728	0.203737	2.08537	0.0370354	0.353993	367.147	231.207	254.134	277.204	384.575	369.479	362.977	380.687
EXT2	ENSG00000151348	2132	exostosin glycosyltransferase 2 [Source:HGNC Symbol;Acc:HGNC:3513]	protein_coding	879.422	-0.284143	0.136341	-0.166535	0.138645	-2.08406	0.0371549	0.354891	1149.84	915.143	849.436	954.996	829.239	703.488	820.059	813.172
VPS53	ENSG00000141252	55275	VPS53 subunit of GARP complex [Source:HGNC Symbol;Acc:HGNC:25608]	protein_coding	612.856	-1.00549	0.482851	-0.0555646	0.130122	-2.0824	0.0373059	0.356088	1205.33	543.517	555.846	961.084	166.916	895.617	255.428	319.111
ANKRD24	ENSG00000089847	170961	ankyrin repeat domain 24 [Source:HGNC Symbol;Acc:HGNC:29424]	protein_coding	42.3473	-3.52815	1.69577	-0.0108356	0.113067	-2.08056	0.0374741	0.356664	185.344	1.21051	1.16043	122.165	1.33533	26.6025	0.960257	0
GSTM1	ENSG00000134184	2944	glutathione S-transferase mu 1 [Source:HGNC Symbol;Acc:HGNC:4632]	protein_coding	135.072	-0.823491	0.395764	-0.0709642	0.141262	-2.08076	0.0374558	0.356664	257.357	167.05	76.5885	188.32	86.7964	109.366	105.628	89.467
HMGA1	ENSG00000137309	3159	high mobility group AT-hook 1 [Source:HGNC Symbol;Acc:HGNC:5010]	protein_coding	3179.76	0.421992	0.20278	0.164977	0.209825	2.08104	0.0374305	0.356664	2031.7	2586.85	2600.53	3647.49	3827.05	3582.47	4472.88	2689.08
PCDHGC3	ENSG00000240184	5098	protocadherin gamma subfamily C, 3 [Source:HGNC Symbol;Acc:HGNC:8716]	protein_coding	4.31925	5.6993	2.73961	0.00556384	0.112563	2.08033	0.0374949	0.356664	0	0	0	0	13.3533	2.95583	18.2449	0
RPL6	ENSG00000089009	6128	ribosomal protein L6 [Source:HGNC Symbol;Acc:HGNC:10362]	protein_coding	21402.8	0.231991	0.111507	0.155311	0.110907	2.08052	0.0374783	0.356664	17829.7	17786	23392	19735.1	26020.2	22476.1	20834.7	23148.8
CCDC124	ENSG00000007080	115098	coiled-coil domain containing 124 [Source:HGNC Symbol;Acc:HGNC:25171]	protein_coding	1365.11	0.346661	0.166717	0.170591	0.173339	2.07934	0.0375865	0.357291	984.568	1065.25	1325.21	1428.23	1530.29	1501.56	1799.52	1286.22
LOX	ENSG00000113083	4015	lysyl oxidase [Source:HGNC Symbol;Acc:HGNC:6664]	protein_coding	320.506	-0.671209	0.322861	-0.094031	0.163238	-2.07894	0.0376225	0.357388	458.048	361.941	336.525	422.503	180.269	162.571	412.91	229.282
FAM3C	ENSG00000196937	10447	FAM3 metabolism regulating signaling molecule C [Source:HGNC Symbol;Acc:HGNC:18664]	protein_coding	572.912	0.619684	0.298362	0.107518	0.17927	2.07695	0.037806	0.35864	504.089	367.994	523.354	413.98	377.898	611.857	1030.36	753.768
TMSB4X	ENSG00000205542	7114	thymosin beta 4 X-linked [Source:HGNC Symbol;Acc:HGNC:11881]	protein_coding	771.946	0.421655	0.202993	0.163473	0.20849	2.07719	0.037784	0.35864	597.352	482.992	888.89	669.268	992.149	892.661	788.371	863.882
TMEM184C	ENSG00000164168	55751	transmembrane protein 184C [Source:HGNC Symbol;Acc:HGNC:25587]	protein_coding	357.967	-0.575259	0.27712	-0.114895	0.185611	-2.07585	0.0379081	0.359363	590.269	367.994	291.268	461.06	213.653	348.788	319.766	270.936
GUK1	ENSG00000143774	2987	guanylate kinase 1 [Source:HGNC Symbol;Acc:HGNC:4693]	protein_coding	2372.13	0.4805	0.23155	0.139697	0.203566	2.07515	0.0379731	0.359421	1398.94	1720.13	2027.27	2771.23	3007.16	2763.7	3355.14	1933.5
SHMT2	ENSG00000182199	6472	serine hydroxymethyltransferase 2 [Source:HGNC Symbol;Acc:HGNC:10852]	protein_coding	2794.86	-0.274473	0.13228	-0.166488	0.134427	-2.07494	0.037992	0.359421	3096.55	3424.52	2511.17	3207.13	2191.27	2550.88	2925.9	2451.47
SPON1	ENSG00000262655	10418	spondin 1 [Source:HGNC Symbol;Acc:HGNC:11252]	protein_coding	99.8682	-1.52758	0.736016	-0.0334444	0.118786	-2.07547	0.0379433	0.359421	41.3188	182.786	189.15	179.391	120.18	41.3816	9.60257	35.1348
REEP2	ENSG00000132563	51308	receptor accessory protein 2 [Source:HGNC Symbol;Acc:HGNC:17975]	protein_coding	656.552	-0.352201	0.169791	-0.171142	0.177112	-2.07432	0.0380495	0.35972	698.878	899.406	582.536	765.458	543.479	555.696	646.253	560.708
HS3ST6	ENSG00000162040	64711	heparan sulfate-glucosamine 3-sulfotransferase 6 [Source:HGNC Symbol;Acc:HGNC:14178]	protein_coding	4.18801	5.62684	2.71354	0.00567161	0.11257	2.07362	0.0381147	0.360091	0	0	0	0	8.01197	20.6908	4.80128	0
TSTD3	ENSG00000279170	100130890	thiosulfate sulfurtransferase like domain containing 3 [Source:HGNC Symbol;Acc:HGNC:40910]	protein_coding	55.3515	1.75033	0.84442	0.0286457	0.117105	2.07282	0.0381887	0.360544	59.0269	27.8416	1.16043	14.2052	102.82	41.3816	93.1449	103.231
SLC30A3	ENSG00000115194	7781	solute carrier family 30 member 3 [Source:HGNC Symbol;Acc:HGNC:11014]	protein_coding	98.3928	-1.44708	0.698317	-0.035937	0.119792	-2.07225	0.0382424	0.360806	181.803	20.5786	208.878	165.998	57.4191	20.6908	94.1052	37.6703
COPS7A	ENSG00000111652	50813	COP9 signalosome subunit 7A [Source:HGNC Symbol;Acc:HGNC:16758]	protein_coding	576.462	0.298126	0.143908	0.167061	0.146831	2.07164	0.0382995	0.360853	573.741	481.782	503.627	511.793	543.479	623.68	725.954	647.64
TTI2	ENSG00000129696	80185	TELO2 interacting protein 2 [Source:HGNC Symbol;Acc:HGNC:26262]	protein_coding	283.004	-0.627714	0.302985	-0.10011	0.168898	-2.07177	0.0382872	0.360853	232.566	364.362	415.434	359.595	296.443	245.334	137.317	212.982
PPP1R9B	ENSG00000108819	84687	protein phosphatase 1 regulatory subunit 9B [Source:HGNC Symbol;Acc:HGNC:9298]	protein_coding	1157.74	0.219038	0.105926	0.148719	0.104309	2.06784	0.0386551	0.36371	1199.43	1032.56	952.714	1095.02	1309.96	1217.8	1224.33	1230.08
ZNF766	ENSG00000196214	90321	zinc finger protein 766 [Source:HGNC Symbol;Acc:HGNC:28063]	protein_coding	134.282	1.02793	0.497076	0.0536561	0.128882	2.06796	0.038644	0.36371	42.4993	114.998	119.524	75.0847	144.216	304.451	79.7013	193.785
IGSF1	ENSG00000147255	3547	immunoglobulin superfamily member 1 [Source:HGNC Symbol;Acc:HGNC:5948]	protein_coding	8.50006	2.62583	1.27029	0.0179385	0.11424	2.0671	0.0387245	0.364115	0	0	6.96259	2.43518	9.3473	17.735	19.2051	12.3153
ROBO3	ENSG00000154134	64221	roundabout guidance receptor 3 [Source:HGNC Symbol;Acc:HGNC:13433]	protein_coding	167.271	-0.986207	0.477648	-0.0563811	0.130593	-2.06471	0.0389501	0.365988	293.954	206.997	139.252	252.041	166.916	32.5141	152.681	93.8136
PARP4	ENSG00000102699	143	poly(ADP-ribose) polymerase family member 4 [Source:HGNC Symbol;Acc:HGNC:271]	protein_coding	517.912	-0.582054	0.282017	-0.110111	0.179344	-2.0639	0.0390276	0.366469	685.892	802.566	322.6	674.138	460.688	354.7	458.043	384.672
ATXN7L1	ENSG00000146776	222255	ataxin 7 like 1 [Source:HGNC Symbol;Acc:HGNC:22210]	protein_coding	80.9605	-1.47276	0.713755	-0.0347169	0.119273	-2.0634	0.0390747	0.366662	257.357	56.8938	19.7273	140.834	52.0778	56.1608	34.5692	30.0638
TNFAIP2	ENSG00000185215	7127	TNF alpha induced protein 2 [Source:HGNC Symbol;Acc:HGNC:11895]	protein_coding	16.4117	-3.41092	1.65387	-0.0118027	0.113195	-2.06239	0.0391707	0.367315	3.54161	59.3148	1.16043	56.0091	9.3473	0	1.92051	0
EIF1AD	ENSG00000175376	84285	eukaryotic translation initiation factor 1A domain containing [Source:HGNC Symbol;Acc:HGNC:28147]	protein_coding	375.666	-0.464478	0.225469	-0.144118	0.205204	-2.06005	0.0393941	0.368662	486.381	335.31	473.456	449.696	252.377	286.716	413.871	307.52
ELK4	ENSG00000158711	2005	ETS transcription factor ELK4 [Source:HGNC Symbol;Acc:HGNC:3326]	protein_coding	687.207	-0.21039	0.102126	-0.144833	0.10006	-2.0601	0.0393894	0.368662	763.808	739.619	742.676	707.419	620.928	635.504	610.723	676.979
TIGD1	ENSG00000221944	200765	tigger transposable element derived 1 [Source:HGNC Symbol;Acc:HGNC:14523]	protein_coding	199.142	-0.747624	0.362867	-0.0778132	0.146733	-2.06033	0.0393673	0.368662	286.871	301.416	140.412	271.117	229.677	103.454	122.913	137.279
MLXIPL	ENSG00000009950	51085	MLX interacting protein like [Source:HGNC Symbol;Acc:HGNC:12744]	protein_coding	139.731	0.865041	0.420038	0.0653991	0.136839	2.05943	0.0394527	0.368867	109.79	118.63	76.5885	88.884	133.533	310.362	90.2642	189.8
PYCR1	ENSG00000183010	5831	pyrroline-5-carboxylate reductase 1 [Source:HGNC Symbol;Acc:HGNC:9721]	protein_coding	3198.37	0.471175	0.228839	0.144118	0.20776	2.05898	0.0394958	0.368867	2260.73	2467.01	2188.57	3798.47	3259.54	4410.1	4610.19	2592.37
SLC35D1	ENSG00000116704	23169	solute carrier family 35 member D1 [Source:HGNC Symbol;Acc:HGNC:20800]	protein_coding	344.488	0.55656	0.270292	0.117259	0.187128	2.05911	0.039484	0.368867	362.425	206.997	284.306	263.405	280.419	390.17	536.784	431.397
KLF7	ENSG00000118263	8609	Kruppel like factor 7 [Source:HGNC Symbol;Acc:HGNC:6350]	protein_coding	153.532	0.751557	0.365215	0.0782387	0.147381	2.05785	0.0396046	0.369634	148.748	96.8405	105.599	105.93	92.1377	245.334	230.462	203.202
TIMP3	ENSG00000100234	7078	TIMP metallopeptidase inhibitor 3 [Source:HGNC Symbol;Acc:HGNC:11822]	protein_coding	804.504	-0.309209	0.150597	-0.166193	0.153686	-2.05321	0.0400519	0.373557	1014.08	919.985	698.58	930.238	690.365	688.709	790.291	703.783
TRAPPC13	ENSG00000113597	80006	trafficking protein particle complex 13 [Source:HGNC Symbol;Acc:HGNC:25828]	protein_coding	453.798	0.535146	0.260703	0.120981	0.18968	2.0527	0.0401013	0.373766	264.44	445.466	420.076	352.695	710.395	511.359	367.778	558.173
FECH	ENSG00000066926	2235	ferrochelatase [Source:HGNC Symbol;Acc:HGNC:3647]	protein_coding	373.907	-0.379268	0.184801	-0.165791	0.190116	-2.0523	0.0401406	0.373881	415.549	444.256	402.67	434.273	403.269	242.378	326.487	322.371
TP73	ENSG00000078900	7161	tumor protein p73 [Source:HGNC Symbol;Acc:HGNC:12003]	protein_coding	164.891	-0.743152	0.362191	-0.0784682	0.14737	-2.05183	0.0401866	0.374059	232.566	140.419	237.888	217.948	92.1377	82.7633	198.773	116.633
KATNA1	ENSG00000186625	11104	katanin catalytic subunit A1 [Source:HGNC Symbol;Acc:HGNC:6216]	protein_coding	483.931	-0.607296	0.296155	-0.104137	0.173525	-2.0506	0.0403057	0.374685	338.814	694.831	683.494	621.376	551.491	301.495	315.925	364.026
TUBA8	ENSG00000183785	51807	tubulin alpha 8 [Source:HGNC Symbol;Acc:HGNC:12410]	protein_coding	9.15836	-5.52555	2.69463	-0.00516277	0.112522	-2.05058	0.0403079	0.374685	43.6799	26.6311	0	0	0	2.95583	0	0
EBLN2	ENSG00000255423	55096	endogenous Bornavirus like nucleoprotein 2 [Source:HGNC Symbol;Acc:HGNC:25493]	protein_coding	14.9367	-3.50947	1.71275	-0.0112624	0.113123	-2.04903	0.0404595	0.374743	59.0269	1.21051	1.16043	48.7036	2.67066	0	6.7218	0
PRKCH	ENSG00000027075	5583	protein kinase C eta [Source:HGNC Symbol;Acc:HGNC:9403]	protein_coding	96.9334	-0.978937	0.477882	-0.0545585	0.129191	-2.04849	0.0405119	0.374743	109.79	87.1565	175.225	137.993	29.3772	121.189	55.6949	59.041
SAMD10	ENSG00000130590	140700	sterile alpha motif domain containing 10 [Source:HGNC Symbol;Acc:HGNC:16129]	protein_coding	27.6225	-3.34828	1.63466	-0.011673	0.113177	-2.0483	0.0405303	0.374743	1.18054	119.84	1.16043	79.1433	1.33533	2.95583	15.3641	0
SIK2	ENSG00000170145	23235	salt inducible kinase 2 [Source:HGNC Symbol;Acc:HGNC:21680]	protein_coding	559.019	-0.528474	0.257914	-0.122614	0.19124	-2.04904	0.0404585	0.374743	570.199	935.721	422.397	709.854	391.251	532.05	481.089	429.586
ST6GALNAC5	ENSG00000117069	81849	ST6 N-acetylgalactosaminide alpha-2,6-sialyltransferase 5 [Source:HGNC Symbol;Acc:HGNC:19342]	protein_coding	11.5274	-3.46292	1.68942	-0.0115877	0.113159	-2.04976	0.0403874	0.374743	4.72215	31.4732	0	47.8918	1.33533	2.95583	3.84103	0
STX10	ENSG00000104915	8677	syntaxin 10 [Source:HGNC Symbol;Acc:HGNC:11428]	protein_coding	607.407	0.364521	0.177924	0.165446	0.182912	2.04875	0.0404865	0.374743	586.727	470.887	444.445	613.259	687.694	821.721	640.491	594.032
SYTL2	ENSG00000137501	54843	synaptotagmin like 2 [Source:HGNC Symbol;Acc:HGNC:15585]	protein_coding	25.3267	1.80666	0.881429	0.0271822	0.116607	2.04969	0.0403943	0.374743	31.8745	4.84203	2.32086	6.49381	21.3653	35.47	55.6949	44.5524
UBFD1	ENSG00000103353	56061	ubiquitin family domain containing 1 [Source:HGNC Symbol;Acc:HGNC:30565]	protein_coding	787.622	-0.336695	0.164366	-0.163638	0.167215	-2.04845	0.0405156	0.374743	1063.66	669.41	872.644	907.916	730.425	724.179	651.054	681.688
HDHD5	ENSG00000069998	27440	haloacid dehalogenase like hydrolase domain containing 5 [Source:HGNC Symbol;Acc:HGNC:1843]	protein_coding	936.157	0.253487	0.123773	0.157	0.123303	2.04799	0.0405612	0.374779	786.238	947.826	768.205	914.409	1092.3	945.866	1071.65	962.766
ARL1	ENSG00000120805	400	ADP ribosylation factor like GTPase 1 [Source:HGNC Symbol;Acc:HGNC:692]	protein_coding	931.779	0.318546	0.155629	0.164868	0.158629	2.04682	0.0406754	0.375584	710.683	786.829	995.65	819.843	1092.3	1149.82	858.47	1040.64
MAP3K14	ENSG00000006062	9020	mitogen-activated protein kinase kinase kinase 14 [Source:HGNC Symbol;Acc:HGNC:6853]	protein_coding	75.6155	0.830435	0.406093	0.0679109	0.138606	2.04494	0.0408609	0.377046	46.041	41.1572	77.7489	52.3563	132.198	100.498	58.5757	96.3491
UXT	ENSG00000126756	8409	ubiquitously expressed prefoldin like chaperone [Source:HGNC Symbol;Acc:HGNC:12641]	protein_coding	681.251	0.283867	0.138845	0.162533	0.14022	2.04448	0.0409058	0.377209	530.061	673.042	583.697	662.368	761.137	842.412	700.027	697.263
RRP1B	ENSG00000160208	23076	ribosomal RNA processing 1B [Source:HGNC Symbol;Acc:HGNC:23818]	protein_coding	2543.43	-0.228266	0.111722	-0.149809	0.110079	-2.04316	0.0410364	0.378162	3017.45	2634.06	2478.68	2842.66	2021.69	2471.07	2590.77	2291.01
CDC45	ENSG00000093009	8318	cell division cycle 45 [Source:HGNC Symbol;Acc:HGNC:1739]	protein_coding	988.969	-0.20052	0.0983059	-0.13904	0.0955993	-2.03976	0.0413746	0.381025	971.582	1133.03	1096.61	1031.7	877.311	931.087	911.284	959.144
SLBP	ENSG00000163950	7884	stem-loop binding protein [Source:HGNC Symbol;Acc:HGNC:10904]	protein_coding	1230.64	0.316646	0.1553	0.164965	0.158354	2.03893	0.0414566	0.381527	1135.68	1194.77	994.489	1053.21	1336.66	1655.27	1056.28	1418.79
SPAG5	ENSG00000076382	10615	sperm associated antigen 5 [Source:HGNC Symbol;Acc:HGNC:13452]	protein_coding	1483.89	-0.369106	0.181111	-0.157498	0.180575	-2.03802	0.0415483	0.382118	1205.33	1590.61	2171.17	1718.83	1224.5	1466.09	1227.21	1267.39
SPX	ENSG00000134548	80763	spexin hormone [Source:HGNC Symbol;Acc:HGNC:28139]	protein_coding	28.0545	2.07289	1.01761	0.0224332	0.115262	2.03701	0.0416489	0.382789	8.26376	30.2627	0	4.87036	21.3653	65.0283	43.2116	51.4345
IRX6	ENSG00000159387	79190	iroquois homeobox 6 [Source:HGNC Symbol;Acc:HGNC:14675]	protein_coding	14.579	3.03448	1.49119	0.0135768	0.113447	2.03494	0.0418567	0.383936	1.18054	3.63152	8.12302	0	5.34132	53.205	0.960257	44.1902
KIF24	ENSG00000186638	347240	kinesin family member 24 [Source:HGNC Symbol;Acc:HGNC:19916]	protein_coding	223.986	-1.13774	0.559077	-0.0454314	0.124083	-2.03502	0.0418484	0.383936	289.232	410.362	163.621	362.842	85.461	325.141	48.0128	107.215
TMEM14B	ENSG00000137210	81853	transmembrane protein 14B [Source:HGNC Symbol;Acc:HGNC:21384]	protein_coding	893.258	0.349943	0.171943	0.163342	0.17503	2.03523	0.0418274	0.383936	639.851	694.831	902.815	898.987	1172.42	1025.67	935.29	876.197
ITPRIP	ENSG00000148841	85450	inositol 1,4,5-trisphosphate receptor interacting protein [Source:HGNC Symbol;Acc:HGNC:29370]	protein_coding	174.273	0.487678	0.239701	0.132194	0.197304	2.03452	0.0418988	0.384068	167.636	147.682	119.524	142.458	166.916	260.113	186.29	203.565
SFI1	ENSG00000198089	9814	SFI1 centrin binding protein [Source:HGNC Symbol;Acc:HGNC:29064]	protein_coding	399.373	-0.743923	0.36571	-0.0749976	0.143918	-2.03418	0.041933	0.384127	711.864	403.099	320.279	560.903	153.563	446.33	334.169	264.779
PIGZ	ENSG00000119227	80235	phosphatidylinositol glycan anchor biosynthesis class Z [Source:HGNC Symbol;Acc:HGNC:30596]	protein_coding	13.5536	-3.51222	1.72721	-0.0110567	0.11309	-2.03346	0.0420062	0.384544	0	2.42101	42.936	53.9798	1.33533	2.95583	4.80128	0
BEGAIN	ENSG00000183092	57596	brain enriched guanylate kinase associated [Source:HGNC Symbol;Acc:HGNC:24163]	protein_coding	37.5805	-1.56555	0.770363	-0.0310526	0.117831	-2.03222	0.0421313	0.384763	66.1101	18.1576	74.2676	63.3146	4.00599	44.3375	16.3244	14.1264
CALM1	ENSG00000198668	801	calmodulin 1 [Source:HGNC Symbol;Acc:HGNC:1442]	protein_coding	3694.72	0.241598	0.118851	0.15217	0.117344	2.03279	0.0420742	0.384763	3026.9	3004.48	4135.78	3378.4	3791	3960.81	4234.73	4025.65
LRCH3	ENSG00000186001	84859	leucine rich repeats and calponin homology domain containing 3 [Source:HGNC Symbol;Acc:HGNC:28637]	protein_coding	494.023	0.632742	0.311296	0.093482	0.161024	2.0326	0.0420925	0.384763	338.814	478.15	378.301	351.883	669	812.854	284.236	638.946
PPFIA1	ENSG00000131626	8500	PTPRF interacting protein alpha 1 [Source:HGNC Symbol;Acc:HGNC:9245]	protein_coding	975.874	-0.428257	0.210772	-0.148185	0.198806	-2.03185	0.0421689	0.384763	1263.17	1191.14	832.029	1196.08	691.7	709.399	1130.22	793.25
RPAIN	ENSG00000129197	84268	RPA interacting protein [Source:HGNC Symbol;Acc:HGNC:28641]	protein_coding	764.762	0.399274	0.196495	0.156736	0.194995	2.03198	0.0421553	0.384763	458.048	853.407	693.938	634.77	815.886	845.368	915.125	901.552
BCR	ENSG00000186716	613	BCR activator of RhoGEF and GTPase [Source:HGNC Symbol;Acc:HGNC:1014]	protein_coding	904.055	0.261116	0.128542	0.157449	0.128161	2.03136	0.0422187	0.384944	774.432	811.039	811.141	891.681	897.341	966.557	1160.95	919.3
GCLC	ENSG00000001084	2729	glutamate-cysteine ligase catalytic subunit [Source:HGNC Symbol;Acc:HGNC:4311]	protein_coding	275.338	0.693276	0.341411	0.08315	0.151291	2.03062	0.0422932	0.384944	277.426	267.522	105.599	190.35	327.156	419.728	245.826	369.097
HMGN1	ENSG00000205581	3150	high mobility group nucleosome binding domain 1 [Source:HGNC Symbol;Acc:HGNC:4984]	protein_coding	5970.29	0.169302	0.0833996	0.126727	0.0804625	2.03001	0.0423551	0.384944	5213.25	5470.28	5655.94	6120.01	6320.11	6931.42	6208.06	5843.24
MBTPS2	ENSG00000012174	51360	membrane bound transcription factor peptidase, site 2 [Source:HGNC Symbol;Acc:HGNC:15455]	protein_coding	549.156	0.62636	0.308572	0.0946421	0.162186	2.02987	0.0423701	0.384944	489.923	424.888	418.916	390.846	317.808	990.203	645.293	715.374
PPP1R14B	ENSG00000173457	26472	protein phosphatase 1 regulatory inhibitor subunit 14B [Source:HGNC Symbol;Acc:HGNC:9057]	protein_coding	1754.45	0.285441	0.140576	0.162069	0.141734	2.03051	0.0423042	0.384944	1329.28	1436.87	1708.15	1843.43	1986.97	2004.05	2072.23	1654.6
PTRH2	ENSG00000141378	51651	peptidyl-tRNA hydrolase 2 [Source:HGNC Symbol;Acc:HGNC:24265]	protein_coding	622.647	0.723086	0.356032	0.0787096	0.147326	2.03096	0.042259	0.384944	717.767	271.153	480.418	411.139	1172.42	614.813	459.003	854.464
RFTN2	ENSG00000162944	130132	raftlin family member 2 [Source:HGNC Symbol;Acc:HGNC:26402]	protein_coding	8.09479	3.38788	1.66912	0.0119883	0.113211	2.02974	0.0423829	0.384944	2.36107	2.42101	1.16043	0	0	20.6908	4.80128	33.3237
LRRC24	ENSG00000254402	441381	leucine rich repeat containing 24 [Source:HGNC Symbol;Acc:HGNC:28947]	protein_coding	37.7712	1.05784	0.521272	0.0503779	0.126771	2.02935	0.042423	0.385055	33.055	14.5261	26.6899	23.5401	72.1078	53.205	26.8872	52.1589
ZNF7	ENSG00000147789	7553	zinc finger protein 7 [Source:HGNC Symbol;Acc:HGNC:13139]	protein_coding	293.326	-0.539734	0.266069	-0.114817	0.181864	-2.02855	0.0425044	0.385542	351.8	428.519	243.691	367.712	325.82	192.129	208.376	228.557
PSMC2	ENSG00000161057	5701	proteasome 26S subunit, ATPase 2 [Source:HGNC Symbol;Acc:HGNC:9548]	protein_coding	1184.59	0.366052	0.180567	0.161631	0.182913	2.02723	0.0426385	0.386477	761.446	968.405	1252.11	1157.52	1524.95	1211.89	1405.82	1194.58
SOD1	ENSG00000142168	6647	superoxide dismutase 1 [Source:HGNC Symbol;Acc:HGNC:11179]	protein_coding	7142.79	0.294223	0.145153	0.156576	0.144544	2.02699	0.0426633	0.386477	5063.32	5685.75	7827.11	7088.8	8835.87	7537.37	7963.41	7140.7
MYEF2	ENSG00000104177	50804	myelin expression factor 2 [Source:HGNC Symbol;Acc:HGNC:17940]	protein_coding	288.912	-0.507901	0.250668	-0.121367	0.186325	-2.02619	0.0427455	0.386751	279.787	280.837	442.124	349.448	185.611	310.362	229.501	233.628
TPPP3	ENSG00000159713	51673	tubulin polymerization promoting protein family member 3 [Source:HGNC Symbol;Acc:HGNC:24162]	protein_coding	74.8536	0.910172	0.449248	0.0591938	0.132187	2.02599	0.042766	0.386751	23.6107	75.0514	59.182	49.1094	69.4371	135.968	94.1052	92.3647
ULBP3	ENSG00000131019	79465	UL16 binding protein 3 [Source:HGNC Symbol;Acc:HGNC:14895]	protein_coding	184.985	0.817371	0.403465	0.0677665	0.138415	2.02588	0.0427772	0.386751	70.8322	128.314	215.84	122.165	341.844	159.615	189.171	252.101
RPL18A	ENSG00000105640	6142	ribosomal protein L18a [Source:HGNC Symbol;Acc:HGNC:10311]	protein_coding	12554.4	0.485761	0.239873	0.130003	0.19416	2.02508	0.0428595	0.386991	7296.9	8181.81	11480.1	14879.3	17216.4	13292.4	18153.7	9934.46
SYNE3	ENSG00000176438	161176	spectrin repeat containing nuclear envelope family member 3 [Source:HGNC Symbol;Acc:HGNC:19861]	protein_coding	210.882	0.788591	0.389411	0.0703215	0.140323	2.02509	0.0428585	0.386991	266.801	71.4199	143.893	136.37	216.323	304.451	265.991	281.803
ATG2A	ENSG00000110046	23130	autophagy related 2A [Source:HGNC Symbol;Acc:HGNC:29028]	protein_coding	307.473	-0.555656	0.274531	-0.108795	0.17537	-2.02401	0.0429687	0.387717	415.549	452.729	203.075	392.064	261.724	245.334	253.508	235.802
SLC41A2	ENSG00000136052	84102	solute carrier family 41 member 2 [Source:HGNC Symbol;Acc:HGNC:31045]	protein_coding	116.754	0.758064	0.374584	0.0741932	0.143453	2.02375	0.0429958	0.387717	70.8322	136.787	60.3424	81.1726	133.533	103.454	193.972	153.941
SNTA1	ENSG00000101400	6640	syntrophin alpha 1 [Source:HGNC Symbol;Acc:HGNC:11167]	protein_coding	799.485	0.681277	0.336759	0.0847326	0.152772	2.02304	0.043069	0.388125	358.883	527.781	559.328	1006.13	1131.02	1061.14	1184	567.59
FBXO38	ENSG00000145868	81545	F-box protein 38 [Source:HGNC Symbol;Acc:HGNC:28844]	protein_coding	277.261	-0.612905	0.303128	-0.0959146	0.163001	-2.02193	0.0431834	0.388903	352.981	175.523	460.691	350.666	206.976	236.466	224.7	210.084
RANBP6	ENSG00000137040	26953	RAN binding protein 6 [Source:HGNC Symbol;Acc:HGNC:9851]	protein_coding	391.844	0.279678	0.138345	0.159109	0.138343	2.0216	0.043218	0.388962	361.244	361.941	328.402	366.494	415.287	399.037	481.089	421.255
AGAP1	ENSG00000157985	116987	ArfGAP with GTPase domain, ankyrin repeat and PH domain 1 [Source:HGNC Symbol;Acc:HGNC:16922]	protein_coding	485.293	-0.37111	0.183616	-0.159227	0.184059	-2.02112	0.0432676	0.389156	572.561	496.308	557.007	566.991	340.509	387.214	541.585	420.169
SDCCAG8	ENSG00000054282	10806	SHH signaling and ciliogenesis regulator SDCCAG8 [Source:HGNC Symbol;Acc:HGNC:10671]	protein_coding	289.85	0.446116	0.220783	0.142395	0.199113	2.02061	0.0433197	0.389372	221.941	273.574	249.493	241.894	375.227	224.643	390.825	341.206
ZYG11B	ENSG00000162378	79699	zyg-11 family member B, cell cycle regulator [Source:HGNC Symbol;Acc:HGNC:25820]	protein_coding	583.096	-0.366262	0.181321	-0.159223	0.181895	-2.01996	0.0433875	0.389729	615.06	824.355	501.306	687.126	520.778	481.8	537.744	496.596
EXD2	ENSG00000081177	55218	exonuclease 3'-5' domain containing 2 [Source:HGNC Symbol;Acc:HGNC:20217]	protein_coding	625.207	-0.291462	0.144379	-0.162564	0.145834	-2.01872	0.0435159	0.390629	649.295	606.464	805.339	691.591	622.263	546.829	513.737	566.141
SGTA	ENSG00000104969	6449	small glutamine rich tetratricopeptide repeat containing alpha [Source:HGNC Symbol;Acc:HGNC:10819]	protein_coding	1541.77	0.283026	0.140265	0.15933	0.140494	2.0178	0.0436122	0.391241	1310.4	1114.88	1684.95	1453.4	1725.24	1634.57	1782.24	1628.52
CFDP1	ENSG00000153774	10428	craniofacial development protein 1 [Source:HGNC Symbol;Acc:HGNC:1873]	protein_coding	920.997	0.474812	0.23544	0.130231	0.191998	2.0167	0.0437267	0.392014	564.297	1096.72	704.382	722.842	1123.01	777.384	1238.73	1140.61
MCM7	ENSG00000166508	4176	minichromosome maintenance complex component 7 [Source:HGNC Symbol;Acc:HGNC:6950]	protein_coding	4629.33	-0.179311	0.0889271	-0.130653	0.0859059	-2.01639	0.0437597	0.392056	4683.19	5345.6	4554.69	5070.04	3964.59	4776.62	4373.01	4266.89
F8A1	ENSG00000288722	8263	coagulation factor VIII associated 1 [Source:HGNC Symbol;Acc:HGNC:3547]	protein_coding	124.915	0.639552	0.317457	0.0905766	0.157834	2.01461	0.0439456	0.393467	70.8322	142.84	83.551	94.5661	184.275	130.057	136.356	156.839
PCGF3	ENSG00000185619	10336	polycomb group ring finger 3 [Source:HGNC Symbol;Acc:HGNC:10066]	protein_coding	659.902	0.289906	0.144073	0.159527	0.144418	2.01221	0.0441974	0.395467	659.92	526.57	595.301	592.966	835.916	712.355	627.048	729.138
FLT1	ENSG00000102755	2321	fms related receptor tyrosine kinase 1 [Source:HGNC Symbol;Acc:HGNC:3763]	protein_coding	34.298	-1.10841	0.551002	-0.0467334	0.124685	-2.01163	0.0442594	0.395497	75.5544	37.5257	26.6899	48.2977	32.0479	14.7792	19.2051	20.284
PIM2	ENSG00000102096	11040	Pim-2 proto-oncogene, serine/threonine kinase [Source:HGNC Symbol;Acc:HGNC:8987]	protein_coding	246.189	0.362923	0.180436	0.158483	0.180276	2.01137	0.0442863	0.395497	250.274	220.312	178.706	213.89	281.754	260.113	285.196	279.267
RPS9	ENSG00000170889	6203	ribosomal protein S9 [Source:HGNC Symbol;Acc:HGNC:10442]	protein_coding	10890.7	0.328143	0.163107	0.161836	0.164678	2.01183	0.0442379	0.395497	7669.95	8238.71	10763	11951.4	13153	12080.5	13584.8	9684.17
GPLD1	ENSG00000112293	2822	glycosylphosphatidylinositol specific phospholipase D1 [Source:HGNC Symbol;Acc:HGNC:4459]	protein_coding	42.1894	1.19588	0.594753	0.0424165	0.122524	2.01071	0.0443557	0.395671	34.2356	33.8942	12.7647	21.9166	21.3653	67.9841	84.5026	60.852
ZNF232	ENSG00000167840	7775	zinc finger protein 232 [Source:HGNC Symbol;Acc:HGNC:13026]	protein_coding	130.116	0.536387	0.266774	0.112845	0.17894	2.01065	0.0443629	0.395671	108.609	110.156	102.118	104.713	110.832	153.703	196.853	153.941
KBTBD2	ENSG00000170852	25948	kelch repeat and BTB domain containing 2 [Source:HGNC Symbol;Acc:HGNC:21751]	protein_coding	345.539	-0.489479	0.24354	-0.124101	0.187239	-2.00985	0.0444472	0.396169	513.534	383.731	286.626	426.156	228.341	357.656	294.799	273.472
VWCE	ENSG00000167992	220001	von Willebrand factor C and EGF domains [Source:HGNC Symbol;Acc:HGNC:26487]	protein_coding	27.1413	1.89931	0.945146	0.0244583	0.115782	2.00954	0.0444796	0.396203	0	30.2627	6.96259	8.92899	45.4012	38.4258	45.1321	42.0169
BOC	ENSG00000144857	91653	BOC cell adhesion associated, oncogene regulated [Source:HGNC Symbol;Acc:HGNC:17173]	protein_coding	125.006	0.574087	0.285741	0.102318	0.168636	2.00912	0.0445247	0.396349	76.7349	95.63	127.647	99.4364	150.892	186.217	117.151	146.335
CA12	ENSG00000074410	771	carbonic anhydrase 12 [Source:HGNC Symbol;Acc:HGNC:1371]	protein_coding	125.925	0.964508	0.48024	0.0542201	0.128957	2.00839	0.0446022	0.396785	157.011	43.5782	73.1072	68.5909	229.677	135.968	96.9859	202.478
EBP	ENSG00000147155	10682	EBP cholestenol delta-isomerase [Source:HGNC Symbol;Acc:HGNC:3133]	protein_coding	446.082	0.642353	0.320078	0.0892231	0.156553	2.00686	0.0447641	0.39783	355.342	319.574	401.509	319.414	892	351.744	349.534	579.543
SENP3-EIF4A1	ENSG00000277957		SENP3-EIF4A1 readthrough (NMD candidate) [Source:HGNC Symbol;Acc:HGNC:49182]	protein_coding	5.95112	6.16748	3.07338	0.00434703	0.112486	2.00674	0.044777	0.39783	0	0	0	0	0	0	34.5692	13.0397
MAP2K5	ENSG00000137764	5607	mitogen-activated protein kinase kinase 5 [Source:HGNC Symbol;Acc:HGNC:6845]	protein_coding	206.889	0.780843	0.389311	0.0694462	0.13944	2.0057	0.044888	0.398561	84.9987	105.314	279.664	138.805	245.701	286.716	237.183	276.732
POLR2H	ENSG00000163882	5437	RNA polymerase II, I and III subunit H [Source:HGNC Symbol;Acc:HGNC:9195]	protein_coding	637.499	0.309127	0.154202	0.160876	0.155163	2.00469	0.0449966	0.39904	489.923	516.886	671.89	600.677	733.096	635.504	776.848	675.168
WDR70	ENSG00000082068	55100	WD repeat domain 70 [Source:HGNC Symbol;Acc:HGNC:25495]	protein_coding	537.644	0.293714	0.146516	0.158129	0.146395	2.00466	0.0449996	0.39904	518.256	446.677	466.493	496.37	494.072	668.018	632.809	578.457
EIF2A	ENSG00000144895	83939	eukaryotic translation initiation factor 2A [Source:HGNC Symbol;Acc:HGNC:3254]	protein_coding	1574.96	0.352194	0.17582	0.158279	0.175777	2.00315	0.0451612	0.400218	1722.4	1032.56	1458.66	1318.65	1806.7	1962.67	1449.99	1848.02
HMGXB3	ENSG00000113716	22993	HMG-box containing 3 [Source:HGNC Symbol;Acc:HGNC:28982]	protein_coding	848.99	-0.393577	0.196519	-0.151816	0.190381	-2.00274	0.0452052	0.400275	1045.96	1099.14	681.173	1024.8	598.227	871.97	770.126	700.523
UBA52	ENSG00000221983	7311	ubiquitin A-52 residue ribosomal protein fusion product 1 [Source:HGNC Symbol;Acc:HGNC:12458]	protein_coding	7893.87	0.322814	0.161201	0.16283	0.163565	2.00255	0.0452254	0.400275	5450.54	6121.53	8033.66	8446.42	9992.27	8498.01	9374.03	7234.51
LPIN2	ENSG00000101577	9663	lipin 2 [Source:HGNC Symbol;Acc:HGNC:14450]	protein_coding	259.886	-0.34802	0.173973	-0.15642	0.172859	-2.00042	0.0454545	0.402046	289.232	283.258	293.589	292.627	232.347	268.981	190.131	228.92
LENG1	ENSG00000105617	79165	leukocyte receptor cluster member 1 [Source:HGNC Symbol;Acc:HGNC:15502]	protein_coding	189.316	0.554594	0.277482	0.104689	0.170093	1.99867	0.0456442	0.402658	141.664	102.893	218.161	150.981	205.641	224.643	241.985	228.557
MAMDC4	ENSG00000177943	158056	MAM domain containing 4 [Source:HGNC Symbol;Acc:HGNC:24083]	protein_coding	23.3477	-3.20192	1.6023	-0.0119196	0.113202	-1.99833	0.0456807	0.402658	41.3188	41.1572	1.16043	84.8254	17.3593	0	0.960257	0
MRPS7	ENSG00000125445	51081	mitochondrial ribosomal protein S7 [Source:HGNC Symbol;Acc:HGNC:14499]	protein_coding	1253.7	0.277432	0.138824	0.155098	0.137699	1.99844	0.0456691	0.402658	1024.71	1030.14	1217.29	1250.87	1499.57	1560.68	1197.44	1248.92
OST4	ENSG00000228474	100128731	oligosaccharyltransferase complex subunit 4, non-catalytic [Source:HGNC Symbol;Acc:HGNC:32483]	protein_coding	1806.4	0.357845	0.17902	0.159903	0.180143	1.99891	0.0456176	0.402658	1204.15	1424.77	1761.53	1935.56	2298.1	2205.05	1974.29	1647.71
SNX11	ENSG00000002919	29916	sorting nexin 11 [Source:HGNC Symbol;Acc:HGNC:14975]	protein_coding	466.941	-0.430264	0.215329	-0.137774	0.18969	-1.99817	0.0456979	0.402658	701.239	467.255	409.632	565.773	345.85	401.993	460.923	382.861
ZCRB1	ENSG00000139168	85437	zinc finger CCHC-type and RNA binding motif containing 1 [Source:HGNC Symbol;Acc:HGNC:29620]	protein_coding	1379.37	0.369648	0.184946	0.153752	0.181276	1.99868	0.0456429	0.402658	1096.72	890.933	1618.8	1206.22	1666.49	1619.8	1396.21	1539.77
PATL1	ENSG00000166889	219988	PAT1 homolog 1, processing body mRNA decay factor [Source:HGNC Symbol;Acc:HGNC:26721]	protein_coding	817.775	-0.367319	0.183883	-0.15431	0.180558	-1.99757	0.0457633	0.402979	1154.57	742.04	828.548	961.49	863.958	635.504	663.538	692.554
CACNB4	ENSG00000182389	785	calcium voltage-gated channel auxiliary subunit beta 4 [Source:HGNC Symbol;Acc:HGNC:1404]	protein_coding	170.883	-0.413378	0.206991	-0.145026	0.191586	-1.99708	0.0458166	0.403191	203.052	182.786	200.755	197.249	129.527	130.057	174.767	148.87
PEAK1	ENSG00000173517	79834	pseudopodium enriched atypical kinase 1 [Source:HGNC Symbol;Acc:HGNC:29431]	protein_coding	485.336	-0.276757	0.138612	-0.155522	0.137349	-1.99663	0.045865	0.403362	539.505	491.466	573.253	530.463	466.03	366.523	469.566	445.886
NANS	ENSG00000095380	54187	N-acetylneuraminate synthase [Source:HGNC Symbol;Acc:HGNC:19237]	protein_coding	849.032	-0.242693	0.121581	-0.149746	0.119475	-1.99613	0.0459197	0.403587	1002.28	957.511	771.687	946.473	798.527	798.074	753.802	763.91
RIMKLA	ENSG00000177181	284716	ribosomal modification protein rimK like family member A [Source:HGNC Symbol;Acc:HGNC:28725]	protein_coding	121.582	-1.03982	0.521135	-0.0486398	0.12565	-1.99529	0.0460111	0.404135	70.8322	244.522	154.337	184.262	144.216	67.9841	38.4103	68.0963
HSF1	ENSG00000185122	3297	heat shock transcription factor 1 [Source:HGNC Symbol;Acc:HGNC:5224]	protein_coding	642.673	0.295165	0.148067	0.157488	0.147621	1.99346	0.0462111	0.404866	509.992	560.464	581.376	650.598	650.305	756.693	799.894	632.064
PYGB	ENSG00000100994	5834	glycogen phosphorylase B [Source:HGNC Symbol;Acc:HGNC:9723]	protein_coding	675.249	-0.445832	0.223615	-0.134754	0.191242	-1.99374	0.0461802	0.404866	898.389	844.933	544.242	829.584	754.461	464.065	520.459	545.857
RWDD1	ENSG00000111832	51389	RWD domain containing 1 [Source:HGNC Symbol;Acc:HGNC:20993]	protein_coding	1792.14	0.291846	0.146372	0.15692	0.145776	1.99387	0.0461666	0.404866	1306.85	1741.92	1795.19	1597.07	2108.48	2190.27	1608.43	1988.92
SKA1	ENSG00000154839	220134	spindle and kinetochore associated complex subunit 1 [Source:HGNC Symbol;Acc:HGNC:28109]	protein_coding	347.186	0.332019	0.166536	0.158335	0.16661	1.99368	0.0461873	0.404866	277.426	294.153	323.76	327.126	404.605	452.242	337.05	361.128
HHEX	ENSG00000152804	3087	hematopoietically expressed homeobox [Source:HGNC Symbol;Acc:HGNC:4901]	protein_coding	113.158	0.789811	0.396461	0.0675051	0.137838	1.99215	0.0463541	0.405861	55.4852	130.735	68.4654	77.114	188.281	144.836	89.3039	151.043
FKBP7	ENSG00000079150	51661	FKBP prolyl isomerase 7 [Source:HGNC Symbol;Acc:HGNC:3723]	protein_coding	334.939	0.346646	0.174045	0.155874	0.172326	1.9917	0.0464039	0.406042	327.009	294.153	257.616	299.121	432.647	381.302	317.845	369.821
GPI	ENSG00000105220	2821	glucose-6-phosphate isomerase [Source:HGNC Symbol;Acc:HGNC:4458]	protein_coding	3059.46	-0.364245	0.182998	-0.154837	0.180206	-1.99043	0.0465431	0.406746	4410.49	2882.22	2824.49	3663.32	2968.44	2060.21	3117.95	2548.54
RPL26	ENSG00000161970	6154	ribosomal protein L26 [Source:HGNC Symbol;Acc:HGNC:10327]	protein_coding	8211.69	0.221469	0.111257	0.147091	0.109072	1.9906	0.046525	0.406746	6802.26	7223.09	8844.81	7451.65	8527.41	10008.4	7820.33	9015.52
EEF1D	ENSG00000104529	1936	eukaryotic translation elongation factor 1 delta [Source:HGNC Symbol;Acc:HGNC:3211]	protein_coding	4051.47	0.366286	0.184066	0.15552	0.181904	1.98997	0.0465937	0.406932	2613.71	3296.21	3690.17	4549.72	4533.44	5261.38	4951.08	3516.02
ELL2	ENSG00000118985	22936	elongation factor for RNA polymerase II 2 [Source:HGNC Symbol;Acc:HGNC:17064]	protein_coding	273.497	-0.444543	0.223444	-0.13398	0.189831	-1.9895	0.046646	0.407133	316.384	371.625	249.493	327.937	231.012	180.306	285.196	226.022
VBP1	ENSG00000155959	7411	VHL binding protein 1 [Source:HGNC Symbol;Acc:HGNC:12662]	protein_coding	1916.92	0.258847	0.130175	0.151977	0.128253	1.98846	0.0467612	0.407881	1958.51	1366.66	1943.72	1713.15	2101.81	2092.73	2024.22	2134.53
TXN2	ENSG00000100348	25828	thioredoxin 2 [Source:HGNC Symbol;Acc:HGNC:17772]	protein_coding	1618.23	0.282319	0.142044	0.154939	0.140672	1.98755	0.0468615	0.408499	1148.66	1470.77	1679.14	1543.9	1992.31	1616.84	1803.36	1690.82
GALNT6	ENSG00000139629	11226	polypeptide N-acetylgalactosaminyltransferase 6 [Source:HGNC Symbol;Acc:HGNC:4128]	protein_coding	167.044	-0.602571	0.303391	-0.0938829	0.160143	-1.98612	0.0470202	0.409602	141.664	228.786	229.765	209.425	134.868	85.7191	175.727	130.397
NDUFA6	ENSG00000184983	4700	NADH:ubiquinone oxidoreductase subunit A6 [Source:HGNC Symbol;Acc:HGNC:7690]	protein_coding	823.404	0.408886	0.205925	0.145227	0.191454	1.98561	0.0470766	0.409602	619.782	844.933	691.617	675.356	1239.19	842.412	692.345	981.601
NUDT17	ENSG00000186364	200035	nudix hydrolase 17 [Source:HGNC Symbol;Acc:HGNC:26618]	protein_coding	108.436	0.705751	0.355424	0.0771511	0.145375	1.98566	0.0470715	0.409602	95.6235	65.3673	96.3158	75.0847	184.275	76.8516	120.032	153.941
PWWP2A	ENSG00000170234	114825	PWWP domain containing 2A [Source:HGNC Symbol;Acc:HGNC:29406]	protein_coding	397.388	-0.610738	0.307671	-0.0906519	0.156781	-1.98503	0.0471406	0.409902	302.218	617.358	485.06	517.069	205.641	307.406	451.321	293.032
SOCS6	ENSG00000170677	9306	suppressor of cytokine signaling 6 [Source:HGNC Symbol;Acc:HGNC:16833]	protein_coding	134.284	-0.696549	0.351022	-0.0768609	0.144886	-1.98435	0.0472171	0.410309	114.512	192.471	184.509	168.839	116.174	141.88	59.5359	96.3491
GCDH	ENSG00000105607	2639	glutaryl-CoA dehydrogenase [Source:HGNC Symbol;Acc:HGNC:4189]	protein_coding	262.659	-0.402794	0.203052	-0.143267	0.187038	-1.9837	0.0472892	0.410422	227.844	352.257	309.835	303.586	212.317	254.201	217.018	224.211
NUDT1	ENSG00000106268	4521	nudix hydrolase 1 [Source:HGNC Symbol;Acc:HGNC:8048]	protein_coding	385.431	0.40464	0.203967	0.145029	0.18953	1.98385	0.0472729	0.410422	309.301	259.048	355.092	399.369	500.748	437.463	458.043	364.388
ESF1	ENSG00000089048	51575	ESF1 nucleolar pre-rRNA processing protein homolog [Source:HGNC Symbol;Acc:HGNC:15898]	protein_coding	1362.43	0.701037	0.353527	0.0779116	0.146235	1.98298	0.0473701	0.41061	1485.12	531.412	1252.11	886.405	1918.87	780.339	2144.25	1900.9
MAT2A	ENSG00000168906	4144	methionine adenosyltransferase 2A [Source:HGNC Symbol;Acc:HGNC:6904]	protein_coding	3171.04	-0.189941	0.0957827	-0.132802	0.0923145	-1.98304	0.0473624	0.41061	3136.69	3776.78	3213.23	3402.76	2992.47	2660.25	3207.26	2978.85
TSPAN17	ENSG00000048140	26262	tetraspanin 17 [Source:HGNC Symbol;Acc:HGNC:13594]	protein_coding	584.938	0.325525	0.164187	0.156441	0.162885	1.98265	0.0474066	0.410669	515.895	528.991	527.996	508.952	536.802	585.255	809.497	666.112
SLC26A2	ENSG00000155850	1836	solute carrier family 26 member 2 [Source:HGNC Symbol;Acc:HGNC:10994]	protein_coding	519.797	0.354154	0.178796	0.154515	0.17601	1.98078	0.0476161	0.412227	553.672	420.046	407.311	442.797	654.311	614.813	466.685	598.741
MRPS23	ENSG00000181610	51649	mitochondrial ribosomal protein S23 [Source:HGNC Symbol;Acc:HGNC:14509]	protein_coding	1025.55	0.450532	0.227722	0.133264	0.19176	1.97844	0.0478796	0.414249	764.988	727.514	1156.95	823.09	1404.77	771.472	1322.27	1233.34
ATG7	ENSG00000197548	10533	autophagy related 7 [Source:HGNC Symbol;Acc:HGNC:16935]	protein_coding	261.006	-0.688658	0.348277	-0.0782327	0.146132	-1.97733	0.0480045	0.415071	303.398	185.207	458.37	343.766	285.76	130.057	192.051	189.438
FH	ENSG00000091483	2271	fumarate hydratase [Source:HGNC Symbol;Acc:HGNC:3700]	protein_coding	1053.9	0.319011	0.161398	0.156313	0.160138	1.97655	0.0480928	0.415576	835.82	831.618	1158.11	929.832	1376.72	996.115	1119.66	1183.35
RPL23A	ENSG00000198242	6147	ribosomal protein L23a [Source:HGNC Symbol;Acc:HGNC:10317]	protein_coding	23997.6	0.373107	0.188792	0.149378	0.181094	1.97628	0.0481228	0.415576	15371.8	17138.3	24335.4	26793.5	31005	28710	27960.8	20666.1
INTS4	ENSG00000149262	92105	integrator complex subunit 4 [Source:HGNC Symbol;Acc:HGNC:25048]	protein_coding	436.026	-0.66	0.334109	-0.0817272	0.148961	-1.9754	0.0482223	0.416156	497.006	243.312	822.746	571.455	315.138	378.346	347.613	312.591
POLR2A	ENSG00000181222	5430	RNA polymerase II subunit A [Source:HGNC Symbol;Acc:HGNC:9187]	protein_coding	2912.64	-0.172511	0.0873404	-0.125709	0.0838347	-1.97516	0.0482499	0.416156	3216.96	3272	2674.79	3180.75	2789.5	2722.32	2754.98	2689.8
TXNDC11	ENSG00000153066	51061	thioredoxin domain containing 11 [Source:HGNC Symbol;Acc:HGNC:28030]	protein_coding	399.002	-0.271443	0.137473	-0.152584	0.135267	-1.97452	0.048323	0.416268	458.048	422.467	451.408	420.474	389.916	319.23	347.613	382.861
WBP2	ENSG00000132471	23558	WW domain binding protein 2 [Source:HGNC Symbol;Acc:HGNC:12738]	protein_coding	895.229	-0.522384	0.264552	-0.101747	0.163341	-1.97459	0.0483141	0.416268	1416.64	1019.25	620.831	1159.14	693.036	981.336	598.24	673.357
ARMCX4	ENSG00000196440	100131755	armadillo repeat containing X-linked 4 [Source:HGNC Symbol;Acc:HGNC:28615]	protein_coding	4.72065	3.50918	1.7779	0.0118427	0.113195	1.97377	0.0484074	0.416471	0	0	0	2.43518	12.018	14.7792	6.7218	1.81107
[truncated: 18,355 more rows]
