# Supplementary material for: Mutation at the Site of Hydroxylation in the Ribosomal Protein uL15 (RPL27a) Causes Specific Changes in the Repertoire of mRNAs Translated in Mammalian Cells
Source: Int J Mol Sci. 2023 Mar 24;24(7):6173. doi: 10.3390/ijms24076173 (PMC10094517; doi:10.3390/ijms24076173)
Supplement: Supplementary file 1 [file ijms-24-06173-s001.zip › Table S3.xlsx]

## Sheet: Лист1
hgnc_symbol	ensembl	entrez	description	gene_biotype	baseMean	log2FoldChange	lfcSE	LFC_Shrunken	lfcSE_Shrunken	stat	pvalue	padj	L15.R2	L15.R3	L15.R4	L15m.R1	L15m.R2	L15m.R3	L15m.R4
RACK1	ENSG00000204628	10399	receptor for activated C kinase 1 [Source:HGNC Symbol;Acc:HGNC:4399]	protein_coding	43068.4	0.743459	0.102179	0.714124	0.104596	7.27602	3.43816e-13	4.58032e-09	31515.4	27493.1	34790.5	54452.9	52522.5	49698.1	51006.4
RPL10	ENSG00000147403	6134	ribosomal protein L10 [Source:HGNC Symbol;Acc:HGNC:10298]	protein_coding	32690.3	0.825739	0.120186	0.791597	0.123537	6.87052	6.39662e-12	4.26079e-08	23640.8	19387.3	25434.1	41935.7	44248.3	34514.5	39671.5
RPS9	ENSG00000170889	6203	ribosomal protein S9 [Source:HGNC Symbol;Acc:HGNC:10442]	protein_coding	12256.1	0.704043	0.11596	0.672999	0.119543	6.07142	1.26782e-09	5.62998e-06	9417.74	7794.5	9959.63	15881.4	15192.2	13122.6	14424.3
PRADC1	ENSG00000135617	84279	protease associated domain containing 1 [Source:HGNC Symbol;Acc:HGNC:16047]	protein_coding	265.923	1.73524	0.294241	1.62903	0.307932	5.89735	3.69386e-09	8.83744e-06	139.977	64.0086	146.333	414.33	337.655	357.093	402.063
RPS29	ENSG00000213741	6235	ribosomal protein S29 [Source:HGNC Symbol;Acc:HGNC:10419]	protein_coding	4919.22	0.990839	0.167661	0.933636	0.173941	5.90977	3.42589e-09	8.83744e-06	3414.08	2577.8	3499.43	7522.14	6806.23	4394.28	6220.6
RPL18A	ENSG00000105640	6142	ribosomal protein L18a [Source:HGNC Symbol;Acc:HGNC:10311]	protein_coding	12868.5	0.705156	0.119822	0.665628	0.123805	5.88501	3.98023e-09	8.83744e-06	10349.8	7766.86	10395.9	16036.5	14294.4	15999.8	15236.1
VPS28	ENSG00000160948	51160	VPS28 subunit of ESCRT-I [Source:HGNC Symbol;Acc:HGNC:18178]	protein_coding	770.202	0.876232	0.16098	0.815197	0.168066	5.44311	5.23575e-08	9.96439e-05	503.577	474.245	594.759	969.192	923.292	982.515	943.838
KIAA1671	ENSG00000197077	85379	KIAA1671 [Source:HGNC Symbol;Acc:HGNC:29345]	protein_coding	498.474	-1.01109	0.18692	-0.939343	0.193061	-5.40925	6.32893e-08	0.000105392	776.703	658.997	663.437	316.199	357.582	369.336	347.064
RPL30	ENSG00000156482	6156	ribosomal protein L30 [Source:HGNC Symbol;Acc:HGNC:10333]	protein_coding	8988.43	0.835023	0.158832	0.768319	0.166105	5.25728	1.46203e-07	0.000216412	6838.4	5103.23	6768.13	13361.5	11767	8010.1	11070.7
RPS5	ENSG00000083845	6193	ribosomal protein S5 [Source:HGNC Symbol;Acc:HGNC:10426]	protein_coding	14270.6	0.72264	0.141033	0.664576	0.147407	5.12392	2.99254e-07	0.000398667	11910	8166.91	11257.3	18929.5	18310.8	14255.1	17064.3
RPS14	ENSG00000164587	6208	ribosomal protein S14 [Source:HGNC Symbol;Acc:HGNC:10387]	protein_coding	21459.1	0.685606	0.134292	0.640197	0.140036	5.10533	3.30216e-07	0.000399922	17408.4	13338.5	17198.2	28138.1	28136	20565.5	25429.2
RPS11	ENSG00000142534	6205	ribosomal protein S11 [Source:HGNC Symbol;Acc:HGNC:10384]	protein_coding	22528.3	0.666341	0.131354	0.618351	0.136978	5.07287	3.91861e-07	0.000401567	19130.8	13369.1	18304.7	30003.8	26326	24031.3	26532.4
RPS3	ENSG00000149273	6188	ribosomal protein S3 [Source:HGNC Symbol;Acc:HGNC:10420]	protein_coding	33429.9	0.625138	0.123149	0.57725	0.128295	5.07626	3.84928e-07	0.000401567	28435.9	20760.6	27649.8	42490.6	40359.1	35338.9	38974.2
ECI2	ENSG00000198721	10455	enoyl-CoA delta isomerase 2 [Source:HGNC Symbol;Acc:HGNC:14601]	protein_coding	1455.12	0.773307	0.153246	0.710512	0.160658	5.04617	4.50743e-07	0.000428914	1075.44	896.12	1150.02	2011.07	1496.75	1802.81	1753.65
RPL13A	ENSG00000142541	23521	ribosomal protein L13a [Source:HGNC Symbol;Acc:HGNC:10304]	protein_coding	32242.5	0.615987	0.12369	0.566959	0.129028	4.98008	6.35592e-07	0.00052921	27304.1	20386.7	26728.2	41973.3	38397.4	33446.3	37461.4
KMT2D	ENSG00000167548	8085	lysine methyltransferase 2D [Source:HGNC Symbol;Acc:HGNC:7133]	protein_coding	759.291	-0.875261	0.175526	-0.802967	0.182527	-4.9865	6.14828e-07	0.00052921	850.106	1224.89	999.195	550.017	566.817	573.389	550.625
COL5A1	ENSG00000130635	1289	collagen type V alpha 1 chain [Source:HGNC Symbol;Acc:HGNC:2209]	protein_coding	167.45	-1.70766	0.34817	-1.55615	0.364028	-4.90469	9.35762e-07	0.000733307	305.56	257.489	268.876	49.6711	125.098	82.6414	82.815
NTHL1	ENSG00000065057	4913	nth like DNA glycosylase 1 [Source:HGNC Symbol;Acc:HGNC:8028]	protein_coding	713.541	0.819665	0.168366	0.747616	0.177559	4.86835	1.12536e-06	0.000832893	503.577	432.058	561.093	925.579	877.902	833.556	861.023
FAM228B	ENSG00000219626	375190	family with sequence similarity 228 member B [Source:HGNC Symbol;Acc:HGNC:24736]	protein_coding	57.2631	3.12122	0.645148	2.83283	0.68076	4.838	1.31155e-06	0.000919606	1.70704	18.9116	11.2219	127.206	74.1733	55.0943	112.527
TRAF3IP2	ENSG00000056972	10758	TRAF3 interacting protein 2 [Source:HGNC Symbol;Acc:HGNC:1343]	protein_coding	136.7	2.21634	0.460794	2.0051	0.492803	4.80982	1.51069e-06	0.000925004	52.9182	27.6401	56.1093	128.418	104.064	346.89	240.859
KLRG2	ENSG00000188883	346689	killer cell lectin like receptor G2 [Source:HGNC Symbol;Acc:HGNC:24778]	protein_coding	323.4	1.1019	0.229487	0.998468	0.244015	4.8016	1.57405e-06	0.000925004	187.774	173.114	229.824	454.309	367.545	434.633	416.603
TK1	ENSG00000167900	7083	thymidine kinase 1 [Source:HGNC Symbol;Acc:HGNC:11830]	protein_coding	2188.58	0.703552	0.146874	0.641347	0.154329	4.79017	1.66642e-06	0.000925004	1829.95	1268.53	1753.3	2404.81	2804.19	2641.46	2617.84
RPS16	ENSG00000105193	6217	ribosomal protein S16 [Source:HGNC Symbol;Acc:HGNC:10396]	protein_coding	18492.9	0.627434	0.130038	0.57933	0.135742	4.82499	1.40007e-06	0.000925004	15776.5	11533.2	15122.6	24808.9	21680.8	19013.6	21514.8
RPL7A	ENSG00000148303	6130	ribosomal protein L7a [Source:HGNC Symbol;Acc:HGNC:10364]	protein_coding	33811.5	0.495731	0.103481	0.455729	0.10755	4.79055	1.66329e-06	0.000925004	27626.7	25238.3	29553	41761.3	39760.2	34879.8	37861
RPS28	ENSG00000233927	6234	ribosomal protein S28 [Source:HGNC Symbol;Acc:HGNC:10418]	protein_coding	7386.83	0.672719	0.141546	0.61261	0.148634	4.75265	2.00765e-06	0.00106983	6534.55	4137.28	5933.67	9229.13	8237.67	8850.79	8784.71
RPL27	ENSG00000131469	6155	ribosomal protein L27 [Source:HGNC Symbol;Acc:HGNC:10328]	protein_coding	16846.3	0.64235	0.135467	0.584449	0.14211	4.74175	2.11877e-06	0.00108562	14684	10039.2	13670.5	22470.7	19642.6	17639.4	19777.6
RPL37	ENSG00000145592	6167	ribosomal protein L37 [Source:HGNC Symbol;Acc:HGNC:10347]	protein_coding	10055.4	0.708455	0.150022	0.643582	0.15786	4.72233	2.33164e-06	0.00115045	8026.5	6288.84	7900.19	14702.6	12370.3	9069.13	12030.3
RPS21	ENSG00000171858	6227	ribosomal protein S21 [Source:HGNC Symbol;Acc:HGNC:10409]	protein_coding	5255.24	0.766224	0.163578	0.691649	0.172616	4.68416	2.8111e-06	0.00133748	4477.57	2785.83	4039.42	7638.45	6236.09	5192.13	6417.21
ESD	ENSG00000139684	2098	esterase D [Source:HGNC Symbol;Acc:HGNC:3465]	protein_coding	1729.47	0.642597	0.137677	0.582026	0.14488	4.66744	3.04978e-06	0.00140101	1340.03	1160.88	1442.68	2252.16	2062.46	1836.48	2011.58
RPL29	ENSG00000162244	6159	ribosomal protein L29 [Source:HGNC Symbol;Acc:HGNC:10331]	protein_coding	25598	0.55187	0.119306	0.501501	0.124827	4.62568	3.73379e-06	0.00163724	20989.8	18213.4	21620	30787.6	33421.2	24746.5	29407.5
RPS19	ENSG00000105372	6223	ribosomal protein S19 [Source:HGNC Symbol;Acc:HGNC:10402]	protein_coding	14808.1	0.517625	0.112004	0.471475	0.117015	4.6215	3.80982e-06	0.00163724	12657.7	10271.9	12807.7	18406.2	17114.1	15731.5	16667.9
PSMA6	ENSG00000100902	5687	proteasome 20S subunit alpha 6 [Source:HGNC Symbol;Acc:HGNC:9535]	protein_coding	389.021	1.08703	0.237995	0.973199	0.254399	4.56744	4.93727e-06	0.00205545	175.825	266.218	273.365	569.401	526.963	399.944	511.43
TBRG4	ENSG00000136270	9238	transforming growth factor beta regulator 4 [Source:HGNC Symbol;Acc:HGNC:17443]	protein_coding	1315.32	0.724821	0.158983	0.653026	0.168001	4.55911	5.13702e-06	0.0020738	868.883	977.586	1040.04	1315.68	1508.93	1888.51	1607.62
SLC25A3	ENSG00000075415	5250	solute carrier family 25 member 3 [Source:HGNC Symbol;Acc:HGNC:10989]	protein_coding	7423.16	0.494315	0.108839	0.447115	0.1137	4.5417	5.58025e-06	0.002124	6389.45	5238.52	6476.36	8565.24	8681.6	8271.28	8339.66
DYNC1H1	ENSG00000197102	1778	dynein cytoplasmic 1 heavy chain 1 [Source:HGNC Symbol;Acc:HGNC:2961]	protein_coding	4049.05	-0.699562	0.154007	-0.62893	0.161395	-4.54242	5.56122e-06	0.002124	4195.9	6159.37	5186.75	2708.89	3874.73	3161.8	3055.94
SLC10A4	ENSG00000145248	201780	solute carrier family 10 member 4 [Source:HGNC Symbol;Acc:HGNC:22980]	protein_coding	33.3255	6.12845	1.35473	5.30386	1.5373	4.52375	6.07524e-06	0.00223157	1.70704	1.45474	0	42.4022	65.3168	1.02026	121.378
ATP6V0B	ENSG00000117410	533	ATPase H+ transporting V0 subunit b [Source:HGNC Symbol;Acc:HGNC:861]	protein_coding	1612.14	1.01803	0.225534	0.908831	0.240615	4.51387	6.36539e-06	0.00223157	1399.77	587.715	1079.54	1905.67	1673.88	2464.96	2173.42
RPL41	ENSG00000229117	6171	ribosomal protein L41 [Source:HGNC Symbol;Acc:HGNC:10354]	protein_coding	26308.8	0.744192	0.164761	0.670078	0.174448	4.5168	6.27811e-06	0.00223157	22128.4	14893.6	20115.4	39764.8	32179	22991.7	32088.6
ACER2	ENSG00000177076	340485	alkaline ceramidase 2 [Source:HGNC Symbol;Acc:HGNC:23675]	protein_coding	48.8333	2.89631	0.64801	2.56428	0.705035	4.46955	7.83843e-06	0.00248628	13.6563	4.36422	14.364	104.188	81.9228	36.7295	86.608
CYB561D2	ENSG00000114395	11068	cytochrome b561 family member D2 [Source:HGNC Symbol;Acc:HGNC:30253]	protein_coding	256.694	1.27827	0.285315	1.13746	0.307361	4.4802	7.45721e-06	0.00248628	131.442	129.472	167.879	454.309	243.554	319.343	350.857
TMEM219	ENSG00000149932	124446	transmembrane protein 219 [Source:HGNC Symbol;Acc:HGNC:25201]	protein_coding	566.438	0.832968	0.186102	0.743678	0.198515	4.47587	7.61018e-06	0.00248628	414.811	324.407	442.59	649.359	722.913	716.226	694.761
NOB1	ENSG00000141101	28987	NIN1 (RPN12) binding protein 1 homolog [Source:HGNC Symbol;Acc:HGNC:29540]	protein_coding	1912.08	0.597871	0.133711	0.537837	0.140974	4.47136	7.77234e-06	0.00248628	1577.31	1261.26	1612.36	2202.49	2381.3	2138.47	2211.35
BPHL	ENSG00000137274	670	biphenyl hydrolase like [Source:HGNC Symbol;Acc:HGNC:1094]	protein_coding	528.717	0.962663	0.215745	0.858935	0.23055	4.46204	8.11844e-06	0.00251521	274.833	375.323	384.685	655.416	522.534	802.948	685.278
UGT3A2	ENSG00000168671	167127	UDP glycosyltransferase family 3 member A2 [Source:HGNC Symbol;Acc:HGNC:27266]	protein_coding	66.4846	2.1757	0.488226	1.92361	0.533005	4.45634	8.33697e-06	0.00252421	22.1915	14.5474	31.8701	102.977	86.351	99.9859	107.47
NOSIP	ENSG00000142546	51070	nitric oxide synthase interacting protein [Source:HGNC Symbol;Acc:HGNC:17946]	protein_coding	1061.16	0.874999	0.19676	0.781166	0.209803	4.44704	8.70624e-06	0.00257743	862.055	529.526	776.553	1035.82	1295.27	1572.23	1356.65
MRPL44	ENSG00000135900	65080	mitochondrial ribosomal protein L44 [Source:HGNC Symbol;Acc:HGNC:16650]	protein_coding	507.892	0.86511	0.195239	0.771046	0.208542	4.43102	9.37864e-06	0.00265834	302.146	349.138	391.867	536.69	687.487	651.949	635.968
SOCS3	ENSG00000184557	9021	suppressor of cytokine signaling 3 [Source:HGNC Symbol;Acc:HGNC:19391]	protein_coding	22.2791	-5.5199	1.24516	-0.047188	0.142186	-4.4331	9.28866e-06	0.00265834	1.70704	87.2844	61.4958	1.21149	2.21413	2.04053	0
ZMAT5	ENSG00000100319	55954	zinc finger matrin-type 5 [Source:HGNC Symbol;Acc:HGNC:28046]	protein_coding	564.871	0.889776	0.203203	0.789843	0.21794	4.37876	1.19359e-05	0.0030504	437.002	277.855	433.613	722.048	655.382	718.266	709.933
FDFT1	ENSG00000079459	2222	farnesyl-diphosphate farnesyltransferase 1 [Source:HGNC Symbol;Acc:HGNC:3629]	protein_coding	1712.86	0.643198	0.146469	0.575346	0.155042	4.39136	1.12646e-05	0.0030504	1411.72	1093.96	1398.69	1790.58	2000.47	2269.07	2025.49
RPLP2	ENSG00000177600	6181	ribosomal protein lateral stalk subunit P2 [Source:HGNC Symbol;Acc:HGNC:10377]	protein_coding	10126.2	0.414882	0.0945905	0.376732	0.0982395	4.38609	1.15407e-05	0.0030504	8280.85	8191.64	9107.22	11478.9	11077.3	11604.5	11143.4
SNRNP200	ENSG00000144028	23020	small nuclear ribonucleoprotein U5 subunit 200 [Source:HGNC Symbol;Acc:HGNC:30859]	protein_coding	3003.72	-0.60535	0.138164	-0.546029	0.144744	-4.38138	1.17929e-05	0.0030504	3096.57	4393.32	3700.52	2453.27	2693.49	2306.82	2382.04
MYH10	ENSG00000133026	4628	myosin heavy chain 10 [Source:HGNC Symbol;Acc:HGNC:7568]	protein_coding	2052.15	-0.650038	0.148361	-0.580687	0.155837	-4.38148	1.17878e-05	0.0030504	2109.9	3073.87	2572.05	1549.5	1814.48	1647.73	1597.51
FLNB	ENSG00000136068	2317	filamin B [Source:HGNC Symbol;Acc:HGNC:3755]	protein_coding	1557.07	-0.793941	0.181467	-0.705984	0.191687	-4.37514	1.21357e-05	0.0030504	1601.2	2502.15	2046.87	986.153	1481.25	1155.96	1125.9
TMEM141	ENSG00000244187	85014	transmembrane protein 141 [Source:HGNC Symbol;Acc:HGNC:28211]	protein_coding	457.018	1.13062	0.259264	0.999506	0.279652	4.3609	1.29529e-05	0.0031763	288.49	226.94	307.03	789.892	607.778	368.315	610.681
RPL32	ENSG00000144713	6161	ribosomal protein L32 [Source:HGNC Symbol;Acc:HGNC:10336]	protein_coding	16956.7	0.606156	0.139084	0.540892	0.147086	4.3582	1.31134e-05	0.0031763	14390.3	11024	13874.3	23335.7	20518.3	15721.3	19833.2
TIMM23B	ENSG00000204152	100652748	translocase of inner mitochondrial membrane 23 homolog B [Source:HGNC Symbol;Acc:HGNC:23581]	protein_coding	64.7857	2.624	0.603861	2.30663	0.660888	4.34538	1.39036e-05	0.00330757	17.0704	11.6379	21.9949	130.841	127.312	29.5877	115.056
NUBP1	ENSG00000103274	4682	nucleotide binding protein 1 [Source:HGNC Symbol;Acc:HGNC:8041]	protein_coding	376.856	0.911779	0.210664	0.809209	0.226334	4.32813	1.50382e-05	0.00351472	237.279	231.304	287.729	439.771	509.25	464.22	468.442
RPL37A	ENSG00000197756	6168	ribosomal protein L37a [Source:HGNC Symbol;Acc:HGNC:10348]	protein_coding	16663	0.565668	0.131047	0.502814	0.138347	4.31654	1.58495e-05	0.00364046	14267.4	11125.9	13942.9	22721.5	19145.6	16229.3	19208
SLC25A5	ENSG00000005022	292	solute carrier family 25 member 5 [Source:HGNC Symbol;Acc:HGNC:10991]	protein_coding	15343.3	0.411103	0.0954893	0.371387	0.0992946	4.30523	1.66812e-05	0.00376655	12946.2	12039.4	13835.2	17554.5	17643.3	16595.6	16788.7
FRG1	ENSG00000109536	2483	FSHD region gene 1 [Source:HGNC Symbol;Acc:HGNC:3954]	protein_coding	379.077	1.04172	0.243223	0.916206	0.263009	4.28299	1.84397e-05	0.00409423	274.833	170.205	269.325	569.401	401.864	475.443	492.464
RPS15	ENSG00000115268	6209	ribosomal protein S15 [Source:HGNC Symbol;Acc:HGNC:10388]	protein_coding	20862	0.629411	0.147164	0.562918	0.156037	4.27692	1.89496e-05	0.00409577	18774	12227.1	16799.6	29284.1	23175.3	21291.9	24481.6
RPS20	ENSG00000008988	6224	ribosomal protein S20 [Source:HGNC Symbol;Acc:HGNC:10405]	protein_coding	10133.6	0.527883	0.123464	0.470468	0.130075	4.27561	1.90615e-05	0.00409577	8291.09	7378.44	8666.42	13536	11771.4	9806.78	11485.4
PSMD4	ENSG00000159352	5710	proteasome 26S subunit, non-ATPase 4 [Source:HGNC Symbol;Acc:HGNC:9561]	protein_coding	3014.96	0.467099	0.11008	0.422113	0.11527	4.24327	2.20289e-05	0.00465823	2376.2	2406.14	2657.79	3287.99	3544.82	3464.82	3366.97
RPS23	ENSG00000186468	6228	ribosomal protein S23 [Source:HGNC Symbol;Acc:HGNC:10410]	protein_coding	15946.4	0.744708	0.175664	0.655502	0.18787	4.23938	2.24137e-05	0.00466554	12819.9	9752.58	12036.1	25563.7	19143.4	12708.4	19600.6
RPL18	ENSG00000063177	6141	ribosomal protein L18 [Source:HGNC Symbol;Acc:HGNC:10310]	protein_coding	21653.1	0.576892	0.136319	0.511211	0.14452	4.23194	2.31683e-05	0.00466715	19740.2	13207.6	17898.4	28459.1	24524.8	22570.3	25171.3
PHB	ENSG00000167085	5245	prohibitin [Source:HGNC Symbol;Acc:HGNC:8912]	protein_coding	6150.38	0.515493	0.121973	0.464002	0.128354	4.2263	2.37561e-05	0.00466715	5522.27	4070.36	5262.16	6781.92	7212.53	7202.05	7001.34
RUNX1T1	ENSG00000079102	862	RUNX1 partner transcriptional co-repressor 1 [Source:HGNC Symbol;Acc:HGNC:1535]	protein_coding	16.9314	-5.82649	1.37883	-0.0440831	0.140455	-4.22567	2.38227e-05	0.00466715	68.2816	2.90948	43.9897	1.21149	1.10706	1.02026	0
HOXD10	ENSG00000128710	3236	homeobox D10 [Source:HGNC Symbol;Acc:HGNC:5133]	protein_coding	403.679	-1.00511	0.237686	-0.882105	0.253198	-4.22872	2.3502e-05	0.00466715	508.698	634.267	552.116	379.197	221.413	255.066	274.996
RPL9	ENSG00000163682	6133	ribosomal protein L9 [Source:HGNC Symbol;Acc:HGNC:10369]	protein_coding	14770.3	0.59891	0.141964	0.535161	0.150086	4.21873	2.45679e-05	0.00474338	11367.2	10936.7	12024	19946	19179.9	12594.1	17344.4
PSMB2	ENSG00000126067	5690	proteasome 20S subunit beta 2 [Source:HGNC Symbol;Acc:HGNC:9539]	protein_coding	2740.79	0.570441	0.135418	0.506205	0.14351	4.21245	2.52612e-05	0.0047963	2384.74	1761.69	2310.81	3464.86	3099.78	3017.94	3145.7
COL3A1	ENSG00000168542	1281	collagen type III alpha 1 chain [Source:HGNC Symbol;Acc:HGNC:2201]	protein_coding	152.69	-1.40489	0.333721	-1.22894	0.356655	-4.20978	2.5562e-05	0.0047963	225.329	256.034	229.375	64.209	81.9228	123.452	88.5045
MACROD1	ENSG00000133315	28992	mono-ADP ribosylhydrolase 1 [Source:HGNC Symbol;Acc:HGNC:29598]	protein_coding	546.924	0.78368	0.187472	0.688049	0.201821	4.18025	2.91183e-05	0.00538282	394.326	338.955	433.613	722.048	593.387	688.679	657.462
ATP6V1F	ENSG00000128524	9296	ATPase H+ transporting V1 subunit F [Source:HGNC Symbol;Acc:HGNC:16832]	protein_coding	2828.97	0.69079	0.165367	0.608033	0.176858	4.17732	2.9496e-05	0.00538282	2511.06	1556.57	2236.29	3947.04	3281.34	2875.11	3395.41
GALK1	ENSG00000108479	2584	galactokinase 1 [Source:HGNC Symbol;Acc:HGNC:4118]	protein_coding	1427.85	0.620913	0.148844	0.547702	0.158623	4.17157	3.02512e-05	0.00544603	1220.53	883.027	1184.13	1726.37	1660.6	1658.95	1661.36
RPL24	ENSG00000114391	6152	ribosomal protein L24 [Source:HGNC Symbol;Acc:HGNC:10325]	protein_coding	22408.7	0.61507	0.1476	0.538607	0.157265	4.16714	3.08449e-05	0.00547887	19352.7	14192.4	18155.2	32650.9	25248.8	20866.5	26394.6
GPLD1	ENSG00000112293	2822	glycosylphosphatidylinositol specific phospholipase D1 [Source:HGNC Symbol;Acc:HGNC:4459]	protein_coding	52.2316	3.06107	0.738636	2.6433	0.823769	4.14422	3.40971e-05	0.00560921	23.8986	1.45474	6.28424	78.7469	111.814	34.689	108.734
RTN4IP1	ENSG00000130347	84816	reticulon 4 interacting protein 1 [Source:HGNC Symbol;Acc:HGNC:18647]	protein_coding	96.3937	1.86638	0.450421	1.61468	0.497251	4.14365	3.41827e-05	0.00560921	37.5549	30.5496	49.8251	84.8043	209.235	109.168	153.619
RPL31	ENSG00000071082	6160	ribosomal protein L31 [Source:HGNC Symbol;Acc:HGNC:10334]	protein_coding	14430.5	0.673373	0.162307	0.592049	0.173421	4.14876	3.3428e-05	0.00560921	11763.2	9365.62	11258.2	22040.6	17243.6	12004.4	17338
UBA52	ENSG00000221983	7311	ubiquitin A-52 residue ribosomal protein fusion product 1 [Source:HGNC Symbol;Acc:HGNC:12458]	protein_coding	8459.86	0.517699	0.124754	0.455611	0.131859	4.14977	3.32814e-05	0.00560921	7657.78	5529.47	7220.6	10371.6	9734.42	9101.78	9603.37
RPL8	ENSG00000161016	6132	ribosomal protein L8 [Source:HGNC Symbol;Acc:HGNC:10368]	protein_coding	41186.2	0.475299	0.114769	0.422621	0.120673	4.14136	3.4526e-05	0.00560921	37602.7	27851	35822	49205.9	45648.7	45923.1	46249.9
SPEN	ENSG00000065526	23013	spen family transcriptional repressor [Source:HGNC Symbol;Acc:HGNC:17575]	protein_coding	2621.58	-0.535592	0.128951	-0.473656	0.135218	-4.15346	3.27482e-05	0.00560921	2956.59	3431.73	3160.08	1912.94	2441.08	2306.82	2141.81
NPIPB13	ENSG00000198064	613037	nuclear pore complex interacting protein family, member B13 [Source:HGNC Symbol;Acc:HGNC:41989]	protein_coding	532.759	-0.989759	0.238377	-0.861771	0.255041	-4.15207	3.29484e-05	0.00560921	537.718	949.946	739.296	284.7	440.612	422.39	354.65
LY6E	ENSG00000160932	4061	lymphocyte antigen 6 family member E [Source:HGNC Symbol;Acc:HGNC:6727]	protein_coding	1641.12	0.643787	0.155777	0.565924	0.166413	4.13275	3.58447e-05	0.00575329	1440.74	963.038	1335.85	1922.64	1816.69	2068.08	1940.78
RPS13	ENSG00000110700	6207	ribosomal protein S13 [Source:HGNC Symbol;Acc:HGNC:10386]	protein_coding	8625.8	0.553047	0.133991	0.490442	0.142158	4.1275	3.66724e-05	0.00576956	7669.73	5574.57	7235.41	11287.5	10096.4	8572.26	9944.75
RPS2	ENSG00000140988	6187	ribosomal protein S2 [Source:HGNC Symbol;Acc:HGNC:10404]	protein_coding	73012.2	0.39842	0.0965486	0.356894	0.100516	4.12663	3.68122e-05	0.00576956	64806.1	55168.1	65797.4	81058.4	82225	81914	80116.2
IDUA	ENSG00000127415	3425	alpha-L-iduronidase [Source:HGNC Symbol;Acc:HGNC:5391]	protein_coding	16.5277	5.85843	1.42073	5.11409	1.64394	4.12353	3.73108e-05	0.0057797	0	0	0.897749	8.48043	47.6038	34.689	24.0227
RPL27A	ENSG00000166441	6157	ribosomal protein L27a [Source:HGNC Symbol;Acc:HGNC:10329]	protein_coding	176773	0.572397	0.139675	0.50391	0.148452	4.09806	4.16626e-05	0.00630715	165368	105040	145376	232338	195428	188760	205099
UBP1	ENSG00000153560	7342	upstream binding protein 1 [Source:HGNC Symbol;Acc:HGNC:12507]	protein_coding	1282.87	-0.6238	0.152213	-0.547461	0.160974	-4.09819	4.16388e-05	0.00630715	1444.16	1776.24	1588.57	964.346	970.896	1221.26	1014.64
RPS3A	ENSG00000145425	6189	ribosomal protein S3A [Source:HGNC Symbol;Acc:HGNC:10421]	protein_coding	22385.5	0.686002	0.167665	0.597655	0.17987	4.0915	4.2859e-05	0.00641536	16532.7	16108.3	17305	36405.3	24952.1	18238.2	27157
EDF1	ENSG00000107223	8721	endothelial differentiation related factor 1 [Source:HGNC Symbol;Acc:HGNC:3164]	protein_coding	3249.11	0.690415	0.16888	0.601474	0.181336	4.08821	4.34722e-05	0.00643485	2939.52	1750.05	2550.51	4481.3	3896.87	3206.69	3918.85
CHD8	ENSG00000100888	57680	chromodomain helicase DNA binding protein 8 [Source:HGNC Symbol;Acc:HGNC:20153]	protein_coding	1556.8	-0.572108	0.140197	-0.502948	0.147806	-4.08074	4.48927e-05	0.00657209	1749.72	2091.92	1897.84	1223.61	1203.38	1471.22	1259.93
ILVBL	ENSG00000105135	10994	ilvB acetolactate synthase like [Source:HGNC Symbol;Acc:HGNC:6041]	protein_coding	883.35	0.617843	0.152171	0.53847	0.16302	4.06018	4.90351e-05	0.0071005	682.816	609.536	743.785	1062.48	1050.6	1015.16	1019.07
PRMT1	ENSG00000126457	3276	protein arginine methyltransferase 1 [Source:HGNC Symbol;Acc:HGNC:5187]	protein_coding	3391.27	0.46839	0.115627	0.411305	0.121737	4.05088	5.1025e-05	0.00730919	2601.53	2820.74	2941.92	3439.42	4020.86	4060.65	3853.74
ATP6V0E1	ENSG00000113732	8992	ATPase H+ transporting V0 subunit e1 [Source:HGNC Symbol;Acc:HGNC:863]	protein_coding	1004.89	0.680344	0.168703	0.59065	0.1816	4.03279	5.51185e-05	0.00781158	827.914	610.991	812.463	1263.58	1027.36	1297.78	1194.18
ECH1	ENSG00000104823	1891	enoyl-CoA hydratase 1 [Source:HGNC Symbol;Acc:HGNC:3149]	protein_coding	1073.26	0.690117	0.171573	0.599692	0.184874	4.02229	5.76343e-05	0.00808215	921.802	609.536	862.288	1312.04	1367.22	1161.06	1278.89
H2BC17	ENSG00000274641	8348	H2B clustered histone 17 [Source:HGNC Symbol;Acc:HGNC:4758]	protein_coding	25.9675	5.77066	1.43696	4.81371	1.65123	4.01589	5.9223e-05	0.00813371	1.70704	1.45474	0	76.3239	1.10706	18.3648	82.815
VIPAS39	ENSG00000151445	63894	VPS33B interacting protein, apical-basolateral polarity regulator, spe-39 homolog [Source:HGNC Symbol;Acc:HGNC:20347]	protein_coding	417.801	0.845561	0.210508	0.730903	0.228843	4.01677	5.90019e-05	0.00813371	228.743	312.769	324.087	487.019	497.072	554.004	520.912
H2BS1	ENSG00000234289	54145	H2B.S histone 1 [Source:HGNC Symbol;Acc:HGNC:4762]	protein_coding	55.0097	2.74354	0.684562	2.34004	0.765683	4.00773	6.1306e-05	0.00816719	20.4845	4.36422	14.8129	149.013	28.7837	68.3577	99.2515
SLC35B1	ENSG00000121073	10237	solute carrier family 35 member B1 [Source:HGNC Symbol;Acc:HGNC:20798]	protein_coding	1141.46	0.702626	0.175285	0.610368	0.188962	4.00847	6.11132e-05	0.00816719	957.65	670.635	903.136	1120.63	1572.03	1380.42	1385.73
RPL19	ENSG00000108298	6143	ribosomal protein L19 [Source:HGNC Symbol;Acc:HGNC:10312]	protein_coding	24151.4	0.460873	0.11493	0.408436	0.120991	4.01003	6.07116e-05	0.00816719	20892.5	17734.7	21148.3	31480.6	26035.9	24707.7	27060.3
TMEM9	ENSG00000116857	252839	transmembrane protein 9 [Source:HGNC Symbol;Acc:HGNC:18823]	protein_coding	2499.8	0.524727	0.13108	0.459834	0.139285	4.0031	6.25177e-05	0.00824615	2200.37	1664.22	2147.86	2994.8	2820.8	2838.38	2832.14
GUK1	ENSG00000143774	2987	guanylate kinase 1 [Source:HGNC Symbol;Acc:HGNC:4693]	protein_coding	1960.5	0.641175	0.160302	0.55738	0.172202	3.99979	6.33977e-05	0.00828024	1577.31	1297.63	1595.75	2752.51	2402.33	1785.46	2312.5
MZT2A	ENSG00000173272	653784	mitotic spindle organizing protein 2A [Source:HGNC Symbol;Acc:HGNC:33187]	protein_coding	1616.82	0.604126	0.151205	0.526597	0.1619	3.99541	6.45816e-05	0.00835297	1377.58	1038.68	1334.5	1995.32	1628.49	2054.81	1888.31
SCG5	ENSG00000166922	6447	secretogranin V [Source:HGNC Symbol;Acc:HGNC:10816]	protein_coding	17.975	4.92379	1.23347	4.22635	1.30678	3.99183	6.55663e-05	0.00839879	1.70704	1.45474	0.448875	26.6528	14.3918	43.8714	37.2983
RPLP1	ENSG00000137818	6176	ribosomal protein lateral stalk subunit P1 [Source:HGNC Symbol;Acc:HGNC:10372]	protein_coding	21378.6	0.437751	0.109725	0.386659	0.115264	3.98951	6.62089e-05	0.00840034	18335.3	16234.9	18877.4	26009.5	25434.8	21027.7	23730.6
CAD	ENSG00000084774	790	carbamoyl-phosphate synthetase 2, aspartate transcarbamylase, and dihydroorotase [Source:HGNC Symbol;Acc:HGNC:1424]	protein_coding	1274.65	-0.582203	0.146024	-0.50782	0.154571	-3.98704	6.69034e-05	0.00840837	1363.93	1793.7	1556.25	1010.38	1091.57	1079.44	1027.28
TMEM100	ENSG00000166292	55273	transmembrane protein 100 [Source:HGNC Symbol;Acc:HGNC:25607]	protein_coding	21.3603	4.66449	1.17182	3.97159	1.28987	3.98055	6.87548e-05	0.0085603	1.70704	2.90948	0.448875	14.5379	14.3918	69.378	46.1488
EIF6	ENSG00000242372	3692	eukaryotic translation initiation factor 6 [Source:HGNC Symbol;Acc:HGNC:6159]	protein_coding	1256.17	0.707421	0.178322	0.611341	0.192731	3.96709	7.27543e-05	0.00883953	1133.47	657.543	987.973	1435.62	1556.53	1499.79	1522.28
TMEM101	ENSG00000091947	84336	transmembrane protein 101 [Source:HGNC Symbol;Acc:HGNC:28653]	protein_coding	930.467	0.667986	0.168506	0.578193	0.181664	3.96417	7.36517e-05	0.00883953	716.957	624.084	755.905	1083.07	928.827	1293.7	1110.73
NDUFS7	ENSG00000115286	374291	NADH:ubiquinone oxidoreductase core subunit S7 [Source:HGNC Symbol;Acc:HGNC:7714]	protein_coding	1172.87	0.640008	0.161354	0.554649	0.173693	3.96649	7.29404e-05	0.00883953	979.841	733.189	962.836	1503.46	1460.22	1201.87	1368.66
NPIPB11	ENSG00000254206	728888	nuclear pore complex interacting protein family member B11 [Source:HGNC Symbol;Acc:HGNC:37453]	protein_coding	361.236	-1.51316	0.381703	-1.28648	0.417652	-3.96424	7.36301e-05	0.00883953	237.279	896.12	579.946	302.873	112.921	232.62	166.894
RPL10A	ENSG00000198755	4736	ribosomal protein L10a [Source:HGNC Symbol;Acc:HGNC:10299]	protein_coding	12778.7	0.518387	0.130944	0.453223	0.139168	3.95884	7.53146e-05	0.0089584	11502	8447.68	10865.5	16946.3	14148.3	12982.9	14558.4
	ENSG00000274559	102724334	novel histone H2B family protein	protein_coding	54.1955	2.71906	0.687604	2.30556	0.772904	3.95439	7.67287e-05	0.00897716	20.4845	4.36422	14.8129	150.225	29.8907	62.2361	97.355
DHX8	ENSG00000067596	1659	DEAH-box helicase 8 [Source:HGNC Symbol;Acc:HGNC:2749]	protein_coding	1043.2	-0.68899	0.174247	-0.595639	0.18611	-3.95411	7.682e-05	0.00897716	1112.99	1556.57	1321.04	990.999	793.765	725.408	801.598
COL4A2	ENSG00000134871	1284	collagen type IV alpha 2 chain [Source:HGNC Symbol;Acc:HGNC:2203]	protein_coding	705.634	-0.66198	0.168007	-0.572798	0.179111	-3.9402	8.14141e-05	0.00943129	814.258	984.859	878.896	533.056	626.599	544.821	556.946
TMEM183A	ENSG00000163444	92703	transmembrane protein 183A [Source:HGNC Symbol;Acc:HGNC:20173]	protein_coding	1988.11	0.522516	0.132693	0.459282	0.141098	3.93778	8.22389e-05	0.00944471	1701.92	1368.91	1716.05	2369.68	2384.62	2123.17	2252.44
NPIPB12	ENSG00000169203	440353	nuclear pore complex interacting protein family member B12 [Source:HGNC Symbol;Acc:HGNC:37491]	protein_coding	743.25	-0.70472	0.179187	-0.607823	0.191694	-3.93287	8.39385e-05	0.00955751	812.551	1105.6	939.494	510.037	632.134	634.605	568.326
FANCD2	ENSG00000144554	2177	FA complementation group D2 [Source:HGNC Symbol;Acc:HGNC:3585]	protein_coding	1258.96	-0.58337	0.148778	-0.505477	0.1579	-3.92109	8.81507e-05	0.00995206	1333.2	1780.6	1544.13	998.268	1105.96	1036.59	1014.01
QARS1	ENSG00000172053	5859	glutaminyl-tRNA synthetase 1 [Source:HGNC Symbol;Acc:HGNC:9751]	protein_coding	3693.81	0.459037	0.117214	0.400654	0.123892	3.91623	8.99461e-05	0.0100694	3212.65	2669.45	3267.36	4398.92	4245.59	3958.63	4104.08
HILPDA	ENSG00000135245	29923	hypoxia inducible lipid droplet associated [Source:HGNC Symbol;Acc:HGNC:28859]	protein_coding	675.13	0.744867	0.19129	0.63753	0.208474	3.89392	9.86389e-05	0.0108189	518.94	413.146	534.161	993.422	739.519	721.327	805.391
BCAP31	ENSG00000185825	10134	B cell receptor associated protein 31 [Source:HGNC Symbol;Acc:HGNC:16695]	protein_coding	4821.97	0.424973	0.109088	0.37679	0.114535	3.89571	9.79133e-05	0.0108189	4163.47	3661.58	4298.87	5271.19	5795.48	5233.96	5329.24
CREBZF	ENSG00000137504	58487	CREB/ATF bZIP transcription factor [Source:HGNC Symbol;Acc:HGNC:24905]	protein_coding	1285.91	-0.541543	0.139113	-0.470202	0.147126	-3.89284	9.90767e-05	0.0108189	1640.47	1518.75	1535.15	1109.73	1172.38	959.049	1065.85
NPIPB4	ENSG00000185864	440345	nuclear pore complex interacting protein family member B4 [Source:HGNC Symbol;Acc:HGNC:41985]	protein_coding	1393.38	-0.577987	0.148591	-0.499501	0.157877	-3.88978	0.000100335	0.0108672	1495.37	1947.9	1702.13	1049.15	1156.88	1284.51	1117.69
RPL13	ENSG00000167526	6137	ribosomal protein L13 [Source:HGNC Symbol;Acc:HGNC:10303]	protein_coding	30130.7	0.462024	0.118871	0.40335	0.125712	3.88679	0.000101581	0.0109134	27186.3	21048.6	26283.8	38109.9	34076.6	30497.7	33712
RPL39	ENSG00000198918	6170	ribosomal protein L39 [Source:HGNC Symbol;Acc:HGNC:10350]	protein_coding	22538.6	0.593871	0.153099	0.523273	0.163936	3.87899	0.00010489	0.0111039	18417.3	15925	18141.7	32802.3	27284.7	18556.6	26642.4
DIAPH1	ENSG00000131504	1729	diaphanous related formin 1 [Source:HGNC Symbol;Acc:HGNC:2876]	protein_coding	1430.85	-0.518728	0.133749	-0.450431	0.141255	-3.87837	0.00010516	0.0111039	1633.64	1844.61	1704.38	1143.65	1327.37	1176.37	1185.96
WDR27	ENSG00000184465	253769	WD repeat domain 27 [Source:HGNC Symbol;Acc:HGNC:21248]	protein_coding	347.332	-1.004	0.25898	-0.854406	0.281017	-3.87677	0.000105854	0.0111039	339.701	638.631	478.949	233.818	287.837	220.377	232.008
ESRRG	ENSG00000196482	2104	estrogen related receptor gamma [Source:HGNC Symbol;Acc:HGNC:3474]	protein_coding	23.2784	5.57455	1.44211	4.53902	1.69805	3.86555	0.000110838	0.0114742	1.70704	1.45474	0	20.5953	59.7815	1.02026	78.3897
SNX29	ENSG00000048471	92017	sorting nexin 29 [Source:HGNC Symbol;Acc:HGNC:30542]	protein_coding	156.885	1.85542	0.480063	1.56673	0.536812	3.86496	0.000111108	0.0114742	17.0704	109.106	62.8424	124.784	208.128	305.059	271.203
NOA1	ENSG00000084092	84273	nitric oxide associated 1 [Source:HGNC Symbol;Acc:HGNC:28473]	protein_coding	829.062	0.74953	0.194576	0.638479	0.212457	3.85212	0.000117102	0.0120002	734.027	417.511	648.175	980.096	977.538	1026.39	1019.7
FAR2	ENSG00000064763	55711	fatty acyl-CoA reductase 2 [Source:HGNC Symbol;Acc:HGNC:25531]	protein_coding	176.29	1.42969	0.37176	1.20417	0.415438	3.84574	0.000120191	0.0121989	56.3323	113.47	100.997	185.358	353.154	164.263	260.456
ATRAID	ENSG00000138085	51374	all-trans retinoic acid induced differentiation factor [Source:HGNC Symbol;Acc:HGNC:24090]	protein_coding	1524.2	0.746638	0.194217	0.64177	0.211296	3.84435	0.000120871	0.0121989	1437.33	717.187	1154.51	1693.66	1977.22	1788.52	1900.95
RPS12	ENSG00000112306	6206	ribosomal protein S12 [Source:HGNC Symbol;Acc:HGNC:10385]	protein_coding	10953	0.521614	0.135943	0.446263	0.145234	3.837	0.000124547	0.0124753	8760.53	8399.67	9211.8	14098.1	14060.8	9491.52	12648.6
TMSB15A	ENSG00000158164	11013	thymosin beta 15A [Source:HGNC Symbol;Acc:HGNC:30744]	protein_coding	249.504	1.29532	0.337994	1.08966	0.378002	3.83239	0.000126906	0.0125108	153.634	107.651	150.373	528.21	219.199	239.762	347.696
POLR1H	ENSG00000066379	30834	RNA polymerase I subunit H [Source:HGNC Symbol;Acc:HGNC:13182]	protein_coding	562.331	0.805913	0.210407	0.684693	0.230667	3.83026	0.000128007	0.0125108	377.256	381.142	428.226	563.343	891.187	597.875	697.289
RPL28	ENSG00000108107	6158	ribosomal protein L28 [Source:HGNC Symbol;Acc:HGNC:10330]	protein_coding	9173.4	0.487767	0.127305	0.4229	0.135249	3.83149	0.000127369	0.0125108	8506.18	6102.64	7818.5	10377.6	9495.29	11418.8	10494.7
THRAP3	ENSG00000054118	9967	thyroid hormone receptor associated protein 3 [Source:HGNC Symbol;Acc:HGNC:22964]	protein_coding	2074.14	-0.553901	0.144659	-0.477351	0.153777	-3.82901	0.000128658	0.0125108	2236.22	2838.2	2524.47	1683.97	2037	1523.25	1675.9
NDUFB7	ENSG00000099795	4713	NADH:ubiquinone oxidoreductase subunit B7 [Source:HGNC Symbol;Acc:HGNC:7702]	protein_coding	2028.83	0.744384	0.194795	0.633646	0.212643	3.82137	0.000132711	0.0127199	1882.87	992.133	1530.66	3005.71	2117.81	2166.02	2506.57
SSR4	ENSG00000180879	6748	signal sequence receptor subunit 4 [Source:HGNC Symbol;Acc:HGNC:11326]	protein_coding	3789.27	0.631584	0.165349	0.538581	0.178983	3.81971	0.000133609	0.0127199	3487.48	2166.11	3020.48	5159.74	4613.14	3569.91	4508.04
PARK7	ENSG00000116288	11315	Parkinsonism associated deglycase [Source:HGNC Symbol;Acc:HGNC:16369]	protein_coding	3039.41	0.556204	0.145619	0.478644	0.15636	3.81959	0.000133672	0.0127199	2741.51	1920.26	2543.32	3955.52	3529.32	3081.2	3504.78
LGI2	ENSG00000153012	55203	leucine rich repeat LGI family member 2 [Source:HGNC Symbol;Acc:HGNC:18710]	protein_coding	72.1612	2.23172	0.585438	1.86689	0.663183	3.81205	0.000137819	0.0129654	13.6563	29.0948	27.8302	155.071	30.9978	121.411	127.067
INIP	ENSG00000148153	58493	INTS3 and NABP interacting protein [Source:HGNC Symbol;Acc:HGNC:24994]	protein_coding	469.81	0.771841	0.20251	0.654564	0.22234	3.81137	0.000138199	0.0129654	331.166	301.131	376.157	616.649	621.063	475.443	567.061
RPL23A	ENSG00000198242	6147	ribosomal protein L23a [Source:HGNC Symbol;Acc:HGNC:10317]	protein_coding	19851.7	0.557888	0.146772	0.479504	0.157605	3.80105	0.000144087	0.0134233	17572.3	13107.2	16319.7	28889.2	21337.6	18623.9	23111.7
ZBTB7A	ENSG00000178951	51341	zinc finger and BTB domain containing 7A [Source:HGNC Symbol;Acc:HGNC:18078]	protein_coding	346.566	-0.827109	0.217797	-0.700505	0.235926	-3.79762	0.000146092	0.0135155	443.83	491.702	448.426	242.298	304.443	236.701	258.56
RPL15	ENSG00000174748	6138	ribosomal protein L15 [Source:HGNC Symbol;Acc:HGNC:10306]	protein_coding	24178.7	0.41259	0.108811	0.373494	0.114244	3.79181	0.000149552	0.0137402	21005.1	18577	21538.8	27766.1	29822.1	23861.9	26679.7
POGZ	ENSG00000143442	23126	pogo transposable element derived with ZNF domain [Source:HGNC Symbol;Acc:HGNC:18801]	protein_coding	991.16	-0.529491	0.139741	-0.456226	0.148211	-3.78908	0.000151204	0.0137969	1200.05	1224.89	1179.19	808.064	834.727	866.205	824.989
NLE1	ENSG00000073536	54475	notchless homolog 1 [Source:HGNC Symbol;Acc:HGNC:19889]	protein_coding	720.848	0.811361	0.214327	0.682951	0.235682	3.78562	0.000153323	0.0138951	573.565	405.873	539.547	821.391	654.275	1131.47	919.815
TSPO	ENSG00000100300	706	translocator protein [Source:HGNC Symbol;Acc:HGNC:1158]	protein_coding	1709.47	0.646355	0.171076	0.551348	0.185786	3.77817	0.000157986	0.0140519	1563.65	955.765	1369.07	2289.72	1793.44	1960.95	2033.71
SRRM2	ENSG00000167978	23524	serine/arginine repetitive matrix 2 [Source:HGNC Symbol;Acc:HGNC:16639]	protein_coding	4634.18	-0.609051	0.161174	-0.520437	0.172818	-3.77885	0.000157554	0.0140519	4597.06	6850.37	5830.88	3055.38	4691.74	3851.5	3562.31
MDN1	ENSG00000112159	23195	midasin AAA ATPase 1 [Source:HGNC Symbol;Acc:HGNC:18302]	protein_coding	1048.32	-0.614247	0.162594	-0.525192	0.174172	-3.7778	0.000158218	0.0140519	1083.97	1533.3	1299.49	814.122	849.118	929.461	828.782
ZNF142	ENSG00000115568	7701	zinc finger protein 142 [Source:HGNC Symbol;Acc:HGNC:12927]	protein_coding	489.978	-0.725257	0.192235	-0.615073	0.207475	-3.77277	0.000161446	0.0142436	706.715	580.441	610.02	339.217	396.329	420.349	376.776
PIN1	ENSG00000127445	5300	peptidylprolyl cis/trans isomerase, NIMA-interacting 1 [Source:HGNC Symbol;Acc:HGNC:8988]	protein_coding	1183.67	0.675951	0.179409	0.572995	0.195609	3.76764	0.000164796	0.0144435	1065.19	651.724	939.943	1457.42	1225.52	1522.23	1423.66
RPRD2	ENSG00000163125	23248	regulation of nuclear pre-mRNA domain containing 2 [Source:HGNC Symbol;Acc:HGNC:29039]	protein_coding	777.192	-0.660993	0.175553	-0.561931	0.188861	-3.76521	0.00016641	0.0144896	1056.66	926.67	965.529	518.518	742.84	621.341	608.785
MECR	ENSG00000116353	51102	mitochondrial trans-2-enoyl-CoA reductase [Source:HGNC Symbol;Acc:HGNC:19691]	protein_coding	676.014	0.809914	0.215357	0.682409	0.23731	3.7608	0.000169371	0.0146517	448.952	461.153	514.859	1028.56	552.425	873.346	852.804
RPS7	ENSG00000171863	6201	ribosomal protein S7 [Source:HGNC Symbol;Acc:HGNC:10440]	protein_coding	13802.8	0.525642	0.140039	0.450289	0.150145	3.75353	0.000174362	0.0149861	11705.2	9887.87	11571.1	19214.2	16159.8	12216.6	15864.4
EEF1D	ENSG00000104529	1936	eukaryotic translation elongation factor 1 delta [Source:HGNC Symbol;Acc:HGNC:3211]	protein_coding	4472.24	0.386434	0.103368	0.341287	0.108275	3.73844	0.000185164	0.0158125	3723.05	3651.4	4060.52	5183.97	4823.48	4986.03	4877.23
MLXIP	ENSG00000175727	22877	MLX interacting protein [Source:HGNC Symbol;Acc:HGNC:17055]	protein_coding	774.951	-0.650054	0.173997	-0.551273	0.18733	-3.73601	0.000186961	0.0158643	867.176	1093.96	968.222	558.497	600.029	730.509	606.256
TTC38	ENSG00000075234	55020	tetratricopeptide repeat domain 38 [Source:HGNC Symbol;Acc:HGNC:26082]	protein_coding	560.659	0.883248	0.238322	0.738837	0.264375	3.70611	0.000210465	0.0176341	368.721	369.504	402.192	542.748	521.427	983.535	736.484
SLC41A1	ENSG00000133065	254428	solute carrier family 41 member 1 [Source:HGNC Symbol;Acc:HGNC:19429]	protein_coding	914.115	-0.643826	0.173658	-0.544016	0.187253	-3.70743	0.00020937	0.0176341	1087.38	1214.71	1146.87	609.38	716.271	911.096	713.094
PRSS53	ENSG00000151006	339105	serine protease 53 [Source:HGNC Symbol;Acc:HGNC:34407]	protein_coding	34.0696	-2.69864	0.728812	-0.0958764	0.188831	-3.70279	0.000213242	0.0176448	66.5746	66.9181	63.7402	7.26894	3.32119	22.4458	8.21828
CLTC	ENSG00000141367	1213	clathrin heavy chain [Source:HGNC Symbol;Acc:HGNC:2092]	protein_coding	3290.63	-0.492751	0.133027	-0.422009	0.140996	-3.70415	0.000212097	0.0176448	3630.87	4265.3	3916.88	3147.45	3007.89	2339.47	2726.57
HSD17B1	ENSG00000108786	3292	hydroxysteroid 17-beta dehydrogenase 1 [Source:HGNC Symbol;Acc:HGNC:5210]	protein_coding	20.4791	5.27967	1.42971	4.09086	1.7835	3.69282	0.00022178	0.0180761	1.70704	1.45474	0	1.21149	40.9614	18.3648	79.6541
TCP11L2	ENSG00000166046	255394	t-complex 11 like 2 [Source:HGNC Symbol;Acc:HGNC:28627]	protein_coding	49.1347	2.08649	0.565144	1.70856	0.652767	3.69197	0.000222525	0.0180761	13.6563	16.0021	22.8926	70.2664	52.032	93.8643	75.2289
CD151	ENSG00000177697	977	CD151 molecule (Raph blood group) [Source:HGNC Symbol;Acc:HGNC:1630]	protein_coding	1650.04	0.537082	0.145408	0.457014	0.156648	3.69363	0.000221075	0.0180761	1439.03	1112.88	1394.65	1898.41	1697.13	2107.87	1900.32
PRDX5	ENSG00000126432	25824	peroxiredoxin 5 [Source:HGNC Symbol;Acc:HGNC:9355]	protein_coding	4215.11	0.558691	0.151467	0.471727	0.16375	3.68854	0.000225548	0.0182106	3953.5	2548.71	3475.64	5620.1	4628.64	4372.85	4906.31
SIGIRR	ENSG00000185187	59307	single Ig and TIR domain containing [Source:HGNC Symbol;Acc:HGNC:30575]	protein_coding	442.249	1.05257	0.286005	0.871916	0.321454	3.68025	0.000233006	0.0184766	387.498	149.838	289.524	691.761	443.933	537.679	595.509
SIVA1	ENSG00000184990	10572	SIVA1 apoptosis inducing factor [Source:HGNC Symbol;Acc:HGNC:17712]	protein_coding	1654.12	0.746542	0.202844	0.628078	0.223259	3.68038	0.00023289	0.0184766	1567.06	782.65	1238	2179.47	2183.13	1578.35	2050.14
MTR	ENSG00000116984	4548	5-methyltetrahydrofolate-homocysteine methyltransferase [Source:HGNC Symbol;Acc:HGNC:7468]	protein_coding	1311	-0.652516	0.177435	-0.549349	0.191935	-3.67748	0.000235546	0.0184766	1220.53	2074.46	1661.28	1000.69	1088.24	1130.45	1001.37
LRRC37A2	ENSG00000238083	474170	leucine rich repeat containing 37 member A2 [Source:HGNC Symbol;Acc:HGNC:32404]	protein_coding	434.137	-0.94133	0.255989	-0.782509	0.28153	-3.67723	0.000235777	0.0184766	464.315	734.644	589.821	399.792	343.19	213.235	293.961
RPS17	ENSG00000182774	6218	ribosomal protein S17 [Source:HGNC Symbol;Acc:HGNC:10397]	protein_coding	222.607	-1.00061	0.271958	-0.831421	0.299028	-3.67929	0.000233882	0.0184766	349.943	286.584	297.604	175.666	173.809	120.391	154.251
TUBA1B	ENSG00000123416	10376	tubulin alpha 1b [Source:HGNC Symbol;Acc:HGNC:18809]	protein_coding	20609.3	0.341815	0.0930242	0.298484	0.0965723	3.67447	0.000238341	0.0185683	16766.5	18139.2	18822.2	22716.7	23596	21819.4	22404.9
CKS2	ENSG00000123975	1164	CDC28 protein kinase regulatory subunit 2 [Source:HGNC Symbol;Acc:HGNC:2000]	protein_coding	2716.93	0.638731	0.174138	0.534057	0.191046	3.66797	0.000244486	0.0189363	2342.06	1624.95	2231.8	4068.18	3177.28	2463.94	3110.3
EEF1A1	ENSG00000156508	1915	eukaryotic translation elongation factor 1 alpha 1 [Source:HGNC Symbol;Acc:HGNC:3189]	protein_coding	88739.5	0.445915	0.121708	0.381974	0.129203	3.66381	0.000248494	0.0191355	70504.2	73433.8	77092.9	121360	93556.9	85088	100141
ATP5MC2	ENSG00000135390	517	ATP synthase membrane subunit c locus 2 [Source:HGNC Symbol;Acc:HGNC:842]	protein_coding	6172.96	0.44528	0.121704	0.381855	0.129393	3.65872	0.000253474	0.0194068	5602.51	4345.31	5433.63	7702.66	6682.24	6569.48	6874.91
COQ2	ENSG00000173085	27235	coenzyme Q2, polyprenyltransferase [Source:HGNC Symbol;Acc:HGNC:25223]	protein_coding	488.306	0.725297	0.198472	0.605223	0.219286	3.6544	0.00025778	0.0194326	353.357	325.862	391.867	597.265	494.858	668.273	586.659
DDX39A	ENSG00000123136	10212	DExD-box helicase 39A [Source:HGNC Symbol;Acc:HGNC:17821]	protein_coding	2178.48	0.47766	0.130723	0.409196	0.139531	3.654	0.000258187	0.0194326	1773.61	1696.23	1881.23	2167.36	2809.73	2437.41	2483.82
GXYLT1	ENSG00000151233	283464	glucoside xylosyltransferase 1 [Source:HGNC Symbol;Acc:HGNC:27482]	protein_coding	522.398	-0.668411	0.182831	-0.560781	0.197888	-3.6559	0.000256286	0.0194326	650.382	695.366	640.544	467.635	412.935	376.478	413.443
NUDT1	ENSG00000106268	4521	nudix hydrolase 1 [Source:HGNC Symbol;Acc:HGNC:8048]	protein_coding	695.019	0.747583	0.204728	0.623616	0.226533	3.65159	0.000260623	0.0195057	619.656	350.592	538.201	898.926	831.405	780.502	845.85
SMIM43	ENSG00000164112	132332	small integral membrane protein 43 [Source:HGNC Symbol;Acc:HGNC:55077]	protein_coding	23.9334	5.72143	1.57048	4.57465	1.8681	3.64312	0.000269353	0.0200462	1.70704	1.45474	0	1.21149	107.385	2.04053	53.7349
FAM160B2	ENSG00000158863	64760	family with sequence similarity 160 member B2 [Source:HGNC Symbol;Acc:HGNC:16492]	protein_coding	265.488	-0.945956	0.259757	-0.782755	0.286114	-3.64169	0.000270855	0.0200462	341.408	401.508	353.713	168.397	247.982	160.182	185.227
NLRP14	ENSG00000158077	338323	NLR family pyrin domain containing 14 [Source:HGNC Symbol;Acc:HGNC:22939]	protein_coding	12.7028	5.22744	1.43702	4.22578	1.72629	3.63771	0.000275074	0.0201262	0	0	1.34662	29.0758	27.6766	11.2229	19.5974
RNASEH2C	ENSG00000172922	84153	ribonuclease H2 subunit C [Source:HGNC Symbol;Acc:HGNC:24116]	protein_coding	1708.72	0.550717	0.151447	0.461423	0.164223	3.63637	0.000276512	0.0201262	1531.21	1089.6	1439.99	2124.95	2052.5	1763.02	1959.74
CDKN2A	ENSG00000147889	1029	cyclin dependent kinase inhibitor 2A [Source:HGNC Symbol;Acc:HGNC:1787]	protein_coding	5680.04	0.539324	0.148373	0.449064	0.160666	3.63493	0.000278056	0.0201262	5407.9	3437.55	4717.22	7420.38	6308.05	5905.29	6563.88
UBB	ENSG00000170315	7314	ubiquitin B [Source:HGNC Symbol;Acc:HGNC:12463]	protein_coding	17861.6	0.355485	0.0978325	0.309427	0.102067	3.63361	0.000279489	0.0201262	15776.5	14202.6	16316.1	19280.9	19039.3	21031.7	19383.8
GAPDH	ENSG00000111640	2597	glyceraldehyde-3-phosphate dehydrogenase [Source:HGNC Symbol;Acc:HGNC:4141]	protein_coding	35604.1	0.337029	0.0927099	0.303046	0.0961619	3.6353	0.000277657	0.0201262	30137.8	29717.4	33186.6	38413.9	41270.3	38526.2	37976.7
EIF4G1	ENSG00000114867	1981	eukaryotic translation initiation factor 4 gamma 1 [Source:HGNC Symbol;Acc:HGNC:3296]	protein_coding	3404.89	-0.46167	0.127173	-0.394691	0.134558	-3.63024	0.000283161	0.0201726	3490.9	4560.61	4044.36	2719.8	3182.81	2998.56	2837.2
TJP1	ENSG00000104067	7082	tight junction protein 1 [Source:HGNC Symbol;Acc:HGNC:11827]	protein_coding	697.656	-0.588947	0.162195	-0.495542	0.1745	-3.6311	0.000282211	0.0201726	838.157	904.849	843.435	597.265	524.749	608.078	567.061
MIF	ENSG00000240972	4282	macrophage migration inhibitory factor [Source:HGNC Symbol;Acc:HGNC:7097]	protein_coding	3863.39	0.502681	0.138827	0.426369	0.149251	3.62092	0.000293561	0.0208022	3671.84	2429.42	3280.38	4453.44	4392.83	4404.48	4411.32
PRPS1	ENSG00000147224	5631	phosphoribosyl pyrophosphate synthetase 1 [Source:HGNC Symbol;Acc:HGNC:9462]	protein_coding	3329.11	0.435431	0.120355	0.369409	0.127922	3.6179	0.000297003	0.0208246	2633.96	2758.19	2938.33	3782.27	4168.1	3302.6	3720.35
GGT1	ENSG00000100031	2678	gamma-glutamyltransferase 1 [Source:HGNC Symbol;Acc:HGNC:4250]	protein_coding	14.6082	-4.9403	1.36502	-0.0346552	0.135884	-3.61922	0.000295489	0.0208246	1.70704	58.1896	36.8077	1.21149	3.32119	1.02026	0
SRSF3	ENSG00000112081	6428	serine and arginine rich splicing factor 3 [Source:HGNC Symbol;Acc:HGNC:10785]	protein_coding	5864.48	0.39109	0.1083	0.338704	0.113887	3.61118	0.000304805	0.0212598	5073.32	4643.53	5248.69	5993.24	7128.39	6478.68	6485.49
DCXR	ENSG00000169738	51181	dicarbonyl and L-xylulose reductase [Source:HGNC Symbol;Acc:HGNC:18985]	protein_coding	1352.84	0.566803	0.157313	0.472737	0.171289	3.60302	0.000314541	0.0215996	1189.81	868.48	1133.41	1743.33	1389.37	1586.51	1558.94
RPL35A	ENSG00000182899	6165	ribosomal protein L35a [Source:HGNC Symbol;Acc:HGNC:10345]	protein_coding	7768.37	0.517336	0.14348	0.437301	0.154726	3.60562	0.000311407	0.0215996	6951.07	5253.07	6530.23	10954.3	8317.38	7468.34	8904.19
HUWE1	ENSG00000086758	10075	HECT, UBA and WWE domain containing E3 ubiquitin protein ligase 1 [Source:HGNC Symbol;Acc:HGNC:30892]	protein_coding	3946.22	-0.451564	0.125296	-0.374595	0.132546	-3.60397	0.000313389	0.0215996	4021.79	5273.43	4675.03	3154.72	3589.1	3615.82	3293.63
RPS19BP1	ENSG00000187051	91582	ribosomal protein S19 binding protein 1 [Source:HGNC Symbol;Acc:HGNC:28749]	protein_coding	1683.68	0.595988	0.16559	0.498804	0.180839	3.59918	0.000319226	0.0218088	1555.11	989.224	1374.9	2223.08	1791.23	1877.29	1974.92
MRAP2	ENSG00000135324	112609	melanocortin 2 receptor accessory protein 2 [Source:HGNC Symbol;Acc:HGNC:21232]	protein_coding	17.4731	3.96451	1.1045	3.18334	1.29273	3.58941	0.000331421	0.0224182	3.41408	2.90948	0.448875	36.3447	13.2848	33.6687	32.2409
NCAPH2	ENSG00000025770	29781	non-SMC condensin II complex subunit H2 [Source:HGNC Symbol;Acc:HGNC:25071]	protein_coding	1142.04	0.644038	0.17943	0.535008	0.197171	3.58934	0.000331511	0.0224182	821.086	868.48	910.318	1463.48	969.789	1585.49	1375.61
MACF1	ENSG00000127603	23499	microtubule actin crosslinking factor 1 [Source:HGNC Symbol;Acc:HGNC:13664]	protein_coding	1127.63	-0.605192	0.168722	-0.505979	0.182594	-3.58692	0.000334603	0.022513	1171.03	1630.76	1398.24	829.871	1093.78	881.509	888.206
MMP24	ENSG00000125966	10893	matrix metallopeptidase 24 [Source:HGNC Symbol;Acc:HGNC:7172]	protein_coding	14.6226	-4.89663	1.3658	-0.034069	0.135637	-3.58517	0.00033686	0.022551	1.70704	56.7349	38.1543	3.63447	1.10706	1.02026	0
ZNF555	ENSG00000186300	148254	zinc finger protein 555 [Source:HGNC Symbol;Acc:HGNC:28382]	protein_coding	138.762	-1.17528	0.32801	-0.959872	0.365485	-3.58306	0.000339586	0.0226198	242.4	174.569	193.465	106.611	86.351	77.5401	90.4011
CDH1	ENSG00000039068	999	cadherin 1 [Source:HGNC Symbol;Acc:HGNC:1748]	protein_coding	22.5143	5.30984	1.48628	3.97337	1.94373	3.57257	0.000353489	0.0228977	1.70704	1.45474	0	1.21149	56.4603	5.10132	91.6654
LCMT1	ENSG00000205629	51451	leucine carboxyl methyltransferase 1 [Source:HGNC Symbol;Acc:HGNC:17557]	protein_coding	547.742	0.640141	0.179098	0.533622	0.197278	3.57425	0.000351239	0.0228977	418.225	373.868	457.403	634.821	674.202	639.706	635.968
RPLP0	ENSG00000089157	6175	ribosomal protein lateral stalk subunit P0 [Source:HGNC Symbol;Acc:HGNC:10371]	protein_coding	30250	0.402901	0.112887	0.345155	0.119098	3.56906	0.000358269	0.0228977	25170.3	25133.6	26479.1	29639.1	39508.9	31707.8	34110.9
MSI2	ENSG00000153944	124540	musashi RNA binding protein 2 [Source:HGNC Symbol;Acc:HGNC:18585]	protein_coding	841.586	-0.532958	0.149171	-0.448241	0.159809	-3.5728	0.000353182	0.0228977	1043	1018.32	1002.79	669.954	706.307	750.915	699.818
SPTAN1	ENSG00000197694	6709	spectrin alpha, non-erythrocytic 1 [Source:HGNC Symbol;Acc:HGNC:11273]	protein_coding	2389.62	-0.533134	0.14909	-0.452736	0.159908	-3.57591	0.000349014	0.0228977	2342.06	3437.55	2913.2	1835.41	2250.66	2027.27	1921.18
GOLGA8A	ENSG00000175265	23015	golgin A8 family member A [Source:HGNC Symbol;Acc:HGNC:31972]	protein_coding	1264.68	-0.612614	0.171599	-0.50998	0.18611	-3.57003	0.000356939	0.0228977	1201.76	1933.35	1586.32	1044.3	1117.03	982.515	987.458
EP400	ENSG00000183495	57634	E1A binding protein p400 [Source:HGNC Symbol;Acc:HGNC:11958]	protein_coding	709.046	-0.615137	0.172387	-0.512685	0.1868	-3.56836	0.000359227	0.0228977	769.875	1009.59	870.368	545.171	631.027	573.389	563.9
HCFC1	ENSG00000172534	3054	host cell factor C1 [Source:HGNC Symbol;Acc:HGNC:4839]	protein_coding	1014.89	-0.646697	0.180775	-0.537003	0.196612	-3.57737	0.000347074	0.0228977	1194.93	1366	1269.42	766.873	663.132	1063.12	780.736
TNKS1BP1	ENSG00000149115	85456	tankyrase 1 binding protein 1 [Source:HGNC Symbol;Acc:HGNC:19081]	protein_coding	455.102	-0.8153	0.228394	-0.670329	0.251785	-3.56971	0.000357379	0.0228977	435.295	779.741	592.963	364.659	350.939	334.647	327.467
GSTZ1	ENSG00000100577	2954	glutathione S-transferase zeta 1 [Source:HGNC Symbol;Acc:HGNC:4643]	protein_coding	714.349	0.630902	0.177215	0.523013	0.195318	3.56009	0.00037073	0.0232161	512.112	525.161	600.145	988.576	813.692	724.388	836.368
EIF3K	ENSG00000178982	27335	eukaryotic translation initiation factor 3 subunit K [Source:HGNC Symbol;Acc:HGNC:24656]	protein_coding	3565.42	0.45958	0.129193	0.389232	0.138282	3.55731	0.000374677	0.0232161	3262.15	2446.87	3118.78	4386.81	3943.36	3809.67	3990.29
PCNA	ENSG00000132646	5111	proliferating cell nuclear antigen [Source:HGNC Symbol;Acc:HGNC:8729]	protein_coding	4884.1	0.395428	0.111113	0.347798	0.11689	3.55881	0.000372541	0.0232161	4071.29	4028.18	4340.17	4868.98	5991.43	5443.11	5445.56
IMPDH2	ENSG00000178035	3615	inosine monophosphate dehydrogenase 2 [Source:HGNC Symbol;Acc:HGNC:6053]	protein_coding	8332.09	0.361064	0.101485	0.301551	0.106371	3.55782	0.000373951	0.0232161	7316.37	6617.61	7608.87	8779.67	9757.67	9201.77	9042.63
PABPC4	ENSG00000090621	8761	poly(A) binding protein cytoplasmic 4 [Source:HGNC Symbol;Acc:HGNC:8557]	protein_coding	1575.85	-0.466586	0.131147	-0.395022	0.139213	-3.55773	0.00037407	0.0232161	1882.87	1872.25	1854.75	1229.66	1355.05	1506.93	1329.46
ARHGAP35	ENSG00000160007	2909	Rho GTPase activating protein 35 [Source:HGNC Symbol;Acc:HGNC:4591]	protein_coding	976.613	-0.560953	0.157611	-0.468875	0.169786	-3.55909	0.000372141	0.0232161	1036.17	1367.46	1181.89	770.508	819.228	873.346	787.69
SPTBN1	ENSG00000115306	6711	spectrin beta, non-erythrocytic 1 [Source:HGNC Symbol;Acc:HGNC:11275]	protein_coding	1661.17	-0.575753	0.161983	-0.479984	0.175057	-3.55441	0.000378834	0.023365	1655.83	2419.23	2052.7	1179.99	1555.43	1453.88	1311.13
SLC25A6	ENSG00000169100	293	solute carrier family 25 member 6 [Source:HGNC Symbol;Acc:HGNC:10992]	protein_coding	6644.22	0.435938	0.122768	0.3729	0.130462	3.55091	0.000383906	0.0235686	5629.82	5289.44	5702.05	6159.22	7600	8510.03	7618.98
TMEM126A	ENSG00000171202	84233	transmembrane protein 126A [Source:HGNC Symbol;Acc:HGNC:25382]	protein_coding	193.668	1.31621	0.370995	1.05962	0.429263	3.54778	0.000388494	0.0236325	146.805	56.7349	112.219	356.178	247.982	168.344	267.41
CD320	ENSG00000167775	51293	CD320 molecule [Source:HGNC Symbol;Acc:HGNC:16692]	protein_coding	1153.19	0.548394	0.154557	0.458238	0.168109	3.54816	0.000387933	0.0236325	943.993	827.747	972.711	1268.43	1175.7	1546.72	1337.05
CACNA1C	ENSG00000151067	775	calcium voltage-gated channel subunit alpha1 C [Source:HGNC Symbol;Acc:HGNC:1390]	protein_coding	23.2449	5.63721	1.59638	4.36689	1.98766	3.53124	0.00041362	0.0246777	1.70704	1.45474	0	1.21149	98.5287	1.02026	58.7923
TSSC4	ENSG00000184281	10078	tumor suppressing subtransferable candidate 4 [Source:HGNC Symbol;Acc:HGNC:12386]	protein_coding	474.855	1.04997	0.297302	0.850065	0.339628	3.53165	0.00041298	0.0246777	353.357	226.94	307.479	965.558	404.079	422.39	644.187
ALG3	ENSG00000214160	10195	ALG3 alpha-1,3- mannosyltransferase [Source:HGNC Symbol;Acc:HGNC:23056]	protein_coding	633.534	0.924401	0.261817	0.752096	0.296431	3.53071	0.000414449	0.0246777	587.222	244.396	430.471	694.184	643.204	990.677	844.586
TXNDC17	ENSG00000129235	84817	thioredoxin domain containing 17 [Source:HGNC Symbol;Acc:HGNC:28218]	protein_coding	833.117	0.701075	0.19863	0.56943	0.221673	3.52954	0.00041628	0.0246777	684.523	506.25	655.806	1233.3	1000.79	752.955	998.205
ID2	ENSG00000115738	3398	inhibitor of DNA binding 2 [Source:HGNC Symbol;Acc:HGNC:5361]	protein_coding	2833.78	0.568942	0.16126	0.47254	0.176237	3.52811	0.000418537	0.0246777	2661.28	1691.86	2322.48	3819.83	3228.2	2812.87	3299.95
MT-CO2	ENSG00000198712	4513	mitochondrially encoded cytochrome c oxidase II [Source:HGNC Symbol;Acc:HGNC:7421]	protein_coding	75027.5	0.553958	0.156879	0.461914	0.170638	3.53112	0.000413809	0.0246777	74654	42895.9	60373.6	77440.9	101197	78920.5	89710.7
FSTL4	ENSG00000053108	23105	follistatin like 4 [Source:HGNC Symbol;Acc:HGNC:21389]	protein_coding	8.30488	6.24682	1.77062	0.0227606	0.131967	3.52804	0.000418643	0.0246777	0	0	0	8.48043	17.713	9.18238	22.7583
DRAM2	ENSG00000156171	128338	DNA damage regulated autophagy modulator 2 [Source:HGNC Symbol;Acc:HGNC:28769]	protein_coding	651.927	0.773032	0.219302	0.631468	0.24613	3.52497	0.000423533	0.024856	524.061	373.868	499.597	1030.98	737.305	594.814	802.863
GHITM	ENSG00000165678	27069	growth hormone inducible transmembrane protein [Source:HGNC Symbol;Acc:HGNC:17281]	protein_coding	2881.79	0.522462	0.148267	0.43745	0.160782	3.52378	0.000425437	0.0248582	2674.93	1824.24	2438.74	3722.91	3261.41	2933.26	3317.02
FPGT-TNNI3K	ENSG00000259030	100526835	FPGT-TNNI3K readthrough [Source:HGNC Symbol;Acc:HGNC:42952]	protein_coding	8.19721	-6.01091	1.70659	-0.0286612	0.133738	-3.52217	0.000428027	0.0249004	32.4338	13.0927	11.2219	0	0	0	0.632175
WARS2	ENSG00000116874	10352	tryptophanyl tRNA synthetase 2, mitochondrial [Source:HGNC Symbol;Acc:HGNC:12730]	protein_coding	458.994	0.885279	0.25162	0.718398	0.285342	3.51831	0.000434298	0.0250844	389.205	210.937	332.167	725.683	504.821	467.281	582.866
OGT	ENSG00000147162	8473	O-linked N-acetylglucosamine (GlcNAc) transferase [Source:HGNC Symbol;Acc:HGNC:8127]	protein_coding	4026.31	-0.440542	0.125269	-0.370398	0.132623	-3.51677	0.00043684	0.0250844	4161.76	5301.07	4737.42	3625.99	3821.59	3148.54	3387.83
CREBBP	ENSG00000005339	1387	CREB binding protein [Source:HGNC Symbol;Acc:HGNC:2348]	protein_coding	685.43	-0.607371	0.172687	-0.502701	0.187531	-3.51718	0.000436164	0.0250844	740.855	974.676	839.844	530.633	577.888	586.652	547.464
RAN	ENSG00000132341	5901	RAN, member RAS oncogene family [Source:HGNC Symbol;Acc:HGNC:9846]	protein_coding	10503	0.402644	0.114634	0.341027	0.121337	3.51242	0.000444044	0.0253886	9656.73	7638.84	9368.46	12781.2	11554.4	10946.4	11575.1
TMEM205	ENSG00000105518	374882	transmembrane protein 205 [Source:HGNC Symbol;Acc:HGNC:29631]	protein_coding	1135.52	0.576029	0.164139	0.476813	0.180003	3.5094	0.000449111	0.0255686	889.368	823.383	954.756	1587.05	1293.05	1088.62	1312.4
CNTNAP3C	ENSG00000283378	100289279	contactin associated protein family member 3C [Source:HGNC Symbol;Acc:HGNC:53878]	protein_coding	19.5574	5.0995	1.45606	3.70582	1.957	3.50225	0.000461343	0.0258236	1.70704	1.45474	0	4.84596	44.2826	3.06079	81.5506
NDUFA11	ENSG00000174886	126328	NADH:ubiquinone oxidoreductase subunit A11 [Source:HGNC Symbol;Acc:HGNC:20371]	protein_coding	877.351	0.684729	0.195401	0.560889	0.217571	3.50423	0.000457932	0.0258236	800.602	469.881	689.022	1102.46	1130.31	902.934	1046.25
SLC7A1	ENSG00000139514	6541	solute carrier family 7 member 1 [Source:HGNC Symbol;Acc:HGNC:11057]	protein_coding	2128.53	-0.466808	0.133268	-0.391961	0.141886	-3.50277	0.000460447	0.0258236	2401.81	2649.08	2524.92	1562.82	2010.43	1974.21	1776.41
RNF213	ENSG00000173821	57674	ring finger protein 213 [Source:HGNC Symbol;Acc:HGNC:14539]	protein_coding	1270.39	-0.64623	0.184351	-0.532114	0.201684	-3.50544	0.000455855	0.0258236	1145.42	2036.64	1609.66	1009.17	1122.56	1003.94	965.332
HVCN1	ENSG00000122986	84329	hydrogen voltage gated channel 1 [Source:HGNC Symbol;Acc:HGNC:28240]	protein_coding	28.2079	5.1318	1.46689	3.78059	2.03992	3.49842	0.00046803	0.0260883	3.41408	1.45474	0	1.21149	101.85	1.02026	88.5045
PPA1	ENSG00000180817	5464	inorganic pyrophosphatase 1 [Source:HGNC Symbol;Acc:HGNC:9226]	protein_coding	3677.09	0.416222	0.11902	0.351127	0.126578	3.49709	0.000470369	0.0261094	3122.18	2865.84	3291.15	4589.13	4128.24	3698.46	4044.66
ZCCHC14	ENSG00000140948	23174	zinc finger CCHC-type containing 14 [Source:HGNC Symbol;Acc:HGNC:24134]	protein_coding	669.016	-0.645602	0.184692	-0.530579	0.201945	-3.49556	0.000473074	0.0261506	708.422	977.586	838.946	484.596	540.247	611.138	522.177
RPA2	ENSG00000117748	6118	replication protein A2 [Source:HGNC Symbol;Acc:HGNC:10290]	protein_coding	2306.77	0.396582	0.113725	0.337105	0.119967	3.48721	0.000488095	0.0268694	1908.47	1959.54	2004.22	2517.48	2682.42	2430.27	2645.02
RPS27L	ENSG00000185088	51065	ribosomal protein S27 like [Source:HGNC Symbol;Acc:HGNC:18476]	protein_coding	967.236	0.695701	0.199596	0.568906	0.222778	3.48555	0.000491131	0.0269253	817.672	574.622	756.802	1488.92	1076.07	892.731	1163.83
GTPBP6	ENSG00000178605	8225	GTP binding protein 6 (putative) [Source:HGNC Symbol;Acc:HGNC:30189]	protein_coding	690.529	0.584395	0.167756	0.481454	0.184454	3.4836	0.000494717	0.0270107	517.233	516.433	583.088	722.048	809.264	881.509	804.127
RPS25	ENSG00000118181	6230	ribosomal protein S25 [Source:HGNC Symbol;Acc:HGNC:10413]	protein_coding	9833.34	0.581903	0.167289	0.476721	0.183914	3.47844	0.000504345	0.027424	8287.68	6875.1	7855.75	15367.8	10627.8	8115.18	11704.1
IQCN	ENSG00000130518	80726	IQ motif containing N [Source:HGNC Symbol;Acc:HGNC:29350]	protein_coding	17.7383	5.20528	1.49699	3.95919	1.86986	3.47717	0.000506727	0.0274416	1.70704	1.45474	0	18.1724	48.7108	1.02026	53.1027
HIGD2A	ENSG00000146066	192286	HIG1 hypoxia inducible domain family member 2A [Source:HGNC Symbol;Acc:HGNC:28311]	protein_coding	1468.07	0.581014	0.167254	0.477852	0.183911	3.47385	0.000513054	0.0276717	1297.35	933.943	1209.72	1799.06	1945.11	1374.3	1716.99
CLMP	ENSG00000166250	79827	CXADR like membrane protein [Source:HGNC Symbol;Acc:HGNC:24039]	protein_coding	10.9313	5.44929	1.57341	0.0266688	0.133016	3.46337	0.000533453	0.0286559	0	1.45474	0	15.7494	4.42826	16.3242	38.5627
COX7A2L	ENSG00000115944	9167	cytochrome c oxidase subunit 7A2 like [Source:HGNC Symbol;Acc:HGNC:2289]	protein_coding	1713.41	0.554502	0.160186	0.457767	0.175495	3.46161	0.000536948	0.0287031	1561.94	1075.05	1427.42	2215.82	2043.64	1687.52	1982.5
PEF1	ENSG00000162517	553115	penta-EF-hand domain containing 1 [Source:HGNC Symbol;Acc:HGNC:30009]	protein_coding	2790.91	0.428981	0.123955	0.360536	0.132637	3.46077	0.00053864	0.0287031	2417.17	2049.73	2538.39	3413.98	3074.32	3021	3021.8
CMTM1	ENSG00000089505	113540	CKLF like MARVEL transmembrane domain containing 1 [Source:HGNC Symbol;Acc:HGNC:19172]	protein_coding	11.7596	5.49733	1.59004	0.0254489	0.132653	3.45734	0.00054553	0.0289544	0	1.45474	0	15.7494	18.8201	2.04053	44.2523
LENG9	ENSG00000275183	94059	leukocyte receptor cluster member 9 [Source:HGNC Symbol;Acc:HGNC:16306]	protein_coding	48.562	2.61669	0.757494	2.05348	0.918316	3.45441	0.000551507	0.02914	25.6056	1.45474	10.773	84.8043	99.6358	23.4661	94.1941
ARHGEF28	ENSG00000214944	64283	Rho guanine nucleotide exchange factor 28 [Source:HGNC Symbol;Acc:HGNC:30322]	protein_coding	50.4671	1.97236	0.571123	1.54695	0.684397	3.45348	0.000553402	0.02914	23.8986	10.1832	23.7903	96.9192	53.1391	66.3172	79.0219
ZNF837	ENSG00000152475	116412	zinc finger protein 837 [Source:HGNC Symbol;Acc:HGNC:25164]	protein_coding	21.577	5.53378	1.60402	4.19943	2.04246	3.44994	0.000560703	0.0292032	1.70704	1.45474	0	1.21149	1.10706	91.8238	53.7349
TMEM230	ENSG00000089063	29058	transmembrane protein 230 [Source:HGNC Symbol;Acc:HGNC:15876]	protein_coding	1285.76	0.532552	0.154328	0.43961	0.168608	3.45077	0.000558986	0.0292032	1087.38	897.575	1095.7	1570.09	1631.81	1249.82	1467.91
FARSA	ENSG00000179115	2193	phenylalanyl-tRNA synthetase subunit alpha [Source:HGNC Symbol;Acc:HGNC:3592]	protein_coding	1070.12	0.523609	0.151783	0.430475	0.165446	3.44972	0.000561179	0.0292032	735.734	928.124	909.869	1184.84	1167.95	1328.38	1235.9
OXA1L	ENSG00000155463	5018	OXA1L mitochondrial inner membrane protein [Source:HGNC Symbol;Acc:HGNC:8526]	protein_coding	2580.41	0.411666	0.119452	0.351123	0.126965	3.44628	0.000568371	0.0294624	2292.55	1923.17	2310.36	2831.25	2870.62	2986.31	2848.58
ZNF287	ENSG00000141040	57336	zinc finger protein 287 [Source:HGNC Symbol;Acc:HGNC:13502]	protein_coding	34.7077	2.78019	0.807295	2.16643	0.989884	3.44384	0.000573516	0.0296139	18.7774	1.45474	4.93762	37.5562	76.3875	33.6687	70.1714
YIF1A	ENSG00000174851	10897	Yip1 interacting factor homolog A, membrane trafficking protein [Source:HGNC Symbol;Acc:HGNC:16688]	protein_coding	1389.97	0.495947	0.144096	0.411427	0.156237	3.44178	0.00057789	0.0297245	1206.88	981.95	1198.49	1526.48	1471.29	1757.92	1586.76
NPIPA8	ENSG00000214940	101059953	nuclear pore complex interacting protein family member A8 [Source:HGNC Symbol;Acc:HGNC:41983]	protein_coding	28.1308	-2.48526	0.72263	-0.0901977	0.180202	-3.43919	0.000583458	0.0298955	52.9182	58.1896	47.5807	10.9034	14.3918	4.08106	8.85045
MKI67	ENSG00000148773	4288	marker of proliferation Ki-67 [Source:HGNC Symbol;Acc:HGNC:7107]	protein_coding	3057.2	-0.402283	0.117268	-0.339094	0.12346	-3.43045	0.000602581	0.030757	3229.72	3881.25	3529.5	2871.23	2694.6	2573.11	2621
TRIM21	ENSG00000132109	6737	tripartite motif containing 21 [Source:HGNC Symbol;Acc:HGNC:11312]	protein_coding	157.414	1.25524	0.366745	0.988692	0.431804	3.42266	0.000620125	0.0314319	121.2	46.5517	98.3035	251.99	180.452	184.668	218.733
SLC22A1	ENSG00000175003	6580	solute carrier family 22 member 1 [Source:HGNC Symbol;Acc:HGNC:10963]	protein_coding	10.8184	-5.22773	1.52747	-0.0309828	0.134486	-3.42248	0.000620521	0.0314319	1.70704	45.097	25.5858	1.21149	1.10706	1.02026	0
RSL24D1	ENSG00000137876	51187	ribosomal L24 domain containing 1 [Source:HGNC Symbol;Acc:HGNC:18479]	protein_coding	2109.97	0.637669	0.186394	0.528708	0.206515	3.42108	0.00062374	0.0314752	1753.13	1408.19	1651.86	3397.02	2216.34	1811.99	2531.23
ZNF821	ENSG00000102984	55565	zinc finger protein 821 [Source:HGNC Symbol;Acc:HGNC:28043]	protein_coding	198.44	-0.945981	0.276705	-0.755221	0.311717	-3.41873	0.000629146	0.0316282	290.197	267.672	262.592	130.841	123.991	173.445	140.343
TPT1	ENSG00000133112	7178	tumor protein, translationally-controlled 1 [Source:HGNC Symbol;Acc:HGNC:12022]	protein_coding	17251.6	0.434097	0.12704	0.362172	0.135845	3.417	0.000633163	0.0317105	13553.9	14759.8	14867.6	20208.9	22449.1	15335.6	19586.7
GPX1	ENSG00000233276	2876	glutathione peroxidase 1 [Source:HGNC Symbol;Acc:HGNC:4553]	protein_coding	3595.14	0.529379	0.155372	0.431155	0.170141	3.40717	0.000656393	0.0325073	3391.89	2244.66	2987.26	4917.44	3824.91	3628.06	4171.72
PRKDC	ENSG00000253729	5591	protein kinase, DNA-activated, catalytic subunit [Source:HGNC Symbol;Acc:HGNC:9413]	protein_coding	4134.31	-0.624902	0.183388	-0.508078	0.202034	-3.40755	0.000655484	0.0325073	3878.4	6300.48	5308.84	2886.98	4586.57	2886.33	3092.6
HDAC6	ENSG00000094631	10013	histone deacetylase 6 [Source:HGNC Symbol;Acc:HGNC:14064]	protein_coding	646.26	-0.763056	0.223823	-0.613651	0.249846	-3.40919	0.000651564	0.0325073	790.36	887.392	851.515	367.082	709.628	446.876	470.971
NPM3	ENSG00000107833	10360	nucleophosmin/nucleoplasmin 3 [Source:HGNC Symbol;Acc:HGNC:7931]	protein_coding	1169.24	0.568736	0.166982	0.463712	0.184284	3.40597	0.000659299	0.0325303	1070.31	712.823	973.16	1423.5	1417.04	1232.48	1355.38
PSMB4	ENSG00000159377	5692	proteasome 20S subunit beta 4 [Source:HGNC Symbol;Acc:HGNC:9541]	protein_coding	3378.72	0.42489	0.124887	0.354975	0.133501	3.4022	0.000668447	0.0326193	3069.26	2446.87	2977.38	3732.6	4154.81	3508.69	3761.44
ACTN4	ENSG00000130402	81	actinin alpha 4 [Source:HGNC Symbol;Acc:HGNC:166]	protein_coding	1653.48	-0.456012	0.133998	-0.379674	0.142929	-3.40312	0.0006662	0.0326193	1800.93	2112.28	1950.36	1318.1	1585.32	1414.09	1393.31
DENND3	ENSG00000105339	22898	DENN domain containing 3 [Source:HGNC Symbol;Acc:HGNC:29134]	protein_coding	135.691	-1.06433	0.312827	-0.844354	0.35465	-3.4023	0.000668224	0.0326193	201.431	197.845	180.448	94.4963	91.8864	90.8035	92.9298
EIPR1	ENSG00000032389	7260	EARP complex and GARP complex interacting protein 1 [Source:HGNC Symbol;Acc:HGNC:12383]	protein_coding	536.93	0.788346	0.23222	0.62943	0.264518	3.39482	0.000686743	0.0333898	474.557	267.672	401.294	576.669	562.389	798.867	677.06
	ENSG00000278817	102724770		protein_coding	489.195	1.0848	0.319661	0.85446	0.373356	3.39359	0.000689823	0.0334176	452.366	148.384	297.155	878.331	532.498	436.673	678.956
RBIS	ENSG00000176731	401466	ribosomal biogenesis factor [Source:HGNC Symbol;Acc:HGNC:32235]	protein_coding	1076.1	0.653002	0.192561	0.526928	0.215661	3.39115	0.000696004	0.0334834	844.985	739.008	854.208	1688.82	1169.06	953.947	1282.68
UBL5	ENSG00000198258	59286	ubiquitin like 5 [Source:HGNC Symbol;Acc:HGNC:13736]	protein_coding	2066.82	0.590938	0.174263	0.480072	0.193022	3.39107	0.00069621	0.0334834	2014.31	1150.7	1655	2464.17	2641.46	2090.52	2451.58
SERF2	ENSG00000140264	10169	small EDRK-rich factor 2 [Source:HGNC Symbol;Acc:HGNC:10757]	protein_coding	4334.51	0.522998	0.154421	0.426519	0.168969	3.38683	0.000707046	0.033761	4231.75	2599.62	3595.93	5633.43	4624.21	4615.68	5040.97
RRBP1	ENSG00000125844	6238	ribosome binding protein 1 [Source:HGNC Symbol;Acc:HGNC:10448]	protein_coding	1244.63	-0.553922	0.163552	-0.451611	0.178077	-3.38683	0.000707049	0.033761	1319.54	1716.59	1523.03	875.908	1224.41	1055.97	996.94
RPSA	ENSG00000168028	3921	ribosomal protein SA [Source:HGNC Symbol;Acc:HGNC:6502]	protein_coding	24929.1	0.416422	0.123022	0.34819	0.13119	3.38494	0.000711935	0.0338728	21025.6	20183.1	21681.5	27790.4	32999.4	22714.1	28109.7
MFSD14A	ENSG00000156875	64645	major facilitator superfamily domain containing 14A [Source:HGNC Symbol;Acc:HGNC:23363]	protein_coding	18.1345	5.24541	1.55295	3.88687	2.01461	3.3777	0.000730941	0.0345562	1.70704	1.45474	0	3.63447	67.5309	2.04053	50.574
LSM7	ENSG00000130332	51690	LSM7 homolog, U6 small nuclear RNA and mRNA degradation associated [Source:HGNC Symbol;Acc:HGNC:20470]	protein_coding	1906.45	0.516591	0.152951	0.4223	0.16781	3.3775	0.000731485	0.0345562	1715.58	1220.53	1665.32	2495.67	2120.03	2014	2113.99
DCAF16	ENSG00000163257	54876	DDB1 and CUL4 associated factor 16 [Source:HGNC Symbol;Acc:HGNC:25987]	protein_coding	819.569	-0.567649	0.168248	-0.461573	0.183641	-3.37389	0.000741148	0.0347962	851.813	1165.25	998.746	709.933	639.883	710.104	661.255
AHNAK	ENSG00000124942	79026	AHNAK nucleoprotein [Source:HGNC Symbol;Acc:HGNC:347]	protein_coding	993.365	-0.641726	0.190217	-0.516537	0.210266	-3.37365	0.000741789	0.0347962	1002.03	1483.84	1256.4	671.166	1008.54	772.34	759.242
PRELID1	ENSG00000169230	27166	PRELI domain containing 1 [Source:HGNC Symbol;Acc:HGNC:30255]	protein_coding	5014.93	0.509894	0.151245	0.412696	0.165379	3.37131	0.000748109	0.0348472	4836.04	3110.24	4187.55	6579.6	5649.35	4955.42	5786.3
FYCO1	ENSG00000163820	79443	FYVE and coiled-coil domain autophagy adaptor 1 [Source:HGNC Symbol;Acc:HGNC:14673]	protein_coding	411.01	-0.750342	0.222543	-0.599059	0.248738	-3.37167	0.000747152	0.0348472	419.932	658.997	522.49	295.604	324.37	350.971	304.708
CLIC1	ENSG00000213719	1192	chloride intracellular channel 1 [Source:HGNC Symbol;Acc:HGNC:2062]	protein_coding	2255.74	0.393407	0.116788	0.329328	0.123998	3.36857	0.000755604	0.034952	1932.37	1779.15	2038.79	2435.1	2532.96	2595.55	2476.23
ZNF592	ENSG00000166716	9640	zinc finger protein 592 [Source:HGNC Symbol;Acc:HGNC:28986]	protein_coding	825.353	-0.539976	0.16027	-0.440447	0.17412	-3.36917	0.00075396	0.034952	988.376	1031.41	991.115	599.688	721.806	769.279	675.795
GNG5	ENSG00000174021	2787	G protein subunit gamma 5 [Source:HGNC Symbol;Acc:HGNC:4408]	protein_coding	422.098	0.76056	0.226018	0.604691	0.258043	3.36505	0.000765307	0.0350358	363.6	218.211	329.474	474.904	547.997	504.011	516.487
MYDGF	ENSG00000074842	56005	myeloid derived growth factor [Source:HGNC Symbol;Acc:HGNC:16948]	protein_coding	1484.48	0.492962	0.14648	0.404118	0.159361	3.36539	0.000764345	0.0350358	1252.97	1105.6	1262.68	1502.25	1583.1	1977.27	1707.51
MUC1	ENSG00000185499	4582	mucin 1, cell surface associated [Source:HGNC Symbol;Acc:HGNC:7508]	protein_coding	18.39	-3.61637	1.07453	-0.044101	0.140063	-3.36554	0.000763928	0.0350358	10.2422	65.4633	37.2566	4.84596	1.10706	9.18238	0.632175
PTGER2	ENSG00000125384	5732	prostaglandin E receptor 2 [Source:HGNC Symbol;Acc:HGNC:9594]	protein_coding	19.8405	5.44305	1.62084	4.04333	2.11032	3.35817	0.000784604	0.0357962	1.70704	1.45474	0	1.21149	1.10706	89.7833	43.6201
GPATCH8	ENSG00000186566	23131	G-patch domain containing 8 [Source:HGNC Symbol;Acc:HGNC:29066]	protein_coding	1098.17	-0.463174	0.137994	-0.382411	0.147691	-3.35649	0.000789397	0.035892	1300.76	1323.81	1279.74	984.942	983.073	880.488	934.355
SCO2	ENSG00000284194	9997	synthesis of cytochrome C oxidase 2 [Source:HGNC Symbol;Acc:HGNC:10604]	protein_coding	476.276	0.657217	0.196074	0.525415	0.221032	3.35188	0.00080265	0.036283	319.217	365.14	392.316	638.455	554.639	509.112	555.05
RPL4	ENSG00000174444	6124	ribosomal protein L4 [Source:HGNC Symbol;Acc:HGNC:10353]	protein_coding	43625.1	0.320225	0.0955438	0.273834	0.0993364	3.35161	0.000803445	0.036283	37993.6	36317.6	40489.4	51214.5	48055.5	44622.3	46683
OSTC	ENSG00000198856	58505	oligosaccharyltransferase complex non-catalytic subunit [Source:HGNC Symbol;Acc:HGNC:24448]	protein_coding	1603.28	0.612299	0.182784	0.490536	0.204387	3.34985	0.000808555	0.0363904	1391.24	1029.96	1280.19	2370.89	1874.26	1377.36	1899.05
TIMM8B	ENSG00000150779	26521	translocase of inner mitochondrial membrane 8 homolog B [Source:HGNC Symbol;Acc:HGNC:11818]	protein_coding	819.456	0.806273	0.240835	0.637337	0.276553	3.34782	0.000814495	0.0365344	739.148	398.599	588.923	1181.2	1144.7	646.848	1036.77
STOML2	ENSG00000165283	30968	stomatin like 2 [Source:HGNC Symbol;Acc:HGNC:14559]	protein_coding	5430.01	0.452518	0.135238	0.373452	0.145894	3.34609	0.000819599	0.0366399	5285	3517.56	4680.86	6348.21	6129.82	5903.25	6145.38
LRTOMT	ENSG00000184154	220074	leucine rich transmembrane and O-methyltransferase domain containing [Source:HGNC Symbol;Acc:HGNC:25033]	protein_coding	37.9651	3.35741	1.00452	2.30437	1.56061	3.3423	0.000830874	0.0368963	20.4845	1.45474	0.448875	107.823	39.8543	12.2432	83.4471
TRIO	ENSG00000038382	7204	trio Rho guanine nucleotide exchange factor [Source:HGNC Symbol;Acc:HGNC:12303]	protein_coding	474.053	-0.764758	0.228792	-0.606296	0.257298	-3.34259	0.000830004	0.0368963	459.194	776.831	619.447	308.93	391.901	416.268	345.8
AURKC	ENSG00000105146	6795	aurora kinase C [Source:HGNC Symbol;Acc:HGNC:11391]	protein_coding	10.1616	5.26761	1.57794	4.07644	2.10532	3.33828	0.000842989	0.0372818	0	0	0.897749	6.05745	33.2119	13.2634	17.7009
PAFAH1B3	ENSG00000079462	5050	platelet activating factor acetylhydrolase 1b catalytic subunit 3 [Source:HGNC Symbol;Acc:HGNC:8576]	protein_coding	846.653	0.581061	0.174097	0.467776	0.193711	3.33757	0.000845152	0.0372818	751.098	529.526	703.835	1018.86	890.08	1053.93	979.239
TTC28	ENSG00000100154	23331	tetratricopeptide repeat domain 28 [Source:HGNC Symbol;Acc:HGNC:29179]	protein_coding	433.46	-0.637463	0.191205	-0.510625	0.21148	-3.33392	0.000856325	0.0376501	559.909	546.982	525.183	330.737	383.044	343.829	344.535
CLVS2	ENSG00000146352	134829	clavesin 2 [Source:HGNC Symbol;Acc:HGNC:23046]	protein_coding	27.2255	2.79764	0.839433	2.12412	1.04511	3.33277	0.000859859	0.0376811	6.82816	4.36422	7.63087	79.9584	17.713	28.5674	45.5166
TMPRSS2	ENSG00000184012	7113	transmembrane serine protease 2 [Source:HGNC Symbol;Acc:HGNC:11876]	protein_coding	7.17775	-5.83546	1.75266	-0.0259389	0.132863	-3.32949	0.000870067	0.0377558	20.4845	17.4569	11.6707	0	0	0	0.632175
PPARA	ENSG00000186951	5465	peroxisome proliferator activated receptor alpha [Source:HGNC Symbol;Acc:HGNC:9232]	protein_coding	391.828	-0.742391	0.222868	-0.588541	0.250064	-3.33107	0.000865121	0.0377558	421.639	600.808	501.393	268.951	356.475	298.938	294.594
ZBTB47	ENSG00000114853	92999	zinc finger and BTB domain containing 47 [Source:HGNC Symbol;Acc:HGNC:26955]	protein_coding	200.168	-1.02756	0.308604	-0.802468	0.354254	-3.32969	0.000869419	0.0377558	230.45	336.045	279.2	128.418	105.171	189.769	132.125
BCDIN3D	ENSG00000186666	144233	BCDIN3 domain containing RNA methyltransferase [Source:HGNC Symbol;Acc:HGNC:27050]	protein_coding	175.374	1.00239	0.301534	0.778731	0.355885	3.32429	0.000886425	0.0381729	112.665	94.5581	130.174	192.627	269.017	200.992	227.583
USE1	ENSG00000053501	55850	unconventional SNARE in the ER 1 [Source:HGNC Symbol;Acc:HGNC:30882]	protein_coding	348.28	0.729903	0.219566	0.576892	0.251263	3.3243	0.000886412	0.0381729	256.056	224.03	281.893	416.753	468.288	377.498	413.443
EEF1B2	ENSG00000114942	1933	eukaryotic translation elongation factor 1 beta 2 [Source:HGNC Symbol;Acc:HGNC:3208]	protein_coding	8327.04	0.463646	0.139496	0.382114	0.151079	3.32371	0.000888274	0.0381729	7411.97	6047.36	7111.07	11040.3	9867.27	7330.6	9480.73
PSMB5	ENSG00000100804	5693	proteasome 20S subunit beta 5 [Source:HGNC Symbol;Acc:HGNC:9542]	protein_coding	2503.2	0.466383	0.140613	0.37315	0.152982	3.31678	0.000910614	0.0390071	2381.32	1648.22	2150.11	2713.74	2795.34	2978.15	2855.54
HLA-F	ENSG00000204642	3134	major histocompatibility complex, class I, F [Source:HGNC Symbol;Acc:HGNC:4963]	protein_coding	168.875	1.07472	0.32425	0.832982	0.38507	3.31448	0.000918129	0.0392029	114.372	81.4655	116.707	247.144	153.882	247.924	220.629
OST4	ENSG00000228474	100128731	oligosaccharyltransferase complex subunit 4, non-catalytic [Source:HGNC Symbol;Acc:HGNC:32483]	protein_coding	1830.52	0.574296	0.173463	0.461596	0.19293	3.31078	0.000930371	0.0395987	1758.25	1056.14	1488.02	2418.13	2113.39	1825.25	2154.45
MAP4	ENSG00000047849	4134	microtubule associated protein 4 [Source:HGNC Symbol;Acc:HGNC:6862]	protein_coding	1779.31	-0.576644	0.174267	-0.462809	0.191893	-3.30897	0.00093641	0.0396027	1684.85	2647.63	2232.25	1242.99	1496.75	1768.12	1382.57
AASS	ENSG00000008311	10157	aminoadipate-semialdehyde synthase [Source:HGNC Symbol;Acc:HGNC:17366]	protein_coding	391.298	-0.715797	0.216272	-0.566566	0.242362	-3.3097	0.000933958	0.0396027	484.799	533.89	491.069	347.698	244.661	336.687	300.283
CTNND1	ENSG00000198561	1500	catenin delta 1 [Source:HGNC Symbol;Acc:HGNC:2515]	protein_coding	112.892	-1.20954	0.365642	-0.938579	0.423354	-3.30798	0.00093972	0.0396169	168.997	176.024	155.311	71.4779	95.2075	53.0538	70.1714
ZFPM2	ENSG00000169946	23414	zinc finger protein, FOG family member 2 [Source:HGNC Symbol;Acc:HGNC:16700]	protein_coding	28.387	2.77851	0.841116	2.07891	1.0711	3.30337	0.000955317	0.0396471	11.9493	0	8.07974	47.2481	49.8179	36.7295	44.8844
MRPL41	ENSG00000182154	64975	mitochondrial ribosomal protein L41 [Source:HGNC Symbol;Acc:HGNC:14492]	protein_coding	1031.13	0.690399	0.208971	0.546281	0.237517	3.3038	0.000953823	0.0396471	1019.1	490.248	787.775	1303.56	1146.92	1205.95	1264.35
HSPBP1	ENSG00000133265	23640	HSPA (Hsp70) binding protein 1 [Source:HGNC Symbol;Acc:HGNC:24989]	protein_coding	765.628	0.570541	0.172675	0.464621	0.192906	3.30414	0.000952689	0.0396471	611.12	510.614	681.84	970.404	826.977	923.339	835.103
PSMA7	ENSG00000101182	5688	proteasome 20S subunit alpha 7 [Source:HGNC Symbol;Acc:HGNC:9536]	protein_coding	3446.06	0.488275	0.147711	0.397059	0.161232	3.3056	0.000947727	0.0396471	3286.05	2212.66	2922.62	4442.54	3850.37	3462.78	3945.41
MTHFD1	ENSG00000100714	4522	methylenetetrahydrofolate dehydrogenase, cyclohydrolase and formyltetrahydrofolate synthetase 1 [Source:HGNC Symbol;Acc:HGNC:7432]	protein_coding	3280.9	-0.345432	0.104464	-0.292756	0.108725	-3.30671	0.000943987	0.0396471	3767.44	3712.5	3719.82	2845.79	3057.71	2963.87	2899.16
MGST2	ENSG00000085871	4258	microsomal glutathione S-transferase 2 [Source:HGNC Symbol;Acc:HGNC:7063]	protein_coding	408.623	0.811717	0.246099	0.634351	0.285368	3.29834	0.000972574	0.040238	367.014	189.116	303.439	528.21	526.963	441.775	503.844
PLAG1	ENSG00000181690	5324	PLAG1 zinc finger [Source:HGNC Symbol;Acc:HGNC:9045]	protein_coding	287.868	1.01943	0.30916	0.786667	0.366578	3.29742	0.000975769	0.0402452	204.845	146.929	195.26	546.382	305.55	233.641	382.466
ATP5MC1	ENSG00000159199	516	ATP synthase membrane subunit c locus 1 [Source:HGNC Symbol;Acc:HGNC:841]	protein_coding	1690.51	0.74766	0.226924	0.58723	0.259979	3.29476	0.000985057	0.0403889	1741.18	707.004	1214.21	2306.68	1620.74	2082.36	2161.41
MPV17	ENSG00000115204	4358	mitochondrial inner membrane protein MPV17 [Source:HGNC Symbol;Acc:HGNC:7224]	protein_coding	616.7	0.718499	0.218078	0.56444	0.249775	3.29469	0.000985317	0.0403889	544.546	331.681	480.296	897.714	708.521	605.017	749.128
IGFBP2	ENSG00000115457	3485	insulin like growth factor binding protein 2 [Source:HGNC Symbol;Acc:HGNC:5471]	protein_coding	1020.93	0.635108	0.193107	0.505655	0.217519	3.28889	0.00100583	0.0411033	914.974	615.355	803.934	1144.86	947.647	1484.48	1235.27
MZT2B	ENSG00000152082	80097	mitotic spindle organizing protein 2B [Source:HGNC Symbol;Acc:HGNC:25886]	protein_coding	2763.06	0.555177	0.168876	0.445805	0.187314	3.28749	0.00101086	0.0411825	2779.06	1534.75	2235.84	3354.62	3217.13	2956.73	3263.29
DAD1	ENSG00000129562	1603	defender against cell death 1 [Source:HGNC Symbol;Acc:HGNC:2664]	protein_coding	3235.4	0.540962	0.1648	0.434828	0.182347	3.28254	0.00102876	0.041784	3129	1944.99	2643.87	4285.04	3820.48	3038.35	3786.1
MAB21L1	ENSG00000180660	4081	mab-21 like 1 [Source:HGNC Symbol;Acc:HGNC:6757]	protein_coding	21.6243	4.48539	1.36773	2.93545	2.23187	3.27943	0.00104016	0.0421185	3.41408	1.45474	0	19.3838	1.10706	38.7701	87.2402
GCAT	ENSG00000100116	23464	glycine C-acetyltransferase [Source:HGNC Symbol;Acc:HGNC:4188]	protein_coding	362.14	0.684629	0.208974	0.537442	0.239007	3.27615	0.00105234	0.0424826	261.177	248.761	298.95	438.56	435.076	429.531	422.925
VPS53	ENSG00000141252	55275	VPS53 subunit of GARP complex [Source:HGNC Symbol;Acc:HGNC:25608]	protein_coding	436.222	-0.656422	0.200496	-0.520156	0.223744	-3.27399	0.0010604	0.0426787	542.839	570.258	539.547	296.815	399.65	361.174	343.271
NPIPA7	ENSG00000214967	101059938	nuclear pore complex interacting protein family member A7 [Source:HGNC Symbol;Acc:HGNC:41982]	protein_coding	432.389	-0.647613	0.198095	-0.512193	0.220904	-3.26921	0.00107848	0.0432758	604.292	498.976	531.019	313.776	366.438	368.315	343.903
CSGALNACT1	ENSG00000147408	55790	chondroitin sulfate N-acetylgalactosaminyltransferase 1 [Source:HGNC Symbol;Acc:HGNC:24290]	protein_coding	10.2141	4.97361	1.5257	3.63828	2.05776	3.25989	0.00111454	0.0435887	0	0	1.34662	15.7494	28.7837	9.18238	16.4366
RLN1	ENSG00000107018	6013	relaxin 1 [Source:HGNC Symbol;Acc:HGNC:10026]	protein_coding	15.584	4.89203	1.49858	3.35184	2.14849	3.26445	0.00109677	0.0435887	1.70704	1.45474	0	19.3838	29.8907	1.02026	55.6314
DHRS4	ENSG00000157326	10901	dehydrogenase/reductase 4 [Source:HGNC Symbol;Acc:HGNC:16985]	protein_coding	354.689	0.701203	0.215175	0.547535	0.247248	3.25876	0.001119	0.0435887	220.208	272.036	294.911	437.348	410.721	423.41	424.19
DEF8	ENSG00000140995	54849	differentially expressed in FDCP 8 homolog [Source:HGNC Symbol;Acc:HGNC:25969]	protein_coding	1051.25	0.569077	0.174545	0.453837	0.195085	3.26035	0.00111274	0.0435887	983.255	622.629	872.163	1298.72	1213.34	1144.74	1223.89
CENPB	ENSG00000125817	1059	centromere protein B [Source:HGNC Symbol;Acc:HGNC:1852]	protein_coding	1708.96	0.540707	0.165586	0.433011	0.183422	3.26542	0.00109304	0.0435887	1217.12	1450.38	1410.81	2369.68	1481.25	2018.08	2015.37
ERAL1	ENSG00000132591	26284	Era like 12S mitochondrial rRNA chaperone 1 [Source:HGNC Symbol;Acc:HGNC:3424]	protein_coding	1740.24	0.49457	0.151679	0.405355	0.166091	3.26063	0.00111164	0.0435887	1654.12	1104.15	1484.43	2018.34	1917.44	2009.92	1993.25
IRS4	ENSG00000133124	8471	insulin receptor substrate 4 [Source:HGNC Symbol;Acc:HGNC:6128]	protein_coding	8387.54	-0.319455	0.0979916	-0.268859	0.101277	-3.26003	0.00111402	0.0435887	9042.19	9867.5	9453.75	7993.41	7723.99	7196.95	7435.01
GTF2I	ENSG00000263001	2969	general transcription factor IIi [Source:HGNC Symbol;Acc:HGNC:4659]	protein_coding	2978.02	-0.359006	0.110086	-0.299872	0.115152	-3.26114	0.00110966	0.0435887	3415.79	3409.91	3387.21	2656.8	2859.55	2504.75	2612.15
MTOR	ENSG00000198793	2475	mechanistic target of rapamycin kinase [Source:HGNC Symbol;Acc:HGNC:3942]	protein_coding	1256.78	-0.549805	0.168693	-0.439672	0.185345	-3.2592	0.00111728	0.0435887	1184.69	1867.89	1543.68	1120.63	1003	1074.34	1003.26
ANKRD10	ENSG00000088448	55608	ankyrin repeat domain 10 [Source:HGNC Symbol;Acc:HGNC:20265]	protein_coding	527.55	-0.609845	0.187036	-0.483214	0.207495	-3.26057	0.0011119	0.0435887	655.503	672.09	640.993	487.019	446.147	366.275	424.822
FSD2	ENSG00000186628	123722	fibronectin type III and SPRY domain containing 2 [Source:HGNC Symbol;Acc:HGNC:18024]	protein_coding	7.87849	-6.72393	2.06417	-0.0172384	0.130728	-3.25745	0.00112416	0.0436621	35.8478	0	19.3016	0	0	0	0
RPL7	ENSG00000147604	6129	ribosomal protein L7 [Source:HGNC Symbol;Acc:HGNC:10363]	protein_coding	21626.5	0.535059	0.164488	0.427067	0.182117	3.25288	0.00114242	0.044114	18548.7	15765	17385.8	33584.9	22833.2	17679.1	25588.6
CLTB	ENSG00000175416	1212	clathrin light chain B [Source:HGNC Symbol;Acc:HGNC:2091]	protein_coding	1463.32	0.503828	0.154853	0.401985	0.170569	3.2536	0.00113954	0.044114	1365.63	939.762	1246.08	1794.22	1589.74	1642.63	1665.15
RAPGEFL1	ENSG00000108352	51195	Rap guanine nucleotide exchange factor like 1 [Source:HGNC Symbol;Acc:HGNC:17428]	protein_coding	77.1945	-1.55681	0.478733	-1.17746	0.569498	-3.25194	0.00114622	0.0441328	87.059	161.476	122.094	60.5745	46.4967	23.4661	39.1949
OXLD1	ENSG00000204237	339229	oxidoreductase like domain containing 1 [Source:HGNC Symbol;Acc:HGNC:27901]	protein_coding	526.077	0.952892	0.293109	0.730227	0.347375	3.25098	0.00115008	0.0441536	518.94	168.75	344.736	782.623	612.207	547.882	707.404
SALL4	ENSG00000101115	57167	spalt like transcription factor 4 [Source:HGNC Symbol;Acc:HGNC:15924]	protein_coding	65.6338	-1.88991	0.582031	-0.120276	0.229107	-3.24709	0.0011659	0.0446325	100.715	120.743	114.912	9.69192	25.4625	63.2564	24.6548
AGO1	ENSG00000092847	26523	argonaute RISC component 1 [Source:HGNC Symbol;Acc:HGNC:3262]	protein_coding	725.318	-0.655754	0.202146	-0.513741	0.226867	-3.24396	0.00117881	0.0449976	781.824	1041.59	921.539	490.654	766.089	522.375	553.153
ELMO3	ENSG00000102890	79767	engulfment and cell motility 3 [Source:HGNC Symbol;Acc:HGNC:17289]	protein_coding	14.9682	4.97888	1.53723	3.52559	2.08968	3.23887	0.00120003	0.0451603	1.70704	1.45474	0	16.9609	43.1755	1.02026	40.4592
ZNF425	ENSG00000204947	155054	zinc finger protein 425 [Source:HGNC Symbol;Acc:HGNC:20690]	protein_coding	54.3564	1.8515	0.571524	1.37893	0.718743	3.23959	0.00119701	0.0451603	8.5352	30.5496	27.3813	62.9975	60.8885	101.006	89.1367
VPS51	ENSG00000149823	738	VPS51 subunit of GARP complex [Source:HGNC Symbol;Acc:HGNC:1172]	protein_coding	1139.21	0.496372	0.153228	0.397737	0.168446	3.23943	0.0011977	0.0451603	969.599	830.657	974.507	1123.05	1458	1315.12	1303.55
EIF3L	ENSG00000100129	51386	eukaryotic translation initiation factor 3 subunit L [Source:HGNC Symbol;Acc:HGNC:18138]	protein_coding	3703.13	0.437996	0.135132	0.356004	0.145917	3.24125	0.00119007	0.0451603	2623.72	3444.83	3185.66	4604.88	3541.5	4271.85	4249.48
PPFIA4	ENSG00000143847	8497	PTPRF interacting protein alpha 4 [Source:HGNC Symbol;Acc:HGNC:9248]	protein_coding	105.669	-1.25219	0.386524	-0.949914	0.455445	-3.23963	0.00119685	0.0451603	117.786	202.209	153.515	69.055	52.032	80.6009	64.4819
CHTF8	ENSG00000168802	54921	chromosome transmission fidelity factor 8 [Source:HGNC Symbol;Acc:HGNC:24353]	protein_coding	24.1607	2.88102	0.890029	2.12875	1.14126	3.237	0.00120795	0.0453306	6.82816	2.90948	6.28424	15.7494	24.3554	69.378	43.6201
MAPKAPK3	ENSG00000114738	7867	MAPK activated protein kinase 3 [Source:HGNC Symbol;Acc:HGNC:6888]	protein_coding	1157.36	0.561481	0.173618	0.444102	0.194074	3.234	0.00122069	0.0456529	1051.54	731.734	954.307	1398.06	1100.42	1506.93	1358.54
MPP3	ENSG00000161647	4356	membrane palmitoylated protein 3 [Source:HGNC Symbol;Acc:HGNC:7221]	protein_coding	289.7	-0.994852	0.307683	-0.758782	0.359261	-3.23337	0.0012234	0.0456529	454.073	356.411	401.294	255.624	108.492	264.249	187.756
RBM5	ENSG00000003756	10181	RNA binding motif protein 5 [Source:HGNC Symbol;Acc:HGNC:9902]	protein_coding	1510.31	-0.456832	0.141393	-0.369614	0.152183	-3.23094	0.00123385	0.0459146	1618.27	1960.99	1776.65	1430.77	1356.15	1158	1271.3
RIMBP3B	ENSG00000274600	440804	RIMS binding protein 3B [Source:HGNC Symbol;Acc:HGNC:33891]	protein_coding	36.068	-2.67863	0.829607	-0.0628967	0.152003	-3.2288	0.00124313	0.0461308	32.4338	101.832	72.2688	31.4988	4.42826	3.06079	6.95393
CUTA	ENSG00000112514	51596	cutA divalent cation tolerance homolog [Source:HGNC Symbol;Acc:HGNC:21101]	protein_coding	1012.9	0.528604	0.164048	0.418445	0.183475	3.22226	0.00127184	0.047065	865.469	651.724	915.255	1210.28	1140.28	1216.16	1091.13
YIF1B	ENSG00000167645	90522	Yip1 interacting factor homolog B, membrane trafficking protein [Source:HGNC Symbol;Acc:HGNC:30511]	protein_coding	1260.5	0.469236	0.145827	0.377589	0.159458	3.21775	0.00129198	0.0476781	1128.35	877.209	1101.99	1446.52	1368.33	1487.55	1413.54
CDK1	ENSG00000170312	983	cyclin dependent kinase 1 [Source:HGNC Symbol;Acc:HGNC:1722]	protein_coding	1371.75	0.599961	0.186577	0.475981	0.210126	3.21561	0.00130166	0.0478345	894.489	1191.43	1099.29	2018.34	1584.21	1165.14	1649.35
ATP5F1B	ENSG00000110955	506	ATP synthase F1 subunit beta [Source:HGNC Symbol;Acc:HGNC:830]	protein_coding	12183.7	0.311663	0.0969333	0.267739	0.100599	3.21523	0.0013034	0.0478345	10727	10177.4	11272.6	12442	13906.9	13652.2	13107.5
CYC1	ENSG00000179091	1537	cytochrome c1 [Source:HGNC Symbol;Acc:HGNC:2579]	protein_coding	3141.39	0.493907	0.153876	0.39496	0.169236	3.20978	0.00132837	0.0484836	3070.97	1956.63	2630.4	3776.22	3095.35	3813.75	3646.39
RPL12	ENSG00000197958	6136	ribosomal protein L12 [Source:HGNC Symbol;Acc:HGNC:10302]	protein_coding	17025.3	0.332079	0.103437	0.269256	0.108368	3.21045	0.00132527	0.0484836	14479.1	14260.8	15837.2	19489.2	20133.1	16808.9	18168.7
CRYBG2	ENSG00000176092	55057	crystallin beta-gamma domain containing 2 [Source:HGNC Symbol;Acc:HGNC:17295]	protein_coding	20.819	4.63725	1.44522	2.9199	2.62202	3.20868	0.00133344	0.0485358	3.41408	1.45474	0	1.21149	4.42826	66.3172	68.9071
NKX2-3	ENSG00000119919	159296	NK2 homeobox 3 [Source:HGNC Symbol;Acc:HGNC:7836]	protein_coding	16.9557	3.40885	1.0638	2.5025	1.35835	3.2044	0.00135345	0.0489963	3.41408	1.45474	3.14212	8.48043	36.5331	34.689	30.9766
DNMT1	ENSG00000130816	1786	DNA methyltransferase 1 [Source:HGNC Symbol;Acc:HGNC:2976]	protein_coding	2613.21	-0.433025	0.135133	-0.350844	0.144878	-3.20444	0.00135327	0.0489963	2572.51	3529.2	3089.6	2145.55	2404.54	2364.97	2186.06
COMMD8	ENSG00000169019	54951	COMM domain containing 8 [Source:HGNC Symbol;Acc:HGNC:26036]	protein_coding	238.848	1.08463	0.338788	0.813716	0.412774	3.20151	0.00136707	0.0490893	124.614	160.021	153.515	422.81	336.548	152.019	322.409
BOLA2B	ENSG00000169627	552900	bolA family member 2B [Source:HGNC Symbol;Acc:HGNC:32479]	protein_coding	1317.72	0.727568	0.227151	0.56067	0.263383	3.20302	0.00135995	0.0490893	1336.61	581.896	964.182	1904.46	1495.64	1277.37	1663.89
FIS1	ENSG00000214253	51024	fission, mitochondrial 1 [Source:HGNC Symbol;Acc:HGNC:21689]	protein_coding	1621.42	0.554693	0.173242	0.437845	0.193899	3.20185	0.00136549	0.0490893	1549.99	965.948	1328.67	2186.74	1640.67	1786.48	1891.47
EXOC1L	ENSG00000250821	644145	exocyst complex component 1 like [Source:HGNC Symbol;Acc:HGNC:53433]	protein_coding	20.3092	4.80128	1.50061	3.11757	2.57585	3.19955	0.00137643	0.0491392	3.41408	1.45474	0	86.0158	2.21413	1.02026	48.0453
SVBP	ENSG00000177868	374969	small vasohibin binding protein [Source:HGNC Symbol;Acc:HGNC:29204]	protein_coding	209.176	0.863569	0.269974	0.654021	0.322149	3.19871	0.00138043	0.0491392	145.098	122.198	162.044	285.912	252.411	241.803	254.767
PPP1R35	ENSG00000160813	221908	protein phosphatase 1 regulatory subunit 35 [Source:HGNC Symbol;Acc:HGNC:28320]	protein_coding	410.448	0.758118	0.236951	0.580202	0.27745	3.19948	0.00137677	0.0491392	365.307	203.664	317.803	530.633	510.357	442.795	502.579
GFUS	ENSG00000104522	7264	GDP-L-fucose synthase [Source:HGNC Symbol;Acc:HGNC:12390]	protein_coding	686.945	0.542008	0.169476	0.426734	0.189289	3.19813	0.00138322	0.0491392	503.577	551.347	583.986	717.202	774.945	883.549	794.012
UQCC3	ENSG00000204922	790955	ubiquinol-cytochrome c reductase complex assembly factor 3 [Source:HGNC Symbol;Acc:HGNC:34399]	protein_coding	683.059	0.90893	0.284407	0.687254	0.339732	3.19588	0.00139404	0.0493922	696.472	222.575	450.67	947.386	658.703	879.468	926.137
ATP5MC3	ENSG00000154518	518	ATP synthase membrane subunit c locus 3 [Source:HGNC Symbol;Acc:HGNC:843]	protein_coding	4714.82	0.454755	0.142388	0.365496	0.155384	3.19377	0.00140429	0.0494918	4532.19	3037.5	4126.05	5899.96	5353.76	4816.67	5237.57
KIAA0319L	ENSG00000142687	79932	KIAA0319 like [Source:HGNC Symbol;Acc:HGNC:30071]	protein_coding	815.502	-0.585114	0.183186	-0.458759	0.203924	-3.1941	0.00140269	0.0494918	930.337	1079.42	1008.62	566.978	624.384	853.961	644.819
TPGS1	ENSG00000141933	91978	tubulin polyglutamylase complex subunit 1 [Source:HGNC Symbol;Acc:HGNC:25058]	protein_coding	146.298	1.12162	0.351606	0.833838	0.433425	3.18999	0.00142278	0.0496392	107.544	58.1896	98.7524	239.875	161.631	165.283	192.813
PDPN	ENSG00000162493	10630	podoplanin [Source:HGNC Symbol;Acc:HGNC:29602]	protein_coding	544.115	0.610219	0.191402	0.474645	0.217821	3.18815	0.00143186	0.0496392	401.154	401.508	456.057	728.106	531.391	653.99	636.6
ATP5F1E	ENSG00000124172	514	ATP synthase F1 subunit epsilon [Source:HGNC Symbol;Acc:HGNC:838]	protein_coding	2311.93	0.591751	0.185694	0.473933	0.208759	3.1867	0.00143908	0.0496392	2043.33	1515.84	1827.82	3251.64	2992.4	1785.46	2767.03
COMMD6	ENSG00000188243	170622	COMM domain containing 6 [Source:HGNC Symbol;Acc:HGNC:24015]	protein_coding	780.83	0.609976	0.191448	0.473848	0.218369	3.18611	0.001442	0.0496392	599.171	552.801	652.664	1068.53	1016.29	685.618	890.735
TXN	ENSG00000136810	7295	thioredoxin [Source:HGNC Symbol;Acc:HGNC:12435]	protein_coding	5496.89	0.520656	0.163298	0.408994	0.181259	3.18838	0.00143075	0.0496392	4962.37	3767.78	4497.72	8049.14	6165.24	4637.1	6398.88
COX6B1	ENSG00000126267	1340	cytochrome c oxidase subunit 6B1 [Source:HGNC Symbol;Acc:HGNC:2280]	protein_coding	3746.35	0.503683	0.15807	0.402147	0.174498	3.18646	0.00144027	0.0496392	3656.48	2317.4	3114.74	5045.86	3772.88	3984.13	4332.93
UBXN1	ENSG00000162191	51035	UBX domain protein 1 [Source:HGNC Symbol;Acc:HGNC:18402]	protein_coding	1637.54	0.496219	0.155523	0.395607	0.171572	3.19064	0.00141958	0.0496392	1539.75	1056.14	1392.86	2024.4	1670.56	1902.79	1876.3
RPL35	ENSG00000136942	11224	ribosomal protein L35 [Source:HGNC Symbol;Acc:HGNC:10344]	protein_coding	18792.5	0.454481	0.142593	0.367609	0.155686	3.18726	0.00143627	0.0496392	17724.2	12512.2	16379	25418.3	20994.4	17626.1	20893.4
MYO15B	ENSG00000266714	80022	myosin XVB [Source:HGNC Symbol;Acc:HGNC:14083]	protein_coding	109.23	-1.37093	0.430214	-1.01759	0.518749	-3.18663	0.00143941	0.0496392	117.786	218.211	166.532	104.188	58.6744	39.7903	59.4245
HECTD4	ENSG00000173064	283450	HECT domain E3 ubiquitin protein ligase 4 [Source:HGNC Symbol;Acc:HGNC:26611]	protein_coding	567.535	-0.639038	0.200637	-0.496006	0.225898	-3.18504	0.00144733	0.0496943	590.636	835.021	711.017	401.003	542.462	451.977	440.626
SMARCC1	ENSG00000173473	6599	SWI/SNF related, matrix associated, actin dependent regulator of chromatin subfamily c member 1 [Source:HGNC Symbol;Acc:HGNC:11104]	protein_coding	2423.63	-0.456524	0.143384	-0.369432	0.154933	-3.18392	0.00145297	0.0497596	2473.5	3225.16	2895.24	1871.75	2468.75	2023.18	2007.79
PPP1CA	ENSG00000172531	5499	protein phosphatase 1 catalytic subunit alpha [Source:HGNC Symbol;Acc:HGNC:9281]	protein_coding	2084.84	0.398758	0.12533	0.325166	0.134256	3.18167	0.00146429	0.0500185	1792.39	1645.31	1863.28	2426.62	2093.46	2471.08	2301.75
HLA-G	ENSG00000204632	3135	major histocompatibility complex, class I, G [Source:HGNC Symbol;Acc:HGNC:4964]	protein_coding	7.47162	6.09993	1.91796	0.0175456	0.130764	3.18042	0.0014706	0.0501058	0	0	0	26.6528	2.21413	5.10132	18.3331
FKBP8	ENSG00000105701	23770	FKBP prolyl isomerase 8 [Source:HGNC Symbol;Acc:HGNC:3724]	protein_coding	4419.38	0.43058	0.135447	0.347891	0.146461	3.17895	0.00147808	0.050232	4212.98	3056.41	3811.39	5022.84	4327.52	5486.98	5017.57
AP4M1	ENSG00000221838	9179	adaptor related protein complex 4 subunit mu 1 [Source:HGNC Symbol;Acc:HGNC:574]	protein_coding	138.92	1.21844	0.383389	0.90139	0.476488	3.17808	0.00148256	0.0502562	81.9379	69.8275	87.0817	113.88	275.659	149.979	194.078
FAM207A	ENSG00000160256	85395	family with sequence similarity 207 member A [Source:HGNC Symbol;Acc:HGNC:15811]	protein_coding	781.773	0.534419	0.168238	0.420236	0.188004	3.17657	0.00149028	0.0502621	534.304	663.362	673.761	980.096	915.542	807.029	898.321
TUBA1A	ENSG00000167552	7846	tubulin alpha 1a [Source:HGNC Symbol;Acc:HGNC:20766]	protein_coding	2226.11	0.366527	0.115376	0.301803	0.122299	3.1768	0.00148911	0.0502621	1804.34	1905.71	2030.71	2426.62	2542.93	2440.47	2431.98
TTC30B	ENSG00000196659	150737	tetratricopeptide repeat domain 30B [Source:HGNC Symbol;Acc:HGNC:26425]	protein_coding	82.0297	1.46798	0.462438	1.07361	0.58793	3.17443	0.00150131	0.0503489	44.383	32.0043	47.5807	69.055	162.738	98.9657	119.481
UNC93B1	ENSG00000110057	81622	unc-93 homolog B1, TLR signaling regulator [Source:HGNC Symbol;Acc:HGNC:13481]	protein_coding	276.254	0.823705	0.259446	0.620899	0.3084	3.17487	0.00149906	0.0503489	172.411	196.39	209.176	301.661	276.766	431.572	345.8
MMACHC	ENSG00000132763	25974	metabolism of cobalamin associated C [Source:HGNC Symbol;Acc:HGNC:24525]	protein_coding	432.031	-0.685425	0.215958	-0.530337	0.245231	-3.17387	0.00150419	0.0503489	554.788	549.892	547.178	260.47	401.864	377.498	332.524
PRRC2B	ENSG00000288701	84726	proline rich coiled-coil 2B [Source:HGNC Symbol;Acc:HGNC:28121]	protein_coding	2901.22	-0.4111	0.129572	-0.33326	0.138242	-3.17276	0.00150999	0.0504164	2929.28	3793.96	3405.16	2330.91	2697.92	2701.66	2449.68
DPF3	ENSG00000205683	8110	double PHD fingers 3 [Source:HGNC Symbol;Acc:HGNC:17427]	protein_coding	66.5393	-1.49629	0.471795	-1.10899	0.569951	-3.17147	0.00151668	0.0505129	100.715	113.47	101.895	38.7677	23.2484	51.0132	36.6662
PEMT	ENSG00000133027	10400	phosphatidylethanolamine N-methyltransferase [Source:HGNC Symbol;Acc:HGNC:8830]	protein_coding	782.873	0.621123	0.195896	0.480859	0.223768	3.17067	0.00152089	0.0505269	711.836	458.243	632.015	1033.4	751.697	961.089	931.826
CNIH1	ENSG00000100528	10175	cornichon family AMPA receptor auxiliary protein 1 [Source:HGNC Symbol;Acc:HGNC:19431]	protein_coding	1931.6	0.556829	0.175704	0.435905	0.197433	3.16913	0.00152895	0.0505426	1761.67	1236.53	1577.35	2868.81	1927.4	1879.33	2270.14
BUB1B	ENSG00000156970	701	BUB1 mitotic checkpoint serine/threonine kinase B [Source:HGNC Symbol;Acc:HGNC:1149]	protein_coding	850.693	-0.490229	0.154671	-0.389414	0.168586	-3.16949	0.00152706	0.0505426	984.962	1061.96	1005.03	694.184	813.692	682.557	712.461
IFI27L2	ENSG00000119632	83982	interferon alpha inducible protein 27 like 2 [Source:HGNC Symbol;Acc:HGNC:19753]	protein_coding	243.551	1.06189	0.335385	0.789003	0.411649	3.16617	0.00154461	0.0506831	129.735	162.931	159.799	445.828	315.513	159.161	331.892
H2AZ1	ENSG00000164032	3015	H2A.Z variant histone 1 [Source:HGNC Symbol;Acc:HGNC:4741]	protein_coding	8243.99	0.455936	0.143996	0.367586	0.157116	3.16632	0.00154382	0.0506831	7562.19	5839.33	7030.72	11249.9	9293.81	7353.05	9378.95
ATXN2L	ENSG00000168488	11273	ataxin 2 like [Source:HGNC Symbol;Acc:HGNC:31326]	protein_coding	1325.24	-0.472223	0.149104	-0.376322	0.161934	-3.16708	0.00153977	0.0506831	1375.87	1767.51	1580.94	1020.07	1200.06	1233.5	1098.72
LSM10	ENSG00000181817	84967	LSM10, U7 small nuclear RNA associated [Source:HGNC Symbol;Acc:HGNC:17562]	protein_coding	452.494	0.773737	0.244702	0.583748	0.28891	3.16196	0.00156713	0.0512266	377.256	253.125	340.696	371.928	650.954	593.794	579.705
CASP3	ENSG00000164305	836	caspase 3 [Source:HGNC Symbol;Acc:HGNC:1504]	protein_coding	329.325	0.740919	0.234393	0.561835	0.27583	3.16101	0.00157221	0.0512266	235.572	216.756	264.387	465.212	408.507	320.363	394.477
KAT2A	ENSG00000108773	2648	lysine acetyltransferase 2A [Source:HGNC Symbol;Acc:HGNC:4201]	protein_coding	952.453	-0.500279	0.15827	-0.39587	0.173169	-3.16092	0.00157271	0.0512266	998.618	1287.45	1141.94	778.988	779.373	893.752	787.058
DBN1	ENSG00000113758	1627	drebrin 1 [Source:HGNC Symbol;Acc:HGNC:2695]	protein_coding	1186.72	-0.542951	0.171843	-0.425443	0.190291	-3.15958	0.00157995	0.0513367	1186.39	1680.23	1464.68	827.448	1082.71	1119.23	946.366
PHPT1	ENSG00000054148	29085	phosphohistidine phosphatase 1 [Source:HGNC Symbol;Acc:HGNC:30033]	protein_coding	888.293	0.663484	0.210166	0.509124	0.242769	3.15695	0.0015943	0.0516071	827.914	482.974	693.062	1320.52	883.437	933.542	1076.59
COMMD4	ENSG00000140365	54939	COMM domain containing 4 [Source:HGNC Symbol;Acc:HGNC:26027]	protein_coding	1584.43	0.545775	0.172898	0.426114	0.194074	3.15663	0.00159602	0.0516071	1447.57	1021.23	1302.19	2189.16	1854.33	1437.55	1839
CARHSP1	ENSG00000153048	23589	calcium regulated heat stable protein 1 [Source:HGNC Symbol;Acc:HGNC:17150]	protein_coding	775.227	0.581933	0.184402	0.452149	0.209161	3.15579	0.00160062	0.0516305	708.422	464.062	644.584	986.153	843.583	876.407	903.378
ALDH1A1	ENSG00000165092	216	aldehyde dehydrogenase 1 family member A1 [Source:HGNC Symbol;Acc:HGNC:402]	protein_coding	10.8688	-4.59998	1.45991	-0.0287712	0.133657	-3.15086	0.00162792	0.0523844	1.70704	46.5517	22.4437	1.21149	1.10706	3.06079	0
ANAPC11	ENSG00000141552	51529	anaphase promoting complex subunit 11 [Source:HGNC Symbol;Acc:HGNC:14452]	protein_coding	2208.08	0.606793	0.192731	0.468456	0.219757	3.14839	0.00164175	0.0527022	2205.5	1179.79	1724.58	3100.2	2537.39	2047.67	2661.46
TP53BP1	ENSG00000067369	7158	tumor protein p53 binding protein 1 [Source:HGNC Symbol;Acc:HGNC:11999]	protein_coding	631.493	-0.620431	0.197189	-0.478811	0.222215	-3.14637	0.00165309	0.0529386	698.179	881.573	783.286	545.171	612.207	405.045	494.993
MRPL12	ENSG00000262814	6182	mitochondrial ribosomal protein L12 [Source:HGNC Symbol;Acc:HGNC:10378]	protein_coding	1208.99	0.515869	0.16402	0.404351	0.182824	3.14516	0.00165995	0.0529796	1135.18	757.92	1026.13	1482.86	1370.55	1303.9	1386.36
BSN	ENSG00000164061	8927	bassoon presynaptic cytomatrix protein [Source:HGNC Symbol;Acc:HGNC:1117]	protein_coding	109.548	-1.17242	0.372818	-0.86765	0.44758	-3.14474	0.00166232	0.0529796	160.462	167.295	153.515	53.3056	97.4217	65.2969	69.5393
RPS18	ENSG00000231500	6222	ribosomal protein S18 [Source:HGNC Symbol;Acc:HGNC:10401]	protein_coding	22999.3	0.375106	0.119474	0.306626	0.12715	3.13964	0.00169157	0.0537831	20909.5	17714.4	20453.9	29004.3	26059.2	21452.1	25401.4
SNX4	ENSG00000114520	8723	sorting nexin 4 [Source:HGNC Symbol;Acc:HGNC:11175]	protein_coding	637.732	0.715558	0.22825	0.541642	0.267736	3.13498	0.00171868	0.0542564	484.799	429.148	489.273	1078.23	625.491	576.449	780.736
ITGB1BP1	ENSG00000119185	9270	integrin subunit beta 1 binding protein 1 [Source:HGNC Symbol;Acc:HGNC:23927]	protein_coding	1063.61	0.588717	0.187789	0.454273	0.213755	3.13499	0.00171862	0.0542564	996.911	625.538	860.941	1378.68	1326.26	1003.94	1252.97
XPR1	ENSG00000143324	9213	xenotropic and polytropic retrovirus receptor 1 [Source:HGNC Symbol;Acc:HGNC:12827]	protein_coding	648.472	-0.539968	0.172213	-0.42214	0.190619	-3.13547	0.00171579	0.0542564	774.996	813.2	777.451	596.053	469.395	573.389	534.82
SERHL2	ENSG00000183569	253190	serine hydrolase like 2 [Source:HGNC Symbol;Acc:HGNC:29446]	protein_coding	30.3592	3.28965	1.05042	1.90199	2.59336	3.13174	0.00173772	0.0547279	17.0704	1.45474	0.448875	38.7677	7.74945	85.7022	61.321
C19orf53	ENSG00000104979	28974	chromosome 19 open reading frame 53 [Source:HGNC Symbol;Acc:HGNC:24991]	protein_coding	2224.5	0.478285	0.152856	0.377807	0.16863	3.12898	0.00175413	0.0548555	2065.52	1492.56	1901.88	2976.63	2410.08	2198.67	2526.17
ATP5F1A	ENSG00000152234	498	ATP synthase F1 subunit alpha [Source:HGNC Symbol;Acc:HGNC:823]	protein_coding	5851.84	0.306667	0.0979822	0.251413	0.10167	3.12982	0.00174915	0.0548555	5005.04	5059.59	5421.06	6212.52	6603.64	6366.45	6294.57
ERCC5	ENSG00000134899	2073	ERCC excision repair 5, endonuclease [Source:HGNC Symbol;Acc:HGNC:3437]	protein_coding	26.4793	-2.32393	0.742575	-0.076367	0.163675	-3.12956	0.00175066	0.0548555	73.4027	27.6401	45.3363	8.48043	7.74945	13.2634	9.48263
RPL21	ENSG00000122026	6144	ribosomal protein L21 [Source:HGNC Symbol;Acc:HGNC:10313]	protein_coding	8726.85	0.437695	0.139979	0.34952	0.152283	3.12687	0.00176679	0.0551223	7512.68	6790.73	7500.69	11848.4	10062.1	7496.9	9876.47
SMIM13	ENSG00000224531	221710	small integral membrane protein 13 [Source:HGNC Symbol;Acc:HGNC:27356]	protein_coding	505.631	0.76642	0.245293	0.571743	0.29215	3.12451	0.00178103	0.0554367	447.245	254.58	386.481	777.777	575.674	464.22	633.44
LY6K	ENSG00000160886	54742	lymphocyte antigen 6 family member K [Source:HGNC Symbol;Acc:HGNC:24225]	protein_coding	16.4695	5.17856	1.65804	0.0219793	0.131748	3.1233	0.00178837	0.0555354	1.70704	1.45474	0	1.21149	76.3875	1.02026	33.5053
SCAND1	ENSG00000171222	51282	SCAN domain containing 1 [Source:HGNC Symbol;Acc:HGNC:10566]	protein_coding	422.7	0.701687	0.224718	0.530944	0.263502	3.12253	0.00179305	0.0555513	375.549	226.94	335.758	470.058	498.179	539.72	512.694
IQGAP1	ENSG00000140575	8826	IQ motif containing GTPase activating protein 1 [Source:HGNC Symbol;Acc:HGNC:6110]	protein_coding	1494.39	-0.486502	0.155858	-0.377058	0.170531	-3.12145	0.00179961	0.0556252	1461.23	2096.28	1794.15	1389.58	1331.8	1160.04	1227.68
UROD	ENSG00000126088	7389	uroporphyrinogen decarboxylase [Source:HGNC Symbol;Acc:HGNC:12591]	protein_coding	1155.26	0.436041	0.139763	0.346734	0.152214	3.11987	0.00180933	0.0557961	899.61	961.583	1027.47	1308.41	1386.04	1222.28	1281.42
KIF27	ENSG00000165115	55582	kinesin family member 27 [Source:HGNC Symbol;Acc:HGNC:18632]	protein_coding	82.0125	7.43502	2.38396	0.00900791	0.129493	3.11876	0.00181611	0.0558759	1.70704	1.45474	0	365.87	1.10706	1.02026	202.928
XRCC4	ENSG00000152422	7518	X-ray repair cross complementing 4 [Source:HGNC Symbol;Acc:HGNC:12831]	protein_coding	136.997	1.10333	0.35421	0.80043	0.445828	3.11489	0.00184011	0.0563538	63.1605	93.1034	92.4682	231.395	167.167	134.675	177.009
PLXNA1	ENSG00000114554	5361	plexin A1 [Source:HGNC Symbol;Acc:HGNC:9099]	protein_coding	761.454	-0.683047	0.219277	-0.518484	0.251962	-3.11499	0.00183948	0.0563538	773.289	1139.06	993.808	421.599	726.234	714.185	562.004
COMMD3	ENSG00000148444	23412	COMM domain containing 3 [Source:HGNC Symbol;Acc:HGNC:23332]	protein_coding	175.988	1.2632	0.405655	0.908778	0.519951	3.11396	0.00184593	0.0564025	129.735	62.5538	103.241	307.719	270.124	99.9859	258.56
NDUFAF3	ENSG00000178057	25915	NADH:ubiquinone oxidoreductase complex assembly factor 3 [Source:HGNC Symbol;Acc:HGNC:29918]	protein_coding	2056.36	0.493259	0.15851	0.386625	0.176054	3.11186	0.00185916	0.0566766	1952.85	1306.36	1754.2	2707.68	2092.35	2252.74	2328.3
ADAMTS9	ENSG00000163638	56999	ADAM metallopeptidase with thrombospondin type 1 motif 9 [Source:HGNC Symbol;Acc:HGNC:13202]	protein_coding	80.8713	-1.35579	0.436122	-0.982796	0.536046	-3.10873	0.00187893	0.0571487	93.8872	158.567	118.952	50.8826	35.4261	62.2361	46.1488
PPP1R16B	ENSG00000101445	26051	protein phosphatase 1 regulatory subunit 16B [Source:HGNC Symbol;Acc:HGNC:15850]	protein_coding	221.776	-1.04436	0.33605	-0.767019	0.406004	-3.10775	0.00188515	0.0572072	199.724	421.875	318.252	100.554	179.344	194.871	137.814
HNRNPU	ENSG00000153187	3192	heterogeneous nuclear ribonucleoprotein U [Source:HGNC Symbol;Acc:HGNC:5048]	protein_coding	7839.5	-0.340722	0.109675	-0.279916	0.114587	-3.10665	0.0018922	0.0572907	7918.96	9823.86	8965.37	7528.2	6899.23	6905.15	6835.71
NPIPB5	ENSG00000243716	100132247	nuclear pore complex interacting protein family member B5 [Source:HGNC Symbol;Acc:HGNC:37233]	protein_coding	1291.46	-0.513095	0.165232	-0.399859	0.182392	-3.1053	0.00190089	0.0574233	1353.68	1747.14	1565.67	1009.17	1348.4	969.251	1046.88
COX7B	ENSG00000131174	1349	cytochrome c oxidase subunit 7B [Source:HGNC Symbol;Acc:HGNC:2291]	protein_coding	2675.09	0.559441	0.180242	0.426033	0.205903	3.10383	0.00191033	0.0575779	2195.25	1825.7	2309.01	4074.24	3199.42	2174.18	2947.83
ZNRD2	ENSG00000173465	10534	zinc ribbon domain containing 2 [Source:HGNC Symbol;Acc:HGNC:11328]	protein_coding	508.816	0.706223	0.227913	0.529159	0.268943	3.09865	0.00194405	0.0584619	459.194	270.582	395.458	735.375	529.177	558.085	613.842
NUDT16L1	ENSG00000168101	84309	nudix hydrolase 16 like 1 [Source:HGNC Symbol;Acc:HGNC:28154]	protein_coding	257.747	0.906225	0.292629	0.662871	0.359833	3.09683	0.00195599	0.0586886	216.794	114.924	187.181	394.946	252.411	306.079	331.892
POLR2I	ENSG00000105258	5438	RNA polymerase II subunit I [Source:HGNC Symbol;Acc:HGNC:9196]	protein_coding	960.526	0.601155	0.194338	0.458821	0.223112	3.09335	0.00197907	0.0591148	906.438	549.892	774.309	1327.79	957.611	1067.2	1140.44
RPL3	ENSG00000100316	6122	ribosomal protein L3 [Source:HGNC Symbol;Acc:HGNC:10332]	protein_coding	47197.7	0.308185	0.0996247	0.256809	0.103579	3.09346	0.0019784	0.0591148	44191.9	36924.2	43715	53503.1	49842.3	51598.9	50608.8
GLIS1	ENSG00000174332	148979	GLIS family zinc finger 1 [Source:HGNC Symbol;Acc:HGNC:29525]	protein_coding	9.90418	-4.71747	1.52547	-0.0271268	0.133133	-3.09247	0.00198495	0.0591578	42.676	1.45474	20.6482	2.42298	1.10706	1.02026	0
ZNF506	ENSG00000081665	440515	zinc finger protein 506 [Source:HGNC Symbol;Acc:HGNC:23780]	protein_coding	14.1154	4.66044	1.50794	0.0262447	0.132838	3.0906	0.00199753	0.0593998	1.70704	1.45474	0	21.8068	1.10706	18.3648	54.3671
VDAC2	ENSG00000165637	7417	voltage dependent anion channel 2 [Source:HGNC Symbol;Acc:HGNC:12672]	protein_coding	3474.72	0.359682	0.116491	0.303028	0.123445	3.08762	0.00201765	0.0598645	3154.61	2676.72	3156.93	3788.33	4128.24	3627.04	3791.15
ANO6	ENSG00000177119	196527	anoctamin 6 [Source:HGNC Symbol;Acc:HGNC:25240]	protein_coding	510.189	-0.608212	0.197169	-0.46314	0.223261	-3.08472	0.00203741	0.0603164	559.909	714.278	627.975	487.019	367.545	408.106	406.489
CLN3	ENSG00000188603	1201	CLN3 lysosomal/endosomal transmembrane protein, battenin [Source:HGNC Symbol;Acc:HGNC:2074]	protein_coding	8.78652	-4.9159	1.59469	-0.0264533	0.132935	-3.08267	0.00205153	0.0605998	1.70704	34.9138	21.546	1.21149	1.10706	1.02026	0
MAPK8IP3	ENSG00000138834	23162	mitogen-activated protein kinase 8 interacting protein 3 [Source:HGNC Symbol;Acc:HGNC:6884]	protein_coding	380.797	-0.682364	0.221406	-0.50799	0.255467	-3.08196	0.00205643	0.06061	411.397	560.075	482.54	256.836	328.798	332.606	293.329
CPNE3	ENSG00000085719	8895	copine 3 [Source:HGNC Symbol;Acc:HGNC:2316]	protein_coding	894.23	-0.577723	0.187716	-0.444236	0.211537	-3.07764	0.00208648	0.0613599	814.258	1367.46	1118.6	717.202	764.982	775.401	701.714
DCP1B	ENSG00000151065	196513	decapping mRNA 1B [Source:HGNC Symbol;Acc:HGNC:24451]	protein_coding	315.561	0.989022	0.321465	0.715745	0.401661	3.07661	0.00209372	0.0614374	276.54	128.017	204.238	242.298	550.211	376.478	431.144
NRBP1	ENSG00000115216	29959	nuclear receptor binding protein 1 [Source:HGNC Symbol;Acc:HGNC:7993]	protein_coding	1249.94	0.446806	0.1454	0.352038	0.159188	3.07293	0.00211965	0.0620616	988.376	1038.68	1084.93	1209.07	1554.32	1451.84	1422.39
PPT2-EGFL8	ENSG00000258388		PPT2-EGFL8 readthrough (NMD candidate) [Source:HGNC Symbol;Acc:HGNC:48343]	protein_coding	7.66188	-5.26834	1.71482	-0.0254402	0.132651	-3.07225	0.00212452	0.0620678	5.12112	26.1853	20.1994	0	1.10706	1.02026	0
SLC44A3	ENSG00000143036	126969	solute carrier family 44 member 3 [Source:HGNC Symbol;Acc:HGNC:28689]	protein_coding	64.8652	1.53576	0.500475	1.06848	0.676634	3.06861	0.00215058	0.0625579	37.5549	20.3664	36.3588	88.4388	118.456	61.2159	91.6654
GCN1	ENSG00000089154	10985	GCN1 activator of EIF2AK4 [Source:HGNC Symbol;Acc:HGNC:4199]	protein_coding	2018.91	-0.430335	0.140239	-0.340478	0.151354	-3.06859	0.00215069	0.0625579	2282.31	2427.96	2386.67	1448.94	1937.36	1951.77	1697.39
CHCHD2	ENSG00000106153	51142	coiled-coil-helix-coiled-coil-helix domain containing 2 [Source:HGNC Symbol;Acc:HGNC:21645]	protein_coding	5520.32	0.411691	0.134222	0.328726	0.145196	3.06724	0.00216042	0.062704	5423.27	3708.13	4824.5	6688.64	5937.19	5874.68	6185.83
PIGP	ENSG00000185808	51227	phosphatidylinositol glycan anchor biosynthesis class P [Source:HGNC Symbol;Acc:HGNC:3046]	protein_coding	411.833	0.766954	0.250296	0.561433	0.302425	3.06418	0.00218266	0.0631482	363.6	209.483	311.968	610.591	493.751	387.701	505.74
ZNF639	ENSG00000121864	51193	zinc finger protein 639 [Source:HGNC Symbol;Acc:HGNC:30950]	protein_coding	379.65	0.713065	0.232785	0.527594	0.277477	3.06319	0.00218995	0.0631482	297.025	237.123	302.99	574.246	394.115	396.883	455.166
PDLIM1	ENSG00000107438	9124	PDZ and LIM domain 1 [Source:HGNC Symbol;Acc:HGNC:2067]	protein_coding	1352.81	0.431387	0.1408	0.340969	0.153596	3.06382	0.0021853	0.0631482	1218.83	976.131	1196.7	1447.73	1537.71	1585.49	1507.11
SLC2A3	ENSG00000059804	6515	solute carrier family 2 member 3 [Source:HGNC Symbol;Acc:HGNC:11007]	protein_coding	371.42	0.755296	0.246959	0.555915	0.296593	3.05839	0.00222529	0.0640288	204.845	315.679	280.995	499.134	335.441	502.99	460.856
STARD13	ENSG00000133121	90627	StAR related lipid transfer domain containing 13 [Source:HGNC Symbol;Acc:HGNC:19164]	protein_coding	152.019	-0.950583	0.311271	-0.689808	0.375883	-3.05388	0.00225904	0.0648597	172.411	256.034	200.198	106.611	107.385	115.29	106.205
SSNA1	ENSG00000176101	8636	SS nuclear autoantigen 1 [Source:HGNC Symbol;Acc:HGNC:11321]	protein_coding	801.889	0.596807	0.195558	0.449669	0.225846	3.05181	0.00227463	0.0651669	752.805	466.972	646.379	975.25	783.802	1036.59	951.424
KAT6A	ENSG00000083168	7994	lysine acetyltransferase 6A [Source:HGNC Symbol;Acc:HGNC:13013]	protein_coding	1133.57	-0.465486	0.152615	-0.362923	0.166735	-3.05006	0.00228792	0.065407	1193.22	1495.47	1342.58	884.388	1091.57	984.555	943.205
SDHB	ENSG00000117118	6390	succinate dehydrogenase complex iron sulfur subunit B [Source:HGNC Symbol;Acc:HGNC:10681]	protein_coding	1819.32	0.490261	0.160861	0.379212	0.179365	3.04773	0.00230573	0.0655692	1640.47	1261.26	1539.64	2389.06	2196.42	1622.22	2086.18
C1orf43	ENSG00000143612	25912	chromosome 1 open reading frame 43 [Source:HGNC Symbol;Acc:HGNC:29876]	protein_coding	5230.18	0.367847	0.120709	0.296404	0.128592	3.04739	0.00230836	0.0655692	4936.76	3839.06	4703.76	6118.03	5980.36	5298.23	5735.09
NUP214	ENSG00000126883	8021	nucleoporin 214 [Source:HGNC Symbol;Acc:HGNC:8064]	protein_coding	701.777	-0.578036	0.189647	-0.438061	0.214373	-3.04796	0.00230397	0.0655692	761.34	961.583	868.123	476.116	707.414	581.551	556.314
RPL5	ENSG00000122406	6125	ribosomal protein L5 [Source:HGNC Symbol;Acc:HGNC:10360]	protein_coding	24078.9	0.324687	0.106664	0.266386	0.111709	3.04401	0.00233447	0.0661698	21389.2	19817.9	22022.7	29864.5	23783.1	25569.9	26105
KRT75	ENSG00000170454	9119	keratin 75 [Source:HGNC Symbol;Acc:HGNC:24431]	protein_coding	18.1604	-2.94467	0.967983	-0.0501683	0.143291	-3.04207	0.0023496	0.0664573	10.2422	64.0086	33.6656	6.05745	2.21413	7.14185	3.79305
PJVK	ENSG00000204311	494513	pejvakin [Source:HGNC Symbol;Acc:HGNC:29502]	protein_coding	26.2475	2.64392	0.869525	1.76655	1.30952	3.04064	0.00236072	0.0666304	8.5352	5.81896	5.38649	10.9034	58.6744	25.5066	68.9071
OBSCN	ENSG00000154358	84033	obscurin, cytoskeletal calmodulin and titin-interacting RhoGEF [Source:HGNC Symbol;Acc:HGNC:15719]	protein_coding	385.257	-0.687346	0.226148	-0.509543	0.262741	-3.03936	0.00237081	0.0667736	396.033	590.625	485.682	330.737	333.226	265.269	295.226
AGA	ENSG00000038002	175	aspartylglucosaminidase [Source:HGNC Symbol;Acc:HGNC:318]	protein_coding	136.072	1.03619	0.341263	0.729854	0.440421	3.03634	0.00239473	0.0668817	95.5942	64.0086	96.9569	205.953	170.488	146.918	172.584
SIL1	ENSG00000120725	64374	SIL1 nucleotide exchange factor [Source:HGNC Symbol;Acc:HGNC:24624]	protein_coding	578.131	0.7308	0.240647	0.539646	0.287546	3.03681	0.00239093	0.0668817	322.631	514.978	425.533	453.097	793.765	789.685	747.231
CMSS1	ENSG00000184220	84319	cms1 ribosomal small subunit homolog [Source:HGNC Symbol;Acc:HGNC:28666]	protein_coding	1668.25	0.508292	0.167303	0.389942	0.187965	3.03816	0.0023803	0.0668817	1486.83	1155.06	1396.45	2402.39	1738.09	1583.45	1915.49
HMGB1	ENSG00000189403	3146	high mobility group box 1 [Source:HGNC Symbol;Acc:HGNC:4983]	protein_coding	9322.52	0.318451	0.104866	0.247953	0.109793	3.03675	0.00239145	0.0668817	7910.42	7781.41	8864.37	10639.3	10837.1	9468.05	9756.99
HSPG2	ENSG00000142798	3339	heparan sulfate proteoglycan 2 [Source:HGNC Symbol;Acc:HGNC:5273]	protein_coding	126.17	-1.28508	0.423364	-0.905988	0.536272	-3.03539	0.00240224	0.0669513	172.411	205.118	191.221	52.0941	142.811	49.993	69.5393
SPATA6	ENSG00000132122	54558	spermatogenesis associated 6 [Source:HGNC Symbol;Acc:HGNC:18309]	protein_coding	57.7405	1.53497	0.506004	1.04744	0.699908	3.03351	0.0024173	0.0672301	20.4845	29.0948	34.5633	61.786	77.4945	97.9454	82.815
ATP5MK	ENSG00000173915	84833	ATP synthase membrane subunit k [Source:HGNC Symbol;Acc:HGNC:30889]	protein_coding	1101.51	0.599871	0.197795	0.450639	0.229138	3.03279	0.00242303	0.0672491	1031.05	650.269	875.754	1585.84	1275.34	990.677	1301.65
DMPK	ENSG00000104936	1760	DM1 protein kinase [Source:HGNC Symbol;Acc:HGNC:2933]	protein_coding	236.662	-0.84206	0.277735	-0.613673	0.332325	-3.03189	0.00243032	0.0673112	237.279	402.963	307.03	205.953	163.846	171.404	168.159
TSPAN19	ENSG00000231738	144448	tetraspanin 19 [Source:HGNC Symbol;Acc:HGNC:31886]	protein_coding	14.7031	4.96348	1.63893	0.022103	0.131758	3.02848	0.00245785	0.0679244	1.70704	1.45474	0	2.42298	1.10706	60.1956	36.034
UBR2	ENSG00000024048	23304	ubiquitin protein ligase E3 component n-recognin 2 [Source:HGNC Symbol;Acc:HGNC:21289]	protein_coding	432.076	-0.776791	0.256545	-0.566991	0.304995	-3.02789	0.00246266	0.0679244	462.608	660.452	573.662	450.674	222.52	344.849	309.766
FASN	ENSG00000169710	2194	fatty acid synthase [Source:HGNC Symbol;Acc:HGNC:3594]	protein_coding	2051.59	-0.431499	0.142611	-0.339577	0.154382	-3.0257	0.00248058	0.0681366	2169.65	2609.8	2434.25	1498.61	1948.43	1983.39	1716.99
DCTN1	ENSG00000204843	1639	dynactin subunit 1 [Source:HGNC Symbol;Acc:HGNC:2711]	protein_coding	2069.48	-0.456099	0.150712	-0.354522	0.164634	-3.0263	0.00247567	0.0681366	1952.85	2902.21	2480.03	1673.07	1944.01	1832.4	1701.82
RAB11A	ENSG00000103769	8766	RAB11A, member RAS oncogene family [Source:HGNC Symbol;Acc:HGNC:9760]	protein_coding	2446.91	0.412347	0.136359	0.325234	0.148061	3.02397	0.00249479	0.0682457	2234.52	1783.51	2166.27	3141.39	2544.03	2546.58	2712.03
SNRPB	ENSG00000125835	6628	small nuclear ribonucleoprotein polypeptides B and B1 [Source:HGNC Symbol;Acc:HGNC:11153]	protein_coding	4407.67	0.353262	0.116802	0.291485	0.123734	3.02447	0.00249072	0.0682457	4163.47	3305.17	3964.01	4595.18	4904.3	5072.76	4848.78
COX8A	ENSG00000176340	1351	cytochrome c oxidase subunit 8A [Source:HGNC Symbol;Acc:HGNC:2294]	protein_coding	2792.62	0.542259	0.17945	0.409658	0.204198	3.02178	0.00251294	0.0686013	2903.68	1515.84	2237.19	3535.13	3188.35	2848.58	3319.55
STAMBPL1	ENSG00000138134	57559	STAM binding protein like 1 [Source:HGNC Symbol;Acc:HGNC:24105]	protein_coding	65.0474	1.43374	0.474815	0.971764	0.660231	3.01957	0.0025313	0.0689065	35.8478	23.2758	41.2965	100.554	74.1733	89.7833	90.4011
ANXA4	ENSG00000196975	307	annexin A4 [Source:HGNC Symbol;Acc:HGNC:542]	protein_coding	259.047	0.944923	0.313053	0.669396	0.397322	3.01842	0.00254099	0.0689065	206.552	126.562	178.203	222.914	464.967	268.33	345.8
B3GNT3	ENSG00000179913	10331	UDP-GlcNAc:betaGal beta-1,3-N-acetylglucosaminyltransferase 3 [Source:HGNC Symbol;Acc:HGNC:13528]	protein_coding	7.02681	6.01159	1.99315	0.0155843	0.130393	3.01612	0.00256033	0.0689065	0	0	0	27.8643	2.21413	2.04053	17.0687
ACIN1	ENSG00000100813	22985	apoptotic chromatin condensation inducer 1 [Source:HGNC Symbol;Acc:HGNC:17066]	protein_coding	2991.74	-0.386942	0.128233	-0.307399	0.136628	-3.01749	0.0025488	0.0689065	3200.7	3673.22	3483.72	2303.04	3005.68	2728.19	2547.67
ZNF618	ENSG00000157657	114991	zinc finger protein 618 [Source:HGNC Symbol;Acc:HGNC:29416]	protein_coding	490.161	-0.674339	0.223543	-0.496106	0.260475	-3.0166	0.00255627	0.0689065	621.363	624.084	620.793	272.585	449.468	472.382	370.455
RBM20	ENSG00000203867	282996	RNA binding motif protein 20 [Source:HGNC Symbol;Acc:HGNC:27424]	protein_coding	288.048	-0.721618	0.239217	-0.520112	0.282134	-3.01659	0.00255637	0.0689065	334.58	416.056	362.691	208.376	267.91	206.093	220.629
NBEAL2	ENSG00000160796	23218	neurobeachin like 2 [Source:HGNC Symbol;Acc:HGNC:31928]	protein_coding	474.696	-0.753179	0.249611	-0.547949	0.296501	-3.01741	0.00254944	0.0689065	457.487	765.194	627.527	267.739	474.931	391.782	338.214
MARCHF2	ENSG00000099785	51257	membrane associated ring-CH-type finger 2 [Source:HGNC Symbol;Acc:HGNC:28038]	protein_coding	86.2684	1.8604	0.617146	1.24699	0.904873	3.01452	0.00257384	0.0689866	69.9886	5.81896	28.728	56.9401	150.561	135.695	156.147
NDUFA2	ENSG00000131495	4695	NADH:ubiquinone oxidoreductase subunit A2 [Source:HGNC Symbol;Acc:HGNC:7685]	protein_coding	1089.93	0.586071	0.194486	0.43463	0.225269	3.01343	0.00258312	0.0689866	1043	629.903	874.408	1499.83	1273.12	1020.26	1289.01
EGLN2	ENSG00000269858	112398	egl-9 family hypoxia inducible factor 2 [Source:HGNC Symbol;Acc:HGNC:14660]	protein_coding	40.6347	-2.02164	0.670902	-0.082811	0.169867	-3.01332	0.00258402	0.0689866	42.676	97.4676	73.1665	6.05745	19.9272	30.6079	14.54
VAMP2	ENSG00000220205	6844	vesicle associated membrane protein 2 [Source:HGNC Symbol;Acc:HGNC:12643]	protein_coding	446.718	-0.609268	0.202114	-0.454929	0.231193	-3.01448	0.00257416	0.0689866	493.335	624.084	548.974	375.562	321.049	408.106	355.915
DYNLL1	ENSG00000088986	8655	dynein light chain LC8-type 1 [Source:HGNC Symbol;Acc:HGNC:15476]	protein_coding	3501.11	0.431561	0.143307	0.337023	0.157201	3.01145	0.00260006	0.0691017	3106.81	2541.43	3126.41	4734.5	3892.44	3277.09	3829.09
AFDN	ENSG00000130396	4301	afadin, adherens junction formation factor [Source:HGNC Symbol;Acc:HGNC:7137]	protein_coding	1474.02	-0.433258	0.143853	-0.343123	0.155922	-3.0118	0.00259701	0.0691017	1503.9	1942.08	1739.39	1176.36	1362.8	1353.89	1239.7
SALL2	ENSG00000165821	6297	spalt like transcription factor 2 [Source:HGNC Symbol;Acc:HGNC:10526]	protein_coding	769.13	-0.497485	0.165222	-0.381454	0.182929	-3.011	0.00260389	0.0691017	848.399	1002.32	914.357	603.322	637.669	743.773	634.072
OASL	ENSG00000135114	8638	2'-5'-oligoadenylate synthetase like [Source:HGNC Symbol;Acc:HGNC:8090]	protein_coding	14.6099	4.50221	1.49616	0.0254797	0.132583	3.00919	0.00261949	0.0693775	0	2.90948	0	9.69192	18.8201	5.10132	65.7462
HOXA5	ENSG00000106004	3202	homeobox A5 [Source:HGNC Symbol;Acc:HGNC:5106]	protein_coding	754.528	-0.538486	0.179014	-0.407273	0.200978	-3.00807	0.00262909	0.0694934	798.895	1031.41	919.744	552.44	746.161	622.361	610.681
NDUFAF8	ENSG00000224877	284184	NADH:ubiquinone oxidoreductase complex assembly factor 8 [Source:HGNC Symbol;Acc:HGNC:33551]	protein_coding	607.934	0.837442	0.278655	0.594288	0.347696	3.0053	0.00265315	0.0697976	623.07	222.575	416.556	914.675	649.847	628.483	800.334
SNRPE	ENSG00000182004	6635	small nuclear ribonucleoprotein polypeptide E [Source:HGNC Symbol;Acc:HGNC:11161]	protein_coding	3233.94	0.572156	0.190443	0.428541	0.219326	3.00434	0.00266155	0.0697976	2948.06	2119.56	2530.75	5113.7	3501.65	2561.88	3861.96
ATP5ME	ENSG00000169020	521	ATP synthase membrane subunit e [Source:HGNC Symbol;Acc:HGNC:846]	protein_coding	1310.2	0.483432	0.160882	0.369119	0.180741	3.00489	0.00265679	0.0697976	1164.2	864.116	1181.44	1691.24	1504.5	1349.81	1416.07
BTF3	ENSG00000145741	689	basic transcription factor 3 [Source:HGNC Symbol;Acc:HGNC:1125]	protein_coding	10600.5	0.389647	0.129642	0.308624	0.139482	3.00556	0.00265091	0.0697976	9979.36	7763.95	9312.35	13760.1	10063.2	11494.3	11830.5
RIMBP3C	ENSG00000183246	150221	RIMS binding protein 3C [Source:HGNC Symbol;Acc:HGNC:33892]	protein_coding	37.7753	-2.41867	0.805461	-0.0612632	0.150447	-3.00284	0.00267473	0.0698994	15.3634	120.743	73.1665	31.4988	6.64239	8.16212	8.85045
TRRAP	ENSG00000196367	8295	transformation/transcription domain associated protein [Source:HGNC Symbol;Acc:HGNC:12347]	protein_coding	1257.8	-0.485425	0.161663	-0.371282	0.178537	-3.0027	0.00267593	0.0698994	1213.71	1780.6	1506.42	1102.46	1171.27	1005.98	1024.12
BUD31	ENSG00000106245	8896	BUD31 homolog [Source:HGNC Symbol;Acc:HGNC:29629]	protein_coding	1358.82	0.45536	0.151696	0.352205	0.167776	3.00179	0.00268399	0.0699728	1182.98	997.952	1189.07	1709.41	1615.21	1291.65	1525.44
IRAK1BP1	ENSG00000146243	134728	interleukin 1 receptor associated kinase 1 binding protein 1 [Source:HGNC Symbol;Acc:HGNC:17368]	protein_coding	71.9771	1.35421	0.4515	0.914334	0.627665	2.99935	0.00270559	0.0703117	32.4338	34.9138	48.9273	106.611	73.0663	106.108	101.78
JAKMIP1	ENSG00000152969	152789	janus kinase and microtubule interacting protein 1 [Source:HGNC Symbol;Acc:HGNC:26460]	protein_coding	10.5027	-4.80644	1.60261	-0.0238228	0.132172	-2.99913	0.00270754	0.0703117	42.676	0	26.4836	1.21149	1.10706	2.04053	0
GSTM3	ENSG00000134202	2947	glutathione S-transferase mu 3 [Source:HGNC Symbol;Acc:HGNC:4635]	protein_coding	808.327	0.570263	0.190193	0.425715	0.219596	2.99834	0.00271455	0.0703138	701.593	533.89	667.925	1171.51	791.551	849.88	941.941
WNK4	ENSG00000126562	65266	WNK lysine deficient protein kinase 4 [Source:HGNC Symbol;Acc:HGNC:14544]	protein_coding	69.4125	-1.58145	0.527513	-1.08143	0.696557	-2.99793	0.00271818	0.0703138	141.684	82.9202	110.423	16.9609	65.3168	35.7093	32.8731
RPL34	ENSG00000109475	6164	ribosomal protein L34 [Source:HGNC Symbol;Acc:HGNC:10340]	protein_coding	9447.36	0.475325	0.158621	0.377585	0.176422	2.99661	0.00273003	0.0704834	8487.4	6568.15	8156.95	13122.9	11564.4	7706.06	10525.7
PGP	ENSG00000184207	283871	phosphoglycolate phosphatase [Source:HGNC Symbol;Acc:HGNC:8909]	protein_coding	1025.48	0.565853	0.188934	0.422844	0.217764	2.99498	0.00274462	0.070723	983.255	599.353	836.702	1382.31	1148.03	1029.45	1199.24
KCTD16	ENSG00000183775	57528	potassium channel tetramerization domain containing 16 [Source:HGNC Symbol;Acc:HGNC:29244]	protein_coding	8.88873	4.93176	1.64716	0.0204896	0.131291	2.9941	0.00275255	0.0707905	1.70704	0	0	9.69192	3.32119	10.2026	37.2983
PSMA5	ENSG00000143106	5686	proteasome 20S subunit alpha 5 [Source:HGNC Symbol;Acc:HGNC:9534]	protein_coding	2141.46	0.36814	0.123002	0.288651	0.13161	2.99296	0.00276288	0.0709193	1818	1723.87	1976.39	2446	2524.11	2200.71	2301.12
SLC22A18	ENSG00000110628	5002	solute carrier family 22 member 18 [Source:HGNC Symbol;Acc:HGNC:10964]	protein_coding	75.6377	-1.28042	0.428497	-0.88731	0.549037	-2.98816	0.00280659	0.0719027	121.2	112.015	108.628	37.5562	42.0685	61.2159	46.781
EIF4EBP1	ENSG00000187840	1978	eukaryotic translation initiation factor 4E binding protein 1 [Source:HGNC Symbol;Acc:HGNC:3288]	protein_coding	3250.5	0.404179	0.135292	0.317121	0.146643	2.98746	0.00281304	0.0719295	3122.18	2266.49	2857.09	3882.83	3256.98	3734.17	3633.74
RPL23	ENSG00000125691	9349	ribosomal protein L23 [Source:HGNC Symbol;Acc:HGNC:10316]	protein_coding	17353.1	0.403588	0.135297	0.316345	0.146863	2.98297	0.00285466	0.0728541	15668.9	12897.7	15459.2	23243.7	19686.9	15479.5	19035.4
PRPF8	ENSG00000174231	10594	pre-mRNA processing factor 8 [Source:HGNC Symbol;Acc:HGNC:17340]	protein_coding	3288.59	-0.48706	0.163328	-0.375208	0.181239	-2.98209	0.00286285	0.0729233	2977.08	4752.64	4049.3	2399.96	3309.02	2906.73	2625.42
CEP164	ENSG00000110274	22897	centrosomal protein 164 [Source:HGNC Symbol;Acc:HGNC:29182]	protein_coding	571.883	-0.5907	0.198177	-0.438057	0.226917	-2.98066	0.00287625	0.0731247	585.515	824.838	709.671	420.387	459.432	551.963	451.373
RGS4	ENSG00000117152	5999	regulator of G protein signaling 4 [Source:HGNC Symbol;Acc:HGNC:10000]	protein_coding	11.438	-3.95215	1.32677	-0.032727	0.135033	-2.97878	0.00289394	0.0734344	34.1408	18.9116	20.6482	0	0	5.10132	1.26435
EIF3M	ENSG00000149100	10480	eukaryotic translation initiation factor 3 subunit M [Source:HGNC Symbol;Acc:HGNC:24460]	protein_coding	4063.63	0.416987	0.140042	0.324342	0.152615	2.97759	0.00290525	0.0735812	3398.72	3318.26	3528.6	5541.36	4457.04	3635.2	4566.2
PRDX1	ENSG00000117450	5052	peroxiredoxin 1 [Source:HGNC Symbol;Acc:HGNC:9352]	protein_coding	6382.58	0.316863	0.106506	0.264464	0.111495	2.97507	0.00292925	0.0739082	5754.43	5062.5	6004.15	7139.31	6675.6	7289.79	6752.26
NPIPA5	ENSG00000183793	100288332	nuclear pore complex interacting protein family member A5 [Source:HGNC Symbol;Acc:HGNC:41980]	protein_coding	509.325	-0.646473	0.217255	-0.472717	0.253154	-2.97565	0.00292372	0.0739082	501.87	772.467	647.726	407.061	352.047	492.788	391.316
CELSR3	ENSG00000008300	1951	cadherin EGF LAG seven-pass G-type receptor 3 [Source:HGNC Symbol;Acc:HGNC:3230]	protein_coding	698.173	-0.61266	0.206022	-0.454583	0.237803	-2.97376	0.00294177	0.0740837	802.309	922.305	882.038	417.964	584.53	740.712	537.349
MEIG1	ENSG00000197889	644890	meiosis/spermiogenesis associated 1 [Source:HGNC Symbol;Acc:HGNC:23429]	protein_coding	9.03663	4.61972	1.5544	0.027059	0.133112	2.97204	0.00295831	0.0743568	1.70704	0	0.448875	10.9034	11.0706	21.4256	17.7009
UBR4	ENSG00000127481	23352	ubiquitin protein ligase E3 component n-recognin 4 [Source:HGNC Symbol;Acc:HGNC:30313]	protein_coding	1894.17	-0.544942	0.183391	-0.409166	0.20766	-2.97147	0.00296378	0.0743568	1799.22	2749.46	2365.12	1341.12	2092.35	1439.59	1472.34
KIF1A	ENSG00000130294	547	kinesin family member 1A [Source:HGNC Symbol;Acc:HGNC:888]	protein_coding	631.26	-0.587633	0.197822	-0.434568	0.22672	-2.97052	0.00297301	0.0744481	655.503	897.575	784.633	422.81	559.068	602.976	496.258
EMC6	ENSG00000127774	83460	ER membrane protein complex subunit 6 [Source:HGNC Symbol;Acc:HGNC:28430]	protein_coding	731.322	0.553524	0.186418	0.416694	0.214438	2.96927	0.00298511	0.0744989	684.523	442.241	608.674	903.772	822.549	814.171	843.322
SUPT6H	ENSG00000109111	6830	SPT6 homolog, histone chaperone and transcription elongation factor [Source:HGNC Symbol;Acc:HGNC:11470]	protein_coding	1494.23	-0.415953	0.140091	-0.328082	0.151303	-2.96915	0.00298622	0.0744989	1503.9	1974.08	1746.12	1307.2	1353.94	1310.02	1264.35
MYH9	ENSG00000100345	4627	myosin heavy chain 9 [Source:HGNC Symbol;Acc:HGNC:7579]	protein_coding	2161.6	-0.440608	0.148429	-0.33969	0.161864	-2.96847	0.00299288	0.0745255	2089.42	2960.4	2570.26	1742.12	2149.92	1834.44	1784.63
MCM3AP	ENSG00000160294	8888	minichromosome maintenance complex component 3 associated protein [Source:HGNC Symbol;Acc:HGNC:6946]	protein_coding	1295.18	-0.441699	0.148961	-0.339903	0.16244	-2.9652	0.00302485	0.075181	1543.16	1505.66	1520.79	938.905	1259.84	1213.09	1084.81
PRDX4	ENSG00000123131	10549	peroxiredoxin 4 [Source:HGNC Symbol;Acc:HGNC:17169]	protein_coding	4090.62	0.441365	0.148994	0.339241	0.164527	2.9623	0.00305354	0.0754716	3946.68	2681.09	3578.43	4924.71	5093.6	3865.78	4544.08
UQCRC1	ENSG00000010256	7384	ubiquinol-cytochrome c reductase core protein 1 [Source:HGNC Symbol;Acc:HGNC:12585]	protein_coding	4065.26	0.366815	0.123787	0.28911	0.133219	2.96327	0.00304394	0.0754716	3545.52	2998.22	3949.65	4533.4	4739.34	4544.26	4146.44
PACS2	ENSG00000179364	23241	phosphofurin acidic cluster sorting protein 2 [Source:HGNC Symbol;Acc:HGNC:23794]	protein_coding	592.115	-0.511829	0.172776	-0.386458	0.193058	-2.96239	0.00305263	0.0754716	705.008	733.189	701.591	456.732	503.714	554.004	490.568
BCAT2	ENSG00000105552	587	branched chain amino acid transaminase 2 [Source:HGNC Symbol;Acc:HGNC:977]	protein_coding	795.947	0.70017	0.236664	0.50283	0.286402	2.9585	0.00309143	0.0761194	471.143	705.549	587.577	944.963	586.744	1242.68	1032.97
MRPS18B	ENSG00000204568	28973	mitochondrial ribosomal protein S18B [Source:HGNC Symbol;Acc:HGNC:14516]	protein_coding	999.819	0.478773	0.161859	0.364642	0.18101	2.95795	0.00309689	0.0761194	850.106	752.101	852.862	951.02	1130.31	1307.98	1154.35
TCHP	ENSG00000139437	84260	trichoplein keratin filament binding [Source:HGNC Symbol;Acc:HGNC:28135]	protein_coding	280.891	-0.704116	0.238025	-0.505864	0.282432	-2.95816	0.00309478	0.0761194	324.338	404.418	351.02	197.473	221.413	252.005	215.572
RAB5IF	ENSG00000101084	55969	RAB5 interacting factor [Source:HGNC Symbol;Acc:HGNC:15870]	protein_coding	523.272	0.680086	0.230185	0.488221	0.278336	2.95452	0.00313157	0.0767735	467.729	295.312	408.476	705.087	694.129	458.099	634.072
ERGIC3	ENSG00000125991	51614	ERGIC and golgi 3 [Source:HGNC Symbol;Acc:HGNC:15927]	protein_coding	3253.27	0.33947	0.114912	0.274399	0.121501	2.95418	0.00313503	0.0767735	2973.66	2519.61	2995.79	3583.59	3717.52	3476.04	3506.68
TSEN34	ENSG00000170892	79042	tRNA splicing endonuclease subunit 34 [Source:HGNC Symbol;Acc:HGNC:15506]	protein_coding	644.707	0.629392	0.213143	0.465515	0.251613	2.95291	0.00314796	0.0769489	599.171	365.14	514.41	839.563	597.815	819.272	777.576
FBLL1	ENSG00000188573	345630	fibrillarin like 1 [Source:HGNC Symbol;Acc:HGNC:35458]	protein_coding	9.07447	5.50798	1.86611	0.0177734	0.130804	2.95158	0.00316151	0.0771385	0	0	0.448875	25.4413	24.3554	0	13.2757
HLA-DRB1	ENSG00000196126	3123	major histocompatibility complex, class II, DR beta 1 [Source:HGNC Symbol;Acc:HGNC:4948]	protein_coding	67.2029	1.69867	0.575756	1.10169	0.873269	2.95033	0.00317439	0.0771701	13.6563	43.6422	31.4212	123.572	36.5331	112.229	109.366
GNB1L	ENSG00000185838	54584	G protein subunit beta 1 like [Source:HGNC Symbol;Acc:HGNC:4397]	protein_coding	276.158	0.72082	0.244305	0.511584	0.299902	2.9505	0.00317262	0.0771701	186.067	200.754	219.5	313.776	288.944	392.802	331.26
PLPPR3	ENSG00000129951	79948	phospholipid phosphatase related 3 [Source:HGNC Symbol;Acc:HGNC:23497]	protein_coding	174.843	1.50242	0.509838	0.978649	0.762996	2.94687	0.0032101	0.0778962	155.341	30.5496	71.8199	105.4	154.989	416.268	289.536
PRAC2	ENSG00000229637	360205	PRAC2 small nuclear protein [Source:HGNC Symbol;Acc:HGNC:30143]	protein_coding	23.4768	2.71207	0.9211	1.6653	1.67167	2.94439	0.00323597	0.0780923	11.9493	0	5.38649	44.8251	24.3554	36.7295	41.0914
COPS8	ENSG00000198612	10920	COP9 signalosome subunit 8 [Source:HGNC Symbol;Acc:HGNC:24335]	protein_coding	1105.69	0.616082	0.209397	0.449257	0.247388	2.94217	0.00325922	0.0780923	1048.12	637.176	863.186	1694.88	1000.79	1158	1337.68
LSM4	ENSG00000130520	25804	LSM4 homolog, U6 small nuclear RNA and mRNA degradation associated [Source:HGNC Symbol;Acc:HGNC:17259]	protein_coding	3745.55	0.405527	0.137811	0.314885	0.149807	2.94264	0.00325427	0.0780923	3719.64	2505.06	3269.6	4288.68	4275.48	3962.71	4197.64
BMPER	ENSG00000164619	168667	BMP binding endothelial regulator [Source:HGNC Symbol;Acc:HGNC:24154]	protein_coding	13.8019	4.71622	1.60183	0.0224727	0.131816	2.94427	0.00323712	0.0780923	1.70704	1.45474	0	4.84596	42.0685	1.02026	45.5166
DCAF1	ENSG00000145041	9730	DDB1 and CUL4 associated factor 1 [Source:HGNC Symbol;Acc:HGNC:30911]	protein_coding	739.017	-0.510065	0.17326	-0.38502	0.193951	-2.94394	0.00324067	0.0780923	745.977	1035.78	885.629	659.051	608.885	631.544	606.256
ATN1	ENSG00000111676	1822	atrophin 1 [Source:HGNC Symbol;Acc:HGNC:3033]	protein_coding	891.05	-0.522053	0.177369	-0.389519	0.19968	-2.94332	0.00324709	0.0780923	918.388	1230.71	1078.65	637.244	774.945	885.59	711.829
DNASE1	ENSG00000213918	1773	deoxyribonuclease 1 [Source:HGNC Symbol;Acc:HGNC:2956]	protein_coding	194.641	-0.905426	0.307717	-0.622599	0.387581	-2.9424	0.00325677	0.0780923	179.239	352.047	262.592	152.648	139.49	141.817	134.653
SF3B5	ENSG00000169976	83443	splicing factor 3b subunit 5 [Source:HGNC Symbol;Acc:HGNC:21083]	protein_coding	2794.53	0.452755	0.154005	0.340872	0.173218	2.93987	0.00328347	0.078532	2386.44	1872.25	2691	3624.78	3404.22	2749.61	2833.41
DDX11	ENSG00000013573	1663	DEAD/H-box helicase 11 [Source:HGNC Symbol;Acc:HGNC:2736]	protein_coding	1311.93	-0.413528	0.140691	-0.321248	0.152007	-2.93926	0.00329	0.0785473	1392.94	1661.31	1529.32	1056.42	1192.31	1238.6	1112.63
MT-ATP6	ENSG00000198899	4508	mitochondrially encoded ATP synthase membrane subunit 6 [Source:HGNC Symbol;Acc:HGNC:7414]	protein_coding	89296.7	0.365271	0.124341	0.26766	0.132613	2.93764	0.0033072	0.0788166	90753.1	61132.6	78451.6	97333.6	96234.9	101118	100052
MRPS36	ENSG00000134056	92259	mitochondrial ribosomal protein S36 [Source:HGNC Symbol;Acc:HGNC:16631]	protein_coding	481.065	0.673357	0.229427	0.480059	0.278189	2.93495	0.00333599	0.0793609	368.721	333.136	377.503	757.182	421.792	532.578	576.544
MYO9A	ENSG00000066933	4649	myosin IXA [Source:HGNC Symbol;Acc:HGNC:7608]	protein_coding	725.011	-0.741776	0.252809	-0.523294	0.306364	-2.93413	0.00334482	0.079429	1142.01	712.823	961.938	470.058	863.51	410.146	514.591
MEGF8	ENSG00000105429	1954	multiple EGF like domains 8 [Source:HGNC Symbol;Acc:HGNC:3233]	protein_coding	563.449	-0.580085	0.197825	-0.424757	0.227413	-2.93231	0.00336454	0.0797552	553.081	833.566	694.409	436.137	501.5	478.504	446.948
CCDC107	ENSG00000159884	203260	coiled-coil domain containing 107 [Source:HGNC Symbol;Acc:HGNC:28465]	protein_coding	159.45	1.17085	0.399407	0.773808	0.561734	2.93146	0.00337373	0.0798309	136.563	48.0064	96.508	235.029	122.884	248.945	228.215
KNTC1	ENSG00000184445	9735	kinetochore associated 1 [Source:HGNC Symbol;Acc:HGNC:17255]	protein_coding	1054.33	-0.504798	0.172342	-0.377327	0.193061	-2.92905	0.0034	0.08031	1017.4	1507.11	1273.46	948.597	981.966	795.806	855.965
MCC	ENSG00000171444	4163	MCC regulator of WNT signaling pathway [Source:HGNC Symbol;Acc:HGNC:6935]	protein_coding	262.215	-0.740848	0.253247	-0.522604	0.305919	-2.9254	0.00344016	0.0811146	274.833	408.782	335.758	188.993	204.807	224.458	197.871
C2CD2L	ENSG00000172375	9854	C2CD2 like [Source:HGNC Symbol;Acc:HGNC:29000]	protein_coding	230.032	-0.894088	0.305718	-0.614863	0.384745	-2.92455	0.00344955	0.0811925	269.712	354.957	310.621	127.206	140.597	250.985	156.147
OR2C1	ENSG00000168158	4993	olfactory receptor family 2 subfamily C member 1 [Source:HGNC Symbol;Acc:HGNC:8242]	protein_coding	6.39004	-6.42361	2.19742	-0.0144624	0.130217	-2.92325	0.00346396	0.0813878	29.0197	0	15.7106	0	0	0	0
NUDT18	ENSG00000275074	79873	nudix hydrolase 18 [Source:HGNC Symbol;Acc:HGNC:26194]	protein_coding	158.552	1.33568	0.457005	0.867772	0.673323	2.92268	0.00347027	0.0813926	145.098	29.0948	81.6952	256.836	236.912	119.371	240.859
RPL6	ENSG00000089009	6128	ribosomal protein L6 [Source:HGNC Symbol;Acc:HGNC:10362]	protein_coding	22779.1	0.289392	0.0991398	0.237438	0.10258	2.91903	0.00351122	0.0820964	20653.5	18801.1	21277.1	26800.6	23170.9	24482.3	24268.6
STK36	ENSG00000163482	27148	serine/threonine kinase 36 [Source:HGNC Symbol;Acc:HGNC:17209]	protein_coding	268.103	-0.738526	0.253014	-0.520927	0.305909	-2.91891	0.00351261	0.0820964	310.681	386.961	344.287	164.763	226.948	240.782	202.296
ZBBX	ENSG00000169064	79740	zinc finger B-box domain containing [Source:HGNC Symbol;Acc:HGNC:26245]	protein_coding	8.99205	4.61807	1.58286	0.0237422	0.132145	2.91755	0.00352794	0.0823104	0	0	1.7955	23.0183	17.713	7.14185	13.2757
CTSH	ENSG00000103811	1512	cathepsin H [Source:HGNC Symbol;Acc:HGNC:2535]	protein_coding	571.115	0.529317	0.181621	0.394608	0.208903	2.91441	0.00356365	0.082709	491.628	385.506	493.313	678.435	663.132	639.706	646.083
COX7C	ENSG00000127184	1350	cytochrome c oxidase subunit 7C [Source:HGNC Symbol;Acc:HGNC:2292]	protein_coding	6893.15	0.473608	0.162495	0.356063	0.18366	2.9146	0.00356149	0.082709	6220.45	4516.97	6224.99	9602.27	8438.05	5883.87	7365.47
TNNC1	ENSG00000114854	7134	troponin C1, slow skeletal and cardiac type [Source:HGNC Symbol;Acc:HGNC:11943]	protein_coding	12.9116	4.52903	1.55349	0.0236265	0.132085	2.91539	0.00355239	0.082709	1.70704	1.45474	0	27.8643	1.10706	10.2026	48.0453
SDHC	ENSG00000143252	6391	succinate dehydrogenase complex subunit C [Source:HGNC Symbol;Acc:HGNC:10682]	protein_coding	1870.05	0.446955	0.153479	0.33875	0.170268	2.91215	0.00358951	0.0830887	1848.72	1205.98	1600.69	1988.06	2169.85	2146.64	2130.43
LARP1	ENSG00000155506	23367	La ribonucleoprotein 1, translational regulator [Source:HGNC Symbol;Acc:HGNC:29531]	protein_coding	2904.85	-0.399559	0.137216	-0.314026	0.147852	-2.91189	0.00359249	0.0830887	3212.65	3476.83	3411.9	2089.82	2955.86	2735.33	2451.58
POMP	ENSG00000132963	51371	proteasome maturation protein [Source:HGNC Symbol;Acc:HGNC:20330]	protein_coding	1764.28	0.549008	0.188702	0.397538	0.219267	2.90939	0.00362133	0.0836106	1538.04	1235.07	1417.55	2792.49	1753.59	1536.52	2076.7
ACLY	ENSG00000131473	47	ATP citrate lyase [Source:HGNC Symbol;Acc:HGNC:115]	protein_coding	3696.57	-0.396456	0.136325	-0.309906	0.146708	-2.90817	0.00363552	0.0837932	3726.47	4751.18	4363.06	2762.2	3652.21	3508.69	3112.2
MRPS18C	ENSG00000163319	51023	mitochondrial ribosomal protein S18C [Source:HGNC Symbol;Acc:HGNC:16633]	protein_coding	960.597	0.572344	0.197051	0.414175	0.231196	2.90455	0.00367783	0.0843119	851.813	629.903	776.553	1377.46	1152.45	810.09	1125.9
TIMM50	ENSG00000105197	92609	translocase of inner mitochondrial membrane 50 [Source:HGNC Symbol;Acc:HGNC:23656]	protein_coding	2035.85	0.395296	0.136094	0.305269	0.147972	2.90458	0.00367743	0.0843119	1891.4	1440.19	1853.85	2381.79	2177.6	2301.72	2204.39
NPIPB3	ENSG00000169246	23117	nuclear pore complex interacting protein family member B3 [Source:HGNC Symbol;Acc:HGNC:28989]	protein_coding	957.836	-0.486341	0.167468	-0.364219	0.186728	-2.90408	0.00368335	0.0843119	1065.19	1219.07	1146.43	711.145	999.679	774.381	788.955
ESPL1	ENSG00000135476	9700	extra spindle pole bodies like 1, separase [Source:HGNC Symbol;Acc:HGNC:16856]	protein_coding	804.52	-0.487512	0.167822	-0.364225	0.18713	-2.90494	0.00367328	0.0843119	863.762	1061.96	956.552	654.205	794.872	634.605	665.681
MLLT6	ENSG00000275023	4302	MLLT6, PHD finger containing [Source:HGNC Symbol;Acc:HGNC:7138]	protein_coding	991.741	-0.434469	0.149664	-0.332325	0.163442	-2.90297	0.00369639	0.0844653	1107.87	1221.98	1161.24	770.508	901.151	938.643	840.793
OLIG1	ENSG00000184221	116448	oligodendrocyte transcription factor 1 [Source:HGNC Symbol;Acc:HGNC:16983]	protein_coding	13.8424	4.88401	1.68281	0.0203031	0.131318	2.90228	0.00370453	0.0845064	1.70704	1.45474	0	1.21149	1.10706	59.1753	32.2409
CMC1	ENSG00000187118	152100	C-X9-C motif containing 1 [Source:HGNC Symbol;Acc:HGNC:28783]	protein_coding	222.936	0.870865	0.3002	0.586639	0.395914	2.90095	0.00372039	0.084579	194.603	97.4676	164.737	299.238	230.269	289.755	284.479
RPL17	ENSG00000265681	6139	ribosomal protein L17 [Source:HGNC Symbol;Acc:HGNC:10307]	protein_coding	582.729	0.643784	0.221922	0.455883	0.268184	2.90094	0.00372041	0.084579	421.639	445.151	458.75	776.565	819.228	456.058	701.714
ISCA2	ENSG00000165898	122961	iron-sulfur cluster assembly 2 [Source:HGNC Symbol;Acc:HGNC:19857]	protein_coding	644.425	0.693307	0.239076	0.487658	0.294146	2.89994	0.00373231	0.0847049	653.796	299.677	478.949	776.565	863.51	648.888	789.587
PLEKHM3	ENSG00000178385	389072	pleckstrin homology domain containing M3 [Source:HGNC Symbol;Acc:HGNC:34006]	protein_coding	242.14	-0.70362	0.242793	-0.495218	0.291847	-2.89802	0.00375523	0.0850802	336.287	296.767	298.502	192.627	181.559	198.952	190.285
RHOBTB1	ENSG00000072422	9886	Rho related BTB domain containing 1 [Source:HGNC Symbol;Acc:HGNC:18738]	protein_coding	187.344	-0.859431	0.29665	-0.587633	0.373107	-2.89712	0.00376609	0.0851815	204.845	305.496	243.739	155.071	154.989	113.249	134.021
LAGE3	ENSG00000196976	8270	L antigen family member 3 [Source:HGNC Symbol;Acc:HGNC:26058]	protein_coding	1190.9	0.580801	0.200573	0.418851	0.236151	2.89571	0.00378298	0.0854184	1227.36	622.629	941.29	1423.5	1212.24	1469.18	1440.1
SLC2A14	ENSG00000173262	144195	solute carrier family 2 member 14 [Source:HGNC Symbol;Acc:HGNC:18301]	protein_coding	8.24904	4.69138	1.62148	0.0229415	0.131944	2.89327	0.0038125	0.0859393	0	0	1.34662	21.8068	6.64239	15.304	12.6435
SERPING1	ENSG00000149131	710	serpin family G member 1 [Source:HGNC Symbol;Acc:HGNC:1228]	protein_coding	49.376	1.80231	0.623587	1.09466	1.08681	2.89022	0.00384967	0.0866307	8.5352	32.0043	20.6482	66.632	37.6402	103.047	77.1254
SLC30A3	ENSG00000115194	7781	solute carrier family 30 member 3 [Source:HGNC Symbol;Acc:HGNC:11014]	protein_coding	106.278	1.25065	0.432934	0.794872	0.648515	2.88878	0.00386739	0.0868826	54.6253	61.0991	63.7402	65.4205	174.916	172.425	151.722
GYS1	ENSG00000104812	2997	glycogen synthase 1 [Source:HGNC Symbol;Acc:HGNC:4706]	protein_coding	490.747	-0.539126	0.18667	-0.393687	0.212663	-2.88813	0.00387545	0.0869171	541.132	661.907	585.781	397.369	439.505	408.106	401.431
IFITM2	ENSG00000185201	10581	interferon induced transmembrane protein 2 [Source:HGNC Symbol;Acc:HGNC:5413]	protein_coding	869.779	0.587772	0.203614	0.421304	0.241076	2.8867	0.00389307	0.0871011	882.54	459.698	689.022	1050.36	997.465	976.393	1032.97
SIM1	ENSG00000112246	6492	SIM bHLH transcription factor 1 [Source:HGNC Symbol;Acc:HGNC:10882]	protein_coding	34.846	2.54086	0.880284	0.0450736	0.140326	2.8864	0.00389673	0.0871011	22.1915	1.45474	5.38649	98.1307	26.5695	19.385	70.8036
RNF5	ENSG00000204308	6048	ring finger protein 5 [Source:HGNC Symbol;Acc:HGNC:10068]	protein_coding	912.833	0.47946	0.166311	0.355497	0.188065	2.88292	0.00394013	0.0874841	831.329	618.265	790.468	1133.96	941.005	1043.73	1031.08
CLUH	ENSG00000132361	23277	clustered mitochondria homolog [Source:HGNC Symbol;Acc:HGNC:29094]	protein_coding	866.876	-0.522181	0.181055	-0.383882	0.205286	-2.8841	0.00392535	0.0874841	966.185	1120.15	1055.75	591.207	724.02	914.157	696.657
TANC2	ENSG00000170921	26115	tetratricopeptide repeat, ankyrin repeat and coiled-coil containing 2 [Source:HGNC Symbol;Acc:HGNC:30212]	protein_coding	529.779	-0.686723	0.238127	-0.480945	0.287381	-2.88385	0.0039284	0.0874841	518.94	814.655	689.92	299.238	495.965	500.95	388.788
KIAA0895L	ENSG00000196123	653319	KIAA0895 like [Source:HGNC Symbol;Acc:HGNC:34408]	protein_coding	214.237	-0.836035	0.289951	-0.572043	0.364203	-2.88336	0.00393457	0.0874841	261.177	312.769	283.24	165.974	115.135	207.114	154.251
MSRA	ENSG00000175806	4482	methionine sulfoxide reductase A [Source:HGNC Symbol;Acc:HGNC:7377]	protein_coding	17.9225	3.98632	1.38354	0.0251076	0.132436	2.88125	0.00396103	0.0878017	3.41408	1.45474	0	2.42298	27.6766	10.2026	80.2863
WBP1	ENSG00000239779	23559	WW domain binding protein 1 [Source:HGNC Symbol;Acc:HGNC:12737]	protein_coding	98.9388	1.13535	0.395049	0.719056	0.585994	2.87395	0.00405377	0.0896687	66.5746	43.6422	67.3312	110.246	160.524	115.29	128.964
BABAM1	ENSG00000105393	29086	BRISC and BRCA1 A complex member 1 [Source:HGNC Symbol;Acc:HGNC:25008]	protein_coding	320.638	0.693935	0.24149	0.477997	0.301376	2.87356	0.00405872	0.0896687	271.419	184.752	257.205	444.617	349.832	356.072	380.569
MGAM	ENSG00000257335	8972	maltase-glucoamylase [Source:HGNC Symbol;Acc:HGNC:7043]	protein_coding	6.12883	-6.36754	2.21658	-0.0141535	0.130166	-2.87269	0.00406998	0.0897687	0	27.6401	15.2617	0	0	0	0
CKS1B	ENSG00000173207	1163	CDC28 protein kinase regulatory subunit 1B [Source:HGNC Symbol;Acc:HGNC:19083]	protein_coding	2840.97	0.471932	0.164404	0.343495	0.18552	2.87055	0.00409753	0.0901973	2715.9	1898.44	2376.34	4047.59	2826.34	2737.37	3284.78
GATM	ENSG00000171766	2628	glycine amidinotransferase [Source:HGNC Symbol;Acc:HGNC:4175]	protein_coding	7.94851	-4.74912	1.65467	-0.0235106	0.132071	-2.87014	0.00410295	0.0901973	3.41408	26.1853	22.8926	0	1.10706	2.04053	0
BIK	ENSG00000100290	638	BCL2 interacting killer [Source:HGNC Symbol;Acc:HGNC:1051]	protein_coding	12.4771	3.85578	1.34528	0.0281731	0.13342	2.86615	0.00415496	0.09119	0	4.36422	0.448875	20.5953	29.8907	6.12159	25.9192
ATP1B3	ENSG00000069849	483	ATPase Na+/K+ transporting subunit beta 3 [Source:HGNC Symbol;Acc:HGNC:806]	protein_coding	2426.24	0.342164	0.119485	0.273078	0.126601	2.86366	0.00418779	0.0916088	2249.88	1888.25	2186.47	2611.97	2592.75	2772.06	2682.32
WNK1	ENSG00000060237	65125	WNK lysine deficient protein kinase 1 [Source:HGNC Symbol;Acc:HGNC:14540]	protein_coding	1431.32	-0.366069	0.127815	-0.284339	0.135722	-2.86406	0.0041825	0.0916088	1700.21	1598.76	1621.78	1241.78	1244.34	1360.01	1252.34
GPC2	ENSG00000213420	221914	glypican 2 [Source:HGNC Symbol;Acc:HGNC:4450]	protein_coding	34.7619	-1.76073	0.615192	-0.0908918	0.178472	-2.86209	0.00420862	0.0919135	75.1098	46.5517	52.9672	14.5379	17.713	19.385	17.0687
SMARCC2	ENSG00000139613	6601	SWI/SNF related, matrix associated, actin dependent regulator of chromatin subfamily c member 2 [Source:HGNC Symbol;Acc:HGNC:11105]	protein_coding	903.017	-0.441729	0.154405	-0.331261	0.169547	-2.86084	0.00422516	0.0921237	966.185	1168.16	1050.82	745.067	855.761	773.361	761.771
SOD1	ENSG00000142168	6647	superoxide dismutase 1 [Source:HGNC Symbol;Acc:HGNC:11179]	protein_coding	8894.85	0.367384	0.128454	0.285016	0.137818	2.86004	0.00423587	0.0922063	8263.78	6760.18	7898.85	11740.6	9089	8674.29	9837.28
TMEM243	ENSG00000135185	79161	transmembrane protein 243 [Source:HGNC Symbol;Acc:HGNC:21707]	protein_coding	259.094	0.874533	0.30603	0.576841	0.411597	2.85767	0.00426758	0.0924435	151.927	194.935	181.794	186.57	428.434	325.464	344.535
IDI1	ENSG00000067064	3422	isopentenyl-diphosphate delta isomerase 1 [Source:HGNC Symbol;Acc:HGNC:5387]	protein_coding	1814.2	0.459086	0.160642	0.3416	0.18021	2.85782	0.00426567	0.0924435	1686.56	1251.08	1552.66	2458.11	1998.25	1695.68	2057.1
SMIM38	ENSG00000284713	107984345	small integral membrane protein 38 [Source:HGNC Symbol;Acc:HGNC:54074]	protein_coding	5.50957	-5.45885	1.9102	-0.019839	0.131233	-2.85773	0.00426679	0.0924435	11.9493	17.4569	8.52862	0	0	0	0.632175
TMEM147	ENSG00000105677	10430	transmembrane protein 147 [Source:HGNC Symbol;Acc:HGNC:30414]	protein_coding	1615.79	0.550321	0.192741	0.395295	0.225494	2.85524	0.00430045	0.0930041	1688.26	862.661	1287.82	2057.11	1642.88	1835.46	1936.35
LOXL2	ENSG00000134013	4017	lysyl oxidase like 2 [Source:HGNC Symbol;Acc:HGNC:6666]	protein_coding	279.685	-0.669482	0.234552	-0.465592	0.282302	-2.85429	0.00431325	0.09313	312.388	407.327	343.389	218.068	234.698	224.458	217.468
PPP1R14A	ENSG00000167641	94274	protein phosphatase 1 regulatory inhibitor subunit 14A [Source:HGNC Symbol;Acc:HGNC:14871]	protein_coding	247.971	0.824152	0.28891	0.544296	0.384613	2.85263	0.00433593	0.0934438	215.087	119.289	184.487	358.601	238.019	311.181	309.134
TBC1D3E	ENSG00000278599	102723859	TBC1 domain family member 3E [Source:HGNC Symbol;Acc:HGNC:27071]	protein_coding	51.4307	-1.5179	0.532267	-0.114974	0.213739	-2.85176	0.00434776	0.0934438	93.8872	72.737	79.0019	18.1724	26.5695	41.8308	27.8157
NIBAN1	ENSG00000135842	116496	niban apoptosis regulator 1 [Source:HGNC Symbol;Acc:HGNC:16784]	protein_coding	98.2536	-1.24731	0.437395	-0.789431	0.623039	-2.85168	0.00434883	0.0934438	99.0083	199.299	140.049	55.7286	95.2075	42.8511	55.6314
LAPTM4A	ENSG00000068697	9741	lysosomal protein transmembrane 4 alpha [Source:HGNC Symbol;Acc:HGNC:6924]	protein_coding	1521.66	0.391275	0.137273	0.299061	0.149002	2.85033	0.00436733	0.0936901	1280.28	1253.99	1347.52	1479.23	1886.44	1704.86	1699.29
NBPF20	ENSG00000162825	100288142	NBPF member 20 [Source:HGNC Symbol;Acc:HGNC:32000]	protein_coding	649.872	-0.514963	0.180834	-0.373359	0.205358	-2.8477	0.00440358	0.0943158	648.675	917.941	782.837	550.017	564.603	554.004	531.027
DDX17	ENSG00000100201	10521	DEAD-box helicase 17 [Source:HGNC Symbol;Acc:HGNC:2740]	protein_coding	8860.71	-0.287801	0.101122	-0.238045	0.104115	-2.84608	0.00442616	0.0944112	9100.23	10583.2	9940.33	7984.93	8548.75	7975.41	7892.08
ERO1A	ENSG00000197930	30001	endoplasmic reticulum oxidoreductase 1 alpha [Source:HGNC Symbol;Acc:HGNC:13280]	protein_coding	1302.48	-0.381033	0.133876	-0.293372	0.143253	-2.84617	0.00442483	0.0944112	1544.87	1466.38	1490.71	1201.8	1058.35	1219.22	1136.02
IRGQ	ENSG00000167378	126298	immunity related GTPase Q [Source:HGNC Symbol;Acc:HGNC:24868]	protein_coding	336.609	-0.632364	0.222206	-0.444514	0.264224	-2.84585	0.00442929	0.0944112	406.276	445.151	413.862	231.395	276.766	317.302	265.514
TRMO	ENSG00000136932	51531	tRNA methyltransferase O [Source:HGNC Symbol;Acc:HGNC:30967]	protein_coding	130.528	1.0364	0.364727	0.647685	0.54104	2.84158	0.00448902	0.0955315	102.422	53.8254	89.7749	195.05	130.634	174.465	167.526
YDJC	ENSG00000161179	150223	YdjC chitooligosaccharide deacetylase homolog [Source:HGNC Symbol;Acc:HGNC:27158]	protein_coding	2143.62	0.40458	0.142438	0.305957	0.155861	2.8404	0.00450567	0.0957025	2079.17	1466.38	1891.56	2557.46	2344.76	2278.25	2387.73
CCDC38	ENSG00000165972	120935	coiled-coil domain containing 38 [Source:HGNC Symbol;Acc:HGNC:26843]	protein_coding	7.09414	-5.19811	1.83032	-0.0213544	0.131555	-2.84	0.00451142	0.0957025	29.0197	1.45474	17.0572	0	1.10706	1.02026	0
COPE	ENSG00000105669	11316	COPI coat complex subunit epsilon [Source:HGNC Symbol;Acc:HGNC:2234]	protein_coding	1698	0.514049	0.181038	0.369514	0.208997	2.83945	0.0045191	0.095713	1748.01	974.676	1379.39	1846.31	1743.63	2174.18	2019.8
AKAP12	ENSG00000131016	9590	A-kinase anchoring protein 12 [Source:HGNC Symbol;Acc:HGNC:370]	protein_coding	1674.64	-0.419865	0.147924	-0.315803	0.161326	-2.83838	0.00453432	0.0958138	1596.08	2289.76	1975.95	1438.04	1508.93	1514.07	1399.64
ADAMTS13	ENSG00000160323	11093	ADAM metallopeptidase with thrombospondin type 1 motif 13 [Source:HGNC Symbol;Acc:HGNC:1366]	protein_coding	183.078	-0.866003	0.305134	-0.572179	0.396003	-2.8381	0.00453825	0.0958138	240.693	256.034	242.392	96.9192	138.383	177.526	129.596
ITGB1BP2	ENSG00000147166	26548	integrin subunit beta 1 binding protein 2 [Source:HGNC Symbol;Acc:HGNC:6154]	protein_coding	13.1936	4.7983	1.69539	0.0196706	0.131167	2.83021	0.00465176	0.0980551	1.70704	1.45474	0	1.21149	55.3532	1.02026	31.6088
NSMCE2	ENSG00000156831	286053	NSE2 (MMS21) homolog, SMC5-SMC6 complex SUMO ligase [Source:HGNC Symbol;Acc:HGNC:26513]	protein_coding	203.689	0.778549	0.275626	0.509592	0.366091	2.82466	0.00473307	0.0996112	139.977	130.927	165.186	265.316	270.124	207.114	247.181
YME1L1	ENSG00000136758	10730	YME1 like 1 ATPase [Source:HGNC Symbol;Acc:HGNC:12843]	protein_coding	2293.75	0.343772	0.121726	0.266477	0.129329	2.82414	0.00474072	0.099615	1836.78	2038.09	2097.59	2716.16	2542.93	2328.24	2496.46
COPRS	ENSG00000172301	55352	coordinator of PRMT5 and differentiation stimulator [Source:HGNC Symbol;Acc:HGNC:28848]	protein_coding	753.265	0.564316	0.199874	0.395831	0.23733	2.82336	0.00475228	0.0997007	674.281	493.157	611.816	940.117	647.633	1010.06	895.792
PACSIN1	ENSG00000124507	29993	protein kinase C and casein kinase substrate in neurons 1 [Source:HGNC Symbol;Acc:HGNC:8570]	protein_coding	29.4964	-2.16646	0.768724	-0.0629901	0.151428	-2.81826	0.00482853	0.101141	27.3126	78.556	52.5183	3.63447	16.606	18.3648	9.48263
STAT5A	ENSG00000126561	6776	signal transducer and activator of transcription 5A [Source:HGNC Symbol;Acc:HGNC:11366]	protein_coding	10.6805	4.51748	1.6038	0.0225916	0.131838	2.81674	0.00485137	0.10146	1.70704	1.45474	0	1.21149	18.8201	27.5471	24.0227
KIAA1109	ENSG00000138688	84162	KIAA1109 [Source:HGNC Symbol;Acc:HGNC:26953]	protein_coding	470.346	-0.600838	0.213476	-0.417848	0.253002	-2.81455	0.00488455	0.101994	524.061	640.086	585.332	310.142	479.359	383.619	369.823
CALM1	ENSG00000198668	801	calmodulin 1 [Source:HGNC Symbol;Acc:HGNC:1442]	protein_coding	4961.56	0.339924	0.120832	0.264661	0.128192	2.81319	0.00490529	0.102266	4646.56	3786.69	4508.5	6127.72	5134.57	5131.93	5394.98
DUSP11	ENSG00000144048	8446	dual specificity phosphatase 11 [Source:HGNC Symbol;Acc:HGNC:3066]	protein_coding	384.991	0.695457	0.247292	0.463978	0.315069	2.81229	0.00491904	0.102393	336.287	222.575	298.053	334.371	547.997	476.464	479.189
CDKN3	ENSG00000100526	1033	cyclin dependent kinase inhibitor 3 [Source:HGNC Symbol;Acc:HGNC:1791]	protein_coding	969.576	0.51403	0.182907	0.365974	0.212419	2.81033	0.004949	0.102486	879.126	648.814	813.361	1373.83	1019.61	939.664	1112.63
ECPAS	ENSG00000136813	23392	Ecm29 proteasome adaptor and scaffold [Source:HGNC Symbol;Acc:HGNC:29020]	protein_coding	1073.77	-0.500753	0.178205	-0.36125	0.202204	-2.80999	0.0049543	0.102486	1111.28	1448.92	1303.08	902.56	1135.85	744.793	869.873
OGDH	ENSG00000105953	4967	oxoglutarate dehydrogenase [Source:HGNC Symbol;Acc:HGNC:8124]	protein_coding	587.459	-0.503923	0.179272	-0.365006	0.203492	-2.81094	0.00493968	0.102486	640.14	776.831	699.347	449.463	524.749	538.7	482.982
FAM160A1	ENSG00000164142	729830	family with sequence similarity 160 member A1 [Source:HGNC Symbol;Acc:HGNC:34237]	protein_coding	152.403	-0.86043	0.306096	-0.558367	0.402356	-2.81098	0.00493901	0.102486	218.501	202.209	193.465	117.515	130.634	93.8643	110.631
RAB1A	ENSG00000138069	5861	RAB1A, member RAS oncogene family [Source:HGNC Symbol;Acc:HGNC:9758]	protein_coding	1966.56	0.438773	0.15624	0.324493	0.174199	2.80832	0.00498002	0.102859	1708.75	1518.75	1684.18	2696.78	1732.56	2181.33	2243.59
MFHAS1	ENSG00000147324	9258	malignant fibrous histiocytoma amplified sequence 1 [Source:HGNC Symbol;Acc:HGNC:16982]	protein_coding	507.398	-0.619227	0.220549	-0.432703	0.263692	-2.80767	0.00499021	0.10291	488.213	765.194	644.584	338.006	464.967	460.139	390.684
KIF11	ENSG00000138160	3832	kinesin family member 11 [Source:HGNC Symbol;Acc:HGNC:6388]	protein_coding	980.45	-0.433214	0.154398	-0.321014	0.169622	-2.80583	0.00501879	0.103021	1114.7	1195.8	1137.9	943.751	904.472	734.59	831.943
ARL10	ENSG00000175414	285598	ADP ribosylation factor like GTPase 10 [Source:HGNC Symbol;Acc:HGNC:22042]	protein_coding	793.115	-0.520736	0.185571	-0.370892	0.212674	-2.80613	0.00501412	0.103021	798.895	1105.6	968.222	558.497	779.373	703.983	637.233
STARD9	ENSG00000159433	57519	StAR related lipid transfer domain containing 9 [Source:HGNC Symbol;Acc:HGNC:19162]	protein_coding	249.635	-0.971735	0.346209	-0.61058	0.482431	-2.80679	0.00500385	0.103021	397.74	285.129	353.713	134.475	307.764	111.209	157.412
RUNDC3A	ENSG00000108309	10900	RUN domain containing 3A [Source:HGNC Symbol;Acc:HGNC:16984]	protein_coding	25.75	-3.91351	1.39533	-0.0140255	0.130076	-2.80472	0.0050361	0.103063	46.0901	48.0064	0	1.21149	1.10706	1.02026	82.815
C5orf51	ENSG00000205765	285636	chromosome 5 open reading frame 51 [Source:HGNC Symbol;Acc:HGNC:27750]	protein_coding	578.864	-0.581812	0.207442	-0.405681	0.24421	-2.8047	0.00503633	0.103063	790.36	644.45	704.733	623.918	425.113	401.984	461.488
CCDC168	ENSG00000175820	643677	coiled-coil domain containing 168 [Source:HGNC Symbol;Acc:HGNC:26851]	protein_coding	6.97262	4.76356	1.69903	0.0207043	0.1314	2.80369	0.0050521	0.103227	0	0	0.897749	15.7494	6.64239	12.2432	13.2757
GALE	ENSG00000117308	2582	UDP-galactose-4-epimerase [Source:HGNC Symbol;Acc:HGNC:4116]	protein_coding	223.724	0.928844	0.331708	0.580459	0.479401	2.80018	0.00510739	0.103469	116.079	177.478	150.822	161.128	267.91	386.68	305.973
ZNF771	ENSG00000179965	51333	zinc finger protein 771 [Source:HGNC Symbol;Acc:HGNC:29653]	protein_coding	193.117	0.827487	0.295426	0.528212	0.406272	2.80099	0.00509457	0.103469	134.856	120.743	148.577	273.797	171.595	255.066	247.181
FCGRT	ENSG00000104870	2217	Fc fragment of IgG receptor and transporter [Source:HGNC Symbol;Acc:HGNC:3621]	protein_coding	541.513	0.540206	0.192815	0.379925	0.227198	2.80168	0.00508365	0.103469	423.346	411.692	457.852	666.32	507.036	697.861	626.486
HSBP1	ENSG00000230989	3281	heat shock factor binding protein 1 [Source:HGNC Symbol;Acc:HGNC:5203]	protein_coding	2293.28	0.462736	0.165205	0.338107	0.186687	2.80098	0.00509481	0.103469	2149.16	1585.67	1931.06	3287.99	2235.16	2230.3	2633.64
SNRPD2	ENSG00000125743	6633	small nuclear ribonucleoprotein D2 polypeptide [Source:HGNC Symbol;Acc:HGNC:11159]	protein_coding	5003.78	0.406405	0.145137	0.301964	0.159397	2.80014	0.00510808	0.103469	4931.64	3417.19	4326.25	6584.45	5168.88	4961.55	5636.47
IGBP1	ENSG00000089289	3476	immunoglobulin binding protein 1 [Source:HGNC Symbol;Acc:HGNC:5461]	protein_coding	1094.29	0.392326	0.140117	0.295448	0.152857	2.79998	0.00511052	0.103469	887.661	909.213	992.462	1235.72	1280.87	1158	1196.08
DKKL1	ENSG00000104901	27120	dickkopf like acrosomal protein 1 [Source:HGNC Symbol;Acc:HGNC:16528]	protein_coding	12.4149	4.70649	1.68128	0.0199766	0.131228	2.79934	0.00512069	0.103517	1.70704	1.45474	0	50.8826	1.10706	2.04053	29.7122
ARHGAP33	ENSG00000004777	115703	Rho GTPase activating protein 33 [Source:HGNC Symbol;Acc:HGNC:23085]	protein_coding	94.6541	-1.12159	0.401141	-0.688064	0.587315	-2.79601	0.00517373	0.104431	119.493	157.112	133.765	46.0366	59.7815	85.7022	60.6888
MAGI1	ENSG00000151276	9223	membrane associated guanylate kinase, WW and PDZ domain containing 1 [Source:HGNC Symbol;Acc:HGNC:946]	protein_coding	300.438	-0.84326	0.301833	-0.545223	0.399829	-2.7938	0.00520932	0.10499	423.346	372.414	407.578	136.898	210.342	348.93	203.56
TENT5C	ENSG00000183508	54855	terminal nucleotidyltransferase 5C [Source:HGNC Symbol;Acc:HGNC:24712]	protein_coding	66.4384	1.38592	0.496373	0.71671	1.37497	2.7921	0.00523671	0.105065	44.383	21.8211	38.1543	79.9584	67.5309	123.452	89.7689
ARMC2	ENSG00000118690	84071	armadillo repeat containing 2 [Source:HGNC Symbol;Acc:HGNC:23045]	protein_coding	25.4162	2.25847	0.808848	0.0521447	0.144133	2.79221	0.00523498	0.105065	8.5352	5.81896	10.3241	26.6528	64.2097	19.385	42.9879
MAP7	ENSG00000135525	9053	microtubule associated protein 7 [Source:HGNC Symbol;Acc:HGNC:6869]	protein_coding	389.939	-0.575499	0.206092	-0.400623	0.242298	-2.79243	0.00523131	0.105065	426.76	541.163	470.421	342.852	329.905	303.019	315.455
GDAP2	ENSG00000196505	54834	ganglioside induced differentiation associated protein 2 [Source:HGNC Symbol;Acc:HGNC:18010]	protein_coding	307.196	0.698865	0.25038	0.460851	0.322808	2.79122	0.00525099	0.105193	194.603	241.487	245.085	444.617	374.188	280.573	369.823
ILKAP	ENSG00000132323	80895	ILK associated serine/threonine phosphatase [Source:HGNC Symbol;Acc:HGNC:15566]	protein_coding	546.95	0.695189	0.249157	0.461676	0.31854	2.79016	0.00526821	0.10538	331.166	477.155	407.578	428.868	881.223	587.672	714.99
DDOST	ENSG00000244038	1650	dolichyl-diphosphooligosaccharide--protein glycosyltransferase non-catalytic subunit [Source:HGNC Symbol;Acc:HGNC:2728]	protein_coding	2617.22	0.402983	0.14451	0.3122	0.158123	2.78863	0.00529321	0.105721	2345.47	2062.82	2234.5	2345.45	2847.37	3463.8	3021.17
FAM83B	ENSG00000168143	222584	family with sequence similarity 83 member B [Source:HGNC Symbol;Acc:HGNC:21357]	protein_coding	8.20788	-4.38108	1.57137	-0.0234405	0.132015	-2.78807	0.00530238	0.105746	1.70704	30.5496	20.6482	2.42298	1.10706	1.02026	0
ZNF629	ENSG00000102870	23361	zinc finger protein 629 [Source:HGNC Symbol;Acc:HGNC:29008]	protein_coding	952.633	-0.557906	0.200185	-0.38778	0.234694	-2.78695	0.00532059	0.105951	872.298	1421.28	1198.49	645.724	831.405	962.109	737.116
STUB1	ENSG00000103266	10273	STIP1 homology and U-box containing protein 1 [Source:HGNC Symbol;Acc:HGNC:11427]	protein_coding	2295.52	0.50117	0.179864	0.351872	0.207938	2.78638	0.00533005	0.10598	2292.55	1438.74	1844.87	2330.91	2132.21	3269.95	2759.44
TIGAR	ENSG00000078237	57103	TP53 induced glycolysis regulatory phosphatase [Source:HGNC Symbol;Acc:HGNC:1185]	protein_coding	258.286	-0.686746	0.246673	-0.458497	0.305793	-2.78404	0.00536867	0.106589	343.115	324.407	320.496	202.319	173.809	242.823	201.032
EIF3E	ENSG00000104408	3646	eukaryotic translation initiation factor 3 subunit E [Source:HGNC Symbol;Acc:HGNC:3277]	protein_coding	6902.03	0.437444	0.157181	0.318732	0.175497	2.78306	0.0053848	0.106751	5850.03	5605.12	5783.75	9999.64	7542.43	5579.83	7953.4
EEF2KMT	ENSG00000118894	196483	eukaryotic elongation factor 2 lysine methyltransferase [Source:HGNC Symbol;Acc:HGNC:32221]	protein_coding	441.081	0.55977	0.201264	0.386981	0.240896	2.78127	0.00541466	0.107076	351.65	318.588	373.464	473.693	591.172	471.362	507.637
SETD5	ENSG00000168137	55209	SET domain containing 5 [Source:HGNC Symbol;Acc:HGNC:25566]	protein_coding	2077.64	-0.34373	0.123594	-0.262549	0.130239	-2.78111	0.00541729	0.107076	2133.8	2574.89	2375.89	1823.29	1939.58	1885.45	1810.55
TMEM121	ENSG00000184986	80757	transmembrane protein 121 [Source:HGNC Symbol;Acc:HGNC:20511]	protein_coding	190.563	0.943877	0.339647	0.570233	0.515642	2.77899	0.00545274	0.107617	165.583	78.556	131.969	282.277	263.481	164.263	247.813
IMPA1	ENSG00000133731	3612	inositol monophosphatase 1 [Source:HGNC Symbol;Acc:HGNC:6050]	protein_coding	408.092	0.571332	0.205729	0.391664	0.248335	2.77711	0.00548455	0.108084	295.318	317.133	347.429	522.152	494.858	413.207	466.545
COL25A1	ENSG00000188517	84570	collagen type XXV alpha 1 chain [Source:HGNC Symbol;Acc:HGNC:18603]	protein_coding	213.779	-0.911608	0.32869	-0.566513	0.457557	-2.77346	0.00554638	0.109142	198.017	378.233	296.706	132.052	224.734	124.472	142.239
H1-2	ENSG00000187837	3006	H1.2 linker histone, cluster member [Source:HGNC Symbol;Acc:HGNC:4716]	protein_coding	539.042	0.615311	0.221986	0.414456	0.274454	2.77184	0.00557402	0.109524	527.475	286.584	430.92	581.515	615.528	679.496	651.773
TAGLN2	ENSG00000158710	8407	transgelin 2 [Source:HGNC Symbol;Acc:HGNC:11554]	protein_coding	5477.1	0.314208	0.113384	0.249209	0.118739	2.77119	0.00558524	0.109582	5039.18	4467.51	4939.86	5497.74	5670.38	6690.89	6034.11
KDM2A	ENSG00000173120	22992	lysine demethylase 2A [Source:HGNC Symbol;Acc:HGNC:13606]	protein_coding	801.003	-0.513474	0.185352	-0.362089	0.212697	-2.77027	0.00560097	0.10973	805.723	1118.7	969.12	719.625	782.695	563.186	647.98
NDUFA12	ENSG00000184752	55967	NADH:ubiquinone oxidoreductase subunit A12 [Source:HGNC Symbol;Acc:HGNC:23987]	protein_coding	1216.78	0.431248	0.155948	0.314727	0.174102	2.76534	0.00568643	0.11124	1078.85	900.484	1070.12	1605.22	1214.45	1291.65	1356.65
ROR1	ENSG00000185483	4919	receptor tyrosine kinase like orphan receptor 1 [Source:HGNC Symbol;Acc:HGNC:10256]	protein_coding	110.071	-1.0158	0.367441	-0.617057	0.535285	-2.76452	0.00570072	0.111356	119.493	194.935	149.026	67.8435	77.4945	87.7427	73.9645
NDUFB6	ENSG00000165264	4712	NADH:ubiquinone oxidoreductase subunit B6 [Source:HGNC Symbol;Acc:HGNC:7701]	protein_coding	948.579	0.576993	0.208856	0.394438	0.253026	2.76264	0.00573359	0.111834	932.044	541.163	752.314	1379.89	1009.64	897.833	1127.17
PLXNA3	ENSG00000130827	55558	plexin A3 [Source:HGNC Symbol;Acc:HGNC:9101]	protein_coding	323.055	-0.64536	0.233726	-0.431243	0.286565	-2.76119	0.00575916	0.112169	331.166	485.883	401.294	239.875	271.231	281.593	250.341
EP300	ENSG00000100393	2033	E1A binding protein p300 [Source:HGNC Symbol;Acc:HGNC:3373]	protein_coding	924.384	-0.497719	0.180322	-0.35209	0.205679	-2.76016	0.00577732	0.112358	874.005	1332.54	1113.66	817.756	881.223	708.064	743.438
EXOSC5	ENSG00000077348	56915	exosome component 5 [Source:HGNC Symbol;Acc:HGNC:24662]	protein_coding	882.733	0.482381	0.174853	0.343758	0.201338	2.75878	0.00580172	0.112504	829.621	564.439	768.922	1073.38	1027.36	930.481	984.929
TRMT44	ENSG00000155275	152992	tRNA methyltransferase 44 homolog [Source:HGNC Symbol;Acc:HGNC:26653]	protein_coding	164.431	-0.895134	0.324466	-0.55596	0.449674	-2.75879	0.00580155	0.112504	215.087	235.668	218.153	158.705	80.8157	127.533	115.056
OCRL	ENSG00000122126	4952	OCRL inositol polyphosphate-5-phosphatase [Source:HGNC Symbol;Acc:HGNC:8108]	protein_coding	924.539	-0.419821	0.152293	-0.308413	0.166833	-2.75666	0.00583954	0.113073	1066.9	1098.33	1072.81	829.871	718.485	895.792	789.587
NEK3	ENSG00000136098	4752	NIMA related kinase 3 [Source:HGNC Symbol;Acc:HGNC:7746]	protein_coding	333.569	-0.648854	0.235421	-0.429312	0.2902	-2.75614	0.00584875	0.113087	447.245	401.508	411.169	336.794	261.267	215.276	261.721
MRPS34	ENSG00000074071	65993	mitochondrial ribosomal protein S34 [Source:HGNC Symbol;Acc:HGNC:16618]	protein_coding	3648.73	0.422771	0.153475	0.307976	0.172213	2.75466	0.00587533	0.11327	3350.92	2366.86	3472.04	4868.98	3731.91	4003.52	3746.9
PSMD14	ENSG00000115233	10213	proteasome 26S subunit, non-ATPase 14 [Source:HGNC Symbol;Acc:HGNC:16889]	protein_coding	1307.31	0.416059	0.151044	0.305231	0.167269	2.75455	0.00587729	0.11327	1065.19	1079.42	1153.16	1583.42	1609.67	1201.87	1458.43
CDK4	ENSG00000135446	1019	cyclin dependent kinase 4 [Source:HGNC Symbol;Acc:HGNC:1773]	protein_coding	3600.67	0.397187	0.144219	0.294752	0.157937	2.75407	0.005886	0.11327	3625.75	2398.87	3135.39	4379.54	3943.36	3673.97	4047.82
VAT1	ENSG00000108828	10493	vesicle amine transport 1 [Source:HGNC Symbol;Acc:HGNC:16919]	protein_coding	3728.19	0.361207	0.131186	0.274709	0.140641	2.7534	0.00589789	0.11327	3000.98	3402.64	3230.1	3404.29	4090.6	4721.78	4246.95
PFAS	ENSG00000178921	5198	phosphoribosylformylglycinamidine synthase [Source:HGNC Symbol;Acc:HGNC:8863]	protein_coding	539.408	-0.554975	0.201571	-0.381612	0.236908	-2.75325	0.0059007	0.11327	513.819	798.653	663.437	440.983	460.539	467.281	431.144
APC	ENSG00000134982	324	APC regulator of WNT signaling pathway [Source:HGNC Symbol;Acc:HGNC:583]	protein_coding	719.289	-0.493752	0.179369	-0.349026	0.204169	-2.75271	0.00591043	0.113293	725.492	996.497	859.595	692.973	605.564	563.186	591.716
C9orf16	ENSG00000171159	79095	chromosome 9 open reading frame 16 [Source:HGNC Symbol;Acc:HGNC:17823]	protein_coding	221.359	0.791677	0.287813	0.490322	0.40336	2.75066	0.00594751	0.113677	180.946	120.743	169.226	266.528	210.342	325.464	276.261
MAD2L1	ENSG00000164109	4085	mitotic arrest deficient 2 like 1 [Source:HGNC Symbol;Acc:HGNC:6763]	protein_coding	1967.81	0.434265	0.157851	0.315288	0.176565	2.7511	0.00593948	0.113677	1691.68	1540.57	1690.91	2674.97	2258.41	1691.6	2226.52
SELENOF	ENSG00000183291	9403	selenoprotein F [Source:HGNC Symbol;Acc:HGNC:17705]	protein_coding	3495.24	0.45203	0.164589	0.324059	0.185915	2.74642	0.00602491	0.114499	3216.06	2537.07	2921.72	5047.07	3758.48	2948.56	4037.7
PPIB	ENSG00000166794	5479	peptidylprolyl isomerase B [Source:HGNC Symbol;Acc:HGNC:9255]	protein_coding	7450.14	0.343263	0.124954	0.261175	0.133509	2.74711	0.00601224	0.114499	7022.76	5347.63	7045.53	9031.66	8203.35	7709.12	7790.93
ANKRD17	ENSG00000132466	26057	ankyrin repeat domain 17 [Source:HGNC Symbol;Acc:HGNC:23575]	protein_coding	1874.93	-0.328658	0.119657	-0.254143	0.125318	-2.74666	0.00602053	0.114499	2084.3	2164.65	2111.51	1711.84	1792.34	1599.77	1660.09
ZNF211	ENSG00000121417	10520	zinc finger protein 211 [Source:HGNC Symbol;Acc:HGNC:13003]	protein_coding	235.31	-0.695565	0.253244	-0.453696	0.319606	-2.74662	0.00602122	0.114499	344.822	269.127	288.626	192.627	199.272	169.364	183.331
TNFAIP8	ENSG00000145779	25816	TNF alpha induced protein 8 [Source:HGNC Symbol;Acc:HGNC:17260]	protein_coding	130.744	1.06813	0.389179	0.580149	0.746276	2.74457	0.00605912	0.114658	116.079	40.7327	86.1839	173.243	171.595	150.999	176.377
PIH1D1	ENSG00000104872	55011	PIH1 domain containing 1 [Source:HGNC Symbol;Acc:HGNC:26075]	protein_coding	1096.64	0.423976	0.154473	0.308926	0.171724	2.74465	0.00605748	0.114658	930.337	877.209	950.716	1069.75	1170.17	1430.41	1247.91
RPL38	ENSG00000172809	6169	ribosomal protein L38 [Source:HGNC Symbol;Acc:HGNC:10349]	protein_coding	13886.3	0.397544	0.144804	0.292183	0.160229	2.7454	0.00604376	0.114658	12913.8	9119.77	13337	18614.6	14724	14345.9	14149.3
MGST3	ENSG00000143198	4259	microsomal glutathione S-transferase 3 [Source:HGNC Symbol;Acc:HGNC:7064]	protein_coding	1025.03	0.589724	0.215015	0.393998	0.264166	2.74271	0.00609339	0.11498	1041.29	551.347	799.446	1204.22	1415.94	913.137	1249.81
BATF2	ENSG00000168062	116071	basic leucine zipper ATF-like transcription factor 2 [Source:HGNC Symbol;Acc:HGNC:25163]	protein_coding	28.6876	-1.82517	0.665355	-0.0764989	0.162554	-2.74315	0.00608523	0.11498	59.7464	42.1875	43.9897	13.3264	14.3918	13.2634	13.9079
CHID1	ENSG00000177830	66005	chitinase domain containing 1 [Source:HGNC Symbol;Acc:HGNC:28474]	protein_coding	1186.69	0.506446	0.184824	0.358572	0.215376	2.74015	0.00614114	0.115718	1160.79	736.099	979.444	1567.67	1093.78	1381.44	1387.62
ATP5F1C	ENSG00000165629	509	ATP synthase F1 subunit gamma [Source:HGNC Symbol;Acc:HGNC:833]	protein_coding	3249.09	0.413712	0.151023	0.302207	0.167046	2.7394	0.00615511	0.115817	2777.35	2628.72	2796.49	4441.32	3678.78	2745.53	3675.47
CLDN7	ENSG00000181885	1366	claudin 7 [Source:HGNC Symbol;Acc:HGNC:2049]	protein_coding	7.15977	4.92799	1.79932	0.017875	0.130758	2.73881	0.00616626	0.115863	1.70704	0	0	2.42298	14.3918	13.2634	18.3331
ZDHHC12	ENSG00000160446	84885	zinc finger DHHC-type palmitoyltransferase 12 [Source:HGNC Symbol;Acc:HGNC:19159]	protein_coding	372.838	0.608017	0.222189	0.401728	0.277266	2.73649	0.00620981	0.11595	332.873	222.575	307.928	434.925	427.327	449.937	434.304
SERPINI1	ENSG00000163536	5274	serpin family I member 1 [Source:HGNC Symbol;Acc:HGNC:8943]	protein_coding	83.2118	1.22381	0.447136	0.125957	0.231609	2.737	0.00620023	0.11595	52.9182	36.3685	53.8649	70.2664	149.454	102.026	117.585
FLNA	ENSG00000196924	2316	filamin A [Source:HGNC Symbol;Acc:HGNC:3754]	protein_coding	3078.47	-0.382794	0.139848	-0.289857	0.150975	-2.73722	0.00619614	0.11595	3002.68	4017.99	3617.93	2372.1	2985.75	2971.01	2581.8
BRD4	ENSG00000141867	23476	bromodomain containing 4 [Source:HGNC Symbol;Acc:HGNC:13575]	protein_coding	993.228	-0.5266	0.192453	-0.363595	0.22392	-2.73625	0.00621439	0.11595	990.083	1387.82	1224.98	639.667	1022.93	907.015	780.104
POMGNT2	ENSG00000144647	84892	protein O-linked mannose N-acetylglucosaminyltransferase 2 (beta 1,4-) [Source:HGNC Symbol;Acc:HGNC:25902]	protein_coding	619.624	-0.536085	0.195811	-0.368455	0.229163	-2.73776	0.00618587	0.11595	708.422	775.377	771.166	489.442	666.453	439.734	486.775
TMEM222	ENSG00000186501	84065	transmembrane protein 222 [Source:HGNC Symbol;Acc:HGNC:25363]	protein_coding	236.659	1.14975	0.420493	0.5895	1.03964	2.7343	0.00625133	0.116476	187.774	106.196	126.134	186.57	135.062	557.064	357.811
ME2	ENSG00000082212	4200	malic enzyme 2 [Source:HGNC Symbol;Acc:HGNC:6984]	protein_coding	670.144	0.537103	0.196482	0.366936	0.234393	2.7336	0.00626462	0.11656	621.363	418.965	562.44	841.986	821.442	647.868	776.943
HNRNPM	ENSG00000099783	4670	heterogeneous nuclear ribonucleoprotein M [Source:HGNC Symbol;Acc:HGNC:5046]	protein_coding	3003.79	-0.314616	0.115195	-0.247974	0.12014	-2.73117	0.00631095	0.117259	3391.89	3348.81	3399.33	2479.92	2992.4	2762.88	2651.34
PDE6D	ENSG00000156973	5147	phosphodiesterase 6D [Source:HGNC Symbol;Acc:HGNC:8788]	protein_coding	423.601	0.576204	0.211021	0.386345	0.258245	2.73056	0.00632276	0.117303	372.135	267.672	355.509	526.998	442.826	510.132	489.936
OLFML3	ENSG00000116774	56944	olfactomedin like 3 [Source:HGNC Symbol;Acc:HGNC:24956]	protein_coding	6.41225	5.8799	2.15371	0.0124467	0.129893	2.73013	0.00633095	0.117303	0	0	0	21.8068	6.64239	0	16.4366
TBC1D9	ENSG00000109436	23158	TBC1 domain family member 9 [Source:HGNC Symbol;Acc:HGNC:21710]	protein_coding	337.898	-0.653329	0.239379	-0.427218	0.298109	-2.72926	0.00634762	0.117449	327.752	523.707	425.982	276.22	302.229	248.945	260.456
POLR1A	ENSG00000068654	25885	RNA polymerase I subunit A [Source:HGNC Symbol;Acc:HGNC:17264]	protein_coding	782.902	-0.434637	0.159296	-0.313831	0.176216	-2.72849	0.00636251	0.117561	863.762	979.04	912.562	621.495	701.879	739.692	661.887
PRSS23	ENSG00000150687	11098	serine protease 23 [Source:HGNC Symbol;Acc:HGNC:14370]	protein_coding	337.788	0.707491	0.259541	0.447825	0.346048	2.72593	0.00641202	0.118311	172.411	314.224	259.001	468.847	332.119	396.883	421.029
TPI1	ENSG00000111669	7167	triosephosphate isomerase 1 [Source:HGNC Symbol;Acc:HGNC:12009]	protein_coding	15498.1	0.321898	0.118137	0.252424	0.125193	2.72479	0.00643419	0.118393	14474	11320.8	14982.1	18247.5	16366.8	17193.5	15901.7
SDSL	ENSG00000139410	113675	serine dehydratase like [Source:HGNC Symbol;Acc:HGNC:30404]	protein_coding	170.201	1.35788	0.498274	0.0999499	0.188995	2.72516	0.00642704	0.118393	32.4338	160.021	77.2064	392.523	120.67	136.715	271.835
STARD10	ENSG00000214530	10809	StAR related lipid transfer domain containing 10 [Source:HGNC Symbol;Acc:HGNC:10666]	protein_coding	303.903	0.690796	0.253839	0.436548	0.337194	2.72139	0.00650085	0.11929	278.248	158.567	240.597	371.928	373.081	340.768	364.133
KLHL17	ENSG00000187961	339451	kelch like family member 17 [Source:HGNC Symbol;Acc:HGNC:24023]	protein_coding	160.239	-1.22552	0.450308	-0.597744	1.2413	-2.72151	0.0064984	0.11929	145.098	308.405	257.205	65.4205	58.6744	204.053	82.815
NME1	ENSG00000239672	4830	NME/NM23 nucleoside diphosphate kinase 1 [Source:HGNC Symbol;Acc:HGNC:7849]	protein_coding	3173.34	0.409234	0.150418	0.297499	0.166748	2.72065	0.00651532	0.119391	2997.56	2171.93	2862.02	4220.83	3496.11	3027.12	3437.77
AP1G2	ENSG00000213983	8906	adaptor related protein complex 1 subunit gamma 2 [Source:HGNC Symbol;Acc:HGNC:556]	protein_coding	792.131	-0.560056	0.205989	-0.377817	0.244805	-2.71887	0.00655054	0.119871	757.926	1160.88	986.177	776.565	738.412	506.051	618.9
NHLH2	ENSG00000177551	4808	nescient helix-loop-helix 2 [Source:HGNC Symbol;Acc:HGNC:7818]	protein_coding	10.6796	4.37779	1.61172	0.0212686	0.131484	2.71621	0.0066033	0.120671	1.70704	1.45474	0	1.21149	9.96358	27.5471	32.8731
YWHAE	ENSG00000108953	7531	tyrosine 3-monooxygenase/tryptophan 5-monooxygenase activation protein epsilon [Source:HGNC Symbol;Acc:HGNC:12851]	protein_coding	16307.5	0.298853	0.110089	0.228254	0.114861	2.71466	0.00663433	0.121072	15168.8	12467.1	15685.5	18673.9	18323	16971.1	16863.3
MSMO1	ENSG00000052802	6307	methylsterol monooxygenase 1 [Source:HGNC Symbol;Acc:HGNC:10545]	protein_coding	329.332	0.624168	0.230057	0.406936	0.291415	2.7131	0.00666573	0.121479	198.017	288.039	269.774	405.849	367.545	386.68	389.42
AMER1	ENSG00000184675	139285	APC membrane recruitment protein 1 [Source:HGNC Symbol;Acc:HGNC:26837]	protein_coding	319.93	-0.730681	0.269431	-0.457331	0.354925	-2.71194	0.0066891	0.121738	302.146	516.433	420.147	188.993	276.766	303.019	232.008
POLR1D	ENSG00000186184	51082	RNA polymerase I and III subunit D [Source:HGNC Symbol;Acc:HGNC:20422]	protein_coding	2314.52	0.355724	0.131204	0.264159	0.141263	2.71122	0.00670357	0.121835	2104.78	1720.96	2172.1	2798.54	2455.47	2505.77	2443.99
COL16A1	ENSG00000084636	1307	collagen type XVI alpha 1 chain [Source:HGNC Symbol;Acc:HGNC:2193]	protein_coding	7.45713	4.96222	1.83133	0.016865	0.130564	2.70963	0.0067358	0.122254	1.70704	0	0	18.1724	11.0706	1.02026	20.2296
TUBA1C	ENSG00000167553	84790	tubulin alpha 1c [Source:HGNC Symbol;Acc:HGNC:20768]	protein_coding	7160.34	0.285805	0.105546	0.225528	0.109508	2.70787	0.00677157	0.122631	6174.36	6012.44	6939.6	7387.67	8172.35	8059.07	7376.85
CYGB	ENSG00000161544	114757	cytoglobin [Source:HGNC Symbol;Acc:HGNC:16505]	protein_coding	8.44432	5.14858	1.90146	0.0155438	0.13034	2.70771	0.00677498	0.122631	1.70704	0	0	0	25.4625	9.18238	22.7583
QSOX2	ENSG00000165661	169714	quiescin sulfhydryl oxidase 2 [Source:HGNC Symbol;Acc:HGNC:30249]	protein_coding	614.634	-0.559057	0.206582	-0.374797	0.245988	-2.70622	0.00680544	0.123015	619.656	872.844	761.74	401.003	586.744	577.47	482.982
EGR3	ENSG00000179388	1960	early growth response 3 [Source:HGNC Symbol;Acc:HGNC:3240]	protein_coding	9.158	5.25805	1.94381	0.0146755	0.1302	2.70503	0.00682991	0.12329	1.70704	0	0	2.42298	0	34.689	25.287
C3orf80	ENSG00000180044	401097	chromosome 3 open reading frame 80 [Source:HGNC Symbol;Acc:HGNC:40048]	protein_coding	44.5441	-1.73896	0.643111	-0.0764167	0.162229	-2.70398	0.00685142	0.123511	61.4534	85.8297	74.0643	39.9792	6.64239	25.5066	18.3331
FOLH1	ENSG00000086205	2346	folate hydrolase 1 [Source:HGNC Symbol;Acc:HGNC:3788]	protein_coding	12.4609	-4.23637	1.56927	-0.020915	0.131374	-2.69958	0.00694266	0.124987	0	46.5517	32.7678	4.84596	0	3.06079	0
TRAPPC2L	ENSG00000167515	51693	trafficking protein particle complex 2 like [Source:HGNC Symbol;Acc:HGNC:30887]	protein_coding	637.543	0.724752	0.268646	0.445101	0.370026	2.6978	0.00697997	0.12532	648.675	290.948	456.954	1033.4	654.275	561.145	817.403
IL10RB	ENSG00000243646	3588	interleukin 10 receptor subunit beta [Source:HGNC Symbol;Acc:HGNC:5965]	protein_coding	23.4351	-2.23459	0.828252	-0.0543155	0.145311	-2.69796	0.00697648	0.12532	52.9182	32.0043	42.1942	7.26894	3.32119	19.385	6.95393
SCPEP1	ENSG00000121064	59342	serine carboxypeptidase 1 [Source:HGNC Symbol;Acc:HGNC:29507]	protein_coding	872.7	0.562084	0.208413	0.374663	0.253705	2.69697	0.0069973	0.125462	672.574	704.094	685.88	673.589	1312.98	987.616	1072.17
HSD17B8	ENSG00000204228	7923	hydroxysteroid 17-beta dehydrogenase 8 [Source:HGNC Symbol;Acc:HGNC:3554]	protein_coding	121.343	1.00558	0.373315	0.50953	0.813013	2.69365	0.00706748	0.12638	49.5042	97.4676	84.8373	162.34	122.884	172.425	159.94
LTB4R	ENSG00000213903	1241	leukotriene B4 receptor [Source:HGNC Symbol;Acc:HGNC:6713]	protein_coding	190.054	-0.933279	0.346449	-0.529393	0.541863	-2.69384	0.00706345	0.12638	227.036	290.948	262.592	213.222	80.8157	130.594	125.171
PFN1	ENSG00000108518	5216	profilin 1 [Source:HGNC Symbol;Acc:HGNC:8881]	protein_coding	8519.49	0.358847	0.133276	0.267017	0.143217	2.6925	0.00709175	0.126644	8538.61	5848.06	7653.31	9957.24	8457.97	9859.84	9321.42
MDH1	ENSG00000014641	4190	malate dehydrogenase 1 [Source:HGNC Symbol;Acc:HGNC:6970]	protein_coding	2153.66	0.366654	0.13623	0.272487	0.147056	2.69144	0.00711443	0.126879	1643.88	2003.18	1903.23	2579.26	2500.86	2043.59	2401.63
ELAPOR1	ENSG00000116299	57535	endosome-lysosome associated apoptosis and autophagy regulator 1 [Source:HGNC Symbol;Acc:HGNC:29618]	protein_coding	26.3043	-2.21861	0.825236	-0.0539805	0.145081	-2.68846	0.00717826	0.127846	13.6563	81.4655	46.683	16.9609	5.53532	12.2432	7.5861
ADH5	ENSG00000197894	128	alcohol dehydrogenase 5 (class III), chi polypeptide [Source:HGNC Symbol;Acc:HGNC:253]	protein_coding	1550.18	0.361399	0.134517	0.268705	0.14499	2.68665	0.00721719	0.128368	1302.47	1294.72	1408.57	1596.74	1930.72	1626.3	1691.7
DOCK5	ENSG00000147459	80005	dedicator of cytokinesis 5 [Source:HGNC Symbol;Acc:HGNC:23476]	protein_coding	303.234	-0.608212	0.226551	-0.395245	0.278501	-2.68466	0.00726037	0.128963	337.994	424.784	367.628	231.395	255.732	264.249	240.859
CCNL2	ENSG00000221978	81669	cyclin L2 [Source:HGNC Symbol;Acc:HGNC:20570]	protein_coding	1062.56	-0.399795	0.148952	-0.290303	0.162216	-2.68406	0.0072734	0.129023	1176.15	1291.81	1226.77	834.717	1052.82	947.826	907.804
EXTL1	ENSG00000158008	2134	exostosin like glycosyltransferase 1 [Source:HGNC Symbol;Acc:HGNC:3515]	protein_coding	6.02557	5.79334	2.16033	0.012264	0.129866	2.68169	0.00732524	0.12977	0	0	0	0	11.0706	15.304	15.8044
SNTA1	ENSG00000101400	6640	syntrophin alpha 1 [Source:HGNC Symbol;Acc:HGNC:11167]	protein_coding	670.662	0.485709	0.181212	0.332978	0.211236	2.68033	0.00735497	0.129951	614.534	445.151	581.741	832.294	745.054	717.246	758.61
NHP2	ENSG00000145912	55651	NHP2 ribonucleoprotein [Source:HGNC Symbol;Acc:HGNC:14377]	protein_coding	5131.81	0.371635	0.138651	0.272914	0.150879	2.68037	0.00735405	0.129951	5013.58	3449.19	4744.6	6331.25	5554.14	5371.69	5458.2
DGCR6L	ENSG00000128185	85359	DiGeorge syndrome critical region gene 6 like [Source:HGNC Symbol;Acc:HGNC:18551]	protein_coding	1087.96	0.562252	0.209848	0.369297	0.257347	2.67933	0.00737699	0.130167	1087.38	619.719	863.635	1610.07	1072.75	1052.91	1309.23
SLC41A3	ENSG00000114544	54946	solute carrier family 41 member 3 [Source:HGNC Symbol;Acc:HGNC:31046]	protein_coding	757.049	0.473379	0.176731	0.325621	0.204941	2.67853	0.00739457	0.130305	689.644	497.521	675.556	913.464	808.157	885.59	829.414
UTP25	ENSG00000117597	27042	UTP25 small subunit processor component [Source:HGNC Symbol;Acc:HGNC:28440]	protein_coding	567.585	-0.509844	0.190384	-0.346283	0.22105	-2.67797	0.007407	0.130351	648.675	717.187	683.636	392.523	554.639	511.153	465.281
NOP10	ENSG00000182117	55505	NOP10 ribonucleoprotein [Source:HGNC Symbol;Acc:HGNC:14378]	protein_coding	1735.31	0.524405	0.195881	0.348869	0.234138	2.67716	0.00742498	0.130444	1765.08	1019.77	1384.78	2311.52	2142.17	1452.86	2071.01
SLC15A1	ENSG00000088386	6564	solute carrier family 15 member 1 [Source:HGNC Symbol;Acc:HGNC:10920]	protein_coding	7.08032	-5.12053	1.91289	-0.0187032	0.130973	-2.67685	0.00743185	0.130444	0	33.459	14.364	0	1.10706	0	0.632175
PLIN3	ENSG00000105355	10226	perilipin 3 [Source:HGNC Symbol;Acc:HGNC:16893]	protein_coding	558.335	0.574519	0.214883	0.379991	0.264944	2.67363	0.00750353	0.130448	382.377	484.429	445.732	470.058	663.132	780.502	682.117
DYNLT1	ENSG00000146425	6993	dynein light chain Tctex-type 1 [Source:HGNC Symbol;Acc:HGNC:11697]	protein_coding	1443.71	0.491758	0.183768	0.335959	0.214764	2.67596	0.00745145	0.130448	1341.73	986.314	1192.66	2107.99	1537.71	1257.99	1681.59
TALDO1	ENSG00000177156	6888	transaldolase 1 [Source:HGNC Symbol;Acc:HGNC:11559]	protein_coding	2127.96	0.367211	0.137271	0.267522	0.149596	2.67507	0.00747135	0.130448	1824.83	1591.49	2073.8	2250.95	2597.17	2393.54	2163.94
SAMD12	ENSG00000177570	401474	sterile alpha motif domain containing 12 [Source:HGNC Symbol;Acc:HGNC:31750]	protein_coding	19.2384	2.97763	1.11383	0.0300586	0.133885	2.67332	0.00751042	0.130448	1.70704	11.6379	0.448875	48.4596	22.1413	9.18238	41.0914
FGF5	ENSG00000138675	2250	fibroblast growth factor 5 [Source:HGNC Symbol;Acc:HGNC:3683]	protein_coding	14.054	3.9915	1.49195	0.0212646	0.131458	2.67536	0.00746494	0.130448	1.70704	2.90948	0	8.48043	34.319	1.02026	49.9418
SPINK5	ENSG00000133710	11005	serine peptidase inhibitor Kazal type 5 [Source:HGNC Symbol;Acc:HGNC:15464]	protein_coding	50.5078	6.06661	2.2693	0.00913345	0.129496	2.67334	0.00750996	0.130448	3.41408	1.45474	0	214.434	1.10706	1.02026	132.125
LAMC1	ENSG00000135862	3915	laminin subunit gamma 1 [Source:HGNC Symbol;Acc:HGNC:6492]	protein_coding	1870.59	-0.41334	0.154597	-0.293797	0.169888	-2.67367	0.00750273	0.130448	1956.27	2366.86	2209.81	1435.62	2051.39	1517.13	1557.05
SLC35E3	ENSG00000175782	55508	solute carrier family 35 member E3 [Source:HGNC Symbol;Acc:HGNC:20864]	protein_coding	290.717	-0.858199	0.321002	-0.485578	0.488861	-2.6735	0.00750644	0.130448	360.185	402.963	405.783	140.533	366.438	166.303	192.813
BCOR	ENSG00000183337	54880	BCL6 corepressor [Source:HGNC Symbol;Acc:HGNC:20893]	protein_coding	1129.53	-0.391388	0.146488	-0.277551	0.158634	-2.67181	0.00754433	0.130653	1186.39	1418.37	1311.61	919.521	1015.18	1089.64	965.964
ITPR3	ENSG00000096433	3710	inositol 1,4,5-trisphosphate receptor type 3 [Source:HGNC Symbol;Acc:HGNC:6182]	protein_coding	650.455	-0.567342	0.21237	-0.371158	0.256432	-2.67149	0.00755161	0.130653	643.554	933.943	814.258	408.272	609.993	638.686	504.476
TRIM9	ENSG00000100505	114088	tripartite motif containing 9 [Source:HGNC Symbol;Acc:HGNC:16288]	protein_coding	157.275	-0.833036	0.311789	-0.484366	0.453919	-2.67179	0.00754473	0.130653	165.583	258.944	203.789	129.629	117.349	111.209	114.424
VTA1	ENSG00000009844	51534	vesicle trafficking 1 [Source:HGNC Symbol;Acc:HGNC:20954]	protein_coding	1421.72	0.40934	0.153365	0.293821	0.170347	2.66906	0.0076064	0.13143	1164.2	1169.61	1262.68	1915.37	1525.53	1343.69	1570.96
SLC25A17	ENSG00000100372	10478	solute carrier family 25 member 17 [Source:HGNC Symbol;Acc:HGNC:10987]	protein_coding	903.802	0.394781	0.147966	0.281268	0.162808	2.66805	0.00762937	0.131645	754.512	728.825	818.298	992.211	1061.67	980.474	990.619
LAMB2	ENSG00000172037	3913	laminin subunit beta 2 [Source:HGNC Symbol;Acc:HGNC:6487]	protein_coding	560.931	-0.577776	0.216622	-0.375784	0.263365	-2.66721	0.00764849	0.131645	503.577	868.48	696.204	456.732	533.605	433.612	434.304
PGGHG	ENSG00000142102	80162	protein-glucosylgalactosylhydroxylysine glucosidase [Source:HGNC Symbol;Acc:HGNC:26210]	protein_coding	275.922	-0.814287	0.305274	-0.470923	0.444897	-2.6674	0.00764411	0.131645	244.107	478.61	371.668	277.431	221.413	147.938	190.285
DECR2	ENSG00000242612	26063	2,4-dienoyl-CoA reductase 2 [Source:HGNC Symbol;Acc:HGNC:2754]	protein_coding	165.53	0.806676	0.302563	0.450613	0.476986	2.66614	0.00767279	0.131893	114.372	104.741	129.725	224.126	220.306	166.303	199.135
ILF3	ENSG00000129351	3609	interleukin enhancer binding factor 3 [Source:HGNC Symbol;Acc:HGNC:6038]	protein_coding	5513.18	-0.321724	0.120758	-0.245006	0.126373	-2.6642	0.00771722	0.132486	5433.51	6888.2	6330.48	4540.67	5310.59	5319.66	4769.13
DNPH1	ENSG00000112667	10591	2'-deoxynucleoside 5'-phosphate N-hydrolase 1 [Source:HGNC Symbol;Acc:HGNC:21218]	protein_coding	1241.12	0.437285	0.16422	0.318291	0.185098	2.66281	0.00774916	0.132692	1223.95	804.471	1074.16	1488.92	1330.69	1369.19	1396.48
TRIP13	ENSG00000071539	9319	thyroid hormone receptor interactor 13 [Source:HGNC Symbol;Acc:HGNC:12307]	protein_coding	1149.58	0.407763	0.153115	0.292532	0.170078	2.66311	0.00774214	0.132692	1065.19	816.109	1030.17	1401.69	1227.73	1243.7	1262.45
TP53I13	ENSG00000167543	90313	tumor protein p53 inducible protein 13 [Source:HGNC Symbol;Acc:HGNC:25102]	protein_coding	424.263	0.661733	0.248782	0.400941	0.334784	2.65989	0.00781652	0.133673	418.225	210.937	329.025	570.612	487.108	438.714	515.223
JOSD2	ENSG00000161677	126119	Josephin domain containing 2 [Source:HGNC Symbol;Acc:HGNC:28853]	protein_coding	196.281	0.818596	0.308128	0.447235	0.50262	2.65667	0.00789155	0.13446	167.29	97.4676	146.782	283.489	249.09	187.729	242.123
SAP18	ENSG00000150459	10284	Sin3A associated protein 18 [Source:HGNC Symbol;Acc:HGNC:10530]	protein_coding	1964.19	0.418314	0.157461	0.296267	0.175859	2.65662	0.00789277	0.13446	1942.61	1310.72	1697.19	2532.01	2042.53	2007.88	2216.41
QRICH1	ENSG00000198218	54870	glutamine rich 1 [Source:HGNC Symbol;Acc:HGNC:24713]	protein_coding	1056.79	-0.433215	0.16302	-0.314251	0.181666	-2.65743	0.00787399	0.13446	1005.45	1457.65	1253.26	926.79	964.253	907.015	883.149
TLE3	ENSG00000140332	7090	TLE family member 3, transcriptional corepressor [Source:HGNC Symbol;Acc:HGNC:11839]	protein_coding	706.063	-0.543543	0.204797	-0.356894	0.244496	-2.65406	0.00795308	0.135314	658.917	1038.68	878.447	494.288	613.314	705.003	553.785
PRRC2A	ENSG00000204469	7916	proline rich coiled-coil 2A [Source:HGNC Symbol;Acc:HGNC:13918]	protein_coding	2856.56	-0.403101	0.151961	-0.288256	0.166391	-2.65267	0.00798579	0.135697	2901.97	3652.85	3384.07	2021.98	2641.46	3039.37	2354.22
SH3BGRL	ENSG00000131171	6451	SH3 domain binding glutamate rich protein like [Source:HGNC Symbol;Acc:HGNC:10823]	protein_coding	963.287	0.573121	0.216252	0.367593	0.26962	2.65025	0.00804316	0.136498	925.216	578.987	760.393	1501.04	907.793	907.015	1162.57
MRPL36	ENSG00000171421	64979	mitochondrial ribosomal protein L36 [Source:HGNC Symbol;Acc:HGNC:14490]	protein_coding	606.095	0.572729	0.216266	0.366299	0.270164	2.64826	0.00809084	0.137132	568.444	365.14	491.966	873.485	648.74	580.531	714.358
AREG	ENSG00000109321	374	amphiregulin [Source:HGNC Symbol;Acc:HGNC:651]	protein_coding	5.78965	4.91097	1.85541	0.0170579	0.130632	2.64683	0.00812493	0.137434	0	0	0.448875	12.1149	3.32119	13.2634	11.3792
BPTF	ENSG00000171634	2186	bromodomain PHD finger transcription factor [Source:HGNC Symbol;Acc:HGNC:3581]	protein_coding	1633.94	-0.366337	0.138415	-0.268574	0.148242	-2.64665	0.00812924	0.137434	1664.36	2073.01	1877.19	1457.42	1608.56	1349.81	1407.22
MRPS26	ENSG00000125901	64949	mitochondrial ribosomal protein S26 [Source:HGNC Symbol;Acc:HGNC:14045]	protein_coding	1695.01	0.401741	0.151917	0.28306	0.167964	2.64448	0.00818159	0.138143	1666.07	1150.7	1487.12	2065.59	1833.3	1770.16	1892.1
ATP8B1	ENSG00000081923	5205	ATPase phospholipid transporting 8B1 [Source:HGNC Symbol;Acc:HGNC:3706]	protein_coding	7.41158	4.98032	1.88436	0.0159948	0.130411	2.64297	0.00821812	0.138585	1.70704	0	0	26.6528	1.10706	4.08106	18.3331
RAD54L2	ENSG00000164080	23132	RAD54 like 2 [Source:HGNC Symbol;Acc:HGNC:29123]	protein_coding	814.005	-0.432513	0.163791	-0.302869	0.182348	-2.64063	0.0082751	0.139193	874.005	1034.32	953.858	623.918	757.232	771.32	683.381
PRKCA	ENSG00000154229	5578	protein kinase C alpha [Source:HGNC Symbol;Acc:HGNC:9393]	protein_coding	315.326	-0.664865	0.251762	-0.405759	0.328422	-2.64085	0.00826992	0.139193	375.549	423.329	397.703	258.047	325.477	185.688	241.491
PUS10	ENSG00000162927	150962	pseudouridine synthase 10 [Source:HGNC Symbol;Acc:HGNC:26505]	protein_coding	74.3953	1.21736	0.461179	0.110646	0.202974	2.63967	0.00829857	0.139236	27.3126	50.9159	49.8251	88.4388	125.098	75.4996	103.677
FRAS1	ENSG00000138759	80144	Fraser extracellular matrix complex subunit 1 [Source:HGNC Symbol;Acc:HGNC:19185]	protein_coding	413.116	-0.698749	0.264701	-0.416988	0.356319	-2.63977	0.00829624	0.139236	658.917	392.78	532.365	314.988	450.575	238.742	303.444
DYNC2H1	ENSG00000187240	79659	dynein cytoplasmic 2 heavy chain 1 [Source:HGNC Symbol;Acc:HGNC:2962]	protein_coding	1057.04	-0.468263	0.177487	-0.319293	0.202106	-2.6383	0.00833233	0.139627	1171.03	1323.81	1267.17	984.942	1093.78	688.679	869.873
ZNF587	ENSG00000198466	84914	zinc finger protein 587 [Source:HGNC Symbol;Acc:HGNC:30955]	protein_coding	392.005	-0.65027	0.24654	-0.398555	0.318953	-2.63758	0.00835003	0.139748	510.405	471.336	499.597	306.507	225.841	432.592	297.755
COX5B	ENSG00000135940	1329	cytochrome c oxidase subunit 5B [Source:HGNC Symbol;Acc:HGNC:2269]	protein_coding	3425.49	0.448584	0.170228	0.307657	0.197211	2.6352	0.00840888	0.140556	3234.84	1994.45	3304.17	4586.7	3719.74	3699.48	3439.03
TEPSIN	ENSG00000167302	146705	TEPSIN adaptor related protein complex 4 accessory protein [Source:HGNC Symbol;Acc:HGNC:26458]	protein_coding	263.27	-0.6225	0.236318	-0.388275	0.298436	-2.63416	0.00843462	0.14081	324.338	341.864	320.496	208.376	239.126	196.911	211.779
PTRHD1	ENSG00000184924	391356	peptidyl-tRNA hydrolase domain containing 1 [Source:HGNC Symbol;Acc:HGNC:33782]	protein_coding	563.118	0.588857	0.224008	0.367448	0.285468	2.62874	0.0085703	0.142309	486.506	375.323	452.466	814.122	687.487	457.079	668.841
RPS24	ENSG00000138326	6229	ribosomal protein S24 [Source:HGNC Symbol;Acc:HGNC:10411]	protein_coding	14607.8	0.420266	0.159805	0.308489	0.178527	2.62986	0.00854199	0.142309	11479.8	13201.8	12074.7	22037	13649	12757.4	17054.8
NARF	ENSG00000141562	26502	nuclear prelamin A recognition factor [Source:HGNC Symbol;Acc:HGNC:29916]	protein_coding	1340.75	0.348133	0.132414	0.254446	0.141844	2.62912	0.00856062	0.142309	1167.62	1079.42	1238	1509.52	1522.21	1420.21	1448.31
TBC1D3C	ENSG00000278299	414060	TBC1 domain family member 3C [Source:HGNC Symbol;Acc:HGNC:24889]	protein_coding	57.0085	-1.71127	0.65106	-0.0712561	0.157337	-2.62844	0.00857785	0.142309	133.149	50.9159	96.9569	15.7494	67.5309	13.2634	21.494
CRTC1	ENSG00000105662	23373	CREB regulated transcription coactivator 1 [Source:HGNC Symbol;Acc:HGNC:16062]	protein_coding	191.576	-0.759113	0.288711	-0.434494	0.412361	-2.62932	0.00855566	0.142309	228.743	276.401	243.739	127.206	133.955	188.749	142.239
GGH	ENSG00000137563	8836	gamma-glutamyl hydrolase [Source:HGNC Symbol;Acc:HGNC:4248]	protein_coding	807.178	0.52748	0.201295	0.343232	0.244049	2.62043	0.00878183	0.144842	703.301	568.804	665.232	1177.57	914.435	676.435	944.47
NUDT5	ENSG00000165609	11164	nudix hydrolase 5 [Source:HGNC Symbol;Acc:HGNC:8052]	protein_coding	2563	0.330462	0.126078	0.247358	0.133628	2.62108	0.00876507	0.144842	2340.35	2042.46	2330.56	3020.25	2465.43	2941.42	2800.54
TEX22	ENSG00000226174	647310	testis expressed 22 [Source:HGNC Symbol;Acc:HGNC:40026]	protein_coding	10.3284	4.33941	1.65607	0.0197106	0.131127	2.62031	0.00878491	0.144842	1.70704	1.45474	0	6.05745	1.10706	31.6282	30.3444
TOE1	ENSG00000132773	114034	target of EGR1, exonuclease [Source:HGNC Symbol;Acc:HGNC:15954]	protein_coding	348.1	-0.562217	0.21456	-0.360577	0.260392	-2.62033	0.00878455	0.144842	484.799	379.687	415.209	304.084	290.051	276.492	286.375
ABCC1	ENSG00000103222	4363	ATP binding cassette subfamily C member 1 [Source:HGNC Symbol;Acc:HGNC:51]	protein_coding	588.928	-0.676197	0.258013	-0.404088	0.34541	-2.62078	0.00877281	0.144842	566.737	896.12	777.002	328.314	702.986	431.572	419.764
SH2D2A	ENSG00000027869	9047	SH2 domain containing 2A [Source:HGNC Symbol;Acc:HGNC:10821]	protein_coding	56.7233	1.49958	0.572442	0.07791	0.163298	2.61961	0.00880293	0.144892	10.2422	43.6422	29.6257	66.632	58.6744	101.006	87.2402
PLCG1	ENSG00000124181	5335	phospholipase C gamma 1 [Source:HGNC Symbol;Acc:HGNC:9065]	protein_coding	1190.47	-0.386449	0.147536	-0.276661	0.16003	-2.61935	0.00880969	0.144892	1302.47	1437.28	1380.74	925.579	1196.74	1073.32	1017.17
STARD3NL	ENSG00000010270	83930	STARD3 N-terminal like [Source:HGNC Symbol;Acc:HGNC:19169]	protein_coding	841.069	0.485546	0.185515	0.322535	0.218096	2.61728	0.00886328	0.145594	723.785	619.719	713.71	1167.88	957.611	740.712	964.067
NXT2	ENSG00000101888	55916	nuclear transport factor 2 like export factor 2 [Source:HGNC Symbol;Acc:HGNC:18151]	protein_coding	279.662	0.948956	0.363255	0.19577	0.456943	2.61237	0.00899177	0.147523	192.896	180.388	175.51	614.226	201.486	208.134	384.995
SDF2L1	ENSG00000128228	23753	stromal cell derived factor 2 like 1 [Source:HGNC Symbol;Acc:HGNC:10676]	protein_coding	833.086	0.594872	0.227851	0.366223	0.293397	2.61079	0.00903322	0.147883	874.005	420.42	645.033	1167.88	861.296	845.799	1017.17
NFU1	ENSG00000169599	27247	NFU1 iron-sulfur cluster scaffold [Source:HGNC Symbol;Acc:HGNC:16287]	protein_coding	645.821	0.551848	0.211427	0.348516	0.262555	2.61011	0.00905129	0.147883	597.464	408.782	526.53	947.386	669.774	617.26	753.553
UTP3	ENSG00000132467	57050	UTP3 small subunit processome component [Source:HGNC Symbol;Acc:HGNC:24477]	protein_coding	446.175	-0.497883	0.19077	-0.328695	0.222105	-2.60985	0.00905812	0.147883	554.788	523.707	526.979	344.063	410.721	388.721	374.248
ZNF33A	ENSG00000189180	7581	zinc finger protein 33A [Source:HGNC Symbol;Acc:HGNC:13096]	protein_coding	320.969	-0.573112	0.21957	-0.361735	0.269503	-2.61016	0.00905001	0.147883	411.397	386.961	385.583	272.585	234.698	293.836	261.721
MRPL11	ENSG00000174547	65003	mitochondrial ribosomal protein L11 [Source:HGNC Symbol;Acc:HGNC:14042]	protein_coding	1944.28	0.432793	0.165954	0.299604	0.187854	2.60791	0.00910975	0.148271	1969.92	1246.71	1651.86	2404.81	2276.12	1841.58	2218.94
PQBP1	ENSG00000102103	10084	polyglutamine binding protein 1 [Source:HGNC Symbol;Acc:HGNC:9330]	protein_coding	1088.58	0.440056	0.168729	0.297003	0.193413	2.60806	0.0091056	0.148271	1007.15	701.185	1010.87	1291.45	1169.06	1291.65	1148.66
	ENSG00000261732		novel protein	protein_coding	6.82432	4.87028	1.86795	0.0161398	0.130428	2.60728	0.00912641	0.148271	1.70704	0	0	1.21149	11.0706	17.3445	16.4366
URB1	ENSG00000142207	9875	URB1 ribosome biogenesis homolog [Source:HGNC Symbol;Acc:HGNC:17344]	protein_coding	668.307	-0.557087	0.213658	-0.35514	0.260194	-2.60738	0.00912389	0.148271	658.917	960.129	828.622	440.983	725.127	547.882	516.487
UQCR10	ENSG00000184076	29796	ubiquinol-cytochrome c reductase, complex III subunit X [Source:HGNC Symbol;Acc:HGNC:30863]	protein_coding	2647.58	0.454087	0.174197	0.307922	0.200546	2.60675	0.00914055	0.148271	2784.18	1523.11	2258.74	3344.93	2725.59	2913.88	2982.6
SIRPB1	ENSG00000101307	10326	signal regulatory protein beta 1 [Source:HGNC Symbol;Acc:HGNC:15928]	protein_coding	6.95311	4.81306	1.84689	0.0157648	0.13035	2.60603	0.00915981	0.148271	1.70704	0	0	9.69192	1.10706	15.304	20.8618
GATAD2B	ENSG00000143614	57459	GATA zinc finger domain containing 2B [Source:HGNC Symbol;Acc:HGNC:30778]	protein_coding	918.775	-0.445572	0.170969	-0.304423	0.192586	-2.60615	0.00915669	0.148271	1013.98	1137.61	1093.91	669.954	780.48	974.353	761.139
SNRPG	ENSG00000143977	6637	small nuclear ribonucleoprotein polypeptide G [Source:HGNC Symbol;Acc:HGNC:11163]	protein_coding	1698.85	0.485124	0.186274	0.316542	0.219813	2.60435	0.00920474	0.148817	1659.24	1061.96	1433.26	2391.48	1948.43	1473.26	1924.34
ANKRA2	ENSG00000164331	57763	ankyrin repeat family A member 2 [Source:HGNC Symbol;Acc:HGNC:13208]	protein_coding	261.354	0.664086	0.255218	0.381952	0.357148	2.60203	0.00926731	0.148972	228.743	148.384	212.767	322.256	308.871	299.958	308.502
TYW3	ENSG00000162623	127253	tRNA-yW synthesizing protein 3 homolog [Source:HGNC Symbol;Acc:HGNC:24757]	protein_coding	588.472	0.533113	0.204873	0.340067	0.250974	2.60216	0.00926391	0.148972	506.991	410.237	491.518	860.158	587.851	583.591	678.956
SLIRP	ENSG00000119705	81892	SRA stem-loop interacting RNA binding protein [Source:HGNC Symbol;Acc:HGNC:20495]	protein_coding	1565.28	0.496488	0.19077	0.327771	0.227194	2.60254	0.00925355	0.148972	1539.75	944.127	1324.63	2198.86	1807.84	1377.36	1764.4
NBDY	ENSG00000204272	550643	negative regulator of P-body association [Source:HGNC Symbol;Acc:HGNC:50713]	protein_coding	1010.61	0.408129	0.156881	0.280317	0.175661	2.60151	0.0092814	0.148972	786.945	823.383	948.023	1292.66	1108.17	1049.85	1065.22
PROB1	ENSG00000228672	389333	proline rich basic protein 1 [Source:HGNC Symbol;Acc:HGNC:41906]	protein_coding	72.7156	-1.12212	0.431311	-0.143195	0.265453	-2.60164	0.00927786	0.148972	112.665	104.741	97.8546	55.7286	36.5331	54.074	47.4131
PHRF1	ENSG00000070047	57661	PHD and ring finger domains 1 [Source:HGNC Symbol;Acc:HGNC:24351]	protein_coding	369.623	-0.555574	0.213389	-0.352325	0.259038	-2.60358	0.00922566	0.148972	423.346	487.338	443.937	353.755	267.91	310.16	300.915
TUBGCP5	ENSG00000275835	114791	tubulin gamma complex associated protein 5 [Source:HGNC Symbol;Acc:HGNC:18600]	protein_coding	311.015	-0.704178	0.270859	-0.402568	0.377012	-2.5998	0.00932789	0.149538	303.853	484.429	406.231	218.068	203.7	332.606	228.215
ZNF670-ZNF695	ENSG00000135747		ZNF670-ZNF695 readthrough (NMD candidate) [Source:HGNC Symbol;Acc:HGNC:49200]	protein_coding	8.51608	-4.25874	1.63871	-0.0152004	0.130181	-2.59884	0.00935389	0.149775	29.0197	20.3664	2.69325	1.21149	0	0	6.32175
HERPUD1	ENSG00000051108	9709	homocysteine inducible ER protein with ubiquitin like domain 1 [Source:HGNC Symbol;Acc:HGNC:13744]	protein_coding	713.826	0.548458	0.21109	0.346382	0.261035	2.59822	0.00937073	0.149864	529.182	602.263	567.377	602.111	728.448	1080.46	886.942
TMEM258	ENSG00000134825	746	transmembrane protein 258 [Source:HGNC Symbol;Acc:HGNC:1164]	protein_coding	1482.47	0.411139	0.158275	0.285885	0.176717	2.59762	0.00938712	0.149946	1474.88	983.405	1290.96	1706.99	1732.56	1520.19	1668.31
PRDM8	ENSG00000152784	56978	PR/SET domain 8 [Source:HGNC Symbol;Acc:HGNC:13993]	protein_coding	10.7736	4.51526	1.73935	0.0178384	0.130759	2.59594	0.00943322	0.14998	1.70704	1.45474	0	1.21149	1.10706	45.9119	24.0227
PER3	ENSG00000049246	8863	period circadian regulator 3 [Source:HGNC Symbol;Acc:HGNC:8847]	protein_coding	30.9473	-1.86779	0.719364	-0.0632084	0.151063	-2.59645	0.00941934	0.14998	51.2112	55.2801	51.6206	16.9609	4.42826	24.4863	12.6435
FAHD1	ENSG00000180185	81889	fumarylacetoacetate hydrolase domain containing 1 [Source:HGNC Symbol;Acc:HGNC:14169]	protein_coding	404.783	-0.597929	0.230256	-0.366704	0.290088	-2.5968	0.00940971	0.14998	513.819	487.338	503.188	242.298	414.042	356.072	316.72
RTL10	ENSG00000215012	79680	retrotransposon Gag like 10 [Source:HGNC Symbol;Acc:HGNC:26112]	protein_coding	337.728	-0.662625	0.255258	-0.388774	0.340747	-2.5959	0.00943425	0.14998	537.718	318.588	425.533	219.28	286.73	318.323	257.927
COL14A1	ENSG00000187955	7373	collagen type XIV alpha 1 chain [Source:HGNC Symbol;Acc:HGNC:2191]	protein_coding	256.221	-0.703043	0.270915	-0.401265	0.376718	-2.59507	0.00945723	0.150166	279.955	378.233	325.434	158.705	262.374	197.931	190.917
WDR6	ENSG00000178252	11180	WD repeat domain 6 [Source:HGNC Symbol;Acc:HGNC:12758]	protein_coding	1513.23	-0.350263	0.1351	-0.263476	0.144117	-2.59262	0.00952491	0.151061	1672.9	1764.6	1734.9	1245.41	1321.84	1540.6	1312.4
ENTPD4	ENSG00000197217	9583	ectonucleoside triphosphate diphosphohydrolase 4 [Source:HGNC Symbol;Acc:HGNC:14573]	protein_coding	560.466	-0.448016	0.172993	-0.304636	0.195203	-2.58979	0.00960355	0.152127	621.363	708.459	651.766	488.231	502.607	475.443	475.396
ALKBH7	ENSG00000125652	84266	alkB homolog 7 [Source:HGNC Symbol;Acc:HGNC:21306]	protein_coding	654.228	0.684209	0.264484	0.385596	0.381384	2.58696	0.00968261	0.153197	687.937	298.222	474.46	925.579	831.405	532.578	829.414
HOXD1	ENSG00000128645	3231	homeobox D1 [Source:HGNC Symbol;Acc:HGNC:5132]	protein_coding	11.0715	-3.97811	1.53914	-0.0205554	0.131249	-2.58464	0.0097482	0.154052	1.70704	34.9138	33.2167	0	6.64239	1.02026	0
RUVBL1	ENSG00000175792	8607	RuvB like AAA ATPase 1 [Source:HGNC Symbol;Acc:HGNC:10474]	protein_coding	2597.79	0.37749	0.146087	0.268548	0.159193	2.58401	0.00976585	0.154125	2161.11	2288.31	2216.54	2194.01	3239.27	3081.2	3004.1
CBR4	ENSG00000145439	84869	carbonyl reductase 4 [Source:HGNC Symbol;Acc:HGNC:25891]	protein_coding	380.39	-0.631275	0.244334	-0.375008	0.318769	-2.58366	0.00977595	0.154125	346.529	597.898	482.989	338.006	344.297	262.208	290.801
ZDHHC24	ENSG00000174165	254359	zinc finger DHHC-type containing 24 [Source:HGNC Symbol;Acc:HGNC:27387]	protein_coding	484.801	0.503671	0.195076	0.323047	0.234338	2.58192	0.00982533	0.15472	419.932	337.5	419.249	592.419	494.858	581.551	548.096
C12orf57	ENSG00000111678	113246	chromosome 12 open reading frame 57 [Source:HGNC Symbol;Acc:HGNC:29521]	protein_coding	738.235	0.58402	0.226276	0.353677	0.291784	2.58101	0.00985114	0.15476	747.684	398.599	581.293	1070.96	740.626	734.59	893.896
TEDC1	ENSG00000185347	283643	tubulin epsilon and delta complex 1 [Source:HGNC Symbol;Acc:HGNC:20127]	protein_coding	361.713	0.566145	0.219325	0.345265	0.278959	2.58131	0.00984265	0.15476	305.56	240.032	307.928	457.943	435.076	371.376	414.075
MCRIP2	ENSG00000172366	84331	MAPK regulated corepressor interacting protein 2 [Source:HGNC Symbol;Acc:HGNC:14142]	protein_coding	353.239	0.62458	0.242174	0.357717	0.331755	2.57905	0.00990711	0.154909	300.439	205.118	305.684	502.769	402.971	366.275	389.42
LRP3	ENSG00000130881	4037	LDL receptor related protein 3 [Source:HGNC Symbol;Acc:HGNC:6695]	protein_coding	652.565	0.518775	0.201111	0.329864	0.24432	2.57954	0.00989307	0.154909	646.968	386.961	539.996	717.202	704.093	809.07	763.668
SLC29A1	ENSG00000112759	2030	solute carrier family 29 member 1 (Augustine blood group) [Source:HGNC Symbol;Acc:HGNC:11003]	protein_coding	546.575	0.505924	0.196112	0.323383	0.236296	2.57977	0.00988668	0.154909	459.194	392.78	473.114	529.421	742.84	614.199	614.474
ZFYVE26	ENSG00000072121	23503	zinc finger FYVE-type containing 26 [Source:HGNC Symbol;Acc:HGNC:20761]	protein_coding	403.544	-0.538857	0.20891	-0.34226	0.250476	-2.57938	0.00989776	0.154909	443.83	580.441	448.875	312.565	347.618	338.728	352.754
CREG1	ENSG00000143162	8804	cellular repressor of E1A stimulated genes 1 [Source:HGNC Symbol;Acc:HGNC:2351]	protein_coding	1034.39	0.454703	0.176369	0.302561	0.203656	2.57813	0.00993374	0.155143	885.954	794.288	884.732	1484.08	1003	1009.04	1179.64
UQCRH	ENSG00000173660	7388	ubiquinol-cytochrome c reductase hinge protein [Source:HGNC Symbol;Acc:HGNC:12590]	protein_coding	3541.85	0.450379	0.174735	0.298487	0.203008	2.5775	0.00995174	0.155242	3279.22	2240.3	3287.11	4924.71	4338.59	3039.37	3683.69
MTIF3	ENSG00000122033	219402	mitochondrial translational initiation factor 3 [Source:HGNC Symbol;Acc:HGNC:29788]	protein_coding	609.122	0.568097	0.220638	0.345053	0.281035	2.57479	0.0100301	0.155702	547.96	395.689	491.518	917.098	662.025	529.517	720.048
NDUFB9	ENSG00000147684	4715	NADH:ubiquinone oxidoreductase subunit B9 [Source:HGNC Symbol;Acc:HGNC:7704]	protein_coding	3316.59	0.401053	0.155781	0.276867	0.174544	2.57446	0.0100396	0.155702	3113.64	2148.65	3169.05	4293.52	3824.91	3270.97	3395.41
NPIPA9	ENSG00000233024		nuclear pore complex interacting protein family, member A9 [Source:HGNC Symbol;Acc:HGNC:41984]	protein_coding	856.371	-0.395365	0.153567	-0.276758	0.1677	-2.57454	0.0100375	0.155702	928.63	1057.6	987.524	768.085	812.585	699.901	740.277
INTS6L	ENSG00000165359	203522	integrator complex subunit 6 like [Source:HGNC Symbol;Acc:HGNC:27334]	protein_coding	305.921	-0.599338	0.232801	-0.361733	0.295359	-2.57447	0.0100394	0.155702	389.205	376.778	371.668	296.815	207.021	254.046	245.916
WNT2B	ENSG00000134245	7482	Wnt family member 2B [Source:HGNC Symbol;Acc:HGNC:12781]	protein_coding	135.238	-0.886684	0.344256	-0.403298	0.737406	-2.57566	0.010005	0.155702	129.735	240.032	178.652	102.977	105.171	95.9049	94.1941
EPB41L1	ENSG00000088367	2036	erythrocyte membrane protein band 4.1 like 1 [Source:HGNC Symbol;Acc:HGNC:3378]	protein_coding	497.22	-0.533601	0.207357	-0.337124	0.249652	-2.57335	0.0100719	0.156021	629.898	576.077	603.736	346.486	393.008	530.538	400.799
CCIN	ENSG00000185972	881	calicin [Source:HGNC Symbol;Acc:HGNC:1568]	protein_coding	10.5738	4.50178	1.74977	0.0175904	0.13071	2.57278	0.0100885	0.156096	1.70704	1.45474	0	1.21149	46.4967	1.02026	22.1261
SNAPIN	ENSG00000143553	23557	SNAP associated protein [Source:HGNC Symbol;Acc:HGNC:17145]	protein_coding	608.342	0.501202	0.194911	0.320887	0.233676	2.57143	0.0101278	0.156523	575.273	391.325	512.615	637.244	654.275	781.523	706.14
AP1S1	ENSG00000106367	1174	adaptor related protein complex 1 subunit sigma 1 [Source:HGNC Symbol;Acc:HGNC:559]	protein_coding	1243.58	0.427691	0.166373	0.290203	0.188384	2.57068	0.0101499	0.156682	1177.86	865.571	1078.2	1659.74	1242.13	1279.41	1402.16
TMBIM6	ENSG00000139644	7009	transmembrane BAX inhibitor motif containing 6 [Source:HGNC Symbol;Acc:HGNC:11723]	protein_coding	7207.12	0.268254	0.104394	0.215242	0.107289	2.56963	0.0101807	0.156856	6505.53	6026.99	6857.46	7235.02	7987.47	8270.26	7567.14
PDE6G	ENSG00000185527	5148	phosphodiesterase 6G [Source:HGNC Symbol;Acc:HGNC:8789]	protein_coding	10.5375	4.4827	1.74486	0.0176317	0.130716	2.56909	0.0101965	0.156856	1.70704	1.45474	0	1.21149	1.10706	44.8916	23.3905
MYLK3	ENSG00000140795	91807	myosin light chain kinase 3 [Source:HGNC Symbol;Acc:HGNC:29826]	protein_coding	10.5962	4.48994	1.7476	0.0175597	0.130702	2.56921	0.010193	0.156856	1.70704	1.45474	0	1.21149	45.3896	1.02026	23.3905
SCAF4	ENSG00000156304	57466	SR-related CTD associated factor 4 [Source:HGNC Symbol;Acc:HGNC:19304]	protein_coding	719.372	-0.455979	0.177531	-0.303576	0.201932	-2.56844	0.0102156	0.156969	844.985	853.933	851.515	529.421	603.35	754.996	597.406
DCTN6	ENSG00000104671	10671	dynactin subunit 6 [Source:HGNC Symbol;Acc:HGNC:16964]	protein_coding	254.33	0.669526	0.260781	0.368779	0.376877	2.56738	0.0102469	0.157269	192.896	173.114	206.033	369.505	241.34	295.877	301.548
SMC1A	ENSG00000072501	8243	structural maintenance of chromosomes 1A [Source:HGNC Symbol;Acc:HGNC:11111]	protein_coding	3970.91	-0.337035	0.131321	-0.245662	0.138659	-2.56651	0.0102728	0.157484	3927.9	5001.4	4575.83	3372.79	4176.95	3332.18	3409.32
SLC6A6	ENSG00000131389	6533	solute carrier family 6 member 6 [Source:HGNC Symbol;Acc:HGNC:11052]	protein_coding	466.258	-0.553321	0.21571	-0.341912	0.264387	-2.56512	0.0103141	0.157937	484.799	648.814	573.213	317.41	399.65	471.362	368.558
COX4I1	ENSG00000131143	1327	cytochrome c oxidase subunit 4I1 [Source:HGNC Symbol;Acc:HGNC:2265]	protein_coding	5316.96	0.354674	0.138295	0.256501	0.149705	2.56462	0.0103289	0.157981	5145.02	3668.86	4971.29	6709.23	5737.92	5385.98	5600.44
CLN6	ENSG00000128973	54982	CLN6 transmembrane ER protein [Source:HGNC Symbol;Acc:HGNC:2077]	protein_coding	651.597	0.486894	0.189932	0.315126	0.225182	2.56352	0.0103616	0.158226	605.999	439.332	548.974	638.455	725.127	847.84	755.449
CFL2	ENSG00000165410	1073	cofilin 2 [Source:HGNC Symbol;Acc:HGNC:1875]	protein_coding	1728.58	0.364099	0.142044	0.259775	0.153985	2.56329	0.0103687	0.158226	1497.07	1409.64	1554	2257.01	1800.09	1684.46	1897.79
RASGEF1A	ENSG00000198915	221002	RasGEF domain family member 1A [Source:HGNC Symbol;Acc:HGNC:24246]	protein_coding	296.102	0.5972	0.233254	0.34942	0.308467	2.5603	0.0104582	0.159228	204.845	234.213	249.125	393.734	311.085	337.708	342.007
PLEC	ENSG00000178209	5339	plectin [Source:HGNC Symbol;Acc:HGNC:9069]	protein_coding	377.786	-0.585713	0.228759	-0.352549	0.288616	-2.56039	0.0104556	0.159228	397.74	535.345	464.136	284.7	388.58	277.512	296.49
SON	ENSG00000159140	6651	SON DNA and RNA binding protein [Source:HGNC Symbol;Acc:HGNC:11183]	protein_coding	3650.46	-0.317584	0.124063	-0.238107	0.129664	-2.55985	0.0104717	0.159251	4033.74	4159.1	4141.32	3458.81	3737.45	2813.89	3208.92
IL11	ENSG00000095752	3589	interleukin 11 [Source:HGNC Symbol;Acc:HGNC:5966]	protein_coding	6.45195	4.71337	1.84337	0.0158348	0.130357	2.55694	0.0105598	0.160408	1.70704	0	0	4.84596	3.32119	16.3242	18.9653
RAB37	ENSG00000172794	326624	RAB37, member RAS oncogene family [Source:HGNC Symbol;Acc:HGNC:30268]	protein_coding	17.9248	-2.36625	0.925591	-0.045185	0.140077	-2.55647	0.0105739	0.160439	17.0704	49.4612	32.7678	8.48043	9.96358	2.04053	5.68958
HPCA	ENSG00000121905	3208	hippocalcin [Source:HGNC Symbol;Acc:HGNC:5144]	protein_coding	9.7969	4.12674	1.61456	0.0200389	0.131164	2.55596	0.0105896	0.160495	1.70704	1.45474	0	1.21149	11.0706	18.3648	34.7696
CYB5A	ENSG00000166347	1528	cytochrome b5 type A [Source:HGNC Symbol;Acc:HGNC:2570]	protein_coding	490.513	0.563122	0.220357	0.340072	0.280695	2.5555	0.0106035	0.160523	476.264	285.129	398.601	497.923	557.961	633.584	584.13
UFC1	ENSG00000143222	51506	ubiquitin-fold modifier conjugating enzyme 1 [Source:HGNC Symbol;Acc:HGNC:26941]	protein_coding	1349.89	0.447715	0.175339	0.294841	0.20175	2.55343	0.0106669	0.161299	1334.91	880.118	1143.28	1819.66	1373.87	1349.81	1547.56
C4orf3	ENSG00000164096	401152	chromosome 4 open reading frame 3 [Source:HGNC Symbol;Acc:HGNC:19225]	protein_coding	921.022	0.507891	0.198977	0.320425	0.240784	2.55252	0.0106948	0.161437	853.52	618.265	758.598	1372.62	853.547	912.116	1078.49
TMA16	ENSG00000198498	55319	translation machinery associated 16 homolog [Source:HGNC Symbol;Acc:HGNC:25638]	protein_coding	654.517	0.492527	0.192971	0.31187	0.231669	2.55234	0.0107003	0.161437	599.171	416.056	581.293	789.892	819.228	659.091	716.887
SFI1	ENSG00000198089	9814	SFI1 centrin binding protein [Source:HGNC Symbol;Acc:HGNC:29064]	protein_coding	402.209	-0.560805	0.219813	-0.341607	0.271997	-2.55128	0.0107328	0.161745	445.537	539.709	491.069	268.951	400.757	348.93	320.513
NDST2	ENSG00000166507	8509	N-deacetylase and N-sulfotransferase 2 [Source:HGNC Symbol;Acc:HGNC:7681]	protein_coding	8.64903	-3.91464	1.53545	-0.0216366	0.131506	-2.54951	0.0107875	0.162102	1.70704	33.459	18.4039	4.84596	1.10706	1.02026	0
IKZF4	ENSG00000123411	64375	IKAROS family zinc finger 4 [Source:HGNC Symbol;Acc:HGNC:13179]	protein_coding	97.1674	-0.99421	0.389958	-0.172088	0.343567	-2.54953	0.0107868	0.162102	167.29	110.56	129.276	66.632	55.3532	84.682	66.3784
PAN2	ENSG00000135473	9924	poly(A) specific ribonuclease subunit PAN2 [Source:HGNC Symbol;Acc:HGNC:20074]	protein_coding	593.719	-0.505597	0.198326	-0.320396	0.234722	-2.54933	0.010793	0.162102	617.949	804.471	716.404	422.81	615.528	500.95	477.924
PLPP3	ENSG00000162407	8613	phospholipid phosphatase 3 [Source:HGNC Symbol;Acc:HGNC:9229]	protein_coding	60.3745	1.34784	0.528912	0.0837295	0.168418	2.54833	0.0108241	0.162385	44.383	17.4569	35.4611	78.7469	54.2462	105.087	87.2402
ADAM15	ENSG00000143537	8751	ADAM metallopeptidase domain 15 [Source:HGNC Symbol;Acc:HGNC:193]	protein_coding	1528.5	0.348184	0.136724	0.251112	0.146899	2.54662	0.0108772	0.162999	1357.1	1205.98	1409.91	1738.49	1518.89	1824.23	1644.92
EIF4A1	ENSG00000161960	1973	eukaryotic translation initiation factor 4A1 [Source:HGNC Symbol;Acc:HGNC:3282]	protein_coding	43.1273	-1.93405	0.759889	-0.0557414	0.145865	-2.54518	0.0109222	0.163489	138.27	8.72844	74.0643	19.3838	28.7837	19.385	13.2757
MED13L	ENSG00000123066	23389	mediator complex subunit 13L [Source:HGNC Symbol;Acc:HGNC:22962]	protein_coding	724.592	-0.408104	0.160505	-0.278949	0.176997	-2.54263	0.0110023	0.164503	774.996	912.122	840.293	625.129	626.599	670.314	622.693
PTTG1IP	ENSG00000183255	754	PTTG1 interacting protein [Source:HGNC Symbol;Acc:HGNC:13524]	protein_coding	2383.69	0.378962	0.14918	0.265507	0.163362	2.54031	0.0110755	0.164858	2451.31	1582.76	2079.19	2633.78	2715.63	2541.48	2681.69
ERFL	ENSG00000268041	390937	ETS repressor factor like [Source:HGNC Symbol;Acc:HGNC:53894]	protein_coding	17.6523	-2.1455	0.844331	-0.0514113	0.143379	-2.54106	0.0110516	0.164858	29.0197	36.3685	29.6257	7.26894	5.53532	8.16212	7.5861
NSD1	ENSG00000165671	64324	nuclear receptor binding SET domain protein 1 [Source:HGNC Symbol;Acc:HGNC:14234]	protein_coding	2163.75	-0.330895	0.130211	-0.241103	0.136954	-2.54122	0.0110466	0.164858	2289.14	2583.62	2471.5	1834.2	2248.45	1835.46	1883.88
MFSD11	ENSG00000092931	79157	major facilitator superfamily domain containing 11 [Source:HGNC Symbol;Acc:HGNC:25458]	protein_coding	223.368	-0.759531	0.298975	-0.376912	0.484607	-2.54045	0.011071	0.164858	230.45	346.228	296.257	124.784	177.13	227.519	161.205
DGCR6	ENSG00000183628	8214	DiGeorge syndrome critical region gene 6 [Source:HGNC Symbol;Acc:HGNC:2846]	protein_coding	248.868	1.04919	0.413349	0.124194	0.223374	2.53827	0.0111402	0.165614	249.228	75.6465	140.049	503.98	252.411	159.161	361.604
FAM133A	ENSG00000179083	286499	family with sequence similarity 133 member A [Source:HGNC Symbol;Acc:HGNC:26748]	protein_coding	62.9928	1.36175	0.536561	0.0817118	0.166422	2.53793	0.0111512	0.165614	42.676	21.8211	35.91	132.052	48.7108	69.378	90.4011
POLR2L	ENSG00000177700	5441	RNA polymerase II, I and III subunit L [Source:HGNC Symbol;Acc:HGNC:9199]	protein_coding	1640.78	0.449674	0.177267	0.292711	0.205788	2.5367	0.0111903	0.165927	1589.25	1016.86	1472.76	2270.33	1708.2	1657.93	1770.09
CSPG4	ENSG00000173546	1464	chondroitin sulfate proteoglycan 4 [Source:HGNC Symbol;Acc:HGNC:2466]	protein_coding	110.49	-0.96675	0.381137	-0.178852	0.364241	-2.53649	0.0111971	0.165927	184.36	126.562	148.129	84.8043	99.6358	54.074	75.861
PSMA4	ENSG00000041357	5685	proteasome 20S subunit alpha 4 [Source:HGNC Symbol;Acc:HGNC:9533]	protein_coding	3925.23	0.352476	0.139049	0.249967	0.149383	2.5349	0.0112479	0.16631	3424.32	3292.08	3462.17	5151.26	4369.58	3410.74	4366.43
FBL	ENSG00000105202	2091	fibrillarin [Source:HGNC Symbol;Acc:HGNC:3599]	protein_coding	8292.14	0.291257	0.114893	0.218708	0.120049	2.53503	0.0112439	0.16631	7120.06	6611.8	8382.73	9221.87	9217.42	9330.32	8160.75
KLF14	ENSG00000266265	136259	Kruppel like factor 14 [Source:HGNC Symbol;Acc:HGNC:23025]	protein_coding	10.2111	4.44172	1.75339	0.0173359	0.130655	2.53322	0.011302	0.166864	1.70704	1.45474	0	1.21149	1.10706	43.8714	22.1261
TCOF1	ENSG00000070814	6949	treacle ribosome biogenesis factor 1 [Source:HGNC Symbol;Acc:HGNC:11654]	protein_coding	2242.64	-0.372762	0.147184	-0.261475	0.15901	-2.53263	0.0113212	0.166864	2121.85	2961.85	2640.28	1818.45	1987.18	2279.27	1889.57
RREB1	ENSG00000124782	6239	ras responsive element binding protein 1 [Source:HGNC Symbol;Acc:HGNC:10449]	protein_coding	383.86	-0.633091	0.24998	-0.355143	0.335794	-2.53257	0.011323	0.166864	341.408	609.536	490.171	260.47	334.333	362.194	288.904
AGMAT	ENSG00000116771	79814	agmatinase [Source:HGNC Symbol;Acc:HGNC:18407]	protein_coding	21.7742	2.49327	0.984647	0.0361584	0.13607	2.53215	0.0113366	0.166879	11.9493	1.45474	4.93762	62.9975	24.3554	8.16212	38.5627
PEX7	ENSG00000112357	5191	peroxisomal biogenesis factor 7 [Source:HGNC Symbol;Acc:HGNC:8860]	protein_coding	235.555	0.695919	0.2752	0.349112	0.433208	2.52877	0.0114462	0.167006	209.966	128.017	185.834	255.624	319.942	266.289	283.214
POLE4	ENSG00000115350	56655	DNA polymerase epsilon 4, accessory subunit [Source:HGNC Symbol;Acc:HGNC:18755]	protein_coding	545.188	0.612648	0.24215	0.343928	0.330178	2.53004	0.0114049	0.167006	510.405	327.317	420.595	688.127	783.802	425.45	660.623
PODXL2	ENSG00000114631	50512	podocalyxin like 2 [Source:HGNC Symbol;Acc:HGNC:17936]	protein_coding	917.089	0.4294	0.169933	0.283911	0.193762	2.52688	0.0115082	0.167006	868.883	612.446	819.645	1041.88	960.932	1110.05	1005.79
DNTTIP1	ENSG00000101457	116092	deoxynucleotidyltransferase terminal interacting protein 1 [Source:HGNC Symbol;Acc:HGNC:16160]	protein_coding	646.131	0.425087	0.168114	0.282253	0.190877	2.52857	0.0114529	0.167006	551.374	488.793	583.986	751.124	740.626	695.82	711.197
MTPN	ENSG00000105887	136319	myotrophin [Source:HGNC Symbol;Acc:HGNC:15667]	protein_coding	4007.3	0.333474	0.131913	0.245496	0.140453	2.52798	0.0114722	0.167006	3885.22	2990.95	3604.01	4957.42	4367.37	3852.52	4393.62
NDUFV1	ENSG00000167792	4723	NADH:ubiquinone oxidoreductase core subunit V1 [Source:HGNC Symbol;Acc:HGNC:7716]	protein_coding	2538.08	0.331724	0.131271	0.238132	0.139019	2.52702	0.0115035	0.167006	2174.77	2234.48	2234.95	2317.58	2814.16	3128.13	2862.49
CYP26A1	ENSG00000095596	1592	cytochrome P450 family 26 subfamily A member 1 [Source:HGNC Symbol;Acc:HGNC:2603]	protein_coding	30.9796	1.85618	0.733633	0.0537524	0.144692	2.53012	0.0114023	0.167006	10.2422	13.0927	14.364	15.7494	59.7815	53.0538	50.574
NRL	ENSG00000129535	4901	neural retina leucine zipper [Source:HGNC Symbol;Acc:HGNC:8002]	protein_coding	9.72903	4.2286	1.67344	0.0187984	0.130919	2.52689	0.0115076	0.167006	1.70704	1.45474	0	6.05745	28.7837	1.02026	29.0801
RUNX1	ENSG00000159216	861	RUNX family transcription factor 1 [Source:HGNC Symbol;Acc:HGNC:10471]	protein_coding	14.7345	3.9725	1.57001	0.0183559	0.130816	2.53024	0.0113986	0.167006	3.41408	1.45474	0	1.21149	1.10706	42.8511	53.1027
ADRA2B	ENSG00000274286	151	adrenoceptor alpha 2B [Source:HGNC Symbol;Acc:HGNC:282]	protein_coding	5.53872	5.67257	2.24302	0.0110724	0.129708	2.52899	0.0114392	0.167006	0	0	0	4.84596	0	19.385	14.54
NUMA1	ENSG00000137497	4926	nuclear mitotic apparatus protein 1 [Source:HGNC Symbol;Acc:HGNC:8059]	protein_coding	1430.67	-0.368122	0.145441	-0.259943	0.155681	-2.53108	0.011371	0.167006	1631.93	1798.06	1498.34	1109.73	1390.47	1226.36	1359.81
ACACA	ENSG00000278540	31	acetyl-CoA carboxylase alpha [Source:HGNC Symbol;Acc:HGNC:84]	protein_coding	1429.83	-0.428998	0.169717	-0.285992	0.190445	-2.52773	0.0114803	0.167006	1365.63	1936.26	1718.29	1051.57	1497.86	1267.17	1172.05
PWWP3A	ENSG00000160953	84939	PWWP domain containing 3A, DNA repair factor [Source:HGNC Symbol;Acc:HGNC:29641]	protein_coding	468.891	-0.478962	0.189344	-0.307066	0.219749	-2.52959	0.0114196	0.167006	595.757	533.89	546.28	388.888	375.295	448.916	393.213
GDF7	ENSG00000143869	151449	growth differentiation factor 7 [Source:HGNC Symbol;Acc:HGNC:4222]	protein_coding	247.807	-0.700911	0.277452	-0.364616	0.409684	-2.52624	0.0115289	0.167125	308.974	325.862	316.457	139.321	199.272	260.167	184.595
RBX1	ENSG00000100387	9978	ring-box 1 [Source:HGNC Symbol;Acc:HGNC:9928]	protein_coding	1428.3	0.466209	0.184934	0.307371	0.216737	2.52095	0.0117039	0.167475	1401.48	936.853	1185.03	2041.36	1460.22	1313.08	1660.09
PHF5A	ENSG00000100410	84844	PHD finger protein 5A [Source:HGNC Symbol;Acc:HGNC:18000]	protein_coding	1081.59	0.441754	0.175029	0.286681	0.201817	2.52389	0.0116063	0.167475	940.579	791.379	965.529	1404.12	1342.87	945.785	1180.9
SPG21	ENSG00000090487	51324	SPG21 abhydrolase domain containing, maspardin [Source:HGNC Symbol;Acc:HGNC:20373]	protein_coding	751.569	0.42153	0.167199	0.276752	0.189273	2.52113	0.0116979	0.167475	681.109	539.709	671.067	904.983	835.834	798.867	829.414
RPS27A	ENSG00000143947	6233	ribosomal protein S27a [Source:HGNC Symbol;Acc:HGNC:10417]	protein_coding	15756.3	0.322536	0.127927	0.23618	0.135037	2.52124	0.0116943	0.167475	13449.8	13863.7	14079.4	20777.1	16851.7	13912.3	17360.2
HMGB2	ENSG00000164104	3148	high mobility group box 2 [Source:HGNC Symbol;Acc:HGNC:5000]	protein_coding	5142.65	0.310359	0.122948	0.227713	0.128769	2.52432	0.0115922	0.167475	4562.92	4354.04	4666.05	6619.58	4975.15	5211.51	5609.29
KLLN	ENSG00000227268	100144748	killin, p53 regulated DNA replication inhibitor [Source:HGNC Symbol;Acc:HGNC:37212]	protein_coding	9.41742	4.13868	1.64055	0.0194497	0.131043	2.52274	0.0116444	0.167475	1.70704	1.45474	0	10.9034	1.10706	20.4053	30.3444
C1orf167	ENSG00000215910	284498	chromosome 1 open reading frame 167 [Source:HGNC Symbol;Acc:HGNC:25262]	protein_coding	13.1405	3.91007	1.55	0.0189195	0.130927	2.52262	0.0116484	0.167475	3.41408	1.45474	0	1.21149	39.8543	3.06079	42.9879
ZNF85	ENSG00000105750	7639	zinc finger protein 85 [Source:HGNC Symbol;Acc:HGNC:13160]	protein_coding	31.5307	5.48449	2.17494	0.00989526	0.129569	2.52168	0.0116797	0.167475	1.70704	2.90948	0	138.11	1.10706	1.02026	75.861
ZNF354C	ENSG00000177932	30832	zinc finger protein 354C [Source:HGNC Symbol;Acc:HGNC:16736]	protein_coding	5.71883	-4.24118	1.68102	-0.020657	0.131296	-2.52298	0.0116366	0.167475	10.2422	11.6379	14.8129	1.21149	1.10706	1.02026	0
CSAG2	ENSG00000268902	102723547	CSAG family member 2 [Source:HGNC Symbol;Acc:HGNC:16847]	protein_coding	133.274	-0.908938	0.359976	-0.209019	0.483203	-2.525	0.0115699	0.167475	121.2	241.487	181.345	100.554	114.028	82.6414	91.6654
	ENSG00000183889		novel member of the nuclear pore complex interacting protein NPIP gene family	protein_coding	875.696	-0.391167	0.1551	-0.268455	0.16929	-2.52203	0.0116681	0.167475	911.559	1111.42	1013.11	775.354	826.977	736.631	754.817
ZNF276	ENSG00000158805	92822	zinc finger protein 276 [Source:HGNC Symbol;Acc:HGNC:23330]	protein_coding	360.754	-0.596169	0.236241	-0.343975	0.305161	-2.52356	0.0116173	0.167475	414.811	477.155	447.528	249.567	390.794	262.208	283.214
PLCD1	ENSG00000187091	5333	phospholipase C delta 1 [Source:HGNC Symbol;Acc:HGNC:9060]	protein_coding	92.4023	1.07897	0.42815	0.116311	0.209576	2.52007	0.0117331	0.167713	39.2619	69.8275	61.0469	76.3239	139.49	135.695	125.171
CNIH4	ENSG00000143771	29097	cornichon family AMPA receptor auxiliary protein 4 [Source:HGNC Symbol;Acc:HGNC:25013]	protein_coding	2314.71	0.450409	0.178807	0.291708	0.206718	2.51897	0.01177	0.167755	2277.19	1562.39	1909.06	3224.99	2628.17	1901.77	2699.39
RPS4X	ENSG00000198034	6191	ribosomal protein S4 X-linked [Source:HGNC Symbol;Acc:HGNC:10424]	protein_coding	37967.7	0.279696	0.111041	0.212925	0.11423	2.51885	0.0117738	0.167755	30469	36733.7	34403.5	46172.3	39176.8	37176.4	41642
LAMA5	ENSG00000130702	3911	laminin subunit alpha 5 [Source:HGNC Symbol;Acc:HGNC:6485]	protein_coding	423.613	-0.757672	0.300776	-0.349131	0.515642	-2.51906	0.0117668	0.167755	312.388	755.01	583.537	225.337	400.757	405.045	283.214
ACTR3C	ENSG00000106526	653857	actin related protein 3C [Source:HGNC Symbol;Acc:HGNC:37282]	protein_coding	10.8663	4.34566	1.72605	0.0173937	0.130648	2.51769	0.0118128	0.168131	1.70704	1.45474	0	1.21149	36.5331	1.02026	34.1375
KDM3B	ENSG00000120733	51780	lysine demethylase 3B [Source:HGNC Symbol;Acc:HGNC:1337]	protein_coding	1071.68	-0.425727	0.169148	-0.282747	0.189299	-2.51689	0.0118397	0.168333	1184.69	1307.81	1266.28	777.777	1170.17	904.975	890.103
MEIOC	ENSG00000180336	284071	meiosis specific with coiled-coil domain [Source:HGNC Symbol;Acc:HGNC:26670]	protein_coding	108.349	1.01645	0.404198	0.129031	0.231043	2.51473	0.0119122	0.168824	64.8675	68.3728	73.1665	88.4388	117.349	198.952	147.297
TSLP	ENSG00000145777	85480	thymic stromal lymphopoietin [Source:HGNC Symbol;Acc:HGNC:30743]	protein_coding	86.6184	1.80702	0.718498	0.052142	0.143734	2.515	0.0119033	0.168824	17.0704	66.9181	23.7903	271.374	52.032	18.3648	156.779
KMT2A	ENSG00000118058	4297	lysine methyltransferase 2A [Source:HGNC Symbol;Acc:HGNC:7132]	protein_coding	1372.77	-0.397171	0.157898	-0.271239	0.173244	-2.51537	0.0118909	0.168824	1365.63	1799.51	1601.14	1184.84	1429.22	1075.36	1153.72
TIMM17A	ENSG00000134375	10440	translocase of inner mitochondrial membrane 17A [Source:HGNC Symbol;Acc:HGNC:17315]	protein_coding	1454.47	0.390287	0.1553	0.266416	0.171745	2.51311	0.0119672	0.169168	1357.1	1066.32	1287.82	1904.46	1535.5	1416.13	1613.94
SH2D3C	ENSG00000095370	10044	SH2 domain containing 3C [Source:HGNC Symbol;Acc:HGNC:16884]	protein_coding	28.9156	2.24612	0.893973	0.0404481	0.137836	2.51252	0.0119873	0.169168	5.12112	14.5474	8.07974	59.363	4.42826	57.1348	53.7349
CCL5	ENSG00000271503	6352	C-C motif chemokine ligand 5 [Source:HGNC Symbol;Acc:HGNC:10632]	protein_coding	7.77031	-4.21965	1.67871	-0.0192631	0.130988	-2.51363	0.0119495	0.169168	1.70704	23.2758	25.137	1.21149	0	3.06079	0
ADAR	ENSG00000160710	103	adenosine deaminase RNA specific [Source:HGNC Symbol;Acc:HGNC:225]	protein_coding	2864.68	-0.29187	0.116164	-0.219121	0.119572	-2.51257	0.0119857	0.169168	2903.68	3460.83	3225.16	2538.07	2714.52	2671.05	2539.45
PXDN	ENSG00000130508	7837	peroxidasin [Source:HGNC Symbol;Acc:HGNC:14966]	protein_coding	334.618	-0.588637	0.234456	-0.338549	0.301586	-2.51065	0.0120509	0.169886	380.67	448.06	410.72	214.434	317.728	307.1	263.617
NELFE	ENSG00000204356	7936	negative elongation factor complex member E [Source:HGNC Symbol;Acc:HGNC:13974]	protein_coding	1152.34	0.433324	0.172657	0.280324	0.19933	2.50973	0.0120822	0.169969	1048.12	736.099	1103.78	1434.4	1226.63	1339.61	1177.74
EMILIN2	ENSG00000132205	84034	elastin microfibril interfacer 2 [Source:HGNC Symbol;Acc:HGNC:19881]	protein_coding	283.582	-0.727917	0.290038	-0.353569	0.461081	-2.50973	0.0120823	0.169969	228.743	496.067	370.77	221.703	263.481	202.012	202.296
ISYNA1	ENSG00000105655	51477	inositol-3-phosphate synthase 1 [Source:HGNC Symbol;Acc:HGNC:29821]	protein_coding	1011.06	0.506641	0.202072	0.310549	0.245632	2.50723	0.0121681	0.170209	824.5	823.383	802.588	890.445	927.72	1572.23	1236.53
CKMT1A	ENSG00000223572	548596	creatine kinase, mitochondrial 1A [Source:HGNC Symbol;Acc:HGNC:31736]	protein_coding	2390.4	0.32054	0.127831	0.232039	0.135732	2.50753	0.0121577	0.170209	1998.94	1926.08	2366.02	2625.3	2803.09	2609.84	2403.53
FBXO2	ENSG00000116661	26232	F-box protein 2 [Source:HGNC Symbol;Acc:HGNC:13581]	protein_coding	71.28	1.28335	0.511628	0.0867518	0.17135	2.50837	0.0121289	0.170209	18.7774	58.1896	40.8476	101.765	59.7815	115.29	104.309
CNTNAP1	ENSG00000108797	8506	contactin associated protein 1 [Source:HGNC Symbol;Acc:HGNC:8011]	protein_coding	104.924	-1.04884	0.418364	-0.135709	0.243955	-2.507	0.012176	0.170209	114.372	184.752	145.884	56.9401	53.1391	114.27	65.114
GTF3C1	ENSG00000077235	2975	general transcription factor IIIC subunit 1 [Source:HGNC Symbol;Acc:HGNC:4664]	protein_coding	1388.17	-0.442861	0.176624	-0.287627	0.200458	-2.50737	0.0121634	0.170209	1300.76	1917.35	1677.89	1000.69	1461.33	1234.52	1124.64
RPUSD2	ENSG00000166133	27079	RNA pseudouridine synthase domain containing 2 [Source:HGNC Symbol;Acc:HGNC:24180]	protein_coding	227.72	-0.662146	0.264043	-0.35229	0.371681	-2.50771	0.0121515	0.170209	295.318	286.584	282.342	190.204	145.025	216.296	178.273
RPS8	ENSG00000142937	6202	ribosomal protein S8 [Source:HGNC Symbol;Acc:HGNC:10441]	protein_coding	25044.1	0.292043	0.11654	0.225583	0.121623	2.50593	0.0122128	0.170544	24149.5	18750.2	23805.6	30139.5	26590.6	25721.9	26151.8
PDHB	ENSG00000168291	5162	pyruvate dehydrogenase E1 subunit beta [Source:HGNC Symbol;Acc:HGNC:8808]	protein_coding	2122.57	0.319189	0.127459	0.232265	0.134366	2.50426	0.0122709	0.171176	1964.8	1671.5	1949.91	2525.96	2142.17	2308.86	2294.8
TMC5	ENSG00000103534	79838	transmembrane channel like 5 [Source:HGNC Symbol;Acc:HGNC:22999]	protein_coding	19.7827	-3.89898	1.55734	-0.0111894	0.129681	-2.50361	0.0122933	0.17131	1.70704	87.2844	0	1.21149	1.10706	1.02026	46.1488
MANBA	ENSG00000109323	4126	mannosidase beta [Source:HGNC Symbol;Acc:HGNC:6831]	protein_coding	241.954	-0.63392	0.253319	-0.345178	0.344271	-2.50246	0.0123335	0.171689	305.56	308.405	295.808	237.452	177.13	176.506	192.813
BEX3	ENSG00000166681	27018	brain expressed X-linked 3 [Source:HGNC Symbol;Acc:HGNC:13388]	protein_coding	5129.68	0.355814	0.14235	0.241416	0.152618	2.49957	0.0124344	0.172733	5206.47	3585.94	4491.89	6493.59	4980.68	5408.42	5740.78
CENPC	ENSG00000145241	1060	centromere protein C [Source:HGNC Symbol;Acc:HGNC:1854]	protein_coding	214.973	0.961481	0.384629	0.14019	0.252558	2.49976	0.0124276	0.172733	110.958	173.114	135.111	457.943	161.631	163.242	302.812
CYBA	ENSG00000051523	1535	cytochrome b-245 alpha chain [Source:HGNC Symbol;Acc:HGNC:2577]	protein_coding	1570.02	0.38126	0.152628	0.263493	0.169114	2.49797	0.0124907	0.173273	1447.57	1069.23	1508.22	1756.66	1865.4	1730.37	1612.68
EPPK1	ENSG00000261150	83481	epiplakin 1 [Source:HGNC Symbol;Acc:HGNC:15577]	protein_coding	323.986	-0.678695	0.271725	-0.34615	0.397213	-2.49773	0.0124992	0.173273	411.397	414.601	407.129	385.254	210.342	198.952	240.227
BMP4	ENSG00000125378	652	bone morphogenetic protein 4 [Source:HGNC Symbol;Acc:HGNC:1071]	protein_coding	196.124	0.679321	0.272202	0.326152	0.427711	2.49565	0.0125726	0.173747	141.684	135.291	162.493	227.76	219.199	255.066	231.376
NDUFA1	ENSG00000125356	4694	NADH:ubiquinone oxidoreductase subunit A1 [Source:HGNC Symbol;Acc:HGNC:7683]	protein_coding	2381.15	0.451165	0.180758	0.284906	0.213484	2.49596	0.0125616	0.173747	2203.79	1387.82	2334.6	3309.79	2592.75	2494.55	2344.74
JMJD1C	ENSG00000171988	221037	jumonji domain containing 1C [Source:HGNC Symbol;Acc:HGNC:12313]	protein_coding	431.915	-0.589788	0.236267	-0.333604	0.306321	-2.49628	0.0125504	0.173747	513.819	549.892	535.956	490.654	269.017	326.485	337.582
IRF2BP2	ENSG00000168264	359948	interferon regulatory factor 2 binding protein 2 [Source:HGNC Symbol;Acc:HGNC:21729]	protein_coding	1167.48	-0.346724	0.138984	-0.246705	0.147654	-2.4947	0.0126065	0.174035	1225.65	1427.1	1332.71	1049.15	1011.86	1104.95	1020.96
CCDC153	ENSG00000248712	283152	coiled-coil domain containing 153 [Source:HGNC Symbol;Acc:HGNC:27446]	protein_coding	49.2462	1.54642	0.620182	0.0653229	0.152288	2.49349	0.0126494	0.174166	40.969	7.2737	22.8926	82.3813	50.925	66.3172	73.9645
DOK3	ENSG00000146094	79930	docking protein 3 [Source:HGNC Symbol;Acc:HGNC:24583]	protein_coding	54.9726	-1.67744	0.672872	-0.0633505	0.150737	-2.49296	0.0126683	0.174166	44.383	128.017	96.0591	6.05745	37.6402	53.0538	19.5974
SF3A3	ENSG00000183431	10946	splicing factor 3a subunit 3 [Source:HGNC Symbol;Acc:HGNC:10767]	protein_coding	1646.73	-0.354963	0.142385	-0.248838	0.152029	-2.49298	0.0126675	0.174166	1763.37	1966.81	1907.72	1245.41	1621.85	1605.9	1416.07
TLN1	ENSG00000137076	7094	talin 1 [Source:HGNC Symbol;Acc:HGNC:11845]	protein_coding	1523.86	-0.46961	0.188318	-0.293744	0.218697	-2.49371	0.0126417	0.174166	1305.89	2230.12	1887.52	1087.92	1531.07	1420.21	1204.29
VAMP8	ENSG00000118640	8673	vesicle associated membrane protein 8 [Source:HGNC Symbol;Acc:HGNC:12647]	protein_coding	748.207	0.464367	0.186346	0.291773	0.219072	2.49197	0.0127038	0.174295	720.371	485.883	641.891	963.135	791.551	785.604	849.011
ARHGAP27	ENSG00000159314	201176	Rho GTPase activating protein 27 [Source:HGNC Symbol;Acc:HGNC:31813]	protein_coding	183.299	-0.827612	0.3321	-0.272949	0.692421	-2.49206	0.0127006	0.174295	281.662	206.573	242.841	94.4963	203.7	125.493	128.332
RPF1	ENSG00000117133	80135	ribosome production factor 1 homolog [Source:HGNC Symbol;Acc:HGNC:30350]	protein_coding	750.297	0.435167	0.174717	0.281402	0.200246	2.49069	0.0127495	0.174336	670.867	552.801	654.01	785.046	984.18	758.057	847.115
ADRM1	ENSG00000130706	11047	adhesion regulating molecule 1 [Source:HGNC Symbol;Acc:HGNC:15759]	protein_coding	1723.08	0.382051	0.153429	0.261351	0.168521	2.49008	0.0127713	0.174336	1655.83	1272.9	1485.33	1698.51	1727.02	2252.74	1969.23
PPIE	ENSG00000084072	10450	peptidylprolyl isomerase E [Source:HGNC Symbol;Acc:HGNC:9258]	protein_coding	1522.82	0.364292	0.14625	0.253727	0.158898	2.49088	0.0127427	0.174336	1473.18	1093.96	1363.68	1709.41	1792.34	1548.76	1678.43
GNPTG	ENSG00000090581	84572	N-acetylglucosamine-1-phosphate transferase subunit gamma [Source:HGNC Symbol;Acc:HGNC:23026]	protein_coding	294.818	0.815967	0.327786	0.220695	0.499299	2.48933	0.0127984	0.174336	261.177	158.567	199.3	180.512	489.323	373.417	401.431
CKMT1B	ENSG00000237289	1159	creatine kinase, mitochondrial 1B [Source:HGNC Symbol;Acc:HGNC:1995]	protein_coding	2571.79	0.299456	0.120263	0.217277	0.125457	2.49001	0.0127739	0.174336	2075.76	2257.76	2493.5	2747.66	2956.97	2822.05	2648.81
HLTF	ENSG00000071794	6596	helicase like transcription factor [Source:HGNC Symbol;Acc:HGNC:11099]	protein_coding	1719.06	-0.391998	0.157384	-0.262829	0.17199	-2.4907	0.0127492	0.174336	1794.1	2154.47	2011.41	1848.73	1536.61	1233.5	1454.64
CREB3L2	ENSG00000182158	64764	cAMP responsive element binding protein 3 like 2 [Source:HGNC Symbol;Acc:HGNC:23720]	protein_coding	1057.47	-0.397084	0.159507	-0.266993	0.175059	-2.48944	0.0127944	0.174336	1268.33	1172.52	1233.51	766.873	1028.46	1035.57	897.057
TMEM169	ENSG00000163449	92691	transmembrane protein 169 [Source:HGNC Symbol;Acc:HGNC:25130]	protein_coding	31.0502	1.77208	0.711994	0.0546011	0.145075	2.4889	0.012814	0.174369	13.6563	10.1832	15.7106	70.2664	23.2484	38.7701	45.5166
ROMO1	ENSG00000125995	140823	reactive oxygen species modulator 1 [Source:HGNC Symbol;Acc:HGNC:16185]	protein_coding	924.151	0.569119	0.228804	0.318922	0.30003	2.48736	0.0128694	0.174945	1024.22	443.696	708.773	1075.8	1138.06	943.745	1134.75
CDC42	ENSG00000070831	998	cell division cycle 42 [Source:HGNC Symbol;Acc:HGNC:1736]	protein_coding	3004	0.288602	0.116054	0.211954	0.119718	2.48679	0.0128901	0.175047	2683.47	2583.62	2743.52	2914.85	3527.11	3294.43	3280.99
TWF2	ENSG00000247596	11344	twinfilin actin binding protein 2 [Source:HGNC Symbol;Acc:HGNC:9621]	protein_coding	470.623	0.593297	0.238681	0.324668	0.322494	2.48573	0.0129285	0.175212	329.459	401.508	365.833	358.601	581.209	672.354	585.394
ZDHHC14	ENSG00000175048	79683	zinc finger DHHC-type palmitoyltransferase 14 [Source:HGNC Symbol;Acc:HGNC:20341]	protein_coding	91.836	-1.16585	0.468999	-0.107702	0.196289	-2.48582	0.0129252	0.175212	75.1098	189.116	136.907	88.4388	36.5331	64.2767	52.4705
PRPF38A	ENSG00000134748	84950	pre-mRNA processing factor 38A [Source:HGNC Symbol;Acc:HGNC:25930]	protein_coding	944.322	-0.380005	0.152926	-0.259218	0.165862	-2.4849	0.0129589	0.175446	1002.03	1172.52	1086.73	930.425	777.159	823.353	818.035
SRR	ENSG00000167720	63826	serine racemase [Source:HGNC Symbol;Acc:HGNC:14398]	protein_coding	224.698	0.675077	0.271922	0.321489	0.427487	2.48261	0.0130422	0.175503	174.118	146.929	183.141	328.314	226.948	247.924	265.514
CZIB	ENSG00000162384	54987	CXXC motif containing zinc binding protein [Source:HGNC Symbol;Acc:HGNC:26059]	protein_coding	609.632	0.506671	0.204116	0.303691	0.250121	2.48227	0.0130548	0.175503	513.819	450.97	512.166	856.524	706.307	523.396	704.243
PSMC1	ENSG00000100764	5700	proteasome 26S subunit, ATPase 1 [Source:HGNC Symbol;Acc:HGNC:9547]	protein_coding	1693.77	0.330994	0.133304	0.236219	0.141735	2.48301	0.0130278	0.175503	1551.7	1310.72	1572.86	2009.86	1748.05	1850.76	1812.45
GSTM4	ENSG00000168765	2948	glutathione S-transferase mu 4 [Source:HGNC Symbol;Acc:HGNC:4636]	protein_coding	141.685	0.807656	0.325283	0.211892	0.44839	2.48293	0.0130306	0.175503	102.422	85.8297	110.423	159.917	209.235	152.019	171.952
FABP6	ENSG00000170231	2172	fatty acid binding protein 6 [Source:HGNC Symbol;Acc:HGNC:3561]	protein_coding	39.5426	1.97671	0.795831	0.0434889	0.139018	2.48383	0.0129978	0.175503	23.8986	0	20.6482	82.3813	52.032	56.1145	41.7236
SPAG9	ENSG00000008294	9043	sperm associated antigen 9 [Source:HGNC Symbol;Acc:HGNC:14524]	protein_coding	1689.63	-0.313145	0.12613	-0.228078	0.131228	-2.48271	0.0130386	0.175503	1913.59	1891.16	1895.6	1620.97	1607.46	1394.7	1503.94
COL4A1	ENSG00000187498	1282	collagen type IV alpha 1 chain [Source:HGNC Symbol;Acc:HGNC:2202]	protein_coding	334.366	-0.73519	0.296178	-0.323961	0.500023	-2.48226	0.0130553	0.175503	269.712	576.077	448.875	220.491	364.224	228.539	232.64
TIGD2	ENSG00000180346	166815	tigger transposable element derived 2 [Source:HGNC Symbol;Acc:HGNC:18333]	protein_coding	139.964	0.983562	0.396776	0.128859	0.229435	2.47888	0.0131794	0.176281	63.1605	114.924	92.0193	242.298	95.2075	180.587	191.549
C17orf49	ENSG00000258315	124944	chromosome 17 open reading frame 49 [Source:HGNC Symbol;Acc:HGNC:28737]	protein_coding	10.3342	4.28756	1.72902	0.0170218	0.130575	2.47976	0.0131469	0.176281	3.41408	0	0	33.9217	5.53532	1.02026	28.4479
ASPG	ENSG00000166183	374569	asparaginase [Source:HGNC Symbol;Acc:HGNC:20123]	protein_coding	7.04198	4.93516	1.99032	0.013787	0.130045	2.47958	0.0131536	0.176281	1.70704	0	0	30.2873	1.10706	1.02026	15.1722
PTPRH	ENSG00000080031	5794	protein tyrosine phosphatase receptor type H [Source:HGNC Symbol;Acc:HGNC:9672]	protein_coding	18.8325	-2.57514	1.03874	-0.0363886	0.136068	-2.47911	0.013171	0.176281	18.7774	52.3707	34.5633	9.69192	0	13.2634	3.16088
ANKRD33B	ENSG00000164236	651746	ankyrin repeat domain 33B [Source:HGNC Symbol;Acc:HGNC:35240]	protein_coding	151.453	-0.768565	0.309882	-0.32036	0.567282	-2.48019	0.0131313	0.176281	221.915	181.843	190.323	139.321	110.706	101.006	115.056
NOP53	ENSG00000105373	29997	NOP53 ribosome biogenesis factor [Source:HGNC Symbol;Acc:HGNC:4333]	protein_coding	2868.21	0.316152	0.127629	0.226819	0.133945	2.47713	0.0132445	0.176796	2710.78	2282.49	2565.77	2849.43	2944.79	3544.4	3179.84
CES2	ENSG00000172831	8824	carboxylesterase 2 [Source:HGNC Symbol;Acc:HGNC:1864]	protein_coding	726.901	-0.412396	0.166461	-0.27275	0.184731	-2.47743	0.0132332	0.176796	908.145	789.924	841.64	570.612	648.74	709.084	620.164
PIP5KL1	ENSG00000167103	138429	phosphatidylinositol-4-phosphate 5-kinase like 1 [Source:HGNC Symbol;Acc:HGNC:28711]	protein_coding	22.7904	3.26749	1.31978	0.021442	0.131429	2.47579	0.0132943	0.177284	1.70704	8.72844	0	1.21149	8.85652	53.0538	85.9758
PSMB7	ENSG00000136930	5695	proteasome 20S subunit beta 7 [Source:HGNC Symbol;Acc:HGNC:9544]	protein_coding	2998.77	0.39379	0.159083	0.263209	0.176327	2.47538	0.0133094	0.177308	3122.18	1952.26	2564.42	3827.1	3105.32	2997.54	3422.6
AIG1	ENSG00000146416	51390	androgen induced 1 [Source:HGNC Symbol;Acc:HGNC:21607]	protein_coding	1064.94	0.546918	0.22105	0.311933	0.283108	2.47418	0.0133543	0.177648	1184.69	513.523	837.151	1232.09	1205.59	1172.28	1309.23
MRPL54	ENSG00000183617	116541	mitochondrial ribosomal protein L54 [Source:HGNC Symbol;Acc:HGNC:16685]	protein_coding	674.885	0.511394	0.206739	0.302364	0.254871	2.47363	0.013375	0.177648	660.625	413.146	558.4	928.002	700.772	677.456	785.794
MDH2	ENSG00000146701	4191	malate dehydrogenase 2 [Source:HGNC Symbol;Acc:HGNC:6971]	protein_coding	4998.4	0.282074	0.114019	0.216796	0.117657	2.47392	0.0133641	0.177648	4347.83	4524.24	4491.89	4767.21	5278.48	6045.07	5534.06
TBC1D7	ENSG00000145979	51256	TBC1 domain family member 7 [Source:HGNC Symbol;Acc:HGNC:21066]	protein_coding	583.93	0.441936	0.178708	0.279937	0.206398	2.47295	0.0134002	0.177807	450.659	485.883	519.348	741.432	636.562	605.017	648.612
GOLGB1	ENSG00000173230	2804	golgin B1 [Source:HGNC Symbol;Acc:HGNC:4429]	protein_coding	1489.64	-0.340782	0.137955	-0.240271	0.145902	-2.47025	0.013502	0.178979	1560.23	1824.24	1688.22	1508.31	1295.27	1250.84	1300.38
SNX5	ENSG00000089006	27131	sorting nexin 5 [Source:HGNC Symbol;Acc:HGNC:14969]	protein_coding	3771.2	0.304898	0.123451	0.222605	0.128927	2.46979	0.0135191	0.179028	3484.07	3044.77	3455.88	4724.81	3845.94	3764.78	4078.16
CT45A10	ENSG00000269586	102723631	cancer/testis antigen family 45 member A10 [Source:HGNC Symbol;Acc:HGNC:51263]	protein_coding	353.984	0.587474	0.237934	0.314382	0.3224	2.46906	0.0135467	0.179037	266.298	269.127	290.871	535.479	347.618	355.052	413.443
DBI	ENSG00000155368	1622	diazepam binding inhibitor, acyl-CoA binding protein [Source:HGNC Symbol;Acc:HGNC:2690]	protein_coding	1484.65	0.382133	0.154754	0.256547	0.171001	2.46929	0.0135381	0.179037	1290.52	1125.97	1385.68	1876.6	1771.3	1375.32	1567.16
HAX1	ENSG00000143575	10456	HCLS1 associated protein X-1 [Source:HGNC Symbol;Acc:HGNC:16915]	protein_coding	2966.13	0.326017	0.132064	0.232762	0.140093	2.46864	0.0135628	0.179073	2840.51	2167.56	2776.74	3518.17	3305.69	3014.88	3139.38
CLPP	ENSG00000125656	8192	caseinolytic mitochondrial matrix peptidase proteolytic subunit [Source:HGNC Symbol;Acc:HGNC:2084]	protein_coding	1133.36	0.397237	0.161104	0.264019	0.179287	2.46571	0.0136742	0.18	1087.38	805.926	991.115	1287.81	1097.1	1386.54	1277.63
SUMO3	ENSG00000184900	6612	small ubiquitin like modifier 3 [Source:HGNC Symbol;Acc:HGNC:11124]	protein_coding	2588.6	0.339898	0.137824	0.241415	0.147241	2.46617	0.0136567	0.18	2620.31	1828.61	2304.52	2725.85	2865.08	2897.55	2878.29
	ENSG00000280987	9782	matrin 3 [Source:NCBI gene (formerly Entrezgene);Acc:9782]	protein_coding	20.9997	-3.56331	1.44532	-0.012514	0.129831	-2.46541	0.0136855	0.18	20.4845	52.3707	0	1.21149	1.10706	1.02026	70.8036
UPF1	ENSG00000005007	5976	UPF1 RNA helicase and ATPase [Source:HGNC Symbol;Acc:HGNC:9962]	protein_coding	1068.48	-0.397222	0.161144	-0.263862	0.17706	-2.46502	0.0137006	0.18	1049.83	1411.1	1249.22	850.466	1045.07	975.373	898.321
CFAP298	ENSG00000159079	56683	cilia and flagella associated protein 298 [Source:HGNC Symbol;Acc:HGNC:1301]	protein_coding	322.177	-0.571481	0.231806	-0.318667	0.296894	-2.46534	0.0136882	0.18	329.459	462.607	394.561	254.413	302.229	254.046	257.927
TMEM256	ENSG00000205544	254863	transmembrane protein 256 [Source:HGNC Symbol;Acc:HGNC:28618]	protein_coding	453.224	0.562382	0.228223	0.309551	0.299348	2.46417	0.013733	0.180234	397.74	299.677	373.912	644.513	531.391	391.782	533.556
RBFOX2	ENSG00000100320	23543	RNA binding fox-1 homolog 2 [Source:HGNC Symbol;Acc:HGNC:9906]	protein_coding	1845.47	-0.296362	0.120284	-0.218228	0.123954	-2.46385	0.0137455	0.180234	2045.03	2081.73	2062.13	1591.9	1796.77	1692.62	1648.08
TMEM208	ENSG00000168701	29100	transmembrane protein 208 [Source:HGNC Symbol;Acc:HGNC:25015]	protein_coding	570.153	0.577539	0.234643	0.311423	0.314063	2.46136	0.0138412	0.181246	578.687	308.405	451.119	804.43	612.207	550.943	685.278
GADD45GIP1	ENSG00000179271	90480	GADD45G interacting protein 1 [Source:HGNC Symbol;Acc:HGNC:29996]	protein_coding	2118.85	0.421678	0.171335	0.267773	0.195071	2.46113	0.0138499	0.181246	2115.02	1319.45	1897.84	2838.52	2302.69	2062.97	2295.43
TBC1D3G	ENSG00000260287	101060321	TBC1 domain family member 3G [Source:HGNC Symbol;Acc:HGNC:29860]	protein_coding	61.0914	-1.37257	0.558151	-0.0819972	0.166168	-2.45913	0.0139273	0.181902	112.665	72.737	96.0591	13.3264	42.0685	59.1753	31.6088
ADCY1	ENSG00000164742	107	adenylate cyclase 1 [Source:HGNC Symbol;Acc:HGNC:232]	protein_coding	524.368	-0.485372	0.19737	-0.29472	0.23244	-2.4592	0.0139246	0.181902	503.577	744.827	627.975	451.886	459.432	452.997	429.879
SAT1	ENSG00000130066	6303	spermidine/spermine N1-acetyltransferase 1 [Source:HGNC Symbol;Acc:HGNC:10540]	protein_coding	874.718	0.464679	0.189032	0.288648	0.223071	2.4582	0.0139636	0.182152	829.621	589.17	740.643	1173.93	1005.21	785.604	998.837
ZNF330	ENSG00000109445	27309	zinc finger protein 330 [Source:HGNC Symbol;Acc:HGNC:15462]	protein_coding	839.973	0.396627	0.161369	0.263159	0.179489	2.45789	0.0139756	0.182152	628.191	768.103	740.643	881.965	1032.89	883.549	944.47
HSD17B10	ENSG00000072506	3028	hydroxysteroid 17-beta dehydrogenase 10 [Source:HGNC Symbol;Acc:HGNC:4800]	protein_coding	2480.13	0.361264	0.147	0.247227	0.159171	2.45758	0.0139875	0.182152	2562.27	1670.04	2177.04	2802.18	2662.49	2712.88	2773.98
PSRC1	ENSG00000134222	84722	proline and serine rich coiled-coil 1 [Source:HGNC Symbol;Acc:HGNC:24472]	protein_coding	575.777	0.524023	0.213366	0.302945	0.266869	2.45598	0.01405	0.182787	462.608	458.243	464.136	459.155	699.665	793.766	692.864
TNK2	ENSG00000061938	10188	tyrosine kinase non receptor 2 [Source:HGNC Symbol;Acc:HGNC:19297]	protein_coding	214.43	-0.668662	0.272327	-0.322991	0.401748	-2.45536	0.0140742	0.182924	230.45	315.679	268.876	145.379	189.308	185.688	165.63
AVIL	ENSG00000135407	10677	advillin [Source:HGNC Symbol;Acc:HGNC:14188]	protein_coding	29.5761	-2.28377	0.930651	-0.0404587	0.137673	-2.45395	0.0141295	0.183285	20.4845	82.9202	55.2116	36.3447	3.32119	3.06079	5.68958
TRIM44	ENSG00000166326	54765	tripartite motif containing 44 [Source:HGNC Symbol;Acc:HGNC:19016]	protein_coding	888.448	-0.391821	0.159663	-0.260838	0.174675	-2.45405	0.0141259	0.183285	1082.26	974.676	1025.23	818.968	676.416	875.387	766.196
CARMIL1	ENSG00000079691	55604	capping protein regulator and myosin 1 linker 1 [Source:HGNC Symbol;Acc:HGNC:21581]	protein_coding	251.533	-0.683007	0.278415	-0.317935	0.423415	-2.4532	0.0141592	0.183491	384.084	258.944	317.354	172.032	264.588	173.445	190.285
AKAP13	ENSG00000170776	11214	A-kinase anchoring protein 13 [Source:HGNC Symbol;Acc:HGNC:371]	protein_coding	494.733	-0.476095	0.194209	-0.290756	0.226961	-2.45145	0.0142281	0.184204	496.749	680.819	587.577	433.714	442.826	411.167	410.282
PRSS27	ENSG00000172382	83886	serine protease 27 [Source:HGNC Symbol;Acc:HGNC:15475]	protein_coding	68.0202	-1.44386	0.589502	-0.0750654	0.159789	-2.4493	0.0143136	0.185131	179.239	32.0043	105.934	25.4413	58.6744	43.8714	30.9766
DNASE2	ENSG00000105612	1777	deoxyribonuclease 2, lysosomal [Source:HGNC Symbol;Acc:HGNC:2960]	protein_coding	526.357	0.498919	0.203742	0.2932	0.248597	2.44878	0.0143341	0.185217	477.971	362.23	440.795	480.962	659.81	648.888	613.842
RMDN1	ENSG00000176623	51115	regulator of microtubule dynamics 1 [Source:HGNC Symbol;Acc:HGNC:24285]	protein_coding	436.377	0.484544	0.198025	0.287624	0.238721	2.44688	0.0144098	0.185248	349.943	333.136	384.685	559.709	482.68	457.079	487.407
KCTD3	ENSG00000136636	51133	potassium channel tetramerization domain containing 3 [Source:HGNC Symbol;Acc:HGNC:21305]	protein_coding	899.945	0.373834	0.152739	0.248474	0.167052	2.44753	0.0143837	0.185248	761.34	728.825	822.787	1102.46	935.47	968.231	980.504
H2AJ	ENSG00000246705	55766	H2A.J histone [Source:HGNC Symbol;Acc:HGNC:14456]	protein_coding	345.021	0.79105	0.323287	0.217091	0.467323	2.44689	0.0144094	0.185248	341.408	155.657	235.21	625.129	302.229	300.978	454.534
BCAR3	ENSG00000137936	8412	BCAR3 adaptor protein, NSP family member [Source:HGNC Symbol;Acc:HGNC:973]	protein_coding	94.3244	1.03544	0.423212	0.112235	0.20186	2.44663	0.0144199	0.185248	34.1408	77.1012	66.8823	102.977	104.064	144.878	130.228
HIPK2	ENSG00000064393	28996	homeodomain interacting protein kinase 2 [Source:HGNC Symbol;Acc:HGNC:14402]	protein_coding	690.214	-0.42404	0.173287	-0.282829	0.195178	-2.44704	0.0144037	0.185248	742.562	869.935	807.525	548.805	699.665	579.51	583.498
PTCH1	ENSG00000185920	5727	patched 1 [Source:HGNC Symbol;Acc:HGNC:9585]	protein_coding	202.496	-0.672381	0.274736	-0.318233	0.40958	-2.44737	0.0143901	0.185248	232.157	286.584	251.819	167.186	185.987	135.695	158.044
CAMKK2	ENSG00000110931	10645	calcium/calmodulin dependent protein kinase kinase 2 [Source:HGNC Symbol;Acc:HGNC:1470]	protein_coding	740.303	-0.459248	0.187787	-0.282993	0.216658	-2.44558	0.0144621	0.185611	874.005	867.025	886.078	540.325	583.423	824.374	606.888
BTNL9	ENSG00000165810	153579	butyrophilin like 9 [Source:HGNC Symbol;Acc:HGNC:24176]	protein_coding	238.986	-0.80579	0.329539	-0.228072	0.492872	-2.44521	0.014477	0.185623	163.876	453.879	327.23	198.684	191.522	176.506	161.205
MT-CO3	ENSG00000198938	4514	mitochondrially encoded cytochrome c oxidase III [Source:HGNC Symbol;Acc:HGNC:7422]	protein_coding	130071	0.321008	0.131354	0.227352	0.139336	2.44384	0.0145319	0.186128	128509	87437.2	126407	152947	143470	139598	132131
SDHAF4	ENSG00000154079	135154	succinate dehydrogenase complex assembly factor 4 [Source:HGNC Symbol;Acc:HGNC:20957]	protein_coding	144.921	0.802778	0.328532	0.193858	0.380493	2.44353	0.0145443	0.186128	116.079	81.4655	109.525	182.935	197.057	137.736	189.653
RXRG	ENSG00000143171	6258	retinoid X receptor gamma [Source:HGNC Symbol;Acc:HGNC:10479]	protein_coding	24.6858	2.21805	0.908236	0.0386987	0.136995	2.44215	0.0146002	0.186664	15.3634	0	8.97749	25.4413	34.319	52.0335	36.6662
RPUSD1	ENSG00000007376	113000	RNA pseudouridine synthase domain containing 1 [Source:HGNC Symbol;Acc:HGNC:14173]	protein_coding	602.464	0.47589	0.194966	0.28687	0.233435	2.44088	0.0146513	0.186959	566.737	400.054	513.961	739.009	581.209	728.469	687.807
RASGRP1	ENSG00000172575	10125	RAS guanyl releasing protein 1 [Source:HGNC Symbol;Acc:HGNC:9878]	protein_coding	25.2343	3.08554	1.26399	0.0219925	0.131522	2.44111	0.0146423	0.186959	1.70704	10.1832	0	1.21149	19.9272	41.8308	101.78
CD82	ENSG00000085117	3732	CD82 molecule [Source:HGNC Symbol;Acc:HGNC:6210]	protein_coding	39.4586	-1.68551	0.690749	-0.0614575	0.149357	-2.44012	0.0146824	0.187176	87.059	46.5517	60.1492	18.1724	6.64239	41.8308	15.8044
POLRMT	ENSG00000099821	5442	RNA polymerase mitochondrial [Source:HGNC Symbol;Acc:HGNC:9200]	protein_coding	1064.89	0.3648	0.14955	0.247641	0.163091	2.43932	0.014715	0.187412	810.844	938.308	997.848	1106.09	1262.05	1210.03	1129.06
BRI3BP	ENSG00000184992	140707	BRI3 binding protein [Source:HGNC Symbol;Acc:HGNC:14251]	protein_coding	1028.78	-0.415922	0.170617	-0.266817	0.190074	-2.43776	0.0147787	0.188044	1403.19	987.769	1207.92	789.892	933.255	1012.1	867.344
APBA3	ENSG00000011132	9546	amyloid beta precursor protein binding family A member 3 [Source:HGNC Symbol;Acc:HGNC:580]	protein_coding	204.16	0.958858	0.393571	0.126066	0.223332	2.4363	0.0148382	0.188596	168.997	106.196	124.338	199.896	119.563	419.329	290.801
UTRN	ENSG00000152818	7402	utrophin [Source:HGNC Symbol;Acc:HGNC:12635]	protein_coding	557.782	-0.528486	0.216948	-0.299457	0.267296	-2.43601	0.0148504	0.188596	600.878	736.099	688.125	397.369	635.455	404.025	442.523
GCSH	ENSG00000140905	2653	glycine cleavage system protein H [Source:HGNC Symbol;Acc:HGNC:4208]	protein_coding	486.974	0.570503	0.234621	0.298985	0.313643	2.43159	0.0150326	0.189465	476.264	279.31	390.521	660.262	588.958	440.754	572.751
AMER2	ENSG00000165566	219287	APC membrane recruitment protein 2 [Source:HGNC Symbol;Acc:HGNC:26360]	protein_coding	8.46964	4.17325	1.71602	0.017925	0.130747	2.43193	0.0150187	0.189465	1.70704	1.45474	0	30.2873	7.74945	1.02026	17.0687
TCEA3	ENSG00000204219	6920	transcription elongation factor A3 [Source:HGNC Symbol;Acc:HGNC:11615]	protein_coding	11.6719	3.89983	1.60368	0.0176998	0.130684	2.4318	0.0150241	0.189465	1.70704	2.90948	0	1.21149	40.9614	2.04053	32.8731
SLCO2A1	ENSG00000174640	6578	solute carrier organic anion transporter family member 2A1 [Source:HGNC Symbol;Acc:HGNC:10955]	protein_coding	11.8878	3.97614	1.63471	0.0171475	0.130588	2.43233	0.0150021	0.189465	1.70704	2.90948	0	1.21149	45.3896	1.02026	30.9766
TRIM39	ENSG00000204599	56658	tripartite motif containing 39 [Source:HGNC Symbol;Acc:HGNC:10065]	protein_coding	94.599	-0.929165	0.381982	-0.151707	0.273187	-2.43249	0.0149956	0.189465	146.805	117.834	124.787	54.5171	73.0663	77.5401	67.6427
YAP1	ENSG00000137693	10413	Yes1 associated transcriptional regulator [Source:HGNC Symbol;Acc:HGNC:16262]	protein_coding	601.019	-0.402147	0.165338	-0.26216	0.182187	-2.43227	0.0150043	0.189465	701.593	705.549	685.431	539.113	516.999	535.639	522.809
ADD1	ENSG00000087274	118	adducin 1 [Source:HGNC Symbol;Acc:HGNC:243]	protein_coding	1183.84	-0.462259	0.190029	-0.281884	0.220478	-2.43256	0.0149924	0.189465	1090.8	1659.86	1452.11	835.928	1017.39	1287.57	943.205
TICRR	ENSG00000140534	90381	TOPBP1 interacting checkpoint and replication regulator [Source:HGNC Symbol;Acc:HGNC:28704]	protein_coding	587.817	-0.473184	0.194539	-0.285403	0.227295	-2.43234	0.0150016	0.189465	643.554	747.737	704.284	402.215	550.211	585.632	481.085
NAA38	ENSG00000183011	84316	N-alpha-acetyltransferase 38, NatC auxiliary subunit [Source:HGNC Symbol;Acc:HGNC:28212]	protein_coding	1374.23	0.424007	0.174417	0.266871	0.198511	2.431	0.0150572	0.189537	1360.51	923.76	1169.77	1866.91	1391.58	1343.69	1563.37
ABCC5	ENSG00000114770	10057	ATP binding cassette subfamily C member 5 [Source:HGNC Symbol;Acc:HGNC:56]	protein_coding	592.488	-0.421289	0.173315	-0.269534	0.193947	-2.43077	0.0150668	0.189537	626.484	763.739	684.534	535.479	508.143	526.456	502.579
SOCS2	ENSG00000120833	8835	suppressor of cytokine signaling 2 [Source:HGNC Symbol;Acc:HGNC:19382]	protein_coding	201.25	0.67998	0.279839	0.283062	0.446911	2.4299	0.0151032	0.189637	168.997	128.017	154.862	225.337	201.486	268.33	261.721
NDUFB11	ENSG00000147123	54539	NADH:ubiquinone oxidoreductase subunit B11 [Source:HGNC Symbol;Acc:HGNC:20372]	protein_coding	3019.19	0.371397	0.152826	0.245731	0.168582	2.4302	0.0150906	0.189637	2685.17	2105.01	2987.71	4037.9	3280.23	3042.43	2995.88
GTF3C6	ENSG00000155115	112495	general transcription factor IIIC subunit 6 [Source:HGNC Symbol;Acc:HGNC:20872]	protein_coding	843.04	0.432718	0.178127	0.270273	0.204584	2.42927	0.0151293	0.189786	797.188	580.441	733.91	1081.86	948.754	812.131	946.998
HINT1	ENSG00000169567	3094	histidine triad nucleotide binding protein 1 [Source:HGNC Symbol;Acc:HGNC:4912]	protein_coding	3640.32	0.364926	0.150263	0.245429	0.163502	2.42858	0.0151583	0.18997	3554.06	2567.62	3269.15	4673.93	4181.38	3267.91	3968.16
RHOA	ENSG00000067560	387	ras homolog family member A [Source:HGNC Symbol;Acc:HGNC:667]	protein_coding	10415.9	0.258678	0.106635	0.1934	0.108164	2.42583	0.0152735	0.190876	10028.9	8491.32	9606.81	11445	10210.5	11887.1	11242
DHRS2	ENSG00000100867	10202	dehydrogenase/reductase 2 [Source:HGNC Symbol;Acc:HGNC:18349]	protein_coding	92.4538	0.984771	0.405938	0.117651	0.209024	2.42591	0.0152699	0.190876	49.5042	62.5538	66.4334	152.648	89.6722	108.148	118.217
LURAP1	ENSG00000171357	541468	leucine rich adaptor protein 1 [Source:HGNC Symbol;Acc:HGNC:32327]	protein_coding	38.3778	1.48383	0.611646	0.0648274	0.151613	2.42597	0.0152677	0.190876	22.1915	11.6379	24.2392	47.2481	43.1755	63.2564	56.8958
DDX54	ENSG00000123064	79039	DEAD-box helicase 54 [Source:HGNC Symbol;Acc:HGNC:20084]	protein_coding	1660.55	0.366767	0.151425	0.242655	0.164186	2.4221	0.0154312	0.192306	1584.13	1255.44	1442.68	1674.28	1624.06	2156.84	1886.41
RPS6	ENSG00000137154	6194	ribosomal protein S6 [Source:HGNC Symbol;Acc:HGNC:10429]	protein_coding	33681	0.300831	0.124202	0.217473	0.129194	2.4221	0.015431	0.192306	31146.7	27875.7	30291.8	44568.3	32742.5	32160.8	36981
CLUL1	ENSG00000079101	27098	clusterin like 1 [Source:HGNC Symbol;Acc:HGNC:2096]	protein_coding	9.4667	4.29666	1.7739	0.0163919	0.130464	2.42215	0.015429	0.192306	1.70704	1.45474	0	1.21149	38.7473	1.02026	22.1261
CAV2	ENSG00000105971	858	caveolin 2 [Source:HGNC Symbol;Acc:HGNC:1528]	protein_coding	217.319	0.702607	0.290152	0.226909	0.413198	2.42151	0.015456	0.192434	160.462	122.198	199.3	248.356	315.513	250.985	224.422
BUD13	ENSG00000137656	84811	BUD13 homolog [Source:HGNC Symbol;Acc:HGNC:28199]	protein_coding	455.56	0.62921	0.260178	0.291132	0.381884	2.41839	0.0155895	0.193735	302.146	391.325	350.122	668.743	588.958	314.241	573.383
ZC3H4	ENSG00000130749	23211	zinc finger CCCH-type containing 4 [Source:HGNC Symbol;Acc:HGNC:17808]	protein_coding	474.254	-0.478539	0.197856	-0.284381	0.232289	-2.41862	0.0155795	0.193735	573.565	562.985	557.502	399.792	348.725	484.626	392.581
SRI	ENSG00000075142	6717	sorcin [Source:HGNC Symbol;Acc:HGNC:11292]	protein_coding	1290.35	0.412412	0.170619	0.260831	0.192269	2.41716	0.0156423	0.194029	1237.6	917.941	1105.13	1656.11	1135.85	1509.99	1469.81
CACHD1	ENSG00000158966	57685	cache domain containing 1 [Source:HGNC Symbol;Acc:HGNC:29314]	protein_coding	424.4	-0.491257	0.203235	-0.287119	0.241474	-2.41719	0.0156409	0.194029	462.608	555.711	504.086	314.988	398.543	384.64	350.225
LTBP2	ENSG00000119681	4053	latent transforming growth factor beta binding protein 2 [Source:HGNC Symbol;Acc:HGNC:6715]	protein_coding	92.3039	-0.960263	0.397462	-0.137461	0.242984	-2.41599	0.0156926	0.194471	116.079	144.019	122.543	65.4205	85.244	48.9727	63.8497
CNOT3	ENSG00000088038	4849	CCR4-NOT transcription complex subunit 3 [Source:HGNC Symbol;Acc:HGNC:7879]	protein_coding	685.016	-0.525154	0.217489	-0.281482	0.266565	-2.41462	0.0157518	0.195024	640.14	987.769	855.106	440.983	617.742	722.347	531.027
DENND4B	ENSG00000198837	9909	DENN domain containing 4B [Source:HGNC Symbol;Acc:HGNC:29044]	protein_coding	700.567	-0.406224	0.168265	-0.260603	0.186144	-2.41419	0.0157702	0.19507	781.824	848.114	811.565	598.476	560.175	707.043	596.773
ENDOG	ENSG00000167136	2021	endonuclease G [Source:HGNC Symbol;Acc:HGNC:3346]	protein_coding	462.433	0.481609	0.199621	0.279009	0.240602	2.41262	0.0158382	0.19513	401.154	327.317	404.885	599.688	494.858	490.747	518.384
RNF113A	ENSG00000125352	7737	ring finger protein 113A [Source:HGNC Symbol;Acc:HGNC:12974]	protein_coding	687.944	0.410242	0.170104	0.259775	0.191608	2.41172	0.0158776	0.19513	626.484	503.34	611.367	729.317	750.59	826.414	768.093
KCNIP3	ENSG00000115041	30818	potassium voltage-gated channel interacting protein 3 [Source:HGNC Symbol;Acc:HGNC:15523]	protein_coding	35.7449	-1.55715	0.645655	-0.067132	0.153362	-2.41174	0.0158767	0.19513	87.059	30.5496	54.3138	18.1724	25.4625	16.3242	18.3331
EIF3A	ENSG00000107581	8661	eukaryotic translation initiation factor 3 subunit A [Source:HGNC Symbol;Acc:HGNC:3271]	protein_coding	4707.34	-0.268292	0.111188	-0.200726	0.112785	-2.41296	0.0158234	0.19513	4795.08	5587.66	5242.41	4675.14	4391.72	4040.25	4219.14
CALCOCO2	ENSG00000136436	10241	calcium binding and coiled-coil domain 2 [Source:HGNC Symbol;Acc:HGNC:29912]	protein_coding	1330.73	-0.314668	0.130457	-0.223055	0.13567	-2.41205	0.015863	0.19513	1457.81	1539.12	1494.75	1289.03	1161.31	1189.63	1183.43
MARCHF6	ENSG00000145495	10299	membrane associated ring-CH-type finger 6 [Source:HGNC Symbol;Acc:HGNC:30550]	protein_coding	1433.96	-0.330458	0.136934	-0.229795	0.143807	-2.41327	0.0158102	0.19513	1445.86	1783.51	1636.6	1274.49	1379.4	1266.15	1251.71
ZNF641	ENSG00000167528	121274	zinc finger protein 641 [Source:HGNC Symbol;Acc:HGNC:31834]	protein_coding	376.347	-0.567799	0.235275	-0.299881	0.303621	-2.41334	0.015807	0.19513	553.081	375.323	456.505	347.698	350.939	249.965	300.915
AGAP9	ENSG00000204172	642517	ArfGAP with GTPase domain, ankyrin repeat and PH domain 9 [Source:HGNC Symbol;Acc:HGNC:23463]	protein_coding	343.461	-0.554018	0.229923	-0.296772	0.291913	-2.40958	0.0159711	0.196098	483.092	362.23	413.413	256.836	343.19	267.309	278.157
TIMM13	ENSG00000099800	26517	translocase of inner mitochondrial membrane 13 [Source:HGNC Symbol;Acc:HGNC:11816]	protein_coding	1549.8	0.471312	0.1958	0.276962	0.232984	2.40711	0.0160794	0.196885	1700.21	862.661	1252.36	1899.62	1504.5	1781.38	1847.85
NFYC	ENSG00000066136	4802	nuclear transcription factor Y subunit gamma [Source:HGNC Symbol;Acc:HGNC:7806]	protein_coding	627.081	0.451008	0.187343	0.271198	0.218939	2.40739	0.0160668	0.196885	605.999	408.782	544.036	706.299	716.271	698.881	709.301
RAMP2	ENSG00000131477	10266	receptor activity modifying protein 2 [Source:HGNC Symbol;Acc:HGNC:9844]	protein_coding	63.6186	1.14181	0.474297	0.0903291	0.173926	2.40738	0.0160673	0.196885	40.969	29.0948	43.5408	102.977	68.638	78.5604	81.5506
MED10	ENSG00000133398	84246	mediator complex subunit 10 [Source:HGNC Symbol;Acc:HGNC:28760]	protein_coding	424.075	0.541373	0.22506	0.287876	0.29074	2.40546	0.0161523	0.197364	399.447	258.944	353.713	570.612	458.325	435.653	491.832
IQCB1	ENSG00000173226	9657	IQ motif containing B1 [Source:HGNC Symbol;Acc:HGNC:28949]	protein_coding	788.26	0.522118	0.217061	0.286318	0.27321	2.4054	0.016155	0.197364	698.179	567.349	631.118	913.464	1164.63	594.814	948.263
NDUFS3	ENSG00000213619	4722	NADH:ubiquinone oxidoreductase core subunit S3 [Source:HGNC Symbol;Acc:HGNC:7710]	protein_coding	1338.17	0.368793	0.153331	0.244578	0.167112	2.40521	0.0161631	0.197364	1297.35	961.583	1188.17	1605.22	1316.3	1516.11	1482.45
BAD	ENSG00000002330	572	BCL2 associated agonist of cell death [Source:HGNC Symbol;Acc:HGNC:936]	protein_coding	620.555	0.452253	0.188182	0.267381	0.219948	2.40328	0.0162487	0.198093	583.808	418.965	538.201	734.163	749.483	621.341	697.921
RPRD1B	ENSG00000101413	58490	regulation of nuclear pre-mRNA domain containing 1B [Source:HGNC Symbol;Acc:HGNC:16209]	protein_coding	477.433	-0.476493	0.198302	-0.280153	0.232723	-2.40286	0.0162674	0.198093	491.628	644.45	567.377	367.082	448.361	430.552	392.581
IFT172	ENSG00000138002	26160	intraflagellar transport 172 [Source:HGNC Symbol;Acc:HGNC:30391]	protein_coding	399.744	-0.608095	0.253064	-0.293805	0.345674	-2.40293	0.0162643	0.198093	339.701	638.631	509.921	368.293	366.438	272.411	302.812
TSPEAR	ENSG00000175894	54084	thrombospondin type laminin G domain and EAR repeats [Source:HGNC Symbol;Acc:HGNC:1268]	protein_coding	9.77087	-3.58106	1.49181	-0.01978	0.131009	-2.40047	0.016374	0.198665	1.70704	26.1853	32.319	6.05745	1.10706	1.02026	0
NMNAT1	ENSG00000173614	64802	nicotinamide nucleotide adenylyltransferase 1 [Source:HGNC Symbol;Acc:HGNC:17877]	protein_coding	132.024	-1.05256	0.438424	-0.111778	0.200222	-2.40077	0.0163604	0.198665	95.5942	267.672	196.607	102.977	50.925	132.634	77.7576
PI4KA	ENSG00000241973	5297	phosphatidylinositol 4-kinase alpha [Source:HGNC Symbol;Acc:HGNC:8983]	protein_coding	1096.76	-0.393051	0.163709	-0.255468	0.179761	-2.40092	0.016354	0.198665	1090.8	1421.28	1291.86	833.505	1103.74	1013.12	922.976
CDK5RAP2	ENSG00000136861	55755	CDK5 regulatory subunit associated protein 2 [Source:HGNC Symbol;Acc:HGNC:18672]	protein_coding	1166.97	-0.444515	0.185178	-0.270102	0.211632	-2.40047	0.0163739	0.198665	1121.53	1584.21	1412.16	878.331	1311.87	916.198	944.47
HSP90B1	ENSG00000166598	7184	heat shock protein 90 beta family member 1 [Source:HGNC Symbol;Acc:HGNC:12028]	protein_coding	6437.75	-0.268422	0.111884	-0.199663	0.113438	-2.39911	0.0164352	0.199226	6809.38	7347.89	7216.11	5966.59	6670.06	5303.34	5750.9
ERGIC2	ENSG00000087502	51290	ERGIC and golgi 2 [Source:HGNC Symbol;Acc:HGNC:30208]	protein_coding	1119.42	0.502268	0.209409	0.281142	0.257855	2.39851	0.0164621	0.199371	1119.82	701.185	895.056	1691.24	1121.46	981.494	1325.67
UIMC1	ENSG00000087206	51720	ubiquitin interaction motif containing 1 [Source:HGNC Symbol;Acc:HGNC:30298]	protein_coding	755.705	0.378619	0.157934	0.244976	0.173229	2.39732	0.0165156	0.199837	636.726	619.719	682.289	781.411	835.834	898.853	835.103
BLOC1S5	ENSG00000188428	63915	biogenesis of lysosomal organelles complex 1 subunit 5 [Source:HGNC Symbol;Acc:HGNC:18561]	protein_coding	394.717	-0.577757	0.241083	-0.292765	0.315908	-2.39651	0.0165522	0.200099	508.698	461.153	486.58	422.81	229.162	344.849	309.766
WASF2	ENSG00000158195	10163	WASP family member 2 [Source:HGNC Symbol;Acc:HGNC:12733]	protein_coding	1546.51	-0.359095	0.149887	-0.240034	0.160427	-2.39577	0.0165856	0.20032	1599.5	1898.44	1803.13	1166.67	1450.25	1592.63	1314.92
RPS27	ENSG00000177954	6232	ribosomal protein S27 [Source:HGNC Symbol;Acc:HGNC:10416]	protein_coding	12284	0.323994	0.135277	0.21833	0.142875	2.39505	0.0166182	0.200532	10305.4	10184.6	11789.2	15553.1	14892.2	10624	12639.1
PRDX3	ENSG00000165672	10935	peroxiredoxin 3 [Source:HGNC Symbol;Acc:HGNC:9354]	protein_coding	2940.69	0.357642	0.149404	0.239149	0.161386	2.39379	0.0166755	0.201042	2726.14	2302.85	2580.13	4028.21	2983.54	2674.11	3289.84
PPIA	ENSG00000196262	5478	peptidylprolyl isomerase A [Source:HGNC Symbol;Acc:HGNC:9253]	protein_coding	22126.2	0.281457	0.11766	0.207957	0.121527	2.39212	0.0167513	0.201772	21017.1	17010.3	21171.6	27160.4	23779.7	21780.6	22963.8
RAP2B	ENSG00000181467	5912	RAP2B, member of RAS oncogene family [Source:HGNC Symbol;Acc:HGNC:9862]	protein_coding	455.548	0.584495	0.244637	0.283504	0.335619	2.38923	0.0168835	0.202087	476.264	228.394	362.242	551.228	507.036	511.153	552.521
RND3	ENSG00000115963	390	Rho family GTPase 3 [Source:HGNC Symbol;Acc:HGNC:671]	protein_coding	421.094	0.566746	0.237172	0.282944	0.31641	2.3896	0.0168666	0.202087	259.47	392.78	340.247	598.476	379.723	469.322	507.637
AIP	ENSG00000110711	9049	aryl hydrocarbon receptor interacting protein [Source:HGNC Symbol;Acc:HGNC:358]	protein_coding	1180.76	0.339773	0.142191	0.231242	0.151725	2.38955	0.016869	0.202087	916.681	1082.33	1079.99	1279.33	1235.48	1387.56	1283.95
PIWIL2	ENSG00000197181	55124	piwi like RNA-mediated gene silencing 2 [Source:HGNC Symbol;Acc:HGNC:17644]	protein_coding	7.62898	-4.39942	1.84102	-0.0161408	0.130399	-2.38967	0.0168637	0.202087	30.7267	0	18.4039	1.21149	0	3.06079	0
ZNF24	ENSG00000172466	7572	zinc finger protein 24 [Source:HGNC Symbol;Acc:HGNC:13032]	protein_coding	1930.75	-0.290213	0.12141	-0.208013	0.124195	-2.39035	0.0168324	0.202087	2111.61	2195.2	2153.25	1825.72	1873.15	1627.32	1729
FAM120A	ENSG00000048828	23196	family with sequence similarity 120A [Source:HGNC Symbol;Acc:HGNC:13247]	protein_coding	1617.16	-0.314104	0.131446	-0.221396	0.136666	-2.38961	0.0168663	0.202087	1640.47	1985.72	1829.61	1493.77	1408.19	1540.6	1421.76
SAV1	ENSG00000151748	60485	salvador family WW domain containing protein 1 [Source:HGNC Symbol;Acc:HGNC:17795]	protein_coding	746.442	-0.38162	0.159703	-0.248506	0.173448	-2.38956	0.0168688	0.202087	891.075	836.476	852.413	623.918	736.198	637.665	647.347
STAT4	ENSG00000138378	6775	signal transducer and activator of transcription 4 [Source:HGNC Symbol;Acc:HGNC:11365]	protein_coding	53.29	-1.16058	0.486095	-0.0972475	0.181747	-2.38755	0.0169609	0.202625	81.9379	78.556	73.1665	35.1332	32.1049	36.7295	35.4018
SLC5A3	ENSG00000198743	6526	solute carrier family 5 member 3 [Source:HGNC Symbol;Acc:HGNC:11038]	protein_coding	784.406	-0.385339	0.161403	-0.249541	0.175728	-2.38744	0.0169662	0.202625	938.872	881.573	893.709	795.949	646.526	653.99	680.221
SLC26A2	ENSG00000155850	1836	solute carrier family 26 member 2 [Source:HGNC Symbol;Acc:HGNC:10994]	protein_coding	580.297	-0.428084	0.17932	-0.263565	0.201822	-2.38727	0.0169742	0.202625	641.847	718.642	677.352	488.231	580.102	462.18	493.729
TMEM38A	ENSG00000072954	79041	transmembrane protein 38A [Source:HGNC Symbol;Acc:HGNC:28462]	protein_coding	174.679	-0.730358	0.306036	-0.240766	0.45092	-2.38651	0.0170091	0.20286	168.997	283.674	223.54	151.436	125.098	139.776	130.228
KCNMB3	ENSG00000171121	27094	potassium calcium-activated channel subfamily M regulatory beta subunit 3 [Source:HGNC Symbol;Acc:HGNC:6287]	protein_coding	15.2332	2.38973	1.00294	0.0348541	0.135447	2.38272	0.0171851	0.204744	3.41408	4.36422	5.83537	12.1149	37.6402	17.3445	25.9192
RAB5B	ENSG00000111540	5869	RAB5B, member RAS oncogene family [Source:HGNC Symbol;Acc:HGNC:9784]	protein_coding	1195.38	-0.313322	0.131512	-0.220058	0.136528	-2.38245	0.0171977	0.204744	1369.05	1326.72	1338.09	1092.76	1112.6	1060.05	1068.38
GPN1	ENSG00000198522	11321	GPN-loop GTPase 1 [Source:HGNC Symbol;Acc:HGNC:17030]	protein_coding	590.661	0.447948	0.188084	0.268845	0.220449	2.38164	0.0172357	0.204886	498.456	436.422	534.161	740.221	718.485	565.227	641.658
PROCR	ENSG00000101000	10544	protein C receptor [Source:HGNC Symbol;Acc:HGNC:9452]	protein_coding	1539.38	0.406078	0.17058	0.253161	0.192178	2.38058	0.0172855	0.204886	1510.73	996.497	1394.2	1693.66	2019.29	1501.83	1659.46
UBE2I	ENSG00000103275	7329	ubiquitin conjugating enzyme E2 I [Source:HGNC Symbol;Acc:HGNC:12485]	protein_coding	2087.22	0.310249	0.130313	0.218473	0.136205	2.38079	0.0172755	0.204886	1992.12	1636.58	1886.62	2100.72	2208.59	2490.47	2295.43
TUBB	ENSG00000196230	203068	tubulin beta class I [Source:HGNC Symbol;Acc:HGNC:20778]	protein_coding	14858.8	0.237003	0.0995412	0.181736	0.100246	2.38096	0.0172677	0.204886	12411.9	13444.7	14660.7	15881.4	16389	16148.7	15074.9
KIF1B	ENSG00000054523	23095	kinesin family member 1B [Source:HGNC Symbol;Acc:HGNC:16636]	protein_coding	1090.17	-0.368521	0.154805	-0.242594	0.16673	-2.38056	0.0172866	0.204886	1060.07	1422.74	1266.28	946.174	1043.96	957.008	934.987
MYL6	ENSG00000092841	4637	myosin light chain 6 [Source:HGNC Symbol;Acc:HGNC:7587]	protein_coding	4732.32	0.33273	0.13979	0.230338	0.149107	2.38021	0.0173029	0.204897	4615.84	3392.45	4373.83	6099.85	4995.08	4604.45	5044.76
CWC25	ENSG00000273559	54883	CWC25 spliceosome associated protein homolog [Source:HGNC Symbol;Acc:HGNC:25989]	protein_coding	309.96	-0.531197	0.223247	-0.284531	0.276892	-2.37942	0.0173399	0.205153	419.932	341.864	365.833	278.643	243.554	263.228	256.663
CKLF-CMTM1	ENSG00000254788	100529251	CKLF-CMTM1 readthrough [Source:HGNC Symbol;Acc:HGNC:39977]	protein_coding	9.27766	4.12134	1.73258	0.0167212	0.130501	2.37873	0.0173725	0.205354	1.70704	1.45474	0	2.42298	29.8907	1.02026	28.4479
FAT3	ENSG00000165323	120114	FAT atypical cadherin 3 [Source:HGNC Symbol;Acc:HGNC:23112]	protein_coding	20.6327	-2.4446	1.02783	-0.0350093	0.13544	-2.37841	0.0173877	0.205354	66.5746	7.2737	39.9498	16.9609	8.85652	1.02026	3.79305
PPIH	ENSG00000171960	10465	peptidylprolyl isomerase H [Source:HGNC Symbol;Acc:HGNC:14651]	protein_coding	1105.32	0.46722	0.196633	0.261944	0.236261	2.3761	0.0174967	0.20539	1041.29	628.448	1059.34	1453.79	1309.66	1131.47	1113.26
MTX1	ENSG00000173171	4580	metaxin 1 [Source:HGNC Symbol;Acc:HGNC:7504]	protein_coding	1262.41	0.373637	0.15722	0.243195	0.172074	2.37653	0.0174765	0.20539	1222.24	899.03	1123.53	1579.78	1318.51	1299.82	1393.95
TMEM150A	ENSG00000168890	129303	transmembrane protein 150A [Source:HGNC Symbol;Acc:HGNC:24677]	protein_coding	26.7707	2.13926	0.900325	0.0373848	0.136381	2.3761	0.0174969	0.20539	22.1915	1.45474	4.93762	20.5953	26.5695	59.1753	52.4705
MTTP	ENSG00000138823	4547	microsomal triglyceride transfer protein [Source:HGNC Symbol;Acc:HGNC:7467]	protein_coding	10.4252	4.0275	1.69374	0.0166343	0.130464	2.37786	0.0174132	0.20539	3.41408	0	0	19.3838	9.96358	1.02026	39.1949
TCAF2C	ENSG00000283528		TRPM8 channel associated factor 2C [Source:HGNC Symbol;Acc:HGNC:53641]	protein_coding	6.38517	4.75637	2.00179	0.0131937	0.129951	2.37606	0.0174987	0.20539	0	1.45474	0	1.21149	1.10706	24.4863	16.4366
SCRIB	ENSG00000180900	23513	scribble planar cell polarity protein [Source:HGNC Symbol;Acc:HGNC:30377]	protein_coding	889.006	-0.387471	0.162984	-0.248624	0.17785	-2.37736	0.0174373	0.20539	955.942	1089.6	1031.96	671.166	838.048	881.509	754.817
TRIM56	ENSG00000169871	81844	tripartite motif containing 56 [Source:HGNC Symbol;Acc:HGNC:19028]	protein_coding	299.756	-0.589228	0.247947	-0.284516	0.329897	-2.37642	0.0174814	0.20539	324.338	417.511	368.077	205.953	312.192	235.681	234.537
POLD2	ENSG00000106628	5425	DNA polymerase delta 2, accessory subunit [Source:HGNC Symbol;Acc:HGNC:9176]	protein_coding	2043.92	0.330087	0.139016	0.226604	0.14707	2.37445	0.017575	0.205679	1840.19	1712.23	1802.23	2066.8	1952.86	2633.3	2299.85
AQP1	ENSG00000240583	358	aquaporin 1 (Colton blood group) [Source:HGNC Symbol;Acc:HGNC:633]	protein_coding	6.10251	-4.82635	2.03232	-0.0159136	0.130405	-2.3748	0.0175587	0.205679	34.1408	0	6.73312	1.21149	0	0	0.632175
CCDC9B	ENSG00000188549	388115	coiled-coil domain containing 9B [Source:HGNC Symbol;Acc:HGNC:33488]	protein_coding	44.5659	-1.6679	0.702531	-0.05732	0.146426	-2.37413	0.0175906	0.205679	104.129	37.8233	75.8598	26.6528	5.53532	44.8916	17.0687
INTS3	ENSG00000143624	65123	integrator complex subunit 3 [Source:HGNC Symbol;Acc:HGNC:26153]	protein_coding	1054.31	-0.351267	0.147904	-0.239383	0.157847	-2.37497	0.0175504	0.205679	1061.78	1336.91	1204.78	969.192	965.36	927.42	914.758
NISCH	ENSG00000010322	11188	nischarin [Source:HGNC Symbol;Acc:HGNC:18006]	protein_coding	1139.95	-0.368197	0.155101	-0.241362	0.16695	-2.37392	0.0176005	0.205679	1153.96	1444.56	1320.59	925.579	1167.95	994.758	972.285
H2BC12	ENSG00000197903	85236	H2B clustered histone 12 [Source:HGNC Symbol;Acc:HGNC:13954]	protein_coding	1290.98	0.444113	0.187296	0.261382	0.218516	2.37118	0.0177316	0.206128	1283.69	781.196	1151.81	1755.45	1254.3	1412.05	1398.37
IP6K2	ENSG00000068745	51447	inositol hexakisphosphate kinase 2 [Source:HGNC Symbol;Acc:HGNC:17313]	protein_coding	1163.97	0.365862	0.154232	0.239136	0.167707	2.37215	0.0176848	0.206128	1015.69	938.308	1047.67	1524.05	1167.95	1173.3	1280.79
F8	ENSG00000185010	2157	coagulation factor VIII [Source:HGNC Symbol;Acc:HGNC:3546]	protein_coding	21.079	-2.00988	0.847554	-0.0468464	0.140637	-2.37138	0.0177217	0.206128	34.1408	40.7327	35.4611	19.3838	5.53532	4.08106	8.21828
KDM6B	ENSG00000132510	23135	lysine demethylase 6B [Source:HGNC Symbol;Acc:HGNC:29012]	protein_coding	236.351	-0.714495	0.301326	-0.234674	0.423965	-2.37117	0.0177318	0.206128	252.642	347.683	310.172	133.264	172.702	267.309	170.687
RAPGEF1	ENSG00000107263	2889	Rap guanine nucleotide exchange factor 1 [Source:HGNC Symbol;Acc:HGNC:4568]	protein_coding	616.729	-0.535012	0.225487	-0.279462	0.281729	-2.37269	0.0176589	0.206128	536.011	926.67	780.593	420.387	546.89	630.523	476.028
FNBP1	ENSG00000187239	23048	formin binding protein 1 [Source:HGNC Symbol;Acc:HGNC:17069]	protein_coding	329.689	-0.531974	0.224339	-0.281716	0.278544	-2.3713	0.0177257	0.206128	445.537	362.23	391.867	290.758	239.126	307.1	271.203
TMEM39B	ENSG00000121775	55116	transmembrane protein 39B [Source:HGNC Symbol;Acc:HGNC:25510]	protein_coding	442.604	0.537387	0.226856	0.275713	0.291072	2.36885	0.0178434	0.207245	337.994	362.23	358.651	358.601	531.391	610.118	539.245
FAM241B	ENSG00000171224	219738	family with sequence similarity 241 member B [Source:HGNC Symbol;Acc:HGNC:23519]	protein_coding	237.532	0.627527	0.265241	0.255373	0.377107	2.36588	0.0179874	0.207777	213.38	136.746	195.26	283.489	265.695	288.735	279.421
R3HCC1	ENSG00000104679	203069	R3H domain and coiled-coil containing 1 [Source:HGNC Symbol;Acc:HGNC:27329]	protein_coding	1001.99	0.384361	0.162476	0.248811	0.179598	2.36565	0.0179984	0.207777	875.712	794.288	893.26	1251.47	1175.7	912.116	1111.36
CRISPLD2	ENSG00000103196	83716	cysteine rich secretory protein LCCL domain containing 2 [Source:HGNC Symbol;Acc:HGNC:25248]	protein_coding	9.65394	4.21431	1.78015	0.0157754	0.130343	2.36739	0.0179141	0.207777	1.70704	1.45474	0	31.4988	0	5.10132	27.8157
SYN3	ENSG00000185666	8224	synapsin III [Source:HGNC Symbol;Acc:HGNC:11496]	protein_coding	45.1259	-1.45522	0.615112	-0.0687461	0.154309	-2.36578	0.0179922	0.207777	30.7267	110.56	70.0244	19.3838	36.5331	26.5269	22.1261
SRCIN1	ENSG00000277363	80725	SRC kinase signaling inhibitor 1 [Source:HGNC Symbol;Acc:HGNC:29506]	protein_coding	111.408	-0.932297	0.393976	-0.135865	0.238834	-2.36638	0.017963	0.207777	143.391	164.386	149.924	54.5171	70.8521	123.452	73.3323
SLX4IP	ENSG00000149346	128710	SLX4 interacting protein [Source:HGNC Symbol;Acc:HGNC:16225]	protein_coding	134.616	-0.848868	0.358655	-0.157448	0.278579	-2.36681	0.017942	0.207777	165.583	196.39	178.203	69.055	145.025	93.8643	94.1941
ADAM17	ENSG00000151694	6868	ADAM metallopeptidase domain 17 [Source:HGNC Symbol;Acc:HGNC:195]	protein_coding	507.588	-0.461644	0.195031	-0.268895	0.226026	-2.36703	0.0179314	0.207777	506.991	695.366	599.247	473.693	408.507	448.916	420.397
DPY19L2	ENSG00000177990	283417	dpy-19 like 2 [Source:HGNC Symbol;Acc:HGNC:19414]	protein_coding	17.6055	-3.72894	1.57868	-0.0107175	0.129616	-2.36206	0.0181737	0.209619	1.70704	77.1012	0	1.21149	1.10706	1.02026	41.0914
DNAJC8	ENSG00000126698	22826	DnaJ heat shock protein family (Hsp40) member C8 [Source:HGNC Symbol;Acc:HGNC:15470]	protein_coding	4341.01	0.307046	0.130009	0.214658	0.136008	2.36174	0.0181896	0.209621	4194.2	3168.42	4124.71	5097.95	4940.83	4332.04	4528.9
GLYR1	ENSG00000140632	84656	glyoxylate reductase 1 homolog [Source:HGNC Symbol;Acc:HGNC:24434]	protein_coding	768.17	-0.422387	0.178923	-0.255801	0.200411	-2.36071	0.0182398	0.210017	838.157	942.672	911.215	543.959	707.414	792.746	641.026
GPX4	ENSG00000167468	2879	glutathione peroxidase 4 [Source:HGNC Symbol;Acc:HGNC:4556]	protein_coding	3067.5	0.338447	0.143473	0.228453	0.152515	2.35896	0.0183262	0.210831	2907.09	2455.6	2643.42	2759.78	3170.63	4019.84	3516.16
EIF3H	ENSG00000147677	8667	eukaryotic translation initiation factor 3 subunit H [Source:HGNC Symbol;Acc:HGNC:3273]	protein_coding	2797.62	0.29941	0.126963	0.210746	0.132261	2.35825	0.0183612	0.211051	2464.97	2254.85	2707.16	3403.08	3096.46	2779.2	2877.66
KMT5A	ENSG00000183955	387893	lysine methyltransferase 5A [Source:HGNC Symbol;Acc:HGNC:29489]	protein_coding	939.691	-0.452537	0.191934	-0.266225	0.221457	-2.35777	0.0183851	0.211143	969.599	1214.71	1141.04	636.032	799.301	1061.08	756.082
ARMC10	ENSG00000170632	83787	armadillo repeat containing 10 [Source:HGNC Symbol;Acc:HGNC:21706]	protein_coding	660.508	0.496062	0.210521	0.267654	0.257804	2.35635	0.0184554	0.211442	667.453	395.689	544.934	860.158	761.66	627.463	766.196
BACH2	ENSG00000112182	60468	BTB domain and CNC homolog 2 [Source:HGNC Symbol;Acc:HGNC:14078]	protein_coding	53.5123	1.2041	0.510914	0.0794881	0.163039	2.35675	0.0184355	0.211442	29.0197	27.6401	35.91	62.9975	89.6722	59.1753	70.1714
NCR3	ENSG00000204475	259197	natural cytotoxicity triggering receptor 3 [Source:HGNC Symbol;Acc:HGNC:19077]	protein_coding	9.31936	-4.06814	1.7265	-0.0166557	0.13046	-2.35629	0.0184587	0.211442	30.7267	1.45474	26.9325	0	0	6.12159	0
MSRB1	ENSG00000198736	51734	methionine sulfoxide reductase B1 [Source:HGNC Symbol;Acc:HGNC:14133]	protein_coding	563.583	0.511821	0.217504	0.267494	0.270946	2.35316	0.0186148	0.213005	553.081	344.773	465.034	714.779	698.558	510.132	658.727
NAV1	ENSG00000134369	89796	neuron navigator 1 [Source:HGNC Symbol;Acc:HGNC:15989]	protein_coding	202.727	-0.762268	0.324047	-0.191528	0.348402	-2.35234	0.0186556	0.213005	175.825	347.683	267.978	157.494	204.807	122.432	142.872
SAFB	ENSG00000160633	6294	scaffold attachment factor B [Source:HGNC Symbol;Acc:HGNC:10520]	protein_coding	1399.24	-0.364031	0.154757	-0.236861	0.166031	-2.35227	0.0186592	0.213005	1427.09	1742.78	1634.8	1055.21	1451.36	1293.7	1189.75
ZNF215	ENSG00000149054	7762	zinc finger protein 215 [Source:HGNC Symbol;Acc:HGNC:13007]	protein_coding	204.936	-0.665435	0.282825	-0.251415	0.399204	-2.35281	0.0186321	0.213005	216.794	304.041	256.756	193.838	169.381	135.695	158.044
GRID2	ENSG00000152208	2895	glutamate ionotropic receptor delta type subunit 2 [Source:HGNC Symbol;Acc:HGNC:4576]	protein_coding	9.85794	3.81631	1.62283	0.0167837	0.130559	2.35164	0.0186906	0.213182	1.70704	0	0	30.2873	16.606	20.4053	0
C2CD4A	ENSG00000198535	145741	C2 calcium dependent domain containing 4A [Source:HGNC Symbol;Acc:HGNC:33627]	protein_coding	9.11612	4.19378	1.78466	0.0157659	0.130342	2.34991	0.0187781	0.213865	1.70704	1.45474	0	35.1332	1.10706	1.02026	23.3905
CELSR1	ENSG00000075275	9620	cadherin EGF LAG seven-pass G-type receptor 1 [Source:HGNC Symbol;Acc:HGNC:1850]	protein_coding	458.911	-0.544464	0.231705	-0.269528	0.291242	-2.34982	0.0187826	0.213865	503.577	603.717	566.929	272.585	486.001	422.39	357.179
FAM53A	ENSG00000174137	152877	family with sequence similarity 53 member A [Source:HGNC Symbol;Acc:HGNC:31860]	protein_coding	24.7146	1.95854	0.833793	0.0424032	0.13849	2.34895	0.0188265	0.214049	11.9493	5.81896	10.773	42.4022	47.6038	10.2026	44.2523
PTPN23	ENSG00000076201	25930	protein tyrosine phosphatase non-receptor type 23 [Source:HGNC Symbol;Acc:HGNC:14406]	protein_coding	293.401	-0.587029	0.24992	-0.273212	0.330995	-2.34886	0.0188309	0.214049	303.853	418.965	363.139	193.838	274.552	269.35	230.112
GMFB	ENSG00000197045	2764	glia maturation factor beta [Source:HGNC Symbol;Acc:HGNC:4373]	protein_coding	1553.23	0.413059	0.175963	0.251407	0.19863	2.34742	0.0189041	0.214103	1375.87	1229.26	1316.55	2283.66	1520	1370.22	1777.04
BSG	ENSG00000172270	682	basigin (Ok blood group) [Source:HGNC Symbol;Acc:HGNC:1116]	protein_coding	8053.66	0.362086	0.154298	0.235829	0.166671	2.34667	0.0189423	0.214103	7009.11	7122.41	6662.64	6612.31	8048.36	11374.9	9545.85
PYCR1	ENSG00000183010	5831	pyrroline-5-carboxylate reductase 1 [Source:HGNC Symbol;Acc:HGNC:9721]	protein_coding	3401.2	0.278036	0.11841	0.202185	0.121644	2.34807	0.0188708	0.214103	3216.06	2649.08	3247.16	3575.11	3833.76	3733.15	3554.09
ITIH5	ENSG00000123243	80760	inter-alpha-trypsin inhibitor heavy chain 5 [Source:HGNC Symbol;Acc:HGNC:21449]	protein_coding	6.73508	4.8227	2.05425	0.012194	0.129814	2.34767	0.0188914	0.214103	0	1.45474	0	3.63447	24.3554	0	17.7009
DNAH1	ENSG00000114841	25981	dynein axonemal heavy chain 1 [Source:HGNC Symbol;Acc:HGNC:2940]	protein_coding	88.062	-0.953497	0.406319	-0.122774	0.214861	-2.34667	0.0189419	0.214103	145.098	103.287	116.259	81.1699	58.6744	49.993	61.9532
FREM2	ENSG00000150893	341640	FRAS1 related extracellular matrix 2 [Source:HGNC Symbol;Acc:HGNC:25396]	protein_coding	242.143	-0.749296	0.319318	-0.193668	0.349105	-2.34655	0.0189481	0.214103	221.915	395.689	324.087	132.052	274.552	178.546	168.159
DDX52	ENSG00000278053	11056	DExD-box helicase 52 [Source:HGNC Symbol;Acc:HGNC:20038]	protein_coding	934.276	-0.348815	0.148553	-0.226054	0.15685	-2.34808	0.0188705	0.214103	1072.02	1057.6	1062.93	775.354	927.72	824.374	819.931
FEZ1	ENSG00000149557	9638	fasciculation and elongation protein zeta 1 [Source:HGNC Symbol;Acc:HGNC:3659]	protein_coding	456.677	0.564526	0.240683	0.265716	0.318489	2.34552	0.0190006	0.214474	290.197	429.148	359.1	362.236	581.209	603.997	570.854
ALKBH2	ENSG00000189046	121642	alkB homolog 2, alpha-ketoglutarate dependent dioxygenase [Source:HGNC Symbol;Acc:HGNC:32487]	protein_coding	669.684	0.496879	0.211924	0.264903	0.259462	2.34461	0.0190471	0.214474	689.644	392.78	548.974	661.474	870.153	729.489	795.276
PNPLA4	ENSG00000006757	8228	patatin like phospholipase domain containing 4 [Source:HGNC Symbol;Acc:HGNC:24887]	protein_coding	126.449	1.04679	0.446347	0.0960578	0.179811	2.34525	0.0190144	0.214474	81.9379	80.0107	74.962	82.3813	101.85	277.512	186.492
ZNF775	ENSG00000196456	285971	zinc finger protein 775 [Source:HGNC Symbol;Acc:HGNC:28501]	protein_coding	101.576	1.42368	0.607286	0.0615778	0.149183	2.34433	0.0190615	0.214474	102.422	11.6379	42.1942	44.8251	177.13	152.019	180.802
INCA1	ENSG00000196388	388324	inhibitor of CDK, cyclin A1 interacting protein 1 [Source:HGNC Symbol;Acc:HGNC:32224]	protein_coding	12.7691	4.48736	1.91376	0.00519834	0.129144	2.34478	0.0190383	0.214474	0	0	21.0971	27.8643	0	39.7903	0.632175
IGF2BP1	ENSG00000159217	10642	insulin like growth factor 2 mRNA binding protein 1 [Source:HGNC Symbol;Acc:HGNC:28866]	protein_coding	2416.58	-0.300322	0.128189	-0.210823	0.13199	-2.3428	0.0191397	0.215172	2524.71	2839.65	2749.36	1932.33	2341.44	2413.95	2114.63
H3-3B	ENSG00000132475	3021	H3.3 histone B [Source:HGNC Symbol;Acc:HGNC:4765]	protein_coding	8887.59	0.280043	0.119554	0.201568	0.122806	2.34241	0.0191598	0.215216	8615.43	6774.73	8397.99	10673.2	9578.32	8832.43	9341.02
G0S2	ENSG00000123689	50486	G0/G1 switch 2 [Source:HGNC Symbol;Acc:HGNC:30229]	protein_coding	116.997	1.02847	0.439214	0.0978354	0.181681	2.34162	0.0192005	0.21531	116.079	30.5496	75.4109	119.938	171.595	139.776	165.63
ADRA1B	ENSG00000170214	147	adrenoceptor alpha 1B [Source:HGNC Symbol;Acc:HGNC:278]	protein_coding	6.52483	4.73739	2.02307	0.0124715	0.129841	2.34169	0.0191967	0.21531	1.70704	0	0	7.26894	0	18.3648	18.3331
CRACR2A	ENSG00000130038	84766	calcium release activated channel regulator 2A [Source:HGNC Symbol;Acc:HGNC:28657]	protein_coding	192.171	-0.677252	0.289325	-0.237726	0.395944	-2.3408	0.0192425	0.2156	225.329	264.763	242.392	125.995	195.95	142.837	147.929
RPP25L	ENSG00000164967	138716	ribonuclease P/MRP subunit p25 like [Source:HGNC Symbol;Acc:HGNC:19909]	protein_coding	678.045	0.478643	0.204523	0.26455	0.246301	2.34028	0.0192691	0.215717	703.301	397.144	563.786	811.699	746.161	739.692	784.529
PLEKHH1	ENSG00000054690	57475	pleckstrin homology, MyTH4 and FERM domain containing H1 [Source:HGNC Symbol;Acc:HGNC:17733]	protein_coding	406.967	-0.537563	0.229731	-0.270257	0.286849	-2.33996	0.0192857	0.215721	561.616	427.694	493.313	284.7	440.612	315.262	325.57
SUPT16H	ENSG00000092201	11198	SPT16 homolog, facilitates chromatin remodeling subunit [Source:HGNC Symbol;Acc:HGNC:11465]	protein_coding	4054.77	-0.273877	0.117093	-0.19875	0.118808	-2.33897	0.0193369	0.216113	3982.52	4944.66	4557.87	3705.95	4005.36	3589.29	3597.71
JAKMIP3	ENSG00000188385	282973	Janus kinase and microtubule interacting protein 3 [Source:HGNC Symbol;Acc:HGNC:23523]	protein_coding	11.1883	-4.36	1.86444	-0.00843441	0.129392	-2.3385	0.0193612	0.216203	5.12112	43.6422	0	0	1.10706	0	28.4479
FGD1	ENSG00000102302	2245	FYVE, RhoGEF and PH domain containing 1 [Source:HGNC Symbol;Acc:HGNC:3663]	protein_coding	320.934	-0.528602	0.226182	-0.269773	0.279529	-2.33706	0.019436	0.216856	384.084	398.599	383.339	265.316	232.484	320.363	262.353
VDAC1	ENSG00000213585	7416	voltage dependent anion channel 1 [Source:HGNC Symbol;Acc:HGNC:12669]	protein_coding	3524.38	0.285321	0.122141	0.203689	0.125373	2.336	0.019491	0.217288	3140.95	3102.96	3166.81	3596.92	3379.87	4376.93	3906.21
R3HDM2	ENSG00000179912	22864	R3H domain containing 2 [Source:HGNC Symbol;Acc:HGNC:29167]	protein_coding	431.56	-0.520093	0.222685	-0.267916	0.272916	-2.33556	0.0195144	0.217367	495.042	544.073	523.388	356.178	286.73	470.342	345.168
RAB1B	ENSG00000174903	81876	RAB1B, member RAS oncogene family [Source:HGNC Symbol;Acc:HGNC:18370]	protein_coding	2546.24	0.40021	0.17148	0.247263	0.191322	2.33386	0.0196028	0.217987	2627.13	1728.23	2113.3	2690.72	2231.84	3432.17	3000.3
FRRS1L	ENSG00000260230	23732	ferric chelate reductase 1 like [Source:HGNC Symbol;Acc:HGNC:1362]	protein_coding	135.754	-0.828255	0.354851	-0.15391	0.267908	-2.33409	0.0195908	0.217987	143.391	218.211	179.55	116.303	70.8521	126.513	95.4585
STRBP	ENSG00000165209	55342	spermatid perinuclear RNA binding protein [Source:HGNC Symbol;Acc:HGNC:16462]	protein_coding	719.354	0.412334	0.176732	0.247303	0.199325	2.3331	0.0196428	0.218068	677.695	506.25	634.709	803.218	883.437	725.408	804.759
RBM33	ENSG00000184863	155435	RNA binding motif protein 33 [Source:HGNC Symbol;Acc:HGNC:27223]	protein_coding	787.614	-0.35718	0.153082	-0.232842	0.163222	-2.33327	0.0196341	0.218068	870.59	931.034	897.3	665.108	726.234	734.59	688.439
KIAA1958	ENSG00000165185	158405	KIAA1958 [Source:HGNC Symbol;Acc:HGNC:23427]	protein_coding	359.742	-0.568297	0.243638	-0.266696	0.313992	-2.33255	0.0196718	0.218208	558.202	328.771	437.204	341.64	301.122	264.249	287.008
KLC3	ENSG00000104892	147700	kinesin light chain 3 [Source:HGNC Symbol;Acc:HGNC:20717]	protein_coding	324.752	-0.646359	0.277341	-0.242894	0.374837	-2.33056	0.0197766	0.219188	474.557	334.59	415.658	212.011	384.151	210.174	242.123
MRPL13	ENSG00000172172	28998	mitochondrial ribosomal protein L13 [Source:HGNC Symbol;Acc:HGNC:14278]	protein_coding	703.087	0.58278	0.250159	0.253905	0.335374	2.32964	0.0198254	0.219364	573.565	536.799	534.161	1216.34	671.988	513.193	875.563
RPS15A	ENSG00000134419	6210	ribosomal protein S15a [Source:HGNC Symbol;Acc:HGNC:10389]	protein_coding	9433.81	0.34506	0.148106	0.227397	0.158052	2.32981	0.019816	0.219364	7866.04	8593.15	8074.8	11859.3	11535.6	7355.09	10752.7
NEK9	ENSG00000119638	91754	NIMA related kinase 9 [Source:HGNC Symbol;Acc:HGNC:18591]	protein_coding	1610.3	-0.326221	0.140086	-0.2205	0.14641	-2.32873	0.0198736	0.219714	1647.29	1965.35	1843.08	1341.12	1666.13	1412.05	1397.11
TMEM50A	ENSG00000183726	23585	transmembrane protein 50A [Source:HGNC Symbol;Acc:HGNC:30590]	protein_coding	1780.05	0.351808	0.15111	0.227819	0.162098	2.32816	0.0199038	0.219865	1742.89	1293.26	1582.28	2264.28	1865.4	1743.63	1968.59
C7orf50	ENSG00000146540	84310	chromosome 7 open reading frame 50 [Source:HGNC Symbol;Acc:HGNC:22421]	protein_coding	996.904	0.445217	0.191355	0.253821	0.222153	2.32666	0.0199834	0.220562	1041.29	610.991	830.867	1242.99	962.039	1134.53	1155.62
THOC3	ENSG00000051596	84321	THO complex 3 [Source:HGNC Symbol;Acc:HGNC:19072]	protein_coding	3283.02	0.278133	0.119617	0.199717	0.122449	2.3252	0.0200611	0.221054	3139.25	2611.26	3042.92	3370.37	3871.4	3420.95	3525.01
STX1A	ENSG00000106089	6804	syntaxin 1A [Source:HGNC Symbol;Acc:HGNC:11433]	protein_coding	99.1143	-1.04647	0.45001	-0.101711	0.185814	-2.32544	0.0200487	0.221054	122.907	152.748	144.538	53.3056	39.8543	120.391	60.0566
CCDC78	ENSG00000162004	124093	coiled-coil domain containing 78 [Source:HGNC Symbol;Acc:HGNC:14153]	protein_coding	26.2871	-3.05121	1.31269	-0.020475	0.131051	-2.32439	0.0201044	0.221244	1.70704	64.0086	88.4283	1.21149	1.10706	27.5471	0
DHX16	ENSG00000204560	8449	DEAH-box helicase 16 [Source:HGNC Symbol;Acc:HGNC:2739]	protein_coding	623.896	-0.391552	0.16847	-0.242952	0.184063	-2.32416	0.0201169	0.221244	660.625	784.105	718.648	556.074	566.817	541.76	539.245
UBR3	ENSG00000144357	130507	ubiquitin protein ligase E3 component n-recognin 3 [Source:HGNC Symbol;Acc:HGNC:30467]	protein_coding	334.464	-0.576157	0.247922	-0.260966	0.321039	-2.32395	0.0201282	0.221244	322.631	493.157	417.453	281.066	229.162	336.687	261.088
ZNF221	ENSG00000159905	7638	zinc finger protein 221 [Source:HGNC Symbol;Acc:HGNC:13014]	protein_coding	38.6354	-1.5278	0.657627	-0.0620332	0.149371	-2.32321	0.020168	0.221499	29.0197	93.1034	61.9447	14.5379	18.8201	34.689	18.3331
MIPOL1	ENSG00000151338	145282	mirror-image polydactyly 1 [Source:HGNC Symbol;Acc:HGNC:21460]	protein_coding	243.853	-0.703032	0.302737	-0.20822	0.362436	-2.32225	0.0202194	0.22188	349.943	269.127	317.354	208.376	120.67	263.228	178.273
LRP1	ENSG00000123384	4035	LDL receptor related protein 1 [Source:HGNC Symbol;Acc:HGNC:6692]	protein_coding	425.599	-0.58223	0.250852	-0.256443	0.325505	-2.32101	0.0202863	0.222431	433.588	599.353	538.649	283.489	501.5	298.938	323.674
PHTF2	ENSG00000006576	57157	putative homeodomain transcription factor 2 [Source:HGNC Symbol;Acc:HGNC:13411]	protein_coding	426.387	0.468173	0.201775	0.254146	0.239529	2.32028	0.0203258	0.222681	355.064	321.498	374.81	480.962	544.676	428.511	479.189
RPA3	ENSG00000106399	6119	replication protein A3 [Source:HGNC Symbol;Acc:HGNC:10291]	protein_coding	1353.16	0.435498	0.187745	0.248342	0.215541	2.31963	0.020361	0.222883	1314.42	941.217	1127.12	1920.21	1476.82	1131.47	1560.84
CHMP5	ENSG00000086065	51510	charged multivesicular body protein 5 [Source:HGNC Symbol;Acc:HGNC:26942]	protein_coding	1134.32	0.499747	0.215489	0.258093	0.26415	2.31913	0.020388	0.222963	1073.73	781.196	900.442	1742.12	1235.48	846.82	1360.44
RPH3AL	ENSG00000181031	9501	rabphilin 3A like (without C2 domains) [Source:HGNC Symbol;Acc:HGNC:10296]	protein_coding	45.5561	-1.37351	0.592396	-0.0708593	0.155741	-2.31857	0.0204184	0.222963	87.059	59.6444	62.3936	41.1907	12.1777	33.6687	22.7583
TBC1D2B	ENSG00000167202	23102	TBC1 domain family member 2B [Source:HGNC Symbol;Acc:HGNC:29183]	protein_coding	555.035	-0.484499	0.208959	-0.264345	0.2482	-2.31863	0.020415	0.222963	677.695	634.267	675.107	356.178	497.072	594.814	450.109
TSPAN11	ENSG00000110900	441631	tetraspanin 11 [Source:HGNC Symbol;Acc:HGNC:30795]	protein_coding	16.8126	3.38825	1.46159	0.0180061	0.130705	2.3182	0.0204382	0.222996	1.70704	7.2737	0	1.21149	58.6744	2.04053	46.781
ZNF664	ENSG00000179195	144348	zinc finger protein 664 [Source:HGNC Symbol;Acc:HGNC:25406]	protein_coding	2538.38	-0.255021	0.110044	-0.188607	0.110467	-2.31745	0.0204794	0.223263	2693.71	2883.3	2809.51	2364.83	2404.54	2312.94	2299.85
ACTR6	ENSG00000075089	64431	actin related protein 6 [Source:HGNC Symbol;Acc:HGNC:24025]	protein_coding	697.812	0.453073	0.195534	0.250731	0.228972	2.31711	0.0204979	0.223282	605.999	510.614	614.509	965.558	804.836	613.179	769.989
NDUFAF4	ENSG00000123545	29078	NADH:ubiquinone oxidoreductase complex assembly factor 4 [Source:HGNC Symbol;Acc:HGNC:21034]	protein_coding	454.929	0.702213	0.303633	0.185191	0.32099	2.31271	0.0207389	0.225721	353.357	334.59	318.252	828.659	491.537	263.228	594.877
CD9	ENSG00000010278	928	CD9 molecule [Source:HGNC Symbol;Acc:HGNC:1709]	protein_coding	826.106	0.354916	0.153583	0.227561	0.165305	2.31091	0.0208378	0.226613	667.453	712.823	759.945	858.947	938.791	950.887	893.896
PFKM	ENSG00000152556	5213	phosphofructokinase, muscle [Source:HGNC Symbol;Acc:HGNC:8877]	protein_coding	1028.97	-0.345537	0.149611	-0.225182	0.158023	-2.30956	0.0209123	0.227238	1060.07	1277.26	1172.46	976.461	970.896	849.88	895.792
NOL6	ENSG00000165271	65083	nucleolar protein 6 [Source:HGNC Symbol;Acc:HGNC:19910]	protein_coding	404.968	-0.514712	0.222917	-0.259368	0.270562	-2.30899	0.0209443	0.2274	576.98	401.508	486.58	290.758	396.329	351.991	330.628
TRMT112	ENSG00000173113	51504	tRNA methyltransferase subunit 11-2 [Source:HGNC Symbol;Acc:HGNC:26940]	protein_coding	2686.14	0.343012	0.148645	0.221495	0.15923	2.30759	0.021022	0.228057	2599.82	1814.06	2586.86	3304.95	2817.48	2929.18	2750.59
DNALI1	ENSG00000163879	7802	dynein axonemal light intermediate chain 1 [Source:HGNC Symbol;Acc:HGNC:14353]	protein_coding	5.94544	4.11816	1.78578	0.0159197	0.130359	2.30608	0.0211059	0.228636	0	0	1.7955	8.48043	5.53532	16.3242	9.48263
TGFB3	ENSG00000119699	7043	transforming growth factor beta 3 [Source:HGNC Symbol;Acc:HGNC:11769]	protein_coding	57.1789	-1.30152	0.564399	-0.0742122	0.158295	-2.30602	0.0211096	0.228636	78.5238	93.1034	87.0817	21.8068	21.0342	68.3577	30.3444
SEPTIN6	ENSG00000125354	23157	septin 6 [Source:HGNC Symbol;Acc:HGNC:15848]	protein_coding	1124.99	0.36572	0.158623	0.231517	0.171723	2.30559	0.0211337	0.228711	926.923	1000.86	974.507	1047.94	1173.49	1464.08	1287.11
TUG1	ENSG00000253352		taurine up-regulated 1 [Source:HGNC Symbol;Acc:HGNC:26066]	protein_coding	3026.81	-0.316823	0.137435	-0.217961	0.143066	-2.30525	0.0211526	0.22873	3705.98	3091.32	3425.81	3295.25	2604.92	2409.86	2654.5
SPTBN2	ENSG00000173898	6712	spectrin beta, non-erythrocytic 2 [Source:HGNC Symbol;Acc:HGNC:11276]	protein_coding	740.996	-0.445832	0.193488	-0.250506	0.220662	-2.30419	0.021212	0.229186	682.816	1040.14	892.811	571.823	753.911	641.746	603.727
GSKIP	ENSG00000100744	51527	GSK3B interacting protein [Source:HGNC Symbol;Acc:HGNC:20343]	protein_coding	459.269	0.511945	0.222223	0.251696	0.274758	2.30374	0.0212372	0.229272	358.478	368.049	382.89	671.166	503.714	398.923	531.659
MMP16	ENSG00000156103	4325	matrix metallopeptidase 16 [Source:HGNC Symbol;Acc:HGNC:7162]	protein_coding	61.0963	-1.22364	0.5313	-0.0805222	0.163691	-2.30311	0.0212728	0.229471	73.4027	109.106	88.4283	59.363	17.713	44.8916	34.7696
FBN1	ENSG00000166147	2200	fibrillin 1 [Source:HGNC Symbol;Acc:HGNC:3603]	protein_coding	265.308	-0.576928	0.250558	-0.251802	0.32064	-2.30258	0.0213025	0.229606	264.591	389.87	324.087	236.241	203.7	227.519	211.147
PCDH7	ENSG00000169851	5099	protocadherin 7 [Source:HGNC Symbol;Acc:HGNC:8659]	protein_coding	284.333	0.609492	0.264843	0.227003	0.341396	2.30133	0.0213728	0.22999	247.521	183.297	227.131	288.335	430.648	271.39	342.007
H2BC5	ENSG00000158373	3017	H2B clustered histone 5 [Source:HGNC Symbol;Acc:HGNC:4747]	protein_coding	194.263	0.678368	0.294762	0.190262	0.321971	2.3014	0.0213688	0.22999	145.098	133.836	156.208	298.027	184.88	209.154	232.64
TRIR	ENSG00000123144	79002	telomerase RNA component interacting RNase [Source:HGNC Symbol;Acc:HGNC:28424]	protein_coding	1993.71	0.356941	0.15517	0.228163	0.167087	2.30032	0.0214304	0.229999	2053.57	1358.73	1749.71	2439.94	2104.53	2016.04	2233.48
CCNB1	ENSG00000134057	891	cyclin B1 [Source:HGNC Symbol;Acc:HGNC:1579]	protein_coding	2222.84	0.281743	0.12253	0.199021	0.12573	2.29938	0.0214833	0.229999	2048.45	1777.69	2119.14	2352.71	2541.82	2390.48	2329.57
DLL3	ENSG00000090932	10683	delta like canonical Notch ligand 3 [Source:HGNC Symbol;Acc:HGNC:2909]	protein_coding	206.814	0.681275	0.29619	0.188093	0.318589	2.30013	0.0214408	0.229999	186.067	114.924	161.595	251.99	290.051	195.891	247.181
RET	ENSG00000165731	5979	ret proto-oncogene [Source:HGNC Symbol;Acc:HGNC:9967]	protein_coding	39.4549	1.48903	0.647803	0.0567958	0.145951	2.29858	0.0215289	0.229999	27.3126	10.1832	21.546	27.8643	68.638	61.2159	59.4245
ADAMTS8	ENSG00000134917	11095	ADAM metallopeptidase with thrombospondin type 1 motif 8 [Source:HGNC Symbol;Acc:HGNC:224]	protein_coding	6.25309	4.68578	2.03664	0.0122251	0.129805	2.30075	0.021406	0.229999	1.70704	0	0	9.69192	0	15.304	17.0687
BMS1	ENSG00000165733	9790	BMS1 ribosome biogenesis factor [Source:HGNC Symbol;Acc:HGNC:23505]	protein_coding	1200.48	-0.316166	0.137539	-0.215361	0.142763	-2.29874	0.0215195	0.229999	1276.87	1424.19	1352.46	1097.61	1166.85	1023.33	1062.05
CHD1	ENSG00000153922	1105	chromodomain helicase DNA binding protein 1 [Source:HGNC Symbol;Acc:HGNC:1915]	protein_coding	1257.46	-0.401173	0.174515	-0.241521	0.192099	-2.29878	0.0215172	0.229999	1227.36	1661.31	1482.18	1402.91	985.287	998.839	1044.35
LRIG2	ENSG00000198799	9860	leucine rich repeats and immunoglobulin like domains 2 [Source:HGNC Symbol;Acc:HGNC:20889]	protein_coding	574.755	-0.409435	0.178068	-0.243454	0.196888	-2.29932	0.0214868	0.229999	740.855	606.627	658.499	511.249	541.355	470.342	494.361
SSBP3	ENSG00000157216	23648	single stranded DNA binding protein 3 [Source:HGNC Symbol;Acc:HGNC:15674]	protein_coding	526.974	-0.469551	0.204233	-0.253203	0.237482	-2.29909	0.0214996	0.229999	640.14	606.627	630.22	448.251	362.01	567.267	434.304
DGLUCY	ENSG00000133943	80017	D-glutamate cyclase [Source:HGNC Symbol;Acc:HGNC:20498]	protein_coding	185.806	-0.715149	0.31119	-0.188854	0.324939	-2.29811	0.0215555	0.230098	199.724	279.31	236.557	106.611	191.522	150.999	135.918
NACA	ENSG00000196531	4666	nascent polypeptide associated complex subunit alpha [Source:HGNC Symbol;Acc:HGNC:7629]	protein_coding	13385.1	0.309239	0.134667	0.210395	0.140267	2.29632	0.0216573	0.231	13087.9	10421.8	11852.5	17666	12198.7	13587.9	14880.8
TTI2	ENSG00000129696	80185	TELO2 interacting protein 2 [Source:HGNC Symbol;Acc:HGNC:26262]	protein_coding	263.795	-0.555143	0.241849	-0.253172	0.30341	-2.29541	0.0217094	0.23137	293.611	354.957	318.252	231.395	192.629	240.782	214.94
OAS3	ENSG00000111331	4940	2'-5'-oligoadenylate synthetase 3 [Source:HGNC Symbol;Acc:HGNC:8088]	protein_coding	187.787	-0.822287	0.358317	-0.132888	0.224466	-2.29486	0.0217411	0.231523	232.157	256.034	258.552	75.1124	223.627	143.857	125.171
SPC24	ENSG00000161888	147841	SPC24 component of NDC80 kinetochore complex [Source:HGNC Symbol;Acc:HGNC:26913]	protein_coding	833.896	0.382133	0.166692	0.234233	0.18297	2.29245	0.0218794	0.23281	792.067	605.172	739.745	883.177	863.51	1019.24	934.355
MFSD3	ENSG00000167700	113655	major facilitator superfamily domain containing 3 [Source:HGNC Symbol;Acc:HGNC:25157]	protein_coding	449.232	0.46767	0.204231	0.247392	0.241403	2.28991	0.0220267	0.233317	413.104	308.405	386.93	482.173	474.931	568.287	510.798
NME3	ENSG00000103024	4832	NME/NM23 nucleoside diphosphate kinase 3 [Source:HGNC Symbol;Acc:HGNC:7851]	protein_coding	685.969	0.4221	0.184243	0.244119	0.209446	2.291	0.0219635	0.233317	677.695	453.879	595.208	766.873	735.091	799.887	773.15
DNAL4	ENSG00000100246	10126	dynein axonemal light chain 4 [Source:HGNC Symbol;Acc:HGNC:2955]	protein_coding	303.713	0.576014	0.251576	0.237642	0.324547	2.28962	0.0220431	0.233317	264.591	203.664	245.983	265.316	363.117	417.288	366.029
FBXO38	ENSG00000145868	81545	F-box protein 38 [Source:HGNC Symbol;Acc:HGNC:28844]	protein_coding	286.863	-0.610137	0.266379	-0.236392	0.34063	-2.29049	0.0219932	0.233317	433.588	282.22	354.162	267.739	269.017	177.526	223.79
GOLGA6L4	ENSG00000184206	643707	golgin A6 family like 4 [Source:HGNC Symbol;Acc:HGNC:27256]	protein_coding	272.79	-0.585271	0.255597	-0.2441	0.325315	-2.28982	0.0220319	0.233317	401.154	277.855	330.821	232.606	261.267	187.729	218.1
PHF20L1	ENSG00000129292	51105	PHD finger protein 20 like 1 [Source:HGNC Symbol;Acc:HGNC:24280]	protein_coding	709.293	-0.460844	0.20126	-0.249665	0.232016	-2.28979	0.0220332	0.233317	792.067	874.299	850.617	795.949	609.993	461.16	580.969
ATRN	ENSG00000088812	8455	attractin [Source:HGNC Symbol;Acc:HGNC:885]	protein_coding	591.495	-0.463514	0.202451	-0.249684	0.233948	-2.28951	0.0220497	0.233317	544.546	840.84	715.506	478.539	588.958	489.727	482.35
CLBA1	ENSG00000140104	122616	clathrin binding box of aftiphilin containing 1 [Source:HGNC Symbol;Acc:HGNC:20126]	protein_coding	113.901	-0.855382	0.373699	-0.133323	0.228693	-2.28896	0.0220818	0.233424	121.2	186.207	150.373	65.4205	111.814	82.6414	79.6541
GOLGA8B	ENSG00000215252	440270	golgin A8 family member B [Source:HGNC Symbol;Acc:HGNC:31973]	protein_coding	1220.33	-0.361247	0.157837	-0.22758	0.16837	-2.28873	0.0220949	0.233424	1145.42	1619.13	1420.69	1112.15	1175.7	1027.41	1041.82
PSMB6	ENSG00000142507	5694	proteasome 20S subunit beta 6 [Source:HGNC Symbol;Acc:HGNC:9543]	protein_coding	2063.93	0.295829	0.129292	0.20508	0.134181	2.28807	0.0221333	0.233632	1891.4	1600.21	1996.15	2284.87	2182.02	2364.97	2127.9
DHRS7	ENSG00000100612	51635	dehydrogenase/reductase 7 [Source:HGNC Symbol;Acc:HGNC:21524]	protein_coding	2191.48	0.306323	0.133907	0.199477	0.138348	2.28758	0.0221618	0.233632	2091.12	1627.85	2081.43	2563.51	2366.9	2316	2293.53
FMC1	ENSG00000164898	154791	formation of mitochondrial complex V assembly factor 1 homolog [Source:HGNC Symbol;Acc:HGNC:26946]	protein_coding	120.331	0.804311	0.351659	0.133004	0.226934	2.28719	0.0221847	0.233632	80.2309	80.0107	93.3659	184.147	138.383	121.411	144.768
RANBP2	ENSG00000153201	5903	RAN binding protein 2 [Source:HGNC Symbol;Acc:HGNC:9848]	protein_coding	1699.22	-0.377108	0.164874	-0.232661	0.178075	-2.28724	0.0221817	0.233632	1640.47	2215.57	2002.88	1524.05	1843.26	1247.78	1420.5
HSPB1	ENSG00000106211	3315	heat shock protein family B (small) member 1 [Source:HGNC Symbol;Acc:HGNC:5246]	protein_coding	1370.56	0.333585	0.145965	0.218598	0.154264	2.28538	0.0222908	0.234379	1275.16	1096.87	1213.31	1341.12	1419.26	1717.11	1531.13
CABIN1	ENSG00000099991	23523	calcineurin binding protein 1 [Source:HGNC Symbol;Acc:HGNC:24187]	protein_coding	988.599	-0.453623	0.198489	-0.246201	0.227334	-2.28538	0.0222908	0.234379	1097.63	1189.98	1212.86	586.361	1027.36	1015.16	790.851
THOP1	ENSG00000172009	7064	thimet oligopeptidase 1 [Source:HGNC Symbol;Acc:HGNC:11793]	protein_coding	1261.85	0.342447	0.149925	0.220613	0.160599	2.28411	0.0223648	0.234972	1126.65	935.398	1226.77	1350.81	1504.5	1399.8	1289.01
SLX4	ENSG00000188827	84464	SLX4 structure-specific endonuclease subunit [Source:HGNC Symbol;Acc:HGNC:23845]	protein_coding	270.951	-0.646824	0.283382	-0.214461	0.341643	-2.28252	0.0224587	0.235772	257.763	416.056	347.429	239.875	273.445	159.161	202.928
LMAN2	ENSG00000169223	10960	lectin, mannose binding 2 [Source:HGNC Symbol;Acc:HGNC:16986]	protein_coding	2141.64	0.3546	0.155382	0.225219	0.166501	2.28211	0.0224826	0.235837	1937.49	1792.24	1821.53	1822.08	2269.48	2859.8	2488.87
GINS2	ENSG00000131153	51659	GINS complex subunit 2 [Source:HGNC Symbol;Acc:HGNC:24575]	protein_coding	1473.81	0.397702	0.174384	0.234106	0.193222	2.28061	0.0225714	0.236208	1510.73	977.586	1259.54	1948.08	1515.57	1427.35	1677.79
METTL17	ENSG00000165792	64745	methyltransferase like 17 [Source:HGNC Symbol;Acc:HGNC:19280]	protein_coding	980.282	0.374661	0.164314	0.230794	0.179605	2.28015	0.0225991	0.236208	891.075	730.28	896.851	1228.45	1124.78	933.542	1057
PGAM1	ENSG00000171314	5223	phosphoglycerate mutase 1 [Source:HGNC Symbol;Acc:HGNC:8888]	protein_coding	7862.97	0.256408	0.112401	0.185599	0.113613	2.28118	0.0225376	0.236208	7553.65	6104.09	7604.83	8287.81	8465.72	8912.01	8112.7
TOMM5	ENSG00000175768	401505	translocase of outer mitochondrial membrane 5 [Source:HGNC Symbol;Acc:HGNC:31369]	protein_coding	303.847	0.673635	0.29548	0.183519	0.307132	2.2798	0.0226198	0.236208	303.853	152.748	225.335	401.003	424.006	243.843	376.144
H2AC18	ENSG00000203812	8337	H2A clustered histone 18 [Source:HGNC Symbol;Acc:HGNC:4736]	protein_coding	382.126	0.704473	0.309017	0.168074	0.28381	2.27972	0.0226243	0.236208	423.346	149.838	272.916	467.635	530.284	329.545	501.315
PLAU	ENSG00000122861	5328	plasminogen activator, urokinase [Source:HGNC Symbol;Acc:HGNC:9052]	protein_coding	21.1657	-3.46398	1.51882	-0.0110237	0.129639	-2.2807	0.0225661	0.236208	1.70704	84.3749	0	2.42298	1.10706	1.02026	57.5279
WASF3	ENSG00000132970	10810	WASP family member 3 [Source:HGNC Symbol;Acc:HGNC:12734]	protein_coding	328.704	-0.492961	0.216284	-0.250203	0.255749	-2.27923	0.0226535	0.236327	358.478	432.058	389.623	265.316	293.372	287.715	274.364
BMPR2	ENSG00000204217	659	bone morphogenetic protein receptor type 2 [Source:HGNC Symbol;Acc:HGNC:1078]	protein_coding	658.687	-0.374093	0.164166	-0.230682	0.176428	-2.27875	0.0226821	0.236441	705.008	814.655	750.518	600.899	597.815	567.267	574.647
RRM2B	ENSG00000048392	50484	ribonucleotide reductase regulatory TP53 inducible subunit M2B [Source:HGNC Symbol;Acc:HGNC:17296]	protein_coding	567.097	0.442514	0.194335	0.239056	0.223367	2.27707	0.0227821	0.23695	454.073	465.517	493.762	783.834	586.744	547.882	637.865
TMEM160	ENSG00000130748	54958	transmembrane protein 160 [Source:HGNC Symbol;Acc:HGNC:26042]	protein_coding	563.815	0.558999	0.24544	0.234987	0.309904	2.27754	0.0227537	0.23695	592.343	302.586	438.999	818.968	586.744	527.477	679.588
ZNF143	ENSG00000166478	7702	zinc finger protein 143 [Source:HGNC Symbol;Acc:HGNC:12928]	protein_coding	273.27	-0.644186	0.282906	-0.212361	0.337116	-2.27703	0.0227843	0.23695	225.329	450.97	352.815	212.011	259.053	209.154	203.56
ADCY9	ENSG00000162104	115	adenylate cyclase 9 [Source:HGNC Symbol;Acc:HGNC:240]	protein_coding	546.21	-0.50987	0.223986	-0.245604	0.267742	-2.27635	0.0228253	0.23719	457.487	836.476	675.107	433.714	520.32	472.382	427.983
VPS25	ENSG00000131475	84313	vacuolar protein sorting 25 homolog [Source:HGNC Symbol;Acc:HGNC:28122]	protein_coding	2444.51	0.302404	0.132867	0.204116	0.13822	2.27599	0.0228466	0.237227	2207.2	1873.71	2401.48	2954.83	2651.42	2548.62	2474.33
GRIPAP1	ENSG00000068400	56850	GRIP1 associated protein 1 [Source:HGNC Symbol;Acc:HGNC:18706]	protein_coding	660.49	-0.490356	0.215487	-0.246883	0.254045	-2.27558	0.0228713	0.237299	536.011	1013.95	816.054	582.727	575.674	577.47	521.545
QPRT	ENSG00000103485	23475	quinolinate phosphoribosyltransferase [Source:HGNC Symbol;Acc:HGNC:9755]	protein_coding	1104.08	0.3826	0.168288	0.232277	0.184536	2.27349	0.0229969	0.238416	1104.45	769.558	954.307	1136.38	1117.03	1387.56	1259.29
NQO1	ENSG00000181019	1728	NAD(P)H quinone dehydrogenase 1 [Source:HGNC Symbol;Acc:HGNC:2874]	protein_coding	128.717	0.78634	0.346138	0.134566	0.228426	2.27176	0.0231013	0.239312	110.958	64.0086	99.2013	158.705	161.631	150.999	155.515
WRN	ENSG00000165392	7486	WRN RecQ like helicase [Source:HGNC Symbol;Acc:HGNC:12791]	protein_coding	370.551	-0.54594	0.240564	-0.243308	0.295743	-2.26941	0.0232432	0.240595	351.65	544.073	456.505	352.544	345.404	250.985	292.697
SYT14	ENSG00000143469	255928	synaptotagmin 14 [Source:HGNC Symbol;Acc:HGNC:23143]	protein_coding	9.66632	3.88309	1.71144	0.0076631	0.129255	2.2689	0.0232744	0.240731	0	0	13.4662	23.0183	22.1413	7.14185	1.89653
ARL14EP	ENSG00000152219	120534	ADP ribosylation factor like GTPase 14 effector protein [Source:HGNC Symbol;Acc:HGNC:26798]	protein_coding	410.502	0.545285	0.240405	0.233395	0.298723	2.2682	0.0233172	0.240827	361.893	280.765	334.412	627.552	418.47	369.336	481.085
AKR1B1	ENSG00000085662	231	aldo-keto reductase family 1 member B [Source:HGNC Symbol;Acc:HGNC:381]	protein_coding	2850.19	0.284397	0.125387	0.19778	0.129128	2.26815	0.0233199	0.240827	2507.64	2282.49	2827.46	2925.75	3271.38	3270.97	2865.65
MT-ND4	ENSG00000198886	4538	mitochondrially encoded NADH:ubiquinone oxidoreductase core subunit 4 [Source:HGNC Symbol;Acc:HGNC:7459]	protein_coding	83288.7	0.259439	0.114455	0.187454	0.115676	2.26674	0.0234063	0.241159	84462.6	62543.7	77843.4	88694.4	95413.5	85489	88574.7
CDC26	ENSG00000176386	246184	cell division cycle 26 [Source:HGNC Symbol;Acc:HGNC:17839]	protein_coding	350.404	0.656953	0.289776	0.186573	0.307423	2.2671	0.0233839	0.241159	331.166	199.299	262.143	576.669	377.509	267.309	438.73
TRIM23	ENSG00000113595	373	tripartite motif containing 23 [Source:HGNC Symbol;Acc:HGNC:660]	protein_coding	173.439	0.759253	0.334924	0.14365	0.242848	2.26694	0.0233936	0.241159	83.645	161.476	128.378	237.452	151.668	229.56	221.894
FHAD1	ENSG00000142621	114827	forkhead associated phosphopeptide binding domain 1 [Source:HGNC Symbol;Acc:HGNC:29408]	protein_coding	313.516	-0.491412	0.216841	-0.246743	0.255295	-2.26624	0.023437	0.241289	375.549	382.597	367.179	248.356	284.516	273.431	262.985
TRADD	ENSG00000102871	8717	TNFRSF1A associated via death domain [Source:HGNC Symbol;Acc:HGNC:12030]	protein_coding	151.053	0.897562	0.39616	0.108745	0.193264	2.26565	0.0234727	0.241403	80.2309	125.108	98.7524	238.664	86.351	223.438	204.825
CFAP298-TCP10L	ENSG00000265590	110091775	CFAP298-TCP10L readthrough [Source:HGNC Symbol;Acc:HGNC:54636]	protein_coding	32.3852	-1.81166	0.799687	-0.0463759	0.140146	-2.26546	0.0234843	0.241403	10.2422	94.5581	57.4559	9.69192	27.6766	16.3242	10.747
ATP5PB	ENSG00000116459	515	ATP synthase peripheral stalk-membrane subunit b [Source:HGNC Symbol;Acc:HGNC:840]	protein_coding	3085.14	0.294362	0.13005	0.204716	0.134268	2.26345	0.0236081	0.242042	2948.06	2446.87	2810.4	3799.23	2925.97	3306.68	3358.75
NAP1L3	ENSG00000186310	4675	nucleosome assembly protein 1 like 3 [Source:HGNC Symbol;Acc:HGNC:7639]	protein_coding	202.424	-0.659019	0.291117	-0.199493	0.323776	-2.26376	0.0235886	0.242042	220.208	290.948	255.41	151.436	211.449	132.634	154.883
PLEKHH2	ENSG00000152527	130271	pleckstrin homology, MyTH4 and FERM domain containing H2 [Source:HGNC Symbol;Acc:HGNC:30506]	protein_coding	295.372	-0.547939	0.242101	-0.240074	0.295859	-2.26327	0.0236191	0.242042	353.357	369.504	356.855	255.624	297.8	194.871	239.594
RAP2C	ENSG00000123728	57826	RAP2C, member of RAS oncogene family [Source:HGNC Symbol;Acc:HGNC:21165]	protein_coding	778.14	-0.488706	0.215903	-0.243171	0.253272	-2.26355	0.023602	0.242042	780.117	1047.41	958.796	831.082	756.125	457.079	616.371
MRPL34	ENSG00000130312	64981	mitochondrial ribosomal protein L34 [Source:HGNC Symbol;Acc:HGNC:14488]	protein_coding	620.295	0.47381	0.209418	0.240298	0.247248	2.2625	0.0236663	0.242338	612.827	398.599	514.859	746.278	552.425	790.705	726.369
UQCRHL	ENSG00000233954	440567	ubiquinol-cytochrome c reductase hinge protein like [Source:HGNC Symbol;Acc:HGNC:51714]	protein_coding	179.218	0.727433	0.321606	0.151729	0.254339	2.26188	0.023705	0.242549	143.391	112.015	136.458	291.969	153.882	199.972	216.836
SLC1A5	ENSG00000105281	6510	solute carrier family 1 member 5 [Source:HGNC Symbol;Acc:HGNC:10943]	protein_coding	3543.97	0.251519	0.111267	0.175309	0.110916	2.26049	0.0237906	0.243237	3168.27	3182.97	3248.06	3456.38	3767.34	4125.95	3858.8
PTTG1	ENSG00000164611	9232	PTTG1 regulator of sister chromatid separation, securin [Source:HGNC Symbol;Acc:HGNC:9690]	protein_coding	2614.95	0.346794	0.153539	0.218017	0.163409	2.25867	0.0239039	0.244209	2702.24	1812.61	2283.42	3318.27	2643.67	2614.94	2929.5
KIF13B	ENSG00000197892	23303	kinesin family member 13B [Source:HGNC Symbol;Acc:HGNC:14405]	protein_coding	181.798	-0.755092	0.334412	-0.154368	0.259665	-2.25797	0.0239476	0.244413	247.521	224.03	237.455	84.8043	149.454	200.992	128.332
IGF2R	ENSG00000197081	3482	insulin like growth factor 2 receptor [Source:HGNC Symbol;Acc:HGNC:5467]	protein_coding	1038.44	-0.416242	0.184361	-0.235526	0.204256	-2.25776	0.0239606	0.244413	914.974	1472.2	1238.44	845.62	1062.78	896.813	838.264
ATP6V1D	ENSG00000100554	51382	ATPase H+ transporting V1 subunit D [Source:HGNC Symbol;Acc:HGNC:13527]	protein_coding	804.255	0.531494	0.23569	0.234444	0.290162	2.25506	0.0241298	0.24561	652.089	648.814	624.384	1366.56	700.772	656.03	981.136
HK2	ENSG00000159399	3099	hexokinase 2 [Source:HGNC Symbol;Acc:HGNC:4923]	protein_coding	454.64	-0.759846	0.336914	-0.14238	0.236761	-2.25531	0.0241137	0.24561	266.298	853.933	649.521	290.758	544.676	292.816	284.479
CBL	ENSG00000110395	867	Cbl proto-oncogene [Source:HGNC Symbol;Acc:HGNC:1541]	protein_coding	899.154	-0.338444	0.150086	-0.217203	0.157275	-2.255	0.0241333	0.24561	940.579	1096.87	1022.54	799.584	860.189	786.624	787.69
BOK	ENSG00000176720	666	BCL2 family apoptosis regulator BOK [Source:HGNC Symbol;Acc:HGNC:1087]	protein_coding	27.162	1.99845	0.886387	0.0369123	0.136093	2.25461	0.024158	0.245674	22.1915	1.45474	7.18199	14.5379	53.1391	39.7903	51.8384
CIT	ENSG00000122966	11113	citron rho-interacting serine/threonine kinase [Source:HGNC Symbol;Acc:HGNC:1985]	protein_coding	865.156	-0.359558	0.159589	-0.223356	0.169596	-2.25302	0.0242576	0.246441	899.61	1076.51	989.319	766.873	866.832	709.084	747.863
NAA35	ENSG00000135040	60560	N-alpha-acetyltransferase 35, NatC auxiliary subunit [Source:HGNC Symbol;Acc:HGNC:24340]	protein_coding	569.799	-0.441014	0.195761	-0.239138	0.220834	-2.25282	0.0242705	0.246441	544.546	782.65	681.84	453.097	498.179	556.044	472.235
TSPAN2	ENSG00000134198	10100	tetraspanin 2 [Source:HGNC Symbol;Acc:HGNC:20659]	protein_coding	60.1251	-1.13112	0.503191	-0.0837749	0.166158	-2.24789	0.0245829	0.249044	112.665	64.0086	84.3884	52.0941	44.2826	25.5066	37.9305
ALKBH5	ENSG00000091542	54890	alkB homolog 5, RNA demethylase [Source:HGNC Symbol;Acc:HGNC:25996]	protein_coding	2801.64	-0.27203	0.120996	-0.191667	0.121997	-2.24826	0.0245598	0.249044	3183.63	2995.31	3134.49	2622.88	2301.59	2872.04	2501.52
SAFB2	ENSG00000130254	9667	scaffold attachment factor B2 [Source:HGNC Symbol;Acc:HGNC:21605]	protein_coding	947.933	-0.360312	0.16028	-0.222397	0.1703	-2.24801	0.0245754	0.249044	1044.71	1114.33	1091.66	726.894	857.975	987.616	812.345
HMX1	ENSG00000215612	3166	H6 family homeobox 1 [Source:HGNC Symbol;Acc:HGNC:5017]	protein_coding	320.733	0.530789	0.236226	0.227451	0.286359	2.24696	0.0246426	0.249377	288.49	206.573	273.813	398.58	395.222	318.323	364.133
PCLAF	ENSG00000166803	9768	PCNA clamp associated factor [Source:HGNC Symbol;Acc:HGNC:28961]	protein_coding	318.634	0.572783	0.254967	0.212105	0.302434	2.2465	0.0246719	0.249377	274.833	213.847	260.347	371.928	464.967	273.431	371.087
RTF1	ENSG00000137815	23168	RTF1 homolog, Paf1/RNA polymerase II complex component [Source:HGNC Symbol;Acc:HGNC:28996]	protein_coding	1321.95	-0.291875	0.129916	-0.19971	0.132318	-2.24664	0.0246629	0.249377	1439.03	1507.11	1479.94	1203.01	1164.63	1278.39	1181.54
MRPL18	ENSG00000112110	29074	mitochondrial ribosomal protein L18 [Source:HGNC Symbol;Acc:HGNC:14477]	protein_coding	1799	0.385603	0.171781	0.228806	0.188441	2.24474	0.0247849	0.25014	1864.09	1201.62	1532.46	2397.54	1797.87	1751.79	2047.62
PDCD11	ENSG00000148843	22984	programmed cell death 11 [Source:HGNC Symbol;Acc:HGNC:13408]	protein_coding	1154.55	-0.337365	0.150291	-0.215218	0.157231	-2.24474	0.0247846	0.25014	1208.58	1398.01	1321.04	1141.22	902.258	1104.95	1005.79
HOXB3	ENSG00000120093	3213	homeobox B3 [Source:HGNC Symbol;Acc:HGNC:5114]	protein_coding	204.961	-0.58715	0.261617	-0.222622	0.314303	-2.24431	0.0248124	0.250227	244.107	267.672	247.779	155.071	171.595	181.607	166.894
EMC2	ENSG00000104412	9694	ER membrane protein complex subunit 2 [Source:HGNC Symbol;Acc:HGNC:28963]	protein_coding	468.918	0.570499	0.254286	0.216083	0.306199	2.24353	0.0248628	0.250357	426.76	309.86	366.73	758.393	477.145	376.478	567.061
CCDC57	ENSG00000176155	284001	coiled-coil domain containing 57 [Source:HGNC Symbol;Acc:HGNC:27564]	protein_coding	321.928	-0.568601	0.253411	-0.226315	0.304931	-2.24379	0.0248457	0.250357	303.853	480.064	399.498	306.507	296.693	215.276	251.606
MLF1	ENSG00000178053	4291	myeloid leukemia factor 1 [Source:HGNC Symbol;Acc:HGNC:7125]	protein_coding	652.91	0.434289	0.193749	0.232907	0.220222	2.2415	0.0249939	0.250532	510.405	564.439	558.4	799.584	836.941	554.004	746.599
AFMID	ENSG00000183077	125061	arylformamidase [Source:HGNC Symbol;Acc:HGNC:20910]	protein_coding	735.097	0.423449	0.188824	0.231607	0.212986	2.24256	0.024925	0.250532	737.441	471.336	640.095	898.926	769.41	806.009	822.46
ARF5	ENSG00000004059	381	ADP ribosylation factor 5 [Source:HGNC Symbol;Acc:HGNC:658]	protein_coding	1474.35	0.356908	0.159268	0.219624	0.170567	2.24093	0.0250306	0.250532	1529.51	996.497	1291.86	1648.84	1531.07	1670.17	1652.51
C3orf20	ENSG00000131379	84077	chromosome 3 open reading frame 20 [Source:HGNC Symbol;Acc:HGNC:25320]	protein_coding	14.8254	-3.60476	1.60818	-0.0102567	0.12955	-2.24151	0.0249928	0.250532	18.7774	33.459	0	1.21149	0	1.02026	49.3097
SLC25A18	ENSG00000182902	83733	solute carrier family 25 member 18 [Source:HGNC Symbol;Acc:HGNC:10988]	protein_coding	7.07218	-3.78525	1.6883	-0.0167743	0.130447	-2.24205	0.024958	0.250532	3.41408	21.8211	18.4039	4.84596	0	1.02026	0
DEPDC4	ENSG00000166153	120863	DEP domain containing 4 [Source:HGNC Symbol;Acc:HGNC:22952]	protein_coding	111.671	-0.881087	0.392876	-0.117418	0.203658	-2.24266	0.0249188	0.250532	208.259	96.0129	148.577	82.3813	69.7451	98.9657	77.7576
RANBP10	ENSG00000141084	57610	RAN binding protein 10 [Source:HGNC Symbol;Acc:HGNC:29285]	protein_coding	340.481	-0.615546	0.274665	-0.205788	0.312838	-2.24108	0.025021	0.250532	356.771	474.245	439.897	187.781	396.329	275.471	252.87
MARK2	ENSG00000072518	2011	microtubule affinity regulating kinase 2 [Source:HGNC Symbol;Acc:HGNC:3332]	protein_coding	606.946	-0.393124	0.175336	-0.228943	0.190228	-2.24212	0.0249538	0.250532	715.25	691.002	699.795	476.116	608.885	536.659	520.912
MRPS7	ENSG00000125445	51081	mitochondrial ribosomal protein S7 [Source:HGNC Symbol;Acc:HGNC:14499]	protein_coding	1671.7	0.324558	0.144969	0.208882	0.152557	2.23881	0.0251684	0.250593	1541.46	1230.71	1618.19	2029.25	1837.73	1731.39	1713.19
UQCRFS1	ENSG00000169021	7386	ubiquinol-cytochrome c reductase, Rieske iron-sulfur polypeptide 1 [Source:HGNC Symbol;Acc:HGNC:12587]	protein_coding	1681.96	0.318795	0.142378	0.208055	0.148756	2.23908	0.0251509	0.250593	1398.07	1476.56	1550.86	2177.05	1709.31	1653.85	1808.02
RSKR	ENSG00000167524	124923	ribosomal protein S6 kinase related [Source:HGNC Symbol;Acc:HGNC:26314]	protein_coding	101.06	-0.948025	0.423272	-0.104259	0.187119	-2.23975	0.0251069	0.250593	87.059	190.571	138.702	96.9192	76.3875	52.0335	65.7462
CDK5RAP3	ENSG00000108465	80279	CDK5 regulatory subunit associated protein 3 [Source:HGNC Symbol;Acc:HGNC:18673]	protein_coding	225.823	-0.664425	0.296616	-0.184005	0.297949	-2.24002	0.0250896	0.250593	223.622	343.319	289.075	176.878	241.34	137.736	168.791
MCFD2	ENSG00000180398	90411	multiple coagulation factor deficiency 2, ER cargo receptor complex subunit [Source:HGNC Symbol;Acc:HGNC:18451]	protein_coding	1640.99	-0.27001	0.120598	-0.190399	0.121369	-2.23892	0.0251609	0.250593	1804.34	1828.61	1818.39	1567.67	1495.64	1488.57	1483.72
GTF3C3	ENSG00000119041	9330	general transcription factor IIIC subunit 3 [Source:HGNC Symbol;Acc:HGNC:4666]	protein_coding	900.444	-0.407941	0.182133	-0.231193	0.199852	-2.2398	0.0251041	0.250593	880.833	1192.89	1064.28	965.558	779.373	667.253	752.921
KDM7A	ENSG00000006459	80853	lysine demethylase 7A [Source:HGNC Symbol;Acc:HGNC:22224]	protein_coding	373.405	-0.523257	0.233643	-0.234782	0.277553	-2.23956	0.0251197	0.250593	450.659	452.424	450.221	411.907	298.907	246.904	302.812
EPS8L1	ENSG00000131037	54869	EPS8 like 1 [Source:HGNC Symbol;Acc:HGNC:21295]	protein_coding	73.6624	1.01847	0.455114	0.0868631	0.168792	2.23784	0.0252316	0.250847	49.5042	39.278	51.1717	87.2273	127.312	66.3172	94.8263
PAXBP1	ENSG00000159086	94104	PAX3 and PAX7 binding protein 1 [Source:HGNC Symbol;Acc:HGNC:13579]	protein_coding	1169.68	-0.348446	0.155698	-0.217493	0.163927	-2.23796	0.0252236	0.250847	1136.89	1507.11	1349.32	1176.36	972.003	1039.65	1006.42
LRBA	ENSG00000198589	987	LPS responsive beige-like anchor protein [Source:HGNC Symbol;Acc:HGNC:1742]	protein_coding	559.148	-0.426695	0.190728	-0.23382	0.212035	-2.2372	0.0252736	0.251077	611.12	695.366	655.357	466.424	588.958	426.471	470.338
TMEM186	ENSG00000184857	25880	transmembrane protein 186 [Source:HGNC Symbol;Acc:HGNC:24530]	protein_coding	253.861	0.612834	0.274046	0.194048	0.302136	2.23625	0.0253356	0.251082	201.431	178.933	206.482	367.082	208.128	307.1	307.869
GALNT14	ENSG00000158089	79623	polypeptide N-acetylgalactosaminyltransferase 14 [Source:HGNC Symbol;Acc:HGNC:22946]	protein_coding	16.2676	-3.43301	1.53531	-0.0108869	0.129616	-2.23603	0.0253495	0.251082	6.82816	58.1896	0	1.21149	1.10706	1.02026	45.5166
UBE2F	ENSG00000184182	140739	ubiquitin conjugating enzyme E2 F (putative) [Source:HGNC Symbol;Acc:HGNC:12480]	protein_coding	158.356	-0.74681	0.333977	-0.150881	0.2518	-2.23611	0.0253444	0.251082	204.845	208.028	203.34	104.188	94.1005	179.567	114.424
LIMK2	ENSG00000182541	3985	LIM domain kinase 2 [Source:HGNC Symbol;Acc:HGNC:6614]	protein_coding	412.501	-0.545091	0.243746	-0.228016	0.290263	-2.2363	0.025332	0.251082	378.963	608.082	518.001	272.585	428.434	362.194	319.248
BOLA1	ENSG00000178096	51027	bolA family member 1 [Source:HGNC Symbol;Acc:HGNC:24263]	protein_coding	438.397	0.560938	0.250982	0.214648	0.298714	2.23498	0.0254187	0.251395	428.467	260.399	347.878	663.897	393.008	447.896	527.234
H2AC19	ENSG00000272196	723790	H2A clustered histone 19 [Source:HGNC Symbol;Acc:HGNC:29668]	protein_coding	382.633	0.69924	0.312859	0.151368	0.2494	2.235	0.0254172	0.251395	425.053	151.293	272.916	462.789	546.89	316.282	503.211
OAZ1	ENSG00000104904	4946	ornithine decarboxylase antizyme 1 [Source:HGNC Symbol;Acc:HGNC:8095]	protein_coding	9423.65	0.246013	0.110092	0.179967	0.110396	2.23461	0.025443	0.251447	9192.41	7477.37	8917.79	10603	9416.69	10428.1	9930.21
TRIM66	ENSG00000166436	9866	tripartite motif containing 66 [Source:HGNC Symbol;Acc:HGNC:29005]	protein_coding	129.019	-0.946079	0.423463	-0.102676	0.185074	-2.23415	0.0254734	0.251561	107.544	238.577	184.487	56.9401	149.454	87.7427	78.3897
AP2S1	ENSG00000042753	1175	adaptor related protein complex 2 subunit sigma 1 [Source:HGNC Symbol;Acc:HGNC:565]	protein_coding	2182.58	0.39821	0.178301	0.229827	0.197187	2.23336	0.0255249	0.251746	2406.93	1338.36	1803.13	2481.13	2061.35	2631.26	2555.88
MRPL37	ENSG00000116221	51253	mitochondrial ribosomal protein L37 [Source:HGNC Symbol;Acc:HGNC:14034]	protein_coding	5565.36	0.305852	0.136969	0.201378	0.142919	2.233	0.0255488	0.251746	5081.86	4025.27	5642.35	6944.26	5768.91	6069.55	5425.33
ORC1	ENSG00000085840	4998	origin recognition complex subunit 1 [Source:HGNC Symbol;Acc:HGNC:8487]	protein_coding	576.853	-0.420245	0.188191	-0.232007	0.208036	-2.23308	0.0255438	0.251746	713.543	631.357	676.005	473.693	447.254	608.078	488.039
HUS1	ENSG00000136273	3364	HUS1 checkpoint clamp component [Source:HGNC Symbol;Acc:HGNC:5309]	protein_coding	246.248	0.639335	0.286376	0.165433	0.264051	2.2325	0.0255818	0.251794	187.774	138.2	236.557	353.755	305.55	259.147	242.755
RCBTB2	ENSG00000136161	1102	RCC1 and BTB domain containing protein 2 [Source:HGNC Symbol;Acc:HGNC:1914]	protein_coding	34.4435	1.82495	0.817499	0.0407817	0.137645	2.23236	0.0255914	0.251794	10.2422	20.3664	11.6707	96.9192	34.319	8.16212	59.4245
ARNT2	ENSG00000172379	9915	aryl hydrocarbon receptor nuclear translocator 2 [Source:HGNC Symbol;Acc:HGNC:16876]	protein_coding	379.084	-0.552394	0.247597	-0.225422	0.294067	-2.23103	0.0256794	0.252473	556.495	365.14	465.932	244.721	400.757	323.424	297.122
N6AMT1	ENSG00000156239	29104	N-6 adenine-specific DNA methyltransferase 1 [Source:HGNC Symbol;Acc:HGNC:16021]	protein_coding	189.931	0.721762	0.323803	0.144642	0.240613	2.22902	0.0258129	0.253598	182.653	90.1939	144.538	264.105	234.698	177.526	235.801
PRELID3A	ENSG00000141391	10650	PRELI domain containing 3A [Source:HGNC Symbol;Acc:HGNC:24639]	protein_coding	44.8364	-1.69793	0.761927	-0.0469954	0.140296	-2.22847	0.0258494	0.253769	56.3323	80.0107	82.5929	13.3264	4.42826	63.2564	13.9079
C2orf81	ENSG00000284308	388963	chromosome 2 open reading frame 81 [Source:HGNC Symbol;Acc:HGNC:34350]	protein_coding	7.12198	-3.58425	1.60899	-0.0173085	0.130508	-2.22765	0.0259041	0.254051	1.70704	17.4569	25.137	1.21149	3.32119	1.02026	0
SH3PXD2A	ENSG00000107957	9644	SH3 and PX domains 2A [Source:HGNC Symbol;Acc:HGNC:23664]	protein_coding	837.985	-0.420222	0.188655	-0.231308	0.208719	-2.22747	0.0259161	0.254051	829.621	1098.33	1005.03	581.515	879.009	784.583	687.807
CDKAL1	ENSG00000145996	54901	CDK5 regulatory subunit associated protein 1 like 1 [Source:HGNC Symbol;Acc:HGNC:21050]	protein_coding	178.021	0.974793	0.43789	0.0896083	0.171265	2.22611	0.0260065	0.254749	141.684	101.832	101.895	73.9009	365.331	192.83	268.674
SYVN1	ENSG00000162298	84447	synoviolin 1 [Source:HGNC Symbol;Acc:HGNC:20738]	protein_coding	408.252	-0.554855	0.249332	-0.222606	0.294761	-2.22536	0.0260568	0.255054	481.385	498.976	514.859	238.664	333.226	476.464	314.191
SPAG7	ENSG00000091640	9552	sperm associated antigen 7 [Source:HGNC Symbol;Acc:HGNC:11216]	protein_coding	912.177	0.366834	0.165001	0.215163	0.176969	2.22322	0.0262013	0.25628	875.712	653.178	822.787	1106.09	996.358	933.542	997.572
APRT	ENSG00000198931	353	adenine phosphoribosyltransferase [Source:HGNC Symbol;Acc:HGNC:626]	protein_coding	3992.49	0.325552	0.146468	0.208773	0.153228	2.22268	0.0262371	0.256443	4247.12	2726.18	3502.12	4758.73	4046.32	4199.41	4467.58
PDXK	ENSG00000160209	8566	pyridoxal kinase [Source:HGNC Symbol;Acc:HGNC:8819]	protein_coding	1793.27	0.27312	0.122922	0.189252	0.124574	2.22189	0.0262905	0.25647	1544.87	1601.67	1666.22	1960.19	1801.19	2048.69	1930.03
HTRA3	ENSG00000170801	94031	HtrA serine peptidase 3 [Source:HGNC Symbol;Acc:HGNC:30406]	protein_coding	56.0679	1.09385	0.492445	0.0773306	0.160169	2.22125	0.0263338	0.25647	30.7267	32.0043	39.9498	76.3239	59.7815	81.6212	72.068
GOLGA8Q	ENSG00000178115	727909	golgin A8 family member Q [Source:HGNC Symbol;Acc:HGNC:44408]	protein_coding	48.0357	-1.33861	0.6027	-0.0651413	0.15102	-2.22102	0.0263494	0.25647	40.969	104.741	73.1665	30.2873	15.4989	46.9322	24.6548
PARP1	ENSG00000143799	142	poly(ADP-ribose) polymerase 1 [Source:HGNC Symbol;Acc:HGNC:270]	protein_coding	6728.36	-0.242946	0.109348	-0.177173	0.108625	-2.22176	0.0262992	0.25647	6508.94	8117.45	7501.14	6275.52	6335.73	6338.9	6020.84
PLEKHG2	ENSG00000090924	64857	pleckstrin homology and RhoGEF domain containing G2 [Source:HGNC Symbol;Acc:HGNC:29515]	protein_coding	311.477	-0.566768	0.255194	-0.216496	0.296943	-2.22093	0.0263555	0.25647	389.205	375.323	380.197	237.452	353.154	200.992	244.02
TUB	ENSG00000166402	7275	TUB bipartite transcription factor [Source:HGNC Symbol;Acc:HGNC:12406]	protein_coding	716.021	-0.356221	0.160315	-0.218547	0.168984	-2.222	0.026283	0.25647	781.824	891.756	781.042	615.437	656.489	632.564	653.037
AAMP	ENSG00000127837	14	angio associated migratory cell protein [Source:HGNC Symbol;Acc:HGNC:18]	protein_coding	2481.54	0.376159	0.169438	0.22425	0.183884	2.22004	0.026416	0.256756	2183.3	2138.47	2048.66	2221.87	2220.77	3603.57	2954.15
MRFAP1	ENSG00000179010	93621	Morf4 family associated protein 1 [Source:HGNC Symbol;Acc:HGNC:24549]	protein_coding	8121.31	0.272192	0.122613	0.189877	0.124514	2.21993	0.0264234	0.256756	8137.46	6047.36	7622.79	9563.51	8249.84	8637.56	8590.63
THAP1	ENSG00000131931	55145	THAP domain containing 1 [Source:HGNC Symbol;Acc:HGNC:20856]	protein_coding	214.918	0.807717	0.363974	0.119466	0.205581	2.21916	0.026476	0.257079	157.048	149.838	145.435	425.233	138.383	198.952	289.536
HLA-C	ENSG00000204525	3107	major histocompatibility complex, class I, C [Source:HGNC Symbol;Acc:HGNC:4933]	protein_coding	3106.72	0.277779	0.125205	0.190358	0.126896	2.2186	0.0265141	0.257262	2946.35	2583.62	2792.45	2973	3219.34	3796.4	3435.87
SSR2	ENSG00000163479	6746	signal sequence receptor subunit 2 [Source:HGNC Symbol;Acc:HGNC:11324]	protein_coding	3046.62	0.282027	0.127136	0.193887	0.129373	2.21831	0.0265336	0.257264	2639.08	2784.37	2722.87	3188.64	2826.34	3765.8	3399.21
METTL5	ENSG00000138382	29081	methyltransferase like 5 [Source:HGNC Symbol;Acc:HGNC:25006]	protein_coding	1004.86	0.414077	0.186713	0.227911	0.208447	2.21771	0.0265744	0.257429	874.005	807.381	854.657	1457.42	1027.36	865.184	1148.03
DCTPP1	ENSG00000179958	79077	dCTP pyrophosphatase 1 [Source:HGNC Symbol;Acc:HGNC:28777]	protein_coding	2117.75	0.324005	0.146119	0.203352	0.154012	2.21741	0.0265954	0.257429	1811.17	1571.12	2187.37	2347.87	2477.61	2401.7	2027.39
MAT2A	ENSG00000168906	4144	methionine adenosyltransferase 2A [Source:HGNC Symbol;Acc:HGNC:6904]	protein_coding	2399.79	-0.258851	0.116746	-0.183903	0.116447	-2.21721	0.0266085	0.257429	2504.23	2864.38	2573.85	2180.68	2298.27	2135.41	2241.69
BNIP1	ENSG00000113734	662	BCL2 interacting protein 1 [Source:HGNC Symbol;Acc:HGNC:1082]	protein_coding	439.503	0.458127	0.206784	0.221897	0.237472	2.21548	0.0267268	0.258385	329.459	336.045	422.84	474.904	560.175	502.99	450.109
BANF1	ENSG00000175334	8815	BAF nuclear assembly factor 1 [Source:HGNC Symbol;Acc:HGNC:17397]	protein_coding	2984.95	0.322741	0.145773	0.207812	0.152228	2.214	0.0268288	0.258808	3156.32	2059.91	2626.81	3315.85	3020.07	3374.01	3341.68
TGM2	ENSG00000198959	7052	transglutaminase 2 [Source:HGNC Symbol;Acc:HGNC:11778]	protein_coding	64.7813	-1.20881	0.545967	-0.0729315	0.156644	-2.21407	0.0268238	0.258808	66.5746	122.198	96.9569	21.8068	77.4945	33.6687	34.7696
ANKRD11	ENSG00000167522	29123	ankyrin repeat domain 11 [Source:HGNC Symbol;Acc:HGNC:21316]	protein_coding	1919.34	-0.351829	0.158871	-0.214721	0.167281	-2.21456	0.0267903	0.258808	1891.4	2414.87	2254.25	1465.9	2147.71	1646.71	1614.58
APAF1	ENSG00000120868	317	apoptotic peptidase activating factor 1 [Source:HGNC Symbol;Acc:HGNC:576]	protein_coding	423.355	-0.544093	0.245895	-0.219332	0.28586	-2.2127	0.0269184	0.259484	396.033	613.9	534.61	364.659	270.124	456.058	328.099
ELOB	ENSG00000103363	6923	elongin B [Source:HGNC Symbol;Acc:HGNC:11619]	protein_coding	3110.75	0.36597	0.165428	0.217322	0.179666	2.21226	0.0269484	0.259555	3047.07	1930.44	3052.35	3976.11	3535.96	3136.29	3097.03
SERPINE2	ENSG00000135919	5270	serpin family E member 2 [Source:HGNC Symbol;Acc:HGNC:8951]	protein_coding	234.143	0.657428	0.297206	0.162031	0.261468	2.21203	0.0269648	0.259555	225.329	122.198	183.141	296.815	208.128	313.221	290.168
ACOT8	ENSG00000101473	10005	acyl-CoA thioesterase 8 [Source:HGNC Symbol;Acc:HGNC:15919]	protein_coding	501.702	0.506567	0.229228	0.220156	0.268263	2.20988	0.0271133	0.26016	489.921	312.769	413.413	723.26	500.393	483.605	588.555
PLEKHN1	ENSG00000187583	84069	pleckstrin homology domain containing N1 [Source:HGNC Symbol;Acc:HGNC:25284]	protein_coding	15.8798	-3.53319	1.59894	-0.0101353	0.129538	-2.20971	0.0271253	0.26016	1.70704	66.9181	0	1.21149	1.10706	1.02026	39.1949
KLK1	ENSG00000167748	3816	kallikrein 1 [Source:HGNC Symbol;Acc:HGNC:6357]	protein_coding	15.8798	-3.53319	1.59894	-0.0101353	0.129538	-2.20971	0.0271253	0.26016	1.70704	66.9181	0	1.21149	1.10706	1.02026	39.1949
SRSF6	ENSG00000124193	6431	serine and arginine rich splicing factor 6 [Source:HGNC Symbol;Acc:HGNC:10788]	protein_coding	1675.89	-0.332601	0.150482	-0.209459	0.156508	-2.21023	0.027089	0.26016	1526.09	2224.3	1938.24	1509.52	1595.28	1505.91	1431.88
DOCK6	ENSG00000130158	57572	dedicator of cytokinesis 6 [Source:HGNC Symbol;Acc:HGNC:19189]	protein_coding	408.087	-0.478127	0.216342	-0.228677	0.24676	-2.21006	0.0271012	0.26016	419.932	546.982	490.171	296.815	359.796	409.126	333.789
AKAP6	ENSG00000151320	9472	A-kinase anchoring protein 6 [Source:HGNC Symbol;Acc:HGNC:376]	protein_coding	51.3772	-1.10727	0.501327	-0.0826092	0.164753	-2.20868	0.0271968	0.260472	75.1098	78.556	68.2289	31.4988	29.8907	42.8511	33.5053
CEP95	ENSG00000258890	90799	centrosomal protein 95 [Source:HGNC Symbol;Acc:HGNC:25141]	protein_coding	976.153	-0.385599	0.174577	-0.221154	0.187439	-2.20876	0.0271913	0.260472	1090.8	1149.24	1136.55	1023.71	935.47	667.253	830.046
KANTR	ENSG00000232593		KDM5C adjacent transcript [Source:HGNC Symbol;Acc:HGNC:49510]	protein_coding	188.112	-0.767335	0.347508	-0.136219	0.22762	-2.2081	0.027237	0.260482	276.54	210.937	248.228	235.029	112.921	101.006	132.125
DHX37	ENSG00000150990	57647	DEAH-box helicase 37 [Source:HGNC Symbol;Acc:HGNC:17210]	protein_coding	596.763	-0.473539	0.214433	-0.22808	0.243977	-2.20833	0.0272209	0.260482	706.715	695.366	724.932	413.118	453.896	706.023	477.292
NDUFC1	ENSG00000109390	4717	NADH:ubiquinone oxidoreductase subunit C1 [Source:HGNC Symbol;Acc:HGNC:7705]	protein_coding	1156.91	0.393093	0.1781	0.220992	0.194975	2.20715	0.0273033	0.260929	1191.51	749.191	1007.27	1453.79	1270.91	1133.51	1292.17
POLR2J	ENSG00000005075	5439	RNA polymerase II subunit J [Source:HGNC Symbol;Acc:HGNC:9197]	protein_coding	1114.7	0.424127	0.192222	0.22566	0.215346	2.20644	0.0273533	0.261219	1220.53	653.178	929.619	1281.76	1191.2	1224.32	1302.28
C7orf31	ENSG00000153790	136895	chromosome 7 open reading frame 31 [Source:HGNC Symbol;Acc:HGNC:21722]	protein_coding	143.309	-0.7718	0.349928	-0.136715	0.229069	-2.2056	0.027412	0.261592	129.735	242.942	188.976	87.2273	128.419	123.452	102.412
CEBPD	ENSG00000221869	1052	CCAAT enhancer binding protein delta [Source:HGNC Symbol;Acc:HGNC:1835]	protein_coding	67.6463	1.07538	0.487883	0.0777914	0.160494	2.20418	0.027512	0.262341	32.4338	48.0064	44.4386	49.6711	98.5287	108.148	92.2976
C6orf226	ENSG00000221821	441150	chromosome 6 open reading frame 226 [Source:HGNC Symbol;Acc:HGNC:34431]	protein_coding	21.2796	-2.75893	1.25183	-0.0200184	0.130873	-2.20392	0.0275299	0.262341	27.3126	13.0927	85.2862	1.21149	21.0342	1.02026	0
DBT	ENSG00000137992	1629	dihydrolipoamide branched chain transacylase E2 [Source:HGNC Symbol;Acc:HGNC:2698]	protein_coding	315.64	0.530678	0.24089	0.211908	0.278571	2.20299	0.0275953	0.262589	189.481	302.586	264.836	351.332	344.297	379.538	377.409
MRPL10	ENSG00000159111	124995	mitochondrial ribosomal protein L10 [Source:HGNC Symbol;Acc:HGNC:14055]	protein_coding	1907.49	0.268904	0.12205	0.187276	0.123334	2.20323	0.0275783	0.262589	1672.9	1688.95	1766.77	2066.8	1897.51	2201.73	2057.73
NACAD	ENSG00000136274	23148	NAC alpha domain containing [Source:HGNC Symbol;Acc:HGNC:22196]	protein_coding	136.801	-0.937738	0.425827	-0.0995456	0.181053	-2.20216	0.0276542	0.262962	90.4731	273.491	197.056	90.8618	149.454	73.459	82.815
VASP	ENSG00000125753	7408	vasodilator stimulated phosphoprotein [Source:HGNC Symbol;Acc:HGNC:12652]	protein_coding	485.215	0.517183	0.234923	0.216251	0.2734	2.2015	0.0277006	0.263215	460.901	322.952	387.828	444.617	463.86	723.368	592.98
C1D	ENSG00000197223	10438	C1D nuclear receptor corepressor [Source:HGNC Symbol;Acc:HGNC:29911]	protein_coding	338.882	0.560776	0.254826	0.197417	0.281864	2.20062	0.0277631	0.263621	317.509	209.483	274.262	461.578	420.685	289.755	398.903
RPL36A	ENSG00000241343	6173	ribosomal protein L36a [Source:HGNC Symbol;Acc:HGNC:10359]	protein_coding	273.831	-0.670427	0.304939	-0.168581	0.273453	-2.19856	0.027909	0.264818	425.053	260.399	354.611	170.82	329.905	177.526	198.503
PRC1	ENSG00000198901	9055	protein regulator of cytokinesis 1 [Source:HGNC Symbol;Acc:HGNC:9341]	protein_coding	93.5417	1.00492	0.457372	0.0844414	0.166247	2.19716	0.0280089	0.265355	75.1098	43.6422	60.5981	77.5354	183.773	82.6414	131.492
TP53BP2	ENSG00000143514	7159	tumor protein p53 binding protein 2 [Source:HGNC Symbol;Acc:HGNC:12000]	protein_coding	892.623	-0.327447	0.149046	-0.205448	0.153894	-2.19696	0.0280236	0.265355	938.872	1077.96	1009.07	821.391	840.262	774.381	786.426
GPHN	ENSG00000171723	10243	gephyrin [Source:HGNC Symbol;Acc:HGNC:15465]	protein_coding	303.244	-0.515727	0.234749	-0.221119	0.269295	-2.19693	0.0280254	0.265355	317.509	417.511	360.895	289.546	264.588	225.478	247.181
TMEM74	ENSG00000164841	157753	transmembrane protein 74 [Source:HGNC Symbol;Acc:HGNC:26409]	protein_coding	99.7311	-0.887047	0.403831	-0.108652	0.19145	-2.19658	0.0280505	0.265404	119.493	149.838	135.56	46.0366	100.743	77.5401	68.9071
UQCRC2	ENSG00000140740	7385	ubiquinol-cytochrome c reductase core protein 2 [Source:HGNC Symbol;Acc:HGNC:12586]	protein_coding	2693.23	0.244608	0.111411	0.177413	0.111217	2.19554	0.0281249	0.265919	2381.32	2436.69	2498.44	2685.87	2942.58	3001.62	2906.11
FAHD2A	ENSG00000115042	51011	fumarylacetoacetate hydrolase domain containing 2A [Source:HGNC Symbol;Acc:HGNC:24252]	protein_coding	875.868	0.47027	0.214278	0.221922	0.245711	2.19468	0.0281868	0.265938	976.427	477.155	704.733	892.868	1031.78	996.798	1051.31
FLAD1	ENSG00000160688	80308	flavin adenine dinucleotide synthetase 1 [Source:HGNC Symbol;Acc:HGNC:24671]	protein_coding	982.305	0.333659	0.152018	0.205136	0.159018	2.19486	0.0281733	0.265938	913.266	765.194	891.465	988.576	1166.85	1072.3	1078.49
SRSF7	ENSG00000115875	6432	serine and arginine rich splicing factor 7 [Source:HGNC Symbol;Acc:HGNC:10789]	protein_coding	3109.2	0.262837	0.119754	0.1837	0.121141	2.1948	0.0281777	0.265938	2570.8	2732	3080.63	3530.28	3522.68	3192.41	3135.59
NACC2	ENSG00000148411	138151	NACC family member 2 [Source:HGNC Symbol;Acc:HGNC:23846]	protein_coding	299.971	-0.568267	0.259033	-0.204779	0.288177	-2.19381	0.0282494	0.26634	332.873	398.599	371.668	209.588	213.663	340.768	232.64
POLE	ENSG00000177084	5426	DNA polymerase epsilon, catalytic subunit [Source:HGNC Symbol;Acc:HGNC:9177]	protein_coding	1389.58	-0.291408	0.132868	-0.192056	0.134197	-2.19322	0.0282912	0.266545	1561.94	1537.66	1551.31	1190.9	1407.08	1241.66	1236.53
TIMP1	ENSG00000102265	7076	TIMP metallopeptidase inhibitor 1 [Source:HGNC Symbol;Acc:HGNC:11820]	protein_coding	1576.11	0.303197	0.138283	0.1967	0.142608	2.19258	0.0283374	0.266604	1391.24	1265.62	1520.34	1589.48	1727.02	1909.94	1629.12
RAD9A	ENSG00000172613	5883	RAD9 checkpoint clamp component A [Source:HGNC Symbol;Acc:HGNC:9827]	protein_coding	292.347	0.721853	0.329197	0.135629	0.225324	2.19277	0.0283239	0.266604	145.098	290.948	204.238	490.654	326.584	202.012	386.891
SUMO2	ENSG00000188612	6613	small ubiquitin like modifier 2 [Source:HGNC Symbol;Acc:HGNC:11125]	protein_coding	8835.92	0.310419	0.141602	0.195327	0.146378	2.1922	0.0283653	0.266678	8441.31	6309.21	8604.03	11577	9573.89	8398.82	8947.18
HLA-B	ENSG00000234745	3106	major histocompatibility complex, class I, B [Source:HGNC Symbol;Acc:HGNC:4932]	protein_coding	1809.55	0.29643	0.135254	0.195132	0.138553	2.19165	0.0284047	0.266745	1744.6	1395.1	1669.36	2105.57	1804.52	1998.7	1949
PLEKHA6	ENSG00000143850	22874	pleckstrin homology domain containing A6 [Source:HGNC Symbol;Acc:HGNC:17053]	protein_coding	26.3588	-2.98955	1.36413	-0.0127026	0.129814	-2.19154	0.0284125	0.266745	61.4534	14.5474	0	1.21149	2.21413	2.04053	103.045
L1CAM	ENSG00000198910	3897	L1 cell adhesion molecule [Source:HGNC Symbol;Acc:HGNC:6470]	protein_coding	45.5827	-1.83034	0.835312	-0.0394665	0.136808	-2.19121	0.0284368	0.266786	105.836	27.6401	92.917	1.21149	48.7108	32.6485	10.1148
PSAT1	ENSG00000135069	29968	phosphoserine aminotransferase 1 [Source:HGNC Symbol;Acc:HGNC:19129]	protein_coding	2294.79	0.388788	0.177538	0.21611	0.19206	2.18988	0.0285326	0.267294	1705.33	2282.49	1869.11	1835.41	3180.6	2429.25	2761.34
MDC1	ENSG00000137337	9656	mediator of DNA damage checkpoint 1 [Source:HGNC Symbol;Acc:HGNC:21163]	protein_coding	912.998	-0.344829	0.157483	-0.210669	0.164561	-2.18963	0.0285512	0.267294	899.61	1169.61	1043.18	820.179	865.724	804.989	787.69
TMEM120B	ENSG00000188735	144404	transmembrane protein 120B [Source:HGNC Symbol;Acc:HGNC:32008]	protein_coding	395.684	-0.438561	0.200274	-0.223952	0.221446	-2.18981	0.028538	0.267294	438.709	494.612	461.443	323.468	338.762	376.478	336.317
EAPP	ENSG00000129518	55837	E2F associated phosphoprotein [Source:HGNC Symbol;Acc:HGNC:19312]	protein_coding	773.417	0.415873	0.190005	0.22086	0.210708	2.18875	0.0286152	0.267517	754.512	530.98	666.13	1039.46	750.59	794.786	877.459
NAPSA	ENSG00000131400	9476	napsin A aspartic peptidase [Source:HGNC Symbol;Acc:HGNC:13395]	protein_coding	13.6318	2.56036	1.16976	0.0262668	0.132599	2.18878	0.0286126	0.267517	3.41408	4.36422	3.14212	8.48043	45.3896	4.08106	26.5514
SRP9	ENSG00000143742	6726	signal recognition particle 9 [Source:HGNC Symbol;Acc:HGNC:11304]	protein_coding	7183.02	0.308215	0.140855	0.196608	0.145357	2.18818	0.0286566	0.267716	6872.54	5365.08	6756.01	9570.77	7584.5	6601.11	7531.1
PINK1	ENSG00000158828	65018	PTEN induced kinase 1 [Source:HGNC Symbol;Acc:HGNC:14581]	protein_coding	742.424	0.353922	0.16185	0.211106	0.171727	2.18673	0.0287624	0.268328	594.05	664.816	665.681	768.085	783.802	896.813	823.724
CENPQ	ENSG00000031691	55166	centromere protein Q [Source:HGNC Symbol;Acc:HGNC:21347]	protein_coding	242.217	0.591897	0.270653	0.183435	0.278714	2.18693	0.0287479	0.268328	155.341	210.937	197.505	345.275	273.445	228.539	284.479
BNIPL	ENSG00000163141	149428	BCL2 interacting protein like [Source:HGNC Symbol;Acc:HGNC:16976]	protein_coding	23.8689	-1.71702	0.785436	-0.0470907	0.140396	-2.18607	0.0288107	0.268591	29.0197	49.4612	39.9498	18.1724	4.42826	15.304	10.747
TTF2	ENSG00000116830	8458	transcription termination factor 2 [Source:HGNC Symbol;Acc:HGNC:12398]	protein_coding	717.397	-0.415281	0.190012	-0.220908	0.207043	-2.18556	0.0288482	0.268752	665.746	987.769	852.413	592.419	733.984	595.834	593.613
LRCH4	ENSG00000077454	4034	leucine rich repeats and calponin homology domain containing 4 [Source:HGNC Symbol;Acc:HGNC:6691]	protein_coding	53.8438	1.95316	0.894004	0.0328081	0.134461	2.18473	0.0289088	0.269004	40.969	16.0021	6.73312	1.21149	101.85	88.763	121.378
EIF2AK3	ENSG00000172071	9451	eukaryotic translation initiation factor 2 alpha kinase 3 [Source:HGNC Symbol;Acc:HGNC:3255]	protein_coding	326.966	-0.471153	0.215667	-0.224032	0.242968	-2.18463	0.0289157	0.269004	358.478	424.784	381.543	298.027	281.194	270.37	274.364
WIPF3	ENSG00000122574	644150	WAS/WASL interacting protein family member 3 [Source:HGNC Symbol;Acc:HGNC:22004]	protein_coding	72.3278	-1.04192	0.477102	-0.0858125	0.167323	-2.18386	0.0289727	0.26921	92.1802	113.47	100.548	43.6137	30.9978	80.6009	44.8844
AFAP1	ENSG00000196526	60312	actin filament associated protein 1 [Source:HGNC Symbol;Acc:HGNC:24017]	protein_coding	337.483	-0.559458	0.256187	-0.202839	0.281912	-2.18378	0.0289782	0.26921	373.842	442.241	421.493	191.415	337.655	334.647	261.088
ITM2B	ENSG00000136156	9445	integral membrane protein 2B [Source:HGNC Symbol;Acc:HGNC:6174]	protein_coding	1921.93	0.282186	0.129276	0.19365	0.131995	2.18282	0.0290488	0.269303	1809.46	1526.02	1803.58	1985.63	2260.63	2026.25	2041.93
PHB2	ENSG00000215021	11331	prohibitin 2 [Source:HGNC Symbol;Acc:HGNC:30306]	protein_coding	4397.44	0.247514	0.113383	0.176758	0.113316	2.183	0.0290356	0.269303	4124.21	3629.58	4179.47	4481.3	4544.5	5199.27	4623.73
COL9A3	ENSG00000092758	1299	collagen type IX alpha 3 chain [Source:HGNC Symbol;Acc:HGNC:2219]	protein_coding	64.1049	-1.12024	0.513107	-0.077976	0.160486	-2.18325	0.0290171	0.269303	107.544	78.556	91.1215	20.5953	48.7108	64.2767	37.9305
IFT22	ENSG00000128581	64792	intraflagellar transport 22 [Source:HGNC Symbol;Acc:HGNC:21895]	protein_coding	379.383	0.648822	0.297418	0.158426	0.254511	2.18152	0.0291451	0.269857	428.467	154.202	279.649	503.98	425.113	377.498	486.775
CFAP70	ENSG00000156042	118491	cilia and flagella associated protein 70 [Source:HGNC Symbol;Acc:HGNC:30726]	protein_coding	56.4925	1.09455	0.501875	0.0739881	0.157246	2.18092	0.0291896	0.269857	35.8478	27.6401	40.3987	59.363	94.1005	62.2361	75.861
ARGLU1	ENSG00000134884	55082	arginine and glutamate rich 1 [Source:HGNC Symbol;Acc:HGNC:25482]	protein_coding	1090.15	-0.338921	0.155366	-0.207396	0.161413	-2.18143	0.0291517	0.269857	1153.96	1312.18	1243.38	1161.82	894.508	918.238	946.998
PKD2	ENSG00000118762	5311	polycystin 2, transient receptor potential cation channel [Source:HGNC Symbol;Acc:HGNC:9009]	protein_coding	322.495	-0.484871	0.222301	-0.220222	0.250214	-2.18115	0.0291724	0.269857	380.67	394.235	379.748	259.259	323.263	250.985	269.307
MZF1	ENSG00000099326	7593	myeloid zinc finger 1 [Source:HGNC Symbol;Acc:HGNC:13108]	protein_coding	188.093	-0.766884	0.35186	-0.129216	0.216142	-2.17951	0.0292936	0.270341	245.814	238.577	250.921	241.087	94.1005	115.29	130.86
OGA	ENSG00000198408	10724	O-GlcNAcase [Source:HGNC Symbol;Acc:HGNC:7056]	protein_coding	1649.95	-0.305301	0.140079	-0.19663	0.142589	-2.1795	0.0292949	0.270341	1568.77	2094.83	1884.38	1501.04	1569.82	1492.65	1438.2
SMG7	ENSG00000116698	9887	SMG7 nonsense mediated mRNA decay factor [Source:HGNC Symbol;Acc:HGNC:16792]	protein_coding	1148.81	-0.306411	0.140595	-0.198672	0.143521	-2.17939	0.0293028	0.270341	1182.98	1383.46	1299.04	1052.79	1000.79	1108.01	1014.64
KATNA1	ENSG00000186625	11104	katanin catalytic subunit A1 [Source:HGNC Symbol;Acc:HGNC:6216]	protein_coding	539.563	0.517943	0.237848	0.206979	0.268963	2.17762	0.0294341	0.271036	547.96	328.771	425.533	440.983	628.813	741.732	663.152
CDH23	ENSG00000107736	64072	cadherin related 23 [Source:HGNC Symbol;Acc:HGNC:13733]	protein_coding	123.592	0.73865	0.339211	0.126909	0.212508	2.17755	0.0294392	0.271036	90.4731	80.0107	98.7524	125.995	163.846	158.141	147.929
GANAB	ENSG00000089597	23193	glucosidase II alpha subunit [Source:HGNC Symbol;Acc:HGNC:4138]	protein_coding	4531.89	-0.328282	0.150745	-0.20344	0.155752	-2.17773	0.0294261	0.271036	4172.01	5853.88	5338.91	3470.92	4985.11	4092.28	3810.12
SFPQ	ENSG00000116560	6421	splicing factor proline and glutamine rich [Source:HGNC Symbol;Acc:HGNC:10774]	protein_coding	4548.31	-0.217238	0.0998407	-0.162611	0.0978226	-2.17585	0.0295667	0.272022	4940.17	4919.93	4961.41	4229.31	4467.01	4142.27	4178.05
WHAMM	ENSG00000156232	123720	WASP homolog associated with actin, golgi membranes and microtubules [Source:HGNC Symbol;Acc:HGNC:30493]	protein_coding	227.149	-0.55969	0.257313	-0.203729	0.283751	-2.17513	0.0296204	0.272328	288.49	273.491	272.018	165.974	182.666	223.438	183.963
ID4	ENSG00000172201	3400	inhibitor of DNA binding 4, HLH protein [Source:HGNC Symbol;Acc:HGNC:5363]	protein_coding	1422.93	0.367086	0.168844	0.211231	0.180132	2.17412	0.0296962	0.272376	1519.27	920.851	1229.02	1562.82	1500.07	1606.92	1621.53
NAAA	ENSG00000138744	27163	N-acylethanolamine acid amidase [Source:HGNC Symbol;Acc:HGNC:736]	protein_coding	327.884	0.485495	0.223379	0.209804	0.251365	2.17342	0.0297487	0.272376	290.197	225.485	286.831	391.311	346.511	385.66	369.19
MRM3	ENSG00000171861	55178	mitochondrial rRNA methyltransferase 3 [Source:HGNC Symbol;Acc:HGNC:18485]	protein_coding	504.241	0.517509	0.238058	0.202733	0.265032	2.17388	0.0297142	0.272376	524.061	293.858	399.049	459.155	549.104	693.78	610.681
RBM3	ENSG00000102317	5935	RNA binding motif protein 3 [Source:HGNC Symbol;Acc:HGNC:9900]	protein_coding	1789.56	0.326351	0.150244	0.199488	0.155499	2.17214	0.0298455	0.272376	1701.92	1418.37	1574.2	1784.53	2344.76	1699.76	2003.36
C2orf92	ENSG00000228486	728537	chromosome 2 open reading frame 92 [Source:HGNC Symbol;Acc:HGNC:49272]	protein_coding	42.3685	-4.85757	2.23585	-0.00550329	0.129187	-2.17258	0.0298117	0.272376	104.129	53.8254	0	1.21149	1.10706	1.02026	135.285
EDNRB	ENSG00000136160	1910	endothelin receptor type B [Source:HGNC Symbol;Acc:HGNC:3180]	protein_coding	14.892	-2.82658	1.29983	-0.0246208	0.132145	-2.17458	0.0296619	0.272376	40.969	20.3664	24.6881	0	0	16.3242	1.89653
ITPKA	ENSG00000137825	3706	inositol-trisphosphate 3-kinase A [Source:HGNC Symbol;Acc:HGNC:6178]	protein_coding	76.441	-0.982097	0.452148	-0.0914041	0.172426	-2.17207	0.0298506	0.272376	141.684	74.1918	103.241	43.6137	48.7108	72.4388	51.2062
ERBB3	ENSG00000065361	2065	erb-b2 receptor tyrosine kinase 3 [Source:HGNC Symbol;Acc:HGNC:3431]	protein_coding	136.31	-0.686592	0.315935	-0.153662	0.248678	-2.17321	0.0297649	0.272376	155.341	197.845	167.879	111.457	106.278	109.168	106.205
CASP2	ENSG00000106144	835	caspase 2 [Source:HGNC Symbol;Acc:HGNC:1503]	protein_coding	1085.81	-0.328985	0.151295	-0.204396	0.156202	-2.17447	0.02967	0.272376	1217.12	1229.26	1237.1	902.56	1151.35	913.137	950.159
TECPR1	ENSG00000205356	25851	tectonin beta-propeller repeat containing 1 [Source:HGNC Symbol;Acc:HGNC:22214]	protein_coding	240.078	-0.538389	0.247751	-0.207332	0.27503	-2.17311	0.0297724	0.272376	257.763	330.226	286.831	201.107	207.021	200.992	196.606
RGPD8	ENSG00000169629	727851	RANBP2 like and GRIP domain containing 8 [Source:HGNC Symbol;Acc:HGNC:9849]	protein_coding	785.883	-0.377099	0.173598	-0.214142	0.184269	-2.17225	0.029837	0.272376	804.016	995.043	910.766	816.545	608.885	695.82	670.106
SQSTM1	ENSG00000161011	8878	sequestosome 1 [Source:HGNC Symbol;Acc:HGNC:11280]	protein_coding	1815.27	0.282504	0.130139	0.19052	0.132742	2.17079	0.0299469	0.273069	1681.43	1430.01	1742.08	1921.42	1956.18	2087.46	1888.31
TACC3	ENSG00000013810	10460	transforming acidic coiled-coil containing protein 3 [Source:HGNC Symbol;Acc:HGNC:11524]	protein_coding	1735.86	-0.337082	0.155312	-0.205694	0.16117	-2.17035	0.0299803	0.273186	1928.96	1950.81	2025.32	1242.99	1630.71	1893.61	1478.66
WDR61	ENSG00000140395	80349	WD repeat domain 61 [Source:HGNC Symbol;Acc:HGNC:30300]	protein_coding	742.416	0.398179	0.183589	0.215079	0.200199	2.16886	0.0300932	0.27384	698.179	535.345	654.01	944.963	856.868	682.557	824.989
NCOA3	ENSG00000124151	8202	nuclear receptor coactivator 3 [Source:HGNC Symbol;Acc:HGNC:7670]	protein_coding	450.099	-0.419339	0.193323	-0.218785	0.210203	-2.16911	0.0300747	0.27384	486.506	567.349	521.592	357.39	421.792	414.227	381.834
SMIM15	ENSG00000188725	643155	small integral membrane protein 15 [Source:HGNC Symbol;Acc:HGNC:33861]	protein_coding	782.037	0.358051	0.165175	0.208729	0.175567	2.1677	0.0301815	0.274269	650.382	650.269	722.239	942.54	917.756	750.915	840.161
RGPD6	ENSG00000183054	729540	RANBP2 like and GRIP domain containing 6 [Source:HGNC Symbol;Acc:HGNC:32419]	protein_coding	887.833	-0.365334	0.168525	-0.211379	0.177476	-2.16783	0.030172	0.274269	887.661	1134.7	1026.58	929.213	731.77	743.773	761.139
LRPAP1	ENSG00000163956	4043	LDL receptor related protein associated protein 1 [Source:HGNC Symbol;Acc:HGNC:6701]	protein_coding	1653.12	0.343224	0.15837	0.209012	0.166793	2.16723	0.0302173	0.274295	1481.71	1412.55	1411.71	1360.5	1970.57	2026.25	1908.54
FAM120AOS	ENSG00000188938	158293	family with sequence similarity 120A opposite strand [Source:HGNC Symbol;Acc:HGNC:23389]	protein_coding	815.03	-0.337176	0.155587	-0.206036	0.161305	-2.16712	0.0302255	0.274295	954.235	897.575	921.539	736.586	671.988	807.029	716.255
SRA1	ENSG00000213523	10011	steroid receptor RNA activator 1 [Source:HGNC Symbol;Acc:HGNC:11281]	protein_coding	709.719	0.382803	0.176674	0.212747	0.192262	2.16672	0.0302565	0.274389	590.636	529.526	697.102	820.179	862.403	751.935	716.255
NUSAP1	ENSG00000137804	51203	nucleolar and spindle associated protein 1 [Source:HGNC Symbol;Acc:HGNC:18538]	protein_coding	13.4688	2.76797	1.27766	0.0226455	0.131676	2.16643	0.0302783	0.274399	5.12112	2.90948	1.7955	2.42298	52.032	4.08106	25.9192
FRMD4A	ENSG00000151474	55691	FERM domain containing 4A [Source:HGNC Symbol;Acc:HGNC:25491]	protein_coding	113.834	-0.753538	0.34792	-0.133252	0.221876	-2.16584	0.0303236	0.274624	155.341	148.384	140.498	93.2848	71.9592	102.026	85.3437
POLR2C	ENSG00000102978	5432	RNA polymerase II subunit C [Source:HGNC Symbol;Acc:HGNC:9189]	protein_coding	1651.94	0.293163	0.135445	0.192128	0.138206	2.16445	0.0304297	0.275397	1608.03	1264.17	1524.38	1811.18	1860.98	1714.04	1780.84
EBPL	ENSG00000123179	84650	EBP like [Source:HGNC Symbol;Acc:HGNC:18061]	protein_coding	1011.75	0.358783	0.165804	0.208476	0.175847	2.1639	0.0304721	0.275594	1019.1	704.094	894.607	1113.36	1186.77	1039.65	1124.64
MRPS33	ENSG00000090263	51650	mitochondrial ribosomal protein S33 [Source:HGNC Symbol;Acc:HGNC:16634]	protein_coding	870.369	0.515743	0.238415	0.202532	0.265177	2.16321	0.0305247	0.275789	689.644	739.008	669.721	1343.54	1021.82	556.044	1072.8
DNM3	ENSG00000197959	26052	dynamin 3 [Source:HGNC Symbol;Acc:HGNC:29125]	protein_coding	51.9955	-1.13987	0.526966	-0.0750508	0.158018	-2.16308	0.0305352	0.275789	97.3013	56.7349	72.2688	48.4596	28.7837	27.5471	32.8731
OSMR	ENSG00000145623	9180	oncostatin M receptor [Source:HGNC Symbol;Acc:HGNC:8507]	protein_coding	19.866	2.38195	1.10151	0.0267608	0.132701	2.16245	0.0305835	0.276039	15.3634	0	3.14212	7.26894	56.4603	21.4256	35.4018
EXOSC8	ENSG00000120699	11340	exosome component 8 [Source:HGNC Symbol;Acc:HGNC:17035]	protein_coding	791.022	0.391608	0.181187	0.212467	0.195816	2.16134	0.0306689	0.276622	604.292	725.916	686.329	1062.48	728.448	829.475	900.218
TM9SF4	ENSG00000101337	9777	transmembrane 9 superfamily member 4 [Source:HGNC Symbol;Acc:HGNC:30797]	protein_coding	859.906	-0.371808	0.172067	-0.209874	0.181193	-2.16083	0.0307082	0.27679	957.65	1005.23	997.848	845.62	612.207	866.205	734.588
HERC6	ENSG00000138642	55008	HECT and RLD domain containing E3 ubiquitin protein ligase family member 6 [Source:HGNC Symbol;Acc:HGNC:26072]	protein_coding	70.9287	-1.05702	0.489464	-0.0817471	0.163452	-2.15954	0.0308081	0.277469	114.372	91.6487	95.1614	54.5171	24.3554	73.459	42.9879
PXN	ENSG00000089159	5829	paxillin [Source:HGNC Symbol;Acc:HGNC:9718]	protein_coding	483.637	-0.442653	0.204996	-0.218333	0.224456	-2.15932	0.0308252	0.277469	503.577	667.726	536.854	351.332	429.541	470.342	426.086
POLR3K	ENSG00000161980	51728	RNA polymerase III subunit K [Source:HGNC Symbol;Acc:HGNC:14121]	protein_coding	1172.92	0.391256	0.181324	0.209704	0.195093	2.15777	0.0309456	0.278176	1256.38	736.099	999.195	1406.54	1272.02	1201.87	1338.31
TRMT1L	ENSG00000121486	81627	tRNA methyltransferase 1 like [Source:HGNC Symbol;Acc:HGNC:16782]	protein_coding	327.392	0.488588	0.226417	0.205814	0.251947	2.15791	0.0309349	0.278176	264.591	254.58	280.547	323.468	439.505	356.072	372.983
NENF	ENSG00000117691	29937	neudesin neurotrophic factor [Source:HGNC Symbol;Acc:HGNC:30384]	protein_coding	846.201	0.351587	0.163039	0.205906	0.171741	2.15645	0.0310483	0.278911	739.148	704.094	753.211	931.636	794.872	1055.97	944.47
UCHL1	ENSG00000154277	7345	ubiquitin C-terminal hydrolase L1 [Source:HGNC Symbol;Acc:HGNC:12513]	protein_coding	3148.1	0.275785	0.127981	0.187652	0.129674	2.15489	0.0311705	0.279109	3004.39	2477.42	2958.08	3856.17	3101.99	3307.7	3330.93
ANKRD1	ENSG00000148677	27063	ankyrin repeat domain 1 [Source:HGNC Symbol;Acc:HGNC:15819]	protein_coding	25.2794	1.80772	0.838812	0.0387413	0.136689	2.1551	0.0311543	0.279109	17.0704	4.36422	10.3241	24.2298	15.4989	61.2159	44.2523
RPGR	ENSG00000156313	6103	retinitis pigmentosa GTPase regulator [Source:HGNC Symbol;Acc:HGNC:10295]	protein_coding	192.232	-0.712411	0.330606	-0.137217	0.224299	-2.15487	0.0311724	0.279109	146.805	338.955	253.165	138.11	174.916	157.121	136.55
MFSD8	ENSG00000164073	256471	major facilitator superfamily domain containing 8 [Source:HGNC Symbol;Acc:HGNC:28486]	protein_coding	215.686	-0.576101	0.267353	-0.187291	0.272535	-2.15483	0.031175	0.279109	295.318	242.942	257.654	184.147	205.914	149.979	173.848
LIG1	ENSG00000105486	3978	DNA ligase 1 [Source:HGNC Symbol;Acc:HGNC:6598]	protein_coding	672.989	-0.387017	0.179602	-0.21257	0.190986	-2.15486	0.0311726	0.279109	672.574	874.299	781.491	559.709	686.38	566.247	570.222
APOC1	ENSG00000130208	341	apolipoprotein C1 [Source:HGNC Symbol;Acc:HGNC:607]	protein_coding	259.603	0.615492	0.285841	0.163687	0.256552	2.15327	0.0312975	0.280017	247.521	146.929	204.238	374.351	306.657	226.499	311.03
SPCS1	ENSG00000114902	28972	signal peptidase complex subunit 1 [Source:HGNC Symbol;Acc:HGNC:23401]	protein_coding	2596.9	0.300321	0.139564	0.194353	0.143576	2.15185	0.0314095	0.280239	2536.66	1854.79	2500.23	3080.82	2761.02	2770.02	2674.73
TBC1D3L	ENSG00000274512	729873	TBC1 domain family member 3L [Source:HGNC Symbol;Acc:HGNC:51246]	protein_coding	132.165	-0.848765	0.394478	-0.106705	0.187759	-2.15162	0.0314275	0.280239	165.583	181.843	182.243	62.9975	166.06	78.5604	87.8724
SOGA1	ENSG00000149639	140710	suppressor of glucose, autophagy associated 1 [Source:HGNC Symbol;Acc:HGNC:16111]	protein_coding	279.526	-0.645671	0.299972	-0.157671	0.248485	-2.15244	0.0313629	0.280239	213.38	475.7	362.691	186.57	255.732	262.208	200.4
PPP1R9B	ENSG00000108819	84687	protein phosphatase 1 regulatory subunit 9B [Source:HGNC Symbol;Acc:HGNC:9298]	protein_coding	1176.88	-0.339891	0.157935	-0.203626	0.163526	-2.15209	0.0313899	0.280239	1162.49	1476.56	1367.72	953.443	1035.11	1234.52	1008.32
ANKFY1	ENSG00000185722	51479	ankyrin repeat and FYVE domain containing 1 [Source:HGNC Symbol;Acc:HGNC:20763]	protein_coding	799.094	-0.394867	0.183495	-0.212439	0.195798	-2.15193	0.0314031	0.280239	716.957	1114.33	939.494	679.646	750.59	729.489	663.152
NR3C2	ENSG00000151623	4306	nuclear receptor subfamily 3 group C member 2 [Source:HGNC Symbol;Acc:HGNC:7979]	protein_coding	79.6785	0.955043	0.444113	0.0852835	0.166397	2.15045	0.0315197	0.280873	49.5042	50.9159	56.1093	60.5745	127.312	107.128	106.205
MT-ND6	ENSG00000198695	4541	mitochondrially encoded NADH:ubiquinone oxidoreductase core subunit 6 [Source:HGNC Symbol;Acc:HGNC:7462]	protein_coding	1408.64	-0.399693	0.185897	-0.216803	0.200657	-2.15007	0.0315493	0.280949	1611.45	1590.03	1694.95	1041.88	1733.66	1033.53	1154.98
CKAP2	ENSG00000136108	26586	cytoskeleton associated protein 2 [Source:HGNC Symbol;Acc:HGNC:1990]	protein_coding	1925.41	0.386748	0.180201	0.211391	0.193884	2.1462	0.0318568	0.281313	1280.28	2046.82	1590.36	2596.22	1756.91	1923.2	2284.05
GLA	ENSG00000102393	2717	galactosidase alpha [Source:HGNC Symbol;Acc:HGNC:4296]	protein_coding	2145.79	0.267855	0.124774	0.182918	0.125723	2.14673	0.0318148	0.281313	2009.19	1720.96	2042.83	2187.95	2437.76	2370.07	2251.81
CXCR4	ENSG00000121966	7852	C-X-C motif chemokine receptor 4 [Source:HGNC Symbol;Acc:HGNC:2561]	protein_coding	166.092	0.643019	0.299445	0.148717	0.237017	2.14737	0.0317637	0.281313	133.149	109.106	136.009	201.107	167.167	221.397	194.71
RBFOX3	ENSG00000167281	146713	RNA binding fox-1 homolog 3 [Source:HGNC Symbol;Acc:HGNC:27097]	protein_coding	12.4455	3.13549	1.46061	0.0175876	0.13056	2.14671	0.0318165	0.281313	1.70704	4.36422	0	6.05745	2.21413	23.4661	49.3097
VWA5B2	ENSG00000145198	90113	von Willebrand factor A domain containing 5B2 [Source:HGNC Symbol;Acc:HGNC:25144]	protein_coding	12.6773	-3.75219	1.74735	-0.00879248	0.12941	-2.14736	0.0317644	0.281313	1.70704	53.8254	0	1.21149	0	1.02026	30.9766
HSCB	ENSG00000100209	150274	HscB mitochondrial iron-sulfur cluster cochaperone [Source:HGNC Symbol;Acc:HGNC:28913]	protein_coding	174.535	-0.650906	0.302975	-0.158595	0.251337	-2.14838	0.0316835	0.281313	233.864	209.483	216.358	157.494	102.957	166.303	135.285
PBX1	ENSG00000185630	5087	PBX homeobox 1 [Source:HGNC Symbol;Acc:HGNC:8632]	protein_coding	467.114	-0.505977	0.23572	-0.203212	0.255742	-2.14652	0.0318317	0.281313	484.799	615.355	583.088	306.507	367.545	545.842	366.662
WDR20	ENSG00000140153	91833	WD repeat domain 20 [Source:HGNC Symbol;Acc:HGNC:19667]	protein_coding	390.362	-0.501058	0.233407	-0.204655	0.253843	-2.14672	0.0318158	0.281313	445.537	480.064	479.398	254.413	326.584	433.612	312.927
ODF2	ENSG00000136811	4957	outer dense fiber of sperm tails 2 [Source:HGNC Symbol;Acc:HGNC:8114]	protein_coding	825.021	-0.387176	0.18031	-0.207238	0.190253	-2.14728	0.0317712	0.281313	785.238	1095.42	973.609	628.764	812.585	791.725	687.807
ZNF260	ENSG00000254004	339324	zinc finger protein 260 [Source:HGNC Symbol;Acc:HGNC:13499]	protein_coding	274.548	-0.496866	0.231489	-0.207969	0.253586	-2.14639	0.031842	0.281313	336.287	330.226	320.496	253.201	241.34	210.174	230.112
IQGAP3	ENSG00000183856	128239	IQ motif containing GTPase activating protein 3 [Source:HGNC Symbol;Acc:HGNC:20669]	protein_coding	1283.94	-0.375312	0.174872	-0.209418	0.184628	-2.14621	0.0318565	0.281313	1118.11	1780.6	1524.83	1156.97	1294.16	1045.77	1067.11
RAP1GAP2	ENSG00000132359	23108	RAP1 GTPase activating protein 2 [Source:HGNC Symbol;Acc:HGNC:29176]	protein_coding	517.753	-0.40129	0.186985	-0.211016	0.199266	-2.1461	0.0318647	0.281313	641.847	562.985	597.003	403.426	513.678	462.18	443.155
USP37	ENSG00000135913	57695	ubiquitin specific peptidase 37 [Source:HGNC Symbol;Acc:HGNC:20063]	protein_coding	763.047	-0.398026	0.185325	-0.211453	0.197515	-2.14771	0.0317365	0.281313	851.813	907.758	891.016	829.871	685.273	529.517	646.083
MRPL21	ENSG00000197345	219927	mitochondrial ribosomal protein L21 [Source:HGNC Symbol;Acc:HGNC:14479]	protein_coding	1197.69	0.436838	0.203608	0.210011	0.223772	2.14548	0.0319142	0.281376	1287.11	727.37	978.995	1667.01	1198.95	1112.09	1412.28
PTCD3	ENSG00000132300	55037	pentatricopeptide repeat domain 3 [Source:HGNC Symbol;Acc:HGNC:24717]	protein_coding	1192.57	-0.287681	0.13412	-0.189146	0.134995	-2.14496	0.0319563	0.281376	1312.71	1339.82	1334.5	1028.56	1131.42	1134.53	1066.48
TAOK2	ENSG00000149930	9344	TAO kinase 2 [Source:HGNC Symbol;Acc:HGNC:16835]	protein_coding	1176.3	-0.303957	0.141681	-0.199042	0.144796	-2.14536	0.0319242	0.281376	1329.78	1301.99	1323.28	984.942	1049.5	1205.95	1038.66
GEN1	ENSG00000178295	348654	GEN1 Holliday junction 5' flap endonuclease [Source:HGNC Symbol;Acc:HGNC:26881]	protein_coding	581.856	-0.468925	0.218597	-0.210198	0.238824	-2.14516	0.0319402	0.281376	705.008	667.726	697.102	694.184	443.933	392.802	472.235
TPCN1	ENSG00000186815	53373	two pore segment channel 1 [Source:HGNC Symbol;Acc:HGNC:18182]	protein_coding	364.577	-0.509646	0.237707	-0.20618	0.260923	-2.144	0.0320326	0.281862	375.549	494.612	444.835	243.51	387.473	315.262	290.801
H1-4	ENSG00000168298	3008	H1.4 linker histone, cluster member [Source:HGNC Symbol;Acc:HGNC:4718]	protein_coding	25.9379	1.61976	0.756696	0.0438692	0.138794	2.14057	0.0323085	0.283353	11.9493	10.1832	13.9151	44.8251	16.606	44.8916	39.1949
RPL3L	ENSG00000140986	6123	ribosomal protein L3 like [Source:HGNC Symbol;Acc:HGNC:10351]	protein_coding	13.1397	-2.54103	1.18672	-0.0246635	0.131998	-2.14123	0.0322557	0.283353	3.41408	42.1875	24.2392	8.48043	9.96358	3.06079	0.632175
CCDC173	ENSG00000154479	129881	coiled-coil domain containing 173 [Source:HGNC Symbol;Acc:HGNC:25064]	protein_coding	54.9075	-1.13582	0.530547	-0.0738299	0.156984	-2.14084	0.0322867	0.283353	87.059	72.737	79.0019	20.5953	34.319	57.1348	33.5053
LRRC37A	ENSG00000176681	9884	leucine rich repeat containing 37A [Source:HGNC Symbol;Acc:HGNC:29069]	protein_coding	295.754	-0.581447	0.271532	-0.179334	0.264809	-2.14136	0.0322453	0.283353	271.419	450.97	368.526	307.719	253.518	191.81	226.319
WASL	ENSG00000106299	8976	WASP like actin nucleation promoting factor [Source:HGNC Symbol;Acc:HGNC:12735]	protein_coding	411.959	-0.42545	0.198741	-0.212471	0.214267	-2.14072	0.0322964	0.283353	474.557	496.067	474.46	405.849	353.154	327.505	352.122
GTF2A2	ENSG00000140307	2958	general transcription factor IIA subunit 2 [Source:HGNC Symbol;Acc:HGNC:4647]	protein_coding	671.32	0.416318	0.194665	0.204553	0.21179	2.13864	0.0324647	0.283779	602.585	439.332	652.215	863.793	743.947	720.307	677.06
CBX3	ENSG00000122565	11335	chromobox 3 [Source:HGNC Symbol;Acc:HGNC:1553]	protein_coding	3740.04	0.322414	0.150703	0.196936	0.156048	2.13939	0.0324038	0.283779	3641.12	2714.55	3472.04	5032.53	3891.33	3466.86	3961.84
CCT7	ENSG00000135624	10574	chaperonin containing TCP1 subunit 7 [Source:HGNC Symbol;Acc:HGNC:1622]	protein_coding	8128.15	0.246077	0.115096	0.173899	0.115144	2.13802	0.0325148	0.283779	7159.33	6799.46	8123.28	8061.26	9754.35	8880.38	8119.03
SUSD4	ENSG00000143502	55061	sushi domain containing 4 [Source:HGNC Symbol;Acc:HGNC:25470]	protein_coding	78.1873	-0.931304	0.435517	-0.0932149	0.173543	-2.13838	0.0324856	0.283779	112.665	104.741	104.139	37.5562	57.5674	77.5401	53.1027
CEP44	ENSG00000164118	80817	centrosomal protein 44 [Source:HGNC Symbol;Acc:HGNC:29356]	protein_coding	250.338	-0.59283	0.277147	-0.17492	0.262395	-2.13904	0.0324322	0.283779	288.49	330.226	308.826	276.22	149.454	205.073	194.078
MAPK8IP2	ENSG00000008735	23542	mitogen-activated protein kinase 8 interacting protein 2 [Source:HGNC Symbol;Acc:HGNC:6883]	protein_coding	382.554	-0.582309	0.272157	-0.177338	0.262476	-2.1396	0.0323869	0.283779	590.636	336.045	487.029	219.28	402.971	353.012	288.904
OXSM	ENSG00000151093	54995	3-oxoacyl-ACP synthase, mitochondrial [Source:HGNC Symbol;Acc:HGNC:26063]	protein_coding	259.86	-0.517594	0.242008	-0.200919	0.260534	-2.13875	0.0324561	0.283779	286.783	344.773	308.826	249.567	207.021	207.114	214.94
SART1	ENSG00000175467	9092	spliceosome associated factor 1, recruiter of U4/U6.U5 tri-snRNP [Source:HGNC Symbol;Acc:HGNC:10538]	protein_coding	898.402	-0.411759	0.192603	-0.210338	0.206328	-2.13787	0.0325274	0.283779	846.692	1208.89	1077.75	771.719	658.703	996.798	728.266
OSBPL2	ENSG00000130703	9885	oxysterol binding protein like 2 [Source:HGNC Symbol;Acc:HGNC:15761]	protein_coding	525.467	-0.405008	0.189493	-0.210395	0.202077	-2.13732	0.0325716	0.283978	530.889	688.092	610.469	494.288	421.792	487.686	445.051
DOHH	ENSG00000129932	83475	deoxyhypusine hydroxylase [Source:HGNC Symbol;Acc:HGNC:28662]	protein_coding	236.795	0.538383	0.251928	0.184515	0.259793	2.13705	0.0325939	0.283987	192.896	170.205	202.891	255.624	259.053	305.059	271.835
MARVELD2	ENSG00000152939	153562	MARVEL domain containing 2 [Source:HGNC Symbol;Acc:HGNC:26401]	protein_coding	218.271	0.730333	0.341801	0.121347	0.204147	2.13672	0.0326209	0.284036	223.622	96.0129	158.004	352.544	193.736	221.397	282.582
MREG	ENSG00000118242	55686	melanoregulin [Source:HGNC Symbol;Acc:HGNC:25478]	protein_coding	139.619	1.035	0.484666	0.0749954	0.157818	2.13549	0.0327209	0.28406	66.5746	119.289	76.3087	270.162	184.88	48.9727	211.147
TMEM271	ENSG00000273238	112441426	transmembrane protein 271 [Source:HGNC Symbol;Acc:HGNC:53639]	protein_coding	8.37058	-3.2285	1.51174	-0.0178094	0.130562	-2.13562	0.0327107	0.28406	3.41408	23.2758	22.4437	1.21149	1.10706	7.14185	0
PUM1	ENSG00000134644	9698	pumilio RNA binding family member 1 [Source:HGNC Symbol;Acc:HGNC:14957]	protein_coding	1543.13	-0.305576	0.143101	-0.193418	0.145198	-2.13538	0.0327302	0.28406	1503.9	1931.9	1751.96	1551.92	1303.01	1417.15	1342.11
GALT	ENSG00000213930	2592	galactose-1-phosphate uridylyltransferase [Source:HGNC Symbol;Acc:HGNC:4135]	protein_coding	249.746	-0.529121	0.247735	-0.19645	0.262633	-2.13584	0.0326928	0.28406	283.369	325.862	298.053	204.742	244.661	186.708	204.825
XPO5	ENSG00000124571	57510	exportin 5 [Source:HGNC Symbol;Acc:HGNC:17675]	protein_coding	873.5	-0.366031	0.171397	-0.20399	0.178528	-2.13558	0.032714	0.28406	947.407	1044.5	1009.07	829.871	903.365	630.523	749.76
CHST3	ENSG00000122863	9469	carbohydrate sulfotransferase 3 [Source:HGNC Symbol;Acc:HGNC:1971]	protein_coding	257.321	-0.794495	0.37244	-0.111536	0.192119	-2.13321	0.0329072	0.285064	445.537	202.209	366.282	100.554	210.342	313.221	163.101
C1QTNF6	ENSG00000133466	114904	C1q and TNF related 6 [Source:HGNC Symbol;Acc:HGNC:14343]	protein_coding	201.323	-0.705438	0.330698	-0.134686	0.219927	-2.13318	0.0329101	0.285064	158.755	350.592	262.143	191.415	126.205	178.546	141.607
GOLGA8O	ENSG00000206127	728047	golgin A8 family member O [Source:HGNC Symbol;Acc:HGNC:44406]	protein_coding	174.324	-0.605642	0.283905	-0.169387	0.258009	-2.13326	0.0329037	0.285064	223.622	215.302	210.971	151.436	122.884	155.08	140.975
NDUFS1	ENSG00000023228	4719	NADH:ubiquinone oxidoreductase core subunit S1 [Source:HGNC Symbol;Acc:HGNC:7707]	protein_coding	1460.58	-0.365335	0.171335	-0.205655	0.179344	-2.13229	0.0329834	0.285513	1418.55	1866.43	1730.86	1112.15	1661.7	1216.16	1218.2
PYROXD1	ENSG00000121350	79912	pyridine nucleotide-disulphide oxidoreductase domain 1 [Source:HGNC Symbol;Acc:HGNC:26162]	protein_coding	155.577	0.726711	0.340879	0.121121	0.203367	2.13187	0.0330171	0.28562	85.352	136.746	118.054	205.953	220.306	128.553	194.078
FGF2	ENSG00000138685	2247	fibroblast growth factor 2 [Source:HGNC Symbol;Acc:HGNC:3676]	protein_coding	210.601	0.758967	0.356112	0.114436	0.196095	2.13126	0.033068	0.285691	160.462	149.838	144.089	209.588	132.848	389.741	287.64
CDK10	ENSG00000185324	8558	cyclin dependent kinase 10 [Source:HGNC Symbol;Acc:HGNC:1770]	protein_coding	335.231	-0.507628	0.238203	-0.198543	0.253758	-2.13107	0.0330835	0.285691	315.802	482.974	409.822	261.682	277.873	328.525	269.939
KLHL18	ENSG00000114648	23276	kelch like family member 18 [Source:HGNC Symbol;Acc:HGNC:29120]	protein_coding	555.091	-0.375084	0.176014	-0.20734	0.184765	-2.13099	0.0330897	0.285691	612.827	672.09	628.873	454.309	533.605	500.95	482.982
LAMTOR2	ENSG00000116586	28956	late endosomal/lysosomal adaptor, MAPK and MTOR activator 2 [Source:HGNC Symbol;Acc:HGNC:29796]	protein_coding	996.218	0.374194	0.175717	0.204753	0.186371	2.12953	0.0332103	0.286176	1032.76	663.362	864.981	1142.44	994.144	1146.78	1129.06
SEZ6L2	ENSG00000174938	26470	seizure related 6 homolog like 2 [Source:HGNC Symbol;Acc:HGNC:30844]	protein_coding	605.202	0.470379	0.220872	0.201579	0.240654	2.12964	0.0332011	0.286176	592.343	407.327	491.966	512.46	862.403	644.807	725.105
SLIT1	ENSG00000187122	6585	slit guidance ligand 1 [Source:HGNC Symbol;Acc:HGNC:11085]	protein_coding	76.9002	-1.1139	0.522955	-0.0728688	0.155973	-2.13001	0.0331705	0.286176	51.2112	167.295	111.77	31.4988	79.7086	55.0943	41.7236
HMG20B	ENSG00000064961	10362	high mobility group 20B [Source:HGNC Symbol;Acc:HGNC:5002]	protein_coding	1619.45	0.302586	0.142188	0.191577	0.145138	2.12807	0.033331	0.28703	1555.11	1268.53	1468.72	1870.54	1524.43	1879.33	1769.46
PSMB1	ENSG00000008018	5689	proteasome 20S subunit beta 1 [Source:HGNC Symbol;Acc:HGNC:9537]	protein_coding	3190.79	0.271467	0.127616	0.188023	0.1292	2.12723	0.0334011	0.287333	3011.22	2579.25	2978.73	3976.11	3156.24	3237.3	3396.68
CCNL1	ENSG00000163660	57018	cyclin L1 [Source:HGNC Symbol;Acc:HGNC:20569]	protein_coding	790.72	-0.457791	0.215215	-0.206088	0.232123	-2.12713	0.0334093	0.287333	699.886	1128.88	972.711	810.487	780.48	514.213	628.382
SLC16A11	ENSG00000174326	162515	solute carrier family 16 member 11 [Source:HGNC Symbol;Acc:HGNC:23093]	protein_coding	5.46276	4.47086	2.10219	0.0109233	0.12963	2.12677	0.0334395	0.287407	1.70704	0	0	0	12.1777	9.18238	15.1722
TAF9B	ENSG00000187325	51616	TATA-box binding protein associated factor 9b [Source:HGNC Symbol;Acc:HGNC:17306]	protein_coding	675.41	0.418684	0.196892	0.200177	0.209995	2.12647	0.0334642	0.287424	605.999	516.433	579.048	952.231	603.35	703.983	766.829
MED11	ENSG00000161920	400569	mediator complex subunit 11 [Source:HGNC Symbol;Acc:HGNC:32687]	protein_coding	367.7	0.483315	0.227311	0.196595	0.244936	2.12622	0.0334847	0.287424	319.217	266.218	314.661	513.672	353.154	389.741	417.236
CUL9	ENSG00000112659	23113	cullin 9 [Source:HGNC Symbol;Acc:HGNC:15982]	protein_coding	219.265	-0.593292	0.279206	-0.170598	0.25676	-2.12492	0.0335929	0.288024	215.087	325.862	272.018	178.089	157.203	215.276	171.319
CUL3	ENSG00000036257	8452	cullin 3 [Source:HGNC Symbol;Acc:HGNC:2553]	protein_coding	837.254	-0.335113	0.15771	-0.200268	0.161918	-2.12487	0.0335978	0.288024	865.469	1060.51	921.091	799.584	711.842	746.834	755.449
DPYS	ENSG00000147647	1807	dihydropyrimidinase [Source:HGNC Symbol;Acc:HGNC:3013]	protein_coding	5.61114	-5.37982	2.53298	-0.00797569	0.129385	-2.12391	0.0336776	0.288337	0	39.278	0	0	0	0	0
ADAD2	ENSG00000140955	161931	adenosine deaminase domain containing 2 [Source:HGNC Symbol;Acc:HGNC:30714]	protein_coding	5.61114	-5.37982	2.53298	-0.00797569	0.129385	-2.12391	0.0336776	0.288337	0	39.278	0	0	0	0	0
CHKA	ENSG00000110721	1119	choline kinase alpha [Source:HGNC Symbol;Acc:HGNC:1937]	protein_coding	332.616	-0.552247	0.260127	-0.184512	0.261679	-2.12299	0.0337549	0.288813	320.924	475.7	420.147	204.742	302.229	347.91	256.663
JSRP1	ENSG00000167476	126306	junctional sarcoplasmic reticulum protein 1 [Source:HGNC Symbol;Acc:HGNC:24963]	protein_coding	8.84889	3.56683	1.68079	0.0150975	0.130185	2.12212	0.0338277	0.28925	1.70704	2.90948	0	1.21149	33.2119	2.04053	20.8618
OTUB1	ENSG00000167770	55611	OTU deubiquitinase, ubiquitin aldehyde binding 1 [Source:HGNC Symbol;Acc:HGNC:23077]	protein_coding	970.825	0.340653	0.160548	0.199295	0.167053	2.12181	0.033854	0.28929	935.458	733.189	863.635	932.848	1152.45	1097.8	1080.39
DPCD	ENSG00000166171	25911	deleted in primary ciliary dyskinesia homolog (mouse) [Source:HGNC Symbol;Acc:HGNC:24542]	protein_coding	465.648	0.528563	0.24919	0.183581	0.255274	2.12112	0.0339115	0.28948	327.752	421.875	367.179	690.55	340.976	539.72	571.486
SP5	ENSG00000204335	389058	Sp5 transcription factor [Source:HGNC Symbol;Acc:HGNC:14529]	protein_coding	12.1713	-2.47027	1.16504	-0.0278828	0.13296	-2.12032	0.0339789	0.28948	35.8478	8.72844	23.3415	2.42298	1.10706	11.2229	2.5287
UBAP1L	ENSG00000246922	390595	ubiquitin associated protein 1 like [Source:HGNC Symbol;Acc:HGNC:40028]	protein_coding	32.7039	-1.81637	0.856513	-0.039364	0.136793	-2.12066	0.0339505	0.28948	95.5942	10.1832	57.4559	9.69192	7.74945	38.7701	9.48263
RGPD5	ENSG00000015568	84220	RANBP2 like and GRIP domain containing 5 [Source:HGNC Symbol;Acc:HGNC:32418]	protein_coding	901.791	-0.357335	0.168534	-0.203135	0.175089	-2.12025	0.0339849	0.28948	897.903	1149.24	1040.94	949.808	747.269	752.955	774.415
DLAT	ENSG00000150768	1737	dihydrolipoamide S-acetyltransferase [Source:HGNC Symbol;Acc:HGNC:2896]	protein_coding	964.06	-0.362412	0.170907	-0.203542	0.178062	-2.12053	0.0339617	0.28948	896.196	1280.17	1130.71	778.988	911.114	937.623	813.61
SLC25A38	ENSG00000144659	54977	solute carrier family 25 member 38 [Source:HGNC Symbol;Acc:HGNC:26054]	protein_coding	621.497	0.360875	0.170239	0.198411	0.178366	2.11982	0.0340211	0.289603	541.132	484.429	580.844	707.51	675.309	696.841	664.416
ZFAND2B	ENSG00000158552	130617	zinc finger AN1-type containing 2B [Source:HGNC Symbol;Acc:HGNC:25206]	protein_coding	257.188	0.551968	0.260735	0.172642	0.251214	2.11697	0.0342625	0.291472	237.279	160.021	214.113	294.392	254.625	337.708	302.18
TOMM22	ENSG00000100216	56993	translocase of outer mitochondrial membrane 22 [Source:HGNC Symbol;Acc:HGNC:18002]	protein_coding	2657.49	0.302989	0.143221	0.189471	0.146197	2.11553	0.0343848	0.292056	2668.1	1879.52	2495.74	2823.98	3214.92	2719	2801.17
UCKL1	ENSG00000198276	54963	uridine-cytidine kinase 1 like 1 [Source:HGNC Symbol;Acc:HGNC:15938]	protein_coding	251.545	0.584515	0.276349	0.161714	0.245856	2.11513	0.0344188	0.292056	211.673	177.478	200.198	221.703	259.053	381.579	309.134
SNAP91	ENSG00000065609	9892	synaptosome associated protein 91 [Source:HGNC Symbol;Acc:HGNC:14986]	protein_coding	67.0209	-0.929411	0.439372	-0.0916671	0.171882	-2.11532	0.0344029	0.292056	102.422	88.7392	84.3884	55.7286	47.6038	42.8511	47.4131
GMDS	ENSG00000112699	2762	GDP-mannose 4,6-dehydratase [Source:HGNC Symbol;Acc:HGNC:4369]	protein_coding	290.45	-0.469561	0.221955	-0.202702	0.237187	-2.11557	0.0343817	0.292056	348.236	350.592	335.758	245.933	245.768	262.208	244.652
NAPEPLD	ENSG00000161048	222236	N-acyl phosphatidylethanolamine phospholipase D [Source:HGNC Symbol;Acc:HGNC:21683]	protein_coding	79.1248	1.09328	0.516996	0.0685507	0.152872	2.11468	0.0344575	0.292198	46.0901	52.3707	46.2341	42.4022	170.488	80.6009	115.688
PLLP	ENSG00000102934	51090	plasmolipin [Source:HGNC Symbol;Acc:HGNC:18553]	protein_coding	137.964	0.698463	0.330514	0.12347	0.20479	2.11326	0.0345783	0.293035	95.5942	98.9224	111.321	207.165	141.704	147.938	163.101
MCM9	ENSG00000111877	254394	minichromosome maintenance 9 homologous recombination repair factor [Source:HGNC Symbol;Acc:HGNC:21484]	protein_coding	220.931	-0.627942	0.297279	-0.152988	0.238355	-2.1123	0.0346609	0.293549	187.774	357.866	281.893	162.34	211.449	179.567	165.63
ZC3H15	ENSG00000065548	55854	zinc finger CCCH-type containing 15 [Source:HGNC Symbol;Acc:HGNC:29528]	protein_coding	2357.66	0.349172	0.16534	0.199769	0.172565	2.11185	0.0346996	0.29369	2306.21	1784.97	2030.26	3317.06	2259.52	2138.47	2667.15
CFAP44	ENSG00000206530	55779	cilia and flagella associated protein 44 [Source:HGNC Symbol;Acc:HGNC:25631]	protein_coding	131.934	-0.716115	0.339136	-0.128946	0.212289	-2.11159	0.034722	0.293693	148.512	192.026	168.328	92.0733	133.955	88.763	99.8837
HES4	ENSG00000188290	57801	hes family bHLH transcription factor 4 [Source:HGNC Symbol;Acc:HGNC:24149]	protein_coding	1023.12	0.370859	0.175652	0.202251	0.185274	2.11133	0.0347441	0.293693	1060.07	693.911	880.243	1050.36	1047.28	1261.05	1168.89
RBCK1	ENSG00000125826	10616	RANBP2-type and C3HC4-type zinc finger containing 1 [Source:HGNC Symbol;Acc:HGNC:15864]	protein_coding	522.15	0.460599	0.218185	0.197882	0.234127	2.11104	0.0347685	0.293713	503.577	360.776	428.226	473.693	540.247	731.53	617.003
RAB9A	ENSG00000123595	9367	RAB9A, member RAS oncogene family [Source:HGNC Symbol;Acc:HGNC:9792]	protein_coding	536.674	0.383935	0.181937	0.200704	0.192756	2.11026	0.0348359	0.294096	474.557	404.418	494.211	634.821	577.888	591.753	579.073
STC2	ENSG00000113739	8614	stanniocalcin 2 [Source:HGNC Symbol;Acc:HGNC:11374]	protein_coding	1229	-0.296087	0.140348	-0.18856	0.141316	-2.10966	0.0348872	0.294343	1331.49	1399.46	1389.72	1017.65	1131.42	1247.78	1085.44
NMD3	ENSG00000169251	51068	NMD3 ribosome export adaptor [Source:HGNC Symbol;Acc:HGNC:24250]	protein_coding	1002.55	0.352831	0.167279	0.197385	0.174146	2.10923	0.0349248	0.294474	872.298	835.021	891.914	1307.2	1113.71	887.63	1110.1
BAHCC1	ENSG00000266074	57597	BAH domain and coiled-coil containing 1 [Source:HGNC Symbol;Acc:HGNC:29279]	protein_coding	194.578	-0.590281	0.280065	-0.166256	0.249989	-2.10766	0.0350604	0.295429	216.794	267.672	236.557	158.705	137.276	190.789	154.251
ONECUT2	ENSG00000119547	9480	one cut homeobox 2 [Source:HGNC Symbol;Acc:HGNC:8139]	protein_coding	709.051	-0.407093	0.1932	-0.204321	0.203851	-2.10711	0.0351084	0.295647	903.024	741.918	825.929	758.393	652.061	484.626	597.406
F8A2	ENSG00000288709	474383	coagulation factor VIII associated 2 [Source:HGNC Symbol;Acc:HGNC:31849]	protein_coding	222.351	0.541779	0.25739	0.171362	0.246552	2.1049	0.0353003	0.296754	184.36	152.748	193.465	256.836	262.374	255.066	251.606
TSNAXIP1	ENSG00000102904	55815	translin associated factor X interacting protein 1 [Source:HGNC Symbol;Acc:HGNC:18586]	protein_coding	18.5817	-2.15192	1.02237	-0.0327311	0.134439	-2.10482	0.0353067	0.296754	34.1408	34.9138	29.6257	18.1724	0	8.16212	5.0574
POLR2A	ENSG00000181222	5430	RNA polymerase II subunit A [Source:HGNC Symbol;Acc:HGNC:9187]	protein_coding	1952.42	-0.336753	0.159968	-0.194963	0.163575	-2.10513	0.0352801	0.296754	1879.45	2464.33	2293.75	1429.56	2098.99	1860.96	1639.86
ASPH	ENSG00000198363	444	aspartate beta-hydroxylase [Source:HGNC Symbol;Acc:HGNC:757]	protein_coding	1184.39	-0.311256	0.147899	-0.191173	0.149629	-2.10451	0.0353336	0.296793	1179.56	1464.92	1347.07	1107.3	1165.74	985.576	1040.56
MTMR9	ENSG00000104643	66036	myotubularin related protein 9 [Source:HGNC Symbol;Acc:HGNC:14596]	protein_coding	300.145	-0.501928	0.238532	-0.191779	0.246771	-2.10424	0.0353576	0.296807	401.154	327.317	351.918	310.142	222.52	240.782	247.181
SEC62	ENSG00000008952	7095	SEC62 homolog, preprotein translocation factor [Source:HGNC Symbol;Acc:HGNC:11846]	protein_coding	3548.97	0.300471	0.142841	0.187815	0.14512	2.10354	0.0354187	0.296946	3390.18	2788.74	3233.24	4722.39	3588	3279.13	3841.1
WDFY1	ENSG00000085449	57590	WD repeat and FYVE domain containing 1 [Source:HGNC Symbol;Acc:HGNC:20451]	protein_coding	470.537	-0.396519	0.188499	-0.204801	0.197836	-2.10356	0.0354171	0.296946	515.526	605.172	515.308	409.484	430.648	392.802	424.822
TECR	ENSG00000099797	9524	trans-2,3-enoyl-CoA reductase [Source:HGNC Symbol;Acc:HGNC:4551]	protein_coding	1497.56	0.319227	0.151814	0.192295	0.155312	2.10275	0.0354878	0.297106	1384.41	1253.99	1303.08	1354.45	1565.39	1924.22	1697.39
CENPM	ENSG00000100162	79019	centromere protein M [Source:HGNC Symbol;Acc:HGNC:18352]	protein_coding	758.157	0.421553	0.200486	0.191854	0.212536	2.10265	0.0354963	0.297106	641.847	504.795	763.536	978.884	953.183	731.53	733.323
NUFIP1	ENSG00000083635	26747	nuclear FMR1 interacting protein 1 [Source:HGNC Symbol;Acc:HGNC:8057]	protein_coding	257.493	-0.495922	0.235866	-0.193993	0.245975	-2.10256	0.0355047	0.297106	300.439	322.952	302.093	205.953	221.413	234.661	214.94
UPK3BL2	ENSG00000284981	107983993	uroplakin 3B like 2 [Source:HGNC Symbol;Acc:HGNC:53444]	protein_coding	11.2486	3.17813	1.51226	0.0165104	0.130374	2.10158	0.0355897	0.297631	1.70704	4.36422	0	24.2298	8.85652	1.02026	38.5627
NIT2	ENSG00000114021	56954	nitrilase family member 2 [Source:HGNC Symbol;Acc:HGNC:29878]	protein_coding	595.469	0.437631	0.208283	0.19419	0.219726	2.10114	0.0356288	0.297698	551.374	430.603	506.33	848.043	536.926	609.098	685.91
CIC	ENSG00000079432	23152	capicua transcriptional repressor [Source:HGNC Symbol;Acc:HGNC:14214]	protein_coding	297.803	-0.611077	0.290853	-0.154353	0.237531	-2.10098	0.0356425	0.297698	298.732	424.784	386.032	175.666	218.092	363.214	218.1
PRDX6	ENSG00000117592	9588	peroxiredoxin 6 [Source:HGNC Symbol;Acc:HGNC:16753]	protein_coding	4585.8	0.253257	0.120595	0.171802	0.120123	2.10005	0.0357242	0.298194	4358.07	3514.65	4545.75	4957.42	5018.32	5092.14	4614.25
PMPCA	ENSG00000165688	23203	peptidase, mitochondrial processing subunit alpha [Source:HGNC Symbol;Acc:HGNC:18667]	protein_coding	985.181	0.318427	0.151648	0.190353	0.154772	2.09978	0.0357483	0.298208	838.157	874.299	881.141	977.673	1015.18	1216.16	1093.66
SYAP1	ENSG00000169895	94056	synapse associated protein 1 [Source:HGNC Symbol;Acc:HGNC:16273]	protein_coding	1692.28	0.320813	0.152847	0.200383	0.158629	2.09891	0.0358247	0.298242	1628.52	1312.18	1509.12	2189.16	1556.53	1777.3	1873.14
TRAF2	ENSG00000127191	7186	TNF receptor associated factor 2 [Source:HGNC Symbol;Acc:HGNC:12032]	protein_coding	395.471	0.535938	0.255315	0.17429	0.248331	2.09912	0.0358059	0.298242	281.662	356.411	307.928	353.755	355.368	621.341	491.832
MOSMO	ENSG00000185716	730094	modulator of smoothened [Source:HGNC Symbol;Acc:HGNC:27087]	protein_coding	205.397	-0.708231	0.337441	-0.126287	0.20782	-2.09883	0.0358318	0.298242	295.318	224.03	269.774	163.551	243.554	94.8846	146.665
PGRMC2	ENSG00000164040	10424	progesterone receptor membrane component 2 [Source:HGNC Symbol;Acc:HGNC:16089]	protein_coding	964.849	-0.309811	0.147619	-0.189975	0.148992	-2.09872	0.0358419	0.298242	1048.12	1115.79	1086.73	885.6	804.836	960.069	852.804
THEM4	ENSG00000159445	117145	thioesterase superfamily member 4 [Source:HGNC Symbol;Acc:HGNC:17947]	protein_coding	239.224	-0.538953	0.256938	-0.180055	0.251577	-2.0976	0.0359402	0.298874	327.752	261.853	282.342	238.664	185.987	182.627	195.342
RPL14	ENSG00000188846	9045	ribosomal protein L14 [Source:HGNC Symbol;Acc:HGNC:10305]	protein_coding	16935.5	0.251565	0.119979	0.172245	0.119	2.09674	0.0360164	0.299134	16350	13815.7	15697.6	21425.2	16412.2	16716	18132
ZNF680	ENSG00000173041	340252	zinc finger protein 680 [Source:HGNC Symbol;Acc:HGNC:26897]	protein_coding	180.087	0.640031	0.305226	0.136559	0.218452	2.09691	0.0360016	0.299134	170.704	96.0129	144.538	201.107	209.235	223.438	215.572
MICOS13	ENSG00000174917	125988	mitochondrial contact site and cristae organizing system subunit 13 [Source:HGNC Symbol;Acc:HGNC:33702]	protein_coding	923.471	0.410711	0.195953	0.196014	0.208169	2.09597	0.0360852	0.299332	880.833	583.351	871.265	1275.7	1006.32	894.772	952.056
ASPM	ENSG00000066279	259266	assembly factor for spindle microtubules [Source:HGNC Symbol;Acc:HGNC:19048]	protein_coding	1646.17	-0.335717	0.160167	-0.195568	0.163691	-2.09605	0.036078	0.299332	1853.85	1850.43	1890.66	1912.94	1290.84	1309	1415.44
UBN1	ENSG00000118900	29855	ubinuclein 1 [Source:HGNC Symbol;Acc:HGNC:12506]	protein_coding	1029.83	-0.335167	0.159935	-0.195331	0.163408	-2.09564	0.0361141	0.299385	1135.18	1182.7	1182.34	775.354	966.467	1080.46	886.31
TRAP1	ENSG00000126602	10131	TNF receptor associated protein 1 [Source:HGNC Symbol;Acc:HGNC:16264]	protein_coding	4491.98	0.233783	0.111592	0.165928	0.109747	2.09498	0.0361724	0.299682	3799.87	4375.86	4081.17	4357.73	4807.98	5083.98	4937.29
TANC1	ENSG00000115183	85461	tetratricopeptide repeat, ankyrin repeat and coiled-coil containing 1 [Source:HGNC Symbol;Acc:HGNC:29364]	protein_coding	302.474	-0.50606	0.241616	-0.188343	0.246594	-2.09448	0.0362171	0.299866	305.56	418.965	365.384	260.47	300.014	220.377	246.548
SLC25A20	ENSG00000178537	788	solute carrier family 25 member 20 [Source:HGNC Symbol;Acc:HGNC:1421]	protein_coding	353.063	0.689581	0.329538	0.123377	0.204534	2.09257	0.0363877	0.300905	199.724	343.319	242.392	614.226	205.914	386.68	479.189
CLPB	ENSG00000162129	81570	caseinolytic mitochondrial matrix peptidase chaperone subunit B [Source:HGNC Symbol;Acc:HGNC:30664]	protein_coding	1011.14	-0.30388	0.145211	-0.187609	0.145977	-2.09268	0.0363774	0.300905	1046.42	1211.8	1141.04	891.657	985.287	905.995	895.792
ALDH3A1	ENSG00000108602	218	aldehyde dehydrogenase 3 family member A1 [Source:HGNC Symbol;Acc:HGNC:405]	protein_coding	23.5212	-1.89725	0.907035	-0.0370006	0.135882	-2.09171	0.0364643	0.301351	64.8675	13.0927	42.1942	4.84596	5.53532	26.5269	7.5861
RERE	ENSG00000142599	473	arginine-glutamic acid dipeptide repeats [Source:HGNC Symbol;Acc:HGNC:9965]	protein_coding	412.973	-0.45256	0.216436	-0.197381	0.226937	-2.09096	0.0365313	0.301717	389.205	577.532	494.66	336.794	358.689	393.822	340.11
RPUSD4	ENSG00000165526	84881	RNA pseudouridine synthase D4 [Source:HGNC Symbol;Acc:HGNC:25898]	protein_coding	707.903	0.362933	0.173693	0.195496	0.181105	2.08951	0.0366622	0.302236	669.16	522.252	636.953	814.122	699.665	835.597	777.576
SLC16A7	ENSG00000118596	9194	solute carrier family 16 member 7 [Source:HGNC Symbol;Acc:HGNC:10928]	protein_coding	61.9714	-1.12152	0.536609	-0.0693631	0.153188	-2.09001	0.0366169	0.302236	47.7971	128.017	91.5704	61.786	42.0685	26.5269	36.034
ZNF417	ENSG00000173480	147687	zinc finger protein 417 [Source:HGNC Symbol;Acc:HGNC:20646]	protein_coding	199.164	-0.601894	0.28805	-0.159738	0.243487	-2.08955	0.0366586	0.302236	211.673	311.314	219.5	147.802	147.24	184.668	171.952
FAM83G	ENSG00000188522	644815	family with sequence similarity 83 member G [Source:HGNC Symbol;Acc:HGNC:32554]	protein_coding	298.193	-0.489677	0.234383	-0.190735	0.241226	-2.08922	0.036688	0.302262	355.064	359.321	355.06	207.165	281.194	283.634	245.916
MOBP	ENSG00000168314	4336	myelin associated oligodendrocyte basic protein [Source:HGNC Symbol;Acc:HGNC:7189]	protein_coding	8.4668	-2.87162	1.37584	-0.0232752	0.131798	-2.08718	0.0368721	0.303591	11.9493	23.2758	14.8129	1.21149	0	6.12159	1.89653
ETNK2	ENSG00000143845	55224	ethanolamine kinase 2 [Source:HGNC Symbol;Acc:HGNC:25575]	protein_coding	498.099	0.416781	0.19983	0.195028	0.210224	2.08568	0.0370075	0.304518	445.537	381.142	430.471	457.943	644.312	557.064	570.222
PPP2R5A	ENSG00000066027	5525	protein phosphatase 2 regulatory subunit B'alpha [Source:HGNC Symbol;Acc:HGNC:9309]	protein_coding	458.161	0.39428	0.189153	0.196557	0.199117	2.08445	0.0371193	0.30453	384.084	363.685	419.249	540.325	505.928	493.808	500.051
ABHD14B	ENSG00000114779	84836	abhydrolase domain containing 14B [Source:HGNC Symbol;Acc:HGNC:28235]	protein_coding	967.062	0.328808	0.157686	0.191757	0.161897	2.08521	0.0370504	0.30453	940.579	711.368	883.385	1116.99	1010.75	1051.89	1054.47
F8A3	ENSG00000277150	474384	coagulation factor VIII associated 3 [Source:HGNC Symbol;Acc:HGNC:31850]	protein_coding	221.677	0.53708	0.257613	0.166375	0.239409	2.08483	0.0370849	0.30453	184.36	152.748	193.016	253.201	262.374	255.066	250.974
RBM11	ENSG00000185272	54033	RNA binding motif protein 11 [Source:HGNC Symbol;Acc:HGNC:9897]	protein_coding	57.9767	1.11743	0.536091	0.0642723	0.149746	2.08441	0.0371233	0.30453	52.9182	16.0021	35.91	84.8043	64.2097	75.4996	76.4932
HP1BP3	ENSG00000127483	50809	heterochromatin protein 1 binding protein 3 [Source:HGNC Symbol;Acc:HGNC:24973]	protein_coding	1704.4	-0.281976	0.135238	-0.18119	0.134688	-2.08504	0.0370659	0.30453	1649	2102.1	1932.85	1505.88	1606.35	1634.46	1500.15
JCAD	ENSG00000165757	57608	junctional cadherin 5 associated [Source:HGNC Symbol;Acc:HGNC:29283]	protein_coding	399.045	-0.501625	0.240836	-0.184473	0.241784	-2.08285	0.0372645	0.3055	524.061	421.875	490.62	238.664	406.293	393.822	317.984
CTSV	ENSG00000136943	1515	cathepsin V [Source:HGNC Symbol;Acc:HGNC:2538]	protein_coding	301.623	0.500391	0.240328	0.179768	0.241165	2.08212	0.0373318	0.305863	218.501	260.399	253.614	312.565	417.363	299.958	348.961
GET4	ENSG00000239857	51608	guided entry of tail-anchored proteins factor 4 [Source:HGNC Symbol;Acc:HGNC:21690]	protein_coding	63.7161	0.990884	0.476051	0.0746455	0.156964	2.08147	0.0373913	0.305975	30.7267	46.5517	45.3363	82.3813	60.8885	97.9454	82.1828
EFNB2	ENSG00000125266	1948	ephrin B2 [Source:HGNC Symbol;Acc:HGNC:3227]	protein_coding	224.177	-0.531597	0.255367	-0.17611	0.244766	-2.0817	0.0373703	0.305975	288.49	263.308	263.489	174.455	216.985	178.546	183.963
NIPSNAP2	ENSG00000146729	2631	nipsnap homolog 2 [Source:HGNC Symbol;Acc:HGNC:4179]	protein_coding	1161.01	0.390385	0.187618	0.196625	0.196878	2.08074	0.0374574	0.306327	1078.85	900.484	981.689	1704.57	1076.07	1050.87	1334.52
FKBP3	ENSG00000100442	2287	FKBP prolyl isomerase 3 [Source:HGNC Symbol;Acc:HGNC:3719]	protein_coding	2772.47	0.358206	0.172191	0.191689	0.17882	2.08029	0.0374992	0.306481	2502.52	2026.45	2645.67	4145.72	2701.24	2551.68	2834.04
UBE2T	ENSG00000077152	29089	ubiquitin conjugating enzyme E2 T [Source:HGNC Symbol;Acc:HGNC:25009]	protein_coding	1243.31	0.334327	0.160738	0.192077	0.165153	2.07995	0.0375299	0.306544	1118.11	1021.23	1110.52	1659.74	1274.23	1143.72	1375.61
PM20D1	ENSG00000162877	148811	peptidase M20 domain containing 1 [Source:HGNC Symbol;Acc:HGNC:26518]	protein_coding	6.87104	3.70053	1.78071	0.014586	0.130098	2.07812	0.037698	0.307728	1.70704	1.45474	0	4.84596	1.10706	19.385	19.5974
LBP	ENSG00000129988	3929	lipopolysaccharide binding protein [Source:HGNC Symbol;Acc:HGNC:6517]	protein_coding	5.49071	4.49321	2.16323	0.010399	0.129579	2.07708	0.0377941	0.308135	0	1.45474	0	2.42298	0	19.385	15.1722
MPPE1	ENSG00000154889	65258	metallophosphoesterase 1 [Source:HGNC Symbol;Acc:HGNC:15988]	protein_coding	225.849	-0.596069	0.286967	-0.154258	0.23476	-2.07714	0.0377891	0.308135	279.955	280.765	276.956	162.34	260.16	146.918	173.848
RPN1	ENSG00000163902	6184	ribophorin I [Source:HGNC Symbol;Acc:HGNC:10381]	protein_coding	5206.09	0.222107	0.106954	0.159649	0.104799	2.07666	0.0378326	0.308188	4525.36	4786.1	4965.9	5123.39	6023.54	5551.26	5467.05
GAPVD1	ENSG00000165219	26130	GTPase activating protein and VPS9 domains 1 [Source:HGNC Symbol;Acc:HGNC:23375]	protein_coding	947.795	-0.504452	0.242933	-0.179645	0.239233	-2.07651	0.0378468	0.308188	867.176	1319.45	1223.63	643.301	1254.3	619.301	707.404
RAC3	ENSG00000169750	5881	Rac family small GTPase 3 [Source:HGNC Symbol;Acc:HGNC:9803]	protein_coding	1340.89	0.354378	0.170794	0.194273	0.176753	2.07489	0.037997	0.308646	1365.63	964.493	1146.43	1385.95	1236.59	1744.65	1542.51
PRMT2	ENSG00000160310	3275	protein arginine methyltransferase 2 [Source:HGNC Symbol;Acc:HGNC:5186]	protein_coding	557.074	0.401487	0.193504	0.193958	0.202333	2.07482	0.0380029	0.308646	488.213	442.241	484.336	644.513	498.179	711.124	630.911
BECN1	ENSG00000126581	8678	beclin 1 [Source:HGNC Symbol;Acc:HGNC:1034]	protein_coding	1034.66	0.306565	0.147742	0.183507	0.149542	2.07501	0.037986	0.308646	870.59	871.39	995.155	1215.12	1160.2	1052.91	1077.23
ANXA5	ENSG00000164111	308	annexin A5 [Source:HGNC Symbol;Acc:HGNC:543]	protein_coding	2894.82	0.259495	0.125124	0.168777	0.123218	2.0739	0.0380884	0.308646	2432.53	2788.74	2592.25	2685.87	3372.12	3175.06	3217.14
SLC26A7	ENSG00000147606	115111	solute carrier family 26 member 7 [Source:HGNC Symbol;Acc:HGNC:14467]	protein_coding	5.75837	4.36634	2.10513	0.009668	0.129535	2.07414	0.0380661	0.308646	0	0	0	13.3264	18.8201	8.16212	0
CCDC144A	ENSG00000170160	9720	coiled-coil domain containing 144A [Source:HGNC Symbol;Acc:HGNC:29072]	protein_coding	12.5608	-2.21964	1.06994	-0.0312668	0.133955	-2.07455	0.0380286	0.308646	37.5549	8.72844	21.9949	4.84596	2.21413	8.16212	4.42523
MICU3	ENSG00000155970	286097	mitochondrial calcium uptake family member 3 [Source:HGNC Symbol;Acc:HGNC:27820]	protein_coding	107.652	-0.822332	0.396445	-0.0999334	0.178792	-2.07427	0.0380544	0.308646	133.149	152.748	142.293	112.669	48.7108	88.763	75.2289
DPYSL2	ENSG00000092964	1808	dihydropyrimidinase like 2 [Source:HGNC Symbol;Acc:HGNC:3014]	protein_coding	256.813	-0.502071	0.241971	-0.183986	0.241822	-2.07492	0.0379941	0.308646	302.146	320.043	302.541	253.201	200.379	205.073	214.307
CBX6	ENSG00000183741	23466	chromobox 6 [Source:HGNC Symbol;Acc:HGNC:1556]	protein_coding	1753.42	-0.258286	0.124606	-0.172864	0.122702	-2.07282	0.0381887	0.30927	1809.46	2038.09	1951.26	1536.17	1683.85	1680.38	1574.75
PRKCD	ENSG00000163932	5580	protein kinase C delta [Source:HGNC Symbol;Acc:HGNC:9399]	protein_coding	414.63	-0.438194	0.21145	-0.195848	0.220044	-2.07233	0.0382348	0.309456	493.335	481.519	485.682	296.815	367.545	433.612	343.903
REEP5	ENSG00000129625	7905	receptor accessory protein 5 [Source:HGNC Symbol;Acc:HGNC:30077]	protein_coding	1402.13	0.296195	0.142969	0.184885	0.145235	2.07174	0.0382894	0.309709	1169.32	1173.98	1382.98	1683.97	1418.15	1569.17	1417.34
TMED9	ENSG00000184840	54732	transmembrane p24 trafficking protein 9 [Source:HGNC Symbol;Acc:HGNC:24878]	protein_coding	3399.57	0.28668	0.138431	0.178236	0.139834	2.07092	0.0383663	0.310143	3082.91	2490.52	3509.75	3890.1	3661.06	3902.51	3260.13
HIKESHI	ENSG00000149196	51501	heat shock protein nuclear import factor hikeshi [Source:HGNC Symbol;Acc:HGNC:26938]	protein_coding	521.643	0.512798	0.247699	0.172224	0.238814	2.07025	0.0384288	0.31046	498.456	350.592	411.169	677.223	714.057	370.356	629.647
MRPL20	ENSG00000242485	55052	mitochondrial ribosomal protein L20 [Source:HGNC Symbol;Acc:HGNC:14478]	protein_coding	1249.61	0.354752	0.171427	0.191981	0.177423	2.06941	0.0385079	0.310848	1194.93	887.392	1155.4	1640.36	1402.65	1139.64	1326.94
PPP1CC	ENSG00000186298	5501	protein phosphatase 1 catalytic subunit gamma [Source:HGNC Symbol;Acc:HGNC:9283]	protein_coding	4650.5	0.249747	0.120695	0.167879	0.119189	2.06924	0.0385235	0.310848	4516.83	3628.12	4462.71	5501.38	4833.44	4779.94	4831.08
CNGA1	ENSG00000198515	1259	cyclic nucleotide gated channel subunit alpha 1 [Source:HGNC Symbol;Acc:HGNC:2148]	protein_coding	12.298	3.97283	1.9206	0.00455796	0.129115	2.06853	0.0385898	0.311038	0	0	38.6032	3.63447	38.7473	5.10132	0
SIN3A	ENSG00000169375	25942	SIN3 transcription regulator family member A [Source:HGNC Symbol;Acc:HGNC:19353]	protein_coding	1055.3	-0.294342	0.142298	-0.184161	0.142249	-2.06849	0.0385937	0.311038	1157.37	1197.25	1181.44	943.751	907.793	1060.05	939.412
NDUFB10	ENSG00000140990	4716	NADH:ubiquinone oxidoreductase subunit B10 [Source:HGNC Symbol;Acc:HGNC:7696]	protein_coding	3957.61	0.31335	0.151557	0.183642	0.154585	2.06755	0.0386827	0.311566	3803.29	2649.08	4000.37	4947.73	4305.37	4144.31	3853.11
RALY	ENSG00000125970	22913	RALY heterogeneous nuclear ribonucleoprotein [Source:HGNC Symbol;Acc:HGNC:15921]	protein_coding	2261.77	0.300584	0.145451	0.184428	0.146678	2.06656	0.0387757	0.312127	2277.19	1731.14	1992.11	2305.47	2152.13	2834.29	2540.08
NDUFB2	ENSG00000090266	4708	NADH:ubiquinone oxidoreductase subunit B2 [Source:HGNC Symbol;Acc:HGNC:7697]	protein_coding	1340.83	0.449481	0.217587	0.178889	0.221536	2.06575	0.038852	0.312552	1299.06	695.366	1343.48	1848.73	1643.99	1284.51	1270.67
CHPF	ENSG00000123989	79586	chondroitin polymerizing factor [Source:HGNC Symbol;Acc:HGNC:24291]	protein_coding	737.928	0.346109	0.1676	0.188735	0.171735	2.06509	0.038914	0.312862	624.777	615.355	679.147	805.641	720.699	923.339	796.541
PLA2G7	ENSG00000146070	7941	phospholipase A2 group VII [Source:HGNC Symbol;Acc:HGNC:9040]	protein_coding	26.2211	1.5549	0.753254	0.0424902	0.138043	2.06425	0.0389944	0.313319	11.9493	11.6379	13.9151	33.9217	56.4603	18.3648	37.2983
PBRM1	ENSG00000163939	55193	polybromo 1 [Source:HGNC Symbol;Acc:HGNC:30064]	protein_coding	902.965	-0.41933	0.203213	-0.193915	0.210162	-2.0635	0.0390649	0.313696	752.805	1306.36	1098.4	825.025	931.041	679.496	727.634
C8orf88	ENSG00000253250	100127983	chromosome 8 open reading frame 88 [Source:HGNC Symbol;Acc:HGNC:44672]	protein_coding	140.571	0.922822	0.447525	0.0799316	0.161072	2.06206	0.0392024	0.314611	162.169	33.459	84.8373	186.57	182.666	132.634	201.664
[truncated: 18,306 more rows]
