# Supplementary material for: Mutation at the Site of Hydroxylation in the Ribosomal Protein uL15 (RPL27a) Causes Specific Changes in the Repertoire of mRNAs Translated in Mammalian Cells
Source: Int J Mol Sci. 2023 Mar 24;24(7):6173. doi: 10.3390/ijms24076173 (PMC10094517; doi:10.3390/ijms24076173)
Supplement: Supplementary file 1 [file ijms-24-06173-s001.zip › Table S4.xlsx]

## Sheet: tDEGs up
hgnc_symbol	ensembl	entrez	description	gene_biotype	baseMean	log2FoldChange	lfcSE	LFC_Shrunken	lfcSE_Shrunken	stat	pvalue	padj	L15.T1	L15.T2	L15.T3	L15.T4	L15m.T1	L15m.T2	L15m.T3	L15m.T4
HEY2	ENSG00000135547	23493	hes related family bHLH transcription factor with YRPW motif 2 [Source:HGNC Symbol;Acc:HGNC:4881]	protein_coding	100.682	7.91583	1.90452	6.801	2.18514	4.15635	3.23375e-05	0.00344991	1.18054	1.21051	1.16043	0	608.91	2.95583	0.960257	189.076
GPC6	ENSG00000183098	10082	glypican 6 [Source:HGNC Symbol;Acc:HGNC:4454]	protein_coding	167.775	2.22932	0.333903	2.1262	0.342001	6.67654	2.44644e-11	5.8072e-08	75.5544	27.8416	61.5028	69.4026	235.018	319.23	276.554	277.094
H2BC11	ENSG00000124635	8970	H2B clustered histone 11 [Source:HGNC Symbol;Acc:HGNC:4761]	protein_coding	105.289	2.12105	0.419431	1.941	0.440706	5.05697	4.25961e-07	0.000173755	21.2497	48.4203	42.936	43.8332	221.665	203.952	92.1847	168.068
PDE9A	ENSG00000160191	5152	phosphodiesterase 9A [Source:HGNC Symbol;Acc:HGNC:8795]	protein_coding	262.89	2.06868	0.628141	1.56992	0.772662	3.29334	0.000990054	0.0376084	144.026	124.682	54.5403	80.7667	180.269	972.468	97.9462	448.422
ZNF75D	ENSG00000186376	7626	zinc finger protein 75D [Source:HGNC Symbol;Acc:HGNC:13145]	protein_coding	199.885	1.71568	0.384305	1.52739	0.410481	4.46438	8.03025e-06	0.00139214	121.595	66.5778	87.0323	98.6247	514.102	183.262	221.819	306.071
SMIM26	ENSG00000232388	388789	small integral membrane protein 26 [Source:HGNC Symbol;Acc:HGNC:43430]	protein_coding	299.777	1.51686	0.419236	1.24031	0.476107	3.61817	0.000296698	0.0167662	191.247	61.7358	217.001	151.387	685.024	348.788	285.196	457.839
KLHL2	ENSG00000109466	11275	kelch like family member 2 [Source:HGNC Symbol;Acc:HGNC:6353]	protein_coding	192.931	1.49206	0.41708	1.21119	0.475324	3.5774	0.00034703	0.0184893	110.97	118.63	76.5885	100.654	256.383	112.322	470.526	297.378
TRIP4	ENSG00000103671	9325	thyroid hormone receptor interactor 4 [Source:HGNC Symbol;Acc:HGNC:12310]	protein_coding	247.114	1.44566	0.391794	1.19311	0.441534	3.68985	0.000224384	0.0136684	187.705	123.472	85.8719	132.311	409.946	508.403	162.283	366.923
SFR1	ENSG00000156384	119392	SWI5 dependent homologous recombination repair protein 1 [Source:HGNC Symbol;Acc:HGNC:29574]	protein_coding	153.568	1.48723	0.438356	1.16452	0.515039	3.39275	0.000691942	0.0300686	76.7349	37.5257	129.968	79.955	276.413	118.233	274.633	235.077
TMEM128	ENSG00000132406	85013	transmembrane protein 128 [Source:HGNC Symbol;Acc:HGNC:28201]	protein_coding	191.377	1.47272	0.460683	1.09557	0.56912	3.19681	0.00138958	0.0455606	59.0269	151.313	99.7971	96.1895	502.084	177.35	147.88	297.378
DYNC2LI1	ENSG00000138036	51626	dynein cytoplasmic 2 light intermediate chain 1 [Source:HGNC Symbol;Acc:HGNC:24595]	protein_coding	356.519	1.2672	0.336238	1.06445	0.3736	3.76875	0.00016407	0.0106331	120.415	151.313	351.611	213.078	415.287	570.475	521.42	508.549
PTRHD1	ENSG00000184924	391356	peptidyl-tRNA hydrolase domain containing 1 [Source:HGNC Symbol;Acc:HGNC:33782]	protein_coding	534.343	1.09619	0.220523	1.00206	0.231109	4.97086	6.66566e-07	0.000256795	363.605	228.786	407.311	362.842	893.335	623.68	688.504	706.68
FAM102B	ENSG00000162636	284611	family with sequence similarity 102 member B [Source:HGNC Symbol;Acc:HGNC:27637]	protein_coding	388.215	1.08592	0.224885	0.986439	0.236675	4.8288	1.3736e-06	0.000399269	275.065	206.997	247.172	263.405	363.209	605.945	627.048	516.88
SKA2	ENSG00000182628	348235	spindle and kinetochore associated complex subunit 2 [Source:HGNC Symbol;Acc:HGNC:28006]	protein_coding	1459.07	1.06323	0.236526	0.945986	0.251822	4.49518	6.9512e-06	0.0012685	748.461	765.04	1286.92	972.854	1615.75	2745.97	1572.9	1964.65
MRPL57	ENSG00000173141	78988	mitochondrial ribosomal protein L57 [Source:HGNC Symbol;Acc:HGNC:14514]	protein_coding	505.164	0.977163	0.185275	0.903901	0.192627	5.27412	1.33395e-07	6.85206e-05	296.315	313.521	387.584	365.683	814.551	529.094	689.464	645.104
MRPL47	ENSG00000136522	57129	mitochondrial ribosomal protein L47 [Source:HGNC Symbol;Acc:HGNC:16652]	protein_coding	633.254	0.974445	0.208027	0.879602	0.219489	4.68424	2.81005e-06	0.000649544	308.12	381.309	567.451	451.32	958.766	786.251	801.815	810.998
TPGS1	ENSG00000141933	91978	tubulin polyglutamylase complex subunit 1 [Source:HGNC Symbol;Acc:HGNC:25058]	protein_coding	119.256	0.97619	0.233862	0.852967	0.251228	4.17422	2.9901e-05	0.00329857	68.4712	81.1039	84.7115	86.8547	170.922	144.836	169.005	148.146
PRDM5	ENSG00000138738	11107	PR/SET domain 5 [Source:HGNC Symbol;Acc:HGNC:9349]	protein_coding	156.418	1.13791	0.354937	0.85254	0.430582	3.20594	0.0013462	0.0445597	139.303	47.2097	105.599	98.2189	237.689	233.511	172.846	216.966
DYRK4	ENSG00000010219	8798	dual specificity tyrosine phosphorylation regulated kinase 4 [Source:HGNC Symbol;Acc:HGNC:3095]	protein_coding	432.835	0.905836	0.175368	0.835131	0.182727	5.16533	2.40015e-07	0.000110959	324.648	221.523	335.365	321.444	574.191	570.475	571.353	543.684
GAS2L3	ENSG00000139354	283431	growth arrest specific 2 like 3 [Source:HGNC Symbol;Acc:HGNC:27475]	protein_coding	237.331	0.96941	0.249051	0.824731	0.272642	3.89241	9.92528e-05	0.00760517	115.693	220.312	136.931	167.621	300.449	345.832	302.481	309.331
IFITM1	ENSG00000185885	8519	interferon induced transmembrane protein 1 [Source:HGNC Symbol;Acc:HGNC:5412]	protein_coding	346.161	1.00249	0.278973	0.818323	0.314276	3.5935	0.000326269	0.0178601	169.997	162.208	352.771	235.806	429.976	514.315	450.36	453.855
PPIL3	ENSG00000240344	53938	peptidylprolyl isomerase like 3 [Source:HGNC Symbol;Acc:HGNC:9262]	protein_coding	458.253	1.0395	0.308253	0.816296	0.358004	3.37224	0.000745581	0.0314444	257.357	311.1	335.365	297.903	1005.5	378.346	457.082	623.371
COX18	ENSG00000163626	285521	cytochrome c oxidase assembly factor COX18 [Source:HGNC Symbol;Acc:HGNC:26801]	protein_coding	202.226	1.07261	0.33967	0.794539	0.414754	3.15779	0.00158972	0.0498818	80.2765	123.472	189.15	130.282	235.018	195.085	372.58	291.945
CHRAC1	ENSG00000104472	54108	chromatin accessibility complex subunit 1 [Source:HGNC Symbol;Acc:HGNC:13544]	protein_coding	364.285	0.945587	0.260177	0.779909	0.290478	3.63439	0.000278634	0.0161548	329.37	167.05	247.172	254.07	409.946	404.949	617.445	484.281
CEP83	ENSG00000173588	51134	centrosomal protein 83 [Source:HGNC Symbol;Acc:HGNC:17966]	protein_coding	349.181	1.03086	0.323151	0.774244	0.390441	3.19003	0.00142256	0.0464222	151.109	249.364	287.787	226.472	395.257	718.267	295.759	469.43
MBIP	ENSG00000151332	51562	MAP3K12 binding inhibitory protein 1 [Source:HGNC Symbol;Acc:HGNC:20427]	protein_coding	601.544	0.834108	0.158354	0.772069	0.164551	5.26738	1.38388e-07	6.85465e-05	378.952	527.781	364.375	457.408	799.862	753.737	779.729	750.508
MROH8	ENSG00000101353	140699	maestro heat like repeat family member 8 [Source:HGNC Symbol;Acc:HGNC:16125]	protein_coding	484.549	0.926586	0.259628	0.756285	0.291764	3.5689	0.000358479	0.0187645	289.232	238.47	471.135	339.301	598.227	505.447	826.781	607.796
RPS29	ENSG00000213741	6235	ribosomal protein S29 [Source:HGNC Symbol;Acc:HGNC:10419]	protein_coding	6779.3	0.809152	0.167191	0.737178	0.175221	4.83969	1.30041e-06	0.000399269	4012.65	4020.09	6591.25	5083.84	9670.45	7487.12	8973.6	8395.41
RB1	ENSG00000139687	5925	RB transcriptional corepressor 1 [Source:HGNC Symbol;Acc:HGNC:9884]	protein_coding	608.235	0.864428	0.222702	0.736306	0.242985	3.88155	0.000103792	0.00786605	371.869	430.94	480.418	443.202	546.149	741.914	1069.73	781.659
SNX2	ENSG00000205302	6643	sorting nexin 2 [Source:HGNC Symbol;Acc:HGNC:11173]	protein_coding	1482.43	0.762619	0.12052	0.724364	0.1235	6.32773	2.48796e-10	3.45055e-07	914.916	1054.35	1253.27	1171.32	1816.05	1912.42	1938.76	1798.39
EXTL2	ENSG00000162694	2135	exostosin like glycosyltransferase 2 [Source:HGNC Symbol;Acc:HGNC:3516]	protein_coding	413.309	0.8201	0.196067	0.718497	0.21007	4.18275	2.88003e-05	0.00329422	310.481	223.944	353.931	307.238	618.257	493.624	470.526	528.471
SVIP	ENSG00000198168	258010	small VCP interacting protein [Source:HGNC Symbol;Acc:HGNC:25238]	protein_coding	473.406	0.884885	0.269378	0.68432	0.314636	3.28492	0.00102012	0.0380324	367.147	421.256	213.519	330.778	817.221	449.286	558.87	629.167
PSMA7	ENSG00000101182	5688	proteasome 20S subunit alpha 7 [Source:HGNC Symbol;Acc:HGNC:9536]	protein_coding	1556.64	0.714563	0.107402	0.682692	0.109787	6.6532	2.86794e-11	5.8072e-08	1260.81	1054.35	1144.19	1244.78	1829.4	2190.27	1852.34	1877
PHPT1	ENSG00000054148	29085	phosphohistidine phosphatase 1 [Source:HGNC Symbol;Acc:HGNC:30033]	protein_coding	517.693	0.814785	0.221539	0.678138	0.245041	3.67784	0.00023522	0.0141224	251.454	382.52	488.541	379.076	599.563	635.504	763.404	641.482
ATP5ME	ENSG00000169020	521	ATP synthase membrane subunit e [Source:HGNC Symbol;Acc:HGNC:846]	protein_coding	1433.28	0.793636	0.20665	0.675003	0.225461	3.84049	0.000122789	0.00873315	965.679	743.251	1416.89	1070.26	2215.31	1551.81	1711.18	1791.88
WDR61	ENSG00000140395	80349	WD repeat domain 61 [Source:HGNC Symbol;Acc:HGNC:30300]	protein_coding	609.912	0.751557	0.166916	0.673671	0.176169	4.5026	6.71285e-06	0.00124134	518.256	393.415	435.162	475.266	785.173	617.769	899.761	754.493
ATP5F1E	ENSG00000124172	514	ATP synthase F1 subunit epsilon [Source:HGNC Symbol;Acc:HGNC:838]	protein_coding	2387.31	0.742678	0.160924	0.67029	0.169437	4.61509	3.92934e-06	0.000865016	1585.46	1405.4	2302.3	1849.52	2676	3079.98	3282.16	2917.64
COMMD6	ENSG00000188243	170622	COMM domain containing 6 [Source:HGNC Symbol;Acc:HGNC:24015]	protein_coding	1021.49	0.71899	0.147678	0.656438	0.154456	4.86864	1.12367e-06	0.000390898	711.864	660.936	901.655	808.885	1089.63	1430.62	1332.84	1235.51
TMEM258	ENSG00000134825	746	transmembrane protein 258 [Source:HGNC Symbol;Acc:HGNC:1164]	protein_coding	1365.86	0.754441	0.188163	0.651844	0.202996	4.00951	6.08452e-05	0.00534471	694.156	1056.77	1271.83	1041.04	1817.38	1876.95	1482.64	1686.11
UQCC2	ENSG00000137288	84300	ubiquinol-cytochrome c reductase complex assembly factor 2 [Source:HGNC Symbol;Acc:HGNC:21237]	protein_coding	553.705	0.712366	0.150703	0.646474	0.158002	4.72696	2.27907e-06	0.000564436	413.188	352.257	469.975	442.797	785.173	641.415	661.617	663.215
ATOX1	ENSG00000177556	475	antioxidant 1 copper chaperone [Source:HGNC Symbol;Acc:HGNC:798]	protein_coding	383.182	0.721639	0.170667	0.636065	0.181914	4.22836	2.35405e-05	0.00288923	244.371	262.68	343.488	304.803	526.12	472.933	456.122	454.941
RBX1	ENSG00000100387	9978	ring-box 1 [Source:HGNC Symbol;Acc:HGNC:9928]	protein_coding	1079.27	0.692604	0.146429	0.628797	0.153542	4.72995	2.24573e-06	0.000564436	809.849	708.146	917.901	860.024	1539.63	1398.11	1105.26	1295.28
RPL37	ENSG00000145592	6167	ribosomal protein L37 [Source:HGNC Symbol;Acc:HGNC:10347]	protein_coding	12355.9	0.706977	0.150189	0.627277	0.158241	4.70726	2.51072e-06	0.000610899	7197.74	8358.55	12329.6	9664.41	16069.3	14746.6	15539.8	14941
RPS21	ENSG00000171858	6227	ribosomal protein S21 [Source:HGNC Symbol;Acc:HGNC:10409]	protein_coding	5304.27	0.63683	0.0841295	0.616194	0.0854218	7.56964	3.74252e-14	2.59525e-10	3909.94	3775.57	4534.96	4385.35	6687.33	6251.58	6703.55	6185.9
TOMM7	ENSG00000196683	54543	translocase of outer mitochondrial membrane 7 [Source:HGNC Symbol;Acc:HGNC:21648]	protein_coding	1513.22	0.638985	0.0979866	0.609931	0.100071	6.52114	6.97741e-11	1.20962e-07	1107.34	1239.56	1140.7	1247.62	2033.71	1690.74	1860.02	1786.08
FSD1	ENSG00000105255	79187	fibronectin type III and SPRY domain containing 1 [Source:HGNC Symbol;Acc:HGNC:13745]	protein_coding	407.646	0.686589	0.162186	0.605549	0.172665	4.23333	2.30257e-05	0.00287696	244.371	332.889	341.167	328.343	502.084	532.05	494.532	485.73
MPG	ENSG00000103152	4350	N-methylpurine DNA glycosylase [Source:HGNC Symbol;Acc:HGNC:7211]	protein_coding	673.954	0.674606	0.160289	0.594149	0.170697	4.2087	2.56849e-05	0.0030709	428.535	467.255	638.237	540.61	893.335	836.5	790.291	796.872
POC1B	ENSG00000139323	282809	POC1 centriolar protein B [Source:HGNC Symbol;Acc:HGNC:30836]	protein_coding	318.467	0.757341	0.231451	0.587338	0.268064	3.27215	0.00106734	0.039265	286.871	181.576	234.407	240.677	420.629	487.712	299.6	396.263
ACOT8	ENSG00000101473	10005	acyl-CoA thioesterase 8 [Source:HGNC Symbol;Acc:HGNC:15919]	protein_coding	325.967	0.710988	0.20315	0.578955	0.226662	3.49981	0.000465585	0.0225776	247.913	182.786	301.712	257.317	399.263	369.479	452.281	396.987
YPEL5	ENSG00000119801	51646	yippee like 5 [Source:HGNC Symbol;Acc:HGNC:18329]	protein_coding	510.006	0.666838	0.166616	0.577722	0.179192	4.00225	6.27442e-05	0.00547295	328.189	429.73	407.311	405.863	540.808	756.693	601.121	610.331
RPL41	ENSG00000229117	6171	ribosomal protein L41 [Source:HGNC Symbol;Acc:HGNC:10354]	protein_coding	32950.7	0.633094	0.137503	0.573627	0.144322	4.6042	4.14047e-06	0.000897253	21172.9	22996	32181.1	26989.1	46335.9	36705.5	38830.9	38394
MRPL27	ENSG00000108826	51264	mitochondrial ribosomal protein L27 [Source:HGNC Symbol;Acc:HGNC:14483]	protein_coding	802.319	0.644838	0.154218	0.567417	0.164252	4.18135	2.8978e-05	0.00329422	692.975	497.518	661.446	646.946	1040.22	1078.88	842.145	958.42
TPRKB	ENSG00000144034	51002	TP53RK binding protein [Source:HGNC Symbol;Acc:HGNC:24259]	protein_coding	612.665	0.678842	0.188436	0.56222	0.207842	3.6025	0.000315172	0.0176255	481.659	347.415	573.253	482.165	658.317	750.781	865.191	742.54
ATG101	ENSG00000123395	60673	autophagy related 101 [Source:HGNC Symbol;Acc:HGNC:25679]	protein_coding	586.131	0.611329	0.129105	0.556153	0.135065	4.73515	2.18894e-06	0.000564436	420.271	475.729	467.654	483.789	646.299	812.854	697.147	685.31
HRAS	ENSG00000174775	3265	HRas proto-oncogene, GTPase [Source:HGNC Symbol;Acc:HGNC:5173]	protein_coding	341.406	0.709086	0.215314	0.555679	0.246453	3.29327	0.000990307	0.0376084	232.566	214.26	324.921	265.029	344.515	422.684	511.817	415.46
COX5B	ENSG00000135940	1329	cytochrome c oxidase subunit 5B [Source:HGNC Symbol;Acc:HGNC:2269]	protein_coding	3032.92	0.616006	0.136786	0.554522	0.14381	4.50344	6.68626e-06	0.00124134	1938.44	2241.86	2917.32	2483.88	4060.73	3360.78	3695.07	3565.28
USF3	ENSG00000176542	205717	upstream transcription factor family member 3 [Source:HGNC Symbol;Acc:HGNC:30494]	protein_coding	334.445	0.64534	0.168982	0.549928	0.182859	3.819	0.000133995	0.00924567	221.941	295.364	256.455	271.522	423.299	360.611	452.281	394.089
POMP	ENSG00000132963	51371	proteasome maturation protein [Source:HGNC Symbol;Acc:HGNC:20330]	protein_coding	1472.16	0.609083	0.134329	0.548295	0.141101	4.53425	5.78092e-06	0.00112923	989.29	1048.3	1409.92	1215.15	1904.18	1723.25	1760.15	1727.04
SAP18	ENSG00000150459	10284	Sin3A associated protein 18 [Source:HGNC Symbol;Acc:HGNC:10530]	protein_coding	1490.5	0.6233	0.163514	0.531133	0.17698	3.8119	0.000137901	0.00942144	905.472	1089.46	1493.47	1202.98	1964.27	1868.09	1636.28	1763.98
HPS6	ENSG00000166189	79803	HPS6 biogenesis of lysosomal organelles complex 2 subunit 3 [Source:HGNC Symbol;Acc:HGNC:18817]	protein_coding	196.851	0.645527	0.186218	0.524398	0.207529	3.46652	0.000527244	0.0248719	147.567	147.682	153.177	161.533	252.377	271.936	211.257	229.282
RPL27	ENSG00000131469	6155	ribosomal protein L27 [Source:HGNC Symbol;Acc:HGNC:10328]	protein_coding	18521.9	0.596035	0.133464	0.517519	0.141017	4.46589	7.97379e-06	0.00139214	12472.4	12486.4	18171.2	15864.4	24898.5	21618.9	21804.6	20858.5
GGPS1	ENSG00000152904	9453	geranylgeranyl diphosphate synthase 1 [Source:HGNC Symbol;Acc:HGNC:4249]	protein_coding	484.744	0.572596	0.129326	0.513138	0.135894	4.42755	9.53086e-06	0.00159257	368.328	386.152	394.547	410.328	650.305	532.05	578.075	558.173
TAF1D	ENSG00000166012	79101	TATA-box binding protein associated factor, RNA polymerase I subunit D [Source:HGNC Symbol;Acc:HGNC:28759]	protein_coding	1790.64	0.591724	0.150775	0.510922	0.161827	3.92454	8.6895e-05	0.00700667	1338.73	1174.19	1730.2	1465.17	2279.41	2409	1812	2116.42
NDUFA3	ENSG00000170906	4696	NADH:ubiquinone oxidoreductase subunit A3 [Source:HGNC Symbol;Acc:HGNC:7686]	protein_coding	926.944	0.554604	0.115024	0.507359	0.119656	4.82164	1.42382e-06	0.000403	702.42	697.252	786.772	814.973	1115	1055.23	1213.76	1030.14
RPS25	ENSG00000118181	6230	ribosomal protein S25 [Source:HGNC Symbol;Acc:HGNC:10413]	protein_coding	12606.5	0.595659	0.152929	0.503727	0.164877	3.89501	9.81946e-05	0.00760517	8259.04	8643.02	13053.7	10205	17671.7	14616.6	13460.9	14941.7
COMMD4	ENSG00000140365	54939	COMM domain containing 4 [Source:HGNC Symbol;Acc:HGNC:26027]	protein_coding	1085.14	0.55249	0.11955	0.500872	0.124855	4.62143	3.81105e-06	0.000852507	844.084	813.46	946.912	919.28	1301.95	1135.04	1468.23	1252.18
MSRB1	ENSG00000198736	51734	methionine sulfoxide reductase B1 [Source:HGNC Symbol;Acc:HGNC:14133]	protein_coding	412.356	0.623621	0.185226	0.498898	0.207913	3.36682	0.000760413	0.0318615	318.745	294.153	351.611	331.184	377.898	573.431	561.75	490.076
TEDC1	ENSG00000185347	283643	tubulin epsilon and delta complex 1 [Source:HGNC Symbol;Acc:HGNC:20127]	protein_coding	270.682	0.598363	0.166245	0.497901	0.181897	3.59928	0.000319094	0.0177702	191.247	199.734	242.53	226.472	321.814	325.141	346.653	311.867
ATP5MK	ENSG00000173915	84833	ATP synthase membrane subunit k [Source:HGNC Symbol;Acc:HGNC:30889]	protein_coding	1245.91	0.582013	0.152627	0.497486	0.164619	3.81331	0.000137116	0.00941419	845.265	875.196	1242.82	1024.4	1354.02	1655.27	1509.52	1460.81
LAMTOR5	ENSG00000134248	10542	late endosomal/lysosomal adaptor, MAPK and MTOR activator 5 [Source:HGNC Symbol;Acc:HGNC:17955]	protein_coding	838.43	0.555697	0.127043	0.49704	0.133661	4.37408	1.21944e-05	0.00185947	571.38	656.094	776.328	709.449	1016.19	1002.03	1009.23	966.75
RPS23	ENSG00000186468	6228	ribosomal protein S23 [Source:HGNC Symbol;Acc:HGNC:10410]	protein_coding	17929.3	0.559374	0.133739	0.494014	0.141627	4.18259	2.88203e-05	0.00329422	12039.1	12816.8	18253.6	14876.1	23915.7	20135.1	20490	20907.7
PSMB7	ENSG00000136930	5695	proteasome 20S subunit beta 7 [Source:HGNC Symbol;Acc:HGNC:9544]	protein_coding	1866.62	0.549574	0.12944	0.487809	0.136595	4.24578	2.17832e-05	0.00282347	1334.01	1504.66	1661.74	1566.63	2550.48	1829.66	2313.26	2172.56
NDUFA1	ENSG00000125356	4694	NADH:ubiquinone oxidoreductase subunit A1 [Source:HGNC Symbol;Acc:HGNC:7683]	protein_coding	1949.76	0.557427	0.137231	0.487751	0.145966	4.06197	4.86603e-05	0.00455993	1483.94	1296.45	1879.9	1646.99	2591.87	2352.84	2114.49	2231.6
SUB1	ENSG00000113387	10923	SUB1 regulator of transcription [Source:HGNC Symbol;Acc:HGNC:19985]	protein_coding	3311.3	0.545358	0.126199	0.486373	0.132898	4.3214	1.55041e-05	0.00215026	2506.28	2233.38	3245.73	2786.25	4262.37	3691.83	3937.05	3827.52
PFDN4	ENSG00000101132	5203	prefoldin subunit 4 [Source:HGNC Symbol;Acc:HGNC:8868]	protein_coding	1141.14	0.548161	0.132945	0.482283	0.140978	4.12323	3.7359e-05	0.00376203	768.53	878.828	1093.13	963.925	1428.8	1386.28	1294.43	1315.2
RPS27	ENSG00000177954	6232	ribosomal protein S27 [Source:HGNC Symbol;Acc:HGNC:10416]	protein_coding	17510	0.551722	0.142794	0.478732	0.15288	3.86375	0.000111658	0.00811059	12616.4	11663.2	18070.2	14458.5	24031.9	19824.8	18825.8	20589.4
TRAPPC6A	ENSG00000007255	79090	trafficking protein particle complex 6A [Source:HGNC Symbol;Acc:HGNC:23069]	protein_coding	221.773	0.60803	0.186273	0.477686	0.210731	3.26418	0.00109782	0.0398577	151.109	185.207	183.348	183.45	248.371	257.157	307.282	258.259
BRK1	ENSG00000254999	55845	BRICK1 subunit of SCAR/WAVE actin nucleating complex [Source:HGNC Symbol;Acc:HGNC:23057]	protein_coding	1554.52	0.5685	0.162424	0.467317	0.178557	3.5001	0.000465083	0.0225776	1028.25	1348.5	1361.19	1270.76	2326.14	1738.03	1518.17	1845.12
RPL24	ENSG00000114391	6152	ribosomal protein L24 [Source:HGNC Symbol;Acc:HGNC:10325]	protein_coding	23274	0.535402	0.134112	0.466911	0.14276	3.99219	6.54651e-05	0.00550264	15513.4	16988.2	24070.8	19445.3	30374.7	25869.4	26934.2	26995.8
RASA1	ENSG00000145715	5921	RAS p21 protein activator 1 [Source:HGNC Symbol;Acc:HGNC:9871]	protein_coding	286.366	0.605358	0.191905	0.46339	0.220689	3.15448	0.00160787	0.049887	230.205	171.892	270.38	234.589	343.18	357.656	347.613	335.411
SNRPG	ENSG00000143977	6637	small nuclear ribonucleoprotein polypeptide G [Source:HGNC Symbol;Acc:HGNC:11163]	protein_coding	1826.58	0.539536	0.142576	0.461526	0.153318	3.78419	0.00015421	0.0102332	1384.77	1205.66	1802.15	1559.73	2390.24	2202.09	1995.41	2072.59
RPL37A	ENSG00000197756	6168	ribosomal protein L37a [Source:HGNC Symbol;Acc:HGNC:10348]	protein_coding	15659.9	0.523148	0.128572	0.458194	0.136353	4.0689	4.72362e-05	0.00449485	10059.4	12232.2	15944.3	13169	19137.9	17977.4	18675.1	18083.6
RPS7	ENSG00000171863	6201	ribosomal protein S7 [Source:HGNC Symbol;Acc:HGNC:10440]	protein_coding	16583.6	0.522571	0.128821	0.457193	0.13668	4.05658	4.97974e-05	0.00460427	11546.8	12053	16904	13944.6	21824.6	19345.9	17867.5	19182.5
ITGB3BP	ENSG00000142856	23421	integrin subunit beta 3 binding protein [Source:HGNC Symbol;Acc:HGNC:6157]	protein_coding	1595.45	0.515565	0.125766	0.453625	0.133123	4.0994	4.14225e-05	0.00407439	1158.11	1166.93	1561.94	1362.48	1984.3	1933.11	1772.63	1824.11
ATP6V1G1	ENSG00000136888	9550	ATPase H+ transporting V1 subunit G1 [Source:HGNC Symbol;Acc:HGNC:864]	protein_coding	1335.15	0.548375	0.159454	0.449104	0.175811	3.43908	0.000583694	0.0268055	845.265	1126.98	1262.55	1096.64	1491.56	1891.73	1393.33	1573.1
ATP6V1E1	ENSG00000131100	529	ATPase H+ transporting V1 subunit E1 [Source:HGNC Symbol;Acc:HGNC:857]	protein_coding	1362.88	0.562161	0.169869	0.448051	0.189889	3.30938	0.000935026	0.0365105	992.832	951.458	1342.62	1114.09	1969.61	1625.71	1296.35	1610.41
NDUFS5	ENSG00000168653	4725	NADH:ubiquinone oxidoreductase subunit S5 [Source:HGNC Symbol;Acc:HGNC:7712]	protein_coding	2304.08	0.532289	0.148821	0.443923	0.161874	3.57671	0.00034795	0.0184893	1506.37	1704.39	2403.25	1919.73	2909.68	2725.28	2593.65	2670.25
PIGW	ENSG00000277161	284098	phosphatidylinositol glycan anchor biosynthesis class W [Source:HGNC Symbol;Acc:HGNC:23213]	protein_coding	281.631	0.558364	0.170724	0.442403	0.191003	3.27057	0.00107333	0.0393106	213.677	231.207	232.086	237.43	349.856	277.848	383.143	327.804
CBX3	ENSG00000122565	11335	chromobox 3 [Source:HGNC Symbol;Acc:HGNC:1553]	protein_coding	3220.04	0.512298	0.135776	0.438641	0.145629	3.7731	0.000161229	0.0105476	2950.16	2155.91	2818.69	2690.47	4406.59	3762.77	3207.26	3768.48
RPL39	ENSG00000198918	6170	ribosomal protein L39 [Source:HGNC Symbol;Acc:HGNC:10350]	protein_coding	35279.7	0.518007	0.136415	0.434207	0.146637	3.79728	0.000146291	0.00980147	25761.7	23264.7	37517.9	29508.3	43258	40447.6	41508.1	40971.2
RPL31	ENSG00000071082	6160	ribosomal protein L31 [Source:HGNC Symbol;Acc:HGNC:10334]	protein_coding	14787.3	0.476052	0.103607	0.43293	0.107849	4.59479	4.33188e-06	0.000924289	10956.6	11189.9	14579.7	12751.4	18547.7	16561.5	16937	16774.9
MCTS1	ENSG00000232119	28985	MCTS1 re-initiation and release factor [Source:HGNC Symbol;Acc:HGNC:23357]	protein_coding	1388.83	0.469521	0.0970983	0.431133	0.100626	4.83553	1.32794e-06	0.000399269	1174.63	1267.4	1054.83	1157.93	1524.95	1735.07	1557.54	1638.3
NDUFB9	ENSG00000147684	4715	NADH:ubiquinone oxidoreductase subunit B9 [Source:HGNC Symbol;Acc:HGNC:7704]	protein_coding	2421.77	0.481205	0.109082	0.431092	0.114144	4.41139	1.0271e-05	0.00165637	1861.71	1778.23	2342.91	2099.94	2991.14	2828.73	2730.97	2740.51
ORC4	ENSG00000115947	5000	origin recognition complex subunit 4 [Source:HGNC Symbol;Acc:HGNC:8490]	protein_coding	928.291	0.536767	0.162138	0.429698	0.180279	3.31055	0.000931123	0.0365105	775.613	595.569	887.73	770.734	1281.92	1061.14	966.979	1086.64
RPS19BP1	ENSG00000187051	91582	ribosomal protein S19 binding protein 1 [Source:HGNC Symbol;Acc:HGNC:28749]	protein_coding	1409.16	0.53425	0.160584	0.428517	0.17825	3.32692	0.000878126	0.0352866	907.833	1004.72	1425.01	1262.64	1663.82	1755.76	1724.62	1528.91
MRPS14	ENSG00000120333	63931	mitochondrial ribosomal protein S14 [Source:HGNC Symbol;Acc:HGNC:14049]	protein_coding	597.902	0.524578	0.153719	0.427301	0.169269	3.41257	0.00064354	0.0285152	449.785	514.465	489.702	500.023	705.054	851.279	579.995	692.916
RPS12	ENSG00000112306	6206	ribosomal protein S12 [Source:HGNC Symbol;Acc:HGNC:10385]	protein_coding	15028.6	0.474231	0.110764	0.426047	0.116021	4.28145	1.85682e-05	0.00247618	10941.2	11304.9	15098.4	12977.1	18836.1	16863	17150.2	17057.8
RPS5	ENSG00000083845	6193	ribosomal protein S5 [Source:HGNC Symbol;Acc:HGNC:10426]	protein_coding	14928.2	0.528897	0.16661	0.421299	0.186603	3.17447	0.00150113	0.0478601	9268.4	10251.8	14945.2	14418.7	20076.7	16984.2	18480.1	15000.8
PDCD5	ENSG00000105185	9141	programmed cell death 5 [Source:HGNC Symbol;Acc:HGNC:8764]	protein_coding	1565.23	0.52755	0.160756	0.418257	0.179016	3.28167	0.00103193	0.038267	1018.8	1141.51	1665.22	1303.63	1976.29	1761.68	1836.01	1818.68
TCEAL9	ENSG00000185222	51186	transcription elongation factor A like 9 [Source:HGNC Symbol;Acc:HGNC:30084]	protein_coding	1888.59	0.529529	0.164933	0.415504	0.185146	3.21056	0.00132476	0.0442	1241.93	1349.71	2030.75	1557.7	2274.06	2429.69	2005.98	2218.93
SFT2D1	ENSG00000198818	113402	SFT2 domain containing 1 [Source:HGNC Symbol;Acc:HGNC:21102]	protein_coding	885.833	0.461105	0.109907	0.410328	0.115366	4.19541	2.72376e-05	0.00320134	756.724	689.989	757.762	773.981	1147.05	1016.81	946.813	997.539
RPS13	ENSG00000110700	6207	ribosomal protein S13 [Source:HGNC Symbol;Acc:HGNC:10386]	protein_coding	11455.3	0.482214	0.130718	0.410064	0.140218	3.68897	0.000225162	0.0136684	7782.1	8530.44	11668.1	10251.3	14612.5	12828.3	13435.9	12534.1
UQCRB	ENSG00000156467	7381	ubiquinol-cytochrome c reductase binding protein [Source:HGNC Symbol;Acc:HGNC:12582]	protein_coding	4509.1	0.510966	0.157068	0.406275	0.174666	3.25315	0.00114133	0.0406916	3187.45	2985.11	4966.65	3738	5373.36	4939.19	5586.77	5296.3
LSM3	ENSG00000170860	27258	LSM3 homolog, U6 small nuclear RNA and mRNA degradation associated [Source:HGNC Symbol;Acc:HGNC:17874]	protein_coding	1509.58	0.513404	0.159259	0.405266	0.177759	3.2237	0.00126547	0.0431223	996.373	1112.46	1601.39	1264.67	1937.56	1717.34	1700.62	1746.24
SEM1	ENSG00000127922	7979	SEM1 26S proteasome complex subunit [Source:HGNC Symbol;Acc:HGNC:10845]	protein_coding	1924.02	0.471092	0.127723	0.401111	0.136715	3.68838	0.000225687	0.0136684	1376.51	1643.87	1778.94	1655.92	2582.53	1915.38	2247.96	2191.04
FAU	ENSG00000149806	2197	FAU ubiquitin like and ribosomal protein S30 fusion [Source:HGNC Symbol;Acc:HGNC:3597]	protein_coding	7778.21	0.465292	0.123442	0.399472	0.131598	3.76931	0.000163702	0.0106331	5606.37	5703.91	7541.64	7279.97	9974.91	9068.49	8862.21	8188.22
SNRPE	ENSG00000182004	6635	small nuclear ribonucleoprotein polypeptide E [Source:HGNC Symbol;Acc:HGNC:11161]	protein_coding	3443.38	0.500415	0.151033	0.398447	0.16693	3.31328	0.000922077	0.0364339	2417.74	2408.91	3697.13	2885.28	4502.73	3804.15	3852.55	3978.56
GNB4	ENSG00000114450	59345	G protein subunit beta 4 [Source:HGNC Symbol;Acc:HGNC:20731]	protein_coding	660.176	0.489449	0.147327	0.395715	0.161985	3.32219	0.000893129	0.0354923	668.184	516.886	461.852	550.756	797.191	753.737	754.762	778.037
RPL21	ENSG00000122026	6144	ribosomal protein L21 [Source:HGNC Symbol;Acc:HGNC:10313]	protein_coding	11146.1	0.481188	0.140238	0.394364	0.152837	3.43123	0.000600849	0.0273234	7524.74	8330.7	11954.8	9403.85	13664.4	13632.3	11793.9	12864
PIN4	ENSG00000102309	5303	peptidylprolyl cis/trans isomerase, NIMA-interacting 4 [Source:HGNC Symbol;Acc:HGNC:8992]	protein_coding	986.788	0.434962	0.096878	0.394043	0.100664	4.48979	7.12941e-06	0.00128413	773.252	864.302	849.436	871.388	1171.08	1064.1	1197.44	1103.31
ATP5MC3	ENSG00000154518	518	ATP synthase membrane subunit c locus 3 [Source:HGNC Symbol;Acc:HGNC:843]	protein_coding	3204.14	0.488925	0.148543	0.392472	0.163823	3.29147	0.000996654	0.0376084	2273.71	2250.33	3438.36	2701.42	4074.09	3756.86	3441.56	3696.76
EEF1B2	ENSG00000114942	1933	eukaryotic translation elongation factor 1 beta 2 [Source:HGNC Symbol;Acc:HGNC:3208]	protein_coding	7961.34	0.435274	0.109632	0.382277	0.115511	3.97032	7.17751e-05	0.00592529	6034.91	6435.05	7660.01	6942.29	10314.1	9387.72	7919.24	8997.41
RPL7	ENSG00000147604	6129	ribosomal protein L7 [Source:HGNC Symbol;Acc:HGNC:10363]	protein_coding	26326.2	0.472874	0.141307	0.382231	0.154726	3.34643	0.000818584	0.0336883	18338.5	19294.3	28330.8	22236.8	34944.2	28857.8	28271.9	30335.1
RPL10A	ENSG00000198755	4736	ribosomal protein L10a [Source:HGNC Symbol;Acc:HGNC:10299]	protein_coding	13321.7	0.473072	0.143592	0.381746	0.157685	3.29456	0.000985743	0.0376084	8811.53	10036.3	14197.9	11581.3	17435.4	14808.7	14775.5	14927.2
THAP12	ENSG00000137492	5612	THAP domain containing 12 [Source:HGNC Symbol;Acc:HGNC:9440]	protein_coding	969.332	0.481441	0.149856	0.381239	0.166201	3.21269	0.001315	0.0440687	805.126	647.621	956.195	822.684	1022.86	1271.01	1113.9	1115.26
RPS20	ENSG00000008988	6224	ribosomal protein S20 [Source:HGNC Symbol;Acc:HGNC:10405]	protein_coding	11088.3	0.466395	0.139761	0.380156	0.152691	3.33709	0.000846614	0.0345344	7457.45	8244.76	11757.5	9784.55	14186.5	12455.9	12541.9	12278
RPS14	ENSG00000164587	6208	ribosomal protein S14 [Source:HGNC Symbol;Acc:HGNC:10387]	protein_coding	20589.8	0.450817	0.128161	0.379162	0.137939	3.5176	0.000435474	0.0219437	14611.5	15314.1	20508.3	19157.5	27227.4	22762.9	23347.7	21789.4
HSBP1	ENSG00000230989	3281	heat shock factor binding protein 1 [Source:HGNC Symbol;Acc:HGNC:5203]	protein_coding	1828.04	0.434195	0.111289	0.378805	0.117453	3.9015	9.55989e-05	0.0075333	1481.57	1386.03	1751.09	1605.59	2235.34	1879.91	2233.56	2051.22
RPL32	ENSG00000144713	6161	ribosomal protein L32 [Source:HGNC Symbol;Acc:HGNC:10336]	protein_coding	20248.4	0.440773	0.12846	0.375961	0.1384	3.43122	0.000600883	0.0273234	14408.5	14932.8	20820.5	18552	25989.5	22408.2	23126.8	21749.2
HINT1	ENSG00000169567	3094	histidine triad nucleotide binding protein 1 [Source:HGNC Symbol;Acc:HGNC:4912]	protein_coding	3349.81	0.46134	0.144946	0.364985	0.16021	3.18285	0.00145834	0.0470365	2219.41	2602.59	3600.82	2852.81	4080.76	3718.44	3876.56	3847.08
EDF1	ENSG00000107223	8721	endothelial differentiation related factor 1 [Source:HGNC Symbol;Acc:HGNC:3164]	protein_coding	1840.55	0.454302	0.141114	0.362402	0.155223	3.21939	0.00128466	0.0436688	1312.76	1353.35	1821.88	1715.58	2127.18	2379.44	2071.27	1942.92
RPS16	ENSG00000105193	6217	ribosomal protein S16 [Source:HGNC Symbol;Acc:HGNC:10396]	protein_coding	15669.6	0.457888	0.144601	0.361351	0.159916	3.16656	0.00154255	0.0488439	10460.7	11588.2	15781.9	14981.2	19953.8	16910.3	19584.4	16096.4
FAM229B	ENSG00000203778	619208	family with sequence similarity 229 member B [Source:HGNC Symbol;Acc:HGNC:33858]	protein_coding	534.845	0.451361	0.141881	0.357796	0.156157	3.18126	0.00146636	0.0470472	417.91	445.466	482.739	465.525	604.904	537.961	718.272	605.985
RPS24	ENSG00000138326	6229	ribosomal protein S24 [Source:HGNC Symbol;Acc:HGNC:10411]	protein_coding	20692.9	0.40487	0.101287	0.357155	0.106184	3.99724	6.40855e-05	0.00548643	16029.3	15783.8	21174.4	18242.3	24357.7	23726.5	23097.1	23132.1
MRPS21	ENSG00000266472	54460	mitochondrial ribosomal protein S21 [Source:HGNC Symbol;Acc:HGNC:14046]	protein_coding	1388.59	0.442121	0.135541	0.356268	0.148109	3.26191	0.00110666	0.0399496	968.04	1125.77	1317.09	1290.64	1711.89	1735.07	1487.44	1472.76
UROD	ENSG00000126088	7389	uroporphyrinogen decarboxylase [Source:HGNC Symbol;Acc:HGNC:12591]	protein_coding	947.923	0.439391	0.134097	0.355311	0.146125	3.27665	0.00105045	0.0388498	684.712	800.145	909.778	826.743	1227.17	972.468	1095.65	1066.72
NDUFA4	ENSG00000189043	4697	NDUFA4 mitochondrial complex associated [Source:HGNC Symbol;Acc:HGNC:7687]	protein_coding	2594.08	0.441233	0.13789	0.351768	0.151293	3.19989	0.00137479	0.0452167	1975.04	1875.07	2717.73	2235.09	3371.71	2784.39	2848.12	2945.53
RPL38	ENSG00000172809	6169	ribosomal protein L38 [Source:HGNC Symbol;Acc:HGNC:10349]	protein_coding	14044.4	0.428343	0.128778	0.350771	0.139546	3.32622	0.00088032	0.0352866	10543.4	9853.52	14723.5	12776.2	17229.7	15606.8	16424.2	15198.2
COX7C	ENSG00000127184	1350	cytochrome c oxidase subunit 7C [Source:HGNC Symbol;Acc:HGNC:2292]	protein_coding	6290	0.425595	0.128587	0.347352	0.139371	3.30977	0.000933722	0.0365105	4748.12	4635.03	6642.31	5450.74	8049.36	6839.79	6836.07	7118.6
USP37	ENSG00000135913	57695	ubiquitin specific peptidase 37 [Source:HGNC Symbol;Acc:HGNC:20063]	protein_coding	780.989	0.424868	0.1324	0.340528	0.144474	3.20896	0.00133215	0.0442	645.754	731.146	611.547	677.791	1030.87	877.882	785.49	887.426
RPS3A	ENSG00000145425	6189	ribosomal protein S3A [Source:HGNC Symbol;Acc:HGNC:10421]	protein_coding	27784.6	0.397377	0.111217	0.333859	0.118136	3.57298	0.000352936	0.0186827	20836.5	21773.4	28980.6	24333.5	33268.4	32774.3	29091.9	31218.5
RPL35	ENSG00000136942	11224	ribosomal protein L35 [Source:HGNC Symbol;Acc:HGNC:10344]	protein_coding	14631.3	0.410062	0.127635	0.328809	0.138641	3.21276	0.00131467	0.0440687	10347.4	11061.6	14652.8	14194.7	17580.9	16922.1	17376.8	14914.2
SH3BGRL	ENSG00000131171	6451	SH3 domain binding glutamate rich protein like [Source:HGNC Symbol;Acc:HGNC:10823]	protein_coding	1000.34	0.38084	0.104817	0.326528	0.110733	3.63339	0.00027972	0.0161548	807.487	831.618	906.297	919.28	1147.05	1244.4	1069.73	1076.86
					1245.91
					MEDIAN

## Sheet: tDEGs down
hgnc_symbol	ensembl	entrez	description	gene_biotype	baseMean	log2FoldChange	lfcSE	LFC_Shrunken	lfcSE_Shrunken	stat	pvalue	padj	L15.T1	L15.T2	L15.T3	L15.T4	L15m.T1	L15m.T2	L15m.T3	L15m.T4
SF3B2	ENSG00000087365	10992	splicing factor 3b subunit 2 [Source:HGNC Symbol;Acc:HGNC:10769]	protein_coding	3828.44	-0.322901	0.0587787	-0.30504	0.0597804	-5.4935	3.94042e-08	3.0361e-05	4369.17	4222.25	4133.46	4297.28	3220.81	3422.85	3520.3	3441.4
MARS1	ENSG00000166986	4141	methionyl-tRNA synthetase 1 [Source:HGNC Symbol;Acc:HGNC:6898]	protein_coding	2587.71	-0.387862	0.100269	-0.339316	0.105143	-3.8682	0.000109641	0.00808837	2727.04	3164.26	2887.15	2968.89	2193.95	1974.5	2526.44	2259.49
RPA2	ENSG00000117748	6118	replication protein A2 [Source:HGNC Symbol;Acc:HGNC:10290]	protein_coding	1850.39	-0.509984	0.13166	-0.44013	0.140557	-3.8735	0.000107284	0.0080353	1900.66	2655.85	1919.35	2216.42	1487.56	1628.66	1451.91	1542.67
FOXRED2	ENSG00000100350	80020	FAD dependent oxidoreductase domain containing 2 [Source:HGNC Symbol;Acc:HGNC:26264]	protein_coding	1564.04	-0.428593	0.104206	-0.379515	0.109246	-4.11294	3.90649e-05	0.00389778	1736.57	1894.44	1731.36	1815.02	1143.04	1392.2	1451.91	1347.8
AFF4	ENSG00000072364	27125	AF4/FMR2 family member 4 [Source:HGNC Symbol;Acc:HGNC:17869]	protein_coding	1541.7	-0.392974	0.114668	-0.331365	0.122387	-3.42704	0.000610193	0.0275293	1899.48	1643.87	1680.3	1777.27	1528.95	1297.61	1164.79	1341.28
HECTD1	ENSG00000092148	25831	HECT domain E3 ubiquitin protein ligase 1 [Source:HGNC Symbol;Acc:HGNC:20157]	protein_coding	1513.86	-0.389162	0.107913	-0.331705	0.114241	-3.60625	0.000310655	0.0174432	1921.91	1712.87	1485.35	1749.68	1394.08	1250.32	1282.9	1313.75
BMS1	ENSG00000165733	9790	BMS1 ribosome biogenesis factor [Source:HGNC Symbol;Acc:HGNC:23505]	protein_coding	1508.83	-0.518782	0.122426	-0.460226	0.128925	-4.2375	2.26026e-05	0.00284977	1738.93	2032.44	1542.21	1804.06	1339.33	1078.88	1274.26	1260.51
MDN1	ENSG00000112159	23195	midasin AAA ATPase 1 [Source:HGNC Symbol;Acc:HGNC:18302]	protein_coding	1474.65	-0.372751	0.0898731	-0.333117	0.0935004	-4.14753	3.36082e-05	0.00353116	1763.72	1596.66	1604.88	1680.27	1257.88	1404.02	1189.76	1299.99
FADS1	ENSG00000149485	3992	fatty acid desaturase 1 [Source:HGNC Symbol;Acc:HGNC:3574]	protein_coding	1430.49	-0.327556	0.0777755	-0.295633	0.0801871	-4.21155	2.5362e-05	0.00305865	1540.6	1624.5	1609.52	1595.04	1340.67	1250.32	1200.32	1282.96
RSF1	ENSG00000048649	51773	remodeling and spacing factor 1 [Source:HGNC Symbol;Acc:HGNC:18118]	protein_coding	1150.64	-0.638675	0.202422	-0.485434	0.234933	-3.15516	0.0016041	0.049887	1447.34	1544.61	1139.54	1462.32	781.167	1253.27	689.464	887.426
TOR1AIP2	ENSG00000169905	163590	torsin 1A interacting protein 2 [Source:HGNC Symbol;Acc:HGNC:24055]	protein_coding	1140.93	-0.846363	0.119834	-0.812203	0.122301	-7.06281	1.63173e-12	6.38566e-09	1585.46	1486.5	1311.29	1476.12	801.197	895.617	707.709	863.519
NBPF1	ENSG00000219481	55672	NBPF member 1 [Source:HGNC Symbol;Acc:HGNC:26088]	protein_coding	1139.75	-0.379008	0.109991	-0.318927	0.116826	-3.44579	0.000569387	0.0264994	1406.02	1306.14	1138.38	1310.94	989.479	904.484	1069.73	992.83
KIF1A	ENSG00000130294	547	kinesin family member 1A [Source:HGNC Symbol;Acc:HGNC:888]	protein_coding	1100.02	-0.384196	0.119151	-0.311639	0.128328	-3.22443	0.00126223	0.043118	1254.91	1308.56	1146.51	1265.89	1040.22	1019.76	806.616	957.695
PHACTR4	ENSG00000204138	65979	phosphatase and actin regulator 4 [Source:HGNC Symbol;Acc:HGNC:25793]	protein_coding	1030.33	-0.463907	0.132184	-0.384997	0.142782	-3.50955	0.000448858	0.0220345	1173.45	1020.46	1387.88	1198.92	785.173	851.279	942.012	883.441
CLUH	ENSG00000132361	23277	clustered mitochondria homolog [Source:HGNC Symbol;Acc:HGNC:29094]	protein_coding	1022.06	-0.585205	0.160338	-0.490194	0.174434	-3.64982	0.00026242	0.0153566	1351.72	1126.98	1188.28	1250.06	934.73	594.122	900.721	829.833
ALDH9A1	ENSG00000143149	223	aldehyde dehydrogenase 9 family member A1 [Source:HGNC Symbol;Acc:HGNC:412]	protein_coding	1015.77	-0.831803	0.129382	-0.790931	0.132592	-6.42904	1.28409e-10	1.97878e-07	1481.57	1291.61	1108.21	1319.05	715.736	774.428	662.577	772.966
AP2A2	ENSG00000183020	161	adaptor related protein complex 2 subunit alpha 2 [Source:HGNC Symbol;Acc:HGNC:562]	protein_coding	1009.26	-0.537047	0.158965	-0.434071	0.175741	-3.37839	0.000729127	0.0309243	959.777	1438.08	1167.39	1213.53	699.712	869.014	897.84	828.747
RIC8A	ENSG00000177963	60626	RIC8 guanine nucleotide exchange factor A [Source:HGNC Symbol;Acc:HGNC:29550]	protein_coding	1001.75	-0.901281	0.253483	-0.732883	0.285449	-3.55559	0.000377134	0.0193721	1818.03	827.986	1194.08	1376.69	507.425	815.809	780.689	693.279
NAA25	ENSG00000111300	80018	N-alpha-acetyltransferase 25, NatB auxiliary subunit [Source:HGNC Symbol;Acc:HGNC:25783]	protein_coding	1000.99	-0.6258	0.171799	-0.52033	0.188032	-3.64263	0.000269865	0.0157259	1280.88	1108.82	1234.7	1239.91	611.581	715.311	1016.91	799.77
BUB1B	ENSG00000156970	701	BUB1 mitotic checkpoint serine/threonine kinase B [Source:HGNC Symbol;Acc:HGNC:1149]	protein_coding	958.669	-0.678801	0.125351	-0.631934	0.129533	-5.41519	6.12248e-08	4.04346e-05	1365.88	1095.51	1078.04	1188.77	779.832	656.194	739.398	765.721
ACTN1	ENSG00000072110	87	actinin alpha 1 [Source:HGNC Symbol;Acc:HGNC:163]	protein_coding	954.93	-0.457557	0.142198	-0.364171	0.15645	-3.21775	0.00129201	0.0437045	1045.96	1238.35	1014.22	1126.27	691.7	759.649	957.376	805.927
MED14	ENSG00000180182	9282	mediator complex subunit 14 [Source:HGNC Symbol;Acc:HGNC:2370]	protein_coding	952.561	-0.783357	0.187959	-0.684936	0.201537	-4.16771	3.07675e-05	0.00333371	1035.33	1284.35	1269.51	1224.89	484.724	866.058	738.438	717.185
NBPF10	ENSG00000271425	100132406	NBPF member 10 [Source:HGNC Symbol;Acc:HGNC:31992]	protein_coding	942.434	-1.21111	0.278173	-1.07008	0.298284	-4.35379	1.33801e-05	0.00193566	1759	999.878	1129.1	1372.22	683.688	703.488	314.004	578.094
SCAMP2	ENSG00000140497	10066	secretory carrier membrane protein 2 [Source:HGNC Symbol;Acc:HGNC:10564]	protein_coding	920.033	-0.762643	0.170789	-0.681249	0.180698	-4.46541	7.99157e-06	0.00139214	929.083	1337.61	1194.08	1173.35	823.898	605.945	586.717	709.578
TMEM43	ENSG00000170876	79188	transmembrane protein 43 [Source:HGNC Symbol;Acc:HGNC:28472]	protein_coding	890.738	-0.426166	0.106586	-0.375843	0.112058	-3.99833	6.37913e-05	0.00548643	1040.05	1108.82	902.815	1033.73	773.155	759.649	736.517	771.155
HOOK1	ENSG00000134709	51361	hook microtubule tethering protein 1 [Source:HGNC Symbol;Acc:HGNC:19884]	protein_coding	889.021	-0.487465	0.111971	-0.436495	0.117373	-4.35349	1.33984e-05	0.00193566	990.471	1130.61	980.564	1045.5	658.317	801.03	749	756.666
ZDHHC5	ENSG00000156599	25921	zinc finger DHHC-type palmitoyltransferase 5 [Source:HGNC Symbol;Acc:HGNC:18472]	protein_coding	855.855	-0.849881	0.156379	-0.790132	0.162099	-5.43475	5.48731e-08	4.00544e-05	1112.07	1281.93	888.89	1121.81	681.018	591.166	531.022	638.946
ZMYM3	ENSG00000147130	9203	zinc finger MYM-type containing 3 [Source:HGNC Symbol;Acc:HGNC:13054]	protein_coding	844.872	-0.59892	0.128739	-0.542578	0.134684	-4.6522	3.28417e-06	0.000746692	1041.23	1116.09	894.692	1023.99	757.131	608.901	628.008	688.932
DOCK7	ENSG00000116641	85440	dedicator of cytokinesis 7 [Source:HGNC Symbol;Acc:HGNC:19190]	protein_coding	843.139	-0.40801	0.12591	-0.33	0.136307	-3.2405	0.0011932	0.0409616	853.528	1117.3	907.457	972.448	747.784	670.974	746.12	729.5
WDR5	ENSG00000196363	11091	WD repeat domain 5 [Source:HGNC Symbol;Acc:HGNC:12757]	protein_coding	830.52	-0.664905	0.195946	-0.531802	0.220724	-3.3933	0.000690563	0.0300686	1160.47	974.458	879.607	1053.21	450.006	812.854	670.259	643.293
KLHL9	ENSG00000198642	55958	kelch like family member 9 [Source:HGNC Symbol;Acc:HGNC:18732]	protein_coding	826.626	-0.919299	0.202576	-0.820935	0.214887	-4.53805	5.67774e-06	0.00112492	846.445	1193.56	1181.32	1100.29	397.928	688.709	610.723	594.032
SLC18B1	ENSG00000146409	116843	solute carrier family 18 member B1 [Source:HGNC Symbol;Acc:HGNC:21573]	protein_coding	795.181	-0.519539	0.164755	-0.403245	0.185801	-3.15341	0.00161373	0.0499573	879.5	824.355	1086.16	951.749	514.102	768.516	676.021	661.041
OSBP	ENSG00000110048	5007	oxysterol binding protein [Source:HGNC Symbol;Acc:HGNC:8503]	protein_coding	783.773	-0.761406	0.217038	-0.617318	0.243721	-3.50817	0.000451208	0.0220345	1302.13	854.617	751.959	1028.46	492.736	738.958	521.42	579.905
NBPF11	ENSG00000263956	200030	NBPF member 11 [Source:HGNC Symbol;Acc:HGNC:31993]	protein_coding	777.743	-0.598282	0.118162	-0.551305	0.122684	-5.06323	4.12207e-07	0.000173239	1037.69	872.775	888.89	944.849	556.832	662.106	618.405	640.395
KANSL1	ENSG00000120071	284058	KAT8 regulatory NSL complex subunit 1 [Source:HGNC Symbol;Acc:HGNC:24565]	protein_coding	764.712	-0.913596	0.194861	-0.823931	0.205617	-4.68846	2.75265e-06	0.000647059	1257.27	767.461	951.553	1015.88	562.173	594.122	418.672	550.566
BRI3BP	ENSG00000184992	140707	BRI3 binding protein [Source:HGNC Symbol;Acc:HGNC:14251]	protein_coding	748.051	-0.482856	0.139189	-0.399068	0.151273	-3.46908	0.000522248	0.0247204	966.86	910.301	720.628	888.84	671.67	632.548	563.671	629.891
MPP2	ENSG00000108852	4355	membrane palmitoylated protein 2 [Source:HGNC Symbol;Acc:HGNC:7220]	protein_coding	734.191	-0.971742	0.300635	-0.738236	0.357745	-3.2323	0.00122797	0.0420511	789.779	1514.34	545.403	1041.85	425.97	455.198	620.326	480.659
GRIPAP1	ENSG00000068400	56850	GRIP1 associated protein 1 [Source:HGNC Symbol;Acc:HGNC:18706]	protein_coding	725.576	-0.805556	0.230675	-0.650171	0.260272	-3.49217	0.000479114	0.0231527	997.554	1140.3	583.697	966.36	554.161	614.813	422.513	525.211
BRD3	ENSG00000169925	8019	bromodomain containing 3 [Source:HGNC Symbol;Acc:HGNC:1104]	protein_coding	693.335	-0.394036	0.113088	-0.331244	0.120447	-3.48433	0.000493368	0.0236766	838.181	703.304	815.783	793.056	624.934	591.166	568.472	611.78
TEX10	ENSG00000136891	54881	testis expressed 10 [Source:HGNC Symbol;Acc:HGNC:25988]	protein_coding	671.687	-0.715574	0.194892	-0.595871	0.21491	-3.67165	0.00024099	0.0143577	750.822	765.04	966.639	847.848	423.299	679.841	420.593	519.416
CPVL	ENSG00000106066	54504	carboxypeptidase vitellogenic like [Source:HGNC Symbol;Acc:HGNC:14399]	protein_coding	666.973	-0.362076	0.110126	-0.298667	0.117239	-3.28784	0.0010096	0.0378437	780.335	676.673	796.056	750.441	599.563	564.564	572.313	595.843
DNAJC13	ENSG00000138246	23317	DnaJ heat shock protein family (Hsp40) member C13 [Source:HGNC Symbol;Acc:HGNC:30343]	protein_coding	663.615	-0.852642	0.259074	-0.659792	0.30145	-3.29112	0.000997901	0.0376084	792.14	926.037	803.018	900.204	308.461	384.258	722.113	472.69
APEX2	ENSG00000169188	27301	apurinic/apyrimidinic endodeoxyribonuclease 2 [Source:HGNC Symbol;Acc:HGNC:17889]	protein_coding	663.039	-1.21208	0.172024	-1.15966	0.175623	-7.04597	1.84171e-12	6.38566e-09	860.612	1011.98	898.174	937.544	293.772	404.949	459.003	438.28
SNX27	ENSG00000143376	81609	sorting nexin 27 [Source:HGNC Symbol;Acc:HGNC:20073]	protein_coding	657.253	-0.812862	0.224149	-0.670073	0.249162	-3.62644	0.000287354	0.0163333	1058.94	834.039	579.055	879.505	375.227	475.889	576.154	479.21
RAB8A	ENSG00000167461	4218	RAB8A, member RAS oncogene family [Source:HGNC Symbol;Acc:HGNC:7007]	protein_coding	656.054	-0.798988	0.234764	-0.635818	0.267063	-3.40336	0.000665625	0.0293998	762.627	1019.25	691.617	865.706	403.269	354.7	673.14	478.123
ZDHHC7	ENSG00000153786	55625	zinc finger DHHC-type palmitoyltransferase 7 [Source:HGNC Symbol;Acc:HGNC:18459]	protein_coding	628.451	-0.816867	0.238518	-0.651072	0.271529	-3.42476	0.000615335	0.0275293	651.657	861.881	866.842	824.308	604.904	472.933	286.157	458.926
WDR77	ENSG00000116455	79084	WD repeat domain 77 [Source:HGNC Symbol;Acc:HGNC:29652]	protein_coding	626.9	-0.854871	0.187257	-0.766234	0.198174	-4.56524	4.98932e-06	0.00104844	875.959	746.882	790.254	813.755	540.808	467.021	316.885	463.635
MOGS	ENSG00000115275	7841	mannosyl-oligosaccharide glucosidase [Source:HGNC Symbol;Acc:HGNC:24862]	protein_coding	620.913	-1.00592	0.309687	-0.772961	0.366758	-3.24819	0.00116143	0.0408379	833.459	1168.14	424.718	890.869	313.802	390.17	547.346	398.798
NCS1	ENSG00000107130	23413	neuronal calcium sensor 1 [Source:HGNC Symbol;Acc:HGNC:3953]	protein_coding	615.223	-1.15406	0.275594	-1.00465	0.297762	-4.18753	2.82013e-05	0.00328675	800.404	1191.14	505.948	893.71	321.814	493.624	326.487	388.656
TMEM65	ENSG00000164983	157378	transmembrane protein 65 [Source:HGNC Symbol;Acc:HGNC:25203]	protein_coding	609.484	-0.655394	0.164053	-0.567053	0.176177	-3.99502	6.46881e-05	0.00550221	842.904	738.409	642.879	758.558	379.233	490.668	539.664	483.556
SUPV3L1	ENSG00000156502	6832	Suv3 like RNA helicase [Source:HGNC Symbol;Acc:HGNC:11471]	protein_coding	573.577	-0.464643	0.14323	-0.37075	0.157315	-3.24403	0.00117853	0.0408379	646.934	665.778	684.654	672.921	467.365	393.126	565.591	492.249
FKBP9	ENSG00000122642	11328	FKBP prolyl isomerase 9 [Source:HGNC Symbol;Acc:HGNC:3725]	protein_coding	558.999	-0.644995	0.198618	-0.501016	0.227416	-3.24742	0.00116457	0.0408379	728.391	798.934	490.862	704.984	369.886	514.315	429.235	435.382
CLDN12	ENSG00000157224	9069	claudin 12 [Source:HGNC Symbol;Acc:HGNC:2034]	protein_coding	535.662	-0.694075	0.206328	-0.550618	0.23411	-3.36394	0.000768388	0.0320987	782.696	470.887	713.665	675.762	379.233	493.624	354.335	415.098
ANKRD28	ENSG00000206560	23243	ankyrin repeat domain 28 [Source:HGNC Symbol;Acc:HGNC:29024]	protein_coding	530.925	-1.18523	0.151922	-1.14546	0.154588	-7.8016	6.11278e-15	8.47781e-11	818.112	691.199	696.259	741.106	295.108	366.523	282.316	356.781
BCAS3	ENSG00000141376	54828	BCAS3 microtubule associated cell migration factor [Source:HGNC Symbol;Acc:HGNC:14347]	protein_coding	528.349	-0.502884	0.15306	-0.401689	0.169583	-3.28553	0.0010179	0.0380324	641.032	698.462	507.108	627.87	448.67	469.977	394.666	439.004
SKI	ENSG00000157933	6497	SKI proto-oncogene [Source:HGNC Symbol;Acc:HGNC:10896]	protein_coding	520.944	-0.617274	0.19562	-0.471291	0.225435	-3.15547	0.00160242	0.049887	736.655	633.095	504.788	650.598	331.162	393.126	507.016	411.113
SUPT20H	ENSG00000102710	55578	SPT20 homolog, SAGA complex component [Source:HGNC Symbol;Acc:HGNC:20596]	protein_coding	509.922	-0.588221	0.118973	-0.540031	0.123512	-4.94415	7.64764e-07	0.000281318	606.796	618.569	623.151	610.012	396.593	363.567	439.798	420.893
NDUFB8	ENSG00000166136	4714	NADH:ubiquinone oxidoreductase subunit B8 [Source:HGNC Symbol;Acc:HGNC:7703]	protein_coding	465.045	-1.20913	0.343904	-0.971241	0.393316	-3.5159	0.000438272	0.0219437	505.27	997.457	403.83	693.62	206.976	215.776	422.513	274.921
TUBGCP6	ENSG00000128159	85378	tubulin gamma complex associated protein 6 [Source:HGNC Symbol;Acc:HGNC:18127]	protein_coding	460.98	-0.748272	0.215185	-0.60455	0.241749	-3.47734	0.000506411	0.0241355	622.143	654.884	437.483	597.836	257.718	351.744	418.672	347.364
SNAI2	ENSG00000019549	6591	snail family transcriptional repressor 2 [Source:HGNC Symbol;Acc:HGNC:11094]	protein_coding	458.055	-0.707646	0.180996	-0.606614	0.195487	-3.90974	9.23943e-05	0.00732238	563.116	545.938	598.782	571.861	437.988	260.113	328.408	358.23
FLCN	ENSG00000154803	201163	folliculin [Source:HGNC Symbol;Acc:HGNC:27310]	protein_coding	454.719	-0.868057	0.209916	-0.754879	0.225971	-4.13526	3.54556e-05	0.00364247	436.799	728.725	587.178	595.401	257.718	363.567	335.13	333.237
RECQL5	ENSG00000108469	9400	RecQ like helicase 5 [Source:HGNC Symbol;Acc:HGNC:9950]	protein_coding	453.778	-0.652079	0.200217	-0.508221	0.228542	-3.25686	0.00112653	0.0403716	597.352	623.411	429.36	571.455	293.772	325.141	434.036	355.695
RNF8	ENSG00000112130	9025	ring finger protein 8 [Source:HGNC Symbol;Acc:HGNC:10071]	protein_coding	448.527	-1.04239	0.187373	-0.972116	0.193604	-5.56317	2.64917e-08	2.29633e-05	541.867	670.621	601.103	612.447	308.461	203.952	336.09	313.678
ASAP1	ENSG00000153317	50807	ArfGAP with SH3 domain, ankyrin repeat and PH domain 1 [Source:HGNC Symbol;Acc:HGNC:2720]	protein_coding	447.887	-0.541522	0.158646	-0.440145	0.174953	-3.41341	0.000641551	0.0285152	579.644	446.677	563.97	532.898	312.467	384.258	390.825	372.356
SDHA	ENSG00000073578	6389	succinate dehydrogenase complex flavoprotein subunit A [Source:HGNC Symbol;Acc:HGNC:10680]	protein_coding	444.894	-0.716923	0.197613	-0.592971	0.217907	-3.62791	0.00028573	0.0163078	509.992	493.887	657.964	558.062	308.461	263.069	419.632	348.088
ZNF512	ENSG00000243943	84450	zinc finger protein 512 [Source:HGNC Symbol;Acc:HGNC:29380]	protein_coding	444.645	-0.546904	0.134895	-0.478209	0.143233	-4.05428	5.02893e-05	0.00461896	569.019	541.096	475.777	530.463	344.515	336.965	389.864	369.459
CTPS2	ENSG00000047230	56474	CTP synthase 2 [Source:HGNC Symbol;Acc:HGNC:2520]	protein_coding	442.045	-0.596468	0.146231	-0.521127	0.155921	-4.07894	4.5241e-05	0.00438774	593.81	524.149	469.975	538.986	369.886	363.567	313.044	362.939
MFN1	ENSG00000171109	55669	mitofusin 1 [Source:HGNC Symbol;Acc:HGNC:18262]	protein_coding	439.913	-0.605804	0.139928	-0.538746	0.147988	-4.32941	1.49512e-05	0.00209452	526.52	574.991	481.579	536.551	340.509	384.258	313.044	361.852
RTL10	ENSG00000215012	79680	retrotransposon Gag like 10 [Source:HGNC Symbol;Acc:HGNC:26112]	protein_coding	417.747	-0.693708	0.213655	-0.537048	0.246587	-3.24686	0.00116686	0.0408379	586.727	513.255	430.52	530.057	368.551	366.523	224.7	321.646
PDP2	ENSG00000172840	57546	pyruvate dehyrogenase phosphatase catalytic subunit 2 [Source:HGNC Symbol;Acc:HGNC:30263]	protein_coding	409.252	-1.26268	0.208333	-1.19083	0.214264	-6.06085	1.35406e-09	1.56495e-06	664.642	443.045	626.633	582.413	283.09	189.173	222.78	262.243
IKZF5	ENSG00000095574	64376	IKAROS family zinc finger 5 [Source:HGNC Symbol;Acc:HGNC:14283]	protein_coding	385.644	-0.795266	0.1959	-0.68871	0.211542	-4.05956	4.91658e-05	0.00457638	515.895	455.15	483.9	495.965	296.443	342.876	202.614	292.307
FAM193B	ENSG00000146067	54540	family with sequence similarity 193 member B [Source:HGNC Symbol;Acc:HGNC:25524]	protein_coding	383.875	-1.36449	0.312749	-1.20477	0.335037	-4.36289	1.28353e-05	0.00189375	670.545	367.994	595.301	579.978	323.15	165.527	142.118	226.384
USPL1	ENSG00000132952	10208	ubiquitin specific peptidase like 1 [Source:HGNC Symbol;Acc:HGNC:20294]	protein_coding	377.693	-1.56304	0.34599	-1.39169	0.369498	-4.51758	6.25504e-06	0.00120488	501.728	476.939	673.05	603.518	271.072	212.82	80.6616	201.753
HLCS	ENSG00000159267	3141	holocarboxylase synthetase [Source:HGNC Symbol;Acc:HGNC:4976]	protein_coding	376.834	-0.643213	0.170934	-0.543747	0.186074	-3.76294	0.000167928	0.0108326	489.923	406.73	475.777	461.466	316.473	325.141	235.263	303.898
VCPIP1	ENSG00000175073	80124	valosin containing protein interacting protein 1 [Source:HGNC Symbol;Acc:HGNC:30897]	protein_coding	373.619	-0.830066	0.223832	-0.691954	0.247641	-3.70843	0.000208552	0.0130289	512.353	533.833	372.498	489.877	301.784	313.318	191.091	274.196
ASB13	ENSG00000196372	79754	ankyrin repeat and SOCS box containing 13 [Source:HGNC Symbol;Acc:HGNC:19765]	protein_coding	369.614	-1.05361	0.310469	-0.831174	0.359209	-3.39359	0.000689823	0.0300686	382.494	757.777	330.723	527.216	308.461	177.35	232.382	240.51
USP12	ENSG00000152484	219333	ubiquitin specific peptidase 12 [Source:HGNC Symbol;Acc:HGNC:20485]	protein_coding	354.082	-0.585161	0.158262	-0.493239	0.171566	-3.69743	0.000217794	0.0134847	432.077	398.257	450.247	424.533	253.712	254.201	328.408	291.22
KIFAP3	ENSG00000075945	22920	kinesin associated protein 3 [Source:HGNC Symbol;Acc:HGNC:17060]	protein_coding	353.966	-0.600172	0.146366	-0.525443	0.15568	-4.10048	4.12296e-05	0.00407439	441.521	453.94	388.744	426.968	267.066	257.157	307.282	289.047
MFHAS1	ENSG00000147324	9258	malignant fibrous histiocytoma amplified sequence 1 [Source:HGNC Symbol;Acc:HGNC:16982]	protein_coding	353.921	-0.854422	0.226004	-0.718958	0.248301	-3.78056	0.000156476	0.0103341	512.353	541.096	299.391	471.613	257.718	236.466	254.468	258.259
RARS2	ENSG00000146282	57038	arginyl-tRNA synthetase 2, mitochondrial [Source:HGNC Symbol;Acc:HGNC:21406]	protein_coding	337.713	-0.977648	0.202053	-0.888576	0.211974	-4.83857	1.30777e-06	0.000399269	352.981	481.782	512.911	448.885	264.395	186.217	212.217	242.321
CARNMT1	ENSG00000156017	138199	carnosine N-methyltransferase 1 [Source:HGNC Symbol;Acc:HGNC:23435]	protein_coding	324.591	-0.773275	0.187562	-0.674402	0.200947	-4.12278	3.74331e-05	0.00376203	348.258	430.94	454.889	409.11	283.09	195.085	224.7	250.652
ATRIP	ENSG00000164053	84126	ATR interacting protein [Source:HGNC Symbol;Acc:HGNC:33499]	protein_coding	319.551	-0.678921	0.200536	-0.541161	0.226732	-3.38554	0.000710395	0.0304089	386.036	409.151	377.14	395.716	268.401	292.627	176.687	250.652
KIF13A	ENSG00000137177	63971	kinesin family member 13A [Source:HGNC Symbol;Acc:HGNC:14566]	protein_coding	313.814	-0.854705	0.253462	-0.673483	0.291036	-3.37212	0.000745923	0.0314444	543.047	267.522	395.707	411.951	202.97	206.908	256.389	226.022
CCND1	ENSG00000110092	595	cyclin D1 [Source:HGNC Symbol;Acc:HGNC:1582]	protein_coding	313.132	-0.725855	0.191601	-0.613032	0.20944	-3.78837	0.000151641	0.0101111	415.549	403.099	349.29	390.034	268.401	257.157	179.568	241.959
UNC119	ENSG00000109103	9094	unc-119 lipid binding chaperone [Source:HGNC Symbol;Acc:HGNC:12565]	protein_coding	299.536	-1.06015	0.30177	-0.855736	0.343632	-3.51311	0.000442898	0.0220345	291.593	612.516	295.91	419.257	150.892	206.908	224.7	194.509
DDX31	ENSG00000125485	64794	DEAD-box helicase 31 [Source:HGNC Symbol;Acc:HGNC:16715]	protein_coding	297.773	-1.50637	0.264641	-1.40761	0.274034	-5.69212	1.25471e-08	1.33858e-05	375.411	578.622	352.771	456.19	105.491	162.571	180.528	170.603
SEMA4F	ENSG00000135622	10505	ssemaphorin 4F [Source:HGNC Symbol;Acc:HGNC:10734]	protein_coding	296.058	-1.25481	0.351626	-1.01444	0.401345	-3.56859	0.000358913	0.0187645	571.38	440.624	199.594	453.349	153.563	242.378	134.436	173.139
BLOC1S5	ENSG00000188428	63915	biogenesis of lysosomal organelles complex 1 subunit 5 [Source:HGNC Symbol;Acc:HGNC:18561]	protein_coding	288.593	-0.79083	0.194559	-0.686026	0.208855	-4.06474	4.80865e-05	0.00453682	338.814	370.415	395.707	366.088	213.653	153.703	251.587	218.778
NSUN3	ENSG00000178694	63899	NOP2/Sun RNA methyltransferase 3 [Source:HGNC Symbol;Acc:HGNC:26208]	protein_coding	274.33	-1.59506	0.425832	-1.32322	0.477221	-3.74576	0.000179851	0.011338	251.454	739.619	215.84	443.608	105.491	112.322	193.012	133.295
MAP2K6	ENSG00000108984	5608	mitogen-activated protein kinase kinase 6 [Source:HGNC Symbol;Acc:HGNC:6846]	protein_coding	265.995	-0.815736	0.181132	-0.729564	0.191705	-4.50355	6.68265e-06	0.00124134	383.675	332.889	298.231	341.737	162.91	206.908	198.773	202.84
MYBL1	ENSG00000185697	4603	MYB proto-oncogene like 1 [Source:HGNC Symbol;Acc:HGNC:7547]	protein_coding	253.973	-0.588904	0.173742	-0.474663	0.192989	-3.38954	0.000700099	0.0301543	327.009	300.206	314.477	285.322	185.611	177.35	220.859	220.951
LINS1	ENSG00000140471	55180	lines homolog 1 [Source:HGNC Symbol;Acc:HGNC:30922]	protein_coding	250.216	-1.10392	0.288301	-0.929747	0.317734	-3.82906	0.000128632	0.00896599	217.219	384.941	417.755	348.23	118.844	147.792	200.694	166.256
CENPL	ENSG00000120334	91687	centromere protein L [Source:HGNC Symbol;Acc:HGNC:17879]	protein_coding	246.265	-0.774706	0.226385	-0.619429	0.255974	-3.42207	0.000621465	0.0277141	276.246	395.836	259.937	315.761	184.275	144.836	207.415	185.816
POLR2J3	ENSG00000168255		RNA polymerase II subunit J3 [Source:HGNC Symbol;Acc:HGNC:33853]	protein_coding	231.297	-0.635435	0.201155	-0.48396	0.232849	-3.15894	0.00158347	0.0497984	324.648	283.258	228.605	287.757	194.958	189.173	156.522	185.454
DNAJB4	ENSG00000162616	11080	DnaJ heat shock protein family (Hsp40) member B4 [Source:HGNC Symbol;Acc:HGNC:14886]	protein_coding	224.264	-0.702651	0.187162	-0.59236	0.204065	-3.75424	0.000173871	0.0110615	305.759	294.153	235.568	279.64	180.269	147.792	173.807	177.123
KANK1	ENSG00000107104	23189	KN motif and ankyrin repeat domains 1 [Source:HGNC Symbol;Acc:HGNC:19309]	protein_coding	218.381	-1.55517	0.466293	-1.19826	0.555303	-3.33518	0.000852442	0.0346083	492.284	291.732	162.46	360.812	116.174	41.3816	178.608	103.593
ZNF830	ENSG00000198783	91603	zinc finger protein 830 [Source:HGNC Symbol;Acc:HGNC:28291]	protein_coding	218.209	-0.839718	0.184532	-0.753105	0.194707	-4.55052	5.35124e-06	0.00110314	306.94	267.522	268.06	281.669	174.928	133.012	146.919	166.619
FAM171B	ENSG00000144369	165215	family with sequence similarity 171 member B [Source:HGNC Symbol;Acc:HGNC:29412]	protein_coding	217.898	-1.16935	0.325467	-0.953539	0.366566	-3.59284	0.000327094	0.0178601	262.079	374.046	258.776	317.791	140.21	65.0283	187.25	138.004
LRRC37A	ENSG00000176681	9884	leucine rich repeat containing 37A [Source:HGNC Symbol;Acc:HGNC:29069]	protein_coding	214.833	-1.58456	0.375283	-1.38424	0.403966	-4.2223	2.4182e-05	0.00294193	389.577	219.102	345.808	340.113	108.162	44.3375	160.363	111.2
MBD5	ENSG00000204406	55777	methyl-CpG binding domain protein 5 [Source:HGNC Symbol;Acc:HGNC:20444]	protein_coding	213.48	-1.42346	0.330103	-1.25119	0.354689	-4.31217	1.61658e-05	0.00221983	292.773	428.519	197.273	326.314	74.7784	118.233	147.88	122.066
ZNF616	ENSG00000204611	90317	zinc finger protein 616 [Source:HGNC Symbol;Acc:HGNC:28062]	protein_coding	199.078	-1.06139	0.218159	-0.965214	0.229	-4.86523	1.14326e-06	0.000390898	302.218	206.997	300.552	268.681	124.186	124.145	126.754	139.09
ZNF100	ENSG00000197020	163227	zinc finger protein 100 [Source:HGNC Symbol;Acc:HGNC:12880]	protein_coding	196.374	-1.01899	0.249745	-0.881842	0.270565	-4.08012	4.50133e-05	0.00438774	317.565	185.207	283.145	264.623	130.862	141.88	110.43	137.279
PRMT9	ENSG00000164169	90826	protein arginine methyltransferase 9 [Source:HGNC Symbol;Acc:HGNC:25099]	protein_coding	195.853	-2.94604	0.443013	-2.80558	0.453379	-6.65	2.93103e-11	5.8072e-08	271.524	363.152	374.819	379.076	12.018	44.3375	70.0988	51.7967
SPATA2	ENSG00000158480	9825	spermatogenesis associated 2 [Source:HGNC Symbol;Acc:HGNC:14681]	protein_coding	192.21	-1.86613	0.47929	-1.57413	0.532404	-3.89353	9.87978e-05	0.00760517	538.325	122.261	217.001	327.937	46.7365	103.454	100.827	81.136
NTN1	ENSG00000065320	9423	netrin 1 [Source:HGNC Symbol;Acc:HGNC:8029]	protein_coding	191.727	-1.78093	0.499081	-1.43571	0.573398	-3.56841	0.000359152	0.0187645	122.776	566.517	177.546	322.661	65.4311	67.9841	128.674	82.2227
TRIM3	ENSG00000110171	10612	tripartite motif containing 3 [Source:HGNC Symbol;Acc:HGNC:10064]	protein_coding	185.553	-1.2215	0.3762	-0.919025	0.456183	-3.24695	0.0011665	0.0408379	330.55	300.206	128.808	275.581	77.4491	162.571	99.8667	109.389
COL5A2	ENSG00000204262	1290	collagen type V alpha 2 chain [Source:HGNC Symbol;Acc:HGNC:2210]	protein_coding	181.677	-1.82258	0.547606	-1.39015	0.664455	-3.32826	0.000873904	0.0352331	522.978	122.261	168.263	317.385	30.7126	121.189	98.9065	71.7185
ABHD3	ENSG00000158201	171586	abhydrolase domain containing 3, phospholipase [Source:HGNC Symbol;Acc:HGNC:18718]	protein_coding	176.632	-1.50398	0.311501	-1.36342	0.3278	-4.82818	1.37787e-06	0.000399269	331.731	273.574	168.263	273.958	69.4371	79.8074	115.231	101.058
GVQW3	ENSG00000179240	100506127	GVQW motif containing 3 [Source:HGNC Symbol;Acc:HGNC:51239]	protein_coding	172.489	-1.76794	0.545017	-1.32273	0.670563	-3.24382	0.00117937	0.0408379	358.883	227.575	178.706	304.803	130.862	11.8233	96.9859	70.2696
ABCB1	ENSG00000085563	5243	ATP binding cassette subfamily B member 1 [Source:HGNC Symbol;Acc:HGNC:40]	protein_coding	164.186	-1.25686	0.398377	-0.914254	0.49959	-3.15495	0.00160526	0.049887	291.593	194.892	186.829	248.794	120.18	135.968	40.3308	94.9002
PUDP	ENSG00000130021	8226	pseudouridine 5'-phosphatase [Source:HGNC Symbol;Acc:HGNC:16818]	protein_coding	163.175	-1.13024	0.286229	-0.962688	0.314423	-3.94872	7.85706e-05	0.00640997	185.344	206.997	272.701	226.066	81.4551	144.836	79.7013	108.302
ZNF605	ENSG00000196458	100289635	zinc finger protein 605 [Source:HGNC Symbol;Acc:HGNC:28068]	protein_coding	160.69	-0.975572	0.250319	-0.828933	0.274181	-3.89731	9.72677e-05	0.00757869	254.996	222.733	158.979	213.89	92.1377	124.145	105.628	113.011
ERBB3	ENSG00000065361	2065	erb-b2 receptor tyrosine kinase 3 [Source:HGNC Symbol;Acc:HGNC:3431]	protein_coding	152.95	-0.756067	0.225801	-0.594745	0.258961	-3.34838	0.00081286	0.0335523	179.442	199.734	193.792	191.161	101.485	144.836	95.0654	118.082
PMEPA1	ENSG00000124225	56937	prostate transmembrane protein, androgen induced 1 [Source:HGNC Symbol;Acc:HGNC:14107]	protein_coding	147.637	-0.929046	0.280749	-0.718445	0.328647	-3.30916	0.000935747	0.0365105	245.552	188.839	140.412	197.249	80.1197	124.145	100.827	103.956
MED7	ENSG00000155868	9443	mediator complex subunit 7 [Source:HGNC Symbol;Acc:HGNC:2378]	protein_coding	144.609	-1.29402	0.3024	-1.13546	0.325002	-4.27915	1.87611e-05	0.00247807	195.969	283.258	134.61	208.614	77.4491	82.7633	85.4629	88.7426
ZNF333	ENSG00000160961	84449	zinc finger protein 333 [Source:HGNC Symbol;Acc:HGNC:15624]	protein_coding	137.231	-1.23397	0.387949	-0.911529	0.477738	-3.18077	0.00146885	0.0470472	270.343	192.471	102.118	204.961	52.0778	91.6308	102.747	81.4983
FNTB	ENSG00000257365	2342	farnesyltransferase, CAAX box, beta [Source:HGNC Symbol;Acc:HGNC:3785]	protein_coding	136.242	-1.63491	0.464994	-1.30532	0.538136	-3.51598	0.000438131	0.0219437	270.343	127.103	199.594	226.877	22.7006	79.8074	97.9462	65.5608
PRKAG2	ENSG00000106617	51422	protein kinase AMP-activated non-catalytic subunit gamma 2 [Source:HGNC Symbol;Acc:HGNC:9386]	protein_coding	127.793	-1.07237	0.266728	-0.921962	0.290078	-4.02047	5.8082e-05	0.00519703	138.123	211.839	167.102	175.333	65.4311	91.6308	84.5026	88.3803
AHDC1	ENSG00000126705	27245	AT-hook DNA binding motif containing 1 [Source:HGNC Symbol;Acc:HGNC:25230]	protein_coding	123.78	-1.66567	0.474714	-1.33161	0.547065	-3.50879	0.000450149	0.0220345	236.107	231.207	83.551	204.961	45.4012	32.5141	98.9065	57.5921
RETREG1	ENSG00000154153	54463	reticulophagy regulator 1 [Source:HGNC Symbol;Acc:HGNC:25964]	protein_coding	118.343	-1.98907	0.318512	-1.88085	0.328502	-6.24487	4.24142e-10	5.34766e-07	182.983	152.524	226.284	191.973	34.7185	65.0283	37.45	55.781
CTTNBP2	ENSG00000077063	83992	cortactin binding protein 2 [Source:HGNC Symbol;Acc:HGNC:15679]	protein_coding	115.556	-1.15472	0.362374	-0.860346	0.439307	-3.18654	0.00143986	0.0468353	219.58	125.893	128.808	167.621	77.4491	38.4258	93.1449	73.5295
RASL11A	ENSG00000122035	387496	RAS like family 11 member A [Source:HGNC Symbol;Acc:HGNC:23802]	protein_coding	103.996	-1.47742	0.467047	-1.08	0.584601	-3.16333	0.00155976	0.0492763	218.399	118.63	111.401	164.78	24.0359	50.2491	91.2244	53.2455
					454.249
					MEDIAN

## Sheet: pDEGs up
hgnc_symbol	ensembl	entrez	description	gene_biotype	baseMean	log2FoldChange	lfcSE	LFC_Shrunken	lfcSE_Shrunken	stat	pvalue	padj	L15.R2	L15.R3	L15.R4	L15m.R1	L15m.R2	L15m.R3	L15m.R4
RPL27A	ENSG00000166441	6157	ribosomal protein L27a [Source:HGNC Symbol;Acc:HGNC:10329]	protein_coding	176773	0.572397	0.139675	0.50391	0.148452	4.09806	4.16626e-05	0.00630715	165368	105040	145376	232338	195428	188760	205099
EEF1A1	ENSG00000156508	1915	eukaryotic translation elongation factor 1 alpha 1 [Source:HGNC Symbol;Acc:HGNC:3189]	protein_coding	88739.5	0.445915	0.121708	0.381974	0.129203	3.66381	0.000248494	0.0191355	70504.2	73433.8	77092.9	121360	93556.9	85088	100141
MT-CO2	ENSG00000198712	4513	mitochondrially encoded cytochrome c oxidase II [Source:HGNC Symbol;Acc:HGNC:7421]	protein_coding	75027.5	0.553958	0.156879	0.461914	0.170638	3.53112	0.000413809	0.0246777	74654	42895.9	60373.6	77440.9	101197	78920.5	89710.7
RPS2	ENSG00000140988	6187	ribosomal protein S2 [Source:HGNC Symbol;Acc:HGNC:10404]	protein_coding	73012.2	0.39842	0.0965486	0.356894	0.100516	4.12663	3.68122e-05	0.00576956	64806.1	55168.1	65797.4	81058.4	82225	81914	80116.2
RACK1	ENSG00000204628	10399	receptor for activated C kinase 1 [Source:HGNC Symbol;Acc:HGNC:4399]	protein_coding	43068.4	0.743459	0.102179	0.714124	0.104596	7.27602	3.43816e-13	4.58032e-09	31515.4	27493.1	34790.5	54452.9	52522.5	49698.1	51006.4
RPL8	ENSG00000161016	6132	ribosomal protein L8 [Source:HGNC Symbol;Acc:HGNC:10368]	protein_coding	41186.2	0.475299	0.114769	0.422621	0.120673	4.14136	3.4526e-05	0.00560921	37602.7	27851	35822	49205.9	45648.7	45923.1	46249.9
RPL7A	ENSG00000148303	6130	ribosomal protein L7a [Source:HGNC Symbol;Acc:HGNC:10364]	protein_coding	33811.5	0.495731	0.103481	0.455729	0.10755	4.79055	1.66329e-06	0.000925004	27626.7	25238.3	29553	41761.3	39760.2	34879.8	37861
RPS3	ENSG00000149273	6188	ribosomal protein S3 [Source:HGNC Symbol;Acc:HGNC:10420]	protein_coding	33429.9	0.625138	0.123149	0.57725	0.128295	5.07626	3.84928e-07	0.000401567	28435.9	20760.6	27649.8	42490.6	40359.1	35338.9	38974.2
RPL10	ENSG00000147403	6134	ribosomal protein L10 [Source:HGNC Symbol;Acc:HGNC:10298]	protein_coding	32690.3	0.825739	0.120186	0.791597	0.123537	6.87052	6.39662e-12	4.26079e-08	23640.8	19387.3	25434.1	41935.7	44248.3	34514.5	39671.5
RPL13A	ENSG00000142541	23521	ribosomal protein L13a [Source:HGNC Symbol;Acc:HGNC:10304]	protein_coding	32242.5	0.615987	0.12369	0.566959	0.129028	4.98008	6.35592e-07	0.00052921	27304.1	20386.7	26728.2	41973.3	38397.4	33446.3	37461.4
RPLP0	ENSG00000089157	6175	ribosomal protein lateral stalk subunit P0 [Source:HGNC Symbol;Acc:HGNC:10371]	protein_coding	30250	0.402901	0.112887	0.345155	0.119098	3.56906	0.000358269	0.0228977	25170.3	25133.6	26479.1	29639.1	39508.9	31707.8	34110.9
RPL13	ENSG00000167526	6137	ribosomal protein L13 [Source:HGNC Symbol;Acc:HGNC:10303]	protein_coding	30130.7	0.462024	0.118871	0.40335	0.125712	3.88679	0.000101581	0.0109134	27186.3	21048.6	26283.8	38109.9	34076.6	30497.7	33712
RPL41	ENSG00000229117	6171	ribosomal protein L41 [Source:HGNC Symbol;Acc:HGNC:10354]	protein_coding	26308.8	0.744192	0.164761	0.670078	0.174448	4.5168	6.27811e-06	0.00223157	22128.4	14893.6	20115.4	39764.8	32179	22991.7	32088.6
RPL29	ENSG00000162244	6159	ribosomal protein L29 [Source:HGNC Symbol;Acc:HGNC:10331]	protein_coding	25598	0.55187	0.119306	0.501501	0.124827	4.62568	3.73379e-06	0.00163724	20989.8	18213.4	21620	30787.6	33421.2	24746.5	29407.5
RPSA	ENSG00000168028	3921	ribosomal protein SA [Source:HGNC Symbol;Acc:HGNC:6502]	protein_coding	24929.1	0.416422	0.123022	0.34819	0.13119	3.38494	0.000711935	0.0338728	21025.6	20183.1	21681.5	27790.4	32999.4	22714.1	28109.7
RPL15	ENSG00000174748	6138	ribosomal protein L15 [Source:HGNC Symbol;Acc:HGNC:10306]	protein_coding	24178.7	0.41259	0.108811	0.373494	0.114244	3.79181	0.000149552	0.0137402	21005.1	18577	21538.8	27766.1	29822.1	23861.9	26679.7
RPL19	ENSG00000108298	6143	ribosomal protein L19 [Source:HGNC Symbol;Acc:HGNC:10312]	protein_coding	24151.4	0.460873	0.11493	0.408436	0.120991	4.01003	6.07116e-05	0.00816719	20892.5	17734.7	21148.3	31480.6	26035.9	24707.7	27060.3
RPL39	ENSG00000198918	6170	ribosomal protein L39 [Source:HGNC Symbol;Acc:HGNC:10350]	protein_coding	22538.6	0.593871	0.153099	0.523273	0.163936	3.87899	0.00010489	0.0111039	18417.3	15925	18141.7	32802.3	27284.7	18556.6	26642.4
RPS11	ENSG00000142534	6205	ribosomal protein S11 [Source:HGNC Symbol;Acc:HGNC:10384]	protein_coding	22528.3	0.666341	0.131354	0.618351	0.136978	5.07287	3.91861e-07	0.000401567	19130.8	13369.1	18304.7	30003.8	26326	24031.3	26532.4
RPL24	ENSG00000114391	6152	ribosomal protein L24 [Source:HGNC Symbol;Acc:HGNC:10325]	protein_coding	22408.7	0.61507	0.1476	0.538607	0.157265	4.16714	3.08449e-05	0.00547887	19352.7	14192.4	18155.2	32650.9	25248.8	20866.5	26394.6
RPS3A	ENSG00000145425	6189	ribosomal protein S3A [Source:HGNC Symbol;Acc:HGNC:10421]	protein_coding	22385.5	0.686002	0.167665	0.597655	0.17987	4.0915	4.2859e-05	0.00641536	16532.7	16108.3	17305	36405.3	24952.1	18238.2	27157
RPL18	ENSG00000063177	6141	ribosomal protein L18 [Source:HGNC Symbol;Acc:HGNC:10310]	protein_coding	21653.1	0.576892	0.136319	0.511211	0.14452	4.23194	2.31683e-05	0.00466715	19740.2	13207.6	17898.4	28459.1	24524.8	22570.3	25171.3
RPL7	ENSG00000147604	6129	ribosomal protein L7 [Source:HGNC Symbol;Acc:HGNC:10363]	protein_coding	21626.5	0.535059	0.164488	0.427067	0.182117	3.25288	0.00114242	0.044114	18548.7	15765	17385.8	33584.9	22833.2	17679.1	25588.6
RPS14	ENSG00000164587	6208	ribosomal protein S14 [Source:HGNC Symbol;Acc:HGNC:10387]	protein_coding	21459.1	0.685606	0.134292	0.640197	0.140036	5.10533	3.30216e-07	0.000399922	17408.4	13338.5	17198.2	28138.1	28136	20565.5	25429.2
RPLP1	ENSG00000137818	6176	ribosomal protein lateral stalk subunit P1 [Source:HGNC Symbol;Acc:HGNC:10372]	protein_coding	21378.6	0.437751	0.109725	0.386659	0.115264	3.98951	6.62089e-05	0.00840034	18335.3	16234.9	18877.4	26009.5	25434.8	21027.7	23730.6
RPS15	ENSG00000115268	6209	ribosomal protein S15 [Source:HGNC Symbol;Acc:HGNC:10388]	protein_coding	20862	0.629411	0.147164	0.562918	0.156037	4.27692	1.89496e-05	0.00409577	18774	12227.1	16799.6	29284.1	23175.3	21291.9	24481.6
RPL23A	ENSG00000198242	6147	ribosomal protein L23a [Source:HGNC Symbol;Acc:HGNC:10317]	protein_coding	19851.7	0.557888	0.146772	0.479504	0.157605	3.80105	0.000144087	0.0134233	17572.3	13107.2	16319.7	28889.2	21337.6	18623.9	23111.7
RPL35	ENSG00000136942	11224	ribosomal protein L35 [Source:HGNC Symbol;Acc:HGNC:10344]	protein_coding	18792.5	0.454481	0.142593	0.367609	0.155686	3.18726	0.00143627	0.0496392	17724.2	12512.2	16379	25418.3	20994.4	17626.1	20893.4
RPS16	ENSG00000105193	6217	ribosomal protein S16 [Source:HGNC Symbol;Acc:HGNC:10396]	protein_coding	18492.9	0.627434	0.130038	0.57933	0.135742	4.82499	1.40007e-06	0.000925004	15776.5	11533.2	15122.6	24808.9	21680.8	19013.6	21514.8
TPT1	ENSG00000133112	7178	tumor protein, translationally-controlled 1 [Source:HGNC Symbol;Acc:HGNC:12022]	protein_coding	17251.6	0.434097	0.12704	0.362172	0.135845	3.417	0.000633163	0.0317105	13553.9	14759.8	14867.6	20208.9	22449.1	15335.6	19586.7
RPL32	ENSG00000144713	6161	ribosomal protein L32 [Source:HGNC Symbol;Acc:HGNC:10336]	protein_coding	16956.7	0.606156	0.139084	0.540892	0.147086	4.3582	1.31134e-05	0.0031763	14390.3	11024	13874.3	23335.7	20518.3	15721.3	19833.2
RPL27	ENSG00000131469	6155	ribosomal protein L27 [Source:HGNC Symbol;Acc:HGNC:10328]	protein_coding	16846.3	0.64235	0.135467	0.584449	0.14211	4.74175	2.11877e-06	0.00108562	14684	10039.2	13670.5	22470.7	19642.6	17639.4	19777.6
RPL37A	ENSG00000197756	6168	ribosomal protein L37a [Source:HGNC Symbol;Acc:HGNC:10348]	protein_coding	16663	0.565668	0.131047	0.502814	0.138347	4.31654	1.58495e-05	0.00364046	14267.4	11125.9	13942.9	22721.5	19145.6	16229.3	19208
RPS23	ENSG00000186468	6228	ribosomal protein S23 [Source:HGNC Symbol;Acc:HGNC:10410]	protein_coding	15946.4	0.744708	0.175664	0.655502	0.18787	4.23938	2.24137e-05	0.00466554	12819.9	9752.58	12036.1	25563.7	19143.4	12708.4	19600.6
SLC25A5	ENSG00000005022	292	solute carrier family 25 member 5 [Source:HGNC Symbol;Acc:HGNC:10991]	protein_coding	15343.3	0.411103	0.0954893	0.371387	0.0992946	4.30523	1.66812e-05	0.00376655	12946.2	12039.4	13835.2	17554.5	17643.3	16595.6	16788.7
RPS19	ENSG00000105372	6223	ribosomal protein S19 [Source:HGNC Symbol;Acc:HGNC:10402]	protein_coding	14808.1	0.517625	0.112004	0.471475	0.117015	4.6215	3.80982e-06	0.00163724	12657.7	10271.9	12807.7	18406.2	17114.1	15731.5	16667.9
RPL9	ENSG00000163682	6133	ribosomal protein L9 [Source:HGNC Symbol;Acc:HGNC:10369]	protein_coding	14770.3	0.59891	0.141964	0.535161	0.150086	4.21873	2.45679e-05	0.00474338	11367.2	10936.7	12024	19946	19179.9	12594.1	17344.4
RPL31	ENSG00000071082	6160	ribosomal protein L31 [Source:HGNC Symbol;Acc:HGNC:10334]	protein_coding	14430.5	0.673373	0.162307	0.592049	0.173421	4.14876	3.3428e-05	0.00560921	11763.2	9365.62	11258.2	22040.6	17243.6	12004.4	17338
RPS5	ENSG00000083845	6193	ribosomal protein S5 [Source:HGNC Symbol;Acc:HGNC:10426]	protein_coding	14270.6	0.72264	0.141033	0.664576	0.147407	5.12392	2.99254e-07	0.000398667	11910	8166.91	11257.3	18929.5	18310.8	14255.1	17064.3
RPS7	ENSG00000171863	6201	ribosomal protein S7 [Source:HGNC Symbol;Acc:HGNC:10440]	protein_coding	13802.8	0.525642	0.140039	0.450289	0.150145	3.75353	0.000174362	0.0149861	11705.2	9887.87	11571.1	19214.2	16159.8	12216.6	15864.4
RPL18A	ENSG00000105640	6142	ribosomal protein L18a [Source:HGNC Symbol;Acc:HGNC:10311]	protein_coding	12868.5	0.705156	0.119822	0.665628	0.123805	5.88501	3.98023e-09	8.83744e-06	10349.8	7766.86	10395.9	16036.5	14294.4	15999.8	15236.1
RPL10A	ENSG00000198755	4736	ribosomal protein L10a [Source:HGNC Symbol;Acc:HGNC:10299]	protein_coding	12778.7	0.518387	0.130944	0.453223	0.139168	3.95884	7.53146e-05	0.0089584	11502	8447.68	10865.5	16946.3	14148.3	12982.9	14558.4
RPS9	ENSG00000170889	6203	ribosomal protein S9 [Source:HGNC Symbol;Acc:HGNC:10442]	protein_coding	12256.1	0.704043	0.11596	0.672999	0.119543	6.07142	1.26782e-09	5.62998e-06	9417.74	7794.5	9959.63	15881.4	15192.2	13122.6	14424.3
RPS12	ENSG00000112306	6206	ribosomal protein S12 [Source:HGNC Symbol;Acc:HGNC:10385]	protein_coding	10953	0.521614	0.135943	0.446263	0.145234	3.837	0.000124547	0.0124753	8760.53	8399.67	9211.8	14098.1	14060.8	9491.52	12648.6
RAN	ENSG00000132341	5901	RAN, member RAS oncogene family [Source:HGNC Symbol;Acc:HGNC:9846]	protein_coding	10503	0.402644	0.114634	0.341027	0.121337	3.51242	0.000444044	0.0253886	9656.73	7638.84	9368.46	12781.2	11554.4	10946.4	11575.1
RPS20	ENSG00000008988	6224	ribosomal protein S20 [Source:HGNC Symbol;Acc:HGNC:10405]	protein_coding	10133.6	0.527883	0.123464	0.470468	0.130075	4.27561	1.90615e-05	0.00409577	8291.09	7378.44	8666.42	13536	11771.4	9806.78	11485.4
RPLP2	ENSG00000177600	6181	ribosomal protein lateral stalk subunit P2 [Source:HGNC Symbol;Acc:HGNC:10377]	protein_coding	10126.2	0.414882	0.0945905	0.376732	0.0982395	4.38609	1.15407e-05	0.0030504	8280.85	8191.64	9107.22	11478.9	11077.3	11604.5	11143.4
RPL37	ENSG00000145592	6167	ribosomal protein L37 [Source:HGNC Symbol;Acc:HGNC:10347]	protein_coding	10055.4	0.708455	0.150022	0.643582	0.15786	4.72233	2.33164e-06	0.00115045	8026.5	6288.84	7900.19	14702.6	12370.3	9069.13	12030.3
RPS25	ENSG00000118181	6230	ribosomal protein S25 [Source:HGNC Symbol;Acc:HGNC:10413]	protein_coding	9833.34	0.581903	0.167289	0.476721	0.183914	3.47844	0.000504345	0.027424	8287.68	6875.1	7855.75	15367.8	10627.8	8115.18	11704.1
RPL28	ENSG00000108107	6158	ribosomal protein L28 [Source:HGNC Symbol;Acc:HGNC:10330]	protein_coding	9173.4	0.487767	0.127305	0.4229	0.135249	3.83149	0.000127369	0.0125108	8506.18	6102.64	7818.5	10377.6	9495.29	11418.8	10494.7
RPL30	ENSG00000156482	6156	ribosomal protein L30 [Source:HGNC Symbol;Acc:HGNC:10333]	protein_coding	8988.43	0.835023	0.158832	0.768319	0.166105	5.25728	1.46203e-07	0.000216412	6838.4	5103.23	6768.13	13361.5	11767	8010.1	11070.7
RPS13	ENSG00000110700	6207	ribosomal protein S13 [Source:HGNC Symbol;Acc:HGNC:10386]	protein_coding	8625.8	0.553047	0.133991	0.490442	0.142158	4.1275	3.66724e-05	0.00576956	7669.73	5574.57	7235.41	11287.5	10096.4	8572.26	9944.75
UBA52	ENSG00000221983	7311	ubiquitin A-52 residue ribosomal protein fusion product 1 [Source:HGNC Symbol;Acc:HGNC:12458]	protein_coding	8459.86	0.517699	0.124754	0.455611	0.131859	4.14977	3.32814e-05	0.00560921	7657.78	5529.47	7220.6	10371.6	9734.42	9101.78	9603.37
EEF1B2	ENSG00000114942	1933	eukaryotic translation elongation factor 1 beta 2 [Source:HGNC Symbol;Acc:HGNC:3208]	protein_coding	8327.04	0.463646	0.139496	0.382114	0.151079	3.32371	0.000888274	0.0381729	7411.97	6047.36	7111.07	11040.3	9867.27	7330.6	9480.73
RPL35A	ENSG00000182899	6165	ribosomal protein L35a [Source:HGNC Symbol;Acc:HGNC:10345]	protein_coding	7768.37	0.517336	0.14348	0.437301	0.154726	3.60562	0.000311407	0.0215996	6951.07	5253.07	6530.23	10954.3	8317.38	7468.34	8904.19
SLC25A3	ENSG00000075415	5250	solute carrier family 25 member 3 [Source:HGNC Symbol;Acc:HGNC:10989]	protein_coding	7423.16	0.494315	0.108839	0.447115	0.1137	4.5417	5.58025e-06	0.002124	6389.45	5238.52	6476.36	8565.24	8681.6	8271.28	8339.66
RPS28	ENSG00000233927	6234	ribosomal protein S28 [Source:HGNC Symbol;Acc:HGNC:10418]	protein_coding	7386.83	0.672719	0.141546	0.61261	0.148634	4.75265	2.00765e-06	0.00106983	6534.55	4137.28	5933.67	9229.13	8237.67	8850.79	8784.71
SLC25A6	ENSG00000169100	293	solute carrier family 25 member 6 [Source:HGNC Symbol;Acc:HGNC:10992]	protein_coding	6644.22	0.435938	0.122768	0.3729	0.130462	3.55091	0.000383906	0.0235686	5629.82	5289.44	5702.05	6159.22	7600	8510.03	7618.98
ATP5MC2	ENSG00000135390	517	ATP synthase membrane subunit c locus 2 [Source:HGNC Symbol;Acc:HGNC:842]	protein_coding	6172.96	0.44528	0.121704	0.381855	0.129393	3.65872	0.000253474	0.0194068	5602.51	4345.31	5433.63	7702.66	6682.24	6569.48	6874.91
PHB	ENSG00000167085	5245	prohibitin [Source:HGNC Symbol;Acc:HGNC:8912]	protein_coding	6150.38	0.515493	0.121973	0.464002	0.128354	4.2263	2.37561e-05	0.00466715	5522.27	4070.36	5262.16	6781.92	7212.53	7202.05	7001.34
SRSF3	ENSG00000112081	6428	serine and arginine rich splicing factor 3 [Source:HGNC Symbol;Acc:HGNC:10785]	protein_coding	5864.48	0.39109	0.1083	0.338704	0.113887	3.61118	0.000304805	0.0212598	5073.32	4643.53	5248.69	5993.24	7128.39	6478.68	6485.49
CDKN2A	ENSG00000147889	1029	cyclin dependent kinase inhibitor 2A [Source:HGNC Symbol;Acc:HGNC:1787]	protein_coding	5680.04	0.539324	0.148373	0.449064	0.160666	3.63493	0.000278056	0.0201262	5407.9	3437.55	4717.22	7420.38	6308.05	5905.29	6563.88
TXN	ENSG00000136810	7295	thioredoxin [Source:HGNC Symbol;Acc:HGNC:12435]	protein_coding	5496.89	0.520656	0.163298	0.408994	0.181259	3.18838	0.00143075	0.0496392	4962.37	3767.78	4497.72	8049.14	6165.24	4637.1	6398.88
STOML2	ENSG00000165283	30968	stomatin like 2 [Source:HGNC Symbol;Acc:HGNC:14559]	protein_coding	5430.01	0.452518	0.135238	0.373452	0.145894	3.34609	0.000819599	0.0366399	5285	3517.56	4680.86	6348.21	6129.82	5903.25	6145.38
RPS21	ENSG00000171858	6227	ribosomal protein S21 [Source:HGNC Symbol;Acc:HGNC:10409]	protein_coding	5255.24	0.766224	0.163578	0.691649	0.172616	4.68416	2.8111e-06	0.00133748	4477.57	2785.83	4039.42	7638.45	6236.09	5192.13	6417.21
PRELID1	ENSG00000169230	27166	PRELI domain containing 1 [Source:HGNC Symbol;Acc:HGNC:30255]	protein_coding	5014.93	0.509894	0.151245	0.412696	0.165379	3.37131	0.000748109	0.0348472	4836.04	3110.24	4187.55	6579.6	5649.35	4955.42	5786.3
RPS29	ENSG00000213741	6235	ribosomal protein S29 [Source:HGNC Symbol;Acc:HGNC:10419]	protein_coding	4919.22	0.990839	0.167661	0.933636	0.173941	5.90977	3.42589e-09	8.83744e-06	3414.08	2577.8	3499.43	7522.14	6806.23	4394.28	6220.6
PCNA	ENSG00000132646	5111	proliferating cell nuclear antigen [Source:HGNC Symbol;Acc:HGNC:8729]	protein_coding	4884.1	0.395428	0.111113	0.347798	0.11689	3.55881	0.000372541	0.0232161	4071.29	4028.18	4340.17	4868.98	5991.43	5443.11	5445.56
BCAP31	ENSG00000185825	10134	B cell receptor associated protein 31 [Source:HGNC Symbol;Acc:HGNC:16695]	protein_coding	4821.97	0.424973	0.109088	0.37679	0.114535	3.89571	9.79133e-05	0.0108189	4163.47	3661.58	4298.87	5271.19	5795.48	5233.96	5329.24
ATP5MC3	ENSG00000154518	518	ATP synthase membrane subunit c locus 3 [Source:HGNC Symbol;Acc:HGNC:843]	protein_coding	4714.82	0.454755	0.142388	0.365496	0.155384	3.19377	0.00140429	0.0494918	4532.19	3037.5	4126.05	5899.96	5353.76	4816.67	5237.57
EEF1D	ENSG00000104529	1936	eukaryotic translation elongation factor 1 delta [Source:HGNC Symbol;Acc:HGNC:3211]	protein_coding	4472.24	0.386434	0.103368	0.341287	0.108275	3.73844	0.000185164	0.0158125	3723.05	3651.4	4060.52	5183.97	4823.48	4986.03	4877.23
SERF2	ENSG00000140264	10169	small EDRK-rich factor 2 [Source:HGNC Symbol;Acc:HGNC:10757]	protein_coding	4334.51	0.522998	0.154421	0.426519	0.168969	3.38683	0.000707046	0.033761	4231.75	2599.62	3595.93	5633.43	4624.21	4615.68	5040.97
PRDX5	ENSG00000126432	25824	peroxiredoxin 5 [Source:HGNC Symbol;Acc:HGNC:9355]	protein_coding	4215.11	0.558691	0.151467	0.471727	0.16375	3.68854	0.000225548	0.0182106	3953.5	2548.71	3475.64	5620.1	4628.64	4372.85	4906.31
MIF	ENSG00000240972	4282	macrophage migration inhibitory factor [Source:HGNC Symbol;Acc:HGNC:7097]	protein_coding	3863.39	0.502681	0.138827	0.426369	0.149251	3.62092	0.000293561	0.0208022	3671.84	2429.42	3280.38	4453.44	4392.83	4404.48	4411.32
SSR4	ENSG00000180879	6748	signal sequence receptor subunit 4 [Source:HGNC Symbol;Acc:HGNC:11326]	protein_coding	3789.27	0.631584	0.165349	0.538581	0.178983	3.81971	0.000133609	0.0127199	3487.48	2166.11	3020.48	5159.74	4613.14	3569.91	4508.04
COX6B1	ENSG00000126267	1340	cytochrome c oxidase subunit 6B1 [Source:HGNC Symbol;Acc:HGNC:2280]	protein_coding	3746.35	0.503683	0.15807	0.402147	0.174498	3.18646	0.00144027	0.0496392	3656.48	2317.4	3114.74	5045.86	3772.88	3984.13	4332.93
EIF3L	ENSG00000100129	51386	eukaryotic translation initiation factor 3 subunit L [Source:HGNC Symbol;Acc:HGNC:18138]	protein_coding	3703.13	0.437996	0.135132	0.356004	0.145917	3.24125	0.00119007	0.0451603	2623.72	3444.83	3185.66	4604.88	3541.5	4271.85	4249.48
QARS1	ENSG00000172053	5859	glutaminyl-tRNA synthetase 1 [Source:HGNC Symbol;Acc:HGNC:9751]	protein_coding	3693.81	0.459037	0.117214	0.400654	0.123892	3.91623	8.99461e-05	0.0100694	3212.65	2669.45	3267.36	4398.92	4245.59	3958.63	4104.08
PPA1	ENSG00000180817	5464	inorganic pyrophosphatase 1 [Source:HGNC Symbol;Acc:HGNC:9226]	protein_coding	3677.09	0.416222	0.11902	0.351127	0.126578	3.49709	0.000470369	0.0261094	3122.18	2865.84	3291.15	4589.13	4128.24	3698.46	4044.66
GPX1	ENSG00000233276	2876	glutathione peroxidase 1 [Source:HGNC Symbol;Acc:HGNC:4553]	protein_coding	3595.14	0.529379	0.155372	0.431155	0.170141	3.40717	0.000656393	0.0325073	3391.89	2244.66	2987.26	4917.44	3824.91	3628.06	4171.72
EIF3K	ENSG00000178982	27335	eukaryotic translation initiation factor 3 subunit K [Source:HGNC Symbol;Acc:HGNC:24656]	protein_coding	3565.42	0.45958	0.129193	0.389232	0.138282	3.55731	0.000374677	0.0232161	3262.15	2446.87	3118.78	4386.81	3943.36	3809.67	3990.29
PSMA7	ENSG00000101182	5688	proteasome 20S subunit alpha 7 [Source:HGNC Symbol;Acc:HGNC:9536]	protein_coding	3446.06	0.488275	0.147711	0.397059	0.161232	3.3056	0.000947727	0.0396471	3286.05	2212.66	2922.62	4442.54	3850.37	3462.78	3945.41
PRMT1	ENSG00000126457	3276	protein arginine methyltransferase 1 [Source:HGNC Symbol;Acc:HGNC:5187]	protein_coding	3391.27	0.46839	0.115627	0.411305	0.121737	4.05088	5.1025e-05	0.00730919	2601.53	2820.74	2941.92	3439.42	4020.86	4060.65	3853.74
PSMB4	ENSG00000159377	5692	proteasome 20S subunit beta 4 [Source:HGNC Symbol;Acc:HGNC:9541]	protein_coding	3378.72	0.42489	0.124887	0.354975	0.133501	3.4022	0.000668447	0.0326193	3069.26	2446.87	2977.38	3732.6	4154.81	3508.69	3761.44
PRPS1	ENSG00000147224	5631	phosphoribosyl pyrophosphate synthetase 1 [Source:HGNC Symbol;Acc:HGNC:9462]	protein_coding	3329.11	0.435431	0.120355	0.369409	0.127922	3.6179	0.000297003	0.0208246	2633.96	2758.19	2938.33	3782.27	4168.1	3302.6	3720.35
EDF1	ENSG00000107223	8721	endothelial differentiation related factor 1 [Source:HGNC Symbol;Acc:HGNC:3164]	protein_coding	3249.11	0.690415	0.16888	0.601474	0.181336	4.08821	4.34722e-05	0.00643485	2939.52	1750.05	2550.51	4481.3	3896.87	3206.69	3918.85
DAD1	ENSG00000129562	1603	defender against cell death 1 [Source:HGNC Symbol;Acc:HGNC:2664]	protein_coding	3235.4	0.540962	0.1648	0.434828	0.182347	3.28254	0.00102876	0.041784	3129	1944.99	2643.87	4285.04	3820.48	3038.35	3786.1
CYC1	ENSG00000179091	1537	cytochrome c1 [Source:HGNC Symbol;Acc:HGNC:2579]	protein_coding	3141.39	0.493907	0.153876	0.39496	0.169236	3.20978	0.00132837	0.0484836	3070.97	1956.63	2630.4	3776.22	3095.35	3813.75	3646.39
PARK7	ENSG00000116288	11315	Parkinsonism associated deglycase [Source:HGNC Symbol;Acc:HGNC:16369]	protein_coding	3039.41	0.556204	0.145619	0.478644	0.15636	3.81959	0.000133672	0.0127199	2741.51	1920.26	2543.32	3955.52	3529.32	3081.2	3504.78
PSMD4	ENSG00000159352	5710	proteasome 26S subunit, non-ATPase 4 [Source:HGNC Symbol;Acc:HGNC:9561]	protein_coding	3014.96	0.467099	0.11008	0.422113	0.11527	4.24327	2.20289e-05	0.00465823	2376.2	2406.14	2657.79	3287.99	3544.82	3464.82	3366.97
GHITM	ENSG00000165678	27069	growth hormone inducible transmembrane protein [Source:HGNC Symbol;Acc:HGNC:17281]	protein_coding	2881.79	0.522462	0.148267	0.43745	0.160782	3.52378	0.000425437	0.0248582	2674.93	1824.24	2438.74	3722.91	3261.41	2933.26	3317.02
ID2	ENSG00000115738	3398	inhibitor of DNA binding 2 [Source:HGNC Symbol;Acc:HGNC:5361]	protein_coding	2833.78	0.568942	0.16126	0.47254	0.176237	3.52811	0.000418537	0.0246777	2661.28	1691.86	2322.48	3819.83	3228.2	2812.87	3299.95
ATP6V1F	ENSG00000128524	9296	ATPase H+ transporting V1 subunit F [Source:HGNC Symbol;Acc:HGNC:16832]	protein_coding	2828.97	0.69079	0.165367	0.608033	0.176858	4.17732	2.9496e-05	0.00538282	2511.06	1556.57	2236.29	3947.04	3281.34	2875.11	3395.41
PEF1	ENSG00000162517	553115	penta-EF-hand domain containing 1 [Source:HGNC Symbol;Acc:HGNC:30009]	protein_coding	2790.91	0.428981	0.123955	0.360536	0.132637	3.46077	0.00053864	0.0287031	2417.17	2049.73	2538.39	3413.98	3074.32	3021	3021.8
MZT2B	ENSG00000152082	80097	mitotic spindle organizing protein 2B [Source:HGNC Symbol;Acc:HGNC:25886]	protein_coding	2763.06	0.555177	0.168876	0.445805	0.187314	3.28749	0.00101086	0.0411825	2779.06	1534.75	2235.84	3354.62	3217.13	2956.73	3263.29
PSMB2	ENSG00000126067	5690	proteasome 20S subunit beta 2 [Source:HGNC Symbol;Acc:HGNC:9539]	protein_coding	2740.79	0.570441	0.135418	0.506205	0.14351	4.21245	2.52612e-05	0.0047963	2384.74	1761.69	2310.81	3464.86	3099.78	3017.94	3145.7
CKS2	ENSG00000123975	1164	CDC28 protein kinase regulatory subunit 2 [Source:HGNC Symbol;Acc:HGNC:2000]	protein_coding	2716.93	0.638731	0.174138	0.534057	0.191046	3.66797	0.000244486	0.0189363	2342.06	1624.95	2231.8	4068.18	3177.28	2463.94	3110.3
OXA1L	ENSG00000155463	5018	OXA1L mitochondrial inner membrane protein [Source:HGNC Symbol;Acc:HGNC:8526]	protein_coding	2580.41	0.411666	0.119452	0.351123	0.126965	3.44628	0.000568371	0.0294624	2292.55	1923.17	2310.36	2831.25	2870.62	2986.31	2848.58
PSMB5	ENSG00000100804	5693	proteasome 20S subunit beta 5 [Source:HGNC Symbol;Acc:HGNC:9542]	protein_coding	2503.2	0.466383	0.140613	0.37315	0.152982	3.31678	0.000910614	0.0390071	2381.32	1648.22	2150.11	2713.74	2795.34	2978.15	2855.54
TMEM9	ENSG00000116857	252839	transmembrane protein 9 [Source:HGNC Symbol;Acc:HGNC:18823]	protein_coding	2499.8	0.524727	0.13108	0.459834	0.139285	4.0031	6.25177e-05	0.00824615	2200.37	1664.22	2147.86	2994.8	2820.8	2838.38	2832.14
ATP5F1E	ENSG00000124172	514	ATP synthase F1 subunit epsilon [Source:HGNC Symbol;Acc:HGNC:838]	protein_coding	2311.93	0.591751	0.185694	0.473933	0.208759	3.1867	0.00143908	0.0496392	2043.33	1515.84	1827.82	3251.64	2992.4	1785.46	2767.03
RPA2	ENSG00000117748	6118	replication protein A2 [Source:HGNC Symbol;Acc:HGNC:10290]	protein_coding	2306.77	0.396582	0.113725	0.337105	0.119967	3.48721	0.000488095	0.0268694	1908.47	1959.54	2004.22	2517.48	2682.42	2430.27	2645.02
CLIC1	ENSG00000213719	1192	chloride intracellular channel 1 [Source:HGNC Symbol;Acc:HGNC:2062]	protein_coding	2255.74	0.393407	0.116788	0.329328	0.123998	3.36857	0.000755604	0.034952	1932.37	1779.15	2038.79	2435.1	2532.96	2595.55	2476.23
TK1	ENSG00000167900	7083	thymidine kinase 1 [Source:HGNC Symbol;Acc:HGNC:11830]	protein_coding	2188.58	0.703552	0.146874	0.641347	0.154329	4.79017	1.66642e-06	0.000925004	1829.95	1268.53	1753.3	2404.81	2804.19	2641.46	2617.84
DDX39A	ENSG00000123136	10212	DExD-box helicase 39A [Source:HGNC Symbol;Acc:HGNC:17821]	protein_coding	2178.48	0.47766	0.130723	0.409196	0.139531	3.654	0.000258187	0.0194326	1773.61	1696.23	1881.23	2167.36	2809.73	2437.41	2483.82
RSL24D1	ENSG00000137876	51187	ribosomal L24 domain containing 1 [Source:HGNC Symbol;Acc:HGNC:18479]	protein_coding	2109.97	0.637669	0.186394	0.528708	0.206515	3.42108	0.00062374	0.0314752	1753.13	1408.19	1651.86	3397.02	2216.34	1811.99	2531.23
PPP1CA	ENSG00000172531	5499	protein phosphatase 1 catalytic subunit alpha [Source:HGNC Symbol;Acc:HGNC:9281]	protein_coding	2084.84	0.398758	0.12533	0.325166	0.134256	3.18167	0.00146429	0.0500185	1792.39	1645.31	1863.28	2426.62	2093.46	2471.08	2301.75
UBL5	ENSG00000198258	59286	ubiquitin like 5 [Source:HGNC Symbol;Acc:HGNC:13736]	protein_coding	2066.82	0.590938	0.174263	0.480072	0.193022	3.39107	0.00069621	0.0334834	2014.31	1150.7	1655	2464.17	2641.46	2090.52	2451.58
NDUFB7	ENSG00000099795	4713	NADH:ubiquinone oxidoreductase subunit B7 [Source:HGNC Symbol;Acc:HGNC:7702]	protein_coding	2028.83	0.744384	0.194795	0.633646	0.212643	3.82137	0.000132711	0.0127199	1882.87	992.133	1530.66	3005.71	2117.81	2166.02	2506.57
TMEM183A	ENSG00000163444	92703	transmembrane protein 183A [Source:HGNC Symbol;Acc:HGNC:20173]	protein_coding	1988.11	0.522516	0.132693	0.459282	0.141098	3.93778	8.22389e-05	0.00944471	1701.92	1368.91	1716.05	2369.68	2384.62	2123.17	2252.44
GUK1	ENSG00000143774	2987	guanylate kinase 1 [Source:HGNC Symbol;Acc:HGNC:4693]	protein_coding	1960.5	0.641175	0.160302	0.55738	0.172202	3.99979	6.33977e-05	0.00828024	1577.31	1297.63	1595.75	2752.51	2402.33	1785.46	2312.5
NOB1	ENSG00000141101	28987	NIN1 (RPN12) binding protein 1 homolog [Source:HGNC Symbol;Acc:HGNC:29540]	protein_coding	1912.08	0.597871	0.133711	0.537837	0.140974	4.47136	7.77234e-06	0.00248628	1577.31	1261.26	1612.36	2202.49	2381.3	2138.47	2211.35
LSM7	ENSG00000130332	51690	LSM7 homolog, U6 small nuclear RNA and mRNA degradation associated [Source:HGNC Symbol;Acc:HGNC:20470]	protein_coding	1906.45	0.516591	0.152951	0.4223	0.16781	3.3775	0.000731485	0.0345562	1715.58	1220.53	1665.32	2495.67	2120.03	2014	2113.99
OST4	ENSG00000228474	100128731	oligosaccharyltransferase complex subunit 4, non-catalytic [Source:HGNC Symbol;Acc:HGNC:32483]	protein_coding	1830.52	0.574296	0.173463	0.461596	0.19293	3.31078	0.000930371	0.0395987	1758.25	1056.14	1488.02	2418.13	2113.39	1825.25	2154.45
ERAL1	ENSG00000132591	26284	Era like 12S mitochondrial rRNA chaperone 1 [Source:HGNC Symbol;Acc:HGNC:3424]	protein_coding	1740.24	0.49457	0.151679	0.405355	0.166091	3.26063	0.00111164	0.0435887	1654.12	1104.15	1484.43	2018.34	1917.44	2009.92	1993.25
ESD	ENSG00000139684	2098	esterase D [Source:HGNC Symbol;Acc:HGNC:3465]	protein_coding	1729.47	0.642597	0.137677	0.582026	0.14488	4.66744	3.04978e-06	0.00140101	1340.03	1160.88	1442.68	2252.16	2062.46	1836.48	2011.58
COX7A2L	ENSG00000115944	9167	cytochrome c oxidase subunit 7A2 like [Source:HGNC Symbol;Acc:HGNC:2289]	protein_coding	1713.41	0.554502	0.160186	0.457767	0.175495	3.46161	0.000536948	0.0287031	1561.94	1075.05	1427.42	2215.82	2043.64	1687.52	1982.5
FDFT1	ENSG00000079459	2222	farnesyl-diphosphate farnesyltransferase 1 [Source:HGNC Symbol;Acc:HGNC:3629]	protein_coding	1712.86	0.643198	0.146469	0.575346	0.155042	4.39136	1.12646e-05	0.0030504	1411.72	1093.96	1398.69	1790.58	2000.47	2269.07	2025.49
TSPO	ENSG00000100300	706	translocator protein [Source:HGNC Symbol;Acc:HGNC:1158]	protein_coding	1709.47	0.646355	0.171076	0.551348	0.185786	3.77817	0.000157986	0.0140519	1563.65	955.765	1369.07	2289.72	1793.44	1960.95	2033.71
CENPB	ENSG00000125817	1059	centromere protein B [Source:HGNC Symbol;Acc:HGNC:1852]	protein_coding	1708.96	0.540707	0.165586	0.433011	0.183422	3.26542	0.00109304	0.0435887	1217.12	1450.38	1410.81	2369.68	1481.25	2018.08	2015.37
RNASEH2C	ENSG00000172922	84153	ribonuclease H2 subunit C [Source:HGNC Symbol;Acc:HGNC:24116]	protein_coding	1708.72	0.550717	0.151447	0.461423	0.164223	3.63637	0.000276512	0.0201262	1531.21	1089.6	1439.99	2124.95	2052.5	1763.02	1959.74
ATP5MC1	ENSG00000159199	516	ATP synthase membrane subunit c locus 1 [Source:HGNC Symbol;Acc:HGNC:841]	protein_coding	1690.51	0.74766	0.226924	0.58723	0.259979	3.29476	0.000985057	0.0403889	1741.18	707.004	1214.21	2306.68	1620.74	2082.36	2161.41
RPS19BP1	ENSG00000187051	91582	ribosomal protein S19 binding protein 1 [Source:HGNC Symbol;Acc:HGNC:28749]	protein_coding	1683.68	0.595988	0.16559	0.498804	0.180839	3.59918	0.000319226	0.0218088	1555.11	989.224	1374.9	2223.08	1791.23	1877.29	1974.92
SIVA1	ENSG00000184990	10572	SIVA1 apoptosis inducing factor [Source:HGNC Symbol;Acc:HGNC:17712]	protein_coding	1654.12	0.746542	0.202844	0.628078	0.223259	3.68038	0.00023289	0.0184766	1567.06	782.65	1238	2179.47	2183.13	1578.35	2050.14
CD151	ENSG00000177697	977	CD151 molecule (Raph blood group) [Source:HGNC Symbol;Acc:HGNC:1630]	protein_coding	1650.04	0.537082	0.145408	0.457014	0.156648	3.69363	0.000221075	0.0180761	1439.03	1112.88	1394.65	1898.41	1697.13	2107.87	1900.32
LY6E	ENSG00000160932	4061	lymphocyte antigen 6 family member E [Source:HGNC Symbol;Acc:HGNC:6727]	protein_coding	1641.12	0.643787	0.155777	0.565924	0.166413	4.13275	3.58447e-05	0.00575329	1440.74	963.038	1335.85	1922.64	1816.69	2068.08	1940.78
UBXN1	ENSG00000162191	51035	UBX domain protein 1 [Source:HGNC Symbol;Acc:HGNC:18402]	protein_coding	1637.54	0.496219	0.155523	0.395607	0.171572	3.19064	0.00141958	0.0496392	1539.75	1056.14	1392.86	2024.4	1670.56	1902.79	1876.3
FIS1	ENSG00000214253	51024	fission, mitochondrial 1 [Source:HGNC Symbol;Acc:HGNC:21689]	protein_coding	1621.42	0.554693	0.173242	0.437845	0.193899	3.20185	0.00136549	0.0490893	1549.99	965.948	1328.67	2186.74	1640.67	1786.48	1891.47
MZT2A	ENSG00000173272	653784	mitotic spindle organizing protein 2A [Source:HGNC Symbol;Acc:HGNC:33187]	protein_coding	1616.82	0.604126	0.151205	0.526597	0.1619	3.99541	6.45816e-05	0.00835297	1377.58	1038.68	1334.5	1995.32	1628.49	2054.81	1888.31
ATP6V0B	ENSG00000117410	533	ATPase H+ transporting V0 subunit b [Source:HGNC Symbol;Acc:HGNC:861]	protein_coding	1612.14	1.01803	0.225534	0.908831	0.240615	4.51387	6.36539e-06	0.00223157	1399.77	587.715	1079.54	1905.67	1673.88	2464.96	2173.42
OSTC	ENSG00000198856	58505	oligosaccharyltransferase complex non-catalytic subunit [Source:HGNC Symbol;Acc:HGNC:24448]	protein_coding	1603.28	0.612299	0.182784	0.490536	0.204387	3.34985	0.000808555	0.0363904	1391.24	1029.96	1280.19	2370.89	1874.26	1377.36	1899.05
ATRAID	ENSG00000138085	51374	all-trans retinoic acid induced differentiation factor [Source:HGNC Symbol;Acc:HGNC:24090]	protein_coding	1524.2	0.746638	0.194217	0.64177	0.211296	3.84435	0.000120871	0.0121989	1437.33	717.187	1154.51	1693.66	1977.22	1788.52	1900.95
MYDGF	ENSG00000074842	56005	myeloid derived growth factor [Source:HGNC Symbol;Acc:HGNC:16948]	protein_coding	1484.48	0.492962	0.14648	0.404118	0.159361	3.36539	0.000764345	0.0350358	1252.97	1105.6	1262.68	1502.25	1583.1	1977.27	1707.51
HIGD2A	ENSG00000146066	192286	HIG1 hypoxia inducible domain family member 2A [Source:HGNC Symbol;Acc:HGNC:28311]	protein_coding	1468.07	0.581014	0.167254	0.477852	0.183911	3.47385	0.000513054	0.0276717	1297.35	933.943	1209.72	1799.06	1945.11	1374.3	1716.99
CLTB	ENSG00000175416	1212	clathrin light chain B [Source:HGNC Symbol;Acc:HGNC:2091]	protein_coding	1463.32	0.503828	0.154853	0.401985	0.170569	3.2536	0.00113954	0.044114	1365.63	939.762	1246.08	1794.22	1589.74	1642.63	1665.15
ECI2	ENSG00000198721	10455	enoyl-CoA delta isomerase 2 [Source:HGNC Symbol;Acc:HGNC:14601]	protein_coding	1455.12	0.773307	0.153246	0.710512	0.160658	5.04617	4.50743e-07	0.000428914	1075.44	896.12	1150.02	2011.07	1496.75	1802.81	1753.65
GALK1	ENSG00000108479	2584	galactokinase 1 [Source:HGNC Symbol;Acc:HGNC:4118]	protein_coding	1427.85	0.620913	0.148844	0.547702	0.158623	4.17157	3.02512e-05	0.00544603	1220.53	883.027	1184.13	1726.37	1660.6	1658.95	1661.36
YIF1A	ENSG00000174851	10897	Yip1 interacting factor homolog A, membrane trafficking protein [Source:HGNC Symbol;Acc:HGNC:16688]	protein_coding	1389.97	0.495947	0.144096	0.411427	0.156237	3.44178	0.00057789	0.0297245	1206.88	981.95	1198.49	1526.48	1471.29	1757.92	1586.76
CDK1	ENSG00000170312	983	cyclin dependent kinase 1 [Source:HGNC Symbol;Acc:HGNC:1722]	protein_coding	1371.75	0.599961	0.186577	0.475981	0.210126	3.21561	0.00130166	0.0478345	894.489	1191.43	1099.29	2018.34	1584.21	1165.14	1649.35
DCXR	ENSG00000169738	51181	dicarbonyl and L-xylulose reductase [Source:HGNC Symbol;Acc:HGNC:18985]	protein_coding	1352.84	0.566803	0.157313	0.472737	0.171289	3.60302	0.000314541	0.0215996	1189.81	868.48	1133.41	1743.33	1389.37	1586.51	1558.94
BOLA2B	ENSG00000169627	552900	bolA family member 2B [Source:HGNC Symbol;Acc:HGNC:32479]	protein_coding	1317.72	0.727568	0.227151	0.56067	0.263383	3.20302	0.00135995	0.0490893	1336.61	581.896	964.182	1904.46	1495.64	1277.37	1663.89
TBRG4	ENSG00000136270	9238	transforming growth factor beta regulator 4 [Source:HGNC Symbol;Acc:HGNC:17443]	protein_coding	1315.32	0.724821	0.158983	0.653026	0.168001	4.55911	5.13702e-06	0.0020738	868.883	977.586	1040.04	1315.68	1508.93	1888.51	1607.62
TMEM230	ENSG00000089063	29058	transmembrane protein 230 [Source:HGNC Symbol;Acc:HGNC:15876]	protein_coding	1285.76	0.532552	0.154328	0.43961	0.168608	3.45077	0.000558986	0.0292032	1087.38	897.575	1095.7	1570.09	1631.81	1249.82	1467.91
YIF1B	ENSG00000167645	90522	Yip1 interacting factor homolog B, membrane trafficking protein [Source:HGNC Symbol;Acc:HGNC:30511]	protein_coding	1260.5	0.469236	0.145827	0.377589	0.159458	3.21775	0.00129198	0.0476781	1128.35	877.209	1101.99	1446.52	1368.33	1487.55	1413.54
EIF6	ENSG00000242372	3692	eukaryotic translation initiation factor 6 [Source:HGNC Symbol;Acc:HGNC:6159]	protein_coding	1256.17	0.707421	0.178322	0.611341	0.192731	3.96709	7.27543e-05	0.00883953	1133.47	657.543	987.973	1435.62	1556.53	1499.79	1522.28
PIN1	ENSG00000127445	5300	peptidylprolyl cis/trans isomerase, NIMA-interacting 1 [Source:HGNC Symbol;Acc:HGNC:8988]	protein_coding	1183.67	0.675951	0.179409	0.572995	0.195609	3.76764	0.000164796	0.0144435	1065.19	651.724	939.943	1457.42	1225.52	1522.23	1423.66
NDUFS7	ENSG00000115286	374291	NADH:ubiquinone oxidoreductase core subunit S7 [Source:HGNC Symbol;Acc:HGNC:7714]	protein_coding	1172.87	0.640008	0.161354	0.554649	0.173693	3.96649	7.29404e-05	0.00883953	979.841	733.189	962.836	1503.46	1460.22	1201.87	1368.66
NPM3	ENSG00000107833	10360	nucleophosmin/nucleoplasmin 3 [Source:HGNC Symbol;Acc:HGNC:7931]	protein_coding	1169.24	0.568736	0.166982	0.463712	0.184284	3.40597	0.000659299	0.0325303	1070.31	712.823	973.16	1423.5	1417.04	1232.48	1355.38
MAPKAPK3	ENSG00000114738	7867	MAPK activated protein kinase 3 [Source:HGNC Symbol;Acc:HGNC:6888]	protein_coding	1157.36	0.561481	0.173618	0.444102	0.194074	3.234	0.00122069	0.0456529	1051.54	731.734	954.307	1398.06	1100.42	1506.93	1358.54
CD320	ENSG00000167775	51293	CD320 molecule [Source:HGNC Symbol;Acc:HGNC:16692]	protein_coding	1153.19	0.548394	0.154557	0.458238	0.168109	3.54816	0.000387933	0.0236325	943.993	827.747	972.711	1268.43	1175.7	1546.72	1337.05
NCAPH2	ENSG00000025770	29781	non-SMC condensin II complex subunit H2 [Source:HGNC Symbol;Acc:HGNC:25071]	protein_coding	1142.04	0.644038	0.17943	0.535008	0.197171	3.58934	0.000331511	0.0224182	821.086	868.48	910.318	1463.48	969.789	1585.49	1375.61
SLC35B1	ENSG00000121073	10237	solute carrier family 35 member B1 [Source:HGNC Symbol;Acc:HGNC:20798]	protein_coding	1141.46	0.702626	0.175285	0.610368	0.188962	4.00847	6.11132e-05	0.00816719	957.65	670.635	903.136	1120.63	1572.03	1380.42	1385.73
VPS51	ENSG00000149823	738	VPS51 subunit of GARP complex [Source:HGNC Symbol;Acc:HGNC:1172]	protein_coding	1139.21	0.496372	0.153228	0.397737	0.168446	3.23943	0.0011977	0.0451603	969.599	830.657	974.507	1123.05	1458	1315.12	1303.55
TMEM205	ENSG00000105518	374882	transmembrane protein 205 [Source:HGNC Symbol;Acc:HGNC:29631]	protein_coding	1135.52	0.576029	0.164139	0.476813	0.180003	3.5094	0.000449111	0.0255686	889.368	823.383	954.756	1587.05	1293.05	1088.62	1312.4
RBIS	ENSG00000176731	401466	ribosomal biogenesis factor [Source:HGNC Symbol;Acc:HGNC:32235]	protein_coding	1076.1	0.653002	0.192561	0.526928	0.215661	3.39115	0.000696004	0.0334834	844.985	739.008	854.208	1688.82	1169.06	953.947	1282.68
ECH1	ENSG00000104823	1891	enoyl-CoA hydratase 1 [Source:HGNC Symbol;Acc:HGNC:3149]	protein_coding	1073.26	0.690117	0.171573	0.599692	0.184874	4.02229	5.76343e-05	0.00808215	921.802	609.536	862.288	1312.04	1367.22	1161.06	1278.89
FARSA	ENSG00000179115	2193	phenylalanyl-tRNA synthetase subunit alpha [Source:HGNC Symbol;Acc:HGNC:3592]	protein_coding	1070.12	0.523609	0.151783	0.430475	0.165446	3.44972	0.000561179	0.0292032	735.734	928.124	909.869	1184.84	1167.95	1328.38	1235.9
NOSIP	ENSG00000142546	51070	nitric oxide synthase interacting protein [Source:HGNC Symbol;Acc:HGNC:17946]	protein_coding	1061.16	0.874999	0.19676	0.781166	0.209803	4.44704	8.70624e-06	0.00257743	862.055	529.526	776.553	1035.82	1295.27	1572.23	1356.65
DEF8	ENSG00000140995	54849	differentially expressed in FDCP 8 homolog [Source:HGNC Symbol;Acc:HGNC:25969]	protein_coding	1051.25	0.569077	0.174545	0.453837	0.195085	3.26035	0.00111274	0.0435887	983.255	622.629	872.163	1298.72	1213.34	1144.74	1223.89
MRPL41	ENSG00000182154	64975	mitochondrial ribosomal protein L41 [Source:HGNC Symbol;Acc:HGNC:14492]	protein_coding	1031.13	0.690399	0.208971	0.546281	0.237517	3.3038	0.000953823	0.0396471	1019.1	490.248	787.775	1303.56	1146.92	1205.95	1264.35
IGFBP2	ENSG00000115457	3485	insulin like growth factor binding protein 2 [Source:HGNC Symbol;Acc:HGNC:5471]	protein_coding	1020.93	0.635108	0.193107	0.505655	0.217519	3.28889	0.00100583	0.0411033	914.974	615.355	803.934	1144.86	947.647	1484.48	1235.27
CUTA	ENSG00000112514	51596	cutA divalent cation tolerance homolog [Source:HGNC Symbol;Acc:HGNC:21101]	protein_coding	1012.9	0.528604	0.164048	0.418445	0.183475	3.22226	0.00127184	0.047065	865.469	651.724	915.255	1210.28	1140.28	1216.16	1091.13
ATP6V0E1	ENSG00000113732	8992	ATPase H+ transporting V0 subunit e1 [Source:HGNC Symbol;Acc:HGNC:863]	protein_coding	1004.89	0.680344	0.168703	0.59065	0.1816	4.03279	5.51185e-05	0.00781158	827.914	610.991	812.463	1263.58	1027.36	1297.78	1194.18
RPS27L	ENSG00000185088	51065	ribosomal protein S27 like [Source:HGNC Symbol;Acc:HGNC:18476]	protein_coding	967.236	0.695701	0.199596	0.568906	0.222778	3.48555	0.000491131	0.0269253	817.672	574.622	756.802	1488.92	1076.07	892.731	1163.83
TMEM101	ENSG00000091947	84336	transmembrane protein 101 [Source:HGNC Symbol;Acc:HGNC:28653]	protein_coding	930.467	0.667986	0.168506	0.578193	0.181664	3.96417	7.36517e-05	0.00883953	716.957	624.084	755.905	1083.07	928.827	1293.7	1110.73
ILVBL	ENSG00000105135	10994	ilvB acetolactate synthase like [Source:HGNC Symbol;Acc:HGNC:6041]	protein_coding	883.35	0.617843	0.152171	0.53847	0.16302	4.06018	4.90351e-05	0.0071005	682.816	609.536	743.785	1062.48	1050.6	1015.16	1019.07
NDUFA11	ENSG00000174886	126328	NADH:ubiquinone oxidoreductase subunit A11 [Source:HGNC Symbol;Acc:HGNC:20371]	protein_coding	877.351	0.684729	0.195401	0.560889	0.217571	3.50423	0.000457932	0.0258236	800.602	469.881	689.022	1102.46	1130.31	902.934	1046.25
PAFAH1B3	ENSG00000079462	5050	platelet activating factor acetylhydrolase 1b catalytic subunit 3 [Source:HGNC Symbol;Acc:HGNC:8576]	protein_coding	846.653	0.581061	0.174097	0.467776	0.193711	3.33757	0.000845152	0.0372818	751.098	529.526	703.835	1018.86	890.08	1053.93	979.239
TXNDC17	ENSG00000129235	84817	thioredoxin domain containing 17 [Source:HGNC Symbol;Acc:HGNC:28218]	protein_coding	833.117	0.701075	0.19863	0.56943	0.221673	3.52954	0.00041628	0.0246777	684.523	506.25	655.806	1233.3	1000.79	752.955	998.205
NOA1	ENSG00000084092	84273	nitric oxide associated 1 [Source:HGNC Symbol;Acc:HGNC:28473]	protein_coding	829.062	0.74953	0.194576	0.638479	0.212457	3.85212	0.000117102	0.0120002	734.027	417.511	648.175	980.096	977.538	1026.39	1019.7
TIMM8B	ENSG00000150779	26521	translocase of inner mitochondrial membrane 8 homolog B [Source:HGNC Symbol;Acc:HGNC:11818]	protein_coding	819.456	0.806273	0.240835	0.637337	0.276553	3.34782	0.000814495	0.0365344	739.148	398.599	588.923	1181.2	1144.7	646.848	1036.77
COMMD6	ENSG00000188243	170622	COMM domain containing 6 [Source:HGNC Symbol;Acc:HGNC:24015]	protein_coding	780.83	0.609976	0.191448	0.473848	0.218369	3.18611	0.001442	0.0496392	599.171	552.801	652.664	1068.53	1016.29	685.618	890.735
VPS28	ENSG00000160948	51160	VPS28 subunit of ESCRT-I [Source:HGNC Symbol;Acc:HGNC:18178]	protein_coding	770.202	0.876232	0.16098	0.815197	0.168066	5.44311	5.23575e-08	9.96439e-05	503.577	474.245	594.759	969.192	923.292	982.515	943.838
HSPBP1	ENSG00000133265	23640	HSPA (Hsp70) binding protein 1 [Source:HGNC Symbol;Acc:HGNC:24989]	protein_coding	765.628	0.570541	0.172675	0.464621	0.192906	3.30414	0.000952689	0.0396471	611.12	510.614	681.84	970.404	826.977	923.339	835.103
NLE1	ENSG00000073536	54475	notchless homolog 1 [Source:HGNC Symbol;Acc:HGNC:19889]	protein_coding	720.848	0.811361	0.214327	0.682951	0.235682	3.78562	0.000153323	0.0138951	573.565	405.873	539.547	821.391	654.275	1131.47	919.815
GSTZ1	ENSG00000100577	2954	glutathione S-transferase zeta 1 [Source:HGNC Symbol;Acc:HGNC:4643]	protein_coding	714.349	0.630902	0.177215	0.523013	0.195318	3.56009	0.00037073	0.0232161	512.112	525.161	600.145	988.576	813.692	724.388	836.368
NTHL1	ENSG00000065057	4913	nth like DNA glycosylase 1 [Source:HGNC Symbol;Acc:HGNC:8028]	protein_coding	713.541	0.819665	0.168366	0.747616	0.177559	4.86835	1.12536e-06	0.000832893	503.577	432.058	561.093	925.579	877.902	833.556	861.023
NUDT1	ENSG00000106268	4521	nudix hydrolase 1 [Source:HGNC Symbol;Acc:HGNC:8048]	protein_coding	695.019	0.747583	0.204728	0.623616	0.226533	3.65159	0.000260623	0.0195057	619.656	350.592	538.201	898.926	831.405	780.502	845.85
GTPBP6	ENSG00000178605	8225	GTP binding protein 6 (putative) [Source:HGNC Symbol;Acc:HGNC:30189]	protein_coding	690.529	0.584395	0.167756	0.481454	0.184454	3.4836	0.000494717	0.0270107	517.233	516.433	583.088	722.048	809.264	881.509	804.127
GFUS	ENSG00000104522	7264	GDP-L-fucose synthase [Source:HGNC Symbol;Acc:HGNC:12390]	protein_coding	686.945	0.542008	0.169476	0.426734	0.189289	3.19813	0.00138322	0.0491392	503.577	551.347	583.986	717.202	774.945	883.549	794.012
UQCC3	ENSG00000204922	790955	ubiquinol-cytochrome c reductase complex assembly factor 3 [Source:HGNC Symbol;Acc:HGNC:34399]	protein_coding	683.059	0.90893	0.284407	0.687254	0.339732	3.19588	0.00139404	0.0493922	696.472	222.575	450.67	947.386	658.703	879.468	926.137
MECR	ENSG00000116353	51102	mitochondrial trans-2-enoyl-CoA reductase [Source:HGNC Symbol;Acc:HGNC:19691]	protein_coding	676.014	0.809914	0.215357	0.682409	0.23731	3.7608	0.000169371	0.0146517	448.952	461.153	514.859	1028.56	552.425	873.346	852.804
HILPDA	ENSG00000135245	29923	hypoxia inducible lipid droplet associated [Source:HGNC Symbol;Acc:HGNC:28859]	protein_coding	675.13	0.744867	0.19129	0.63753	0.208474	3.89392	9.86389e-05	0.0108189	518.94	413.146	534.161	993.422	739.519	721.327	805.391
DRAM2	ENSG00000156171	128338	DNA damage regulated autophagy modulator 2 [Source:HGNC Symbol;Acc:HGNC:28769]	protein_coding	651.927	0.773032	0.219302	0.631468	0.24613	3.52497	0.000423533	0.024856	524.061	373.868	499.597	1030.98	737.305	594.814	802.863
ALG3	ENSG00000214160	10195	ALG3 alpha-1,3- mannosyltransferase [Source:HGNC Symbol;Acc:HGNC:23056]	protein_coding	633.534	0.924401	0.261817	0.752096	0.296431	3.53071	0.000414449	0.0246777	587.222	244.396	430.471	694.184	643.204	990.677	844.586
MPV17	ENSG00000115204	4358	mitochondrial inner membrane protein MPV17 [Source:HGNC Symbol;Acc:HGNC:7224]	protein_coding	616.7	0.718499	0.218078	0.56444	0.249775	3.29469	0.000985317	0.0403889	544.546	331.681	480.296	897.714	708.521	605.017	749.128
TMEM219	ENSG00000149932	124446	transmembrane protein 219 [Source:HGNC Symbol;Acc:HGNC:25201]	protein_coding	566.438	0.832968	0.186102	0.743678	0.198515	4.47587	7.61018e-06	0.00248628	414.811	324.407	442.59	649.359	722.913	716.226	694.761
ZMAT5	ENSG00000100319	55954	zinc finger matrin-type 5 [Source:HGNC Symbol;Acc:HGNC:28046]	protein_coding	564.871	0.889776	0.203203	0.789843	0.21794	4.37876	1.19359e-05	0.0030504	437.002	277.855	433.613	722.048	655.382	718.266	709.933
POLR1H	ENSG00000066379	30834	RNA polymerase I subunit H [Source:HGNC Symbol;Acc:HGNC:13182]	protein_coding	562.331	0.805913	0.210407	0.684693	0.230667	3.83026	0.000128007	0.0125108	377.256	381.142	428.226	563.343	891.187	597.875	697.289
TTC38	ENSG00000075234	55020	tetratricopeptide repeat domain 38 [Source:HGNC Symbol;Acc:HGNC:26082]	protein_coding	560.659	0.883248	0.238322	0.738837	0.264375	3.70611	0.000210465	0.0176341	368.721	369.504	402.192	542.748	521.427	983.535	736.484
LCMT1	ENSG00000205629	51451	leucine carboxyl methyltransferase 1 [Source:HGNC Symbol;Acc:HGNC:17557]	protein_coding	547.742	0.640141	0.179098	0.533622	0.197278	3.57425	0.000351239	0.0228977	418.225	373.868	457.403	634.821	674.202	639.706	635.968
MACROD1	ENSG00000133315	28992	mono-ADP ribosylhydrolase 1 [Source:HGNC Symbol;Acc:HGNC:29598]	protein_coding	546.924	0.78368	0.187472	0.688049	0.201821	4.18025	2.91183e-05	0.00538282	394.326	338.955	433.613	722.048	593.387	688.679	657.462
PDPN	ENSG00000162493	10630	podoplanin [Source:HGNC Symbol;Acc:HGNC:29602]	protein_coding	544.115	0.610219	0.191402	0.474645	0.217821	3.18815	0.00143186	0.0496392	401.154	401.508	456.057	728.106	531.391	653.99	636.6
EIPR1	ENSG00000032389	7260	EARP complex and GARP complex interacting protein 1 [Source:HGNC Symbol;Acc:HGNC:12383]	protein_coding	536.93	0.788346	0.23222	0.62943	0.264518	3.39482	0.000686743	0.0333898	474.557	267.672	401.294	576.669	562.389	798.867	677.06
BPHL	ENSG00000137274	670	biphenyl hydrolase like [Source:HGNC Symbol;Acc:HGNC:1094]	protein_coding	528.717	0.962663	0.215745	0.858935	0.23055	4.46204	8.11844e-06	0.00251521	274.833	375.323	384.685	655.416	522.534	802.948	685.278
OXLD1	ENSG00000204237	339229	oxidoreductase like domain containing 1 [Source:HGNC Symbol;Acc:HGNC:27901]	protein_coding	526.077	0.952892	0.293109	0.730227	0.347375	3.25098	0.00115008	0.0441536	518.94	168.75	344.736	782.623	612.207	547.882	707.404
MRPL44	ENSG00000135900	65080	mitochondrial ribosomal protein L44 [Source:HGNC Symbol;Acc:HGNC:16650]	protein_coding	507.892	0.86511	0.195239	0.771046	0.208542	4.43102	9.37864e-06	0.00265834	302.146	349.138	391.867	536.69	687.487	651.949	635.968
COQ2	ENSG00000173085	27235	coenzyme Q2, polyprenyltransferase [Source:HGNC Symbol;Acc:HGNC:25223]	protein_coding	488.306	0.725297	0.198472	0.605223	0.219286	3.6544	0.00025778	0.0194326	353.357	325.862	391.867	597.265	494.858	668.273	586.659
SCO2	ENSG00000284194	9997	synthesis of cytochrome C oxidase 2 [Source:HGNC Symbol;Acc:HGNC:10604]	protein_coding	476.276	0.657217	0.196074	0.525415	0.221032	3.35188	0.00080265	0.036283	319.217	365.14	392.316	638.455	554.639	509.112	555.05
TSSC4	ENSG00000184281	10078	tumor suppressing subtransferable candidate 4 [Source:HGNC Symbol;Acc:HGNC:12386]	protein_coding	474.855	1.04997	0.297302	0.850065	0.339628	3.53165	0.00041298	0.0246777	353.357	226.94	307.479	965.558	404.079	422.39	644.187
INIP	ENSG00000148153	58493	INTS3 and NABP interacting protein [Source:HGNC Symbol;Acc:HGNC:24994]	protein_coding	469.81	0.771841	0.20251	0.654564	0.22234	3.81137	0.000138199	0.0129654	331.166	301.131	376.157	616.649	621.063	475.443	567.061
WARS2	ENSG00000116874	10352	tryptophanyl tRNA synthetase 2, mitochondrial [Source:HGNC Symbol;Acc:HGNC:12730]	protein_coding	458.994	0.885279	0.25162	0.718398	0.285342	3.51831	0.000434298	0.0250844	389.205	210.937	332.167	725.683	504.821	467.281	582.866
TMEM141	ENSG00000244187	85014	transmembrane protein 141 [Source:HGNC Symbol;Acc:HGNC:28211]	protein_coding	457.018	1.13062	0.259264	0.999506	0.279652	4.3609	1.29529e-05	0.0031763	288.49	226.94	307.03	789.892	607.778	368.315	610.681
SIGIRR	ENSG00000185187	59307	single Ig and TIR domain containing [Source:HGNC Symbol;Acc:HGNC:30575]	protein_coding	442.249	1.05257	0.286005	0.871916	0.321454	3.68025	0.000233006	0.0184766	387.498	149.838	289.524	691.761	443.933	537.679	595.509
GNG5	ENSG00000174021	2787	G protein subunit gamma 5 [Source:HGNC Symbol;Acc:HGNC:4408]	protein_coding	422.098	0.76056	0.226018	0.604691	0.258043	3.36505	0.000765307	0.0350358	363.6	218.211	329.474	474.904	547.997	504.011	516.487
VIPAS39	ENSG00000151445	63894	VPS33B interacting protein, apical-basolateral polarity regulator, spe-39 homolog [Source:HGNC Symbol;Acc:HGNC:20347]	protein_coding	417.801	0.845561	0.210508	0.730903	0.228843	4.01677	5.90019e-05	0.00813371	228.743	312.769	324.087	487.019	497.072	554.004	520.912
PPP1R35	ENSG00000160813	221908	protein phosphatase 1 regulatory subunit 35 [Source:HGNC Symbol;Acc:HGNC:28320]	protein_coding	410.448	0.758118	0.236951	0.580202	0.27745	3.19948	0.00137677	0.0491392	365.307	203.664	317.803	530.633	510.357	442.795	502.579
MGST2	ENSG00000085871	4258	microsomal glutathione S-transferase 2 [Source:HGNC Symbol;Acc:HGNC:7063]	protein_coding	408.623	0.811717	0.246099	0.634351	0.285368	3.29834	0.000972574	0.040238	367.014	189.116	303.439	528.21	526.963	441.775	503.844
PSMA6	ENSG00000100902	5687	proteasome 20S subunit alpha 6 [Source:HGNC Symbol;Acc:HGNC:9535]	protein_coding	389.021	1.08703	0.237995	0.973199	0.254399	4.56744	4.93727e-06	0.00205545	175.825	266.218	273.365	569.401	526.963	399.944	511.43
FRG1	ENSG00000109536	2483	FSHD region gene 1 [Source:HGNC Symbol;Acc:HGNC:3954]	protein_coding	379.077	1.04172	0.243223	0.916206	0.263009	4.28299	1.84397e-05	0.00409423	274.833	170.205	269.325	569.401	401.864	475.443	492.464
NUBP1	ENSG00000103274	4682	nucleotide binding protein 1 [Source:HGNC Symbol;Acc:HGNC:8041]	protein_coding	376.856	0.911779	0.210664	0.809209	0.226334	4.32813	1.50382e-05	0.00351472	237.279	231.304	287.729	439.771	509.25	464.22	468.442
GCAT	ENSG00000100116	23464	glycine C-acetyltransferase [Source:HGNC Symbol;Acc:HGNC:4188]	protein_coding	362.14	0.684629	0.208974	0.537442	0.239007	3.27615	0.00105234	0.0424826	261.177	248.761	298.95	438.56	435.076	429.531	422.925
DHRS4	ENSG00000157326	10901	dehydrogenase/reductase 4 [Source:HGNC Symbol;Acc:HGNC:16985]	protein_coding	354.689	0.701203	0.215175	0.547535	0.247248	3.25876	0.001119	0.0435887	220.208	272.036	294.911	437.348	410.721	423.41	424.19
USE1	ENSG00000053501	55850	unconventional SNARE in the ER 1 [Source:HGNC Symbol;Acc:HGNC:30882]	protein_coding	348.28	0.729903	0.219566	0.576892	0.251263	3.3243	0.000886412	0.0381729	256.056	224.03	281.893	416.753	468.288	377.498	413.443
KLRG2	ENSG00000188883	346689	killer cell lectin like receptor G2 [Source:HGNC Symbol;Acc:HGNC:24778]	protein_coding	323.4	1.1019	0.229487	0.998468	0.244015	4.8016	1.57405e-06	0.000925004	187.774	173.114	229.824	454.309	367.545	434.633	416.603
PLAG1	ENSG00000181690	5324	PLAG1 zinc finger [Source:HGNC Symbol;Acc:HGNC:9045]	protein_coding	287.868	1.01943	0.30916	0.786667	0.366578	3.29742	0.000975769	0.0402452	204.845	146.929	195.26	546.382	305.55	233.641	382.466
PRADC1	ENSG00000135617	84279	protease associated domain containing 1 [Source:HGNC Symbol;Acc:HGNC:16047]	protein_coding	265.923	1.73524	0.294241	1.62903	0.307932	5.89735	3.69386e-09	8.83744e-06	139.977	64.0086	146.333	414.33	337.655	357.093	402.063
CYB561D2	ENSG00000114395	11068	cytochrome b561 family member D2 [Source:HGNC Symbol;Acc:HGNC:30253]	protein_coding	256.694	1.27827	0.285315	1.13746	0.307361	4.4802	7.45721e-06	0.00248628	131.442	129.472	167.879	454.309	243.554	319.343	350.857
TMSB15A	ENSG00000158164	11013	thymosin beta 15A [Source:HGNC Symbol;Acc:HGNC:30744]	protein_coding	249.504	1.29532	0.337994	1.08966	0.378002	3.83239	0.000126906	0.0125108	153.634	107.651	150.373	528.21	219.199	239.762	347.696
COMMD8	ENSG00000169019	54951	COMM domain containing 8 [Source:HGNC Symbol;Acc:HGNC:26036]	protein_coding	238.848	1.08463	0.338788	0.813716	0.412774	3.20151	0.00136707	0.0490893	124.614	160.021	153.515	422.81	336.548	152.019	322.409
SVBP	ENSG00000177868	374969	small vasohibin binding protein [Source:HGNC Symbol;Acc:HGNC:29204]	protein_coding	209.176	0.863569	0.269974	0.654021	0.322149	3.19871	0.00138043	0.0491392	145.098	122.198	162.044	285.912	252.411	241.803	254.767
TMEM126A	ENSG00000171202	84233	transmembrane protein 126A [Source:HGNC Symbol;Acc:HGNC:25382]	protein_coding	193.668	1.31621	0.370995	1.05962	0.429263	3.54778	0.000388494	0.0236325	146.805	56.7349	112.219	356.178	247.982	168.344	267.41
FAR2	ENSG00000064763	55711	fatty acyl-CoA reductase 2 [Source:HGNC Symbol;Acc:HGNC:25531]	protein_coding	176.29	1.42969	0.37176	1.20417	0.415438	3.84574	0.000120191	0.0121989	56.3323	113.47	100.997	185.358	353.154	164.263	260.456
BCDIN3D	ENSG00000186666	144233	BCDIN3 domain containing RNA methyltransferase [Source:HGNC Symbol;Acc:HGNC:27050]	protein_coding	175.374	1.00239	0.301534	0.778731	0.355885	3.32429	0.000886425	0.0381729	112.665	94.5581	130.174	192.627	269.017	200.992	227.583
HLA-F	ENSG00000204642	3134	major histocompatibility complex, class I, F [Source:HGNC Symbol;Acc:HGNC:4963]	protein_coding	168.875	1.07472	0.32425	0.832982	0.38507	3.31448	0.000918129	0.0392029	114.372	81.4655	116.707	247.144	153.882	247.924	220.629
TRIM21	ENSG00000132109	6737	tripartite motif containing 21 [Source:HGNC Symbol;Acc:HGNC:11312]	protein_coding	157.414	1.25524	0.366745	0.988692	0.431804	3.42266	0.000620125	0.0314319	121.2	46.5517	98.3035	251.99	180.452	184.668	218.733
SNX29	ENSG00000048471	92017	sorting nexin 29 [Source:HGNC Symbol;Acc:HGNC:30542]	protein_coding	156.885	1.85542	0.480063	1.56673	0.536812	3.86496	0.000111108	0.0114742	17.0704	109.106	62.8424	124.784	208.128	305.059	271.203
TPGS1	ENSG00000141933	91978	tubulin polyglutamylase complex subunit 1 [Source:HGNC Symbol;Acc:HGNC:25058]	protein_coding	146.298	1.12162	0.351606	0.833838	0.433425	3.18999	0.00142278	0.0496392	107.544	58.1896	98.7524	239.875	161.631	165.283	192.813
TRAF3IP2	ENSG00000056972	10758	TRAF3 interacting protein 2 [Source:HGNC Symbol;Acc:HGNC:1343]	protein_coding	136.7	2.21634	0.460794	2.0051	0.492803	4.80982	1.51069e-06	0.000925004	52.9182	27.6401	56.1093	128.418	104.064	346.89	240.859
					1740.24
					MEDIAN

## Sheet: pDEGs down
hgnc_symbol	ensembl	entrez	description	gene_biotype	baseMean	log2FoldChange	lfcSE	LFC_Shrunken	lfcSE_Shrunken	stat	pvalue	padj	L15.R2	L15.R3	L15.R4	L15m.R1	L15m.R2	L15m.R3	L15m.R4
MKI67	ENSG00000148773	4288	marker of proliferation Ki-67 [Source:HGNC Symbol;Acc:HGNC:7107]	protein_coding	3057.2	-0.402283	0.117268	-0.339094	0.12346	-3.43045	0.000602581	0.030757	3229.72	3881.25	3529.5	2871.23	2694.6	2573.11	2621
DNMT1	ENSG00000130816	1786	DNA methyltransferase 1 [Source:HGNC Symbol;Acc:HGNC:2976]	protein_coding	2613.21	-0.433025	0.135133	-0.350844	0.144878	-3.20444	0.00135327	0.0489963	2572.51	3529.2	3089.6	2145.55	2404.54	2364.97	2186.06
SMARCC1	ENSG00000173473	6599	SWI/SNF related, matrix associated, actin dependent regulator of chromatin subfamily c member 1 [Source:HGNC Symbol;Acc:HGNC:11104]	protein_coding	2423.63	-0.456524	0.143384	-0.369432	0.154933	-3.18392	0.00145297	0.0497596	2473.5	3225.16	2895.24	1871.75	2468.75	2023.18	2007.79
RBM5	ENSG00000003756	10181	RNA binding motif protein 5 [Source:HGNC Symbol;Acc:HGNC:9902]	protein_coding	1510.31	-0.456832	0.141393	-0.369614	0.152183	-3.23094	0.00123385	0.0459146	1618.27	1960.99	1776.65	1430.77	1356.15	1158	1271.3
OGT	ENSG00000147162	8473	O-linked N-acetylglucosamine (GlcNAc) transferase [Source:HGNC Symbol;Acc:HGNC:8127]	protein_coding	4026.31	-0.440542	0.125269	-0.370398	0.132623	-3.51677	0.00043684	0.0250844	4161.76	5301.07	4737.42	3625.99	3821.59	3148.54	3387.83
HUWE1	ENSG00000086758	10075	HECT, UBA and WWE domain containing E3 ubiquitin protein ligase 1 [Source:HGNC Symbol;Acc:HGNC:30892]	protein_coding	3946.22	-0.451564	0.125296	-0.374595	0.132546	-3.60397	0.000313389	0.0215996	4021.79	5273.43	4675.03	3154.72	3589.1	3615.82	3293.63
ACTN4	ENSG00000130402	81	actinin alpha 4 [Source:HGNC Symbol;Acc:HGNC:166]	protein_coding	1653.48	-0.456012	0.133998	-0.379674	0.142929	-3.40312	0.0006662	0.0326193	1800.93	2112.28	1950.36	1318.1	1585.32	1414.09	1393.31
GPATCH8	ENSG00000186566	23131	G-patch domain containing 8 [Source:HGNC Symbol;Acc:HGNC:29066]	protein_coding	1098.17	-0.463174	0.137994	-0.382411	0.147691	-3.35649	0.000789397	0.035892	1300.76	1323.81	1279.74	984.942	983.073	880.488	934.355
SLC7A1	ENSG00000139514	6541	solute carrier family 7 member 1 [Source:HGNC Symbol;Acc:HGNC:11057]	protein_coding	2128.53	-0.466808	0.133268	-0.391961	0.141886	-3.50277	0.000460447	0.0258236	2401.81	2649.08	2524.92	1562.82	2010.43	1974.21	1776.41
EIF4G1	ENSG00000114867	1981	eukaryotic translation initiation factor 4 gamma 1 [Source:HGNC Symbol;Acc:HGNC:3296]	protein_coding	3404.89	-0.46167	0.127173	-0.394691	0.134558	-3.63024	0.000283161	0.0201726	3490.9	4560.61	4044.36	2719.8	3182.81	2998.56	2837.2
PABPC4	ENSG00000090621	8761	poly(A) binding protein cytoplasmic 4 [Source:HGNC Symbol;Acc:HGNC:8557]	protein_coding	1575.85	-0.466586	0.131147	-0.395022	0.139213	-3.55773	0.00037407	0.0232161	1882.87	1872.25	1854.75	1229.66	1355.05	1506.93	1329.46
CLTC	ENSG00000141367	1213	clathrin heavy chain [Source:HGNC Symbol;Acc:HGNC:2092]	protein_coding	3290.63	-0.492751	0.133027	-0.422009	0.140996	-3.70415	0.000212097	0.0176448	3630.87	4265.3	3916.88	3147.45	3007.89	2339.47	2726.57
MTOR	ENSG00000198793	2475	mechanistic target of rapamycin kinase [Source:HGNC Symbol;Acc:HGNC:3942]	protein_coding	1256.78	-0.549805	0.168693	-0.439672	0.185345	-3.2592	0.00111728	0.0435887	1184.69	1867.89	1543.68	1120.63	1003	1074.34	1003.26
ZNF592	ENSG00000166716	9640	zinc finger protein 592 [Source:HGNC Symbol;Acc:HGNC:28986]	protein_coding	825.353	-0.539976	0.16027	-0.440447	0.17412	-3.36917	0.00075396	0.034952	988.376	1031.41	991.115	599.688	721.806	769.279	675.795
MSI2	ENSG00000153944	124540	musashi RNA binding protein 2 [Source:HGNC Symbol;Acc:HGNC:18585]	protein_coding	841.586	-0.532958	0.149171	-0.448241	0.159809	-3.5728	0.000353182	0.0228977	1043	1018.32	1002.79	669.954	706.307	750.915	699.818
DIAPH1	ENSG00000131504	1729	diaphanous related formin 1 [Source:HGNC Symbol;Acc:HGNC:2876]	protein_coding	1430.85	-0.518728	0.133749	-0.450431	0.141255	-3.87837	0.00010516	0.0111039	1633.64	1844.61	1704.38	1143.65	1327.37	1176.37	1185.96
RRBP1	ENSG00000125844	6238	ribosome binding protein 1 [Source:HGNC Symbol;Acc:HGNC:10448]	protein_coding	1244.63	-0.553922	0.163552	-0.451611	0.178077	-3.38683	0.000707049	0.033761	1319.54	1716.59	1523.03	875.908	1224.41	1055.97	996.94
SPTAN1	ENSG00000197694	6709	spectrin alpha, non-erythrocytic 1 [Source:HGNC Symbol;Acc:HGNC:11273]	protein_coding	2389.62	-0.533134	0.14909	-0.452736	0.159908	-3.57591	0.000349014	0.0228977	2342.06	3437.55	2913.2	1835.41	2250.66	2027.27	1921.18
POGZ	ENSG00000143442	23126	pogo transposable element derived with ZNF domain [Source:HGNC Symbol;Acc:HGNC:18801]	protein_coding	991.16	-0.529491	0.139741	-0.456226	0.148211	-3.78908	0.000151204	0.0137969	1200.05	1224.89	1179.19	808.064	834.727	866.205	824.989
KIAA0319L	ENSG00000142687	79932	KIAA0319 like [Source:HGNC Symbol;Acc:HGNC:30071]	protein_coding	815.502	-0.585114	0.183186	-0.458759	0.203924	-3.1941	0.00140269	0.0494918	930.337	1079.42	1008.62	566.978	624.384	853.961	644.819
DCAF16	ENSG00000163257	54876	DDB1 and CUL4 associated factor 16 [Source:HGNC Symbol;Acc:HGNC:25987]	protein_coding	819.569	-0.567649	0.168248	-0.461573	0.183641	-3.37389	0.000741148	0.0347962	851.813	1165.25	998.746	709.933	639.883	710.104	661.255
MAP4	ENSG00000047849	4134	microtubule associated protein 4 [Source:HGNC Symbol;Acc:HGNC:6862]	protein_coding	1779.31	-0.576644	0.174267	-0.462809	0.191893	-3.30897	0.00093641	0.0396027	1684.85	2647.63	2232.25	1242.99	1496.75	1768.12	1382.57
ARHGAP35	ENSG00000160007	2909	Rho GTPase activating protein 35 [Source:HGNC Symbol;Acc:HGNC:4591]	protein_coding	976.613	-0.560953	0.157611	-0.468875	0.169786	-3.55909	0.000372141	0.0232161	1036.17	1367.46	1181.89	770.508	819.228	873.346	787.69
CREBZF	ENSG00000137504	58487	CREB/ATF bZIP transcription factor [Source:HGNC Symbol;Acc:HGNC:24905]	protein_coding	1285.91	-0.541543	0.139113	-0.470202	0.147126	-3.89284	9.90767e-05	0.0108189	1640.47	1518.75	1535.15	1109.73	1172.38	959.049	1065.85
SPEN	ENSG00000065526	23013	spen family transcriptional repressor [Source:HGNC Symbol;Acc:HGNC:17575]	protein_coding	2621.58	-0.535592	0.128951	-0.473656	0.135218	-4.15346	3.27482e-05	0.00560921	2956.59	3431.73	3160.08	1912.94	2441.08	2306.82	2141.81
THRAP3	ENSG00000054118	9967	thyroid hormone receptor associated protein 3 [Source:HGNC Symbol;Acc:HGNC:22964]	protein_coding	2074.14	-0.553901	0.144659	-0.477351	0.153777	-3.82901	0.000128658	0.0125108	2236.22	2838.2	2524.47	1683.97	2037	1523.25	1675.9
SPTBN1	ENSG00000115306	6711	spectrin beta, non-erythrocytic 1 [Source:HGNC Symbol;Acc:HGNC:11275]	protein_coding	1661.17	-0.575753	0.161983	-0.479984	0.175057	-3.55441	0.000378834	0.023365	1655.83	2419.23	2052.7	1179.99	1555.43	1453.88	1311.13
ANKRD10	ENSG00000088448	55608	ankyrin repeat domain 10 [Source:HGNC Symbol;Acc:HGNC:20265]	protein_coding	527.55	-0.609845	0.187036	-0.483214	0.207495	-3.26057	0.0011119	0.0435887	655.503	672.09	640.993	487.019	446.147	366.275	424.822
TJP1	ENSG00000104067	7082	tight junction protein 1 [Source:HGNC Symbol;Acc:HGNC:11827]	protein_coding	697.656	-0.588947	0.162195	-0.495542	0.1745	-3.6311	0.000282211	0.0201726	838.157	904.849	843.435	597.265	524.749	608.078	567.061
HECTD4	ENSG00000173064	283450	HECT domain E3 ubiquitin protein ligase 4 [Source:HGNC Symbol;Acc:HGNC:26611]	protein_coding	567.535	-0.639038	0.200637	-0.496006	0.225898	-3.18504	0.00144733	0.0496943	590.636	835.021	711.017	401.003	542.462	451.977	440.626
NPIPB4	ENSG00000185864	440345	nuclear pore complex interacting protein family member B4 [Source:HGNC Symbol;Acc:HGNC:41985]	protein_coding	1393.38	-0.577987	0.148591	-0.499501	0.157877	-3.88978	0.000100335	0.0108672	1495.37	1947.9	1702.13	1049.15	1156.88	1284.51	1117.69
CREBBP	ENSG00000005339	1387	CREB binding protein [Source:HGNC Symbol;Acc:HGNC:2348]	protein_coding	685.43	-0.607371	0.172687	-0.502701	0.187531	-3.51718	0.000436164	0.0250844	740.855	974.676	839.844	530.633	577.888	586.652	547.464
CHD8	ENSG00000100888	57680	chromodomain helicase DNA binding protein 8 [Source:HGNC Symbol;Acc:HGNC:20153]	protein_coding	1556.8	-0.572108	0.140197	-0.502948	0.147806	-4.08074	4.48927e-05	0.00657209	1749.72	2091.92	1897.84	1223.61	1203.38	1471.22	1259.93
FANCD2	ENSG00000144554	2177	FA complementation group D2 [Source:HGNC Symbol;Acc:HGNC:3585]	protein_coding	1258.96	-0.58337	0.148778	-0.505477	0.1579	-3.92109	8.81507e-05	0.00995206	1333.2	1780.6	1544.13	998.268	1105.96	1036.59	1014.01
MACF1	ENSG00000127603	23499	microtubule actin crosslinking factor 1 [Source:HGNC Symbol;Acc:HGNC:13664]	protein_coding	1127.63	-0.605192	0.168722	-0.505979	0.182594	-3.58692	0.000334603	0.022513	1171.03	1630.76	1398.24	829.871	1093.78	881.509	888.206
CAD	ENSG00000084774	790	carbamoyl-phosphate synthetase 2, aspartate transcarbamylase, and dihydroorotase [Source:HGNC Symbol;Acc:HGNC:1424]	protein_coding	1274.65	-0.582203	0.146024	-0.50782	0.154571	-3.98704	6.69034e-05	0.00840837	1363.93	1793.7	1556.25	1010.38	1091.57	1079.44	1027.28
PRKDC	ENSG00000253729	5591	protein kinase, DNA-activated, catalytic subunit [Source:HGNC Symbol;Acc:HGNC:9413]	protein_coding	4134.31	-0.624902	0.183388	-0.508078	0.202034	-3.40755	0.000655484	0.0325073	3878.4	6300.48	5308.84	2886.98	4586.57	2886.33	3092.6
GOLGA8A	ENSG00000175265	23015	golgin A8 family member A [Source:HGNC Symbol;Acc:HGNC:31972]	protein_coding	1264.68	-0.612614	0.171599	-0.50998	0.18611	-3.57003	0.000356939	0.0228977	1201.76	1933.35	1586.32	1044.3	1117.03	982.515	987.458
TTC28	ENSG00000100154	23331	tetratricopeptide repeat domain 28 [Source:HGNC Symbol;Acc:HGNC:29179]	protein_coding	433.46	-0.637463	0.191205	-0.510625	0.21148	-3.33392	0.000856325	0.0376501	559.909	546.982	525.183	330.737	383.044	343.829	344.535
NPIPA7	ENSG00000214967	101059938	nuclear pore complex interacting protein family member A7 [Source:HGNC Symbol;Acc:HGNC:41982]	protein_coding	432.389	-0.647613	0.198095	-0.512193	0.220904	-3.26921	0.00107848	0.0432758	604.292	498.976	531.019	313.776	366.438	368.315	343.903
EP400	ENSG00000183495	57634	E1A binding protein p400 [Source:HGNC Symbol;Acc:HGNC:11958]	protein_coding	709.046	-0.615137	0.172387	-0.512685	0.1868	-3.56836	0.000359227	0.0228977	769.875	1009.59	870.368	545.171	631.027	573.389	563.9
AGO1	ENSG00000092847	26523	argonaute RISC component 1 [Source:HGNC Symbol;Acc:HGNC:3262]	protein_coding	725.318	-0.655754	0.202146	-0.513741	0.226867	-3.24396	0.00117881	0.0449976	781.824	1041.59	921.539	490.654	766.089	522.375	553.153
AHNAK	ENSG00000124942	79026	AHNAK nucleoprotein [Source:HGNC Symbol;Acc:HGNC:347]	protein_coding	993.365	-0.641726	0.190217	-0.516537	0.210266	-3.37365	0.000741789	0.0347962	1002.03	1483.84	1256.4	671.166	1008.54	772.34	759.242
VPS53	ENSG00000141252	55275	VPS53 subunit of GARP complex [Source:HGNC Symbol;Acc:HGNC:25608]	protein_coding	436.222	-0.656422	0.200496	-0.520156	0.223744	-3.27399	0.0010604	0.0426787	542.839	570.258	539.547	296.815	399.65	361.174	343.271
SRRM2	ENSG00000167978	23524	serine/arginine repetitive matrix 2 [Source:HGNC Symbol;Acc:HGNC:16639]	protein_coding	4634.18	-0.609051	0.161174	-0.520437	0.172818	-3.77885	0.000157554	0.0140519	4597.06	6850.37	5830.88	3055.38	4691.74	3851.5	3562.31
MDN1	ENSG00000112159	23195	midasin AAA ATPase 1 [Source:HGNC Symbol;Acc:HGNC:18302]	protein_coding	1048.32	-0.614247	0.162594	-0.525192	0.174172	-3.7778	0.000158218	0.0140519	1083.97	1533.3	1299.49	814.122	849.118	929.461	828.782
ZCCHC14	ENSG00000140948	23174	zinc finger CCHC-type containing 14 [Source:HGNC Symbol;Acc:HGNC:24134]	protein_coding	669.016	-0.645602	0.184692	-0.530579	0.201945	-3.49556	0.000473074	0.0261506	708.422	977.586	838.946	484.596	540.247	611.138	522.177
RNF213	ENSG00000173821	57674	ring finger protein 213 [Source:HGNC Symbol;Acc:HGNC:14539]	protein_coding	1270.39	-0.64623	0.184351	-0.532114	0.201684	-3.50544	0.000455855	0.0258236	1145.42	2036.64	1609.66	1009.17	1122.56	1003.94	965.332
HCFC1	ENSG00000172534	3054	host cell factor C1 [Source:HGNC Symbol;Acc:HGNC:4839]	protein_coding	1014.89	-0.646697	0.180775	-0.537003	0.196612	-3.57737	0.000347074	0.0228977	1194.93	1366	1269.42	766.873	663.132	1063.12	780.736
SLC41A1	ENSG00000133065	254428	solute carrier family 41 member 1 [Source:HGNC Symbol;Acc:HGNC:19429]	protein_coding	914.115	-0.643826	0.173658	-0.544016	0.187253	-3.70743	0.00020937	0.0176341	1087.38	1214.71	1146.87	609.38	716.271	911.096	713.094
SNRNP200	ENSG00000144028	23020	small nuclear ribonucleoprotein U5 subunit 200 [Source:HGNC Symbol;Acc:HGNC:30859]	protein_coding	3003.72	-0.60535	0.138164	-0.546029	0.144744	-4.38138	1.17929e-05	0.0030504	3096.57	4393.32	3700.52	2453.27	2693.49	2306.82	2382.04
UBP1	ENSG00000153560	7342	upstream binding protein 1 [Source:HGNC Symbol;Acc:HGNC:12507]	protein_coding	1282.87	-0.6238	0.152213	-0.547461	0.160974	-4.09819	4.16388e-05	0.00630715	1444.16	1776.24	1588.57	964.346	970.896	1221.26	1014.64
MTR	ENSG00000116984	4548	5-methyltetrahydrofolate-homocysteine methyltransferase [Source:HGNC Symbol;Acc:HGNC:7468]	protein_coding	1311	-0.652516	0.177435	-0.549349	0.191935	-3.67748	0.000235546	0.0184766	1220.53	2074.46	1661.28	1000.69	1088.24	1130.45	1001.37
MLXIP	ENSG00000175727	22877	MLX interacting protein [Source:HGNC Symbol;Acc:HGNC:17055]	protein_coding	774.951	-0.650054	0.173997	-0.551273	0.18733	-3.73601	0.000186961	0.0158643	867.176	1093.96	968.222	558.497	600.029	730.509	606.256
GXYLT1	ENSG00000151233	283464	glucoside xylosyltransferase 1 [Source:HGNC Symbol;Acc:HGNC:27482]	protein_coding	522.398	-0.668411	0.182831	-0.560781	0.197888	-3.6559	0.000256286	0.0194326	650.382	695.366	640.544	467.635	412.935	376.478	413.443
RPRD2	ENSG00000163125	23248	regulation of nuclear pre-mRNA domain containing 2 [Source:HGNC Symbol;Acc:HGNC:29039]	protein_coding	777.192	-0.660993	0.175553	-0.561931	0.188861	-3.76521	0.00016641	0.0144896	1056.66	926.67	965.529	518.518	742.84	621.341	608.785
AASS	ENSG00000008311	10157	aminoadipate-semialdehyde synthase [Source:HGNC Symbol;Acc:HGNC:17366]	protein_coding	391.298	-0.715797	0.216272	-0.566566	0.242362	-3.3097	0.000933958	0.0396027	484.799	533.89	491.069	347.698	244.661	336.687	300.283
COL4A2	ENSG00000134871	1284	collagen type IV alpha 2 chain [Source:HGNC Symbol;Acc:HGNC:2203]	protein_coding	705.634	-0.66198	0.168007	-0.572798	0.179111	-3.9402	8.14141e-05	0.00943129	814.258	984.859	878.896	533.056	626.599	544.821	556.946
MYH10	ENSG00000133026	4628	myosin heavy chain 10 [Source:HGNC Symbol;Acc:HGNC:7568]	protein_coding	2052.15	-0.650038	0.148361	-0.580687	0.155837	-4.38148	1.17878e-05	0.0030504	2109.9	3073.87	2572.05	1549.5	1814.48	1647.73	1597.51
PPARA	ENSG00000186951	5465	peroxisome proliferator activated receptor alpha [Source:HGNC Symbol;Acc:HGNC:9232]	protein_coding	391.828	-0.742391	0.222868	-0.588541	0.250064	-3.33107	0.000865121	0.0377558	421.639	600.808	501.393	268.951	356.475	298.938	294.594
DHX8	ENSG00000067596	1659	DEAH-box helicase 8 [Source:HGNC Symbol;Acc:HGNC:2749]	protein_coding	1043.2	-0.68899	0.174247	-0.595639	0.18611	-3.95411	7.682e-05	0.00897716	1112.99	1556.57	1321.04	990.999	793.765	725.408	801.598
FYCO1	ENSG00000163820	79443	FYVE and coiled-coil domain autophagy adaptor 1 [Source:HGNC Symbol;Acc:HGNC:14673]	protein_coding	411.01	-0.750342	0.222543	-0.599059	0.248738	-3.37167	0.000747152	0.0348472	419.932	658.997	522.49	295.604	324.37	350.971	304.708
TRIO	ENSG00000038382	7204	trio Rho guanine nucleotide exchange factor [Source:HGNC Symbol;Acc:HGNC:12303]	protein_coding	474.053	-0.764758	0.228792	-0.606296	0.257298	-3.34259	0.000830004	0.0368963	459.194	776.831	619.447	308.93	391.901	416.268	345.8
NPIPB12	ENSG00000169203	440353	nuclear pore complex interacting protein family member B12 [Source:HGNC Symbol;Acc:HGNC:37491]	protein_coding	743.25	-0.70472	0.179187	-0.607823	0.191694	-3.93287	8.39385e-05	0.00955751	812.551	1105.6	939.494	510.037	632.134	634.605	568.326
HDAC6	ENSG00000094631	10013	histone deacetylase 6 [Source:HGNC Symbol;Acc:HGNC:14064]	protein_coding	646.26	-0.763056	0.223823	-0.613651	0.249846	-3.40919	0.000651564	0.0325073	790.36	887.392	851.515	367.082	709.628	446.876	470.971
ZNF142	ENSG00000115568	7701	zinc finger protein 142 [Source:HGNC Symbol;Acc:HGNC:12927]	protein_coding	489.978	-0.725257	0.192235	-0.615073	0.207475	-3.77277	0.000161446	0.0142436	706.715	580.441	610.02	339.217	396.329	420.349	376.776
DYNC1H1	ENSG00000197102	1778	dynein cytoplasmic 1 heavy chain 1 [Source:HGNC Symbol;Acc:HGNC:2961]	protein_coding	4049.05	-0.699562	0.154007	-0.62893	0.161395	-4.54242	5.56122e-06	0.002124	4195.9	6159.37	5186.75	2708.89	3874.73	3161.8	3055.94
TNKS1BP1	ENSG00000149115	85456	tankyrase 1 binding protein 1 [Source:HGNC Symbol;Acc:HGNC:19081]	protein_coding	455.102	-0.8153	0.228394	-0.670329	0.251785	-3.56971	0.000357379	0.0228977	435.295	779.741	592.963	364.659	350.939	334.647	327.467
ZBTB7A	ENSG00000178951	51341	zinc finger and BTB domain containing 7A [Source:HGNC Symbol;Acc:HGNC:18078]	protein_coding	346.566	-0.827109	0.217797	-0.700505	0.235926	-3.79762	0.000146092	0.0135155	443.83	491.702	448.426	242.298	304.443	236.701	258.56
FLNB	ENSG00000136068	2317	filamin B [Source:HGNC Symbol;Acc:HGNC:3755]	protein_coding	1557.07	-0.793941	0.181467	-0.705984	0.191687	-4.37514	1.21357e-05	0.0030504	1601.2	2502.15	2046.87	986.153	1481.25	1155.96	1125.9
ZNF821	ENSG00000102984	55565	zinc finger protein 821 [Source:HGNC Symbol;Acc:HGNC:28043]	protein_coding	198.44	-0.945981	0.276705	-0.755221	0.311717	-3.41873	0.000629146	0.0316282	290.197	267.672	262.592	130.841	123.991	173.445	140.343
MPP3	ENSG00000161647	4356	membrane palmitoylated protein 3 [Source:HGNC Symbol;Acc:HGNC:7221]	protein_coding	289.7	-0.994852	0.307683	-0.758782	0.359261	-3.23337	0.0012234	0.0456529	454.073	356.411	401.294	255.624	108.492	264.249	187.756
LRRC37A2	ENSG00000238083	474170	leucine rich repeat containing 37 member A2 [Source:HGNC Symbol;Acc:HGNC:32404]	protein_coding	434.137	-0.94133	0.255989	-0.782509	0.28153	-3.67723	0.000235777	0.0184766	464.315	734.644	589.821	399.792	343.19	213.235	293.961
FAM160B2	ENSG00000158863	64760	family with sequence similarity 160 member B2 [Source:HGNC Symbol;Acc:HGNC:16492]	protein_coding	265.488	-0.945956	0.259757	-0.782755	0.286114	-3.64169	0.000270855	0.0200462	341.408	401.508	353.713	168.397	247.982	160.182	185.227
ZBTB47	ENSG00000114853	92999	zinc finger and BTB domain containing 47 [Source:HGNC Symbol;Acc:HGNC:26955]	protein_coding	200.168	-1.02756	0.308604	-0.802468	0.354254	-3.32969	0.000869419	0.0377558	230.45	336.045	279.2	128.418	105.171	189.769	132.125
KMT2D	ENSG00000167548	8085	lysine methyltransferase 2D [Source:HGNC Symbol;Acc:HGNC:7133]	protein_coding	759.291	-0.875261	0.175526	-0.802967	0.182527	-4.9865	6.14828e-07	0.00052921	850.106	1224.89	999.195	550.017	566.817	573.389	550.625
RPS17	ENSG00000182774	6218	ribosomal protein S17 [Source:HGNC Symbol;Acc:HGNC:10397]	protein_coding	222.607	-1.00061	0.271958	-0.831421	0.299028	-3.67929	0.000233882	0.0184766	349.943	286.584	297.604	175.666	173.809	120.391	154.251
DENND3	ENSG00000105339	22898	DENN domain containing 3 [Source:HGNC Symbol;Acc:HGNC:29134]	protein_coding	135.691	-1.06433	0.312827	-0.844354	0.35465	-3.4023	0.000668224	0.0326193	201.431	197.845	180.448	94.4963	91.8864	90.8035	92.9298
WDR27	ENSG00000184465	253769	WD repeat domain 27 [Source:HGNC Symbol;Acc:HGNC:21248]	protein_coding	347.332	-1.004	0.25898	-0.854406	0.281017	-3.87677	0.000105854	0.0111039	339.701	638.631	478.949	233.818	287.837	220.377	232.008
NPIPB13	ENSG00000198064	613037	nuclear pore complex interacting protein family, member B13 [Source:HGNC Symbol;Acc:HGNC:41989]	protein_coding	532.759	-0.989759	0.238377	-0.861771	0.255041	-4.15207	3.29484e-05	0.00560921	537.718	949.946	739.296	284.7	440.612	422.39	354.65
HOXD10	ENSG00000128710	3236	homeobox D10 [Source:HGNC Symbol;Acc:HGNC:5133]	protein_coding	403.679	-1.00511	0.237686	-0.882105	0.253198	-4.22872	2.3502e-05	0.00466715	508.698	634.267	552.116	379.197	221.413	255.066	274.996
CTNND1	ENSG00000198561	1500	catenin delta 1 [Source:HGNC Symbol;Acc:HGNC:2515]	protein_coding	112.892	-1.20954	0.365642	-0.938579	0.423354	-3.30798	0.00093972	0.0396169	168.997	176.024	155.311	71.4779	95.2075	53.0538	70.1714
KIAA1671	ENSG00000197077	85379	KIAA1671 [Source:HGNC Symbol;Acc:HGNC:29345]	protein_coding	498.474	-1.01109	0.18692	-0.939343	0.193061	-5.40925	6.32893e-08	0.000105392	776.703	658.997	663.437	316.199	357.582	369.336	347.064
PPFIA4	ENSG00000143847	8497	PTPRF interacting protein alpha 4 [Source:HGNC Symbol;Acc:HGNC:9248]	protein_coding	105.669	-1.25219	0.386524	-0.949914	0.455445	-3.23963	0.00119685	0.0451603	117.786	202.209	153.515	69.055	52.032	80.6009	64.4819
ZNF555	ENSG00000186300	148254	zinc finger protein 555 [Source:HGNC Symbol;Acc:HGNC:28382]	protein_coding	138.762	-1.17528	0.32801	-0.959872	0.365485	-3.58306	0.000339586	0.0226198	242.4	174.569	193.465	106.611	86.351	77.5401	90.4011
MYO15B	ENSG00000266714	80022	myosin XVB [Source:HGNC Symbol;Acc:HGNC:14083]	protein_coding	109.23	-1.37093	0.430214	-1.01759	0.518749	-3.18663	0.00143941	0.0496392	117.786	218.211	166.532	104.188	58.6744	39.7903	59.4245
COL3A1	ENSG00000168542	1281	collagen type III alpha 1 chain [Source:HGNC Symbol;Acc:HGNC:2201]	protein_coding	152.69	-1.40489	0.333721	-1.22894	0.356655	-4.20978	2.5562e-05	0.0047963	225.329	256.034	229.375	64.209	81.9228	123.452	88.5045
NPIPB11	ENSG00000254206	728888	nuclear pore complex interacting protein family member B11 [Source:HGNC Symbol;Acc:HGNC:37453]	protein_coding	361.236	-1.51316	0.381703	-1.28648	0.417652	-3.96424	7.36301e-05	0.00883953	237.279	896.12	579.946	302.873	112.921	232.62	166.894
COL5A1	ENSG00000130635	1289	collagen type V alpha 1 chain [Source:HGNC Symbol;Acc:HGNC:2209]	protein_coding	167.45	-1.70766	0.34817	-1.55615	0.364028	-4.90469	9.35762e-07	0.000733307	305.56	257.489	268.876	49.6711	125.098	82.6414	82.815
					825.353
					MEDIAN
