# Supplementary material for: Mutation at the Site of Hydroxylation in the Ribosomal Protein uL15 (RPL27a) Causes Specific Changes in the Repertoire of mRNAs Translated in Mammalian Cells
Source: Int J Mol Sci. 2023 Mar 24;24(7):6173. doi: 10.3390/ijms24076173 (PMC10094517; doi:10.3390/ijms24076173)
Supplement: Supplementary file 1 [file ijms-24-06173-s001.zip › Table S5.xlsx]

## Sheet: Лист1
tDEGs up	mRNA length		tDEGs down	mRNA length		all genes, baseMean>100	mRNA length		pDEGs up	mRNA length		pDEGs down	mRNA length		all genes, baseMean>100	mRNA length
ACOT8	1154		ABCB1	5205		AAAS	1815		RPA2	1584		MDN1	18485		AAAS	1815
ATG101	1433		ABHD3	2029		AACS	3256		ATP5F1E	3610		AASS	5825		AACS	3256
ATOX1	471		ACTN1	3722		AADAT	2250		ATP5MC3	2587		ACTN4	4990		AADAT	2250
ATP5F1E	3610		AFF4	9536		AAGAB	3132		COMMD6	1669		AGO1	13712		AAGAB	3132
ATP5MC3	2587		AHDC1	6428		AAK1	21157		EDF1	662		AHNAK	18761		AAK1	21157
ATP5ME	303		ALDH9A1	2395		AAMDC	522		EEF1B2	880		ANKRD10	2495		AAMDC	522
ATP5MK	660		ANKRD28	7744		AAMP	1760		PSMA7	962		ARHGAP35	9290		AAMP	1760
ATP6V1E1	1333		AP2A2	N/A		AAR2	2417		RPL10A	718		CAD	7286		AAR2	2417
ATP6V1G1	1563		APEX2	3239		AARS1	3437		RPL24	560		CHD8	8467		AARS1	3437
BRK1	1150		ASAP1	6259		AARS2	4798		RPL27	505		CLTC	8369		AARS2	4798
CBX3	2061		ASB13	2717		AASDH	3581		RPL31	1291		COL3A1	5490		AASDH	3581
CEP83	3686		ATRIP	4576		AASDHPPT	2767		RPL32	2094		COL4A2	6446		AASDHPPT	2767
CHRAC1	2481		BCAS3	3517		AASS	5825		RPL35	452		COL5A1	8442		AASS	5825
COMMD4	895		BLOC1S5	2659		AATF	2141		RPL37	7573		CREBBP	10790		AATF	2141
COMMD6	1669		BMS1	7759		ABCA2	8103		RPL37A	2992		CREBZF	7140		ABCA2	8103
COX18	6824		BRD3	5661		ABCA3	6602		RPL39	390		CTNND1	6670		ABCA3	6602
COX5B	690		BRI3BP	6703		ABCA5	8252		RPL41	676		DCAF16	4547		ABCA5	8252
COX7C	629		BUB1B	3669		ABCA7	6815		RPL7	1233		DENND3	5527		ABCA7	6815
DYNC2LI1	1399		CARNMT1	4259		ABCB1	5205		RPS12	503		DHX8	5549		ABCB1	5205
DYRK4	2065		CCND1	4238		ABCB10	3869		RPS13	527		DIAPH1	5735		ABCB10	3869
EDF1	662		CENPL	2706		ABCB7	4592		RPS14	2146		DNMT1	5274		ABCB7	4592
EEF1B2	880		CLDN12	3533		ABCB8	4656		RPS16	631		DYNC1H1	19940		ABCB8	4656
EXTL2	2825		CLUH	5357		ABCB9	3484		RPS19BP1	820		EIF4G1	5405		ABCB9	3484
FAM102B	5584		COL5A2	6829		ABCC1	6518		RPS20	519		EP400	12289		ABCC1	6518
FAM229B	2551		CPVL	2087		ABCC10	5043		RPS21	358		FANCD2	5096		ABCC10	5043
FAU	506		CTPS2	3953		ABCC4	5855		RPS23	3252		FLNB	9441		ABCC4	5855
FSD1	1833		CTTNBP2	5904		ABCC5	5790		RPS25	483		FYCO1	8514		ABCC5	5790
GAS2L3	5736		DDX31	4159		ABCC6	5753		RPS29	295		GOLGA8A	5777		ABCC6	5753
GGPS1	2895		DNAJB4	2903		ABCD1	3669		RPS3A	869		GPATCH8	6832		ABCD3	3604
GNB4	6315		DNAJC13	7754		ABCD3	3604		RPS5	741		GXYLT1	7492		ABCD4	3035
GPC6	7121		DOCK7	7233		ABCD4	3035		RPS7	732		HCFC1	8876		ABCE1	3887
H2BC11	480		ERBB3	5615		ABCE1	3887		TPGS1	1114		HDAC6	4118		ABCF1	3381
HEY2	2626		FADS1	4364		ABCF1	3381		ALG3	1552		HECTD4	15752		ABCF2	4527
HINT1	852		FAM171B	5731		ABCF2	4527		ATP5MC1	646		HOXD10	1785		ABCF3	2446
HPS6	2688		FAM193B	2968		ABCF3	2446		ATP5MC2	632		HUWE1	14731		ABHD10	2604
HRAS	1151		FKBP9	3424		ABHD10	2604		ATP6V0B	987		KIAA0319L	4777		ABHD11	1418
HSBP1	8649		FLCN	3667		ABHD11	1418		ATP6V0E1	1419		KIAA1671	10732		ABHD12	1960
IFITM1	668		FNTB	2711		ABHD12	1960		ATP6V1F	678		KMT2D	20635		ABHD13	5313
ITGB3BP	961		FOXRED2	4906		ABHD13	5313		ATRAID	1227		LRRC37A2	5177		ABHD14A	1066
KLHL2	3185		GRIPAP1	3031		ABHD14B	1657		BCAP31	1284		MACF1	24340		ABHD14B	1657
LAMTOR5	620		GVQW3	5444		ABHD15	3492		BCDIN3D	3226		MAP4	9232		ABHD15	3492
LSM3	3359		HECTD1	9445		ABHD17A	1706		BOLA2B	375		MKI67	12716		ABHD17A	1706
MBIP	1603		HLCS	8273		ABHD17B	3065		BPHL	1909		MLXIP	5472		ABHD17B	3065
MCTS1	1130		HOOK1	5713		ABHD17C	2361		CD151	1545		MPP3	2790		ABHD17C	2361
MPG	1036		IKZF5	4532		ABHD18	5753		CD320	1253		MSI2	6379		ABHD18	5753
MROH8	3413		KANK1	5070		ABHD2	8424		CDK1	1889		MTOR	8721		ABHD2	8424
MRPL27	686		KANSL1	5309		ABHD3	2029		CDKN2A	978		MTR	10547		ABHD3	2029
MRPL47	1354		KIF13A	6007		ABHD4	3051		CENPB	2890		MYH10	7707		ABHD4	3051
MRPL57	2233		KIF1A	9131		ABHD5	5298		CKS2	616		MYO15B	9914		ABHD5	5298
MRPS14	2115		KIFAP3	2954		ABHD6	2198		CLIC1	1560		NPIPA7	N/A		ABHD6	2198
MRPS21	1085		KLHL9	5740		ABI1	3515		CLTB	1139		NPIPB11	6369		ABI1	3515
MSRB1	1277		LINS1	4755		ABI2	6567		COMMD8	1461		NPIPB12	1216		ABI2	6567
NDUFA1	421		LRRC37A	5183		ABITRAM	1901		COQ2	1525		NPIPB13	6292		ABITRAM	1901
NDUFA3	353		MAP2K6	13405		ABL1	5578		COX6B1	488		NPIPB4	N/A		ABL1	5578
NDUFA4	2035		MARS1	2797		ABL2	12217		COX7A2L	2282		OGT	5435		ABL2	12217
NDUFB9	691		MBD5	10732		ABLIM1	7560		CUTA	937		PABPC4	3142		ABLIM1	7560
NDUFS5	495		MDN1	18485		ABR	5288		CYB561D2	1142		POGZ	6655		ABR	5288
ORC4	6547		MED14	7996		ABRACL	782		CYC1	1191		PPARA	10118		ABRACL	782
PDCD5	603		MED7	2071		ABRAXAS1	4210		DAD1	684		PPFIA4	6508		ABRAXAS1	4210
PDE9A	2192		MFHAS1	6399		ABRAXAS2	2955		DCXR	852		PRKDC	13459		ABRAXAS2	2955
PFDN4	1230		MFN1	5212		ABT1	2943		DDX39A	1498		RBM5	3177		ABT1	2943
PHPT1	577		MOGS	2867		ABTB2	4905		DEF8	3620		RNF213	21079		ACAA1	1699
PIGW	2312		MPP2	4202		ACAA1	1699		DHRS4	1264		RPRD2	8186		ACAA2	2926
PIN4	1239		MYBL1	5161		ACAA2	2926		DRAM2	2098		RPS17	1909		ACACA	9962
POC1B	3024		NAA25	5771		ACACA	9962		ECH1	1200		RRBP1	5049		ACACB	9368
POMP	1338		NBPF1	5932		ACACB	9368		ECI2	1368		SLC41A1	5017		ACAD10	4006
PPIL3	1166		NBPF10	13030		ACAD10	4006		EEF1A1	3512		SLC7A1	7343		ACAD8	2176
PRDM5	5207		NBPF11	5423		ACAD8	2176		EEF1D	2378		SMARCC1	6354		ACAD9	2445
PSMA7	962		NCS1	5164		ACAD9	2445		EIF3K	772		SNRNP200	7194		ACADM	2261
PSMB7	984		NDUFB8	678		ACADM	2261		EIF3L	2669		SPEN	12385		ACADS	1859
PTRHD1	1120		NSUN3	6431		ACADS	1859		EIF6	1069		SPTAN1	7875		ACADSB	5848
RASA1	4746		NTN1	5986		ACADSB	5848		EIPR1	1657		SPTBN1	10211		ACADVL	2184
RB1	4768		OSBP	4713		ACADVL	2184		ERAL1	1841		SRRM2	9044		ACAP2	7093
RBX1	1169		PDP2	6997		ACAP2	7093		ESD	1121		THRAP3	4405		ACAP3	3793
RPL10A	718		PHACTR4	6048		ACAP3	3793		FAR2	3538		TJP1	7230		ACAT1	1537
RPL21	566		PMEPA1	4954		ACAT1	1537		FARSA	1811		TNKS1BP1	5820		ACAT2	1520
RPL24	560		POLR2J3	N/A		ACAT2	1520		FDFT1	2035		TRIO	11460		ACBD3	3584
RPL27	505		PRKAG2	3279		ACBD3	3584		FIS1	870		TTC28	11770		ACBD4	1827
RPL31	1291		PRMT9	3461		ACBD4	1827		FRG1	978		UBP1	4175		ACBD5	3903
RPL32	2094		PUDP	2103		ACBD5	3903		GALK1	1397		VPS53	13089		ACBD6	1293
RPL35	452		RAB8A	2567		ACBD6	1293		GCAT	1473		WDR27	3554		ACBD7	3370
RPL37	7573		RARS2	2242		ACBD7	3370		GFUS	1362		ZBTB47	5494		ACD	1511
RPL37A	2992		RASL11A	2542		ACD	1511		GHITM	2382		ZBTB7A	6437		ACER3	7333
RPL38	1145		RECQL5	3669		ACER3	7333		GNG5	806		ZCCHC14	8079		ACIN1	4460
RPL39	390		RETREG1	3208		ACIN1	4460		GPX1	899		ZNF142	11290		ACLY	4293
RPL41	676		RIC8A	3506		ACLY	4293		GSTZ1	1186		ZNF555	8504		ACO1	7443
RPL7	1233		RNF8	5616		ACO1	7443		GTPBP6	1875		ZNF592	8187		ACO2	2734
RPS12	503		RPA2	1584		ACO2	2734		GUK1	1100		ZNF821	1987		ACOT1	1686
RPS13	527		RSF1	11242		ACOT1	1686		HIGD2A	654		FAM160B2	N/A		ACOT13	4041
RPS14	2146		RTL10	6653		ACOT13	4041		HILPDA	1364			7212	MEDIAN	ACOT2	1622
RPS16	631		SCAMP2	2453		ACOT2	1622		HLA-F	1506					ACOT7	1806
RPS19BP1	820		SDHA	2693		ACOT7	1806		HSPBP1	1635					ACOT8	1154
RPS20	519		SEMA4F	6075		ACOT8	1154		ID2	1299					ACOT9	4318
RPS21	358		SF3B2	3272		ACOT9	4318		IGFBP2	1414					ACOX1	7317
RPS23	3252		SKI	6083		ACOX1	7317		ILVBL	2305					ACOX3	2872
RPS24	534		SLC18B1	2452		ACOX3	2872		INIP	4114					ACP1	1474
RPS25	483		SNAI2	2180		ACP1	1474		KLRG2	2158					ACP2	2111
RPS27	352		SNX27	6441		ACP2	2111		LCMT1	1352					ACP6	6956
RPS29	295		SPATA2	4043		ACP6	6956		LSM7	491					ACSF2	2177
RPS3A	869		SUPT20H	2923		ACSF2	2177		LY6E	1335					ACSF3	4095
RPS5	741		SUPV3L1	2477		ACSF3	4095		MACROD1	1257					ACSL1	3712
RPS7	732		TEX10	3077		ACSL1	3712		MAPKAPK3	2537					ACSL3	5577
SAP18	2708		TMEM43	3230		ACSL3	5577		MECR	2515					ACSL4	4891
SEM1	458		TMEM65	9038		ACSL4	4891		MGST2	740					ACSS1	3632
SFR1	1430		TOR1AIP2	8319		ACSL6	6535		MIF	939					ACSS2	2885
SFT2D1	1033		TRIM3	2838		ACSS1	3632		MPV17	1002					ACTA2	1349
SH3BGRL	1764		TUBGCP6	6066		ACSS2	2885		MRPL41	582					ACTB	1812
SKA2	2809		UNC119	1379		ACTA2	1349		MRPL44	1689					ACTG1	1919
SMIM26	490		USP12	4412		ACTB	1812		MT-CO2	N/A					ACTL6A	1854
SNRPE	1560		USPL1	4894		ACTG1	1919		MYDGF	990					ACTN1	3722
SNRPG	594		VCPIP1	9956		ACTL6A	1854		MZT2A	599					ACTN2	4872
SNX2	6479		WDR5	3157		ACTN1	3722		MZT2B	599					ACTN4	4990
SUB1	3449		WDR77	2456		ACTN2	4872		NCAPH2	3337					ACTR10	2408
SVIP	4479		ZDHHC5	4443		ACTN4	4990		NDUFA11	575					ACTR1A	2830
TAF1D	1632		ZDHHC7	3448		ACTR10	2408		NDUFB7	535					ACTR1B	2204
TCEAL9	1028		ZMYM3	5536		ACTR1A	2830		NDUFS7	758					ACTR2	3783
TEDC1	1920		ZNF100	5643		ACTR1B	2204		NLE1	5193					ACTR3	6589
THAP12	3490		ZNF333	4716		ACTR2	3783		NOA1	2218					ACTR3B	2213
TMEM128	1243		ZNF512	3531		ACTR3	6589		NOB1	1716					ACTR5	2547
TMEM258	578		ZNF605	9342		ACTR3B	2213		NOSIP	1232					ACTR6	1737
TOMM7	434		ZNF616	4356		ACTR5	2547		NPM3	910					ACTR8	3579
TPGS1	1114		ZNF830	2238		ACTR6	1737		NTHL1	1030					ACVR1	3332
TPRKB	664			4644.5	MEDIAN	ACTR8	3579		NUBP1	1231					ACVR1B	4531
TRAPPC6A	758					ACVR1	3332		NUDT1	658					ACVR2A	5214
TRIP4	2013					ACVR1B	4531		OST4	442					ACVR2B	11782
UQCC2	1284					ACVR2A	5214		OSTC	1062					ACYP1	580
UQCRB	8459					ACVR2B	11782		OXA1L	2806					ADA	1496
UROD	1193					ACYP1	580		OXLD1	637					ADAL	4268
USF3	13704					ADA	1496		PAFAH1B3	1054					ADAM10	11158
USP37	8022					ADAL	4268		PARK7	1127					ADAM11	4614
WDR61	1202					ADAM10	11158		PCNA	1276					ADAM15	2936
YPEL5	2136					ADAM11	4614		PDPN	2737					ADAM17	4391
ZNF75D	5611					ADAM15	2936		PEF1	1614					ADAM19	6481
	1233	MEDIAN				ADAM17	4391		PIN1	1009					ADAM22	9508
						ADAM19	6481		PHB	N/A					ADAM23	6334
						ADAM22	9508		PLAG1	7311					ADAM9	N/A
						ADAM23	6334		POLR1H	864					ADAMTS1	5183
						ADAM9	N/A		PPA1	1292					ADAMTS13	4934
						ADAMTS1	5183		PPP1CA	1421					ADAMTS2	6783
						ADAMTS13	4934		PPP1R35	963					ADAMTS7	5520
						ADAP2	2669		PRADC1	1090					ADAP2	2669
						ADAR	6610		PRDX5	860					ADAR	6610
						ADARB1	6902		PRELID1	1226					ADARB1	6902
						ADAT1	5757		PRMT1	1328					ADAT1	5757
						ADAT2	6244		PRPS1	2070					ADAT2	6244
						ADCK1	3268		PSMA6	1023					ADCK2	2574
						ADCK2	2574		PSMB2	4426					ADCY1	12657
						ADCY1	12657		PSMB4	918					ADCY3	4950
						ADCY3	4950		PSMB5	1044					ADCY6	6092
						ADCY6	6092		PSMD4	1319					ADCY7	6271
						ADCY7	6271		QARS1	2449					ADCY9	7980
						ADCY9	7980		RACK1	1140					ADCYAP1R1	6639
						ADCYAP1R1	6639		RAN	2474					ADD1	4140
						ADD1	4140		RBIS	887					ADD2	9290
						ADD2	9290		RNASEH2C	2645					ADD3	4413
						ADD3	4413		RPL10	2164					ADGRA2	6944
						ADGRA2	6944		RPL13	2187					ADGRA3	4577
						ADGRA3	4577		RPL13A	1127					ADGRB1	6020
						ADGRB1	6020		RPL15	2155					ADGRB2	5708
						ADGRB2	5708		RPL18	643					ADGRE5	3190
						ADGRE5	3190		RPL18A	634					ADGRG6	6822
						ADGRL1	7853		RPL19	737					ADGRL1	7853
						ADGRL2	7432		RPL23A	970					ADGRL2	7432
						ADGRL3	13738		RPL27A	4535					ADGRL3	13738
						ADGRV1	19557		RPL28	4209					ADGRV1	19557
						ADH5	2652		RPL29	754					ADH5	2652
						ADI1	N/A		RPL30	498					ADI1	N/A
						ADIPOR1	2091		RPL35A	1234					ADIPOR1	2091
						ADIPOR2	3971		RPL7A	887					ADIPOR2	3971
						ADK	1992		RPL8	1070					ADK	1992
						ADNP	6672		RPL9	724					ADM	1492
						ADNP2	5157		RPLP0	1105					ADNP	6672
						ADO	3760		RPLP1	1174					ADNP2	5157
						ADORA2B	1522		RPLP2	462					ADO	3760
						ADPGK	2608		RPS11	573					ADORA2B	1522
						ADPRM	1534		RPS15	501					ADPGK	2608
						ADPRS	1651		RPS19	2021					ADPRHL1	9722
						ADRA2C	2142		RPS2	945					ADPRM	1534
						ADRM1	1379		RPS27L	6110					ADPRS	1651
						ADSL	4359		RPS28	1330					ADRA2C	2142
						ADSS2	2555		RPS3	2059					ADRM1	1379
						AEBP2	5830		RPS9	711					ADSL	4359
						AEN	3072		RPSA	1140					ADSS1	1723
						AFAP1	7704		RSL24D1	1889					ADSS2	2555
						AFAP1L1	6024		SCO2	984					AEBP2	5830
						AFDN	7806		SERF2	2543					AEN	3072
						AFF1	9261		SIGIRR	1743					AFAP1	7704
						AFF4	9536		SIVA1	752					AFAP1L1	6024
						AFG1L	5048		SLC25A3	5984					AFDN	7806
						AFG3L2	3160		SLC25A5	1307					AFF1	9261
						AFMID	1686		SLC25A6	1451					AFF4	9536
						AFTPH	4098		SLC35B1	1615					AFG1L	5048
						AGA	2037		SNX29	8173					AFG3L2	3160
						AGAP1	10889		SRSF3	4228					AFMID	1686
						AGAP2	5430		SSR4	608					AFTPH	4098
						AGAP3	3494		STOML2	1365					AGA	2037
						AGAP4	2535		SVBP	807					AGAP1	10889
						AGAP9	2387		TBRG4	2226					AGAP2	5430
						AGBL5	3188		TIMM8B	780					AGAP3	3494
						AGFG1	8677		TK1	1431					AGAP4	2535
						AGFG2	4819		TMEM101	1525					AGAP9	2387
						AGGF1	4490		TMEM126A	759					AGBL5	3188
						AGK	N/A		TMEM141	839					AGFG1	8677
						AGL	7091		TMEM183A	3031					AGGF1	4490
						AGO1	13712		TMEM205	1256					AGK	N/A
						AGO2	14595		TMEM219	946					AGL	7091
						AGO3	19660		TMEM230	1541					AGO1	13712
						AGO4	7272		TMEM9	1994					AGO2	14595
						AGPAT1	2496		TMSB15A	634					AGO3	19660
						AGPAT2	1546		TPT1	4548					AGO4	7272
						AGPAT3	6565		TRAF3IP2	5833					AGPAT1	2496
						AGPAT4	7923		TRIM21	1935					AGPAT2	1546
						AGPAT5	5237		TSPO	836					AGPAT3	6565
						AGPS	7633		TSSC4	1472					AGPAT4	7923
						AGRN	7326		TTC38	2566					AGPAT5	5237
						AGTPBP1	4464		TXN	737					AGPS	7633
						AGTRAP	1130		TXNDC17	1917					AGRN	7326
						AHCTF1	8887		UBA52	2848					AGTPBP1	4464
						AHCY	2150		UBL5	407					AGTRAP	1130
						AHCYL1	3943		UBXN1	1134					AHCTF1	8887
						AHCYL2	5049		UQCC3	1927					AHCY	2150
						AHDC1	6428		USE1	845					AHCYL1	3943
						AHI1	6063		VIPAS39	2530					AHCYL2	5049
						AHNAK	18761		VPS28	1097					AHI1	6063
						AHNAK2	18335		VPS51	2661					AHNAK	18761
						AHSA1	1337		WARS2	2787					AHNAK2	18335
						AIDA	2975		YIF1A	1097					AHSA1	1337
						AIF1L	3374		YIF1B	2769					AIDA	2975
						AIFM1	2222		ZMAT5	945					AIF1L	3374
						AIFM2	3134			1232	MEDIAN				AIFM1	2222
						AIG1	2136								AIFM2	3134
						AIMP1	2773								AIG1	2136
						AIMP2	1198								AIMP1	2773
						AIP	1236								AIMP2	1198
						AJUBA	4168								AIP	1236
						AK2	5970								AJUBA	4168
						AK3	4219								AK2	5970
						AK4	6845								AK3	4219
						AK6	1648								AK4	6845
						AK7	3283								AK6	1648
						AKAP1	3909								AK7	3283
						AKAP10	4063								AKAP1	3909
						AKAP11	9915								AKAP10	4063
						AKAP12	8466								AKAP11	9915
						AKAP13	13327								AKAP12	8466
						AKAP17A	3199								AKAP13	13327
						AKAP5	6487								AKAP17A	3199
						AKAP8	3665								AKAP5	6487
						AKAP8L	2078								AKAP8	3665
						AKAP9	12476								AKAP8L	2078
						AKIP1	1273								AKAP9	12476
						AKIRIN1	2688								AKIP1	1273
						AKIRIN2	1898								AKIRIN1	2688
						AKR1A1	1407								AKIRIN2	1898
						AKR1B1	1361								AKR1A1	1407
						AKR7A2	1360								AKR1B1	1361
						AKT1	2957								AKR7A2	1360
						AKT1S1	1775								AKT1	2957
						AKT2	5250								AKT1S1	1775
						AKT3	N/A								AKT2	5250
						AKTIP	2384								AKT3	N/A
						ALAD	3129								AKTIP	2384
						ALAS1	2375								ALAD	3129
						ALCAM	4701								ALAS1	2375
						ALDH16A1	3099								ALCAM	4701
						ALDH18A1	3352								ALDH16A1	3099
						ALDH1A2	3386								ALDH18A1	3352
						ALDH1A3	3469								ALDH1A2	3386
						ALDH1B1	3028								ALDH1A3	3469
						ALDH1L2	7428								ALDH1B1	3028
						ALDH2	9561								ALDH1L2	7428
						ALDH3A2	3703								ALDH2	9561
						ALDH4A1	3139								ALDH3A2	3703
						ALDH5A1	5131								ALDH4A1	3139
						ALDH6A1	5462								ALDH5A1	5131
						ALDH7A1	4765								ALDH6A1	5462
						ALDH9A1	2395								ALDH7A1	4765
						ALDOA	1640								ALDH9A1	2395
						ALDOC	1608								ALDOA	1640
						ALG1	3900								ALDOC	1608
						ALG10	2913								ALG1	3900
						ALG10B	10050								ALG10	2913
						ALG11	6510								ALG10B	10050
						ALG12	5330								ALG11	6510
						ALG13	4113								ALG12	5330
						ALG14	9375								ALG13	4113
						ALG2	2808								ALG14	9375
						ALG3	1552								ALG2	2808
						ALG5	1219								ALG3	1552
						ALG6	3325								ALG5	1219
						ALG8	1637								ALG6	3325
						ALKBH1	2597								ALG8	1637
						ALKBH2	1180								ALG9	6158
						ALKBH3	1544								ALKBH1	2597
						ALKBH4	2092								ALKBH2	1180
						ALKBH5	3159								ALKBH3	1544
						ALKBH7	970								ALKBH4	2092
						ALKBH8	4067								ALKBH5	3159
						ALMS1	12844								ALKBH7	970
						ALPK1	5399								ALKBH8	4067
						ALPL	2536								ALMS1	12844
						ALS2	6675								ALPK1	5399
						ALX1	1332								ALPL	2536
						ALX4	5727								ALS2	6675
						ALYREF	1097								ALX1	1332
						AMBRA1	5249								ALX4	5727
						AMD1	3423								ALYREF	1097
						AMER1	8407								AMBRA1	5249
						AMFR	3607								AMD1	3423
						AMH	1809								AMER1	8407
						AMMECR1	5350								AMFR	3607
						AMMECR1L	4692								AMH	1809
						AMN1	1952								AMIGO1	5130
						AMOT	7613								AMMECR1	5350
						AMOTL1	8980								AMMECR1L	4692
						AMOTL2	4868								AMOT	7613
						AMPD2	4081								AMOTL1	8980
						AMZ2	1932								AMOTL2	4868
						ANAPC1	7762								AMPD2	4081
						ANAPC10	1444								AMZ2	1932
						ANAPC11	638								ANAPC1	7762
						ANAPC13	1170								ANAPC10	1444
						ANAPC15	801								ANAPC11	638
						ANAPC16	3231								ANAPC13	1170
						ANAPC2	2655								ANAPC15	801
						ANAPC4	2635								ANAPC16	3231
						ANAPC5	2574								ANAPC2	2655
						ANAPC7	3023								ANAPC4	2635
						ANGEL1	5287								ANAPC5	2574
						ANGEL2	4690								ANAPC7	3023
						ANK1	8292								ANG	748
						ANK2	14215								ANGEL1	5287
						ANK3	17019								ANGEL2	4690
						ANKFY1	7506								ANK1	8292
						ANKH	8207								ANK2	14215
						ANKIB1	6340								ANK3	17019
						ANKLE2	4590								ANKFY1	7506
						ANKMY1	3405								ANKH	8207
						ANKMY2	2489								ANKIB1	6340
						ANKRA2	2161								ANKLE2	4590
						ANKRD10	2495								ANKMY1	3405
						ANKRD11	9301								ANKMY2	2489
						ANKRD12	11284								ANKRA2	2161
						ANKRD13A	4241								ANKRD10	2495
						ANKRD13B	3550								ANKRD11	9301
						ANKRD13C	5658								ANKRD12	11284
						ANKRD13D	2128								ANKRD13A	4241
						ANKRD16	2734								ANKRD13B	3550
						ANKRD17	10797								ANKRD13C	5658
						ANKRD18A	3971								ANKRD13D	2128
						ANKRD18B	4160								ANKRD16	2734
						ANKRD26	6775								ANKRD17	10797
						ANKRD27	4432								ANKRD18A	3971
						ANKRD28	7744								ANKRD18B	4160
						ANKRD33B	9586								ANKRD26	6775
						ANKRD36	6534								ANKRD27	4432
						ANKRD36B	4453								ANKRD28	7744
						ANKRD36C	7501								ANKRD33B	9586
						ANKRD39	892								ANKRD36	6534
						ANKRD40	4166								ANKRD36B	4453
						ANKRD42	3310								ANKRD36C	7501
						ANKRD44	6087								ANKRD39	892
						ANKRD46	2649								ANKRD40	4166
						ANKRD49	1908								ANKRD42	3310
						ANKRD50	8798								ANKRD46	2649
						ANKRD52	8681								ANKRD49	1908
						ANKRD54	2087								ANKRD50	8798
						ANKRD6	5368								ANKRD52	8681
						ANKRD9	6705								ANKRD54	2087
						ANKS1A	6350								ANKRD6	5368
						ANKS3	2772								ANKRD9	6705
						ANKS6	7190								ANKS1A	6350
						ANKZF1	2540								ANKS3	2772
						ANLN	4731								ANKS6	7190
						ANO10	3155								ANKZF1	2540
						ANO5	6742								ANLN	4731
						ANO6	5998								ANO10	3155
						ANO8	4178								ANO5	6742
						ANP32A	2440								ANO6	5998
						ANP32B	1483								ANP32A	2440
						ANP32E	3407								ANP32B	1483
						ANTKMT	870								ANP32E	3407
						ANTXR1	5858								ANTKMT	870
						ANXA1	1401								ANTXR1	5858
						ANXA11	6734								ANXA1	1401
						ANXA2	1554								ANXA11	6734
						ANXA4	2651								ANXA2	1554
						ANXA5	1638								ANXA4	2651
						ANXA6	2889								ANXA5	1638
						ANXA7	2443								ANXA6	2889
						AOPEP	3130								ANXA7	2443
						AP1AR	5915								AOPEP	3130
						AP1B1	4165								AP1AR	5915
						AP1G1	6602								AP1B1	4165
						AP1G2	2598								AP1G1	6602
						AP1M1	12859								AP1G2	2598
						AP1S1	1226								AP1M1	12859
						AP1S2	2128								AP1S1	1226
						AP2A1	3357								AP1S2	2128
						AP2A2	N/A								AP2A1	3357
						AP2B1	5700								AP2A2	N/A
						AP2M1	1931								AP2B1	5700
						AP2S1	789								AP2M1	1931
						AP3B1	3980								AP2S1	789
						AP3D1	5065								AP3B1	3980
						AP3M1	4889								AP3D1	5065
						AP3M2	3494								AP3M1	4889
						AP3S1	1276								AP3M2	3494
						AP3S2	5543								AP3S1	1276
						AP4B1	3173								AP3S2	5543
						AP4E1	6743								AP4B1	3173
						AP4M1	3591								AP4E1	6743
						AP5B1	6980								AP4M1	3591
						AP5M1	11675								AP5B1	6980
						AP5S1	5372								AP5M1	11675
						AP5Z1	5529								AP5S1	5372
						APAF1	7201								AP5Z1	5529
						APBA2	3640								APAF1	7201
						APBA3	2176								APBA2	3640
						APBB1	2666								APBA3	2176
						APBB2	8899								APBB1	2666
						APBB3	2131								APBB2	8899
						APC	10704								APBB3	2131
						APEH	2879								APC	10704
						APEX1	1453								APEH	2879
						APEX2	3239								APEX1	1453
						APH1A	1730								APEX2	3239
						APH1B	4138								APH1A	1730
						API5	3726								APH1B	4138
						APIP	1246								API5	3726
						APLP1	2370								APIP	1246
						APLP2	3697								APLP1	2370
						APMAP	2202								APLP2	3697
						APOBEC3B	1590								APMAP	2202
						APOBEC3C	2644								APOBEC3B	1590
						APOBEC3F	4496								APOBEC3C	2644
						APOC1	514								APOBEC3F	4496
						APOE	1166								APOC1	514
						APOL2	2429								APOE	1166
						APOO	1122								APOL2	2429
						APOOL	6480								APOO	1122
						APP	3583								APOOL	6480
						APPBP2	6492								APP	3583
						APPL1	6069								APPBP2	6492
						APPL2	3171								APPL1	6069
						APRT	931								APPL2	3171
						APTX	1977								APRT	931
						AQR	9597								APTX	1977
						ARAF	2378								AQR	9597
						ARAP1	5156								ARAF	2378
						ARAP3	5258								ARAP1	5156
						ARCN1	3994								ARCN1	3994
						AREL1	5417								AREL1	5417
						ARF1	1840								ARF1	1840
						ARF3	4041								ARF3	4041
						ARF4	1596								ARF4	1596
						ARF5	1032								ARF5	1032
						ARF6	3875								ARF6	3875
						ARFGAP1	3250								ARFGAP1	3250
						ARFGAP2	2773								ARFGAP2	2773
						ARFGAP3	2728								ARFGAP3	2728
						ARFGEF1	7320								ARFGEF1	7320
						ARFGEF2	9031								ARFGEF2	9031
						ARFGEF3	14859								ARFGEF3	14859
						ARFIP1	3542								ARFIP1	3542
						ARFIP2	1763								ARFIP2	1763
						ARFRP1	2518								ARFRP1	2518
						ARG2	1911								ARG2	1911
						ARGLU1	3363								ARGLU1	3363
						ARHGAP1	3395								ARHGAP1	3395
						ARHGAP10	3270								ARHGAP10	3270
						ARHGAP11A	5898								ARHGAP11A	5898
						ARHGAP12	5060								ARHGAP12	5060
						ARHGAP17	3495								ARHGAP17	3495
						ARHGAP18	4414								ARHGAP18	4414
						ARHGAP19	5438								ARHGAP19	5438
						ARHGAP21	7381								ARHGAP21	7381
						ARHGAP22	2729								ARHGAP22	2729
						ARHGAP26	9226								ARHGAP26	9226
						ARHGAP27	4242								ARHGAP27	4242
						ARHGAP29	8952								ARHGAP29	8952
						ARHGAP31	9307								ARHGAP31	9307
						ARHGAP32	10280								ARHGAP32	10280
						ARHGAP35	9290								ARHGAP35	9290
						ARHGAP39	4830								ARHGAP39	4830
						ARHGAP42	8156								ARHGAP42	8156
						ARHGAP5	9589								ARHGAP44	4270
						ARHGDIA	1837								ARHGAP5	9589
						ARHGDIG	964								ARHGDIA	1837
						ARHGEF1	3229								ARHGDIG	964
						ARHGEF10L	4625								ARHGEF1	3229
						ARHGEF11	7261								ARHGEF10L	4625
						ARHGEF12	10326								ARHGEF11	7261
						ARHGEF17	8163								ARHGEF12	10326
						ARHGEF18	6681								ARHGEF17	8163
						ARHGEF2	4169								ARHGEF18	6681
						ARHGEF25	2554								ARHGEF2	4169
						ARHGEF26	3975								ARHGEF25	2554
						ARHGEF3	3582								ARHGEF26	3975
						ARHGEF39	3678								ARHGEF3	3582
						ARHGEF4	6735								ARHGEF39	3678
						ARHGEF40	5893								ARHGEF4	6735
						ARHGEF6	4860								ARHGEF40	5893
						ARHGEF7	5425								ARHGEF6	4860
						ARHGEF9	4702								ARHGEF7	5425
						ARID1A	8595								ARHGEF9	4702
						ARID1B	10310								ARID1A	8595
						ARID2	8598								ARID1B	10310
						ARID3A	5948								ARID2	8598
						ARID3B	4228								ARID3A	5948
						ARID4A	5864								ARID3B	4228
						ARID4B	6022								ARID4A	5864
						ARID5A	2181								ARID4B	6022
						ARID5B	7492								ARID5A	2181
						ARIH1	21679								ARID5B	7492
						ARIH2	4912								ARIH1	21679
						ARL1	3197								ARIH2	4912
						ARL10	10826								ARL1	3197
						ARL13B	3971								ARL10	10826
						ARL14EP	2373								ARL13B	3971
						ARL15	3328								ARL14EP	2373
						ARL16	1087								ARL15	3328
						ARL17A	5242								ARL16	1087
						ARL17B	731								ARL17A	5242
						ARL2	932								ARL17B	731
						ARL2BP	1969								ARL2	932
						ARL3	3834								ARL2BP	1969
						ARL4A	2889								ARL3	3834
						ARL4C	3866								ARL4A	2889
						ARL4D	1578								ARL4C	3866
						ARL5A	5264								ARL4D	1578
						ARL5B	7170								ARL5A	5264
						ARL6	3988								ARL5B	7170
						ARL6IP1	2278								ARL6	3988
						ARL6IP5	2134								ARL6IP1	2278
						ARL6IP6	3242								ARL6IP5	2134
						ARL8A	1789								ARL6IP6	3242
						ARL8B	2933								ARL8A	1789
						ARMC1	3000								ARL8B	2933
						ARMC10	N/A								ARMC1	3000
						ARMC5	3108								ARMC10	N/A
						ARMC6	2461								ARMC6	2461
						ARMC7	2151								ARMC7	2151
						ARMC8	4757								ARMC8	4757
						ARMC9	7879								ARMC9	7879
						ARMCX3	3348								ARMCX3	3348
						ARMCX5	2772								ARMCX5	2772
						ARMCX6	1840								ARMCX6	1840
						ARMH3	4099								ARMH3	4099
						ARMT1	2397								ARMH4	6495
						ARNT	4710								ARMT1	2397
						ARNT2	6523								ARNT	4710
						ARNTL	2787								ARNT2	6523
						ARNTL2	6902								ARNTL2	6902
						ARPC1A	1582								ARPC1A	1582
						ARPC2	1410								ARPC2	1410
						ARPC3	946								ARPC3	946
						ARPC4	1433								ARPC4	1433
						ARPC5	7266								ARPC5	7266
						ARPC5L	2507								ARPC5L	2507
						ARPIN	7587								ARPIN	7587
						ARPP19	5366								ARPP19	5366
						ARRB1	7352								ARRB1	7352
						ARRB2	1778								ARRB2	1778
						ARRDC1	1556								ARRDC1	1556
						ARRDC2	2501								ARRDC2	2501
						ARRDC3	4239								ARRDC3	4239
						ARRDC4	4062								ARRDC4	4062
						ARSA	4294								ARSA	4294
						ARSB	4852								ARSB	4852
						ARSK	3365								ARSK	3365
						ARV1	1428								ARV1	1428
						ARVCF	4056								ARVCF	4056
						ASAH1	2779								ASAH1	2779
						ASAH2	4955								ASAH2	4955
						ASAH2B	5145								ASAH2B	5145
						ASAP1	6259								ASAP1	6259
						ASAP2	5665								ASAP2	5665
						ASAP3	4051								ASAP3	4051
						ASB1	6891								ASB1	6891
						ASB13	2717								ASB13	2717
						ASB3	2226								ASB3	2226
						ASB6	4603								ASB6	4603
						ASB7	4926								ASB7	4926
						ASB8	2534								ASB8	2534
						ASCC1	2479								ASCC1	2479
						ASCC2	2790								ASCC2	2790
						ASCC3	8111								ASCC3	8111
						ASF1A	2434								ASF1A	2434
						ASF1B	1689								ASF1B	1689
						ASH1L	12037								ASH1L	12037
						ASH2L	2918								ASH2L	2918
						ASIC1	3886								ASIC1	3886
						ASL	2140								ASL	2140
						ASMTL	2065								ASMTL	2065
						ASNS	2385								ASNSD1	2411
						ASNSD1	2411								ASPH	5301
						ASPH	5301								ASPHD2	3370
						ASPHD2	3370								ASPM	10863
						ASPM	10863								ASPSCR1	1764
						ASPSCR1	1764								ASRGL1	2270
						ASRGL1	2270								ASS1	1532
						ASS1	1532								ASTE1	2687
						ASTE1	2687								ASXL1	7052
						ASXL1	7052								ASXL2	12849
						ASXL2	12849								ATAD1	4640
						ATAD1	4640								ATAD2	5547
						ATAD2	5547								ATAD2B	8112
						ATAD2B	8112								ATAD3A	2481
						ATAD3A	2481								ATAD3B	4098
						ATAD3B	4098								ATAD5	6873
						ATAD5	6873								ATAT1	1476
						ATAT1	1476								ATE1	4895
						ATE1	4895								ATF1	2412
						ATF1	2412								ATF2	4164
						ATF2	4164								ATF3	1940
						ATF3	1940								ATF4	1419
						ATF4	1419								ATF5	2007
						ATF5	2007								ATF6	7470
						ATF6	7470								ATF6B	2620
						ATF6B	2620								ATF7	6660
						ATF7	6660								ATF7IP	8823
						ATF7IP	8823								ATG10	3029
						ATG101	1433								ATG101	1433
						ATG12	4040								ATG12	4040
						ATG13	4246								ATG13	4246
						ATG14	4715								ATG14	4715
						ATG16L1	3313								ATG16L1	3313
						ATG16L2	2140								ATG16L2	2140
						ATG2A	6318								ATG2A	6318
						ATG2B	13162								ATG2B	13162
						ATG3	1568								ATG3	1568
						ATG4A	2205								ATG4A	2205
						ATG4B	2797								ATG4B	2797
						ATG4C	2944								ATG4C	2944
						ATG4D	1963								ATG4D	1963
						ATG5	3185								ATG5	3185
						ATG7	5333								ATG7	5333
						ATG9A	3770								ATG9A	3770
						ATIC	1972								ATIC	1972
						ATL1	2504								ATL2	3805
						ATL2	3805								ATL3	6899
						ATL3	6899								ATM	12915
						ATM	12915								ATMIN	4881
						ATMIN	4881								ATN1	4702
						ATN1	4702								ATOX1	471
						ATOX1	471								ATP10D	6668
						ATP10D	6668								ATP11A	9086
						ATP11A	9086								ATP11B	7315
						ATP11B	7315								ATP11C	7019
						ATP11C	7019								ATP13A1	3849
						ATP13A1	3849								ATP13A2	3996
						ATP13A2	3996								ATP13A3	7538
						ATP13A3	7538								ATP1A1	3670
						ATP1A1	3670								ATP1B1	2216
						ATP1B1	2216								ATP1B2	3341
						ATP1B2	3341								ATP1B3	1847
						ATP1B3	1847								ATP2A2	8295
						ATP23	1245								ATP2A3	4695
						ATP2A2	8295								ATP2B1	7062
						ATP2A3	4695								ATP2B4	8697
						ATP2B1	7062								ATP2C1	4994
						ATP2B4	8697								ATP5F1A	5761
						ATP2C1	4994								ATP5F1B	1759
						ATP5F1A	5761								ATP5F1C	1101
						ATP5F1B	1759								ATP5F1D	995
						ATP5F1C	1101								ATP5F1E	3610
						ATP5F1D	995								ATP5IF1	503
						ATP5F1E	3610								ATP5MC1	646
						ATP5IF1	503								ATP5MC2	632
						ATP5MC1	646								ATP5MC3	2587
						ATP5MC2	632								ATP5ME	303
						ATP5MC3	2587								ATP5MF	443
						ATP5ME	303								ATP5MG	1121
						ATP5MF	443								ATP5MJ	615
						ATP5MG	1121								ATP5MK	660
						ATP5MJ	615								ATP5PB	2628
						ATP5MK	660								ATP5PD	609
						ATP5PB	2628								ATP5PF	526
						ATP5PD	609								ATP5PO	756
						ATP5PF	526								ATP6AP1	2054
						ATP5PO	756								ATP6AP2	2242
						ATP6AP1	2054								ATP6V0A1	4106
						ATP6AP2	2242								ATP6V0A2	6507
						ATP6V0A1	4106								ATP6V0B	987
						ATP6V0A2	6507								ATP6V0D1	1636
						ATP6V0B	987								ATP6V0E1	1419
						ATP6V0D1	1636								ATP6V0E2	1723
						ATP6V0E1	1419								ATP6V1A	4575
						ATP6V0E2	1723								ATP6V1B2	2856
						ATP6V1A	4575								ATP6V1C1	5635
						ATP6V1B2	2856								ATP6V1D	1599
						ATP6V1C1	5635								ATP6V1E1	1333
						ATP6V1D	1599								ATP6V1F	678
						ATP6V1E1	1333								ATP6V1G1	1563
						ATP6V1F	678								ATP6V1H	2120
						ATP6V1G1	1563								ATP7A	8492
						ATP6V1H	2120								ATP7B	6598
						ATP7A	8492								ATP8A1	8270
						ATP7B	6598								ATP8B2	5974
						ATP8A1	8270								ATP9A	7862
						ATP8B2	5974								ATP9B	N/A
						ATP9A	7862								ATPAF1	4068
						ATP9B	N/A								ATPAF2	1553
						ATPAF1	4068								ATPSCKMT	2651
						ATPAF2	1553								ATR	8158
						ATPSCKMT	2651								ATRAID	1227
						ATR	8158								ATRIP	4576
						ATRAID	1227								ATRN	8651
						ATRIP	4576								ATRNL1	8746
						ATRN	8651								ATRX	11165
						ATRX	11165								ATXN1	10557
						ATXN1	10557								ATXN10	3294
						ATXN10	3294								ATXN1L	7896
						ATXN1L	7896								ATXN2	4347
						ATXN2	4347								ATXN2L	4456
						ATXN2L	4456								ATXN3	6884
						ATXN3	6884								ATXN7	7076
						ATXN7	7076								ATXN7L2	2448
						ATXN7L2	2448								ATXN7L3	3951
						ATXN7L3	3951								ATXN7L3B	7596
						ATXN7L3B	7596								AUH	1574
						AUNIP	2161								AUNIP	2161
						AUP1	1458								AUP1	1458
						AURKA	2033								AURKA	2033
						AURKAIP1	753								AURKAIP1	753
						AURKB	1243								AURKB	1243
						AUTS2	7469								AUTS2	7469
						AVL9	6987								AVEN	1633
						AVPI1	1375								AVL9	6987
						AXIN1	3707								AVPI1	1375
						AZI2	4403								AXIN1	3707
						AZIN1	4196								AZI2	4403
						B2M	1715								AZIN1	4196
						B3GALNT2	4719								AZIN2	5240
						B3GALT6	2805								B2M	1715
						B3GAT3	1452								B3GALNT2	4719
						B3GLCT	4215								B3GALT6	2805
						B3GNT2	2761								B3GAT3	1452
						B3GNT5	4108								B3GLCT	4215
						B4GALNT1	5368								B3GNT2	2761
						B4GALNT3	5493								B3GNT5	4108
						B4GALNT4	3750								B4GALNT1	5368
						B4GALT1	4176								B4GALNT3	5493
						B4GALT2	2193								B4GALNT4	3750
						B4GALT3	1933								B4GALT1	4176
						B4GALT4	2234								B4GALT2	2193
						B4GALT5	4722								B4GALT3	1933
						B4GALT6	4672								B4GALT4	2234
						B4GALT7	1698								B4GALT5	4722
						B4GAT1	2007								B4GALT6	4672
						B9D1	913								B4GALT7	1698
						BABAM1	1377								B4GAT1	2007
						BABAM2	1678								B9D1	913
						BACE1	5835								BABAM1	1377
						BACE2	8567								BABAM2	1678
						BACH1	5618								BACE1	5835
						BAD	929								BACE2	8567
						BAG1	3820								BACH1	5618
						BAG2	6651								BAD	929
						BAG3	2561								BAG1	3820
						BAG4	4197								BAG2	6651
						BAG5	4684								BAG3	2561
						BAG6	3755								BAG4	4197
						BAHCC1	10726								BAG5	4684
						BAHD1	4779								BAG6	3755
						BAIAP2	3304								BAHCC1	10726
						BAIAP2L1	3645								BAHD1	4779
						BAK1	2170								BAIAP2	3304
						BAMBI	1691								BAIAP2L1	3645
						BANF1	731								BAK1	2170
						BANP	2398								BAMBI	1691
						BAP1	3600								BANF1	731
						BARD1	5478								BANP	2398
						BARX1	1511								BAP1	3600
						BATF3	836								BARD1	5478
						BAX	795								BARX1	1511
						BAZ1A	5729								BASP1	1807
						BAZ1B	6115								BATF3	836
						BAZ2A	8938								BAX	795
						BAZ2B	8145								BAZ1A	5729
						BBC3	1846								BAZ1B	6115
						BBIP1	2025								BAZ2A	8938
						BBS10	3568								BAZ2B	8145
						BBS12	3238								BBC3	1846
						BBS2	2704								BBIP1	2025
						BBS4	2467								BBS10	3568
						BBS7	3840								BBS2	2704
						BBS9	3996								BBS4	2467
						BBX	9009								BBS7	3840
						BCAM	2409								BBS9	3996
						BCAP31	1284								BBX	9009
						BCAR1	3387								BCAM	2409
						BCAS2	1275								BCAP31	1284
						BCAS3	3517								BCAR1	3387
						BCAS4	1114								BCAS2	1275
						BCAT1	9314								BCAS3	3517
						BCAT2	1563								BCAS4	1114
						BCCIP	1234								BCAT1	9314
						BCDIN3D	3226								BCAT2	1563
						BCHE	2405								BCCIP	1234
						BCKDK	2036								BCDIN3D	3226
						BCL10	2833								BCHE	2405
						BCL11A	6102								BCKDHB	3668
						BCL2L1	2574								BCKDK	2036
						BCL2L11	5098								BCL10	2833
						BCL2L12	1064								BCL11A	6102
						BCL2L13	4959								BCL2L1	2574
						BCL2L2	3526								BCL2L11	5098
						BCL6B	3527								BCL2L12	1064
						BCL7A	6247								BCL2L13	4959
						BCL7B	1663								BCL2L2	3526
						BCL7C	857								BCL6B	3527
						BCL9	6189								BCL7A	6247
						BCLAF1	7494								BCL7B	1663
						BCOR	6910								BCL7C	857
						BCORL1	7465								BCL9	6189
						BCR	6783								BCLAF1	7494
						BCS1L	1427								BCOR	6910
						BDH2	2920								BCORL1	7465
						BDP1	11073								BCR	6783
						BECN1	2109								BCS1L	1427
						BEND3	6446								BDH2	2920
						BEND4	8627								BDP1	11073
						BEND7	2378								BECN1	2109
						BET1	1481								BEND3	6446
						BET1L	2792								BEND4	8627
						BEX2	843								BEND7	2378
						BEX3	810								BET1	1481
						BEX4	1312								BET1L	2792
						BEX5	777								BEX2	843
						BFAR	3039								BEX3	810
						BHLHA15	3262								BEX4	1312
						BHLHE40	3152								BEX5	777
						BICC1	5741								BFAR	3039
						BICD1	9419								BHLHA15	3262
						BICD2	6448								BHLHE40	3152
						BICRA	5687								BICC1	5741
						BID	2177								BICD1	9419
						BIN1	2487								BICD2	6448
						BIN3	1836								BICRA	5687
						BIRC2	3764								BICRAL	6501
						BIRC5	2574								BID	2177
						BIRC6	15687								BIN1	2487
						BIVM	3789								BIN3	1836
						BLCAP	2018								BIRC2	3764
						BLM	5240								BIRC5	2574
						BLMH	2307								BIRC6	15687
						BLOC1S1	562								BIVM	3789
						BLOC1S2	2619								BLCAP	2018
						BLOC1S3	2561								BLM	5240
						BLOC1S4	1491								BLMH	2307
						BLOC1S5	2659								BLOC1S1	562
						BLOC1S6	3778								BLOC1S2	2619
						BLVRA	1074								BLOC1S3	2561
						BLVRB	799								BLOC1S4	1491
						BLZF1	2524								BLOC1S5	2659
						BMI1	3540								BLOC1S6	3778
						BMP1	3593								BLVRA	1074
						BMP2K	8012								BLVRB	799
						BMP4	1931								BLZF1	2524
						BMP7	4021								BMI1	3540
						BMP8B	4826								BMP1	3593
						BMPR1A	6417								BMP2K	8012
						BMPR2	12068								BMP4	1931
						BMS1	7759								BMP6	3784
						BMT2	3940								BMP7	4021
						BNIP1	1168								BMP8B	4826
						BNIP2	6111								BMPR1A	6417
						BNIP3	1542								BMPR2	12068
						BNIP3L	3452								BMS1	7759
						BOC	4574								BMT2	3940
						BOD1	1921								BNIP1	1168
						BOD1L1	10567								BNIP2	6111
						BOLA1	891								BNIP3	1542
						BOLA2B	375								BNIP3L	3452
						BOLA3	555								BOC	4574
						BOP1	2428								BOD1	1921
						BORA	2760								BOD1L1	10567
						BORCS5	6422								BOLA1	891
						BORCS6	1836								BOLA2B	375
						BORCS7	2386								BOLA3	555
						BORCS8	992								BOP1	2428
						BPGM	1711								BORA	2760
						BPHL	1909								BORCS6	1836
						BPNT1	2400								BORCS7	2386
						BPNT2	7224								BORCS8	992
						BPTF	11075								BPGM	1711
						BRAF	6459								BPHL	1909
						BRAP	3996								BPNT1	2400
						BRAT1	2779								BPNT2	7224
						BRCA1	7088								BPTF	11075
						BRCA2	11954								BRAF	6459
						BRCC3	2769								BRAP	3996
						BRD1	4911								BRAT1	2779
						BRD2	N/A								BRCA1	7088
						BRD3	5661								BRCA2	11954
						BRD3OS	5682								BRCC3	2769
						BRD4	7231								BRD1	4911
						BRD7	5424								BRD2	N/A
						BRD8	4028								BRD3	5661
						BRD9	2665								BRD3OS	5682
						BRF1	3671								BRD4	7231
						BRF2	2560								BRD7	5424
						BRI3	790								BRD8	4028
						BRI3BP	6703								BRD9	2665
						BRINP3	3128								BRF1	3671
						BRIP1	8182								BRF2	2560
						BRIX1	1591								BRI3	790
						BRK1	1150								BRI3BP	6703
						BRMS1	1424								BRINP3	3128
						BRMS1L	2637								BRIP1	8182
						BROX	4104								BRIX1	1591
						BRPF1	4743								BRK1	1150
						BRPF3	6052								BRMS1	1424
						BRSK1	3277								BRMS1L	2637
						BRSK2	4528								BROX	4104
						BRWD1	17728								BRPF1	4743
						BRWD3	12921								BRPF3	6052
						BSDC1	3309								BRSK1	3277
						BSG	1946								BRSK2	4528
						BST2	1001								BRWD1	17728
						BTAF1	8361								BRWD3	12921
						BTBD1	3194								BSDC1	3309
						BTBD10	2439								BSG	1946
						BTBD2	2629								BSN	15971
						BTBD3	4881								BST2	1001
						BTBD6	2217								BTAF1	8361
						BTBD7	8430								BTBD1	3194
						BTBD8	5999								BTBD10	2439
						BTD	9964								BTBD2	2629
						BTF3	1276								BTBD3	4881
						BTF3L4	4533								BTBD6	2217
						BTG1	4629								BTBD7	8430
						BTG2	2729								BTD	9964
						BTG3	1410								BTF3	1276
						BTN2A1	2890								BTF3L4	4533
						BTN2A2	3583								BTG1	4629
						BTN3A1	3388								BTG2	2729
						BTN3A2	3776								BTG3	1410
						BTN3A3	2970								BTN2A1	2890
						BTNL9	3457								BTN2A2	3583
						BTRC	6024								BTN3A1	3388
						BUB1	3762								BTN3A2	3776
						BUB1B	3669								BTN3A3	2970
						BUB3	7703								BTNL9	3457
						BUD13	2192								BTRC	6024
						BUD23	1201								BUB1	3762
						BUD31	1052								BUB1B	3669
						BVES	5550								BUB3	7703
						BYSL	1718								BUD13	2192
						BZW1	6511								BUD23	1201
						BZW2	1804								BUD31	1052
						C10orf88	2913								BVES	5550
						C11orf1	2568								BYSL	1718
						C11orf24	2071								BZW1	6511
						C11orf58	3920								BZW2	1804
						C11orf68	1562								C10orf88	2913
						C11orf80	1998								C11orf1	2568
						C12orf29	2829								C11orf24	2071
						C12orf4	3817								C11orf54	4163
						C12orf43	4469								C11orf58	3920
						C12orf57	561								C11orf68	1562
						C12orf60	1586								C11orf71	1980
						C12orf73	1702								C11orf80	1998
						C12orf75	1311								C12orf29	2829
						C12orf76	1443								C12orf4	3817
						C14orf119	2914								C12orf43	4469
						C14orf132	7627								C12orf57	561
						C15orf39	4425								C12orf73	1702
						C15orf40	11274								C12orf75	1311
						C15orf61	4193								C12orf76	1443
						C16orf72	5952								C14orf119	2914
						C16orf87	6845								C14orf132	7627
						C16orf91	917								C14orf93	3360
						C17orf58	2105								C15orf39	4425
						C17orf75	4547								C15orf40	11274
						C17orf80	3618								C15orf61	4193
						C18orf21	985								C16orf72	5952
						C18orf25	5456								C16orf87	6845
						C18orf54	5703								C16orf91	917
						C19orf12	4348								C17orf58	2105
						C19orf25	2243								C17orf75	4547
						C19orf44	3346								C17orf80	3618
						C19orf47	3611								C18orf21	985
						C19orf53	897								C18orf25	5456
						C19orf54	3302								C18orf54	5703
						C19orf81	N/A								C19orf12	4348
						C1D	2241								C19orf25	2243
						C1GALT1	6275								C19orf44	3346
						C1GALT1C1	1636								C19orf47	3611
						C1orf109	2696								C19orf53	897
						C1orf112	4011								C19orf54	3302
						C1orf115	2891								C19orf81	N/A
						C1orf122	1329								C1D	2241
						C1orf131	1430								C1GALT1	6275
						C1orf159	1832								C1GALT1C1	1636
						C1orf174	1645								C1orf109	2696
						C1orf198	3726								C1orf112	4011
						C1orf21	10293								C1orf115	2891
						C1orf216	2628								C1orf122	1329
						C1orf35	1290								C1orf131	1430
						C1orf43	1678								C1orf159	1832
						C1orf52	3254								C1orf174	1645
						C1orf54	509								C1orf198	3726
						C1orf74	4684								C1orf21	10293
						C1QBP	1169								C1orf216	2628
						C1QL1	1527								C1orf35	1290
						C1QL4	2073								C1orf43	1678
						C1QTNF6	2893								C1orf52	3254
						C1R	2347								C1orf54	509
						C20orf27	1252								C1orf74	4684
						C20orf96	1576								C1QBP	1169
						C21orf58	2970								C1QL1	1527
						C21orf91	5396								C1QL4	2073
						C22orf39	3720								C1QTNF6	2893
						C2CD2L	4807								C20orf27	1252
						C2CD3	7939								C20orf96	1576
						C2CD5	4585								C21orf58	2970
						C2orf42	2524								C21orf91	5396
						C2orf49	4587								C22orf39	3720
						C2orf68	4274								C2CD2L	4807
						C2orf69	3691								C2CD3	7939
						C2orf72	3629								C2CD5	4585
						C2orf76	685								C2orf42	2524
						C3	5231								C2orf49	4587
						C3orf14	3369								C2orf68	4274
						C3orf18	2657								C2orf69	3691
						C3orf38	2414								C2orf76	685
						C3orf52	2054								C3	5231
						C4orf3	2671								C3orf14	3369
						C4orf33	5513								C3orf38	2414
						C4orf46	3366								C3orf52	2054
						C4orf48	425								C3orf62	3748
						C5orf15	2188								C4orf3	2671
						C5orf22	3572								C4orf33	5513
						C5orf24	5083								C4orf46	3366
						C5orf34	2502								C4orf48	425
						C6orf120	4235								C5orf15	2188
						C6orf47	2473								C5orf22	3572
						C6orf62	2452								C5orf24	5083
						C6orf89	6763								C5orf34	2502
						C7orf31	3770								C6orf120	4235
						C7orf50	2138								C6orf136	N/A
						C8orf33	2588								C6orf47	2473
						C8orf82	2455								C6orf62	2452
						C8orf88	1041								C6orf89	6763
						C9orf40	2351								C7orf31	3770
						C9orf64	2468								C7orf50	2138
						C9orf72	3231								C8orf33	2588
						C9orf78	1795								C8orf82	2455
						C9orf85	1185								C8orf88	1041
						CA11	1715								C9orf40	2351
						CA12	6098								C9orf64	2468
						CA2	1562								C9orf72	3231
						CA8	5735								C9orf78	1795
						CAAP1	2789								C9orf85	1185
						CAB39	3829								CA11	1715
						CABIN1	7233								CA12	6098
						CABLES1	5283								CA2	1562
						CABLES2	3783								CA8	5735
						CABYR	1305								CAAP1	2789
						CACFD1	2880								CAB39	3829
						CACHD1	5933								CABIN1	7233
						CACNA1H	8219								CABLES1	5283
						CACNA2D1	7542								CABLES2	3783
						CACNA2D2	5696								CABYR	1305
						CACNB1	3711								CACFD1	2880
						CACNB3	2931								CACHD1	5933
						CACNB4	7944								CACNA1H	8219
						CACNG8	8850								CACNA2D1	7542
						CACTIN	3583								CACNA2D2	5696
						CACUL1	11035								CACNB3	2931
						CACYBP	2869								CACNB4	7944
						CAD	7286								CACNG8	8850
						CADM1	8675								CACTIN	3583
						CADM4	2189								CACUL1	11035
						CADPS2	5768								CACYBP	2869
						CALCB	1044								CAD	7286
						CALCOCO1	5576								CADM1	8675
						CALCOCO2	3635								CADM4	2189
						CALD1	5011								CADPS2	5768
						CALM1	4203								CALCB	1044
						CALM2	1210								CALCOCO1	5576
						CALM3	2184								CALCOCO2	3635
						CALR	1901								CALD1	5011
						CALU	5266								CALM1	4203
						CAMK1	1453								CALM2	1210
						CAMK1D	8088								CALM3	2184
						CAMK2D	5785								CALR	1901
						CAMK2G	3878								CALU	5266
						CAMK2N1	2326								CAMK1	1453
						CAMK4	11942								CAMK1D	8088
						CAMKK1	3572								CAMK2D	5785
						CAMKK2	4905								CAMK2G	3878
						CAMKV	2998								CAMK2N1	2326
						CAMLG	2171								CAMK4	11942
						CAMSAP1	8018								CAMKK1	3572
						CAMSAP2	8017								CAMKK2	4905
						CAMSAP3	4137								CAMKMT	1512
						CAMTA1	8314								CAMKV	2998
						CAMTA2	4515								CAMLG	2171
						CAND1	11176								CAMSAP1	8018
						CAND2	4573								CAMSAP2	8017
						CANT1	3287								CAMSAP3	4137
						CANX	4915								CAMTA1	8314
						CAP1	2626								CAMTA2	4515
						CAP2	2925								CAND1	11176
						CAPG	1250								CAND2	4573
						CAPN1	2952								CANT1	3287
						CAPN10	2621								CANX	4915
						CAPN15	4888								CAP1	2626
						CAPN2	3366								CAP2	2925
						CAPN7	4348								CAPG	1250
						CAPNS1	1428								CAPN1	2952
						CAPRIN1	5514								CAPN10	2621
						CAPRIN2	3727								CAPN15	4888
						CAPZA1	2358								CAPN2	3366
						CAPZA2	5068								CAPN7	4348
						CAPZB	1675								CAPNS1	1428
						CARD10	4111								CAPRIN1	5514
						CARD19	857								CAPRIN2	3727
						CARD8	5610								CAPZA1	2358
						CARHSP1	2709								CAPZA2	5068
						CARM1	3295								CAPZB	1675
						CARMIL1	5485								CARD10	4111
						CARMIL2	4462								CARD19	857
						CARNMT1	4259								CARD8	5610
						CARS1	2758								CARHSP1	2709
						CARS2	1838								CARM1	3295
						CASC3	3890								CARMIL1	5485
						CASD1	3931								CARMIL2	4462
						CASK	8833								CARNMT1	4259
						CASKIN1	5839								CARS1	2758
						CASKIN2	4969								CARS2	1838
						CASP10	5668								CASC3	3890
						CASP2	4089								CASD1	3931
						CASP3	2645								CASK	8833
						CASP6	1634								CASKIN2	4969
						CASP7	2344								CASP10	5668
						CASP8	2659								CASP2	4089
						CASP8AP2	N/A								CASP3	2645
						CASP9	2808								CASP6	1634
						CAST	4490								CASP7	2344
						CASTOR2	8100								CASP8	2659
						CAT	2291								CASP8AP2	N/A
						CAV1	2456								CASP9	2808
						CAV2	2953								CAST	4490
						CAVIN1	3570								CASTOR2	8100
						CBFA2T2	7344								CAT	2291
						CBFB	3103								CAV1	2456
						CBL	11168								CAV2	2953
						CBLB	6749								CAVIN1	3570
						CBLL1	3987								CBFA2T2	7344
						CBR1	1208								CBFB	3103
						CBR4	3440								CBL	11168
						CBS	2495								CBLB	6749
						CBWD1	1905								CBLL1	3987
						CBWD2	1827								CBR1	1208
						CBWD3	1685								CBR4	3440
						CBWD5	1662								CBS	2495
						CBWD6	1672								CBWD1	1905
						CBX1	2182								CBWD2	1827
						CBX2	4628								CBWD3	1685
						CBX3	2061								CBWD5	1662
						CBX4	2675								CBWD6	1672
						CBX5	11546								CBX1	2182
						CBX6	6052								CBX2	4628
						CBX7	4111								CBX3	2061
						CBX8	3752								CBX4	2675
						CBY1	1146								CBX5	11546
						CC2D1A	3581								CBX6	6052
						CC2D1B	5338								CBX7	4111
						CCAR1	4658								CBX8	3752
						CCAR2	3685								CBY1	1146
						CCDC102A	2432								CC2D1A	3581
						CCDC106	2093								CC2D1B	5338
						CCDC107	1264								CCAR1	4658
						CCDC112	2387								CCAR2	3685
						CCDC113	5272								CCDC102A	2432
						CCDC115	1769								CCDC106	2093
						CCDC117	3964								CCDC107	1264
						CCDC12	841								CCDC112	2387
						CCDC120	3467								CCDC113	5272
						CCDC122	2059								CCDC115	1769
						CCDC124	987								CCDC117	3964
						CCDC125	N/A								CCDC12	841
						CCDC126	2470								CCDC120	3467
						CCDC127	9283								CCDC121	2343
						CCDC134	7135								CCDC124	987
						CCDC136	4246								CCDC125	N/A
						CCDC137	2095								CCDC126	2470
						CCDC138	2375								CCDC127	9283
						CCDC14	4131								CCDC134	7135
						CCDC142	4128								CCDC136	4246
						CCDC15	3812								CCDC137	2095
						CCDC150	3597								CCDC138	2375
						CCDC163	2095								CCDC14	4131
						CCDC167	572								CCDC142	4128
						CCDC174	2940								CCDC15	3812
						CCDC18	4752								CCDC150	3597
						CCDC181	1917								CCDC167	572
						CCDC186	7228								CCDC174	2940
						CCDC191	3889								CCDC18	4752
						CCDC22	2310								CCDC181	1917
						CCDC25	3627								CCDC186	7228
						CCDC28A	1247								CCDC191	3889
						CCDC28B	880								CCDC22	2310
						CCDC3	2747								CCDC25	3627
						CCDC32	1509								CCDC28A	1247
						CCDC34	1452								CCDC28B	880
						CCDC40	4288								CCDC3	2747
						CCDC43	2114								CCDC32	1509
						CCDC47	3283								CCDC34	1452
						CCDC50	8629								CCDC40	4288
						CCDC51	1611								CCDC43	2114
						CCDC57	3362								CCDC47	3283
						CCDC59	1585								CCDC50	8629
						CCDC6	5727								CCDC51	1611
						CCDC66	3134								CCDC57	3362
						CCDC69	3398								CCDC59	1585
						CCDC71	1791								CCDC6	5727
						CCDC71L	6799								CCDC66	3134
						CCDC74A	1290								CCDC69	3398
						CCDC74B	1329								CCDC71	1791
						CCDC77	2300								CCDC71L	6799
						CCDC8	3236								CCDC74A	1290
						CCDC80	12301								CCDC74B	1329
						CCDC82	2715								CCDC77	2300
						CCDC85B	963								CCDC8	3236
						CCDC85C	16564								CCDC80	12301
						CCDC86	1851								CCDC82	2715
						CCDC88A	9751								CCDC85B	963
						CCDC88C	7519								CCDC85C	16564
						CCDC9	2027								CCDC86	1851
						CCDC90B	3990								CCDC88A	9751
						CCDC91	2519								CCDC88C	7519
						CCDC92	2491								CCDC9	2027
						CCDC93	6833								CCDC90B	3990
						CCDC97	3329								CCDC91	2519
						CCHCR1	2954								CCDC92	2491
						CCM2	1864								CCDC93	6833
						CCN1	2278								CCDC97	3329
						CCNA2	2748								CCHCR1	2954
						CCNB1	2029								CCM2	1864
						CCNB1IP1	1470								CCN1	2278
						CCNB2	1488								CCNA2	2748
						CCNC	2153								CCNB1	2029
						CCND1	4238								CCNB1IP1	1470
						CCND2	6493								CCNB2	1488
						CCND3	2026								CCNC	2153
						CCNDBP1	3515								CCND1	4238
						CCNE1	1954								CCND2	6493
						CCNE2	2674								CCND3	2026
						CCNF	4230								CCNDBP1	3515
						CCNG1	2444								CCNE1	1954
						CCNG2	5471								CCNE2	2674
						CCNH	1280								CCNF	4230
						CCNI	2759								CCNG1	2444
						CCNJ	3959								CCNG2	5471
						CCNK	3524								CCNH	1280
						CCNL1	2322								CCNI	2759
						CCNL2	3112								CCNJ	3959
						CCNQ	1253								CCNK	3524
						CCNT1	6788								CCNL1	2322
						CCNT2	6920								CCNL2	3112
						CCNY	5068								CCNQ	1253
						CCNYL1	3813								CCNT1	6788
						CCP110	5275								CCNT2	6920
						CCPG1	3553								CCNY	5068
						CCS	1066								CCNYL1	3813
						CCSAP	5217								CCP110	5275
						CCSER2	7653								CCS	1066
						CCT2	1916								CCSAP	5217
						CCT3	1977								CCSER2	7653
						CCT4	2376								CCT2	1916
						CCT5	3293								CCT3	1977
						CCT6A	2584								CCT4	2376
						CCT7	1847								CCT5	3293
						CCT8	1854								CCT6A	2584
						CCZ1	2379								CCT7	1847
						CCZ1B	1814								CCT8	1854
						CD109	9031								CCZ1	2379
						CD151	1545								CCZ1B	1814
						CD164	3020								CD109	9031
						CD276	3295								CD151	1545
						CD2AP	5412								CD164	3020
						CD2BP2	3361								CD24	2156
						CD302	3932								CD276	3295
						CD320	1253								CD2AP	5412
						CD40	1682								CD2BP2	3361
						CD46	3320								CD302	3932
						CD47	5292								CD320	1253
						CD55	2590								CD40	1682
						CD59	7563								CD46	3320
						CD63	1023								CD47	5292
						CD81	1482								CD55	2590
						CD83	2328								CD59	7563
						CD9	1225								CD63	1023
						CD99	1129								CD81	1482
						CD99L2	3567								CD83	2328
						CDADC1	3386								CD9	1225
						CDAN1	4657								CD99	1129
						CDC123	1321								CD99L2	3567
						CDC14A	4231								CDADC1	3386
						CDC14B	5602								CDAN1	4657
						CDC16	2331								CDC123	1321
						CDC20	1649								CDC14B	5602
						CDC23	3133								CDC16	2331
						CDC25A	3844								CDC20	1649
						CDC25B	3119								CDC23	3133
						CDC25C	2093								CDC25A	3844
						CDC26	871								CDC25B	3119
						CDC27	5830								CDC25C	2093
						CDC34	1418								CDC26	871
						CDC37	1618								CDC27	5830
						CDC37L1	3500								CDC34	1418
						CDC40	3859								CDC37	1618
						CDC42	10503								CDC37L1	3500
						CDC42BPA	10978								CDC40	3859
						CDC42BPB	6844								CDC42	10503
						CDC42EP1	2148								CDC42BPA	10978
						CDC42EP3	5096								CDC42BPB	6844
						CDC42EP4	3098								CDC42EP1	2148
						CDC42SE1	3006								CDC42EP3	5096
						CDC42SE2	4404								CDC42EP4	3098
						CDC45	1879								CDC42SE1	3006
						CDC5L	6241								CDC42SE2	4404
						CDC6	4564								CDC45	1879
						CDC7	3215								CDC5L	6241
						CDC73	5869								CDC6	4564
						CDCA2	3486								CDC7	3215
						CDCA3	1144								CDC73	5869
						CDCA4	2448								CDCA2	3486
						CDCA5	2475								CDCA3	1144
						CDCA7	2778								CDCA4	2448
						CDCA7L	2883								CDCA5	2475
						CDCA8	2371								CDCA7	2778
						CDH2	4016								CDCA7L	2883
						CDH24	3415								CDCA8	2371
						CDHR1	6877								CDH2	4016
						CDIP1	3009								CDH23	11138
						CDIPT	1843								CDH24	3415
						CDK1	1889								CDHR1	6877
						CDK10	1767								CDIN1	2872
						CDK11B	2992								CDIP1	3009
						CDK12	8287								CDIPT	1843
						CDK13	9525								CDK1	1889
						CDK14	5171								CDK10	1767
						CDK16	3151								CDK11B	2992
						CDK17	4036								CDK12	8287
						CDK18	2986								CDK13	9525
						CDK19	6399								CDK14	5171
						CDK2	2240								CDK16	3151
						CDK20	2149								CDK17	4036
						CDK2AP1	1346								CDK18	2986
						CDK2AP2	909								CDK19	6399
						CDK4	1865								CDK2	2240
						CDK5	1122								CDK20	2149
						CDK5R1	3948								CDK2AP1	1346
						CDK5RAP1	2080								CDK2AP2	909
						CDK5RAP2	6232								CDK4	1865
						CDK5RAP3	1834								CDK5	1122
						CDK6	11663								CDK5R1	3948
						CDK7	1432								CDK5RAP1	2080
						CDK8	3065								CDK5RAP2	6232
						CDK9	2483								CDK5RAP3	1834
						CDKAL1	3272								CDK6	11663
						CDKL2	4935								CDK7	1432
						CDKL5	14572								CDK8	3065
						CDKN1A	2117								CDK9	2483
						CDKN1B	2411								CDKAL1	3272
						CDKN2A	978								CDKL1	5402
						CDKN2AIP	3542								CDKL2	4935
						CDKN2AIPNL	1228								CDKL5	14572
						CDKN2B	3853								CDKN1A	2117
						CDKN2C	995								CDKN1B	2411
						CDKN3	841								CDKN2A	978
						CDON	8265								CDKN2AIP	3542
						CDPF1	1489								CDKN2AIPNL	1228
						CDR2	2704								CDKN2B	3853
						CDR2L	3536								CDKN2C	995
						CDS1	4309								CDKN2D	1425
						CDS2	9076								CDKN3	841
						CDT1	2664								CDON	8265
						CDV3	3351								CDPF1	1489
						CDX2	3448								CDR2	2704
						CDYL	3503								CDR2L	3536
						CEACAM19	2215								CDS1	4309
						CEBPA	2601								CDS2	9076
						CEBPB	1839								CDT1	2664
						CEBPG	3730								CDV3	3351
						CEBPZ	3346								CDX2	3448
						CEBPZOS	3152								CDYL	3503
						CECR2	10030								CEBPA	2601
						CELF1	8132								CEBPB	1839
						CELSR1	11559								CEBPG	3730
						CELSR2	11015								CEBPZ	3346
						CELSR3	11933								CEBPZOS	3152
						CEMIP2	6152								CECR2	10030
						CENATAC	1254								CELF1	8132
						CENPA	1389								CELSR1	11559
						CENPB	2890								CELSR2	11015
						CENPC	6823								CELSR3	11933
						CENPE	8541								CEMIP2	6152
						CENPF	10290								CENATAC	1254
						CENPH	1354								CENPA	1389
						CENPI	5584								CENPB	2890
						CENPJ	5082								CENPC	6823
						CENPK	1731								CENPE	8541
						CENPL	2706								CENPF	10290
						CENPM	938								CENPH	1354
						CENPN	3928								CENPI	5584
						CENPO	4106								CENPJ	5082
						CENPP	8293								CENPK	1731
						CENPQ	1741								CENPL	2706
						CENPT	2580								CENPM	938
						CENPU	2494								CENPN	3928
						CENPV	1132								CENPO	4106
						CENPW	809								CENPP	8293
						CENPX	765								CENPQ	1741
						CEP104	6431								CENPT	2580
						CEP112	3447								CENPU	2494
						CEP120	4993								CENPV	1132
						CEP128	4614								CENPW	809
						CEP131	3630								CENPX	765
						CEP135	5596								CEP104	6431
						CEP152	5560								CEP112	3447
						CEP162	5155								CEP120	4993
						CEP164	5629								CEP128	4614
						CEP170	6828								CEP131	3630
						CEP170B	6727								CEP135	5596
						CEP192	7960								CEP152	5560
						CEP20	646								CEP162	5155
						CEP250	15434								CEP164	5629
						CEP290	7824								CEP170	6828
						CEP295	8014								CEP170B	6727
						CEP350	13414								CEP192	7960
						CEP41	6292								CEP20	646
						CEP43	13956								CEP250	15434
						CEP44	4298								CEP290	7824
						CEP55	2658								CEP295	8014
						CEP57	3141								CEP350	13414
						CEP57L1	12903								CEP41	6292
						CEP68	5803								CEP43	13956
						CEP70	2636								CEP44	4298
						CEP72	N/A								CEP55	2658
						CEP76	2895								CEP57	3141
						CEP78	11233								CEP57L1	12903
						CEP83	3686								CEP63	5779
						CEP85	3934								CEP68	5803
						CEP85L	7373								CEP70	2636
						CEP89	5673								CEP72	N/A
						CEP95	2754								CEP76	2895
						CEP97	7672								CEP78	11233
						CEPT1	2203								CEP83	3686
						CERCAM	2308								CEP85	3934
						CERK	4442								CEP85L	7373
						CERS2	2323								CEP89	5673
						CERS4	1780								CEP95	2754
						CERS5	2507								CEP97	7672
						CERS6	6804								CEPT1	2203
						CERT1	3868								CERCAM	2308
						CES2	2871								CERK	4442
						CES3	3858								CERS1	2579
						CETN2	1413								CERS2	2323
						CETN3	2406								CERS4	1780
						CFAP20	1281								CERS5	2507
						CFAP298	3516								CERS6	6804
						CFAP36	1184								CERT1	3868
						CFAP44	10238								CES2	2871
						CFAP97	4851								CES3	3858
						CFDP1	1293								CETN2	1413
						CFL1	1245								CETN3	2406
						CFL2	4306								CFAP20	1281
						CFLAR	14612								CFAP20DC	3291
						CGGBP1	4548								CFAP298	3516
						CGN	5101								CFAP36	1184
						CGRRF1	1962								CFAP410	2221
						CHAC1	1520								CFAP44	10238
						CHAC2	1309								CFAP97	4851
						CHAF1A	3366								CFD	N/A
						CHAF1B	4466								CFDP1	1293
						CHAMP1	3799								CFL1	1245
						CHCHD1	850								CFL2	4306
						CHCHD10	691								CFLAR	14612
						CHCHD2	797								CGGBP1	4548
						CHCHD3	1604								CGN	5101
						CHCHD4	1433								CGRRF1	1962
						CHCHD5	523								CHAC1	1520
						CHCHD6	1000								CHAC2	1309
						CHCHD7	1697								CHAF1A	3366
						CHD1	8145								CHAF1B	4466
						CHD2	9350								CHAMP1	3799
						CHD3	7385								CHCHD1	850
						CHD4	6491								CHCHD10	691
						CHD6	10719								CHCHD2	797
						CHD7	11606								CHCHD3	1604
						CHD8	8467								CHCHD4	1433
						CHD9	11547								CHCHD5	523
						CHDH	7694								CHCHD6	1000
						CHEK1	4128								CHCHD7	1697
						CHEK2	1844								CHD1	8145
						CHERP	4075								CHD2	9350
						CHFR	11228								CHD3	7385
						CHIC1	6869								CHD4	6491
						CHID1	3260								CHD6	10719
						CHKA	2714								CHD7	11606
						CHM	5438								CHD8	8467
						CHML	7711								CHD9	11547
						CHMP1A	2342								CHDH	7694
						CHMP1B	3032								CHEK1	4128
						CHMP2A	894								CHEK2	1844
						CHMP2B	2590								CHERP	4075
						CHMP3	3138								CHFR	11228
						CHMP4B	1602								CHIC1	6869
						CHMP5	1901								CHIC2	1109
						CHMP6	1664								CHID1	3260
						CHMP7	3410								CHKA	2714
						CHN1	3156								CHM	5438
						CHORDC1	3070								CHML	7711
						CHP1	3201								CHMP1A	2342
						CHPF	3028								CHMP1B	3032
						CHPF2	3989								CHMP2A	894
						CHPT1	1572								CHMP2B	2590
						CHRAC1	2481								CHMP3	3138
						CHRD	3540								CHMP4B	1602
						CHRFAM7A	2859								CHMP5	1901
						CHRNA5	3623								CHMP6	1664
						CHRNA7	2071								CHMP7	3410
						CHRNB1	2560								CHN1	3156
						CHST10	2854								CHORDC1	3070
						CHST11	5734								CHP1	3201
						CHST12	15985								CHPF	3028
						CHST14	2175								CHPF2	3989
						CHST15	4809								CHPT1	1572
						CHST2	4142								CHRAC1	2481
						CHST3	6934								CHRD	3540
						CHSY1	4662								CHRFAM7A	2859
						CHTF18	3092								CHRNA3	3015
						CHTOP	2079								CHRNA5	3623
						CHUK	3600								CHRNA7	2071
						CHURC1	3518								CHRNB1	2560
						CIAO1	3968								CHST10	2854
						CIAO2A	919								CHST11	5734
						CIAO2B	668								CHST12	15985
						CIAO3	2095								CHST14	2175
						CIAPIN1	2021								CHST15	4809
						CIB1	1141								CHST2	4142
						CIB2	1499								CHST3	6934
						CIBAR1	4198								CHSY1	4662
						CIC	8299								CHTF18	3092
						CILK1	6146								CHTOP	2079
						CILP2	4199								CHUK	3600
						CINP	953								CHURC1	3518
						CIP2A	4066								CIAO1	3968
						CIPC	4325								CIAO2A	919
						CIR1	1918								CIAO2B	668
						CIRBP	3346								CIAO3	2095
						CISD1	2375								CIAPIN1	2021
						CISD2	5878								CIB1	1141
						CISD3	2074								CIB2	1499
						CIT	8736								CIBAR1	4198
						CITED2	2382								CIC	8299
						CIZ1	2975								CILK1	6146
						CKAP2	3614								CILP2	4199
						CKAP2L	4723								CINP	953
						CKAP4	3121								CIP2A	4066
						CKAP5	7172								CIPC	4325
						CKB	1420								CIR1	1918
						CKLF	656								CIRBP	3346
						CKMT1A	1579								CISD1	2375
						CKMT1B	1579								CISD2	5878
						CKS1B	779								CISD3	2074
						CKS2	616								CIT	8736
						CLASP1	8141								CITED2	2382
						CLASP2	7159								CIZ1	2975
						CLASRP	2229								CKAP2	3614
						CLBA1	2379								CKAP2L	4723
						CLCC1	4994								CKAP4	3121
						CLCN3	6635								CKAP5	7172
						CLCN5	9863								CKB	1420
						CLCN6	5589								CKLF	656
						CLCN7	4168								CKMT1A	1579
						CLDN12	3533								CKMT1B	1579
						CLDN15	1224								CKS1B	779
						CLDND1	2010								CKS2	616
						CLEC16A	6812								CLASP1	8141
						CLGN	2725								CLASP2	7159
						CLIC1	1560								CLASRP	2229
						CLIC4	4253								CLBA1	2379
						CLINT1	3952								CLCC1	4994
						CLIP1	5978								CLCN3	6635
						CLIP2	5623								CLCN5	9863
						CLIP4	4299								CLCN6	5589
						CLK1	1847								CLCN7	4168
						CLK2	2166								CLDN12	3533
						CLK3	1854								CLDN15	1224
						CLK4	2504								CLDND1	2010
						CLMN	12749								CLEC16A	6812
						CLN5	5243								CLGN	2725
						CLN6	2228								CLIC1	1560
						CLN8	7111								CLIC4	4253
						CLNS1A	2982								CLINT1	3952
						CLOCK	10470								CLIP1	5978
						CLP1	1828								CLIP2	5623
						CLPB	9963								CLIP4	4299
						CLPP	2410								CLK1	1847
						CLPTM1	2470								CLK2	2166
						CLPTM1L	1945								CLK3	1854
						CLPX	4695								CLK4	2504
						CLSPN	8512								CLMN	12749
						CLSTN1	4760								CLN5	5243
						CLSTN3	4013								CLN6	2228
						CLTA	1078								CLN8	7111
						CLTB	1139								CLNS1A	2982
						CLTC	8369								CLOCK	10470
						CLTCL1	5518								CLP1	1828
						CLU	2749								CLPB	9963
						CLUAP1	4083								CLPP	2410
						CLUH	5357								CLPTM1	2470
						CMAS	1748								CLPTM1L	1945
						CMBL	3893								CLPX	4695
						CMC1	6009								CLSPN	8512
						CMC2	10072								CLSTN1	4760
						CMIP	4719								CLSTN3	4013
						CMPK1	2937								CLTA	1078
						CMSS1	4302								CLTB	1139
						CMTM3	1901								CLTC	8369
						CMTM4	8153								CLTCL1	5518
						CMTM6	3307								CLU	2749
						CMTM7	1856								CLUAP1	4083
						CMTM8	1169								CLUH	5357
						CMTR1	4034								CLYBL	1181
						CMTR2	4875								CMAS	1748
						CNBP	3295								CMBL	3893
						CNDP2	4975								CMC1	6009
						CNEP1R1	2092								CMC2	10072
						CNIH1	4735								CMIP	4719
						CNIH4	4096								CMPK1	2937
						CNKSR3	21078								CMSS1	4302
						CNN2	2149								CMTM3	1901
						CNN3	1991								CMTM4	8153
						CNNM1	5702								CMTM6	3307
						CNNM2	15857								CMTM7	1856
						CNNM3	4900								CMTM8	1169
						CNNM4	4783								CMTR1	4034
						CNOT1	8411								CMTR2	4875
						CNOT10	2772								CNBP	3295
						CNOT11	2515								CNDP2	4975
						CNOT2	2844								CNEP1R1	2092
						CNOT3	4138								CNIH1	4735
						CNOT4	3538								CNIH4	4096
						CNOT6	6219								CNKSR3	21078
						CNOT6L	8772								CNN2	2149
						CNOT7	6890								CNN3	1991
						CNOT8	2446								CNNM2	15857
						CNOT9	3820								CNNM3	4900
						CNP	5172								CNNM4	4783
						CNPPD1	2019								CNOT1	8411
						CNPY2	1450								CNOT10	2772
						CNPY3	1431								CNOT11	2515
						CNPY4	1478								CNOT2	2844
						CNRIP1	1896								CNOT3	4138
						CNST	5127								CNOT4	3538
						CNTLN	5518								CNOT6	6219
						CNTN1	5667								CNOT6L	8772
						CNTNAP1	5537								CNOT7	6890
						CNTNAP3B	7652								CNOT8	2446
						CNTRL	7719								CNOT9	3820
						CNTROB	3996								CNP	5172
						COA1	899								CNPPD1	2019
						COA3	780								CNPY2	1450
						COA4	818								CNPY3	1431
						COA5	1770								CNPY4	1478
						COA6	1741								CNRIP1	1896
						COA7	3988								CNST	5127
						COA8	1234								CNTFR	2038
						COASY	2479								CNTLN	5518
						COBL	5301								CNTN1	5667
						COBLL1	9309								CNTNAP1	5537
						COCH	2536								CNTRL	7719
						COG1	3014								CNTROB	3996
						COG2	2932								COA1	899
						COG3	4555								COA3	780
						COG4	2820								COA4	818
						COG5	4060								COA5	1770
						COG6	3574								COA6	1741
						COG7	2935								COA7	3988
						COG8	4629								COA8	1234
						COIL	2634								COASY	2479
						COL14A1	8009								COBL	5301
						COL18A1	5408								COBLL1	9309
						COL1A1	5914								COCH	2536
						COL25A1	7713								COG1	3014
						COL27A1	7813								COG2	2932
						COL3A1	5490								COG3	4555
						COL4A1	6540								COG4	2820
						COL4A2	6446								COG5	4060
						COL4A5	6531								COG6	3574
						COL4A6	6685								COG7	2935
						COL5A1	8442								COG8	4629
						COL5A2	6829								COIL	2634
						COL6A1	4203								COL14A1	8009
						COL6A2	3445								COL18A1	5408
						COL7A1	9231								COL1A1	5914
						COLEC12	5724								COL25A1	7713
						COLGALT1	3647								COL26A1	2978
						COLGALT2	5179								COL27A1	7813
						COMMD1	695								COL3A1	5490
						COMMD10	1435								COL4A1	6540
						COMMD2	3694								COL4A2	6446
						COMMD3	926								COL4A5	6531
						COMMD4	895								COL4A6	6685
						COMMD5	1430								COL5A1	8442
						COMMD6	1669								COL5A2	6829
						COMMD7	1362								COL6A1	4203
						COMMD8	1461								COL6A2	3445
						COMMD9	2949								COLEC12	5724
						COMT	2272								COLGALT1	3647
						COMTD1	1250								COLGALT2	5179
						COP1	2826								COMMD1	695
						COPA	5318								COMMD10	1435
						COPB1	3336								COMMD2	3694
						COPB2	3275								COMMD3	926
						COPE	1131								COMMD4	895
						COPG1	3078								COMMD5	1430
						COPG2	3134								COMMD6	1669
						COPRS	868								COMMD7	1362
						COPS2	6576								COMMD8	1461
						COPS3	1814								COMMD9	2949
						COPS4	1651								COMT	2272
						COPS5	1296								COMTD1	1250
						COPS6	1404								COP1	2826
						COPS7A	1831								COPA	5318
						COPS7B	2513								COPB1	3336
						COPS8	3438								COPB2	3275
						COPS9	418								COPE	1131
						COPZ1	1890								COPG1	3078
						COQ10A	1570								COPG2	3134
						COQ10B	2112								COPRS	868
						COQ2	1525								COPS2	6576
						COQ3	1325								COPS3	1814
						COQ4	1245								COPS4	1651
						COQ5	1506								COPS5	1296
						COQ6	2109								COPS6	1404
						COQ7	2642								COPS7A	1831
						COQ8B	2443								COPS7B	2513
						COQ9	1630								COPS8	3438
						CORO1B	4411								COPS9	418
						CORO1C	3814								COPZ1	1890
						CORO2A	5456								COQ10A	1570
						CORO6	2677								COQ10B	2112
						COTL1	1842								COQ2	1525
						COX10	2898								COQ3	1325
						COX11	3150								COQ4	1245
						COX14	484								COQ5	1506
						COX15	5030								COQ6	2109
						COX17	426								COQ7	2642
						COX18	6824								COQ8B	2443
						COX19	4839								COQ9	1630
						COX20	2295								CORO1B	4411
						COX4I1	763								CORO1C	3814
						COX5A	1173								CORO2A	5456
						COX5B	690								COTL1	1842
						COX6A1	537								COX10	2898
						COX6B1	488								COX11	3150
						COX6C	744								COX14	484
						COX7A2	462								COX15	5030
						COX7A2L	2282								COX17	426
						COX7B	2444								COX18	6824
						COX7C	629								COX19	4839
						COX8A	494								COX20	2295
						CPD	9372								COX4I1	763
						CPE	2582								COX5A	1173
						CPEB4	9418								COX5B	690
						CPLANE1	11302								COX6A1	537
						CPNE1	1952								COX6B1	488
						CPNE2	2601								COX6C	744
						CPNE3	4857								COX7A2	462
						CPNE7	2442								COX7A2L	2282
						CPNE8	3431								COX7B	2444
						CPOX	2709								COX7C	629
						CPS1	5760								COX8A	494
						CPSF1	4480								CPD	9372
						CPSF2	13003								CPE	2582
						CPSF3	2259								CPEB2	7069
						CPSF4	1823								CPEB4	9418
						CPSF6	6584								CPLANE1	11302
						CPSF7	3487								CPNE1	1952
						CPT1A	5238								CPNE2	2601
						CPT1C	2846								CPNE3	4857
						CPT2	2699								CPNE8	3431
						CPTP	2154								CPOX	2709
						CPVL	2087								CPS1	5760
						CRABP2	974								CPSF1	4480
						CRACD	7044								CPSF2	13003
						CRACR2A	2704								CPSF3	2259
						CRAMP1	7972								CPSF4	1823
						CRAT	2768								CPSF6	6584
						CRBN	2187								CPSF7	3487
						CRCP	2774								CPT1A	5238
						CREB1	10095								CPT1C	2846
						CREB3	1496								CPT2	2699
						CREB3L2	7441								CPTP	2154
						CREB3L4	1749								CPVL	2087
						CREB5	8539								CRABP2	974
						CREBBP	10790								CRACD	7044
						CREBL2	3770								CRACR2A	2704
						CREBRF	7778								CRAMP1	7972
						CREBZF	7140								CRAT	2768
						CREG1	1969								CRBN	2187
						CRELD2	1428								CRCP	2774
						CREM	2857								CREB1	10095
						CRIM1	N/A								CREB3	1496
						CRIPT	6323								CREB3L2	7441
						CRISPLD1	4297								CREB3L4	1749
						CRK	3850								CREB5	8539
						CRKL	5342								CREBBP	10790
						CRLF3	2873								CREBL2	3770
						CRNKL1	4015								CREBRF	7778
						CROCC	6660								CREBZF	7140
						CROT	3205								CREG1	1969
						CRTAP	6595								CRELD2	1428
						CRTC1	6879								CREM	2857
						CRTC2	2631								CRIM1	N/A
						CRTC3	5214								CRIPT	6323
						CRY1	2987								CRISPLD1	4297
						CRY2	4131								CRK	3850
						CRYBG3	10779								CRKL	5342
						CRYGD	642								CRLF3	2873
						CRYL1	1483								CRLS1	3925
						CRYZ	1908								CRNKL1	4015
						CRYZL1	1598								CROCC	6660
						CS	2915								CROT	3205
						CSAG2	855								CRTAP	6595
						CSAG3	844								CRTC1	6879
						CSDE1	4097								CRTC2	2631
						CSE1L	3550								CRTC3	5214
						CSGALNACT2	3765								CRY1	2987
						CSK	2743								CRY2	4131
						CSNK1A1	5360								CRYBG3	10779
						CSNK1D	3681								CRYGD	642
						CSNK1E	2817								CRYL1	1483
						CSNK1G1	8085								CRYZ	1908
						CSNK1G2	2895								CRYZL1	1598
						CSNK1G3	4665								CS	2915
						CSNK2A1	12984								CSAG2	855
						CSNK2A2	1887								CSAG3	844
						CSNK2B	1061								CSDE1	4097
						CSPG4	8290								CSE1L	3550
						CSPG5	2154								CSGALNACT2	3765
						CSPP1	4859								CSK	2743
						CSRNP1	3164								CSNK1A1	5360
						CSRNP2	4517								CSNK1D	3681
						CSRNP3	11737								CSNK1E	2817
						CSRP2	908								CSNK1G1	8085
						CST3	793								CSNK1G2	2895
						CSTB	588								CSNK1G3	4665
						CSTF1	4032								CSNK2A1	12984
						CSTF2	2570								CSNK2A2	1887
						CSTF2T	4110								CSNK2B	1061
						CSTF3	2812								CSPG4	8290
						CT45A10	869								CSPG5	2154
						CTBP1	2488								CSPP1	4859
						CTBP2	8471								CSRNP1	3164
						CTBS	6571								CSRNP2	4517
						CTC1	7039								CSRNP3	11737
						CTCF	3814								CSRP2	908
						CTDNEP1	1767								CST3	793
						CTDP1	N/A								CSTB	588
						CTDSP1	2525								CSTF1	4032
						CTDSP2	4785								CSTF2	2570
						CTDSPL	4753								CSTF2T	4110
						CTDSPL2	6433								CSTF3	2812
						CTH	2090								CT45A10	869
						CTIF	5765								CTBP1	2488
						CTNNA1	3754								CTBP2	8471
						CTNNAL1	2454								CTBS	6571
						CTNNB1	3661								CTC1	7039
						CTNNBIP1	3006								CTCF	3814
						CTNNBL1	1890								CTDNEP1	1767
						CTNND1	6670								CTDP1	N/A
						CTNS	4139								CTDSP1	2525
						CTPS1	2840								CTDSP2	4785
						CTPS2	3953								CTDSPL	4753
						CTR9	4330								CTDSPL2	6433
						CTSA	1858								CTH	2090
						CTSB	3732								CTIF	5765
						CTSC	1870								CTNNA1	3754
						CTSD	2055								CTNNAL1	2454
						CTSF	2044								CTNNB1	3661
						CTSH	2145								CTNNBIP1	3006
						CTSL	1654								CTNNBL1	1890
						CTSV	4359								CTNND1	6670
						CTSZ	1502								CTNS	4139
						CTTN	2247								CTPS1	2840
						CTTNBP2	5904								CTPS2	3953
						CTTNBP2NL	5864								CTR9	4330
						CTU1	2126								CTSA	1858
						CTU2	1721								CTSB	3732
						CUEDC1	3710								CTSC	1870
						CUEDC2	1100								CTSD	2055
						CUL1	3147								CTSF	2044
						CUL2	4183								CTSH	2145
						CUL3	6756								CTSL	1654
						CUL4A	5821								CTSV	4359
						CUL4B	5915								CTSZ	1502
						CUL5	6171								CTTN	2247
						CUL7	5406								CTTNBP2	5904
						CUL9	7759								CTTNBP2NL	5864
						CUTA	937								CTU1	2126
						CUTC	1332								CTU2	1721
						CUX1	13723								CTXN1	1237
						CWC15	1522								CUEDC1	3710
						CWC22	3524								CUEDC2	1100
						CWC25	3234								CUL1	3147
						CWC27	2065								CUL2	4183
						CWF19L1	2591								CUL3	6756
						CWF19L2	3244								CUL4A	5821
						CXADR	5593								CUL4B	5915
						CXCL16	2324								CUL5	6171
						CXCR4	1668								CUL7	5406
						CXorf38	4244								CUL9	7759
						CXXC1	2320								CUTA	937
						CXXC5	2601								CUTC	1332
						CYB561	2929								CUX1	13723
						CYB561A3	2584								CWC15	1522
						CYB561D1	4912								CWC22	3524
						CYB561D2	1142								CWC25	3234
						CYB5A	3231								CWC27	2065
						CYB5B	4262								CWF19L1	2591
						CYB5D2	1969								CWF19L2	3244
						CYB5R1	1624								CXADR	5593
						CYB5R3	2916								CXCL16	2324
						CYB5R4	9205								CXCR4	1668
						CYB5RL	6193								CXorf38	4244
						CYBA	692								CXXC1	2320
						CYBC1	2073								CXXC5	2601
						CYBRD1	4235								CYB561	2929
						CYC1	1191								CYB561A3	2584
						CYCS	5432								CYB561D1	4912
						CYFIP1	N/A								CYB561D2	1142
						CYFIP2	6452								CYB5A	3231
						CYLD	8540								CYB5B	4262
						CYP20A1	10552								CYB5D2	1969
						CYP2R1	2214								CYB5R1	1624
						CYP2S1	2612								CYB5R3	2916
						CYP2U1	4768								CYB5R4	9205
						CYP4V2	4657								CYB5RL	6193
						CYREN	1494								CYBA	692
						CYRIB	3904								CYBC1	2073
						CYSTM1	790								CYBRD1	4235
						CYTH1	3290								CYC1	1191
						CYTH2	4443								CYCS	5432
						CYTH3	4482								CYFIP1	N/A
						CZIB	1102								CYFIP2	6452
						D2HGDH	2566								CYLD	8540
						DAAM1	5890								CYP20A1	10552
						DAAM2	6185								CYP26B1	4556
						DAB2	4345								CYP2R1	2214
						DAB2IP	6744								CYP2S1	2612
						DACH1	5245								CYP2U1	4768
						DAD1	684								CYP4V2	4657
						DAG1	5387								CYREN	1494
						DAGLB	2839								CYRIB	3904
						DALRD3	1748								CYSTM1	790
						DAP	2301								CYTH1	3290
						DAP3	2056								CYTH2	4443
						DAPK1	5912								CYTH3	4482
						DAPK3	2286								CZIB	1102
						DARS1	3099								D2HGDH	2566
						DARS2	3336								DAAM1	5890
						DAXX	2614								DAAM2	6185
						DAZAP1	2184								DAB2	4345
						DAZAP2	2064								DAB2IP	6744
						DBF4	3655								DACH1	5245
						DBF4B	3015								DAD1	684
						DBI	564								DAG1	5387
						DBN1	3024								DAGLB	2839
						DBNDD1	2056								DALRD3	1748
						DBNL	9869								DAP	2301
						DBR1	2662								DAP3	2056
						DBT	10799								DAPK1	5912
						DCAF1	5649								DAPK3	2286
						DCAF10	7906								DARS1	3099
						DCAF11	4299								DARS2	3336
						DCAF12	3592								DAXX	2614
						DCAF13	1970								DAZAP1	2184
						DCAF15	2278								DAZAP2	2064
						DCAF16	4547								DBF4	3655
						DCAF17	5853								DBF4B	3015
						DCAF4	2474								DBI	564
						DCAF5	5946								DBN1	3024
						DCAF6	3486								DBNDD1	2056
						DCAF7	6324								DBNL	9869
						DCAF8	3867								DBP	2170
						DCAKD	2171								DBR1	2662
						DCBLD1	3614								DBT	10799
[truncated: 8,104 more rows]
[truncated: 1 more columns]
