# Supplementary material for: Mutation at the Site of Hydroxylation in the Ribosomal Protein uL15 (RPL27a) Causes Specific Changes in the Repertoire of mRNAs Translated in Mammalian Cells
Source: Int J Mol Sci. 2023 Mar 24;24(7):6173. doi: 10.3390/ijms24076173 (PMC10094517; doi:10.3390/ijms24076173)
Supplement: Supplementary file 1 [file ijms-24-06173-s001.zip › Table S6.xlsx]

## Sheet: CDS
tDEGs up	CDS_length		tDEGs down	CDS_length		all genes, baseMean>100	CDS_length		pDEGs up	CDS_length		pDEGs down	CDS_length		all genes, baseMean>100	CDS_length
ACOT8	960		ABCB1	3843		AAAS	1641		ALG3	1317		AASS	2781		AAAS	1641
ATG101	657		ABHD3	1230		AACS	2019		ATP5F1E	156		ACTN4	2736		AACS	2019
ATOX1	207		ACTN1	2745		AADAT	1278		ATP5MC1	411		AGO1	2574		AADAT	1278
ATP5F1E	156		AFF4	3492		AAGAB	948		ATP5MC2	426		AHNAK	17673		AAGAB	948
ATP5MC3	429		AHDC1	4812		AAK1	2886		ATP5MC3	429		ANKRD10	1263		AAK1	2886
ATP5ME	210		ALDH9A1	1557		AAMDC	369		ATP6V0B	618		ARHGAP35	4500		AAMDC	369
ATP5MK	177		ANKRD28	3252		AAMP	1305		ATP6V0E1	246		CAD	6678		AAMP	1305
ATP6V1E1	681		AP2A2	2754		AAR2	1155		ATP6V1F	360		CHD8	7746		AAR2	1155
ATP6V1G1	357		APEX2	1557		AARS1	2907		ATRAID	690		CLTC	5028		AARS1	2907
BRK1	228		ASAP1	3390		AARS2	2958		BCAP31	741		COL3A1	4401		AARS2	2958
CBX3	552		ASB13	837		AASDH	3297		BCDIN3D	879		COL4A2	5139		AASDH	3297
CEP83	2106		ATRIP	2376		AASDHPPT	930		BOLA2B	261		COL5A1	5517		AASDHPPT	930
CHRAC1	396		BCAS3	2742		AASS	2781		BPHL	876		CREBBP	7329		AASS	2781
COMMD4	600		BLOC1S5	564		AATF	1683		CD151	762		CREBZF	1065		AATF	1683
COMMD6	258		BMS1	3849		ABCA2	7311		CD320	849		CTNND1	2907		ABCA2	7311
COX18	1005		BRD3	2181		ABCA3	5115		CDK1	894		DCAF16	651		ABCA3	5115
COX5B	390		BRI3BP	756		ABCA5	4929		CDKN2A	471		DENND3	3837		ABCA5	4929
COX7C	192		BUB1B	3153		ABCA7	6441		CENPB	1800		DHX8	3663		ABCA7	6441
DYNC2LI1	1056		CARNMT1	1230		ABCB1	3843		CKS2	240		DIAPH1	3819		ABCB1	3843
DYRK4	1905		CCND1	888		ABCB10	2217		CLIC1	726		DNMT1	4899		ABCB10	2217
EDF1	447		CENPL	1035		ABCB7	2259		CLTB	690		DYNC1H1	13941		ABCB7	2259
EEF1B2	678		CLDN12	735		ABCB8	2157		COMMD6	258		EIF4G1	4800		ABCB8	2157
EXTL2	993		CLUH	4047		ABCB9	2301		COMMD8	552		EP400	9372		ABCB9	2301
FAM102B	1083		COL5A2	4500		ABCC1	4596		COQ2	1116		FAM160B2	n/a		ABCC1	4596
FAM229B	243		CPVL	1431		ABCC10	4479		COX6B1	261		FANCD2	4356		ABCC10	4479
FAU	402		CTPS2	1761		ABCC4	3978		COX7A2L	345		FLNB	7809		ABCC4	3978
FSD1	1491		CTTNBP2	4992		ABCC5	4314		CUTA	597		FYCO1	4437		ABCC5	4314
GAS2L3	2085		DDX31	2241		ABCC6	4512		CYB561D2	669		GOLGA8A	1812		ABCC6	4512
GGPS1	903		DNAJB4	1014		ABCD1	2238		CYC1	978		GPATCH8	4509		ABCD3	1980
GNB4	1023		DNAJC13	6732		ABCD3	1980		DAD1	342		GXYLT1	1323		ABCD4	1821
GPC6	1668		DOCK7	6423		ABCD4	1821		DCXR	735		HCFC1	6108		ABCE1	1800
H2BC11	381		ERBB3	4029		ABCE1	1800		DDX39A	1284		HDAC6	3648		ABCF1	2538
HEY2	1014		FADS1	1506		ABCF1	2538		DEF8	1356		HECTD4	13257		ABCF2	1872
HINT1	381		FAM171B	2481		ABCF2	1872		DHRS4	837		HOXD10	1023		ABCF3	2130
HPS6	2328		FAM193B	2469		ABCF3	2130		DRAM2	801		HUWE1	13125		ABHD10	921
HRAS	570		FKBP9	1713		ABHD10	921		ECH1	987		KIAA0319L	3150		ABHD11	921
HSBP1	231		FLCN	1740		ABHD11	921		ECI2	1185		KIAA1671	5421		ABHD12	1197
IFITM1	378		FNTB	1314		ABHD12	1197		EDF1	447		KMT2D	16614		ABHD13	1014
ITGB3BP	534		FOXRED2	2055		ABHD13	1014		EEF1A1	1389		LRRC37A2	5103		ABHD14A	816
KLHL2	1782		GRIPAP1	2526		ABHD14B	633		EEF1B2	678		MACF1	22668		ABHD14B	633
LAMTOR5	276		GVQW3	564		ABHD15	1407		EEF1D	1944		MAP4	6891		ABHD15	1407
LSM3	309		HECTD1	7833		ABHD17A	933		EIF3K	657		MDN1	16791		ABHD17A	933
MBIP	1035		HLCS	2622		ABHD17B	867		EIF3L	1695		MKI67	9771		ABHD17B	867
MCTS1	549		HOOK1	2187		ABHD17C	990		EIF6	738		MLXIP	2760		ABHD17C	990
MPG	882		IKZF5	1260		ABHD18	1395		EIPR1	1164		MPP3	1758		ABHD18	1395
MROH8	3129		KANK1	4059		ABHD2	1278		ERAL1	1314		MSI2	987		ABHD2	1278
MRPL27	447		KANSL1	3318		ABHD3	1230		ESD	849		MTOR	7650		ABHD3	1230
MRPL47	753		KIF13A	5418		ABHD4	1029		FAR2	1548		MTR	3798		ABHD4	1029
MRPL57	309		KIF1A	5376		ABHD5	1050		FARSA	1527		MYH10	6024		ABHD5	1050
MRPS14	387		KIFAP3	2379		ABHD6	1014		FDFT1	1254		MYO15B	9291		ABHD6	1014
MRPS21	264		KLHL9	1854		ABI1	1446		FIS1	459		NPIPA7	1110		ABI1	1446
MSRB1	351		LINS1	2274		ABI2	1629		FRG1	777		NPIPB11	3486		ABI2	1629
NDUFA1	213		LRRC37A	5103		ABITRAM	546		GALK1	1179		NPIPB12	753		ABITRAM	546
NDUFA3	255		MAP2K6	1005		ABL1	3393		GCAT	1260		NPIPB13	3417		ABL1	3393
NDUFA4	246		MARS1	2703		ABL2	3549		GFUS	966		NPIPB4	3162		ABL2	3549
NDUFB9	540		MBD5	5184		ABLIM1	2337		GHITM	1038		OGT	3141		ABLIM1	2337
NDUFS5	321		MDN1	16791		ABR	2580		GNG5	207		PABPC4	1983		ABR	2580
ORC4	1311		MED14	4365		ABRACL	246		GPX1	612		POGZ	4233		ABRACL	246
PDCD5	378		MED7	702		ABRAXAS1	1230		GSTZ1	651		PPARA	1407		ABRAXAS1	1230
PDE9A	1782		MFHAS1	3159		ABRAXAS2	1248		GTPBP6	1551		PPFIA4	3624		ABRAXAS2	1248
PFDN4	405		MFN1	2226		ABT1	819		GUK1	594		PRKDC	12387		ABT1	819
PHPT1	378		MOGS	2514		ABTB2	3078		HIGD2A	321		RBM5	2448		ACAA1	1275
PIGW	1515		MPP2	1659		ACAA1	1275		HILPDA	192		RNF213	15624		ACAA2	1194
PIN4	396		MYBL1	2259		ACAA2	1194		HLA-F	1329		RPRD2	4386		ACACA	7152
POC1B	1437		NAA25	2919		ACACA	7152		HSPBP1	1080		RPS17	411		ACACB	7377
POMP	426		NBPF1	3420		ACACB	7377		ID2	405		RRBP1	4233		ACAD10	3180
PPIL3	486		NBPF10	11388		ACAD10	3180		IGFBP2	978		SLC41A1	1542		ACAD8	1248
PRDM5	1893		NBPF11	2598		ACAD8	1248		ILVBL	1899		SLC7A1	1890		ACAD9	1866
PSMA7	747		NCS1	573		ACAD9	1866		INIP	315		SMARCC1	3318		ACADM	1266
PSMB7	834		NDUFB8	561		ACADM	1266		KLRG2	1230		SNRNP200	6411		ACADS	1239
PTRHD1	423		NSUN3	1023		ACADS	1239		LCMT1	1005		SPEN	10995		ACADSB	1299
RASA1	3144		NTN1	1815		ACADSB	1299		LSM7	312		SPTAN1	7434		ACADVL	1968
RB1	2787		OSBP	2424		ACADVL	1968		LY6E	444		SPTBN1	7095		ACAP2	2337
RBX1	327		PDP2	1590		ACAP2	2337		MACROD1	978		SRRM2	8259		ACAP3	2505
RPL10A	654		PHACTR4	2109		ACAP3	2505		MAPKAPK3	1149		THRAP3	2868		ACAT1	1284
RPL21	483		PMEPA1	864		ACAT1	1284		MECR	1122		TJP1	5307		ACAT2	1194
RPL24	474		POLR2J3	823		ACAT2	1194		MGST2	444		TNKS1BP1	5190		ACBD3	1587
RPL27	411		PRKAG2	1710		ACBD3	1587		MIF	348		TRIO	9294		ACBD4	918
RPL31	378		PRMT9	2538		ACBD4	918		MPV17	531		TTC28	7446		ACBD5	1578
RPL32	408		PUDP	687		ACBD5	1578		MRPL41	414		UBP1	1623		ACBD6	849
RPL35	372		RAB8A	624		ACBD6	849		MRPL44	999		VPS53	2499		ACBD7	267
RPL37	294		RARS2	1737		ACBD7	267		MT-CO2	684		WDR27	2688		ACD	1377
RPL37A	279		RASL11A	729		ACD	1377		MYDGF	522		ZBTB47	2244		ACER3	804
RPL38	213		RECQL5	2976		ACER3	804		MZT2A	477		ZBTB7A	1755		ACIN1	3852
RPL39	156		RETREG1	1494		ACIN1	3852		MZT2B	477		ZCCHC14	3261		ACLY	3306
RPL41	78		RIC8A	1596		ACLY	3306		NCAPH2	1818		ZNF142	5664		ACO1	2670
RPL7	747		RNF8	1458		ACO1	2670		NDUFA11	426		ZNF555	1887		ACO2	2343
RPS12	399		RPA2	813		ACO2	2343		NDUFB7	414		ZNF592	3804		ACOT1	1266
RPS13	456		RSF1	4326		ACOT1	1266		NDUFS7	642		ZNF821	1239		ACOT13	423
RPS14	456		RTL10	1095		ACOT13	423		NLE1	1458			3804		ACOT2	1452
RPS16	441		SCAMP2	990		ACOT2	1452		NOA1	2097					ACOT7	1113
RPS19BP1	411		SDHA	1995		ACOT7	1113		NOB1	1239					ACOT8	960
RPS20	360		SEMA4F	2313		ACOT8	960		NOSIP	906					ACOT9	1347
RPS21	252		SF3B2	2688		ACOT9	1347		NPM3	537					ACOX1	1983
RPS23	432		SKI	2187		ACOX1	1983		NTHL1	915					ACOX3	2103
RPS24	393		SLC18B1	1371		ACOX3	2103		NUBP1	963					ACP1	477
RPS25	378		SNAI2	807		ACP1	477		NUDT1	471					ACP2	1272
RPS27	255		SNX27	1626		ACP2	1272		OST4	114					ACP6	1287
RPS29	171		SPATA2	1563		ACP6	1287		OSTC	450					ACSF2	1848
RPS3A	795		SUPT20H	2340		ACSF2	1848		OXA1L	1308					ACSF3	1731
RPS5	615		SUPV3L1	2361		ACSF3	1731		OXLD1	444					ACSL1	2097
RPS7	585		TEX10	2790		ACSL1	2097		PAFAH1B3	696					ACSL3	2163
SAP18	519		TMEM43	1203		ACSL3	2163		PARK7	570					ACSL4	2013
SEM1	213		TMEM65	723		ACSL4	2013		PCNA	786					ACSS1	2070
SFR1	738		TOR1AIP2	1413		ACSL6	2169		PDPN	489					ACSS2	2106
SFT2D1	480		TRIM3	2235		ACSS1	2070		PEF1	855					ACTA2	1134
SH3BGRL	345		TUBGCP6	5460		ACSS2	2106		PHB	n/a					ACTB	1128
SKA2	366		UNC119	723		ACTA2	1134		PIN1	492					ACTG1	1128
SMIM26	288		USP12	1113		ACTB	1128		PLAG1	1503					ACTL6A	1290
SNRPE	279		USPL1	3279		ACTG1	1128		POLR1H	381					ACTN1	2745
SNRPG	231		VCPIP1	3669		ACTL6A	1290		PPA1	870					ACTN2	2685
SNX2	1560		WDR5	1005		ACTN1	2745		PPP1CA	993					ACTN4	2736
SUB1	384		WDR77	1029		ACTN2	2685		PPP1R35	762					ACTR10	1254
SVIP	234		ZDHHC5	2148		ACTN4	2736		PRADC1	567					ACTR1A	1131
TAF1D	837		ZDHHC7	927		ACTR10	1254		PRDX5	645					ACTR1B	1131
TCEAL9	315		ZMYM3	4113		ACTR1A	1131		PRELID1	660					ACTR2	1185
TEDC1	1488		ZNF100	1629		ACTR1B	1131		PRMT1	1116					ACTR3	1257
THAP12	2286		ZNF333	1998		ACTR2	1185		PRPS1	957					ACTR3B	1257
TMEM128	498		ZNF512	1704		ACTR3	1257		PSMA6	741					ACTR5	1824
TMEM258	240		ZNF605	1926		ACTR3B	1257		PSMA7	747					ACTR6	1191
TOMM7	168		ZNF616	2346		ACTR5	1824		PSMB2	606					ACTR8	1875
TPGS1	873		ZNF830	1119		ACTR6	1191		PSMB4	795					ACVR1	1530
TPRKB	528			2128.5		ACTR8	1875		PSMB5	792					ACVR1B	1518
TRAPPC6A	480					ACVR1	1530		PSMD4	1134					ACVR2A	1542
TRIP4	1746					ACVR1B	1518		QARS1	2328					ACVR2B	1539
UQCC2	381					ACVR2A	1542		RACK1	954					ACYP1	300
UQCRB	336					ACVR2B	1539		RAN	651					ADA	1092
UROD	1104					ACYP1	300		RBIS	303					ADAL	1068
USF3	6738					ADA	1092		RNASEH2C	495					ADAM10	2247
USP37	2940					ADAL	1068		RPA2	813					ADAM11	2310
WDR61	918					ADAM10	2247		RPL10	645					ADAM15	2592
YPEL5	366					ADAM11	2310		RPL10A	654					ADAM17	2475
ZNF75D	1533					ADAM15	2592		RPL13	636					ADAM19	2757
	441					ADAM17	2475		RPL13A	612					ADAM22	2895
						ADAM19	2757		RPL15	615					ADAM23	2499
						ADAM22	2895		RPL18	567					ADAM9	162
						ADAM23	2499		RPL18A	531					ADAMTS1	2904
						ADAM9	162		RPL19	591					ADAMTS13	4284
						ADAMTS1	2904		RPL23A	471					ADAMTS2	3636
						ADAMTS13	4284		RPL24	474					ADAMTS7	5061
						ADAP2	1146		RPL27	411					ADAP2	1146
						ADAR	3681		RPL27A	447					ADAR	3681
						ADARB1	2106		RPL28	414					ADARB1	2106
						ADAT1	1509		RPL29	480					ADAT1	1509
						ADAT2	576		RPL30	348					ADAT2	576
						ADCK1	1572		RPL31	378					ADCK2	1881
						ADCK2	1881		RPL32	408					ADCY1	3360
						ADCY1	3360		RPL35	372					ADCY3	3435
						ADCY3	3435		RPL35A	333					ADCY6	3507
						ADCY6	3507		RPL37	294					ADCY7	3243
						ADCY7	3243		RPL37A	279					ADCY9	4062
						ADCY9	4062		RPL39	156					ADCYAP1R1	1407
						ADCYAP1R1	1407		RPL41	78					ADD1	2400
						ADD1	2400		RPL7	747					ADD2	2181
						ADD2	2181		RPL7A	801					ADD3	2121
						ADD3	2121		RPL8	774					ADGRA2	4017
						ADGRA2	4017		RPL9	579					ADGRA3	3966
						ADGRA3	3966		RPLP0	954					ADGRB1	4755
						ADGRB1	4755		RPLP1	345					ADGRB2	4758
						ADGRB2	4758		RPLP2	348					ADGRE5	2508
						ADGRE5	2508		RPS11	477					ADGRG6	3753
						ADGRL1	4425		RPS12	399					ADGRL1	4425
						ADGRL2	4410		RPS13	456					ADGRL2	4410
						ADGRL3	4632		RPS14	456					ADGRL3	4632
						ADGRV1	18921		RPS15	438					ADGRV1	18921
						ADH5	1125		RPS16	441					ADH5	1125
						ADI1	300		RPS19	438					ADI1	300
						ADIPOR1	1128		RPS19BP1	411					ADIPOR1	1128
						ADIPOR2	1161		RPS2	882					ADIPOR2	1161
						ADK	1089		RPS20	360					ADK	1089
						ADNP	3309		RPS21	252					ADM	558
						ADNP2	3396		RPS23	432					ADNP	3309
						ADO	813		RPS25	378					ADNP2	3396
						ADORA2B	999		RPS27L	255					ADO	813
						ADPGK	1494		RPS28	210					ADORA2B	999
						ADPRM	1029		RPS29	171					ADPGK	1494
						ADPRS	1092		RPS3	732					ADPRHL1	5904
						ADRA2C	1389		RPS3A	795					ADPRM	1029
						ADRM1	1224		RPS5	615					ADPRS	1092
						ADSL	1455		RPS7	585					ADRA2C	1389
						ADSS2	1371		RPS9	585					ADRM1	1224
						AEBP2	1512		RPSA	888					ADSL	1455
						AEN	978		RSL24D1	492					ADSS1	1374
						AFAP1	2445		SCO2	801					ADSS2	1371
						AFAP1L1	2307		SERF2	180					AEBP2	1512
						AFDN	5496		SIGIRR	1233					AEN	978
						AFF1	3657		SIVA1	528					AFAP1	2445
						AFF4	3492		SLC25A3	1086					AFAP1L1	2307
						AFG1L	1446		SLC25A5	897					AFDN	5496
						AFG3L2	2394		SLC25A6	897					AFF1	3657
						AFMID	912		SLC35B1	969					AFF4	3492
						AFTPH	2811		SNX29	2442					AFG1L	1446
						AGA	1041		SRSF3	495					AFG3L2	2394
						AGAP1	2574		SSR4	522					AFMID	912
						AGAP2	3579		STOML2	1071					AFTPH	2811
						AGAP3	2736		SVBP	201					AGA	1041
						AGAP4	2061		TBRG4	1896					AGAP1	2574
						AGAP9	1977		TIMM8B	252					AGAP2	3579
						AGBL5	2661		TK1	705					AGAP3	2736
						AGFG1	1689		TMEM101	774					AGAP4	2061
						AGFG2	1446		TMEM126A	588					AGAP9	1977
						AGGF1	2145		TMEM141	327					AGBL5	2661
						AGK	681		TMEM183A	1131					AGFG1	1689
						AGL	4599		TMEM205	570					AGGF1	2145
						AGO1	2574		TMEM219	723					AGK	681
						AGO2	2580		TMEM230	552					AGL	4599
						AGO3	2583		TMEM9	552					AGO1	2574
						AGO4	2586		TMSB15A	138					AGO2	2580
						AGPAT1	852		TPGS1	873					AGO3	2583
						AGPAT2	837		TPT1	519					AGO4	2586
						AGPAT3	1131		TRAF3IP2	1698					AGPAT1	852
						AGPAT4	1137		TRIM21	1428					AGPAT2	837
						AGPAT5	1095		TSPO	510					AGPAT3	1131
						AGPS	1977		TSSC4	990					AGPAT4	1137
						AGRN	6138		TTC38	1410					AGPAT5	1095
						AGTPBP1	3681		TXN	318					AGPS	1977
						AGTRAP	480		TXNDC17	372					AGRN	6138
						AHCTF1	6801		UBA52	387					AGTPBP1	3681
						AHCY	1299		UBL5	222					AGTRAP	480
						AHCYL1	1593		UBXN1	894					AHCTF1	6801
						AHCYL2	1836		UQCC3	282					AHCY	1299
						AHDC1	4812		USE1	780					AHCYL1	1593
						AHI1	3591		VIPAS39	1482					AHCYL2	1836
						AHNAK	17673		VPS28	702					AHI1	3591
						AHNAK2	17388		VPS51	2349					AHNAK	17673
						AHSA1	1017		WARS2	1083					AHNAK2	17388
						AIDA	921		YIF1A	882					AHSA1	1017
						AIF1L	453		YIF1B	945					AIDA	921
						AIFM1	1842		ZMAT5	513					AIF1L	453
						AIFM2	1122			585					AIFM1	1842
						AIG1	717								AIFM2	1122
						AIMP1	939								AIG1	717
						AIMP2	963								AIMP1	939
						AIP	993								AIMP2	963
						AJUBA	1617								AIP	993
						AK2	720								AJUBA	1617
						AK3	684								AK2	720
						AK4	672								AK3	684
						AK6	519								AK4	672
						AK7	2172								AK6	519
						AKAP1	2712								AK7	2172
						AKAP10	1989								AKAP1	2712
						AKAP11	5706								AKAP10	1989
						AKAP12	5349								AKAP11	5706
						AKAP13	8442								AKAP12	5349
						AKAP17A	2088								AKAP13	8442
						AKAP5	1284								AKAP17A	2088
						AKAP8	2079								AKAP5	1284
						AKAP8L	1941								AKAP8	2079
						AKAP9	11724								AKAP8L	1941
						AKIP1	633								AKAP9	11724
						AKIRIN1	579								AKIP1	633
						AKIRIN2	612								AKIRIN1	579
						AKR1A1	978								AKIRIN2	612
						AKR1B1	951								AKR1A1	978
						AKR7A2	1080								AKR1B1	951
						AKT1	1443								AKR7A2	1080
						AKT1S1	771								AKT1	1443
						AKT2	1446								AKT1S1	771
						AKT3	1440								AKT2	1446
						AKTIP	879								AKT3	1440
						ALAD	993								AKTIP	879
						ALAS1	1923								ALAD	993
						ALCAM	1752								ALAS1	1923
						ALDH16A1	2409								ALCAM	1752
						ALDH18A1	2388								ALDH16A1	2409
						ALDH1A2	1557								ALDH18A1	2388
						ALDH1A3	1539								ALDH1A2	1557
						ALDH1B1	1554								ALDH1A3	1539
						ALDH1L2	2772								ALDH1B1	1554
						ALDH2	1554								ALDH1L2	2772
						ALDH3A2	1458								ALDH2	1554
						ALDH4A1	1692								ALDH3A2	1458
						ALDH5A1	1608								ALDH4A1	1692
						ALDH6A1	1608								ALDH5A1	1608
						ALDH7A1	1620								ALDH6A1	1608
						ALDH9A1	1557								ALDH7A1	1620
						ALDOA	1257								ALDH9A1	1557
						ALDOC	1095								ALDOA	1257
						ALG1	1395								ALDOC	1095
						ALG10	1422								ALG1	1395
						ALG10B	1422								ALG10	1422
						ALG11	1479								ALG10B	1422
						ALG12	1467								ALG11	1479
						ALG13	3414								ALG12	1467
						ALG14	651								ALG13	3414
						ALG2	1251								ALG14	651
						ALG3	1317								ALG2	1251
						ALG5	975								ALG3	1317
						ALG6	1524								ALG5	975
						ALG8	1581								ALG6	1524
						ALKBH1	1170								ALG8	1581
						ALKBH2	786								ALG9	1857
						ALKBH3	861								ALKBH1	1170
						ALKBH4	909								ALKBH2	786
						ALKBH5	1185								ALKBH3	861
						ALKBH7	666								ALKBH4	909
						ALKBH8	1995								ALKBH5	1185
						ALMS1	12507								ALKBH7	666
						ALPK1	3735								ALKBH8	1995
						ALPL	1575								ALMS1	12507
						ALS2	4974								ALPK1	3735
						ALX1	981								ALPL	1575
						ALX4	1236								ALS2	4974
						ALYREF	795								ALX1	981
						AMBRA1	3897								ALX4	1236
						AMD1	1005								ALYREF	795
						AMER1	3408								AMBRA1	3897
						AMFR	1932								AMD1	1005
						AMH	1683								AMER1	3408
						AMMECR1	1002								AMFR	1932
						AMMECR1L	933								AMH	1683
						AMN1	777								AMIGO1	1482
						AMOT	3255								AMMECR1	1002
						AMOTL1	2871								AMMECR1L	933
						AMOTL2	2343								AMOT	3255
						AMPD2	2478								AMOTL1	2871
						AMZ2	1083								AMOTL2	2343
						ANAPC1	5835								AMPD2	2478
						ANAPC10	558								AMZ2	1083
						ANAPC11	255								ANAPC1	5835
						ANAPC13	225								ANAPC10	558
						ANAPC15	366								ANAPC11	255
						ANAPC16	333								ANAPC13	225
						ANAPC2	2469								ANAPC15	366
						ANAPC4	2427								ANAPC16	333
						ANAPC5	2268								ANAPC2	2469
						ANAPC7	1698								ANAPC4	2427
						ANGEL1	2013								ANAPC5	2268
						ANGEL2	1635								ANAPC7	1698
						ANK1	5643								ANG	444
						ANK2	11874								ANGEL1	2013
						ANK3	13134								ANGEL2	1635
						ANKFY1	3510								ANK1	5643
						ANKH	1479								ANK2	11874
						ANKIB1	3270								ANK3	13134
						ANKLE2	2817								ANKFY1	3510
						ANKMY1	3093								ANKH	1479
						ANKMY2	1326								ANKIB1	3270
						ANKRA2	942								ANKLE2	2817
						ANKRD10	1263								ANKMY1	3093
						ANKRD11	7992								ANKMY2	1326
						ANKRD12	6189								ANKRA2	942
						ANKRD13A	1773								ANKRD10	1263
						ANKRD13B	1881								ANKRD11	7992
						ANKRD13C	1626								ANKRD12	6189
						ANKRD13D	1818								ANKRD13A	1773
						ANKRD16	1086								ANKRD13B	1881
						ANKRD17	7812								ANKRD13C	1626
						ANKRD18A	2979								ANKRD13D	1818
						ANKRD18B	3342								ANKRD16	1086
						ANKRD26	5133								ANKRD17	7812
						ANKRD27	3153								ANKRD18A	2979
						ANKRD28	3252								ANKRD18B	3342
						ANKRD33B	1485								ANKRD26	5133
						ANKRD36	5748								ANKRD27	3153
						ANKRD36B	4062								ANKRD28	3252
						ANKRD36C	6360								ANKRD33B	1485
						ANKRD39	552								ANKRD36	5748
						ANKRD40	1107								ANKRD36B	4062
						ANKRD42	1584								ANKRD36C	6360
						ANKRD44	2982								ANKRD39	552
						ANKRD46	687								ANKRD40	1107
						ANKRD49	720								ANKRD42	1584
						ANKRD50	4290								ANKRD46	687
						ANKRD52	3231								ANKRD49	720
						ANKRD54	903								ANKRD50	4290
						ANKRD6	2184								ANKRD52	3231
						ANKRD9	954								ANKRD54	903
						ANKS1A	3405								ANKRD6	2184
						ANKS3	1971								ANKRD9	954
						ANKS6	2616								ANKS1A	3405
						ANKZF1	2181								ANKS3	1971
						ANLN	3375								ANKS6	2616
						ANO10	1983								ANKZF1	2181
						ANO5	2742								ANLN	3375
						ANO6	2733								ANO10	1983
						ANO8	3699								ANO5	2742
						ANP32A	750								ANO6	2733
						ANP32B	756								ANP32A	750
						ANP32E	807								ANP32B	756
						ANTKMT	708								ANP32E	807
						ANTXR1	1695								ANTKMT	708
						ANXA1	1041								ANTXR1	1695
						ANXA11	1518								ANXA1	1041
						ANXA2	1020								ANXA11	1518
						ANXA4	966								ANXA2	1020
						ANXA5	963								ANXA4	966
						ANXA6	2022								ANXA5	963
						ANXA7	1401								ANXA6	2022
						AOPEP	2460								ANXA7	1401
						AP1AR	909								AOPEP	2460
						AP1B1	2850								AP1AR	909
						AP1G1	2469								AP1B1	2850
						AP1G2	2358								AP1G1	2469
						AP1M1	1272								AP1G2	2358
						AP1S1	477								AP1M1	1272
						AP1S2	483								AP1S1	477
						AP2A1	2868								AP1S2	483
						AP2A2	2754								AP2A1	2868
						AP2B1	2856								AP2A2	2754
						AP2M1	1308								AP2B1	2856
						AP2S1	429								AP2M1	1308
						AP3B1	3285								AP2S1	429
						AP3D1	3648								AP3B1	3285
						AP3M1	1257								AP3D1	3648
						AP3M2	1257								AP3M1	1257
						AP3S1	582								AP3M2	1257
						AP3S2	582								AP3S1	582
						AP4B1	2220								AP3S2	582
						AP4E1	3414								AP4B1	2220
						AP4M1	1362								AP4E1	3414
						AP5B1	2637								AP4M1	1362
						AP5M1	1473								AP5B1	2637
						AP5S1	603								AP5M1	1473
						AP5Z1	2424								AP5S1	603
						APAF1	3747								AP5Z1	2424
						APBA2	2250								APAF1	3747
						APBA3	1728								APBA2	2250
						APBB1	2133								APBA3	1728
						APBB2	2280								APBB1	2133
						APBB3	1461								APBB2	2280
						APC	8532								APBB3	1461
						APEH	2199								APC	8532
						APEX1	957								APEH	2199
						APEX2	1557								APEX1	957
						APH1A	798								APEX2	1557
						APH1B	774								APH1A	798
						API5	1575								APH1B	774
						APIP	729								API5	1575
						APLP1	1956								APIP	729
						APLP2	2256								APLP1	1956
						APMAP	1251								APLP2	2256
						APOBEC3B	1149								APMAP	1251
						APOBEC3C	573								APOBEC3B	1149
						APOBEC3F	1122								APOBEC3C	573
						APOC1	252								APOBEC3F	1122
						APOE	954								APOC1	252
						APOL2	1014								APOE	954
						APOO	597								APOL2	1014
						APOOL	807								APOO	597
						APP	2313								APOOL	807
						APPBP2	1758								APP	2313
						APPL1	2130								APPBP2	1758
						APPL2	1995								APPL1	2130
						APRT	543								APPL2	1995
						APTX	1029								APRT	543
						AQR	4458								APTX	1029
						ARAF	1821								AQR	4458
						ARAP1	4353								ARAF	1821
						ARAP3	4635								ARAP1	4353
						ARCN1	1536								ARCN1	1536
						AREL1	2472								AREL1	2472
						ARF1	546								ARF1	546
						ARF3	546								ARF3	546
						ARF4	543								ARF4	543
						ARF5	543								ARF5	543
						ARF6	528								ARF6	528
						ARFGAP1	1221								ARFGAP1	1221
						ARFGAP2	1566								ARFGAP2	1566
						ARFGAP3	1551								ARFGAP3	1551
						ARFGEF1	5550								ARFGEF1	5550
						ARFGEF2	5358								ARFGEF2	5358
						ARFGEF3	6534								ARFGEF3	6534
						ARFIP1	1122								ARFIP1	1122
						ARFIP2	1026								ARFIP2	1026
						ARFRP1	606								ARFRP1	606
						ARG2	1065								ARG2	1065
						ARGLU1	822								ARGLU1	822
						ARHGAP1	1320								ARHGAP1	1320
						ARHGAP10	2361								ARHGAP10	2361
						ARHGAP11A	3072								ARHGAP11A	3072
						ARHGAP12	2541								ARHGAP12	2541
						ARHGAP17	2646								ARHGAP17	2646
						ARHGAP18	1992								ARHGAP18	1992
						ARHGAP19	1485								ARHGAP19	1485
						ARHGAP21	5877								ARHGAP21	5877
						ARHGAP22	2097								ARHGAP22	2097
						ARHGAP26	2280								ARHGAP26	2280
						ARHGAP27	2670								ARHGAP27	2670
						ARHGAP29	3786								ARHGAP29	3786
						ARHGAP31	4335								ARHGAP31	4335
						ARHGAP32	6306								ARHGAP32	6306
						ARHGAP35	4500								ARHGAP35	4500
						ARHGAP39	3345								ARHGAP39	3345
						ARHGAP42	2625								ARHGAP42	2625
						ARHGAP5	4509								ARHGAP44	2457
						ARHGDIA	615								ARHGAP5	4509
						ARHGDIG	678								ARHGDIA	615
						ARHGEF1	2739								ARHGDIG	678
						ARHGEF10L	3840								ARHGEF1	2739
						ARHGEF11	4689								ARHGEF10L	3840
						ARHGEF12	4635								ARHGEF11	4689
						ARHGEF17	6192								ARHGEF12	4635
						ARHGEF18	4086								ARHGEF17	6192
						ARHGEF2	2961								ARHGEF18	4086
						ARHGEF25	1743								ARHGEF2	2961
						ARHGEF26	2616								ARHGEF25	1743
						ARHGEF3	1581								ARHGEF26	2616
						ARHGEF39	1008								ARHGEF3	1581
						ARHGEF4	5631								ARHGEF39	1008
						ARHGEF40	4560								ARHGEF4	5631
						ARHGEF6	2331								ARHGEF40	4560
						ARHGEF7	2589								ARHGEF6	2331
						ARHGEF9	1572								ARHGEF7	2589
						ARID1A	6858								ARHGEF9	1572
						ARID1B	7119								ARID1A	6858
						ARID2	5508								ARID1B	7119
						ARID3A	1782								ARID2	5508
						ARID3B	1683								ARID3A	1782
						ARID4A	3774								ARID3B	1683
						ARID4B	3939								ARID4A	3774
						ARID5A	1785								ARID4B	3939
						ARID5B	3567								ARID5A	1785
						ARIH1	1674								ARID5B	3567
						ARIH2	1482								ARIH1	1674
						ARL1	546								ARIH2	1482
						ARL10	735								ARL1	546
						ARL13B	1287								ARL10	735
						ARL14EP	783								ARL13B	1287
						ARL15	615								ARL14EP	783
						ARL16	522								ARL15	615
						ARL17A	534								ARL16	522
						ARL17B	546								ARL17A	534
						ARL2	555								ARL17B	546
						ARL2BP	492								ARL2	555
						ARL3	549								ARL2BP	492
						ARL4A	603								ARL3	549
						ARL4C	606								ARL4A	603
						ARL4D	606								ARL4C	606
						ARL5A	540								ARL4D	606
						ARL5B	540								ARL5A	540
						ARL6	561								ARL5B	540
						ARL6IP1	612								ARL6	561
						ARL6IP5	567								ARL6IP1	612
						ARL6IP6	681								ARL6IP5	567
						ARL8A	561								ARL6IP6	681
						ARL8B	561								ARL8A	561
						ARMC1	849								ARL8B	561
						ARMC10	639								ARMC1	849
						ARMC5	2808								ARMC10	639
						ARMC6	1506								ARMC6	1506
						ARMC7	597								ARMC7	597
						ARMC8	2022								ARMC8	2022
						ARMC9	2457								ARMC9	2457
						ARMCX3	1140								ARMCX3	1140
						ARMCX5	1677								ARMCX5	1677
						ARMCX6	903								ARMCX6	903
						ARMH3	2070								ARMH3	2070
						ARMT1	1326								ARMH4	2325
						ARNT	2370								ARMT1	1326
						ARNT2	2154								ARNT	2370
						ARNTL	1881								ARNT2	2154
						ARNTL2	1911								ARNTL2	1911
						ARPC1A	1113								ARPC1A	1113
						ARPC2	903								ARPC2	903
						ARPC3	537								ARPC3	537
						ARPC4	507								ARPC4	507
						ARPC5	456								ARPC5	456
						ARPC5L	462								ARPC5L	462
						ARPIN	681								ARPIN	681
						ARPP19	339								ARPP19	339
						ARRB1	1257								ARRB1	1257
						ARRB2	1230								ARRB2	1230
						ARRDC1	1302								ARRDC1	1302
						ARRDC2	1224								ARRDC2	1224
						ARRDC3	1245								ARRDC3	1245
						ARRDC4	1257								ARRDC4	1257
						ARSA	1530								ARSA	1530
						ARSB	1602								ARSB	1602
						ARSK	1611								ARSK	1611
						ARV1	816								ARV1	816
						ARVCF	2889								ARVCF	2889
						ASAH1	1188								ASAH1	1188
						ASAH2	2343								ASAH2	2343
						ASAH2B	483								ASAH2B	483
						ASAP1	3390								ASAP1	3390
						ASAP2	3021								ASAP2	3021
						ASAP3	2712								ASAP3	2712
						ASB1	1008								ASB1	1008
						ASB13	837								ASB13	837
						ASB3	1557								ASB3	1557
						ASB6	1266								ASB6	1266
						ASB7	957								ASB7	957
						ASB8	867								ASB8	867
						ASCC1	1074								ASCC1	1074
						ASCC2	2274								ASCC2	2274
						ASCC3	6609								ASCC3	6609
						ASF1A	615								ASF1A	615
						ASF1B	609								ASF1B	609
						ASH1L	8895								ASH1L	8895
						ASH2L	1887								ASH2L	1887
						ASIC1	1587								ASIC1	1587
						ASL	1395								ASL	1395
						ASMTL	1866								ASMTL	1866
						ASNS	1686								ASNSD1	1932
						ASNSD1	1932								ASPH	2277
						ASPH	2277								ASPHD2	1110
						ASPHD2	1110								ASPM	10434
						ASPM	10434								ASPSCR1	1662
						ASPSCR1	1662								ASRGL1	927
						ASRGL1	927								ASS1	1239
						ASS1	1239								ASTE1	2040
						ASTE1	2040								ASXL1	4626
						ASXL1	4626								ASXL2	4308
						ASXL2	4308								ATAD1	1086
						ATAD1	1086								ATAD2	4173
						ATAD2	4173								ATAD2B	4377
						ATAD2B	4377								ATAD3A	1761
						ATAD3A	1761								ATAD3B	1947
						ATAD3B	1947								ATAD5	5535
						ATAD5	5535								ATAT1	1266
						ATAT1	1266								ATE1	1557
						ATE1	1557								ATF1	816
						ATF1	816								ATF2	1518
						ATF2	1518								ATF3	546
						ATF3	546								ATF4	1056
						ATF4	1056								ATF5	849
						ATF5	849								ATF6	2013
						ATF6	2013								ATF6B	2112
						ATF6B	2112								ATF7	1452
						ATF7	1452								ATF7IP	3813
						ATF7IP	3813								ATG10	663
						ATG101	657								ATG101	657
						ATG12	423								ATG12	423
						ATG13	1653								ATG13	1653
						ATG14	1479								ATG14	1479
						ATG16L1	1875								ATG16L1	1875
						ATG16L2	1860								ATG16L2	1860
						ATG2A	5817								ATG2A	5817
						ATG2B	6237								ATG2B	6237
						ATG3	945								ATG3	945
						ATG4A	1197								ATG4A	1197
						ATG4B	1182								ATG4B	1182
						ATG4C	1377								ATG4C	1377
						ATG4D	1425								ATG4D	1425
						ATG5	828								ATG5	828
						ATG7	2112								ATG7	2112
						ATG9A	2520								ATG9A	2520
						ATIC	1779								ATIC	1779
						ATL1	1677								ATL2	1752
						ATL2	1752								ATL3	1626
						ATL3	1626								ATM	9171
						ATM	9171								ATMIN	2472
						ATMIN	2472								ATN1	3573
						ATN1	3573								ATOX1	207
						ATOX1	207								ATP10D	4281
						ATP10D	4281								ATP11A	3405
						ATP11A	3405								ATP11B	3534
						ATP11B	3534								ATP11C	3390
						ATP11C	3390								ATP13A1	3615
						ATP13A1	3615								ATP13A2	3543
						ATP13A2	3543								ATP13A3	3771
						ATP13A3	3771								ATP1A1	3072
						ATP1A1	3072								ATP1B1	912
						ATP1B1	912								ATP1B2	873
						ATP1B2	873								ATP1B3	840
						ATP1B3	840								ATP2A2	3129
						ATP23	741								ATP2A3	3000
						ATP2A2	3129								ATP2B1	3663
						ATP2A3	3000								ATP2B4	3618
						ATP2B1	3663								ATP2C1	2760
						ATP2B4	3618								ATP5F1A	1662
						ATP2C1	2760								ATP5F1B	1590
						ATP5F1A	1662								ATP5F1C	897
						ATP5F1B	1590								ATP5F1D	507
						ATP5F1C	897								ATP5F1E	156
						ATP5F1D	507								ATP5IF1	321
						ATP5F1E	156								ATP5MC1	411
						ATP5IF1	321								ATP5MC2	426
						ATP5MC1	411								ATP5MC3	429
						ATP5MC2	426								ATP5ME	210
						ATP5MC3	429								ATP5MF	285
						ATP5ME	210								ATP5MG	312
						ATP5MF	285								ATP5MJ	177
						ATP5MG	312								ATP5MK	177
						ATP5MJ	177								ATP5PB	771
						ATP5MK	177								ATP5PD	486
						ATP5PB	771								ATP5PF	327
						ATP5PD	486								ATP5PO	642
						ATP5PF	327								ATP6AP1	1413
						ATP5PO	642								ATP6AP2	1053
						ATP6AP1	1413								ATP6V0A1	2514
						ATP6AP2	1053								ATP6V0A2	2571
						ATP6V0A1	2514								ATP6V0B	618
						ATP6V0A2	2571								ATP6V0D1	1056
						ATP6V0B	618								ATP6V0E1	246
						ATP6V0D1	1056								ATP6V0E2	246
						ATP6V0E1	246								ATP6V1A	1854
						ATP6V0E2	246								ATP6V1B2	1536
						ATP6V1A	1854								ATP6V1C1	1149
						ATP6V1B2	1536								ATP6V1D	744
						ATP6V1C1	1149								ATP6V1E1	681
						ATP6V1D	744								ATP6V1F	360
						ATP6V1E1	681								ATP6V1G1	357
						ATP6V1F	360								ATP6V1H	1452
						ATP6V1G1	357								ATP7A	4503
						ATP6V1H	1452								ATP7B	4398
						ATP7A	4503								ATP8A1	3495
						ATP7B	4398								ATP8B2	3573
						ATP8A1	3495								ATP9A	3144
						ATP8B2	3573								ATP9B	295
						ATP9A	3144								ATPAF1	987
						ATP9B	295								ATPAF2	870
						ATPAF1	987								ATPSCKMT	702
						ATPAF2	870								ATR	7935
						ATPSCKMT	702								ATRAID	690
						ATR	7935								ATRIP	2376
						ATRAID	690								ATRN	4290
						ATRIP	2376								ATRNL1	4140
						ATRN	4290								ATRX	7479
						ATRX	7479								ATXN1	2448
						ATXN1	2448								ATXN10	1428
						ATXN10	1428								ATXN1L	2070
						ATXN1L	2070								ATXN2	3468
						ATXN2	3468								ATXN2L	3228
						ATXN2L	3228								ATXN3	1086
						ATXN3	1086								ATXN7	2679
						ATXN7	2679								ATXN7L2	2265
						ATXN7L2	2265								ATXN7L3	1044
						ATXN7L3	1044								ATXN7L3B	294
						ATXN7L3B	294								AUH	1020
						AUNIP	1074								AUNIP	1074
						AUP1	1233								AUP1	1233
						AURKA	1212								AURKA	1212
						AURKAIP1	600								AURKAIP1	600
						AURKB	1035								AURKB	1035
						AUTS2	3780								AUTS2	3780
						AVL9	1947								AVEN	1089
						AVPI1	444								AVL9	1947
						AXIN1	2589								AVPI1	444
						AZI2	1179								AXIN1	2589
						AZIN1	1347								AZI2	1179
						B2M	360								AZIN1	1347
						B3GALNT2	1503								AZIN2	1383
						B3GALT6	990								B2M	360
						B3GAT3	1008								B3GALNT2	1503
						B3GLCT	1497								B3GALT6	990
						B3GNT2	1194								B3GAT3	1008
						B3GNT5	1137								B3GLCT	1497
						B4GALNT1	1602								B3GNT2	1194
						B4GALNT3	2997								B3GNT5	1137
						B4GALNT4	3120								B4GALNT1	1602
						B4GALT1	1197								B4GALNT3	2997
						B4GALT2	1119								B4GALNT4	3120
						B4GALT3	1182								B4GALT1	1197
						B4GALT4	1035								B4GALT2	1119
						B4GALT5	1167								B4GALT3	1182
						B4GALT6	1149								B4GALT4	1035
						B4GALT7	984								B4GALT5	1167
						B4GAT1	1248								B4GALT6	1149
						B9D1	615								B4GALT7	984
						BABAM1	990								B4GAT1	1248
						BABAM2	1152								B9D1	615
						BACE1	1506								BABAM1	990
						BACE2	1557								BABAM2	1152
						BACH1	2211								BACE1	1506
						BAD	507								BACE2	1557
						BAG1	1038								BACH1	2211
						BAG2	636								BAD	507
						BAG3	1728								BAG1	1038
						BAG4	1374								BAG2	636
						BAG5	1344								BAG3	1728
						BAG6	3399								BAG4	1374
						BAHCC1	7827								BAG5	1344
						BAHD1	2343								BAG6	3399
						BAIAP2	1605								BAHCC1	7827
						BAIAP2L1	1536								BAHD1	2343
						BAK1	636								BAIAP2	1605
						BAMBI	783								BAIAP2L1	1536
						BANF1	270								BAK1	636
						BANP	1593								BAMBI	783
						BAP1	2190								BANF1	270
						BARD1	2334								BANP	1593
						BARX1	765								BAP1	2190
						BATF3	384								BARD1	2334
						BAX	579								BARX1	765
						BAZ1A	4671								BASP1	684
						BAZ1B	4452								BATF3	384
						BAZ2A	5712								BAX	579
						BAZ2B	6507								BAZ1A	4671
						BBC3	582								BAZ1B	4452
						BBIP1	279								BAZ2A	5712
						BBS10	2172								BAZ2B	6507
						BBS12	2133								BBC3	582
						BBS2	2166								BBIP1	279
						BBS4	1560								BBS10	2172
						BBS7	2148								BBS2	2166
						BBS9	2664								BBS4	1560
						BBX	2826								BBS7	2148
						BCAM	1887								BBS9	2664
						BCAP31	741								BBX	2826
						BCAR1	2751								BCAM	1887
						BCAS2	678								BCAP31	741
						BCAS3	2742								BCAR1	2751
						BCAS4	522								BCAS2	678
						BCAT1	1161								BCAS3	2742
						BCAT2	1179								BCAS4	522
						BCCIP	945								BCAT1	1161
						BCDIN3D	879								BCAT2	1179
						BCHE	1809								BCCIP	945
						BCKDK	1239								BCDIN3D	879
						BCL10	702								BCHE	1809
						BCL11A	2508								BCKDHB	1179
						BCL2L1	702								BCKDK	1239
						BCL2L11	597								BCL10	702
						BCL2L12	753								BCL11A	2508
						BCL2L13	1458								BCL2L1	702
						BCL2L2	582								BCL2L11	597
						BCL6B	1440								BCL2L12	753
						BCL7A	696								BCL2L13	1458
						BCL7B	609								BCL2L2	582
						BCL7C	654								BCL6B	1440
						BCL9	4281								BCL7A	696
						BCLAF1	2763								BCL7B	609
						BCOR	5268								BCL7C	654
						BCORL1	5358								BCL9	4281
						BCR	3816								BCLAF1	2763
						BCS1L	1260								BCOR	5268
						BDH2	738								BCORL1	5358
						BDP1	7875								BCR	3816
						BECN1	1353								BCS1L	1260
						BEND3	2487								BDH2	738
						BEND4	1605								BDP1	7875
						BEND7	1242								BECN1	1353
						BET1	357								BEND3	2487
						BET1L	336								BEND4	1605
						BEX2	387								BEND7	1242
						BEX3	306								BET1	357
						BEX4	363								BET1L	336
						BEX5	336								BEX2	387
						BFAR	1353								BEX3	306
						BHLHA15	570								BEX4	363
						BHLHE40	1239								BEX5	336
						BICC1	2925								BFAR	1353
						BICD1	2928								BHLHA15	570
						BICD2	2568								BHLHE40	1239
						BICRA	4683								BICC1	2925
						BID	588								BICD1	2928
						BIN1	1782								BICD2	2568
						BIN3	762								BICRA	4683
						BIRC2	1857								BICRAL	3240
						BIRC5	429								BID	588
						BIRC6	14574								BIN1	1782
						BIVM	1512								BIN3	762
						BLCAP	264								BIRC2	1857
						BLM	4254								BIRC5	429
						BLMH	1368								BIRC6	14574
						BLOC1S1	462								BIVM	1512
						BLOC1S2	429								BLCAP	264
						BLOC1S3	609								BLM	4254
						BLOC1S4	654								BLMH	1368
						BLOC1S5	564								BLOC1S1	462
						BLOC1S6	519								BLOC1S2	429
						BLVRA	891								BLOC1S3	609
						BLVRB	621								BLOC1S4	654
						BLZF1	1203								BLOC1S5	564
						BMI1	981								BLOC1S6	519
						BMP1	2961								BLVRA	891
						BMP2K	3486								BLVRB	621
						BMP4	1227								BLZF1	1203
						BMP7	1296								BMI1	981
						BMP8B	1209								BMP1	2961
						BMPR1A	1599								BMP2K	3486
						BMPR2	3117								BMP4	1227
						BMS1	3849								BMP6	1542
						BMT2	1218								BMP7	1296
						BNIP1	687								BMP8B	1209
						BNIP2	945								BMPR1A	1599
						BNIP3	585								BMPR2	3117
						BNIP3L	660								BMS1	3849
						BOC	3348								BMT2	1218
						BOD1	558								BNIP1	687
						BOD1L1	9156								BNIP2	945
						BOLA1	414								BNIP3	585
						BOLA2B	261								BNIP3L	660
						BOLA3	324								BOC	3348
						BOP1	2241								BOD1	558
						BORA	1680								BOD1L1	9156
						BORCS5	591								BOLA1	414
						BORCS6	1074								BOLA2B	261
						BORCS7	321								BOLA3	324
						BORCS8	360								BOP1	2241
						BPGM	780								BORA	1680
						BPHL	876								BORCS6	1074
						BPNT1	927								BORCS7	321
						BPNT2	1080								BORCS8	360
						BPTF	8763								BPGM	780
						BRAF	2301								BPHL	876
						BRAP	1779								BPNT1	927
						BRAT1	2466								BPNT2	1080
						BRCA1	5592								BPTF	8763
						BRCA2	10257								BRAF	2301
						BRCC3	876								BRAP	1779
						BRD1	3570								BRAT1	2466
						BRD2	1092								BRCA1	5592
						BRD3	2181								BRCA2	10257
						BRD3OS	255								BRCC3	876
						BRD4	4089								BRD1	3570
						BRD7	1956								BRD2	1092
						BRD8	3708								BRD3	2181
						BRD9	1794								BRD3OS	255
						BRF1	2034								BRD4	4089
						BRF2	1260								BRD7	1956
						BRI3	378								BRD8	3708
						BRI3BP	756								BRD9	1794
						BRINP3	2301								BRF1	2034
						BRIP1	3750								BRF2	1260
						BRIX1	1062								BRI3	378
						BRK1	228								BRI3BP	756
						BRMS1	741								BRINP3	2301
						BRMS1L	972								BRIP1	3750
						BROX	1236								BRIX1	1062
						BRPF1	3663								BRK1	228
						BRPF3	3618								BRMS1	741
						BRSK1	2337								BRMS1L	972
						BRSK2	2211								BROX	1236
						BRWD1	6810								BRPF1	3663
						BRWD3	5409								BRPF3	3618
						BSDC1	1293								BRSK1	2337
						BSG	1158								BRSK2	2211
						BST2	543								BRWD1	6810
						BTAF1	5550								BRWD3	5409
						BTBD1	1449								BSDC1	1293
						BTBD10	1428								BSG	1158
						BTBD2	1578								BSN	11781
						BTBD3	1569								BST2	543
						BTBD6	1617								BTAF1	5550
						BTBD7	3399								BTBD1	1449
						BTBD8	5379								BTBD10	1428
						BTD	1572								BTBD2	1578
						BTF3	621								BTBD3	1569
						BTF3L4	477								BTBD6	1617
						BTG1	516								BTBD7	3399
						BTG2	477								BTD	1572
						BTG3	759								BTF3	621
						BTN2A1	1584								BTF3L4	477
						BTN2A2	1572								BTG1	516
						BTN3A1	1542								BTG2	477
						BTN3A2	1005								BTG3	759
						BTN3A3	1755								BTN2A1	1584
						BTNL9	1608								BTN2A2	1572
						BTRC	1818								BTN3A1	1542
						BUB1	3258								BTN3A2	1005
						BUB1B	3153								BTN3A3	1755
						BUB3	987								BTNL9	1608
						BUD13	1860								BTRC	1818
						BUD23	846								BUB1	3258
						BUD31	435								BUB1B	3153
						BVES	1083								BUB3	987
						BYSL	1314								BUD13	1860
						BZW1	1260								BUD23	846
						BZW2	1260								BUD31	435
						C10orf88	1338								BVES	1083
						C11orf1	453								BYSL	1314
						C11orf24	1350								BZW1	1260
						C11orf58	552								BZW2	1260
						C11orf68	882								C10orf88	1338
						C11orf80	1536								C11orf1	453
						C12orf29	978								C11orf24	1350
						C12orf4	1659								C11orf54	948
						C12orf43	789								C11orf58	552
						C12orf57	381								C11orf68	882
						C12orf60	738								C11orf71	372
						C12orf73	216								C11orf80	1536
						C12orf75	192								C12orf29	978
						C12orf76	219								C12orf4	1659
						C14orf119	423								C12orf43	789
						C14orf132	252								C12orf57	381
						C15orf39	3144								C12orf73	216
						C15orf40	462								C12orf75	192
						C15orf61	474								C12orf76	219
						C16orf72	828								C14orf119	423
						C16orf87	465								C14orf132	252
						C16orf91	399								C14orf93	1617
						C17orf58	1020								C15orf39	3144
						C17orf75	1191								C15orf40	462
						C17orf80	1830								C15orf61	474
						C18orf21	663								C16orf72	828
						C18orf25	1215								C16orf87	465
						C18orf54	1602								C16orf91	399
						C19orf12	426								C17orf58	1020
						C19orf25	357								C17orf75	1191
						C19orf44	1974								C17orf80	1830
						C19orf47	1158								C18orf21	663
						C19orf53	300								C18orf25	1215
						C19orf54	1056								C18orf54	1602
						C19orf81	597								C19orf12	426
						C1D	426								C19orf25	357
						C1GALT1	1092								C19orf44	1974
						C1GALT1C1	957								C19orf47	1158
						C1orf109	612								C19orf53	300
						C1orf112	2562								C19orf54	1056
						C1orf115	429								C19orf81	597
						C1orf122	333								C1D	426
						C1orf131	882								C1GALT1	1092
						C1orf159	597								C1GALT1C1	957
						C1orf174	732								C1orf109	612
						C1orf198	984								C1orf112	2562
						C1orf21	366								C1orf115	429
						C1orf216	690								C1orf122	333
						C1orf35	792								C1orf131	882
						C1orf43	762								C1orf159	597
						C1orf52	549								C1orf174	732
						C1orf54	396								C1orf198	984
						C1orf74	810								C1orf21	366
						C1QBP	849								C1orf216	690
						C1QL1	777								C1orf35	792
						C1QL4	717								C1orf43	762
						C1QTNF6	837								C1orf52	549
						C1R	2160								C1orf54	396
						C20orf27	525								C1orf74	810
						C20orf96	1092								C1QBP	849
						C21orf58	969								C1QL1	777
						C21orf91	894								C1QL4	717
						C22orf39	318								C1QTNF6	837
						C2CD2L	2121								C20orf27	525
						C2CD3	7062								C20orf96	1092
						C2CD5	3156								C21orf58	969
						C2orf42	1725								C21orf91	894
						C2orf49	699								C22orf39	318
						C2orf68	501								C2CD2L	2121
						C2orf69	1158								C2CD3	7062
						C2orf72	888								C2CD5	3156
						C2orf76	381								C2orf42	1725
						C3	4992								C2orf49	699
						C3orf14	387								C2orf68	501
						C3orf18	489								C2orf69	1158
						C3orf38	990								C2orf76	381
						C3orf52	753								C3	4992
						C4orf3	201								C3orf14	387
						C4orf33	600								C3orf38	990
						C4orf46	342								C3orf52	753
						C4orf48	288								C3orf62	804
						C5orf15	798								C4orf3	201
						C5orf22	1329								C4orf33	600
						C5orf24	567								C4orf46	342
						C5orf34	1917								C4orf48	288
						C6orf120	576								C5orf15	798
						C6orf47	885								C5orf22	1329
						C6orf62	690								C5orf24	567
						C6orf89	1044								C5orf34	1917
						C7orf31	1773								C6orf120	576
						C7orf50	585								C6orf136	1302
						C8orf33	690								C6orf47	885
						C8orf82	651								C6orf62	690
						C8orf88	354								C6orf89	1044
						C9orf40	585								C7orf31	1773
						C9orf64	1026								C7orf50	585
						C9orf72	1446								C8orf33	690
						C9orf78	870								C8orf82	651
						C9orf85	474								C8orf88	354
						CA11	987								C9orf40	585
						CA12	1065								C9orf64	1026
						CA2	783								C9orf72	1446
						CA8	873								C9orf78	870
						CAAP1	1086								C9orf85	474
						CAB39	1026								CA11	987
						CABIN1	6663								CA12	1065
						CABLES1	1902								CA2	783
						CABLES2	1437								CA8	873
						CABYR	1140								CAAP1	1086
						CACFD1	702								CAB39	1026
						CACHD1	3825								CABIN1	6663
						CACNA1H	7062								CABLES1	1902
						CACNA2D1	3276								CABLES2	1437
						CACNA2D2	3432								CABYR	1140
						CACNB1	1797								CACFD1	702
						CACNB3	1455								CACHD1	3825
						CACNB4	1563								CACNA1H	7062
						CACNG8	1278								CACNA2D1	3276
						CACTIN	2277								CACNA2D2	3432
						CACUL1	1110								CACNB3	1455
						CACYBP	687								CACNB4	1563
						CAD	6678								CACNG8	1278
						CADM1	1416								CACTIN	2277
						CADM4	1167								CACUL1	1110
						CADPS2	3891								CACYBP	687
						CALCB	384								CAD	6678
						CALCOCO1	2076								CADM1	1416
						CALCOCO2	1341								CADM4	1167
						CALD1	2382								CADPS2	3891
						CALM1	450								CALCB	384
						CALM2	450								CALCOCO1	2076
						CALM3	450								CALCOCO2	1341
						CALR	1254								CALD1	2382
						CALU	948								CALM1	450
						CAMK1	1113								CALM2	450
						CAMK1D	1158								CALM3	450
						CAMK2D	1602								CALR	1254
						CAMK2G	1767								CALU	948
						CAMK2N1	237								CAMK1	1113
						CAMK4	1422								CAMK1D	1158
						CAMKK1	1518								CAMK2D	1602
						CAMKK2	1767								CAMK2G	1767
						CAMKV	1506								CAMK2N1	237
						CAMLG	891								CAMK4	1422
						CAMSAP1	4809								CAMKK1	1518
						CAMSAP2	4437								CAMKK2	1767
						CAMSAP3	3750								CAMKMT	972
						CAMTA1	5022								CAMKV	1506
						CAMTA2	3609								CAMLG	891
						CAND1	3693								CAMSAP1	4809
						CAND2	3711								CAMSAP2	4437
						CANT1	1206								CAMSAP3	3750
						CANX	1779								CAMTA1	5022
						CAP1	1428								CAMTA2	3609
						CAP2	1434								CAND1	3693
						CAPG	1047								CAND2	3711
						CAPN1	2145								CANT1	1206
						CAPN10	2019								CANX	1779
						CAPN15	3261								CAP1	1428
						CAPN2	2103								CAP2	1434
						CAPN7	2442								CAPG	1047
						CAPNS1	807								CAPN1	2145
						CAPRIN1	2130								CAPN10	2019
						CAPRIN2	3138								CAPN15	3261
						CAPZA1	861								CAPN2	2103
						CAPZA2	861								CAPN7	2442
						CAPZB	819								CAPNS1	807
						CARD10	3099								CAPRIN1	2130
						CARD19	552								CAPRIN2	3138
						CARD8	1614								CAPZA1	861
						CARHSP1	444								CAPZA2	861
						CARM1	1827								CAPZB	819
						CARMIL1	4116								CARD10	3099
						CARMIL2	4308								CARD19	552
						CARNMT1	1230								CARD8	1614
						CARS1	2496								CARHSP1	444
						CARS2	1695								CARM1	1827
						CASC3	2112								CARMIL1	4116
						CASD1	2394								CARMIL2	4308
						CASK	2781								CARNMT1	1230
						CASKIN1	4296								CARS1	2496
						CASKIN2	3609								CARS2	1695
						CASP10	1569								CASC3	2112
						CASP2	1359								CASD1	2394
						CASP3	834								CASK	2781
						CASP6	882								CASKIN2	3609
						CASP7	912								CASP10	1569
						CASP8	1440								CASP2	1359
						CASP8AP2	5916								CASP3	834
						CASP9	1251								CASP6	882
						CAST	2376								CASP7	912
						CASTOR2	990								CASP8	1440
						CAT	1584								CASP8AP2	5916
						CAV1	537								CASP9	1251
						CAV2	489								CAST	2376
						CAVIN1	1173								CASTOR2	990
						CBFA2T2	1788								CAT	1584
						CBFB	564								CAV1	537
						CBL	2721								CAV2	489
						CBLB	2949								CAVIN1	1173
						CBLL1	1476								CBFA2T2	1788
						CBR1	834								CBFB	564
						CBR4	714								CBL	2721
						CBS	1656								CBLB	2949
						CBWD1	1188								CBLL1	1476
						CBWD2	1188								CBR1	834
						CBWD3	1188								CBR4	714
						CBWD5	1188								CBS	1656
						CBWD6	1188								CBWD1	1188
						CBX1	558								CBWD2	1188
						CBX2	1599								CBWD3	1188
						CBX3	552								CBWD5	1188
						CBX4	1683								CBWD6	1188
						CBX5	576								CBX1	558
						CBX6	1239								CBX2	1599
						CBX7	756								CBX3	552
						CBX8	1170								CBX4	1683
						CBY1	381								CBX5	576
						CC2D1A	2856								CBX6	1239
						CC2D1B	2559								CBX7	756
						CCAR1	3453								CBX8	1170
						CCAR2	2772								CBY1	381
						CCDC102A	1653								CC2D1A	2856
						CCDC106	843								CC2D1B	2559
						CCDC107	852								CCAR1	3453
						CCDC112	1590								CCAR2	2772
						CCDC113	1134								CCDC102A	1653
						CCDC115	543								CCDC106	843
						CCDC117	840								CCDC107	852
						CCDC12	501								CCDC112	1590
						CCDC120	2091								CCDC113	1134
						CCDC122	822								CCDC115	543
						CCDC124	672								CCDC117	840
						CCDC125	1536								CCDC12	501
						CCDC126	423								CCDC120	2091
						CCDC127	783								CCDC121	837
						CCDC134	690								CCDC124	672
						CCDC136	3465								CCDC125	1536
						CCDC137	870								CCDC126	423
						CCDC138	1998								CCDC127	783
						CCDC14	2718								CCDC134	690
						CCDC142	2253								CCDC136	3465
						CCDC15	2856								CCDC137	870
						CCDC150	3306								CCDC138	1998
						CCDC163	438								CCDC14	2718
						CCDC167	294								CCDC142	2253
						CCDC174	1404								CCDC15	2856
						CCDC18	4368								CCDC150	3306
						CCDC181	1530								CCDC167	294
						CCDC186	2697								CCDC174	1404
						CCDC191	2811								CCDC18	4368
						CCDC22	1884								CCDC181	1530
						CCDC25	627								CCDC186	2697
						CCDC28A	555								CCDC191	2811
						CCDC28B	603								CCDC22	1884
						CCDC3	813								CCDC25	627
						CCDC32	558								CCDC28A	555
						CCDC34	1122								CCDC28B	603
						CCDC40	3429								CCDC3	813
						CCDC43	675								CCDC32	558
						CCDC47	1452								CCDC34	1122
						CCDC50	1449								CCDC40	3429
						CCDC51	1236								CCDC43	675
						CCDC57	3084								CCDC47	1452
						CCDC59	726								CCDC50	1449
						CCDC6	1425								CCDC51	1236
						CCDC66	2847								CCDC57	3084
						CCDC69	891								CCDC59	726
						CCDC71	1404								CCDC6	1425
						CCDC71L	708								CCDC66	2847
						CCDC74A	939								CCDC69	891
						CCDC74B	945								CCDC71	1404
						CCDC77	1467								CCDC71L	708
						CCDC8	1617								CCDC74A	939
						CCDC80	2853								CCDC74B	945
						CCDC82	1635								CCDC77	1467
						CCDC85B	609								CCDC8	1617
						CCDC85C	1260								CCDC80	2853
						CCDC86	1083								CCDC82	1635
						CCDC88A	5616								CCDC85B	609
						CCDC88C	6087								CCDC85C	1260
						CCDC9	1596								CCDC86	1083
						CCDC90B	765								CCDC88A	5616
						CCDC91	1326								CCDC88C	6087
						CCDC92	996								CCDC9	1596
						CCDC93	1896								CCDC90B	765
						CCDC97	1032								CCDC91	1326
						CCHCR1	2613								CCDC92	996
						CCM2	1335								CCDC93	1896
						CCN1	1146								CCDC97	1032
						CCNA2	1299								CCHCR1	2613
						CCNB1	1302								CCM2	1335
						CCNB1IP1	834								CCN1	1146
						CCNB2	1197								CCNA2	1299
						CCNC	852								CCNB1	1302
						CCND1	888								CCNB1IP1	834
						CCND2	870								CCNB2	1197
						CCND3	879								CCNC	852
						CCNDBP1	1083								CCND1	888
						CCNE1	1233								CCND2	870
						CCNE2	1215								CCND3	879
						CCNF	2361								CCNDBP1	1083
						CCNG1	888								CCNE1	1233
						CCNG2	1035								CCNE2	1215
						CCNH	972								CCNF	2361
						CCNI	1134								CCNG1	888
						CCNJ	1152								CCNG2	1035
						CCNK	1743								CCNH	972
						CCNL1	1581								CCNI	1134
						CCNL2	1563								CCNJ	1152
						CCNQ	747								CCNK	1743
						CCNT1	2181								CCNL1	1581
						CCNT2	2193								CCNL2	1563
						CCNY	1026								CCNQ	747
						CCNYL1	1080								CCNT1	2181
						CCP110	2976								CCNT2	2193
						CCPG1	2424								CCNY	1026
						CCS	825								CCNYL1	1080
						CCSAP	813								CCP110	2976
						CCSER2	3144								CCS	825
						CCT2	1608								CCSAP	813
						CCT3	1638								CCSER2	3144
						CCT4	1620								CCT2	1608
						CCT5	1626								CCT3	1638
						CCT6A	1596								CCT4	1620
						CCT7	1632								CCT5	1626
						CCT8	1647								CCT6A	1596
						CCZ1	1449								CCT7	1632
						CCZ1B	1449								CCT8	1647
						CD109	4338								CCZ1	1449
						CD151	762								CCZ1B	1449
						CD164	594								CD109	4338
						CD276	1605								CD151	762
						CD2AP	1920								CD164	594
						CD2BP2	1026								CD24	243
						CD302	699								CD276	1605
						CD320	849								CD2AP	1920
						CD40	834								CD2BP2	1026
						CD46	1134								CD302	699
						CD47	972								CD320	849
						CD55	1146								CD40	834
						CD59	387								CD46	1134
						CD63	717								CD47	972
						CD81	711								CD55	1146
						CD83	618								CD59	387
						CD9	687								CD63	717
						CD99	558								CD81	711
						CD99L2	789								CD83	618
						CDADC1	1545								CD9	687
						CDAN1	3684								CD99	558
						CDC123	1011								CD99L2	789
						CDC14A	1785								CDADC1	1545
						CDC14B	1497								CDAN1	3684
						CDC16	1863								CDC123	1011
						CDC20	1500								CDC14B	1497
						CDC23	1794								CDC16	1863
						CDC25A	1575								CDC20	1500
						CDC25B	1743								CDC23	1794
						CDC25C	1422								CDC25A	1575
						CDC26	258								CDC25B	1743
						CDC27	2475								CDC25C	1422
						CDC34	711								CDC26	258
						CDC37	1137								CDC27	2475
						CDC37L1	1014								CDC34	711
						CDC40	1740								CDC37	1137
						CDC42	576								CDC37L1	1014
						CDC42BPA	5265								CDC40	1740
						CDC42BPB	5136								CDC42	576
						CDC42EP1	1176								CDC42BPA	5265
						CDC42EP3	765								CDC42BPB	5136
						CDC42EP4	1071								CDC42EP1	1176
						CDC42SE1	240								CDC42EP3	765
						CDC42SE2	255								CDC42EP4	1071
						CDC45	1701								CDC42SE1	240
						CDC5L	2409								CDC42SE2	255
						CDC6	1683								CDC45	1701
						CDC7	1725								CDC5L	2409
						CDC73	1596								CDC6	1683
						CDCA2	3072								CDC7	1725
						CDCA3	807								CDC73	1596
						CDCA4	726								CDCA2	3072
						CDCA5	759								CDCA3	807
						CDCA7	1353								CDCA4	726
						CDCA7L	1365								CDCA5	759
						CDCA8	843								CDCA7	1353
						CDH2	2721								CDCA7L	1365
						CDH24	2346								CDCA8	843
						CDHR1	2580								CDH2	2721
						CDIP1	627								CDH23	10065
						CDIPT	642								CDH24	2346
						CDK1	894								CDHR1	2580
						CDK10	1083								CDIN1	846
						CDK11B	2349								CDIP1	627
						CDK12	4473								CDIPT	642
						CDK13	4539								CDK1	894
						CDK14	1410								CDK10	1083
						CDK16	1491								CDK11B	2349
						CDK17	1572								CDK12	4473
						CDK18	1425								CDK13	4539
						CDK19	1509								CDK14	1410
						CDK2	897								CDK16	1491
						CDK20	1041								CDK17	1572
						CDK2AP1	348								CDK18	1425
						CDK2AP2	381								CDK19	1509
						CDK4	912								CDK2	897
						CDK5	879								CDK20	1041
						CDK5R1	924								CDK2AP1	348
						CDK5RAP1	1764								CDK2AP2	381
						CDK5RAP2	5682								CDK4	912
						CDK5RAP3	1521								CDK5	879
						CDK6	981								CDK5R1	924
						CDK7	1041								CDK5RAP1	1764
						CDK8	1395								CDK5RAP2	5682
						CDK9	1119								CDK5RAP3	1521
						CDKAL1	1740								CDK6	981
						CDKL2	1713								CDK7	1041
						CDKL5	2883								CDK8	1395
						CDKN1A	495								CDK9	1119
						CDKN1B	597								CDKAL1	1740
						CDKN2A	471								CDKL1	1074
						CDKN2AIP	1743								CDKL2	1713
						CDKN2AIPNL	351								CDKL5	2883
						CDKN2B	417								CDKN1A	495
						CDKN2C	507								CDKN1B	597
						CDKN3	639								CDKN2A	471
						CDON	3795								CDKN2AIP	1743
						CDPF1	372								CDKN2AIPNL	351
						CDR2	1365								CDKN2B	417
						CDR2L	1398								CDKN2C	507
						CDS1	1386								CDKN2D	501
						CDS2	1338								CDKN3	639
						CDT1	1641								CDON	3795
						CDV3	777								CDPF1	372
						CDX2	942								CDR2	1365
						CDYL	1635								CDR2L	1398
						CEACAM19	900								CDS1	1386
						CEBPA	1077								CDS2	1338
						CEBPB	1038								CDT1	1641
						CEBPG	453								CDV3	777
						CEBPZ	3165								CDX2	942
						CEBPZOS	243								CDYL	1635
						CECR2	4395								CEBPA	1077
						CELF1	1545								CEBPB	1038
						CELSR1	9060								CEBPG	453
						CELSR2	8772								CEBPZ	3165
						CELSR3	9939								CEBPZOS	243
						CEMIP2	4152								CECR2	4395
						CENATAC	999								CELF1	1545
						CENPA	423								CELSR1	9060
						CENPB	1800								CELSR2	8772
						CENPC	2832								CELSR3	9939
						CENPE	8106								CEMIP2	4152
						CENPF	9345								CENATAC	999
						CENPH	744								CENPA	423
						CENPI	2271								CENPB	1800
						CENPJ	4017								CENPC	2832
						CENPK	810								CENPE	8106
						CENPL	1035								CENPF	9345
						CENPM	543								CENPH	744
						CENPN	1020								CENPI	2271
						CENPO	903								CENPJ	4017
						CENPP	867								CENPK	810
						CENPQ	807								CENPL	1035
						CENPT	1686								CENPM	543
						CENPU	1257								CENPN	1020
						CENPV	819								CENPO	903
						CENPW	267								CENPP	867
						CENPX	246								CENPQ	807
						CEP104	2778								CENPT	1686
						CEP112	2868								CENPU	1257
						CEP120	2961								CENPV	819
						CEP128	3285								CENPW	267
						CEP131	3243								CENPX	246
						CEP135	3423								CEP104	2778
						CEP152	5133								CEP112	2868
						CEP162	4212								CEP120	2961
						CEP164	4383								CEP128	3285
						CEP170	4755								CEP131	3243
						CEP170B	4665								CEP135	3423
						CEP192	7614								CEP152	5133
						CEP20	597								CEP162	4212
						CEP250	7329								CEP164	4383
						CEP290	7440								CEP170	4755
						CEP295	7806								CEP170B	4665
						CEP350	9354								CEP192	7614
						CEP41	1122								CEP20	597
						CEP43	1200								CEP250	7329
						CEP44	1173								CEP290	7440
						CEP55	1395								CEP295	7806
						CEP57	1503								CEP350	9354
						CEP57L1	1383								CEP41	1122
						CEP68	2274								CEP43	1200
						CEP70	1794								CEP44	1173
						CEP72	512								CEP55	1395
						CEP76	1980								CEP57	1503
						CEP78	2118								CEP57L1	1383
						CEP83	2106								CEP63	2112
						CEP85	2286								CEP68	2274
						CEP85L	2418								CEP70	1794
						CEP89	2352								CEP72	512
						CEP95	2466								CEP76	1980
						CEP97	2598								CEP78	2118
						CEPT1	1251								CEP83	2106
						CERCAM	1788								CEP85	2286
						CERK	1614								CEP85L	2418
						CERS2	1143								CEP89	2352
						CERS4	1185								CEP95	2466
						CERS5	1179								CEP97	2598
						CERS6	1155								CEPT1	1251
						CERT1	1875								CERCAM	1788
						CES2	1680								CERK	1614
						CES3	1716								CERS1	1053
						CETN2	519								CERS2	1143
						CETN3	504								CERS4	1185
						CFAP20	582								CERS5	1179
						CFAP298	873								CERS6	1155
						CFAP36	1029								CERT1	1875
						CFAP44	5565								CES2	1680
						CFAP97	1599								CES3	1716
						CFDP1	900								CETN2	519
						CFL1	501								CETN3	504
						CFL2	501								CFAP20	582
						CFLAR	1443								CFAP20DC	2445
						CGGBP1	504								CFAP298	873
						CGN	3612								CFAP36	1029
						CGRRF1	999								CFAP410	771
						CHAC1	669								CFAP44	5565
						CHAC2	555								CFAP97	1599
						CHAF1A	2871								CFD	783
						CHAF1B	1680								CFDP1	900
						CHAMP1	2439								CFL1	501
						CHCHD1	357								CFL2	501
						CHCHD10	450								CFLAR	1443
						CHCHD2	456								CGGBP1	504
						CHCHD3	684								CGN	3612
						CHCHD4	429								CGRRF1	999
						CHCHD5	333								CHAC1	669
						CHCHD6	708								CHAC2	555
						CHCHD7	258								CHAF1A	2871
						CHD1	5133								CHAF1B	1680
						CHD2	5487								CHAMP1	2439
						CHD3	6003								CHCHD1	357
						CHD4	5739								CHCHD10	450
						CHD6	8148								CHCHD2	456
						CHD7	8994								CHCHD3	684
						CHD8	7746								CHCHD4	429
						CHD9	8694								CHCHD5	333
						CHDH	1785								CHCHD6	708
						CHEK1	1431								CHCHD7	258
						CHEK2	1632								CHD1	5133
						CHERP	2751								CHD2	5487
						CHFR	1959								CHD3	6003
						CHIC1	675								CHD4	5739
						CHID1	1182								CHD6	8148
						CHKA	1374								CHD7	8994
						CHM	1962								CHD8	7746
						CHML	1971								CHD9	8694
						CHMP1A	591								CHDH	1785
						CHMP1B	600								CHEK1	1431
						CHMP2A	669								CHEK2	1632
						CHMP2B	642								CHERP	2751
						CHMP3	669								CHFR	1959
						CHMP4B	675								CHIC1	675
						CHMP5	660								CHIC2	498
						CHMP6	606								CHID1	1182
						CHMP7	1362								CHKA	1374
						CHN1	1380								CHM	1962
						CHORDC1	999								CHML	1971
						CHP1	588								CHMP1A	591
						CHPF	2328								CHMP1B	600
						CHPF2	2319								CHMP2A	669
						CHPT1	1221								CHMP2B	642
						CHRAC1	396								CHMP3	669
						CHRD	2868								CHMP4B	675
						CHRFAM7A	1239								CHMP5	660
						CHRNA5	1407								CHMP6	606
						CHRNA7	1509								CHMP7	1362
						CHRNB1	1506								CHN1	1380
						CHST10	1071								CHORDC1	999
						CHST11	1059								CHP1	588
						CHST12	1245								CHPF	2328
						CHST14	1131								CHPF2	2319
						CHST15	1686								CHPT1	1221
						CHST2	1593								CHRAC1	396
						CHST3	1440								CHRD	2868
						CHSY1	2409								CHRFAM7A	1239
						CHTF18	2928								CHRNA3	1518
						CHTOP	747								CHRNA5	1407
						CHUK	2238								CHRNA7	1509
						CHURC1	339								CHRNB1	1506
						CIAO1	1020								CHST10	1071
						CIAO2A	483								CHST11	1059
						CIAO2B	492								CHST12	1245
						CIAO3	1431								CHST14	1131
						CIAPIN1	939								CHST15	1686
						CIB1	576								CHST2	1593
						CIB2	564								CHST3	1440
						CIBAR1	870								CHSY1	2409
						CIC	7554								CHTF18	2928
						CILK1	1899								CHTOP	747
						CILP2	3471								CHUK	2238
						CINP	639								CHURC1	339
						CIP2A	2718								CIAO1	1020
						CIPC	1200								CIAO2A	483
						CIR1	1353								CIAO2B	492
						CIRBP	894								CIAO3	1431
						CISD1	327								CIAPIN1	939
						CISD2	408								CIB1	576
						CISD3	384								CIB2	564
						CIT	6210								CIBAR1	870
						CITED2	813								CIC	7554
						CIZ1	2697								CILK1	1899
						CKAP2	2049								CILP2	3471
						CKAP2L	2238								CINP	639
						CKAP4	1809								CIP2A	2718
						CKAP5	6099								CIPC	1200
						CKB	1146								CIR1	1353
						CKLF	459								CIRBP	894
						CKMT1A	1254								CISD1	327
						CKMT1B	1254								CISD2	408
						CKS1B	240								CISD3	384
						CKS2	240								CIT	6210
						CLASP1	4680								CITED2	813
						CLASP2	4521								CIZ1	2697
						CLASRP	2025								CKAP2	2049
						CLBA1	978								CKAP2L	2238
						CLCC1	1656								CKAP4	1809
						CLCN3	2457								CKAP5	6099
						CLCN5	2451								CKB	1146
						CLCN6	2610								CKLF	459
						CLCN7	2418								CKMT1A	1254
						CLDN12	735								CKMT1B	1254
						CLDN15	687								CKS1B	240
						CLDND1	762								CKS2	240
						CLEC16A	3162								CLASP1	4680
						CLGN	1833								CLASP2	4521
						CLIC1	726								CLASRP	2025
						CLIC4	762								CLBA1	978
						CLINT1	1878								CLCC1	1656
						CLIP1	4317								CLCN3	2457
						CLIP2	3141								CLCN5	2451
						CLIP4	2118								CLCN6	2610
						CLK1	1455								CLCN7	2418
						CLK2	1500								CLDN12	735
						CLK3	1473								CLDN15	687
						CLK4	1446								CLDND1	762
						CLMN	3009								CLEC16A	3162
						CLN5	1077								CLGN	1833
						CLN6	936								CLIC1	726
						CLN8	861								CLIC4	762
						CLNS1A	714								CLINT1	1878
						CLOCK	2541								CLIP1	4317
						CLP1	1278								CLIP2	3141
						CLPB	2034								CLIP4	2118
						CLPP	834								CLK1	1455
						CLPTM1	2010								CLK2	1500
						CLPTM1L	1617								CLK3	1473
						CLPX	1902								CLK4	1446
						CLSPN	4020								CLMN	3009
						CLSTN1	2946								CLN5	1077
						CLSTN3	2871								CLN6	936
						CLTA	657								CLN8	861
						CLTB	690								CLNS1A	714
						CLTC	5028								CLOCK	2541
						CLTCL1	4923								CLP1	1278
						CLU	1350								CLPB	2034
						CLUAP1	1242								CLPP	834
						CLUH	4047								CLPTM1	2010
						CMAS	1305								CLPTM1L	1617
						CMBL	738								CLPX	1902
						CMC1	321								CLSPN	4020
						CMC2	240								CLSTN1	2946
						CMIP	2322								CLSTN3	2871
						CMPK1	687								CLTA	657
						CMSS1	840								CLTB	690
						CMTM3	549								CLTC	5028
						CMTM4	627								CLTCL1	4923
						CMTM6	552								CLU	1350
						CMTM7	528								CLUAP1	1242
						CMTM8	522								CLUH	4047
						CMTR1	2508								CLYBL	1023
						CMTR2	2313								CMAS	1305
						CNBP	534								CMBL	738
						CNDP2	1428								CMC1	321
						CNEP1R1	378								CMC2	240
						CNIH1	435								CMIP	2322
						CNIH4	420								CMPK1	687
						CNKSR3	1668								CMSS1	840
						CNN2	930								CMTM3	549
						CNN3	990								CMTM4	627
						CNNM1	2856								CMTM6	552
						CNNM2	2628								CMTM7	528
						CNNM3	2124								CMTM8	522
						CNNM4	2328								CMTR1	2508
						CNOT1	7131								CMTR2	2313
						CNOT10	2235								CNBP	534
						CNOT11	1533								CNDP2	1428
						CNOT2	1623								CNEP1R1	378
						CNOT3	2262								CNIH1	435
						CNOT4	2142								CNIH4	420
						CNOT6	1674								CNKSR3	1668
						CNOT6L	1668								CNN2	930
						CNOT7	858								CNN3	990
						CNOT8	879								CNNM2	2628
						CNOT9	900								CNNM3	2124
						CNP	1266								CNNM4	2328
						CNPPD1	1233								CNOT1	7131
						CNPY2	549								CNOT10	2235
						CNPY3	837								CNOT11	1533
						CNPY4	747								CNOT2	1623
						CNRIP1	495								CNOT3	2262
						CNST	2178								CNOT4	2142
						CNTLN	4221								CNOT6	1674
						CNTN1	3057								CNOT6L	1668
						CNTNAP1	4155								CNOT7	858
						CNTNAP3B	3867								CNOT8	879
						CNTRL	6978								CNOT9	900
						CNTROB	2712								CNP	1266
						COA1	441								CNPPD1	1233
						COA3	321								CNPY2	549
						COA4	264								CNPY3	837
						COA5	225								CNPY4	747
						COA6	468								CNRIP1	495
						COA7	696								CNST	2178
						COA8	582								CNTFR	1119
						COASY	1695								CNTLN	4221
						COBL	3786								CNTN1	3057
						COBLL1	3387								CNTNAP1	4155
						COCH	1653								CNTRL	6978
						COG1	2943								CNTROB	2712
						COG2	2217								COA1	441
						COG3	2487								COA3	321
						COG4	2370								COA4	264
						COG5	2583								COA5	225
						COG6	1974								COA6	468
						COG7	2313								COA7	696
						COG8	1839								COA8	582
						COIL	1731								COASY	1695
						COL14A1	5391								COBL	3786
						COL18A1	4020								COBLL1	3387
						COL1A1	4395								COCH	1653
						COL25A1	1965								COG1	2943
						COL27A1	5583								COG2	2217
						COL3A1	4401								COG3	2487
						COL4A1	5010								COG4	2370
						COL4A2	5139								COG5	2583
						COL4A5	5076								COG6	1974
						COL4A6	5073								COG7	2313
						COL5A1	5517								COG8	1839
						COL5A2	4500								COIL	1731
						COL6A1	3087								COL14A1	5391
						COL6A2	3060								COL18A1	4020
						COL7A1	8835								COL1A1	4395
						COLEC12	2229								COL25A1	1965
						COLGALT1	1869								COL26A1	1326
						COLGALT2	1881								COL27A1	5583
						COMMD1	573								COL3A1	4401
						COMMD10	609								COL4A1	5010
						COMMD2	600								COL4A2	5139
						COMMD3	588								COL4A5	5076
						COMMD4	600								COL4A6	5073
						COMMD5	675								COL5A1	5517
						COMMD6	258								COL5A2	4500
						COMMD7	603								COL6A1	3087
						COMMD8	552								COL6A2	3060
						COMMD9	597								COLEC12	2229
						COMT	816								COLGALT1	1869
						COMTD1	789								COLGALT2	1881
						COP1	2196								COMMD1	573
						COPA	3675								COMMD10	609
						COPB1	2862								COMMD2	600
						COPB2	2721								COMMD3	588
						COPE	927								COMMD4	600
						COPG1	2625								COMMD5	675
						COPG2	2616								COMMD6	258
						COPRS	555								COMMD7	603
						COPS2	1332								COMMD8	552
						COPS3	1272								COMMD9	597
						COPS4	1221								COMT	816
						COPS5	1005								COMTD1	789
						COPS6	984								COP1	2196
						COPS7A	828								COPA	3675
						COPS7B	795								COPB1	2862
						COPS8	630								COPB2	2721
						COPS9	174								COPE	927
						COPZ1	534								COPG1	2625
						COQ10A	744								COPG2	2616
						COQ10B	717								COPRS	555
						COQ2	1116								COPS2	1332
						COQ3	1110								COPS3	1272
						COQ4	798								COPS4	1221
						COQ5	984								COPS5	1005
						COQ6	1407								COPS6	984
						COQ7	654								COPS7A	828
						COQ8B	1635								COPS7B	795
						COQ9	957								COPS8	630
						CORO1B	1470								COPS9	174
						CORO1C	1425								COPZ1	534
						CORO2A	1578								COQ10A	744
						CORO6	1419								COQ10B	717
						COTL1	429								COQ2	1116
						COX10	1332								COQ3	1110
						COX11	831								COQ4	798
						COX14	174								COQ5	984
						COX15	1233								COQ6	1407
						COX17	192								COQ7	654
						COX18	1005								COQ8B	1635
						COX19	273								COQ9	957
						COX20	357								CORO1B	1470
						COX4I1	510								CORO1C	1425
						COX5A	453								CORO2A	1578
						COX5B	390								COTL1	429
						COX6A1	330								COX10	1332
						COX6B1	261								COX11	831
						COX6C	228								COX14	174
						COX7A2	252								COX15	1233
						COX7A2L	345								COX17	192
						COX7B	243								COX18	1005
						COX7C	192								COX19	273
						COX8A	210								COX20	357
						CPD	4143								COX4I1	510
						CPE	1431								COX5A	453
						CPEB4	2190								COX5B	390
						CPLANE1	9756								COX6A1	330
						CPNE1	1614								COX6B1	261
						CPNE2	1647								COX6C	228
						CPNE3	1614								COX7A2	252
						CPNE7	1677								COX7A2L	345
						CPNE8	1695								COX7B	243
						CPOX	1365								COX7C	192
						CPS1	4503								COX8A	210
						CPSF1	4332								CPD	4143
						CPSF2	2349								CPE	1431
						CPSF3	2055								CPEB2	3105
						CPSF4	810								CPEB4	2190
						CPSF6	1656								CPLANE1	9756
						CPSF7	1389								CPNE1	1614
						CPT1A	2322								CPNE2	1647
						CPT1C	2412								CPNE3	1614
						CPT2	1977								CPNE8	1695
						CPTP	645								CPOX	1365
						CPVL	1431								CPS1	4503
						CRABP2	417								CPSF1	4332
						CRACD	3702								CPSF2	2349
						CRACR2A	2196								CPSF3	2055
						CRAMP1	3810								CPSF4	810
						CRAT	1881								CPSF6	1656
						CRBN	1329								CPSF7	1389
						CRCP	447								CPT1A	2322
						CREB1	984								CPT1C	2412
						CREB3	1116								CPT2	1977
						CREB3L2	1563								CPTP	645
						CREB3L4	1188								CPVL	1431
						CREB5	1527								CRABP2	417
						CREBBP	7329								CRACD	3702
						CREBL2	363								CRACR2A	2196
						CREBRF	1920								CRAMP1	3810
						CREBZF	1065								CRAT	1881
						CREG1	663								CRBN	1329
						CRELD2	1062								CRCP	447
						CREM	900								CREB1	984
						CRIM1	331								CREB3	1116
						CRIPT	306								CREB3L2	1563
						CRISPLD1	1503								CREB3L4	1188
						CRK	915								CREB5	1527
						CRKL	912								CREBBP	7329
						CRLF3	1329								CREBL2	363
						CRNKL1	2064								CREBRF	1920
						CROCC	6054								CREBZF	1065
						CROT	1839								CREG1	663
						CRTAP	1206								CRELD2	1062
						CRTC1	1905								CREM	900
						CRTC2	2082								CRIM1	331
						CRTC3	1860								CRIPT	306
						CRY1	1761								CRISPLD1	1503
						CRY2	1782								CRK	915
						CRYBG3	8913								CRKL	912
						CRYGD	525								CRLF3	1329
						CRYL1	960								CRLS1	906
						CRYZ	990								CRNKL1	2064
						CRYZL1	1050								CROCC	6054
						CS	1401								CROT	1839
						CSAG2	384								CRTAP	1206
						CSAG3	384								CRTC1	1905
						CSDE1	2397								CRTC2	2082
						CSE1L	2916								CRTC3	1860
						CSGALNACT2	1629								CRY1	1761
						CSK	1353								CRY2	1782
						CSNK1A1	1014								CRYBG3	8913
						CSNK1D	1248								CRYGD	525
						CSNK1E	1251								CRYL1	960
						CSNK1G1	1269								CRYZ	990
						CSNK1G2	1248								CRYZL1	1050
						CSNK1G3	1371								CS	1401
						CSNK2A1	1176								CSAG2	384
						CSNK2A2	1053								CSAG3	384
						CSNK2B	705								CSDE1	2397
						CSPG4	6969								CSE1L	2916
						CSPG5	1620								CSGALNACT2	1629
						CSPP1	3681								CSK	1353
						CSRNP1	1770								CSNK1A1	1014
						CSRNP2	1632								CSNK1D	1248
						CSRNP3	1758								CSNK1E	1251
						CSRP2	582								CSNK1G1	1269
						CST3	441								CSNK1G2	1248
						CSTB	297								CSNK1G3	1371
						CSTF1	1296								CSNK2A1	1176
						CSTF2	1734								CSNK2A2	1053
						CSTF2T	1851								CSNK2B	705
						CSTF3	2154								CSPG4	6969
						CT45A10	570								CSPG5	1620
						CTBP1	1290								CSPP1	3681
						CTBP2	2958								CSRNP1	1770
						CTBS	1158								CSRNP2	1632
						CTC1	3654								CSRNP3	1758
						CTCF	2184								CSRP2	582
						CTDNEP1	735								CST3	441
						CTDP1	2417								CSTB	297
						CTDSP1	786								CSTF1	1296
						CTDSP2	816								CSTF2	1734
						CTDSPL	831								CSTF2T	1851
						CTDSPL2	1401								CSTF3	2154
						CTH	1218								CT45A10	570
						CTIF	1797								CTBP1	1290
						CTNNA1	2721								CTBP2	2958
						CTNNAL1	2205								CTBS	1158
						CTNNB1	2346								CTC1	3654
						CTNNBIP1	246								CTCF	2184
						CTNNBL1	1692								CTDNEP1	735
						CTNND1	2907								CTDP1	2417
						CTNS	1104								CTDSP1	786
						CTPS1	1776								CTDSP2	816
						CTPS2	1761								CTDSPL	831
						CTR9	3522								CTDSPL2	1401
						CTSA	1443								CTH	1218
						CTSB	1020								CTIF	1797
						CTSC	1392								CTNNA1	2721
						CTSD	1239								CTNNAL1	2205
						CTSF	1455								CTNNB1	2346
						CTSH	1008								CTNNBIP1	246
						CTSL	1002								CTNNBL1	1692
						CTSV	1005								CTNND1	2907
						CTSZ	912								CTNS	1104
						CTTN	1905								CTPS1	1776
						CTTNBP2	4992								CTPS2	1761
						CTTNBP2NL	1920								CTR9	3522
						CTU1	1047								CTSA	1443
						CTU2	1548								CTSB	1020
						CUEDC1	1161								CTSC	1392
						CUEDC2	864								CTSD	1239
						CUL1	2331								CTSF	1455
						CUL2	2238								CTSH	1008
						CUL3	2307								CTSL	1002
						CUL4A	2280								CTSV	1005
						CUL4B	2688								CTSZ	912
						CUL5	2343								CTTN	1905
						CUL7	5097								CTTNBP2	4992
						CUL9	7554								CTTNBP2NL	1920
						CUTA	597								CTU1	1047
						CUTC	822								CTU2	1548
						CUX1	4518								CTXN1	249
						CWC15	690								CUEDC1	1161
						CWC22	2727								CUEDC2	864
						CWC25	1278								CUL1	2331
						CWC27	1419								CUL2	2238
						CWF19L1	1617								CUL3	2307
						CWF19L2	2685								CUL4A	2280
						CXADR	1098								CUL4B	2688
						CXCL16	765								CUL5	2343
						CXCR4	1059								CUL7	5097
						CXorf38	960								CUL9	7554
						CXXC1	1971								CUTA	597
						CXXC5	969								CUTC	822
						CYB561	756								CUX1	4518
						CYB561A3	729								CWC15	690
						CYB561D1	690								CWC22	2727
						CYB561D2	669								CWC25	1278
						CYB5A	405								CWC27	1419
						CYB5B	453								CWF19L1	1617
						CYB5D2	795								CWF19L2	2685
						CYB5R1	918								CXADR	1098
						CYB5R3	906								CXCL16	765
						CYB5R4	1566								CXCR4	1059
						CYB5RL	948								CXorf38	960
						CYBA	588								CXXC1	1971
						CYBC1	564								CXXC5	969
						CYBRD1	861								CYB561	756
						CYC1	978								CYB561A3	729
						CYCS	318								CYB561D1	690
						CYFIP1	3759								CYB561D2	669
						CYFIP2	3762								CYB5A	405
						CYLD	2871								CYB5B	453
						CYP20A1	1389								CYB5D2	795
						CYP2R1	1506								CYB5R1	918
						CYP2S1	1515								CYB5R3	906
						CYP2U1	1635								CYB5R4	1566
						CYP4V2	1578								CYB5RL	948
						CYREN	474								CYBA	588
						CYRIB	975								CYBC1	564
						CYSTM1	294								CYBRD1	861
						CYTH1	1197								CYC1	978
						CYTH2	1200								CYCS	318
						CYTH3	1200								CYFIP1	3759
						CZIB	483								CYFIP2	3762
						D2HGDH	1566								CYLD	2871
						DAAM1	3207								CYP20A1	1389
						DAAM2	3207								CYP26B1	1539
						DAB2	2313								CYP2R1	1506
						DAB2IP	3570								CYP2S1	1515
						DACH1	2121								CYP2U1	1635
						DAD1	342								CYP4V2	1578
						DAG1	2688								CYREN	474
						DAGLB	2019								CYRIB	975
						DALRD3	1632								CYSTM1	294
						DAP	309								CYTH1	1197
						DAP3	1197								CYTH2	1200
						DAPK1	4293								CYTH3	1200
						DAPK3	1365								CZIB	483
						DARS1	1506								D2HGDH	1566
						DARS2	1938								DAAM1	3207
						DAXX	2223								DAAM2	3207
						DAZAP1	1224								DAB2	2313
						DAZAP2	507								DAB2IP	3570
						DBF4	2025								DACH1	2121
						DBF4B	1848								DAD1	342
						DBI	264								DAG1	2688
						DBN1	2088								DAGLB	2019
						DBNDD1	477								DALRD3	1632
						DBNL	1293								DAP	309
						DBR1	1635								DAP3	1197
						DBT	1449								DAPK1	4293
						DCAF1	4524								DAPK3	1365
						DCAF10	1680								DARS1	1506
						DCAF11	1641								DARS2	1938
						DCAF12	1362								DAXX	2223
						DCAF13	1338								DAZAP1	1224
						DCAF15	1803								DAZAP2	507
						DCAF16	651								DBF4	2025
						DCAF17	1563								DBF4B	1848
						DCAF4	1488								DBI	264
						DCAF5	2829								DBN1	2088
						DCAF6	2856								DBNDD1	477
						DCAF7	1029								DBNL	1293
						DCAF8	1794								DBP	978
						DCAKD	696								DBR1	1635
						DCBLD1	2148								DBT	1449
[truncated: 8,142 more rows]
